# Supplementary material for: Spatially resolved, multimodal in vivo Perturb-seq using antibody-based cell hashing
Source: bioRxiv preprint, doi:10.64898/2026.05.25.727765, version 1 (2026-05-26)
Supplement: Extended Data Table 3 [file 727765_file07.xlsx]

## Sheet: colony_catalog
colony	chip	n_cells	n_wells	pStat	centroid_row	centroid_col	periphery_wells	guide	majority_ct2	majority_ct2_pct	second_ct2	second_ct2_pct	mean_proliferation_score	mean_dpt_pseudotime_mye_Eri_Neu_traj_with_multiGuide	mean_dpt_scaled_mye_Eri_Neu_traj_with_multiGuide	Proliferation_all_mean	Proliferation_all_max	Proliferation_ct2_majority_mean	Proliferation_ct2_majority_max	cell_type_max_prolif	dpt_pseudotime_mye_Eri_Neu_traj_with_multiGuide_mean	dpt_pseudotime_mye_Eri_Neu_traj_with_multiGuide_median	dpt_pseudotime_mye_Eri_Neu_traj_with_multiGuide_var	dpt_pseudotime_mye_Eri_Neu_traj_with_multiGuide_min	dpt_pseudotime_mye_Eri_Neu_traj_with_multiGuide_max	dpt_pseudotime_mye_Eri_Neu_traj_with_multiGuide_p10	dpt_pseudotime_mye_Eri_Neu_traj_with_multiGuide_p25	dpt_pseudotime_mye_Eri_Neu_traj_with_multiGuide_p75	dpt_pseudotime_mye_Eri_Neu_traj_with_multiGuide_p90	dpt_pseudotime_mye_Eri_Neu_traj_with_multiGuide_ct2_majority_mean	dpt_pseudotime_mye_Eri_Neu_traj_with_multiGuide_ct2_majority_median	dpt_pseudotime_mye_Eri_Neu_traj_with_multiGuide_ct2_majority_var	dpt_pseudotime_mye_Eri_Neu_traj_with_multiGuide_ct2_majority_min	dpt_pseudotime_mye_Eri_Neu_traj_with_multiGuide_ct2_majority_max	dpt_pseudotime_mye_Eri_Neu_traj_with_multiGuide_ct2_majority_p10	dpt_pseudotime_mye_Eri_Neu_traj_with_multiGuide_ct2_majority_p25	dpt_pseudotime_mye_Eri_Neu_traj_with_multiGuide_ct2_majority_p75	dpt_pseudotime_mye_Eri_Neu_traj_with_multiGuide_ct2_majority_p90	N_cells_majority_ct2	n_periphery	n_interior	n_cell_types	diversity_shannon	diversity_effective_n	diversity_simpson	log10_size	section	founder_HSC_flag	kmeans_cluster_id
spcln2_cln001202|cln001289_cc530	846	260	70	Multiple																																											2	FALSE
spcln656	846	244	78	NTC	40.14	28.13	35,26|35,27|35,30|35,31|36,25|36,26|36,29|37,26|37,29|38,22|38,23|38,24|38,25|38,26|38,27|38,29|38,30|38,31|38,32|38,33|38,34|39,23|39,24|39,27|39,29|39,33|39,34|40,24|40,27|40,28|40,29|40,33|41,23|41,24|41,25|41,33|41,34|42,23|42,25|42,30|42,31|42,32|42,33|43,25|43,26|43,27|43,28|43,29|43,30|43,32|44,25|44,26|44,28|44,29|45,25|45,26|45,28	NTC-Ms-7	EP	94.7	DBL	4.1	1.10797	0.409604	0.7416	1.10797	1.8019	1.1276	1.8019	EP	0.409604	0.416278	0.000232863	0.341008	0.42684	0.387881	0.398	0.420985	0.423424	0.410158	0.416282	0.000198789	0.36189	0.42684	0.388142	0.398046	0.421018	0.423428	231	57	21	2	0.049387	1.05063	0.01702	2.38917	2	FALSE	0
spcln2_cln000328|cln000329_cc475	846	174	79	NTC	35.56	26.06	30,22|31,21|31,23|31,24|31,27|32,21|32,22|32,23|32,24|32,26|32,27|33,18|33,19|33,24|33,25|34,18|34,19|34,20|34,22|34,25|34,26|34,27|34,28|34,30|34,33|34,34|35,21|35,22|35,23|35,24|35,25|35,27|35,29|35,30|35,31|35,33|35,34|36,21|36,23|36,27|36,28|36,29|36,30|36,31|36,33|37,21|37,23|37,29|37,30|37,32|38,21|38,22|38,23|38,24|38,25|38,26|38,27|38,28|38,29|38,31|38,32|38,33|38,34|39,23|39,24|39,31|39,…	NTC-Ms-3	EP	85.6	Neutrophil	10.3	0.934849	0.431003	0.749483	0.934849	1.94697	1.0754	1.94697	EP	0.431003	0.412177	0.00613457	0.347235	0.727856	0.383843	0.393027	0.42063	0.586913	0.40468	0.409808	0.00027673	0.347235	0.425181	0.383077	0.390953	0.419345	0.421857	149	70	9	3	0.376257	1.45682	0.201885	2.24304	2	FALSE	0
spcln618_cc0	846	169	74	Cebpa	31.39	39.89	27,36|27,37|27,41|28,32|28,35|28,39|28,40|29,33|29,34|29,36|29,37|29,39|29,40|29,41|29,42|29,43|29,45|29,46|30,33|30,35|30,36|30,37|30,39|30,40|30,43|30,44|30,45|30,46|31,33|31,34|31,35|31,36|31,37|31,38|31,39|31,40|31,42|31,43|31,44|31,45|31,46|32,34|32,35|32,38|32,40|32,41|32,42|32,43|32,45|33,37|33,38|33,39|33,40|33,41|33,42|33,44|33,45|34,37|34,38|34,40|34,42|34,43|34,44|34,45|35,39|35,40|35,…	Cebpa-BR	EP	92.9	MEP	5.3	0.981291	0.3964	0.705839	0.981291	1.83223	1.01684	1.83223	EP	0.3964	0.401092	0.000900755	0.174787	0.42359	0.365442	0.384179	0.419206	0.422079	0.400736	0.403484	0.000393966	0.346145	0.42359	0.370914	0.387663	0.419677	0.422146	157	73	1	2	0.210749	1.2346	0.102555	2.23045	1	FALSE	0
spcln3_cln008360_cc1226	846	163	80	NTC	49.54	32.59	44,34|44,35|44,36|45,29|45,30|45,31|45,32|45,33|45,34|45,36|45,37|46,29|46,30|46,31|46,32|46,33|46,36|46,37|47,28|47,30|47,33|47,34|47,35|47,36|48,26|48,27|48,28|48,29|48,30|48,31|48,32|48,34|48,35|48,37|49,25|49,28|49,29|49,30|49,33|49,35|50,29|50,30|50,33|50,35|51,28|51,29|51,30|51,31|51,32|51,33|51,34|52,29|52,30|52,33|52,34|52,35|52,36|53,31|53,32|53,33|53,34|53,35|53,36|54,31|54,33|54,35|54,…	NTC-Ms-6	EP	92.6	DBL	4.3	1.10199	0.411896	0.746263	1.10199	1.91044	1.13314	1.91044	EP	0.411896	0.417038	0.000482863	0.370071	0.611577	0.384963	0.401079	0.421878	0.424178	0.410573	0.417017	0.000218503	0.370071	0.426943	0.384796	0.401022	0.4218	0.424061	151	77	3	2	0.0396091	1.0404	0.0130713	2.21484	3	FALSE	0
spcln1_cln003378_cc274	846	146	71	Cebpa	6.31	37.15	0,31|0,34|1,30|1,31|1,32|1,33|1,34|1,35|1,36|2,31|2,32|2,33|2,34|2,35|2,37|3,32|3,35|3,36|3,38|4,32|4,33|4,38|5,31|5,32|5,35|5,36|5,38|5,39|5,40|6,30|6,32|6,35|6,36|6,37|6,38|6,39|6,40|6,41|7,34|7,36|7,37|7,39|7,43|8,34|8,36|8,38|8,39|8,40|8,41|8,42|8,43|9,37|9,38|9,39|9,41|9,42|10,36|10,38|10,40|10,41|10,42|10,43|10,44|10,45|11,42|12,42|13,41|14,39|14,40|14,42|14,43	Cebpa-BR	EP	99.3	MEP	0.7	0.989239	0.401679	0.727725	0.989239	1.89254	0.992295	1.89254	EP	0.401679	0.404062	0.000308279	0.339992	0.42434	0.379615	0.389151	0.41716	0.420614	0.402104	0.404716	0.000283812	0.347315	0.42434	0.380196	0.390298	0.417218	0.420615	145	71	0	2	0.0409601	1.04181	0.0136048	2.16732	1	FALSE	0
spcln2_cln002398_cc589	846	138	48	Cited2	41.77	18.48	35,17|36,17|37,16|37,17|37,18|38,17|38,18|38,20|39,16|39,19|39,21|40,16|40,18|40,19|40,20|40,21|40,22|41,15|41,16|41,18|41,19|41,21|41,22|42,15|42,16|42,17|42,18|42,19|43,15|43,16|43,18|43,19|43,20|44,15|44,16|44,19|44,20|45,17|45,18|45,20|46,18|46,19|46,20|46,21|46,22|46,23|47,21|47,22	Cited2-TF1.Br	Neutrophil	59.4	Macrophage Ly6c+	26.8	0.350882	0.525376	0.647425	0.350882	0.981994	0.34095	0.981994	pDC	0.525376	0.575288	0.0209517	0.0282404	0.671393	0.360344	0.500619	0.598996	0.64562	0.562378	0.581484	0.0082978	0.217391	0.671393	0.43433	0.537811	0.619263	0.658092	82	48	0	8	1.14393	3.13908	0.565081	2.14301	2	TRUE	1
spcln3_cln002638_cc1044	846	133	51	Hdac1	55.67	41.25	51,39|51,40|51,41|51,42|52,40|53,39|53,40|53,41|53,42|53,43|53,44|53,45|54,38|54,40|54,42|54,43|55,37|55,38|55,39|55,40|55,42|55,44|55,45|56,40|56,42|56,44|57,37|57,38|57,40|57,42|57,44|57,45|58,38|58,39|58,40|58,42|58,44|58,45|59,39|59,40|59,41|59,42|59,43|59,44|59,45|60,41	Hdac1-Br-1	Neutrophil	69.2	Macrophage Ly6c+	15	0.409249	0.432172	0.557276	0.409249	0.94744	0.477668	0.918759	EP	0.432172	0.434701	0.0190777	0.0378888	0.661737	0.270654	0.341357	0.547626	0.58574	0.431446	0.42656	0.0143061	0.195708	0.661737	0.281279	0.32624	0.545005	0.582439	92	46	5	8	0.991797	2.69607	0.462472	2.1271	3	TRUE	1
spcln3_cln001018|cln001087_cc900	846	128	42	Gltscr1	54.64	27.76	48,25|48,26|49,27|49,28|50,27|50,28|51,26|51,27|51,28|52,26|53,26|53,27|53,28|53,29|53,31|54,26|54,29|54,31|55,26|55,27|55,29|55,30|55,32|56,27|56,30|57,27|57,28|57,29|57,30|58,28|58,30|59,28|60,26|60,27|61,25|61,27|62,25	Gltscr1-As	Macrophage Ly6c+	84.4	HSC	7	0.281061	0.387837	0.387837	0.281061	0.853099	0.287204	0.781462	pDC	0.387837	0.438054	0.0307887	0.0333811	0.616688	0.0962624	0.256863	0.537941	0.578374	0.416665	0.470073	0.0243209	0.0333811	0.616688	0.176872	0.290336	0.548718	0.580567	108	37	5	7	0.641329	1.899	0.270197	2.11059	3	TRUE	2
spcln650_cc0	846	128	54	NTC	32.31	40.98	28,42|29,37|29,38|29,40|29,41|29,44|30,37|30,41|30,43|30,44|30,46|31,35|31,37|31,38|31,40|31,41|31,42|31,43|31,45|31,46|32,35|32,37|32,38|32,39|32,40|32,42|32,43|32,44|32,45|33,36|33,38|33,39|33,40|33,41|33,42|33,44|33,45|34,39|34,41|34,42|34,44|34,45|35,38|35,39|35,40|35,41|35,42|35,43|35,44|36,40|36,41|36,42|36,43	NTC-Ms-5	EP	93.8	DBL	2.3	1.03879	0.408904	0.737832	1.03879	1.68697	1.07145	1.68697	EP	0.408904	0.411801	0.00104888	0.366481	0.660123	0.384929	0.390121	0.418175	0.422064	0.405249	0.411098	0.000227589	0.366481	0.425767	0.384711	0.390093	0.418079	0.421448	120	53	1	2	0.0836497	1.08725	0.0322494	2.11059	1	FALSE	0
spcln5_cln002381|cln004301_cc1551	846	104	31	Mbd2	20.52	52.26	17,51|17,52|17,56|18,51|18,52|18,53|18,55|18,56|19,51|19,53|19,54|20,50|20,51|20,54|21,50|21,51|21,52|21,53|21,54|22,51|22,52|22,54|23,51|23,52|24,51|25,51|26,51|27,51	Mbd2-Br	EP	98.1	DBL	1.9	1.32808	0.418528	0.760232	1.32808	1.81121	1.33975	1.81121	EP	0.418528	0.41963	1.95008e-05	0.398436	0.423581	0.41439	0.416846	0.421287	0.422427	0.418528	0.41963	1.95008e-05	0.398436	0.423581	0.41439	0.416846	0.421287	0.422427	102	28	3	1	0	1	0	2.02119	5	FALSE	0
spcln3_cln001146_cc937	846	101	56	Cebpe	48.29	31.66	44,32|44,33|45,30|45,31|45,32|45,33|45,36|46,28|46,32|46,34|46,36|46,37|47,28|47,31|47,33|47,35|47,36|47,39|48,26|48,28|48,29|48,30|48,31|48,32|48,33|48,35|48,37|48,38|49,23|49,25|49,26|49,27|49,29|49,30|49,31|49,35|49,38|49,39|49,40|50,24|50,25|50,26|50,28|50,29|50,31|50,32|50,33|50,34|50,39|51,23|51,31|51,32|51,33|52,30|52,31|52,34	Cebpe-TF1.Br-1	EP	98	Neutrophil	2	1.29697	0.425928	0.767564	1.29697	1.88883	1.32886	1.88883	EP	0.425928	0.422021	0.000994135	0.406891	0.647803	0.419198	0.420591	0.422984	0.423819	0.421482	0.422008	5.80349e-06	0.406891	0.425195	0.419099	0.420567	0.42291	0.423695	99	56	0	2	0.0972675	1.10216	0.0388197	2.0086	3	FALSE	0
spcln3_cln004140|cln004405|cln007124_cc1120	846	97	35	Multiple																																											3	TRUE
spcln3_cln000061|cln000123_cc721	846	92	33	Multiple																																											3	FALSE
spcln641_cc0	846	89	33	Mbd2	76.3	57.09	72,56|72,57|73,57|74,57|75,53|75,55|75,57|75,58|75,59|75,61|76,53|76,54|76,55|76,57|76,58|76,60|76,62|77,54|77,55|77,56|77,57|77,58|77,60|78,53|78,55|78,56|78,57|78,58|78,60|78,61|79,57|79,58|79,60	Mbd2-Br	EP	74.2	Neutrophil	16.9	0.80317	0.433132	0.714328	0.80317	1.71293	0.950191	1.71293	EP	0.433132	0.40014	0.00892234	0.177318	0.662189	0.376204	0.385606	0.420706	0.591226	0.396755	0.395158	0.000268833	0.364704	0.422554	0.377021	0.385408	0.412655	0.419576	66	33	0	6	0.810483	2.24899	0.405992	1.95424	4	FALSE	0
spcln2_cln008279_cc666	846	86	33	Rcor1	36.52	31.82	33,32|33,33|34,34|35,27|35,28|35,29|35,30|35,31|35,32|35,33|35,34|36,27|36,28|36,29|36,30|36,31|36,33|36,34|37,29|37,31|37,32|37,33|37,34|38,31|38,32|38,33|38,34|38,35|39,33|39,35|39,36|40,33|41,34	Rcor1-As	Macrophage Ly6c+	91.9	BMP	2.3	0.310999	0.433055	0.433055	0.310999	0.959378	0.288147	0.835057	BMP	0.433055	0.496732	0.0267629	0.037193	0.640306	0.189669	0.294842	0.559574	0.602426	0.440277	0.500951	0.0249959	0.0484511	0.640306	0.196766	0.303974	0.561492	0.602536	79	33	0	5	0.304952	1.35656	0.114512	1.93952	2	TRUE	2
spcln3_cln001202|cln001289_cc943	846	85	33	Multiple																																											3	FALSE
spcln3_cln000443_cc801	846	84	35	Cited4	51.74	38.43	48,39|49,36|49,37|49,38|49,39|49,40|50,36|50,40|51,35|51,36|51,37|51,38|51,39|51,40|51,41|52,39|52,41|52,42|53,39|53,40|53,41|54,35|54,36|54,37|54,38|54,39|54,40|55,35|55,38|55,39|55,41	Cited4-TF1.Br	Neutrophil	77.4	Macrophage Ly6c+	17.9	0.49038	0.502249	0.64388	0.49038	1.4507	0.471878	0.882067	EP	0.502249	0.562691	0.0152798	0.0857902	0.663827	0.300911	0.435948	0.580706	0.598844	0.502527	0.562691	0.0153862	0.236283	0.663827	0.291571	0.414861	0.584369	0.603672	65	31	4	4	0.643633	1.90338	0.353317	1.92942	3	FALSE	1
spcln2_cln001202|cln001289_cc527	846	82	41	Hdac1	34.85	31.54	31,31|31,32|32,26|32,28|32,30|32,31|32,32|32,33|33,26|33,27|33,29|33,33|33,34|33,35|34,28|34,30|34,31|34,32|34,34|35,27|35,29|35,30|35,31|35,32|35,33|35,34|36,29|36,30|36,31|36,33|36,34|37,33|37,34|38,32|38,33|38,34|38,35|38,36|39,33|39,34|40,34	Hdac1-Br	EP	56.1	DBL	19.5	0.823309	0.39838	0.632276	0.823309	1.54613	0.930244	1.33874	DBL	0.39838	0.395693	0.00982151	0.126071	0.619912	0.27459	0.384887	0.410042	0.53327	0.394864	0.395336	0.000118535	0.366496	0.41644	0.38278	0.386117	0.401507	0.410422	46	41	0	5	0.913959	2.49418	0.463432	1.91908	2	FALSE	0
spcln623_cc0	846	81	39	Cebpa	47.33	52	43,54|43,55|43,56|44,48|44,49|44,51|44,52|44,53|45,49|45,51|45,53|45,54|46,50|46,51|46,52|46,53|47,50|47,52|47,54|48,50|48,51|48,52|48,53|48,55|48,56|49,52|50,48|50,51|51,49|51,50|51,52|51,53|51,54|51,55|52,51|52,53|53,53	Cebpa-BR	EP	100	B	0	1.22383	0.413945	0.751907	1.22383	1.89113	1.22383	1.89113	EP	0.413945	0.417521	0.000108485	0.376113	0.424731	0.399354	0.411341	0.421063	0.422525	0.413945	0.417521	0.000108485	0.376113	0.424731	0.399354	0.411341	0.421063	0.422525	81	37	2	1	0	1	0	1.91381	4	FALSE	0
spcln1_cln005069|cln007126|cln008372_cc346	846	80	46	Multiple																																											1	FALSE
spcln3_cln001432_cc978	846	73	31	Klf1	43.45	42.29	40,41|40,42|40,44|41,40|41,41|41,44|42,40|42,42|42,43|42,44|42,45|43,41|43,42|43,43|44,40|44,41|44,42|44,43|44,44|44,45|45,39|45,40|45,42|45,45|45,46|46,40|46,41|46,42|46,45|47,43	Klf1-TF1.Br	EP	78.1	MEP	9.6	0.571177	0.397137	0.685309	0.571177	1.48307	0.662056	1.48307	DBL Aggregate	0.397137	0.417566	0.00370448	0.178937	0.612894	0.339269	0.378044	0.422751	0.423776	0.406171	0.41856	0.00048628	0.348178	0.425634	0.369059	0.387223	0.422827	0.423533	57	30	1	4	0.541087	1.71787	0.264201	1.86923	3	FALSE	0
spcln2_cln000668_cc510	846	72	37	Irf8	35.14	24.76	30,22|31,22|31,25|32,23|32,25|32,26|33,22|33,23|33,25|33,26|33,27|34,23|34,26|35,22|35,23|35,24|35,25|35,26|36,22|36,24|36,25|36,26|36,29|37,22|37,23|37,24|37,26|37,27|37,28|37,29|38,23|38,24|38,26|38,28|38,29|39,23	Irf8-TF1.Br	EP	94.4	DBL	2.8	1.04441	0.412397	0.740425	1.04441	1.78102	1.08358	1.78102	EP	0.412397	0.412036	0.00173975	0.355016	0.651036	0.384303	0.395023	0.420031	0.422786	0.405842	0.410302	0.000258162	0.355016	0.423406	0.383888	0.394854	0.419483	0.422087	68	36	1	2	0.129741	1.13853	0.0555102	1.86332	2	FALSE	0
spcln1_cln003377_cc266	846	71	39	NTC	26.46	42.46	22,41|22,43|23,39|23,40|23,41|23,42|23,43|23,44|24,40|24,43|25,40|25,41|25,42|25,43|25,44|26,42|26,44|26,45|27,42|27,43|27,44|27,45|28,41|28,42|28,43|28,44|28,45|29,42|29,43|30,42|30,43|30,44|31,40|31,41|31,43|31,44|31,45	NTC-Ms-7	EP	88.7	DBL	9.9	1.1162	0.413913	0.747494	1.1162	1.74589	1.16405	1.74589	EP	0.413913	0.418485	0.000909837	0.275773	0.583629	0.388191	0.408908	0.422025	0.423692	0.411219	0.418281	0.000452566	0.275773	0.426071	0.388042	0.408044	0.421871	0.423478	63	37	2	2	0.0804848	1.08381	0.0307617	1.85733	1	FALSE	0
spcln2_cln001312|cln003504_cc543	846	69	28	Cebpa	37.46	34.68	34,33|34,34|34,35|35,35|35,36|35,37|36,33|36,34|36,35|36,36|36,37|37,37|38,31|38,32|38,33|38,34|38,35|38,36|38,37|39,34|39,35|39,36|39,37|40,33|40,35|41,32|41,34|41,35	Cebpa-BR	EP	88.4	DBL	4.3	1.0308	0.400758	0.717021	1.0308	1.63663	1.09353	1.63663	EP	0.400758	0.412873	0.00100271	0.250088	0.423723	0.37785	0.388367	0.41954	0.421459	0.406418	0.413577	0.000273384	0.360647	0.423723	0.383341	0.390993	0.41957	0.421835	61	28	0	2	0.189209	1.20829	0.0893555	1.8451	2	FALSE	0
spcln622_cc0	846	66	38	Cebpa	61.63	37.58	57,37|57,39|57,40|57,41|58,38|58,41|59,38|59,39|59,40|59,41|59,42|60,36|60,37|60,38|60,39|61,39|61,40|62,35|62,36|62,37|62,38|62,40|63,36|63,38|63,39|63,40|64,33|64,34|64,35|64,36|64,39|65,32|65,34|65,36|65,39|66,34|66,36|67,36	Cebpa-BR	EP	95.5	DBL	4.5	1.15416	0.409779	0.74434	1.15416	1.83655	1.16738	1.83655	EP	0.409779	0.415752	0.000202845	0.367134	0.423549	0.388372	0.399855	0.419815	0.422372	0.409779	0.415752	0.000202845	0.367134	0.423549	0.388372	0.399855	0.419815	0.422372	63	38	0	1	0	1	0	1.82607	3	FALSE	0
spcln1_cln001720_cc184	846	62	27	Multiple																																											1	FALSE
spcln1_cln002419|cln002580_cc230	846	59	29	Multiple																																											1	FALSE
spcln623_cc1	846	58	14	Cebpa	40.93	50	39,50|40,49|40,50|41,47|41,48|41,49|41,50|41,51|41,52|41,53|41,54|42,48|42,49|42,50	Cebpa-BR	EP	98.3	DBL	1.7	1.1112	0.407688	0.740542	1.1112	1.52606	1.11311	1.52606	EP	0.407688	0.409694	0.000115174	0.382058	0.421998	0.392843	0.400556	0.416222	0.419714	0.407688	0.409694	0.000115174	0.382058	0.421998	0.392843	0.400556	0.416222	0.419714	57	14	0	1	0	1	0	1.77085	4	FALSE	0
spcln1_cln002140_cc198	846	55	28	Gltscr1	20.11	41.54	17,38|17,41|17,42|17,43|17,44|18,38|18,40|18,44|19,38|19,39|19,40|19,41|19,42|20,39|20,40|20,41|20,42|20,43|21,40|21,42|22,41|22,42|22,43|23,42|23,44|24,45|25,45|26,44	Gltscr1-As	EP	96.4	CMP	1.8	1.13833	0.41448	0.744567	1.13833	1.76255	1.18327	1.76255	EP	0.41448	0.419275	0.00205509	0.184885	0.641187	0.39283	0.409691	0.422247	0.423045	0.414535	0.419275	0.000132019	0.376345	0.424636	0.394167	0.410393	0.422191	0.422994	53	28	0	3	0.181416	1.19891	0.0707438	1.74819	1	FALSE	0
spcln5_cln002563_cc1563	846	55	20	Pax5	22.95	51.9	18,54|19,53|20,52|21,50|21,51|21,52|22,51|22,52|23,51|23,52|24,50|24,51|24,53|24,54|25,51|25,52|25,53|25,54|26,51|27,51	Pax5-TF1.Br	EP	100	B	0	1.38805	0.419426	0.761864	1.38805	1.90257	1.38805	1.90257	EP	0.419426	0.420518	1.37746e-05	0.407103	0.424306	0.415031	0.418093	0.422039	0.42274	0.419426	0.420518	1.37746e-05	0.407103	0.424306	0.415031	0.418093	0.422039	0.42274	55	20	0	1	0	1	0	1.74819	5	FALSE	0
spcln2_cln000024_cc440	846	54	3	NTC	48.67	0.67	48,1|49,0|49,1	NTC-Ms-2	EP	66.7	Neutrophil	33.3	0.628379	0.489381	0.784876	0.628379	1.56921	1.07587	1.56921	EP	0.489381	0.417533	0.0140603	0.379646	0.70442	0.388221	0.408548	0.628122	0.670321	0.407313	0.410059	0.00017882	0.379646	0.426273	0.384127	0.402611	0.417533	0.420438	36	3	0	2	0.636514	1.88988	0.444444	1.74036	2	FALSE	4
spcln3_cln001312|cln003504_cc959	846	54	27	Cebpa	43.78	43.44	40,42|41,40|41,41|41,42|41,43|41,44|41,45|42,40|42,42|42,43|42,45|43,43|43,44|43,45|44,44|44,45|45,43|45,45|46,44|46,45|47,43|47,44|48,43|48,44|48,45|49,45	Cebpa-BR	EP	87	MEP	7.4	0.733641	0.377395	0.668171	0.733641	1.57529	0.757834	1.57529	DBL	0.377395	0.380762	0.00155912	0.214996	0.422832	0.347588	0.368187	0.397995	0.418841	0.38646	0.382291	0.000422897	0.343692	0.422832	0.363976	0.371382	0.400061	0.418993	47	26	1	2	0.274921	1.31643	0.14456	1.74036	3	FALSE	0
spcln1_cln001066_cc114	846	51	20	Cebpb	6.2	35.55	4,36|5,32|5,35|5,36|5,37|5,38|6,32|6,33|6,34|6,35|6,37|6,38|7,32|7,35|7,36|7,37|8,36|8,38|9,38	Cebpb-TF1.Br	EP	100	B	0	1.34599	0.419151	0.761364	1.34599	1.74663	1.34599	1.74663	EP	0.419151	0.420665	4.02309e-05	0.38557	0.424924	0.414697	0.419052	0.422419	0.422919	0.419151	0.420665	4.02309e-05	0.38557	0.424924	0.414697	0.419052	0.422419	0.422919	51	19	1	1	0	1	0	1.716	1	FALSE	0
spcln3_cln000757_cc860	846	51	28	Multiple																																											3	FALSE
spcln3_cln003377_cc1076	846	51	21	NTC	44.57	33.24	43,35|43,36|43,37|44,31|44,32|44,33|44,34|44,35|44,36|44,37|44,38|45,29|45,30|45,32|45,33|45,34|45,35|46,29|46,30|46,34|47,28	NTC-Ms-7	EP	92.2	DBL	3.9	1.11619	0.413811	0.751665	1.11619	1.73843	1.15137	1.73843	EP	0.413811	0.419673	0.000189949	0.373938	0.426476	0.39064	0.410994	0.422784	0.425611	0.413811	0.419673	0.000189949	0.373938	0.426476	0.39064	0.410994	0.422784	0.425611	47	21	0	2	0.101265	1.10657	0.0407986	1.716	3	FALSE	0
spcln4_cln007197|cln007270_cc1426	846	45	21	Multiple																																											4	TRUE
spcln659	846	45	18	Pax5	63.83	47.28	61,45|61,46|62,47|62,49|63,46|63,50|64,45|64,46|64,47|64,48|64,49|64,50|65,46|65,47|65,48|65,50|66,46|67,46	Pax5-TF1.Br	EP	86.7	Neutrophil	8.9	1.10769	0.442244	0.763899	1.10769	1.73981	1.30075	1.73981	EP	0.442244	0.42027	0.00503291	0.389401	0.642717	0.412586	0.415943	0.422027	0.565807	0.417259	0.420165	5.10735e-05	0.389401	0.422967	0.410991	0.415252	0.421929	0.42219	39	18	0	3	0.410915	1.5082	0.205579	1.66276	4	FALSE	0
spcln622_bcsplit2_cc0	846	44	24	Cebpa	55.62	25.04	51,25|51,26|52,26|53,26|54,24|54,25|54,26|55,22|55,23|55,25|55,26|55,27|56,21|56,27|57,22|57,24|57,25|57,26|57,27|58,26|58,27|59,24|59,26|60,25	Cebpa-BR	EP	97.7	Neutrophil	2.3	0.959901	0.407032	0.73239	0.959901	1.61087	0.982186	1.61087	EP	0.407032	0.399357	0.00146236	0.380359	0.64116	0.388508	0.392273	0.416179	0.419812	0.401587	0.39931	0.000161683	0.380359	0.42268	0.388413	0.392251	0.41578	0.418829	43	24	0	2	0.108471	1.11457	0.0444215	1.65321	3	FALSE	0
spcln1_cln001255|cln003625|cln003641_cc145	846	43	23	Multiple																																											1	TRUE
spcln5_cln000030|cln000031_cc1468	846	43	23	Multiple																																											5	FALSE
spcln4_cln000061|cln000123_cc1257	846	42	28	Multiple																																											4	FALSE
spcln5_cln000670_cc1519	846	42	19	NTC	15	55.89	13,56|13,57|13,58|14,53|14,55|14,56|14,57|15,54|15,55|15,56|15,57|15,58|16,54|16,55|16,56|16,58|17,54|17,56|17,57	NTC-Ms-3	EP	100	B	0	1.30734	0.417335	0.758066	1.30734	1.64187	1.30734	1.64187	EP	0.417335	0.417113	3.02036e-05	0.403064	0.426933	0.410242	0.413529	0.422286	0.424019	0.417335	0.417113	3.02036e-05	0.403064	0.426933	0.410242	0.413529	0.422286	0.424019	42	19	0	1	0	1	0	1.63347	5	FALSE	0
spcln627_cc0	846	42	22	Cited2	51.05	35.55	49,37|49,38|49,39|50,34|50,35|50,36|50,37|50,38|51,32|51,33|51,34|51,36|51,37|51,38|52,33|52,35|52,36|52,37|53,32|53,34|53,35|53,36	Cited2-TF1.Br-1	Neutrophil	33.3	Macrophage Ly6c+	19	0.459695	0.430149	0.544541	0.459695	0.951834	0.551986	0.77963	pDC	0.430149	0.455619	0.02309	0.115771	0.63758	0.197448	0.336783	0.566339	0.594168	0.521261	0.556497	0.00706717	0.30377	0.594571	0.425656	0.482009	0.574953	0.593025	14	22	0	9	1.8493	6.35536	0.804989	1.63347	3	FALSE	3
spcln2_cln001559_cc565	846	39	22	Multiple																																											2	FALSE
spcln3_cln000030|cln000031_cc702	846	39	27	Multiple																																											3	FALSE
spcln3_cln000559_cc810	846	39	17	Hdac3	56.71	27.71	55,26|55,27|55,28|55,29|56,26|56,28|56,29|56,30|57,26|57,27|57,28|57,29|57,30|58,26|58,29|59,26|60,27	Hdac3-Br-1	Neutrophil	59	EP	28.2	0.360208	0.518699	0.736451	0.360208	0.927775	0.309019	0.917657	DC	0.518699	0.575524	0.0112578	0.333367	0.661121	0.373049	0.39104	0.598951	0.626937	0.594964	0.588839	0.000996983	0.540898	0.661121	0.549651	0.57936	0.613876	0.636583	23	17	0	6	1.10255	3.01183	0.568047	1.60206	3	FALSE	1
spcln3_cln002145_cc997	846	39	24	Mbd3	50.71	42.25	47,44|48,42|48,43|48,44|48,45|48,46|49,43|50,42|50,43|50,44|50,45|51,40|51,41|52,38|52,39|52,40|52,41|52,42|52,43|52,44|53,40|53,41|54,42|55,42	Mbd3-As	EP	84.6	Neutrophil	7.7	0.766189	0.412985	0.71833	0.766189	1.36197	0.875817	1.36197	EP	0.412985	0.398304	0.00476799	0.326221	0.646046	0.378812	0.385205	0.406252	0.41297	0.395334	0.395112	0.00012851	0.376581	0.420756	0.380108	0.385205	0.405611	0.407269	33	24	0	3	0.403334	1.49681	0.197224	1.60206	3	FALSE	0
spcln620_cc0	846	38	22	Cebpa	45.41	38.91	43,35|43,38|43,40|43,41|44,36|44,37|44,38|44,40|44,41|45,38|45,40|46,37|46,38|46,39|46,40|46,41|47,39|47,40|48,39|48,40|48,41|49,38	Cebpa-BR	EP	97.4	DBL	2.6	1.12779	0.410676	0.74597	1.12779	1.78889	1.14188	1.78889	EP	0.410676	0.413823	0.000128312	0.384963	0.423045	0.390389	0.405166	0.419425	0.42115	0.410676	0.413823	0.000128312	0.384963	0.423045	0.390389	0.405166	0.419425	0.42115	37	22	0	1	0	1	0	1.59106	3	FALSE	0
spcln633_cc0	846	38	13	Gltscr1	50.69	33.62	49,32|49,33|50,33|50,35|50,36|51,31|51,32|51,33|51,34|51,35|51,36|52,34|53,33	Gltscr1-As	Macrophage Ly6c+	94.7	Neutrophil	2.6	0.420246	0.486237	0.492008	0.420246	0.769705	0.455397	0.769705	Macrophage Ly6c+	0.486237	0.54487	0.0151705	0.119109	0.63542	0.29882	0.451145	0.561435	0.578126	0.482235	0.5407	0.0149945	0.119109	0.63542	0.296862	0.443645	0.561325	0.574425	36	13	0	3	0.242673	1.27465	0.101108	1.59106	3	FALSE	2
spcln669	846	38	28	Smarcd1	20	38.21	15,38|16,36|16,37|16,39|17,38|18,36|18,37|19,36|19,37|19,38|19,39|19,40|20,36|20,38|20,40|20,41|21,35|21,38|21,40|22,39|22,41|23,36|23,37|23,38|23,39|23,40|23,41|24,40	Smarcd1-As	EP	97.4	Neutrophil	2.6	1.06746	0.418418	0.752128	1.06746	1.60762	1.10053	1.60762	EP	0.418418	0.417269	0.00140724	0.390563	0.628885	0.396128	0.40235	0.420264	0.422404	0.41273	0.417084	0.000182623	0.390563	0.464539	0.395943	0.402337	0.420019	0.421929	37	28	0	2	0.121692	1.12941	0.0512465	1.59106	1	FALSE	0
spcln4_cln000757_cc1326	846	37	21	Multiple																																											4	FALSE
spcln1_cln002347_cc214	846	35	16	Men1	24.44	27.19	22,28|22,29|23,28|23,29|24,25|24,28|24,29|25,24|25,25|25,26|25,27|25,28|26,25|26,27|26,28|26,29	Men1-As	EP	88.6	DBL	5.7	1.0999	0.422487	0.757772	1.0999	1.73229	1.19026	1.73229	EP	0.422487	0.419978	0.00176849	0.382586	0.646608	0.39961	0.414577	0.421984	0.422734	0.415257	0.419718	9.90915e-05	0.382586	0.424218	0.39932	0.414371	0.421897	0.422484	31	16	0	3	0.270641	1.3108	0.115702	1.5563	1	FALSE	0
spcln619_bcsplit0_cc0	846	35	19	Cebpa	35.79	34.68	31,32|32,32|32,33|33,33|34,33|34,36|35,33|35,37|36,34|36,35|36,36|36,37|37,36|38,34|38,36|39,33|39,35|39,37|40,37	Cebpa-BR	EP	91.4	DBL	2.9	1.00485	0.402513	0.722378	1.00485	1.56496	1.07154	1.56496	EP	0.402513	0.409387	0.000379295	0.354244	0.422985	0.379702	0.387903	0.419342	0.42173	0.404022	0.410037	0.000314024	0.359599	0.422985	0.380256	0.388484	0.419632	0.421749	32	19	0	2	0.135794	1.14545	0.0587695	1.5563	2	FALSE	0
spcln2_cln001879_cc578	846	34	17	Rcor1	35.65	17.47	32,19|32,20|33,18|33,19|34,18|34,19|35,17|35,18|36,16|36,17|37,16|37,17|37,18|38,16|38,17|39,16|40,16	Rcor1-As-1	Macrophage Ly6c+	91.2	DBL	8.8	0.297596	0.544089	0.544089	0.297596	0.811246	0.250963	0.683387	DBL	0.544089	0.563633	0.00625605	0.248069	0.637654	0.442319	0.538856	0.586022	0.605639	0.544089	0.563633	0.00625605	0.248069	0.637654	0.442319	0.538856	0.586022	0.605639	31	17	0	1	0	1	0	1.54407	2	FALSE	2
spcln2_cln008327|cln008331_cc678	846	33	16	Multiple																																											2	FALSE
spcln647_bcsplit0_cc0	846	32	17	NTC	36.35	25.12	35,23|35,24|35,25|35,27|35,28|36,23|36,24|36,25|36,26|36,28|37,24|37,25|37,27|38,23|38,24|38,25|38,26	NTC-Ms-3	EP	100	B	0	1.40213	0.420831	0.764415	1.40213	1.77567	1.40213	1.77567	EP	0.420831	0.421377	9.25173e-06	0.415133	0.427007	0.416699	0.418112	0.422606	0.424558	0.420831	0.421377	9.25173e-06	0.415133	0.427007	0.416699	0.418112	0.422606	0.424558	32	17	0	1	0	1	0	1.51851	2	FALSE	0
spcln1_cln000997|cln007268_cc111	846	31	14	Multiple																																											1	TRUE
spcln3_cln000559_cc807	846	31	19	Hdac3	52.11	23.16	50,24|50,25|51,20|51,22|51,23|51,25|51,26|51,27|52,21|52,25|52,26|52,27|53,19|53,20|53,25|53,27|54,19|55,19|55,20	Hdac3-Br-1	Neutrophil	64.5	EP	22.6	0.284743	0.549904	0.762204	0.284743	0.877915	0.134595	0.877915	DBL	0.549904	0.594464	0.0132153	0.339121	0.667744	0.372177	0.422893	0.636711	0.661186	0.623258	0.621722	0.000911508	0.58	0.667744	0.584949	0.595212	0.647037	0.663729	20	19	0	4	0.903787	2.46894	0.495556	1.50515	3	FALSE	1
spcln618_bcsplit0_cc1	846	31	19	Cebpa	29.95	42.89	27,45|28,45|28,46|29,40|29,41|29,42|29,43|29,44|29,46|30,41|30,46|31,40|31,41|31,42|31,45|32,40|32,41|32,42|32,45	Cebpa-BR	EP	100	B	0	1.14158	0.407749	0.740654	1.14158	1.77536	1.14158	1.77536	EP	0.407749	0.410825	0.000149931	0.385223	0.42287	0.390308	0.395805	0.417668	0.421016	0.407749	0.410825	0.000149931	0.385223	0.42287	0.390308	0.395805	0.417668	0.421016	31	19	0	1	0	1	0	1.50515	1	FALSE	0
spcln1_cln000328|cln000329_cc54	846	30	18	NTC	24.17	38.78	21,38|22,37|22,38|22,40|23,38|23,39|23,40|24,38|24,40|25,38|25,39|25,40|26,37|26,38|26,40|27,38|27,41	NTC-Ms-3	EP	100	B	0	1.12237	0.405637	0.736817	1.12237	1.77902	1.12237	1.77902	EP	0.405637	0.413226	0.000257794	0.37895	0.424996	0.383065	0.391966	0.419772	0.422076	0.405637	0.413226	0.000257794	0.37895	0.424996	0.383065	0.391966	0.419772	0.422076	30	17	1	1	0	1	0	1.49136	1	FALSE	0
spcln4_cln002145_cc1363	846	30	16	Mbd3	53.06	47.88	51,47|51,48|51,49|51,50|52,48|52,49|53,46|53,47|53,48|53,49|54,47|54,48|55,46|55,47|55,49|56,48	Mbd3-As	EP	73.3	Neutrophil	20	0.619355	0.447827	0.747357	0.619355	1.65551	0.885799	1.65551	DBL	0.447827	0.393615	0.0112998	0.363631	0.666265	0.381677	0.385082	0.419598	0.64592	0.393857	0.390178	0.000246269	0.363631	0.422013	0.380011	0.384425	0.407995	0.416728	22	16	0	3	0.651658	1.91872	0.380499	1.49136	4	FALSE	4
spcln5_cln002638_cc1568	846	29	16	Hdac1	19.81	58.19	17,58|18,58|19,57|19,58|19,59|20,56|20,57|20,59|20,60|20,61|21,55|21,57|21,58|21,59|21,61	Hdac1-Br-1	EP	69	Neutrophil	13.8	0.953587	0.397032	0.668307	0.953587	1.52246	1.22221	1.52246	EP	0.397032	0.41643	0.00967476	0.0516438	0.600202	0.332586	0.409399	0.420465	0.423029	0.415588	0.416452	4.22298e-05	0.399189	0.423554	0.407855	0.414078	0.420452	0.42265	20	15	1	5	0.944843	2.57241	0.461735	1.47712	5	FALSE	4
spcln3_cln002647|cln002648_cc1054	846	28	22	Multiple																																											3	FALSE
spcln618_bcsplit1_cc0	846	27	16	Cebpa	30.31	35.88	29,32|29,34|29,35|29,37|29,38|30,33|30,35|30,36|30,37|31,35|31,37|31,38|31,39|32,34|32,35|32,39	Cebpa-BR	EP	100	B	0	1.0541	0.405209	0.736038	1.0541	1.54426	1.0541	1.54426	EP	0.405209	0.410676	0.000191298	0.370635	0.421157	0.384293	0.39746	0.415319	0.418446	0.405209	0.410676	0.000191298	0.370635	0.421157	0.384293	0.39746	0.415319	0.418446	27	16	0	1	0	1	0	1.44716	1	FALSE	0
spcln2_cln001731|cln003880_cc572	846	26	10	Multiple																																											2	TRUE
spcln3_cln000867_cc876	846	26	15	Cited2	57.4	31.6	55,28|55,29|56,29|57,29|57,30|57,33|57,35|57,36|58,30|58,31|58,33|58,34|59,32|59,33|60,32	Cited2-TF1.Br-1	Macrophage Ly6c+	38.5	Neutrophil	26.9	0.49135	0.483166	0.615483	0.49135	1.57878	0.149712	0.701715	EP	0.483166	0.504371	0.0110385	0.200949	0.626708	0.390732	0.415809	0.561318	0.57709	0.540637	0.541326	0.0029023	0.456218	0.626708	0.484654	0.49811	0.577124	0.593967	10	15	0	5	1.32296	3.75454	0.7008	1.43136	3	FALSE	3
spcln3_cln000876|cln000896_cc881	846	26	14	Multiple																																											3	FALSE
spcln2_cln000313_cc469	846	25	5	Rcor1	32.2	9.8	27,7|28,7|29,7|38,14|39,14	Rcor1-As-1	EP	96	DBL	4	0.714992	0.387048	0.70305	0.714992	1.32379	0.738711	1.32379	EP	0.387048	0.386599	0.000111936	0.370737	0.412721	0.373698	0.37864	0.393527	0.399981	0.387048	0.386599	0.000111936	0.370737	0.412721	0.373698	0.37864	0.393527	0.399981	24	5	0	1	0	1	0	1.41497	2	FALSE	0
spcln2_cln001879_cc577	846	25	8	Rcor1	35.25	28.62	34,28|34,30|35,28|35,29|36,27|36,28|36,29|36,30	Rcor1-As-1	Macrophage Ly6c+	92	BMP	8	0.338923	0.458735	0.458735	0.338923	0.79724	0.345788	0.79724	Macrophage Ly6c+	0.458735	0.49285	0.0149866	0.0755691	0.623154	0.335776	0.423313	0.539337	0.559184	0.458735	0.49285	0.0149866	0.0755691	0.623154	0.335776	0.423313	0.539337	0.559184	23	8	0	2	0.278769	1.3215	0.1472	1.41497	2	FALSE	2
spcln3_cln002647|cln002648_cc1058	846	25	20	Meis1	56.6	22.7	55,19|55,20|55,21|55,22|55,23|55,24|55,25|56,20|56,21|56,24|56,25|57,21|57,25|58,20|58,24|58,26|58,27|59,19|59,20|59,28	Meis1-TF1.Br-1	EP	76	DBL	12	1.02686	0.448574	0.773528	1.02686	1.78362	1.23767	1.78362	EP	0.448574	0.421772	0.00578999	0.397431	0.666625	0.415557	0.420205	0.42294	0.592681	0.419333	0.421553	4.25097e-05	0.397431	0.424179	0.41389	0.419616	0.422629	0.423205	19	20	0	2	0.398307	1.4893	0.235537	1.41497	3	FALSE	0
spcln2_cln001720_cc568	846	24	10	Multiple																																											2	FALSE
spcln3_cln002647|cln002648_cc1059	846	24	14	Meis1	51.64	24.07	49,23|50,23|50,25|51,24|51,25|51,26|52,21|52,22|52,23|52,25|53,23|53,24|53,26|54,27	Meis1-TF1.Br-1	EP	70.8	DBL	25	0.919058	0.41844	0.743629	0.919058	1.60509	1.03246	1.60509	EP	0.41844	0.411332	0.00275093	0.378595	0.619602	0.387819	0.392396	0.422441	0.423394	0.406607	0.408673	0.000244947	0.378595	0.423424	0.387721	0.390074	0.422241	0.423356	17	14	0	2	0.214559	1.23932	0.104938	1.39794	3	FALSE	0
spcln3_cln006693_cc1141	846	24	14	Gata1	59.14	18.14	57,20|58,16|58,20|59,16|59,17|59,18|59,19|59,21|60,15|60,16|60,17|60,18|60,20|60,21	Gata1-B.Br-1	EP	54.2	DBL Aggregate	41.7	0.713736	0.40413	0.713057	0.713736	1.25982	0.731164	1.0317	DBL Aggregate	0.40413	0.387035	0.00380178	0.374801	0.616153	0.378925	0.382805	0.394145	0.406165	0.387821	0.386557	8.4287e-05	0.374801	0.409973	0.378588	0.38273	0.390088	0.396923	13	14	0	2	0.257319	1.29346	0.132653	1.39794	3	FALSE	0
spcln3_cln008245_cc1191	846	24	12	NTC	64.5	41.25	62,40|63,40|63,43|64,40|64,41|64,43|65,40|65,41|65,43|66,41|66,42|67,41	NTC-Ms-3	EP	100	B	0	1.22336	0.420415	0.763659	1.22336	1.77937	1.22336	1.77937	EP	0.420415	0.420783	1.65541e-05	0.408042	0.424852	0.417157	0.41899	0.423679	0.42408	0.420415	0.420783	1.65541e-05	0.408042	0.424852	0.417157	0.41899	0.423679	0.42408	24	12	0	1	0	1	0	1.39794	3	FALSE	0
spcln4_cln000651_cc1294	846	24	15	Mbd3	51.2	57.53	50,56|50,58|50,60|51,55|51,56|51,57|51,58|51,59|51,60|51,61|52,54|52,56|52,58|52,59|53,56	Mbd3-As	Neutrophil	79.2	Macrophage Ly6c+	8.3	0.266138	0.584169	0.774339	0.266138	1.57263	0.239338	0.902398	EP	0.584169	0.595127	0.0058353	0.332523	0.670382	0.545322	0.572269	0.629982	0.650319	0.596722	0.597016	0.00498991	0.332523	0.670382	0.567482	0.588276	0.634119	0.651826	19	15	0	4	0.642858	1.90191	0.306238	1.39794	4	FALSE	1
spcln618_bcsplit0_cc3	846	24	13	Cebpa	30.77	36.54	28,38|29,37|29,38|30,38|31,34|31,35|31,37|31,38|32,34|32,35|32,36|32,37|32,38	Cebpa-BR	EP	95.8	DBL	4.2	0.920787	0.398986	0.724736	0.920787	1.54048	0.947122	1.54048	EP	0.398986	0.400094	0.000307685	0.363535	0.422552	0.376322	0.386118	0.416001	0.420037	0.398986	0.400094	0.000307685	0.363535	0.422552	0.376322	0.386118	0.416001	0.420037	23	13	0	1	0	1	0	1.39794	1	FALSE	0
spcln1_cln002370_cc218	846	23	10	Brd9	27.6	32.4	25,33|26,32|27,31|27,32|27,33|28,32|28,33|29,32|29,33|30,33	Brd9-Br	EP	95.7	DBL Aggregate	4.3	1.16734	0.409335	0.743534	1.16734	1.63285	1.17546	1.63285	EP	0.409335	0.413737	0.000202308	0.368084	0.422354	0.391754	0.400787	0.421052	0.421833	0.409335	0.413737	0.000202308	0.368084	0.422354	0.391754	0.400787	0.421052	0.421833	22	10	0	1	0	1	0	1.38021	1	FALSE	0
spcln3_cln001432_cc976	846	23	11	Multiple																																											3	FALSE
spcln5_cln000725|cln002206_cc1523	846	23	9	Multiple																																											5	FALSE
spcln2_cln000052_cc448	846	21	5	Cebpe	41.8	32.4	41,32|41,33|42,32|42,33|43,32	Cebpe-TF1.Br-1	Macrophage Ly6c+	52.4	Neutrophil	28.6	0.400316	0.382083	0.408461	0.400316	0.886412	0.503822	0.886412	Macrophage Ly6c+	0.382083	0.433295	0.0346725	0.0295676	0.574427	0.167742	0.244896	0.558452	0.56781	0.519253	0.554127	0.00544889	0.337917	0.574427	0.433295	0.503661	0.566903	0.571204	11	5	0	4	1.14452	3.14094	0.62585	1.34242	2	TRUE	2
spcln2_cln002140_cc582	846	21	15	Gltscr1	38.8	23.87	37,21|37,22|37,28|38,22|38,23|38,24|38,25|38,26|38,27|39,23|40,22|40,23|41,23|41,25|42,24	Gltscr1-As	EP	90.5	DBL	9.5	1.12821	0.412747	0.749732	1.12821	1.65916	1.16088	1.65916	EP	0.412747	0.416332	0.000151331	0.38528	0.424319	0.388832	0.411033	0.420688	0.422173	0.412747	0.416332	0.000151331	0.38528	0.424319	0.388832	0.411033	0.420688	0.422173	19	15	0	1	0	1	0	1.34242	2	FALSE	0
spcln3_cln002529_cc1029	846	21	14	Multiple																																											3	FALSE
spcln3_cln007197|cln007270_cc1155	846	21	17	Multiple																																											3	TRUE
spcln3_cln008268_cc1195	846	21	15	Multiple																																											3	FALSE
spcln4_cln002684|cln004192|cln004402_cc1392	846	21	12	Multiple																																											4	FALSE
spcln2_cln000052_cc450	846	20	13	Cebpe	38.62	33.31	37,32|37,33|38,31|38,33|38,34|38,35|39,31|39,32|39,33|39,34|39,35|40,35|41,35	Cebpe-TF1.Br-1	Neutrophil	35	Macrophage Ly6c+	30	0.541943	0.476924	0.548682	0.541943	0.993866	0.635449	0.854533	pDC	0.476924	0.504818	0.0184369	0.217217	0.686516	0.283806	0.444462	0.572143	0.608516	0.393383	0.444462	0.0144604	0.217217	0.517718	0.251128	0.298912	0.48823	0.509978	7	13	0	5	1.44755	4.25269	0.74	1.32222	2	FALSE	3
spcln2_cln004276_cc635	846	20	1	Gltscr1	49	1	49,1	Gltscr1-As	EP	100	B	0	1.09723	0.420819	0.764394	1.09723	1.56074	1.09723	1.56074	EP	0.420819	0.421791	7.06683e-06	0.414974	0.42432	0.417036	0.419117	0.42258	0.423305	0.420819	0.421791	7.06683e-06	0.414974	0.42432	0.417036	0.419117	0.42258	0.423305	20	1	0	1	0	1	0	1.32222	2	FALSE	0
spcln3_cln007123_cc1147	846	20	14	Atf7ip	45.43	36.71	44,35|44,37|44,38|44,39|45,36|45,37|45,40|46,34|46,35|46,36|46,37|46,38|47,36|48,36	Atf7ip-Br	EP	100	B	0	1.16356	0.412374	0.749053	1.16356	1.78694	1.16356	1.78694	EP	0.412374	0.418107	0.000118731	0.391619	0.423231	0.395075	0.40458	0.421054	0.422668	0.412374	0.418107	0.000118731	0.391619	0.423231	0.395075	0.40458	0.421054	0.422668	20	14	0	1	0	1	0	1.32222	3	FALSE	0
spcln618_bcsplit1_cc1	846	20	7	Cebpa	35.29	40.14	34,40|35,38|35,39|35,41|36,40|36,41|36,42	Cebpa-BR	EP	95	Macrophage MZ	5	1.13097	0.407122	0.739514	1.13097	1.51475	1.13005	1.51475	Macrophage MZ	0.407122	0.418349	0.00040691	0.34874	0.423742	0.384221	0.396304	0.420564	0.421588	0.407122	0.418349	0.00040691	0.34874	0.423742	0.384221	0.396304	0.420564	0.421588	19	7	0	2	0.198515	1.21959	0.095	1.32222	1	FALSE	0
spcln664_bcsplit0_cc0	846	20	10	Rcor1	36.1	27.7	35,27|35,28|35,29|36,26|36,27|36,28|36,29|37,26|37,29|38,28	Rcor1-As	Macrophage Ly6c+	100	B	0	-0.0001642	0.545701	0.545701	-0.0001642	0.738725	-0.0001642	0.738725	Macrophage Ly6c+	0.545701	0.542845	0.0014724	0.479324	0.62326	0.484579	0.533553	0.56747	0.596736	0.545701	0.542845	0.0014724	0.479324	0.62326	0.484579	0.533553	0.56747	0.596736	20	10	0	1	0	1	0	1.32222	2	FALSE	2
spcln3_cln003958_cc1116	846	19	12	Elk4	57.17	30.83	53,30|54,29|55,29|55,31|56,30|57,29|57,31|58,32|59,32|60,32|61,32|61,33	Elk4-TF1.Br	Neutrophil	52.6	EP	47.4	0.414534	0.532818	0.805605	0.414534	1.73532	-0.237651	-0.0825419	EP	0.532818	0.624967	0.0150538	0.384119	0.669549	0.394102	0.420118	0.643954	0.654074	0.645282	0.643954	0.000193732	0.624967	0.669549	0.629285	0.638047	0.651094	0.663729	10	12	0	2	0.691761	1.99723	0.498615	1.30103	3	FALSE	4
spcln3_cln008357_cc1216	846	19	11	Cebpa	51.64	38.82	51,37|51,38|51,39|51,40|51,41|51,42|52,37|52,38|52,40|53,37|53,38	Cebpa-BR	EP	100	B	0	1.23725	0.415725	0.755141	1.23725	1.59987	1.23725	1.59987	EP	0.415725	0.41948	8.78028e-05	0.3919	0.424744	0.401216	0.415544	0.421824	0.422148	0.415725	0.41948	8.78028e-05	0.3919	0.424744	0.401216	0.415544	0.421824	0.422148	19	11	0	1	0	1	0	1.30103	3	FALSE	0
spcln1_cln001279|cln001280_cc156	846	18	12	Multiple																																											1	FALSE
spcln3_cln000655_cc830	846	18	10	Irf8	58.8	32.1	57,34|58,32|58,33|58,34|59,31|59,33|59,34|60,29|60,30|60,31	Irf8-TF1.Br-1	EP	72.2	Neutrophil	16.7	0.889319	0.445661	0.73697	0.889319	1.8308	1.30911	1.8308	EP	0.445661	0.420164	0.00610704	0.358913	0.632261	0.39541	0.415818	0.423446	0.588006	0.415661	0.419842	0.000100477	0.390802	0.423971	0.401141	0.415818	0.420692	0.423305	13	10	0	3	0.677909	1.96975	0.380623	1.27875	3	FALSE	0
spcln5_cln002348|cln002622_cc1548	846	18	7	Multiple																																											5	FALSE
spcln2_cln002140_cc584	846	17	9	Gltscr1	40.11	18.11	38,18|39,17|39,18|40,17|40,18|41,18|41,19|41,20|42,18	Gltscr1-As	EP	100	B	0	1.07267	0.404648	0.73502	1.07267	1.62824	1.07267	1.62824	EP	0.404648	0.405205	0.000154261	0.383152	0.421673	0.387014	0.396703	0.414759	0.420237	0.404648	0.405205	0.000154261	0.383152	0.421673	0.387014	0.396703	0.414759	0.420237	17	9	0	1	0	1	0	1.25527	2	FALSE	0
spcln2_cln002418_cc595	846	17	6	Elk4	35.5	28.5	35,27|35,28|35,29|36,28|36,29|36,30	Elk4-TF1.Br-1	CMP	58.8	Macrophage Ly6c+	29.4	0.470475	0.207281	0.207281	0.470475	0.859267	0.384777	0.613507	pDC	0.207281	0.138346	0.0314192	0.0284846	0.587159	0.04473	0.0730419	0.301016	0.458698	0.118225	0.109853	0.00552703	0.0433362	0.297455	0.045845	0.0699041	0.140648	0.170136	10	6	0	4	1.00539	2.73297	0.560554	1.25527	2	TRUE	3
spcln3_cln000045_cc710	846	17	13	Rcor1	50.54	36.46	49,35|49,36|49,38|50,36|50,37|50,38|51,34|51,35|51,36|51,38|52,36|52,37|52,38	Rcor1-As-1	Macrophage Ly6c+	41.2	Neutrophil	41.2	0.245974	0.553766	0.645111	0.245974	0.93689	0.215491	0.876363	BMP	0.553766	0.559831	0.00507134	0.403761	0.664685	0.460762	0.526515	0.59825	0.6288	0.56825	0.579541	0.0017718	0.482264	0.603397	0.524218	0.559831	0.596442	0.601393	7	13	0	4	1.06992	2.91514	0.609375	1.25527	3	FALSE	3
spcln3_cln000800_cc872	846	17	11	NTC	58.27	42.55	57,41|57,42|58,41|58,42|58,43|58,44|58,45|59,41|59,43|59,45|60,41	NTC-Ms-7	Neutrophil	100	B	0	-0.0951416	0.621422	0.831939	-0.0951416	0.674863	-0.0951416	0.674863	Neutrophil	0.621422	0.63349	0.00314668	0.445908	0.673324	0.573488	0.609035	0.656889	0.663817	0.621422	0.63349	0.00314668	0.445908	0.673324	0.573488	0.609035	0.656889	0.663817	17	11	0	1	0	1	0	1.25527	3	FALSE	1
spcln3_cln001146_cc939	846	17	12	Cebpe	55.42	28	54,25|54,29|55,25|55,26|55,27|55,28|55,31|56,27|56,29|56,30|57,29|57,30	Cebpe-TF1.Br-1	Neutrophil	82.4	EP	17.6	0.102973	0.595785	0.83321	0.102973	1.73439	-0.164113	0.488666	EP	0.595785	0.637646	0.00755305	0.420519	0.664004	0.423197	0.605511	0.648043	0.653179	0.632974	0.63988	0.000855568	0.545561	0.664004	0.609459	0.630794	0.649236	0.6536	14	12	0	2	0.465999	1.59361	0.290657	1.25527	3	FALSE	1
spcln3_cln002175|cln002741|cln004230_cc1001	846	17	8	Multiple																																											3	TRUE
spcln5_cln000176|cln000238_cc1481	846	17	8	Multiple																																											5	FALSE
spcln3_cln000655_cc833	846	16	11	Irf8	52.27	34	50,33|51,33|51,34|51,35|52,34|52,35|53,32|53,33|53,34|54,35|55,36	Irf8-TF1.Br-1	EP	81.2	Neutrophil	18.8	0.792317	0.446511	0.754747	0.792317	1.44914	1.01214	1.44914	EP	0.446511	0.406107	0.00837079	0.385706	0.652188	0.395428	0.399357	0.416832	0.617052	0.404452	0.403818	0.000100557	0.385706	0.417064	0.395222	0.398562	0.416481	0.41671	13	11	0	2	0.482578	1.62025	0.304688	1.23045	3	FALSE	0
spcln3_cln000725|cln002206_cc856	846	16	11	Multiple																																											3	FALSE
spcln3_cln001078|cln001167_cc927	846	16	12	Multiple																																											3	TRUE
spcln3_cln001780_cc992	846	16	11	Setdb1	49	27.91	46,28|47,28|47,29|48,29|49,27|49,28|50,26|50,28|51,27|51,28|51,29	Setdb1-B	Neutrophil	87.5	EP	12.5	0.409522	0.481531	0.664049	0.409522	0.792571	0.434892	0.792571	Neutrophil	0.481531	0.506521	0.0102262	0.312542	0.595892	0.342936	0.361122	0.56111	0.578165	0.503924	0.526099	0.00745604	0.348864	0.595892	0.357431	0.498929	0.570055	0.578689	14	11	0	2	0.37677	1.45757	0.21875	1.23045	3	FALSE	1
spcln3_cln002563_cc1034	846	16	7	Pax5	71.29	37.57	70,37|70,38|71,38|72,36|72,37|72,38|72,39	Pax5-TF1.Br	EP	100	B	0	1.26261	0.411921	0.748231	1.26261	1.72611	1.26261	1.72611	EP	0.411921	0.416573	9.70876e-05	0.39215	0.421047	0.396046	0.407019	0.419177	0.419779	0.411921	0.416573	9.70876e-05	0.39215	0.421047	0.396046	0.407019	0.419177	0.419779	16	7	0	1	0	1	0	1.23045	3	FALSE	0
spcln4_cln000202_cc1263	846	16	10	Mbd3	65.9	63.7	63,64|64,63|64,64|65,63|65,64|66,64|67,64|68,63|68,64|69,64	Mbd3-As	Macrophage Ly6c+	56.2	CMP	12.5	0.413116	0.518797	0.533562	0.413116	0.780467	0.445879	0.780467	Neutrophil	0.518797	0.554574	0.0296427	0.142879	0.714967	0.256839	0.497023	0.632356	0.652221	0.591207	0.62233	0.00739497	0.419051	0.714967	0.512197	0.552583	0.63369	0.666417	9	10	0	6	1.36336	3.90932	0.640625	1.23045	4	FALSE	2
spcln4_cln001076|cln002640_cc1338	846	16	10	Rcor1	55.5	47.8	54,46|55,46|55,47|55,48|55,49|55,50|56,47|56,49|57,47|57,49	Rcor1-As-1	Early T	56.2	Lymphoid Progenitor	25	0.104238	0.600401	0.600401	0.104238	1.03925	0.27582	1.03925	BMP	0.600401	0.600401		0.600401	0.600401	0.600401	0.600401	0.600401	0.600401										9	10	0	4	1.02004	2.7733	0.56	1.23045	4	FALSE	3
spcln4_cln001078|cln001167_cc1341	846	16	7	Multiple																																											4	FALSE
spcln1_cln008327|cln008331_cc430	846	15	9	Multiple																																											1	FALSE
spcln2_cln000414|cln001277_cc488	846	15	8	Multiple																																											2	FALSE
spcln2_cln001432_cc553	846	15	4	Klf1	36.5	37	35,37|36,37|37,37|38,37	Klf1-TF1.Br	EP	93.3	DBL	6.7	0.825356	0.416161	0.755932	0.825356	1.48293	0.821332	1.48293	DBL	0.416161	0.419311	0.000102418	0.384297	0.423289	0.410749	0.415369	0.422242	0.422938	0.416161	0.419311	0.000102418	0.384297	0.423289	0.410749	0.415369	0.422242	0.422938	14	4	0	1	0	1	0	1.20412	2	FALSE	0
spcln2_cln008327|cln008331_cc679	846	15	9	Multiple																																											2	FALSE
spcln3_cln000045_cc711	846	15	8	Rcor1	61.12	31.62	59,29|60,30|61,31|61,32|61,33|62,32|62,33|63,33	Rcor1-As-1	Macrophage Ly6c+	73.3	Neutrophil	26.7	-0.130273	0.547853	0.600924	-0.130273	0.617565	-0.263686	0.612839	Neutrophil	0.547853	0.544525	0.00142659	0.489501	0.623664	0.502566	0.5238	0.569259	0.594848	0.533447	0.536546	0.000799081	0.489501	0.584325	0.492582	0.520035	0.551852	0.558681	11	8	0	2	0.579915	1.78589	0.391111	1.20412	3	FALSE	2
spcln3_cln000559_cc811	846	15	7	Hdac3	58.86	21.86	57,22|58,22|59,21|59,22|59,23|60,21|60,22	Hdac3-Br-1	Neutrophil	93.3	cDC	6.7	0.45358	0.571877	0.76561	0.45358	0.997342	0.445558	0.997342	cDC	0.571877	0.585835	0.00755513	0.284088	0.651545	0.567938	0.573532	0.590042	0.63777	0.571877	0.585835	0.00755513	0.284088	0.651545	0.567938	0.573532	0.590042	0.63777	14	7	0	2	0.24493	1.27753	0.124444	1.20412	3	FALSE	1
spcln3_cln002205_cc1010	846	15	7	Multiple																																											3	FALSE
spcln3_cln008357_cc1217	846	15	10	Cebpa	54.7	39.1	53,42|54,41|55,35|55,36|55,37|55,38|55,39|55,40|55,41|55,42	Cebpa-BR	EP	100	B	0	1.17079	0.411213	0.746946	1.17079	1.62795	1.17079	1.62795	EP	0.411213	0.418243	0.000280003	0.374107	0.42299	0.381648	0.413265	0.420992	0.422708	0.411213	0.418243	0.000280003	0.374107	0.42299	0.381648	0.413265	0.420992	0.422708	15	10	0	1	0	1	0	1.20412	3	FALSE	0
spcln3_cln008851_cc1240	846	15	10	Hhex	51.5	38.3	50,37|50,38|51,38|51,39|51,40|52,36|52,37|52,40|53,38|53,40	Hhex-TF1.Br	EP	86.7	Neutrophil	13.3	0.932332	0.44333	0.76507	0.932332	1.63387	1.10356	1.63387	EP	0.44333	0.417541	0.0059392	0.39616	0.649036	0.401916	0.41475	0.421994	0.537597	0.414398	0.415825	7.61697e-05	0.39616	0.423388	0.400076	0.414575	0.420037	0.42245	13	10	0	2	0.392674	1.48094	0.231111	1.20412	3	FALSE	0
spcln4_cln002405_cc1369	846	15	7	Cited4	61.71	45.86	60,46|61,45|61,46|61,47|62,46|63,46|64,45	Cited4-TF1.Br-1	Neutrophil	60	EP	40	0.450524	0.431058	0.648232	0.450524	0.772288	0.418353	0.772288	EP	0.431058	0.380848	0.0368783	0.036201	0.640004	0.1727	0.370169	0.583406	0.617545	0.470194	0.581448	0.0602111	0.036201	0.640004	0.0426923	0.552282	0.599215	0.631813	9	7	0	2	0.673012	1.96013	0.48	1.20412	4	FALSE	4
spcln4_cln003567|cln003692_cc1400	846	15	10	Multiple																																											4	FALSE
spcln5_cln001440_cc1533	846	15	8	Elk4																																											5	FALSE	2
spcln1_cln001202|cln001289_cc137	846	14	10	Multiple																																											1	FALSE
spcln1_cln002347_cc216	846	14	10	Men1	26.4	32.2	24,31|24,32|25,32|25,34|26,31|26,33|27,32|28,32|29,32|30,33	Men1-As	EP	92.9	Neutrophil	7.1	0.985929	0.41368	0.736451	0.985929	1.42938	1.00875	1.42938	EP	0.41368	0.41898	0.000226303	0.390022	0.438929	0.391229	0.401708	0.42224	0.423667	0.411738	0.418263	0.000187952	0.390022	0.423791	0.391224	0.39702	0.421563	0.423195	13	10	0	2	0.257319	1.29346	0.132653	1.17609	1	FALSE	0
spcln2_cln001289_cc540	846	14	11	Multiple																																											2	FALSE
spcln3_cln008277|cln008281_cc1196	846	14	10	Multiple																																											3	FALSE
spcln4_cln001726|cln001732_cc1359	846	14	9	Cited4	51.22	53.56	50,52|50,53|50,54|51,53|51,54|51,55|52,54|53,53|53,54	Cited4-TF1.Br	Neutrophil	85.7	pDC	14.3	-0.129827	0.623583	0.834833	-0.129827	0.732987	-0.146989	0.732987	pDC	0.623583	0.628192	0.000641379	0.584865	0.667856	0.593356	0.60271	0.642782	0.645053	0.623583	0.628192	0.000641379	0.584865	0.667856	0.593356	0.60271	0.642782	0.645053	12	9	0	2	0.410116	1.50699	0.244898	1.17609	4	FALSE	1
spcln4_cln007123_cc1419	846	14	2	Atf7ip	51	65.5	51,65|51,66	Atf7ip-Br	EP	92.9	Macrophage MZ	7.1	1.23459	0.417758	0.758833	1.23459	1.6703	1.23514	1.6703	EP	0.417758	0.41885	4.17829e-05	0.400903	0.424482	0.41211	0.415008	0.421857	0.423815	0.417758	0.41885	4.17829e-05	0.400903	0.424482	0.41211	0.415008	0.421857	0.423815	13	2	0	2	0.257319	1.29346	0.132653	1.17609	4	FALSE	0
spcln5_cln000677|cln000832_cc1521	846	14	2	Hhex	12	75.5	12,75|12,76	Hhex-TF1.Br	Neutrophil	78.6	EP	21.4	-0.117087	0.596135	0.837337	-0.117087	0.735089	-0.304705	-0.143358	EP	0.596135	0.651128	0.013409	0.383106	0.672075	0.38363	0.636322	0.659231	0.668315	0.654136	0.656731	0.000162715	0.636187	0.672075	0.636725	0.644453	0.662888	0.669286	11	2	0	2	0.51958	1.68132	0.336735	1.17609	5	FALSE	1
spcln1_cln000020_cc2	846	13	10	Rcor1	20	32.4	19,33|19,34|19,35|20,31|20,32|20,33|20,35|21,28|21,29|21,34	Rcor1-As	Macrophage Ly6c+	76.9	DBL	7.7	-0.453685	0.507707	0.507707	-0.453685	-0.309525	-0.430411	-0.309525	Macrophage Ly6c+	0.507707	0.511154	0.000576164	0.46576	0.544949	0.472682	0.499979	0.522999	0.527266	0.507707	0.511154	0.000576164	0.46576	0.544949	0.472682	0.499979	0.522999	0.527266	10	10	0	3	0.566086	1.76136	0.291667	1.14613	1	FALSE	2
spcln1_cln000722_cc93	846	13	9	Kmt2a	19	31.33	17,31|17,32|18,32|18,33|19,32|20,30|20,31|21,30|21,31	Kmt2a-Br	EP	100	B	0	1.26517	0.419245	0.761534	1.26517	1.55432	1.26517	1.55432	EP	0.419245	0.419623	1.06605e-05	0.412388	0.423541	0.415147	0.417589	0.422056	0.42248	0.419245	0.419623	1.06605e-05	0.412388	0.423541	0.415147	0.417589	0.422056	0.42248	13	9	0	1	0	1	0	1.14613	1	FALSE	0
spcln1_cln001066_cc116	846	13	10	Cebpb	25.1	39.2	24,38|24,40|25,37|25,38|25,39|25,41|25,42|25,43|26,37|27,37	Cebpb-TF1.Br	EP	100	B	0	1.38875	0.419982	0.762874	1.38875	1.71483	1.38875	1.71483	EP	0.419982	0.420452	5.79916e-06	0.415023	0.423386	0.417346	0.418711	0.420655	0.42305	0.419982	0.420452	5.79916e-06	0.415023	0.423386	0.417346	0.418711	0.420655	0.42305	13	10	0	1	0	1	0	1.14613	1	FALSE	0
spcln1_cln004300|cln004398_cc317	846	13	10	Multiple																																											1	FALSE
spcln2_cln003948|cln003961_cc634	846	13	4	Irf8	30.25	19.5	29,19|30,20|31,19|31,20	Irf8-TF1.Br-1	Neutrophil	53.8	DBL	23.1	0.0340543	0.619188	0.828948	0.0340543	0.674888	-0.148341	-0.0144263	DBL	0.619188	0.616494	0.000414291	0.599615	0.657237	0.600907	0.603564	0.62692	0.641499	0.619188	0.616494	0.000414291	0.599615	0.657237	0.600907	0.603564	0.62692	0.641499	7	4	0	3	0.801819	2.22959	0.46	1.14613	2	FALSE	1
spcln3_cln001202|cln001289_cc941	846	13	10	Hdac1	53.1	43.3	51,44|51,45|52,43|53,42|53,43|53,44|54,42|54,43|55,43|55,44	Hdac1-Br	EP	84.6	DBL	7.7	0.898293	0.399311	0.725326	0.898293	1.49382	0.956302	1.49382	EP	0.399311	0.399084	0.000149273	0.384517	0.417973	0.385364	0.388783	0.408255	0.415108	0.399311	0.399084	0.000149273	0.384517	0.417973	0.385364	0.388783	0.408255	0.415108	11	10	0	2	0.286836	1.33221	0.152778	1.14613	3	FALSE	0
spcln4_cln000443_cc1286	846	13	4	Cited4	55	48.5	54,48|55,48|55,49|56,49	Cited4-TF1.Br	Neutrophil	92.3	Macrophage Ly6c+	7.7	0.587458	0.489006	0.639707	0.587458	0.880614	0.603985	0.880614	Neutrophil	0.489006	0.537308	0.0150706	0.244218	0.598885	0.282159	0.445627	0.57214	0.588965	0.481923	0.535276	0.0157291	0.244218	0.598885	0.272256	0.424566	0.562124	0.590649	12	4	0	2	0.271189	1.31152	0.142012	1.14613	4	FALSE	1
spcln4_cln001406_cc1355	846	13	9	NTC	55.22	63.56	54,63|55,61|55,63|55,64|55,65|55,66|55,67|56,62|57,61	NTC-Ms-3	Neutrophil	61.5	Macrophage Ly6c+	23.1	0.308783	0.544905	0.679982	0.308783	0.893147	0.552165	0.893147	Neutrophil	0.544905	0.561146	0.00339664	0.416481	0.64309	0.505729	0.518978	0.575477	0.588197	0.548255	0.562798	0.00460897	0.416481	0.64309	0.478954	0.517716	0.585977	0.604665	8	9	0	4	1.03177	2.80602	0.556213	1.14613	4	FALSE	1
spcln4_cln007228_cc1435	846	13	11	Cebpa	76.27	54.36	74,54|75,53|75,55|76,54|76,56|76,57|77,53|77,54|77,55|78,53|78,54	Cebpa-BR	EP	92.3	DBL	7.7	1.01795	0.403554	0.733032	1.01795	1.58196	1.03691	1.58196	EP	0.403554	0.406794	0.000316727	0.377476	0.422738	0.380639	0.388447	0.421728	0.422021	0.403554	0.406794	0.000316727	0.377476	0.422738	0.380639	0.388447	0.421728	0.422021	12	11	0	1	0	1	0	1.14613	4	FALSE	0
spcln5_cln000202_cc1484	846	13	9	Mbd3	19.56	57.22	18,56|18,58|19,56|19,57|19,58|20,57|20,58|21,58|22,57	Mbd3-As	Neutrophil	46.2	Macrophage Ly6c+	30.8	0.0439275	0.582337	0.704728	0.0439275	0.557762	-0.289498	-0.250737	DBL	0.582337	0.642656	0.0329315	0.0474498	0.675205	0.569381	0.587236	0.665773	0.672164	0.662353	0.665773	0.000155629	0.642656	0.675205	0.647603	0.655318	0.671104	0.673684	6	9	0	4	1.12693	3.08616	0.625	1.14613	5	TRUE	1
spcln1_cln000508|cln000565_cc76	846	12	7	Multiple																																											1	FALSE
spcln1_cln002393_cc225	846	12	9	Atf7ip	19.56	22.89	18,21|18,22|19,22|19,24|19,25|20,23|21,22|21,23|21,24	Atf7ip-Br-1	Macrophage Ly6c+	50	Neutrophil	33.3	0.447811	0.44163	0.522297	0.447811	0.714062	0.366798	0.714062	Neutrophil	0.44163	0.461943	0.0220087	0.247068	0.616421	0.263587	0.306771	0.572362	0.588642	0.5787	0.575393	0.000504298	0.555305	0.616421	0.557775	0.562517	0.587444	0.602931	6	9	0	3	1.0114	2.74946	0.611111	1.11394	1	FALSE	2
spcln1_cln005069|cln007126|cln008372_cc336	846	12	4	Multiple																																											1	FALSE
spcln1_cln007199_cc378	846	12	10	Wdr82	6.6	36.7	5,36|5,38|6,35|6,36|6,38|7,34|7,37|7,38|8,38|9,37	Wdr82-Br-1	Neutrophil	75	EP	25	0.632599	0.43356	0.626212	0.632599	1.05923	0.65551	1.05923	Neutrophil	0.43356	0.443791	0.00606653	0.311977	0.529237	0.325	0.3828	0.495387	0.524937	0.450306	0.474706	0.00697577	0.311977	0.529237	0.319251	0.412896	0.511921	0.526954	9	10	0	2	0.562335	1.75477	0.375	1.11394	1	FALSE	1
spcln1_cln008213_cc412	846	12	2	Hdac3	23	32.5	23,32|23,33	Hdac3-Br-1	Neutrophil	100	B	0	0.560451	0.566361	0.758225	0.560451	0.807786	0.560451	0.807786	Neutrophil	0.566361	0.585587	0.00289799	0.435418	0.623151	0.496313	0.552839	0.591011	0.613566	0.566361	0.585587	0.00289799	0.435418	0.623151	0.496313	0.552839	0.591011	0.613566	12	2	0	1	0	1	0	1.11394	1	FALSE	1
spcln1_cln008247_cc416	846	12	6	NTC	17.67	20.33	17,19|17,20|17,21|18,20|18,21|19,21	NTC-Ms-4	EP	91.7	DBL	8.3	1.19296	0.418291	0.759801	1.19296	1.46455	1.20578	1.46455	EP	0.418291	0.418986	9.72881e-06	0.412831	0.421584	0.413485	0.416458	0.421057	0.421371	0.418291	0.418986	9.72881e-06	0.412831	0.421584	0.413485	0.416458	0.421057	0.421371	11	6	0	1	0	1	0	1.11394	1	FALSE	0
spcln2_cln000052_cc452	846	12	9	Cebpe	36.11	28.44	35,27|35,29|35,30|36,27|36,28|36,29|37,28|37,29|38,29	Cebpe-TF1.Br-1	Early T	25	pDC	25	0.664138	0.368201	0.461329	0.664138	1.59566	0.821719	1.16582	EP	0.368201	0.458872	0.0592626	0.0283202	0.634467	0.0683698	0.186599	0.514342	0.57736										3	9	0	6	1.70455	5.49892	0.805556	1.11394	2	TRUE	3
spcln3_cln000202_cc747	846	12	7	Mbd3	58.14	38.29	57,38|57,39|58,37|58,38|59,37|59,39|59,40	Mbd3-As	Macrophage Ly6c+	50	Neutrophil	25	0.220422	0.545969	0.601881	0.220422	0.813353	0.327487	0.813353	cDC	0.545969	0.602135	0.0197269	0.204375	0.663179	0.41663	0.548604	0.617853	0.644985	0.571386	0.57938	0.00366939	0.469694	0.640436	0.509149	0.550609	0.608651	0.62563	6	7	0	4	1.12095	3.06777	0.61157	1.11394	3	FALSE	2
spcln3_cln000660_cc837	846	12	4	Mbd2	74	24	73,25|74,23|74,24|75,24	Mbd2-Br	Neutrophil	83.3	EP	8.3	0.308272	0.558704	0.74477	0.308272	0.662555	0.237551	0.640295	Macrophage Ly6c+	0.558704	0.617799	0.0171949	0.324438	0.680157	0.353303	0.507974	0.649532	0.666991	0.567624	0.617799	0.016461	0.324438	0.680157	0.347794	0.555202	0.650491	0.669798	10	4	0	3	0.566086	1.76136	0.291667	1.11394	3	FALSE	1
spcln3_cln001087_cc933	846	12	7	Gltscr1	54.86	28.43	53,28|54,28|54,29|55,29|56,27|56,28|56,30	Gltscr1-As	Macrophage Ly6c+	75	DBL	16.7	0.185211	0.382833	0.382833	0.185211	0.644805	0.217171	0.644805	Macrophage Ly6c+	0.382833	0.53622	0.0659261	0.0314632	0.617883	0.0819122	0.103456	0.590121	0.609101	0.421874	0.53699	0.0570196	0.0875177	0.617883	0.0904982	0.140094	0.590462	0.610077	9	7	0	2	0.325083	1.38415	0.18	1.11394	3	FALSE	2
spcln4_cln000202_cc1265	846	12	8	Mbd3	67.75	59.5	66,60|67,60|67,61|68,58|68,60|68,61|69,57|69,59	Mbd3-As	Macrophage Ly6c+	58.3	DC	16.7	0.239337	0.542399	0.574149	0.239337	0.769044	0.281212	0.769044	Neutrophil	0.542399	0.579779	0.00891751	0.308564	0.618903	0.460916	0.534931	0.586128	0.598665	0.576871	0.585759	0.00138115	0.499004	0.618903	0.544554	0.57735	0.589867	0.603724	7	8	0	4	1.11874	3.06101	0.597222	1.11394	4	FALSE	2
spcln4_cln007228_cc1434	846	12	3	Cebpa	72	51	72,50|72,51|72,52	Cebpa-BR	EP	100	B	0	1.22443	0.412788	0.749806	1.22443	1.49997	1.22443	1.49997	EP	0.412788	0.41662	0.00013177	0.386506	0.422071	0.39428	0.41206	0.419683	0.421484	0.412788	0.41662	0.00013177	0.386506	0.422071	0.39428	0.41206	0.419683	0.421484	12	3	0	1	0	1	0	1.11394	4	FALSE	0
spcln5_cln002526|cln002649_cc1559	846	12	8	Rcor1	17.5	63.88	16,65|17,62|17,64|17,65|18,62|18,63|18,65|19,65	Rcor1-As-1	Macrophage Ly6c+	100	B	0	-0.289384	0.523594	0.523594	-0.289384	0.448452	-0.289384	0.448452	Macrophage Ly6c+	0.523594	0.527479	0.00172935	0.460835	0.577179	0.46705	0.489677	0.555972	0.57057	0.523594	0.527479	0.00172935	0.460835	0.577179	0.46705	0.489677	0.555972	0.57057	12	8	0	1	0	1	0	1.11394	5	FALSE	2
spcln655_cc1	846	12	5	NTC	25.2	46.8	24,46|24,47|25,47|26,47|27,47	NTC-Ms-7	EP	100	B	0	1.26543	0.414732	0.753338	1.26543	1.54765	1.26543	1.54765	EP	0.414732	0.41692	0.000116521	0.385418	0.423628	0.405066	0.413981	0.421981	0.422694	0.414732	0.41692	0.000116521	0.385418	0.423628	0.405066	0.413981	0.421981	0.422694	12	5	0	1	0	1	0	1.11394	1	FALSE	0
spcln2_cln002398_cc590	846	11	6	Cited2	48	17.33	47,16|48,16|48,17|48,18|48,19|49,18	Cited2-TF1.Br	Macrophage Ly6c+	54.5	DC	18.2	0.278415	0.580526	0.63198	0.278415	0.653863	0.334142	0.653618	DC	0.580526	0.576297	0.00126974	0.544801	0.65936	0.552451	0.555989	0.587277	0.610049	0.57152	0.576297	0.000314361	0.544801	0.588916	0.550438	0.560016	0.585237	0.587824	6	6	0	4	1.16852	3.21722	0.628099	1.07918	2	FALSE	2
spcln3_cln000295_cc776	846	11	9	Cited4	59.22	27.67	58,30|58,31|59,26|59,27|59,28|59,29|60,25|60,26|61,27	Cited4-TF1.Br	Neutrophil	72.7	EP	18.2	0.587265	0.501303	0.690639	0.587265	1.62237	0.444399	0.969186	EP	0.501303	0.506327	0.0101021	0.285979	0.630987	0.423327	0.447892	0.568031	0.619064	0.513353	0.522613	0.0120308	0.285979	0.630987	0.416348	0.476486	0.586342	0.622641	8	9	0	3	0.759547	2.13731	0.429752	1.07918	3	FALSE	1
spcln4_cln001406_cc1354	846	11	2	NTC	51.5	66	51,66|52,66	NTC-Ms-3	Neutrophil	54.5	Macrophage Ly6c+	45.5	0.49493	0.574706	0.678295	0.49493	0.761673	0.481322	0.738908	Macrophage Ly6c+	0.574706	0.578095	0.00466524	0.399386	0.66224	0.548937	0.556804	0.619424	0.62796	0.560603	0.576342	0.00703601	0.399386	0.62796	0.479077	0.562193	0.613667	0.626388	6	2	0	2	0.689009	1.99174	0.495868	1.07918	4	FALSE	1
spcln5_cln000108_cc1473	846	11	11	Rcor1	22.91	73.09	20,73|21,73|22,71|22,73|23,72|23,73|23,75|24,73|24,74|25,73|25,74	Rcor1-As	Macrophage Ly6c+	90.9	CMP	9.1	0.378389	0.532435	0.532435	0.378389	0.952343	0.37629	0.952343	CMP	0.532435	0.583337	0.0293475	0.035757	0.638521	0.482498	0.54655	0.623704	0.628854	0.582103	0.584194	0.00245739	0.482498	0.638521	0.526907	0.56151	0.624016	0.629821	10	11	0	2	0.304636	1.35613	0.165289	1.07918	5	FALSE	2
spcln618_bcsplit0_cc0	846	11	6	Cebpa	28	31.67	27,31|27,32|28,30|28,32|29,32|29,33	Cebpa-BR	EP	100	B	0	1.13061	0.407533	0.74026	1.13061	1.56565	1.13061	1.56565	EP	0.407533	0.408892	0.00013178	0.384882	0.421304	0.396202	0.401427	0.416507	0.421226	0.407533	0.408892	0.00013178	0.384882	0.421304	0.396202	0.401427	0.416507	0.421226	11	6	0	1	0	1	0	1.07918	1	FALSE	0
spcln1_cln000508|cln000565_cc77	846	10	8	Multiple																																											1	FALSE
spcln1_cln000651_cc84	846	10	8	Mbd3	30.5	37.5	29,38|29,40|30,38|30,39|31,36|31,37|32,35|32,37	Mbd3-As	Neutrophil	60	Macrophage Ly6c+	20	0.0866123	0.571408	0.747405	0.0866123	0.914796	0.0441872	0.765565	EP	0.571408	0.606965	0.00605424	0.405162	0.648012	0.492715	0.523658	0.615505	0.642203	0.616541	0.611671	0.000613508	0.580175	0.648012	0.59357	0.607183	0.634439	0.644381	6	8	0	3	0.848686	2.33657	0.493827	1.04139	1	FALSE	1
spcln1_cln001432_cc174	846	10	6	Klf1	31.33	40.17	30,41|31,38|31,39|31,40|32,41|33,42	Klf1-TF1.Br	EP	70	Neutrophil	30	0.807572	0.491181	0.797498	0.807572	1.73032	1.25819	1.73032	EP	0.491181	0.419606	0.0137527	0.416293	0.675285	0.416569	0.418042	0.591941	0.66006	0.418459	0.418174	3.41943e-06	0.416293	0.420936	0.416477	0.417299	0.419606	0.42091	7	6	0	2	0.610864	1.84202	0.42	1.04139	1	FALSE	4
spcln1_cln002140_cc200	846	10	8	Gltscr1	14.62	43.25	13,45|14,44|15,40|15,41|15,42|15,43|15,45|15,46	Gltscr1-As	EP	100	B	0	1.16271	0.407008	0.739307	1.16271	1.66286	1.16271	1.66286	EP	0.407008	0.411783	0.000244671	0.379081	0.423418	0.384481	0.399303	0.418628	0.422196	0.407008	0.411783	0.000244671	0.379081	0.423418	0.384481	0.399303	0.418628	0.422196	10	8	0	1	0	1	0	1.04139	1	FALSE	0
spcln1_cln005069|cln007126|cln008372_cc334	846	10	8	Multiple																																											1	FALSE
spcln1_cln005069|cln007126|cln008372_cc342	846	10	7	Multiple																																											1	FALSE
spcln1_cln005069|cln007126|cln008372_cc348	846	10	3	Multiple																																											1	FALSE
spcln2_cln000234|cln000432|cln000664_cc462	846	10	4	NTC	38	35.75	37,35|38,35|38,36|39,37	NTC-Ms-5	EP	100	B	0	0.732444	0.393471	0.714718	0.732444	1.12399	0.732444	1.12399	EP	0.393471	0.392654	7.29971e-05	0.384277	0.413108	0.384862	0.386668	0.396744	0.399336	0.393471	0.392654	7.29971e-05	0.384277	0.413108	0.384862	0.386668	0.396744	0.399336	10	4	0	1	0	1	0	1.04139	2	FALSE	0
spcln2_cln001289_cc539	846	10	7	Hdac1	35	33.14	34,32|34,33|34,34|35,34|36,32|36,33|36,34	Hdac1-Br	EP	70	DBL	20	0.899797	0.428212	0.718088	0.899797	1.4366	1.06547	1.4366	EP	0.428212	0.412749	0.00413194	0.393215	0.585317	0.394304	0.394968	0.415923	0.466756	0.405768	0.409767	0.000119254	0.393215	0.415944	0.394149	0.394903	0.415824	0.415927	7	7	0	2	0.37677	1.45757	0.21875	1.04139	2	FALSE	0
spcln2_cln002481_cc600	846	10	8	Cebpa	27.88	24.12	26,23|27,22|27,23|28,24|28,26|29,24|29,25|29,26	Cebpa-BR	EP	100	B	0	0.745124	0.38385	0.697243	0.745124	1.71202	0.745124	1.71202	EP	0.38385	0.376305	0.000428093	0.367799	0.422677	0.369828	0.371224	0.380387	0.421957	0.38385	0.376305	0.000428093	0.367799	0.422677	0.369828	0.371224	0.380387	0.421957	10	8	0	1	0	1	0	1.04139	2	FALSE	0
spcln3_cln000168|cln000196|cln000272_cc741	846	10	6	Multiple																																											3	FALSE
spcln3_cln000414|cln001277_cc798	846	10	4	Multiple																																											3	FALSE
spcln3_cln000717|cln000723_cc855	846	10	8	Multiple																																											3	FALSE
spcln3_cln001054_cc916	846	10	4	NTC	55	38.5	55,37|55,38|55,39|55,40	NTC-Ms-6	EP	100	B	0	1.33533	0.421404	0.765457	1.33533	1.72683	1.33533	1.72683	EP	0.421404	0.421603	9.02403e-06	0.416379	0.425775	0.418268	0.419165	0.423627	0.424882	0.421404	0.421603	9.02403e-06	0.416379	0.425775	0.418268	0.419165	0.423627	0.424882	10	4	0	1	0	1	0	1.04139	3	FALSE	0
spcln3_cln002405_cc1020	846	10	3	Cited4	58	45	57,45|58,45|59,45	Cited4-TF1.Br-1	Neutrophil	90	EP	10	0.261756	0.516844	0.70733	0.261756	0.862499	0.290418	0.862499	Neutrophil	0.516844	0.577973	0.0242423	0.145068	0.615845	0.30459	0.572867	0.586081	0.612778	0.538459	0.579046	0.0220168	0.145068	0.615845	0.487007	0.573994	0.586989	0.613119	9	3	0	2	0.325083	1.38415	0.18	1.04139	3	FALSE	1
spcln3_cln003377_cc1075	846	10	5	NTC	55.6	25.4	55,25|55,26|55,27|56,24|57,25	NTC-Ms-7	EP	90	Neutrophil	10	1.0281	0.432289	0.754538	1.0281	1.52752	1.17551	1.52752	EP	0.432289	0.416533	0.0056714	0.386127	0.642503	0.388487	0.39689	0.422832	0.4462	0.408932	0.416167	0.000242856	0.386127	0.424389	0.388225	0.391433	0.419385	0.424063	9	5	0	2	0.325083	1.38415	0.18	1.04139	3	FALSE	0
spcln3_cln003612_cc1102	846	10	5	NTC	47.4	34.8	47,34|47,35|47,36|48,34|48,35	NTC-Ms-5	EP	80	Neutrophil	20	0.687608	0.467509	0.787239	0.687608	1.42697	0.964495	1.42697	EP	0.467509	0.423061	0.00918215	0.419537	0.666422	0.420523	0.420932	0.42471	0.634326	0.422238	0.422101	3.73501e-06	0.419537	0.424751	0.420304	0.420705	0.423744	0.424637	8	5	0	2	0.500402	1.64938	0.32	1.04139	3	FALSE	0
spcln3_cln008361|cln008363_cc1229	846	10	7	Multiple																																											3	FALSE
spcln4_cln000321_cc1274	846	10	7	Pax5	53.14	48.86	51,48|51,49|52,49|53,49|54,49|55,49|56,49	Pax5-TF1.Br-1	EP	50	Neutrophil	50	0.902298	0.500293	0.768018	0.902298	1.62757	1.30586	1.62757	EP	0.500293	0.489439	0.00947024	0.391536	0.651857	0.410269	0.41386	0.576834	0.596141	0.411334	0.412812	0.000140661	0.391536	0.422967	0.399862	0.412351	0.417004	0.420582	5	7	0	2	0.693147	2	0.5	1.04139	4	FALSE	4
spcln4_cln000670_cc1311	846	10	4	NTC	71.5	50.25	71,50|71,51|72,49|72,51	NTC-Ms-3	EP	100	B	0	1.22165	0.413978	0.751968	1.22165	1.56115	1.22165	1.56115	EP	0.413978	0.419818	0.000243314	0.376888	0.425347	0.394132	0.414854	0.423365	0.425099	0.413978	0.419818	0.000243314	0.376888	0.425347	0.394132	0.414854	0.423365	0.425099	10	4	0	1	0	1	0	1.04139	4	FALSE	0
spcln4_cln000867_cc1334	846	10	7	Cited2	58	54.29	57,54|57,55|58,53|58,54|58,55|59,54|59,55	Cited2-TF1.Br-1	Macrophage Ly6c+	90	Neutrophil	10	0.120987	0.535633	0.555345	0.120987	0.80878	0.0578934	0.80878	Neutrophil	0.535633	0.534063	0.00118256	0.486915	0.586694	0.49598	0.509949	0.557884	0.582347	0.530496	0.532115	0.00103353	0.486915	0.586694	0.494973	0.508044	0.55229	0.565138	9	7	0	2	0.325083	1.38415	0.18	1.04139	4	FALSE	2
spcln4_cln002903_cc1394	846	10	6	Atf4	72.17	56.83	71,56|71,57|72,57|72,58|73,57|74,56	Atf4-TF1.Br	EP	100	B	0	1.12866	0.406997	0.739287	1.12866	1.73052	1.12866	1.73052	EP	0.406997	0.408729	0.000178727	0.37567	0.419556	0.395104	0.402497	0.417537	0.418958	0.406997	0.408729	0.000178727	0.37567	0.419556	0.395104	0.402497	0.417537	0.418958	10	6	0	1	0	1	0	1.04139	4	FALSE	0
spcln5_cln000574_cc1509	846	10	5	Phf10	29	73	29,71|29,72|29,73|29,74|29,75	Phf10-As	EP	100	B	0	1.00754	0.400987	0.728369	1.00754	1.60875	1.00754	1.60875	EP	0.400987	0.399179	0.00015499	0.385321	0.418468	0.388913	0.389949	0.411817	0.417073	0.400987	0.399179	0.00015499	0.385321	0.418468	0.388913	0.389949	0.411817	0.417073	10	5	0	1	0	1	0	1.04139	5	FALSE	0
spcln5_cln001358|cln003845_cc1532	846	10	8	Cited4	14.25	57.12	13,58|14,55|14,56|14,57|14,59|15,56|15,57|15,59	Cited4-TF1.Br	EP	90	Macrophage Ly6c+	10	0.668126	0.386557	0.674102	0.668126	1.03285	0.691761	1.03285	EP	0.386557	0.385347	0.000328311	0.343643	0.412593	0.377595	0.382222	0.396814	0.401487	0.391325	0.386582	0.000113579	0.381368	0.412593	0.381771	0.383272	0.397691	0.402721	9	8	0	2	0.325083	1.38415	0.18	1.04139	5	FALSE	0
spcln618_bcsplit0_cc2	846	10	9	Cebpa	25.44	33.89	24,32|24,34|24,35|25,32|25,33|26,34|27,34|27,35|27,36	Cebpa-BR	EP	90	MEP	10	0.954108	0.384864	0.678421	0.954108	1.76889	1.05299	1.76889	EP	0.384864	0.397188	0.0024739	0.253089	0.418692	0.356438	0.382136	0.416443	0.418378	0.399506	0.405774	0.000371382	0.367922	0.418692	0.37892	0.383533	0.417378	0.418413	9	9	0	2	0.325083	1.38415	0.18	1.04139	1	FALSE	0
spcln1_cln000020_cc1	846	9	9	Rcor1	25.89	37	18,37|19,37|20,38|21,38|22,37|33,35|33,36|33,37|34,38	Rcor1-As	Macrophage Ly6c+	66.7	pDC	22.2	-0.147213	0.507049	0.507049	-0.147213	0.653235	-0.21927	0.653235	DC	0.507049	0.506601	0.00146463	0.466655	0.560866	0.467209	0.473382	0.531096	0.547337	0.507049	0.506601	0.00146463	0.466655	0.560866	0.467209	0.473382	0.531096	0.547337	6	9	0	3	0.848686	2.33657	0.493827	1	1	FALSE	2
spcln1_cln000024_cc4	846	9	6	NTC	1	33	0,32|1,32|1,33|1,34|1,35|2,32	NTC-Ms-2	EP	55.6	Neutrophil	44.4	0.545804	0.504877	0.783521	0.545804	1.25249	1.05753	1.25249	EP	0.504877	0.414628	0.0141399	0.399733	0.662777	0.400812	0.401647	0.612684	0.638312	0.405493	0.401647	4.3681e-05	0.399733	0.414628	0.400273	0.401082	0.410377	0.412928	5	6	0	2	0.686962	1.98767	0.493827	1	1	FALSE	4
spcln1_cln000202_cc31	846	9	6	Mbd3	17.67	45.67	17,44|17,45|17,46|18,45|18,47|19,47	Mbd3-As	Neutrophil	55.6	Macrophage Ly6c+	33.3	0.0288395	0.617822	0.752898	0.0288395	0.736204	-0.115756	0.692641	Macrophage Ly6c+	0.617822	0.620754	0.00199923	0.526769	0.671046	0.578291	0.600769	0.6496	0.658957	0.637965	0.648208	0.00082753	0.600901	0.671046	0.606898	0.615893	0.653776	0.664138	5	6	0	3	0.936888	2.55203	0.567901	1	1	FALSE	1
spcln1_cln001066_cc121	846	9	8	Cebpb	2	31.88	1,31|1,32|1,34|2,32|2,33|3,30|3,31|3,32	Cebpb-TF1.Br	EP	100	B	0	1.30158	0.420105	0.763097	1.30158	1.56657	1.30158	1.56657	EP	0.420105	0.420286	9.27711e-06	0.415504	0.424652	0.417116	0.417526	0.422563	0.422988	0.420105	0.420286	9.27711e-06	0.415504	0.424652	0.417116	0.417526	0.422563	0.422988	9	8	0	1	0	1	0	1	1	FALSE	0
spcln1_cln001255|cln003625|cln003641_cc147	846	9	6	Multiple																																											1	FALSE
spcln1_cln001479_cc176	846	9	7	Chd4	13.86	40.14	12,40|13,41|14,39|14,40|14,41|15,39|15,41	Chd4-As	EP	88.9	MEP	11.1	0.64073	0.358577	0.627834	0.64073	1.22883	0.675622	1.22883	EP	0.358577	0.362391	0.00187427	0.259069	0.408231	0.326078	0.348352	0.379617	0.400527	0.371016	0.367627	0.000550643	0.34283	0.408231	0.346696	0.35352	0.384363	0.40149	8	7	0	2	0.348832	1.41741	0.197531	1	1	FALSE	0
spcln1_cln003378_cc284	846	9	6	Cebpa	18.33	37.17	17,37|17,38|18,37|19,37|19,38|20,36	Cebpa-BR	EP	100	B	0	1.14825	0.412884	0.749981	1.14825	1.52453	1.14825	1.52453	EP	0.412884	0.420357	0.000137768	0.393293	0.424368	0.396711	0.405469	0.42137	0.422797	0.412884	0.420357	0.000137768	0.393293	0.424368	0.396711	0.405469	0.42137	0.422797	9	6	0	1	0	1	0	1	1	FALSE	0
spcln1_cln003948|cln003961_cc312	846	9	6	Irf8	28	37.17	27,37|27,38|28,37|28,38|29,36|29,37	Irf8-TF1.Br-1	CMP	33.3	DBL	33.3	0.386686	0.131528	0.167147	0.386686	0.744383	0.33463	0.621305	HSC	0.131528	0.0433268	0.0470415	0.0342703	0.573916	0.0358276	0.0375342	0.0548761	0.31543	0.0401089	0.0373849	5.74134e-05	0.0342703	0.0486715	0.0348932	0.0358276	0.0430282	0.0464141	3	6	0	3	1.0114	2.74946	0.611111	1	1	TRUE	3
spcln1_cln004300|cln004398_cc316	846	9	6	Multiple																																											1	FALSE
spcln1_cln007199_cc383	846	9	5	Wdr82	1	35.2	0,34|1,34|1,35|1,36|2,37	Wdr82-Br-1	Neutrophil	77.8	Macrophage Ly6c+	22.2	0.482185	0.419285	0.526922	0.482185	0.743103	0.590074	0.743103	Neutrophil	0.419285	0.454651	0.00724179	0.265192	0.551931	0.312866	0.388142	0.459318	0.484041	0.408513	0.406021	0.0090448	0.265192	0.551931	0.300947	0.356463	0.461762	0.501013	7	5	0	2	0.529706	1.69843	0.345679	1	1	FALSE	1
spcln1_cln007367|cln008295_cc396	846	9	7	Multiple																																											1	FALSE
spcln1_cln008318|cln008332|cln008339_cc425	846	9	4	Multiple																																											1	FALSE
spcln2_cln000024_cc444	846	9	7	NTC	39.29	2	38,1|39,0|39,1|39,2|39,3|40,3|41,4	NTC-Ms-2	EP	55.6	Neutrophil	44.4	0.542246	0.530589	0.821292	0.542246	1.42977	1.14753	1.42977	EP	0.530589	0.42341	0.0180361	0.400268	0.698841	0.416801	0.422764	0.663432	0.681998	0.418116	0.422764	0.0001005	0.400268	0.42341	0.408534	0.420935	0.423202	0.423327	5	7	0	2	0.686962	1.98767	0.493827	1	2	FALSE	4
spcln2_cln002025_cc579	846	9	6	Hdac1	36.17	27.83	35,27|35,28|36,27|36,28|37,28|38,29	Hdac1-Br-1	Neutrophil	66.7	DBL	33.3	0.18305	0.616234	0.824994	0.18305	1.19982	-0.289665	-0.134109	DBL	0.616234	0.615381	0.000188224	0.594993	0.635727	0.603097	0.611657	0.622977	0.630225	0.616234	0.615381	0.000188224	0.594993	0.635727	0.603097	0.611657	0.622977	0.630225	6	6	0	1	0	1	0	1	2	FALSE	1
spcln2_cln002140_cc583	846	9	7	Gltscr1	46.14	21.71	44,22|45,22|45,23|46,22|47,22|48,20|48,21	Gltscr1-As	EP	88.9	Neutrophil	11.1	1.20272	0.43898	0.764233	1.20272	1.83795	1.38645	1.83795	EP	0.43898	0.419968	0.00489645	0.40229	0.624563	0.404488	0.416505	0.42094	0.463749	0.415782	0.418917	6.07719e-05	0.40229	0.423546	0.404213	0.413639	0.420311	0.421722	8	7	0	2	0.348832	1.41741	0.197531	1	2	FALSE	0
spcln2_cln003378_cc620	846	9	8	Cebpa	33	31.88	31,31|32,32|32,33|33,32|33,33|34,31|34,33|35,30	Cebpa-BR	EP	88.9	MEP	11.1	0.917697	0.385551	0.674149	0.917697	1.6414	0.96873	1.6414	EP	0.385551	0.402357	0.00156055	0.288611	0.421096	0.354188	0.38001	0.40684	0.411109	0.397668	0.402421	0.000273191	0.370583	0.421096	0.377182	0.387025	0.407283	0.412357	8	8	0	2	0.348832	1.41741	0.197531	1	2	FALSE	0
spcln3_cln000595|cln000596_cc818	846	9	8	Multiple																																											3	FALSE
spcln3_cln000651_cc825	846	9	7	Mbd3	50.71	27.14	50,26|50,29|51,25|51,26|51,27|51,28|51,29	Mbd3-As	EP	88.9	Neutrophil	11.1	0.743398	0.419016	0.728357	0.743398	1.27087	0.865306	1.27087	EP	0.419016	0.392212	0.00562276	0.384249	0.617266	0.384686	0.388491	0.409665	0.452194	0.394235	0.390796	0.000109449	0.384249	0.410926	0.384632	0.387567	0.398034	0.410043	8	7	0	2	0.348832	1.41741	0.197531	1	3	FALSE	0
spcln3_cln001054_cc918	846	9	6	NTC	57.5	38.83	57,37|57,39|57,40|57,41|58,38|59,38	NTC-Ms-6	EP	100	B	0	1.0003	0.417609	0.758562	1.0003	1.67037	1.0003	1.67037	EP	0.417609	0.420811	0.000133569	0.387518	0.426838	0.412181	0.418913	0.42186	0.42375	0.417609	0.420811	0.000133569	0.387518	0.426838	0.412181	0.418913	0.42186	0.42375	9	6	0	1	0	1	0	1	3	FALSE	0
spcln3_cln003801|cln007290|cln007291_cc1105	846	9	8	NTC	61.88	27.25	61,26|61,28|62,25|62,26|62,27|62,29|62,30|63,27	NTC-Ms-4	Neutrophil	66.7	DC	33.3	0.430224	0.500402	0.669922	0.430224	0.996824	0.686333	0.996824	Neutrophil	0.500402	0.538752	0.0149637	0.262617	0.594859	0.375367	0.499738	0.570214	0.587088	0.500402	0.538752	0.0149637	0.262617	0.594859	0.375367	0.499738	0.570214	0.587088	6	8	0	2	0.636514	1.88988	0.444444	1	3	FALSE	1
spcln3_cln004140|cln007124_cc1123	846	9	8	Multiple																																											3	FALSE
spcln3_cln007123_cc1146	846	9	4	Atf7ip	51.5	37.5	51,37|51,38|52,37|52,38	Atf7ip-Br	EP	100	B	0	1.2093	0.413673	0.751414	1.2093	1.59698	1.2093	1.59698	EP	0.413673	0.414687	3.09599e-05	0.404993	0.420469	0.4062	0.409486	0.417289	0.419559	0.413673	0.414687	3.09599e-05	0.404993	0.420469	0.4062	0.409486	0.417289	0.419559	9	4	0	1	0	1	0	1	3	FALSE	0
spcln3_cln007335_cc1176	846	9	7	Tal1	54.86	28.29	53,28|54,27|54,29|55,26|55,29|56,29|57,30	Tal1-TF1.Br-1	Macrophage Ly6c+	44.4	pDC	22.2	0.495373	0.556401	0.598585	0.495373	1.28059	0.64374	0.824981	Early T	0.556401	0.562871	0.00338772	0.465274	0.622613	0.498199	0.547588	0.583661	0.607032	0.539848	0.555229	0.00269028	0.465274	0.583661	0.489968	0.527009	0.568068	0.577424	4	7	0	5	1.42706	4.16644	0.716049	1	3	FALSE	3
spcln3_cln008357_cc1215	846	9	7	Cebpa	58	38.71	57,37|57,39|57,40|58,38|59,38|59,39|59,40	Cebpa-BR	EP	100	B	0	1.23689	0.415979	0.755603	1.23689	1.49878	1.23689	1.49878	EP	0.415979	0.418853	7.38799e-05	0.396726	0.424411	0.406647	0.413443	0.421723	0.422347	0.415979	0.418853	7.38799e-05	0.396726	0.424411	0.406647	0.413443	0.421723	0.422347	9	7	0	1	0	1	0	1	3	FALSE	0
spcln3_cln008851_cc1244	846	9	8	Hhex	58	39.5	57,39|57,40|57,41|58,38|58,41|59,38|59,39|59,40	Hhex-TF1.Br	EP	77.8	Neutrophil	22.2	0.949782	0.461601	0.772006	0.949782	1.56805	1.3007	1.56805	EP	0.461601	0.418031	0.00890783	0.401373	0.652276	0.407503	0.416939	0.419632	0.610456	0.41459	0.417959	4.67528e-05	0.401373	0.419632	0.405971	0.412988	0.418594	0.419347	7	8	0	2	0.529706	1.69843	0.345679	1	3	FALSE	4
spcln5_cln000284_cc1497	846	9	7	Erg	23.86	59.14	21,58|22,58|23,59|24,60|25,60|26,59|26,60	Erg-TF1.Br	Neutrophil	100	B	0	0.000145375	0.627987	0.840728	0.000145375	0.678522	0.000145375	0.678522	Neutrophil	0.627987	0.631654	0.000660464	0.590632	0.658608	0.593374	0.604733	0.64876	0.654328	0.627987	0.631654	0.000660464	0.590632	0.658608	0.593374	0.604733	0.64876	0.654328	9	7	0	1	0	1	0	1	5	FALSE	1
spcln5_cln001212_cc1531	846	9	7	Mbd3	29.57	54.86	29,53|29,54|29,55|29,56|30,54|30,56|31,56	Mbd3-As	Neutrophil	66.7	Macrophage Ly6c+	22.2	0.416357	0.584572	0.735266	0.416357	0.805585	0.398436	0.805585	DBL	0.584572	0.582431	0.00185077	0.510969	0.654836	0.544608	0.562948	0.609144	0.627412	0.593106	0.582431	0.00131983	0.559024	0.654836	0.56164	0.567452	0.608699	0.635247	6	7	0	2	0.562335	1.75477	0.375	1	5	FALSE	1
spcln622_bcsplit3	846	9	7	Cebpa	58.71	27	56,27|57,26|58,26|59,27|60,27|60,28|61,28	Cebpa-BR	EP	100	B	0	1.26137	0.413477	0.751057	1.26137	1.6798	1.26137	1.6798	EP	0.413477	0.414996	6.32639e-05	0.394156	0.421806	0.407675	0.412171	0.417194	0.419621	0.413477	0.414996	6.32639e-05	0.394156	0.421806	0.407675	0.412171	0.417194	0.419621	9	7	0	1	0	1	0	1	3	FALSE	0
spcln1_cln000202_cc32	846	8	8	Mbd3	26.12	39.88	23,38|24,39|25,39|26,39|27,40|27,42|28,41|29,41	Mbd3-As	Neutrophil	50	cDC	25	0.127895	0.547662	0.693305	0.127895	0.94934	0.0465845	0.421429	DBL	0.547662	0.58869	0.0200713	0.305127	0.656974	0.403656	0.55145	0.636067	0.648611	0.537404	0.593758	0.0260603	0.305127	0.656974	0.379024	0.489869	0.641293	0.650702	4	8	0	3	0.9557	2.60049	0.571429	0.954243	1	FALSE	1
spcln1_cln001066_cc115	846	8	7	Cebpb	20.43	43.14	20,41|20,42|20,43|20,46|21,41|21,44|21,45	Cebpb-TF1.Br	EP	100	B	0	1.16155	0.422372	0.767215	1.16155	1.47659	1.16155	1.47659	EP	0.422372	0.422558	3.83174e-06	0.418749	0.424804	0.420407	0.421399	0.423662	0.424396	0.422372	0.422558	3.83174e-06	0.418749	0.424804	0.420407	0.421399	0.423662	0.424396	8	7	0	1	0	1	0	0.954243	1	FALSE	0
spcln1_cln001479_cc177	846	8	7	Chd4	13	34.57	12,33|12,34|12,36|13,35|13,36|14,34|15,34	Chd4-As	EP	87.5	MEP	12.5	0.551867	0.369979	0.636432	0.551867	0.768656	0.548954	0.768656	MEP	0.369979	0.376354	0.000431232	0.335222	0.400473	0.344838	0.35757	0.380486	0.38759	0.372981	0.379584	0.000418953	0.335222	0.400473	0.350353	0.366782	0.381013	0.38943	7	7	0	2	0.37677	1.45757	0.21875	0.954243	1	FALSE	0
spcln1_cln002398_cc227	846	8	5	Cited2	13.6	39.8	13,39|13,40|14,39|14,40|14,41	Cited2-TF1.Br	Macrophage Ly6c+	37.5	Neutrophil	37.5	0.475022	0.448749	0.507839	0.475022	0.774503	0.63993	0.774503	Macrophage Ly6c+	0.448749	0.519869	0.0518884	0.0372709	0.651003	0.166964	0.350556	0.615995	0.648766	0.627664	0.647274	0.0013869	0.584716	0.651003	0.597228	0.615995	0.649139	0.650257	3	5	0	3	1.00424	2.72984	0.612245	0.954243	1	TRUE	3
spcln2_cln000202_cc461	846	8	5	Mbd3	38.6	33.6	38,32|38,34|38,35|39,33|40,34	Mbd3-As	Neutrophil	75	DBL	12.5	-0.286554	0.640076	0.856913	-0.286554	-0.159792	-0.245382	-0.159792	Neutrophil	0.640076	0.643379	0.000745691	0.608127	0.673612	0.608987	0.615981	0.659678	0.667862	0.640076	0.643379	0.000745691	0.608127	0.673612	0.608987	0.615981	0.659678	0.667862	6	5	0	2	0.410116	1.50699	0.244898	0.954243	2	FALSE	1
spcln2_cln000414|cln001277_cc489	846	8	2	Multiple																																											2	FALSE
spcln2_cln001507_cc562	846	8	3	Hhex	39.33	27.67	39,27|39,28|40,28	Hhex-TF1.Br-1	Neutrophil	100	B	0	-0.297781	0.649969	0.870157	-0.297781	-0.158315	-0.297781	-0.158315	Neutrophil	0.649969	0.646737	0.000206656	0.633733	0.671625	0.634956	0.641792	0.655616	0.671249	0.649969	0.646737	0.000206656	0.633733	0.671625	0.634956	0.641792	0.655616	0.671249	8	3	0	1	0	1	0	0.954243	2	FALSE	1
spcln2_cln001507_cc563	846	8	4	Hhex	35.5	27	34,26|35,27|36,27|37,28	Hhex-TF1.Br-1	Neutrophil	100	B	0	-0.127461	0.637649	0.853663	-0.127461	0.0211957	-0.127461	0.0211957	Neutrophil	0.637649	0.640345	0.000308808	0.61473	0.667298	0.617359	0.62328	0.646164	0.655421	0.637649	0.640345	0.000308808	0.61473	0.667298	0.617359	0.62328	0.646164	0.655421	8	4	0	1	0	1	0	0.954243	2	FALSE	1
spcln2_cln003378_cc619	846	8	7	Cebpa	38.14	32	38,29|38,30|38,31|38,32|38,33|38,34|39,35	Cebpa-BR	EP	100	B	0	0.941976	0.402903	0.73185	0.941976	1.52471	0.941976	1.52471	EP	0.402903	0.403482	0.000324799	0.374202	0.422762	0.385341	0.391127	0.417968	0.421275	0.402903	0.403482	0.000324799	0.374202	0.422762	0.385341	0.391127	0.417968	0.421275	8	7	0	1	0	1	0	0.954243	2	FALSE	0
spcln2_cln004404_cc639	846	8	6	Smarcd1	38.67	19	38,18|38,19|38,20|39,18|39,19|40,20	Smarcd1-As	EP	100	B	0	1.00861	0.403159	0.732315	1.00861	1.19523	1.00861	1.19523	EP	0.403159	0.400851	8.16512e-05	0.39237	0.420103	0.395396	0.397142	0.407892	0.412949	0.403159	0.400851	8.16512e-05	0.39237	0.420103	0.395396	0.397142	0.407892	0.412949	8	6	0	1	0	1	0	0.954243	2	FALSE	0
spcln3_cln000176|cln000238_cc744	846	8	4	Multiple																																											3	TRUE
spcln3_cln000202_cc753	846	8	7	Mbd3	64.14	32.71	63,31|64,32|64,33|64,34|64,35|65,31|65,33	Mbd3-As	Macrophage Ly6c+	50	Neutrophil	50	0.2448	0.605215	0.713102	0.2448	0.834394	0.421637	0.834394	Macrophage Ly6c+	0.605215	0.605804	0.00266262	0.515255	0.669464	0.551357	0.581589	0.635695	0.667523	0.573489	0.576669	0.00209867	0.515255	0.625363	0.530727	0.553936	0.596222	0.613707	4	7	0	2	0.693147	2	0.5	0.954243	3	FALSE	2
spcln3_cln000272_cc774	846	8	5	Multiple																																											3	FALSE
spcln3_cln000651_cc826	846	8	7	Mbd3	50.71	38	50,35|50,39|51,36|51,37|51,38|51,40|51,41	Mbd3-As	Macrophage Ly6c+	50	Neutrophil	37.5	0.51091	0.550412	0.661596	0.51091	0.869795	0.306102	0.648197	Neutrophil	0.550412	0.568597	0.00576218	0.367682	0.611515	0.500447	0.558669	0.584681	0.59387	0.574032	0.563632	0.000646865	0.557347	0.611515	0.557876	0.558669	0.578995	0.598507	4	7	0	3	0.974315	2.64935	0.59375	0.954243	3	FALSE	2
spcln3_cln000757_cc862	846	8	6	Multiple																																											3	FALSE
spcln3_cln001312|cln003504_cc965	846	8	4	Cebpa	50.75	43.75	50,43|51,43|51,44|51,45	Cebpa-BR	EP	75	MEP	25	0.675801	0.355848	0.591474	0.675801	0.938644	0.703426	0.938644	EP	0.355848	0.377148	0.00319646	0.25832	0.421041	0.273255	0.340873	0.384304	0.399089	0.384801	0.381231	0.000405714	0.361278	0.421041	0.367812	0.375747	0.387888	0.405361	6	4	0	2	0.562335	1.75477	0.375	0.954243	3	FALSE	0
spcln3_cln002602_cc1042	846	8	6	Multiple																																											3	FALSE
spcln3_cln002638_cc1047	846	8	6	Hdac1	58.33	30.33	57,30|57,31|58,31|59,29|59,31|60,30	Hdac1-Br-1	Neutrophil	87.5	CMP	12.5	0.351418	0.43487	0.579284	0.351418	0.617894	0.371194	0.617894	Neutrophil	0.43487	0.462354	0.0363196	0.0685984	0.659796	0.253718	0.335566	0.57748	0.603682	0.487194	0.520783	0.0168196	0.333055	0.659796	0.335064	0.370164	0.578198	0.611698	7	6	0	2	0.37677	1.45757	0.21875	0.954243	3	FALSE	1
spcln3_cln003134_cc1069	846	8	7	Rcor1	52.57	38.71	51,39|51,40|52,39|53,38|53,39|54,37|54,39	Rcor1-As-1	EP	87.5	Macrophage Ly6c+	12.5	0.515857	0.389708	0.654864	0.515857	0.729825	0.643208	0.729825	EP	0.389708	0.3714	0.00279038	0.361664	0.519497	0.364648	0.367572	0.379475	0.422221	0.371166	0.370215	4.6825e-05	0.361664	0.380531	0.364221	0.367023	0.375854	0.379686	7	7	0	2	0.37677	1.45757	0.21875	0.954243	3	FALSE	0
spcln3_cln007123_cc1149	846	8	3	Atf7ip	54.67	37.67	54,38|55,37|55,38	Atf7ip-Br	EP	100	B	0	1.25244	0.415652	0.755008	1.25244	1.59162	1.25244	1.59162	EP	0.415652	0.416355	2.60636e-05	0.40382	0.420775	0.41184	0.415731	0.418265	0.419251	0.415652	0.416355	2.60636e-05	0.40382	0.420775	0.41184	0.415731	0.418265	0.419251	8	3	0	1	0	1	0	0.954243	3	FALSE	0
spcln3_cln007198_cc1166	846	8	6	NTC	51.5	36.83	51,35|51,36|51,37|51,38|52,37|53,38	NTC-Ms-4	Neutrophil	87.5	EP	12.5	0.104258	0.590651	0.813061	0.104258	0.938608	0.0467479	0.938608	EP	0.590651	0.60921	0.00976911	0.37376	0.696413	0.494732	0.577184	0.649768	0.66703	0.621635	0.617348	0.00243701	0.546577	0.696413	0.571063	0.594229	0.651325	0.671228	7	6	0	2	0.37677	1.45757	0.21875	0.954243	3	FALSE	1
spcln3_cln008292_cc1205	846	8	6	Cebpa	63	27	62,26|63,26|63,27|63,28|63,29|64,26	Cebpa-BR	EP	100	B	0	1.16537	0.409752	0.744291	1.16537	1.59279	1.16537	1.59279	EP	0.409752	0.412111	0.000135384	0.385863	0.422106	0.397539	0.405602	0.417936	0.420014	0.409752	0.412111	0.000135384	0.385863	0.422106	0.397539	0.405602	0.417936	0.420014	8	6	0	1	0	1	0	0.954243	3	FALSE	0
spcln3_cln008292_cc1207	846	8	7	Cebpa	61	23	59,23|60,24|61,23|61,24|62,21|62,22|62,24	Cebpa-BR	EP	100	B	0	1.41098	0.413745	0.751545	1.41098	1.5537	1.41098	1.5537	EP	0.413745	0.415896	8.92091e-05	0.397793	0.422189	0.400138	0.410617	0.421421	0.422101	0.413745	0.415896	8.92091e-05	0.397793	0.422189	0.400138	0.410617	0.421421	0.422101	8	7	0	1	0	1	0	0.954243	3	FALSE	0
spcln4_cln000651_cc1296	846	8	5	Mbd3	44.6	54.4	44,53|44,54|44,56|45,55|46,54	Mbd3-As	Neutrophil	87.5	cDC	12.5	0.0911704	0.62803	0.840786	0.0911704	0.759717	0.109479	0.759717	Neutrophil	0.62803	0.637693	0.000961655	0.589824	0.659868	0.592294	0.599162	0.65525	0.657208	0.62803	0.637693	0.000961655	0.589824	0.659868	0.592294	0.599162	0.65525	0.657208	7	5	0	2	0.37677	1.45757	0.21875	0.954243	4	FALSE	1
spcln4_cln002638_cc1385	846	8	6	Hdac1	56.33	49	55,49|56,49|56,50|57,47|57,48|57,51	Hdac1-Br-1	Neutrophil	50	Macrophage Ly6c+	25	0.310847	0.494575	0.591071	0.310847	0.706951	0.193465	0.637958	Early T	0.494575	0.518743	0.02365	0.2638	0.637014	0.335797	0.410574	0.620659	0.629184	0.42727	0.413354	0.021256	0.2638	0.618572	0.306998	0.371796	0.468828	0.558674	4	6	0	4	1.21301	3.36359	0.65625	0.954243	4	FALSE	1
spcln4_cln002684|cln004192|cln004402_cc1391	846	8	5	Multiple																																											4	FALSE
spcln4_cln004140|cln004405|cln007124_cc1408	846	8	6	Multiple																																											4	FALSE
spcln4_cln004357_cc1410	846	8	7	Mbd2	41.71	48.29	40,48|40,49|41,49|42,47|42,48|43,48|44,49	Mbd2-As	EP	87.5	Neutrophil	12.5	0.649562	0.428156	0.739037	0.649562	1.54826	0.79561	1.54826	EP	0.428156	0.396614	0.00802418	0.38489	0.647862	0.385405	0.387532	0.408398	0.489349	0.396769	0.395479	0.000167077	0.38489	0.421415	0.385331	0.386896	0.400904	0.411001	7	7	0	2	0.37677	1.45757	0.21875	0.954243	4	FALSE	0
spcln5_cln000202_cc1485	846	8	5	Mbd3	20.8	60.4	20,60|20,61|21,60|21,61|22,60	Mbd3-As	Neutrophil	50	Macrophage Ly6c+	37.5	0.192818	0.607957	0.724725	0.192818	0.796879	0.118956	0.739037	Macrophage Ly6c+	0.607957	0.60567	0.00182881	0.546016	0.665323	0.56005	0.58011	0.639235	0.653983	0.603198	0.600727	0.00303449	0.546016	0.665323	0.553033	0.563559	0.640366	0.65534	4	5	0	3	0.974315	2.64935	0.59375	0.954243	5	FALSE	1
spcln618_bcsplit0_cc4	846	8	5	Cebpa	24.6	39	24,37|24,41|25,38|25,39|25,40	Cebpa-BR	EP	100	B	0	1.13062	0.404621	0.734971	1.13062	1.59288	1.13062	1.59288	EP	0.404621	0.405394	0.000255425	0.38232	0.423012	0.383798	0.393687	0.418773	0.422247	0.404621	0.405394	0.000255425	0.38232	0.423012	0.383798	0.393687	0.418773	0.422247	8	5	0	1	0	1	0	0.954243	1	FALSE	0
spcln1_cln000030|cln000031_cc9	846	7	6	Multiple																																											1	FALSE
spcln1_cln000057|cln000498|cln000499_cc16	846	7	4	Multiple																																											1	FALSE
spcln1_cln000757_cc98	846	7	5	Multiple																																											1	FALSE
spcln1_cln001312|cln003504_cc162	846	7	6	Cebpa	29.83	41.33	29,40|29,41|29,42|30,42|31,41|31,42	Cebpa-BR	EP	100	B	0	1.05418	0.404996	0.735653	1.05418	1.58613	1.05418	1.58613	EP	0.404996	0.415213	0.000325276	0.383953	0.423148	0.384082	0.387134	0.419197	0.422471	0.404996	0.415213	0.000325276	0.383953	0.423148	0.384082	0.387134	0.419197	0.422471	7	6	0	1	0	1	0	0.90309	1	FALSE	0
spcln1_cln001879_cc194	846	7	3	Rcor1	13.67	40.33	13,40|14,40|14,41	Rcor1-As-1	Macrophage Ly6c+	100	B	0	0.111582	0.576846	0.576846	0.111582	0.853858	0.111582	0.853858	Macrophage Ly6c+	0.576846	0.572265	0.00141951	0.517345	0.623914	0.537857	0.556367	0.605831	0.618669	0.576846	0.572265	0.00141951	0.517345	0.623914	0.537857	0.556367	0.605831	0.618669	7	3	0	1	0	1	0	0.90309	1	FALSE	2
spcln1_cln003377_cc267	846	7	6	NTC	18.33	42.17	17,42|17,44|18,43|19,41|19,42|20,41	NTC-Ms-7	EP	85.7	Neutrophil	14.3	1.03952	0.425193	0.737277	1.03952	1.41627	1.12867	1.41627	EP	0.425193	0.416662	0.00167471	0.390189	0.513804	0.395447	0.405065	0.422783	0.459742	0.410425	0.41392	0.000177543	0.390189	0.423701	0.39457	0.402009	0.420564	0.422783	6	6	0	2	0.410116	1.50699	0.244898	0.90309	1	FALSE	0
spcln1_cln003561|cln003959_cc298	846	7	3	Multiple																																											1	FALSE
spcln1_cln004300|cln004398_cc315	846	7	6	Multiple																																											1	FALSE
spcln1_cln007199_cc382	846	7	6	Wdr82	6.67	31.67	5,31|5,32|6,31|7,32|8,32|9,32	Wdr82-Br-1	Neutrophil	71.4	EP	14.3	0.479195	0.412032	0.552596	0.479195	1.1152	0.553123	0.906169	EP	0.412032	0.422332	0.00753372	0.291561	0.55462	0.309463	0.364553	0.443303	0.49118	0.384379	0.422332	0.00525718	0.291561	0.448887	0.303495	0.321397	0.437718	0.44442	5	6	0	3	0.796312	2.21735	0.44898	0.90309	1	FALSE	1
spcln1_cln007508_cc399	846	7	5	Pax5	3.8	25.8	3,25|3,26|4,25|4,26|5,27	Pax5-TF1.Br-1	EP	100	B	0	1.21911	0.421103	0.76491	1.21911	1.48698	1.21911	1.48698	EP	0.421103	0.42166	6.5164e-06	0.417349	0.424047	0.417739	0.419643	0.42269	0.423721	0.421103	0.42166	6.5164e-06	0.417349	0.424047	0.417739	0.419643	0.42269	0.423721	7	5	0	1	0	1	0	0.90309	1	FALSE	0
spcln2_cln000411_cc487	846	7	6	Cebpa	30.17	28	30,26|30,27|30,28|30,29|30,30|31,28	Cebpa-BR	EP	100	B	0	0.552379	0.367584	0.667695	0.552379	0.70245	0.552379	0.70245	EP	0.367584	0.368548	1.60474e-05	0.360984	0.372583	0.363073	0.365229	0.370257	0.371405	0.367584	0.368548	1.60474e-05	0.360984	0.372583	0.363073	0.365229	0.370257	0.371405	7	6	0	1	0	1	0	0.90309	2	FALSE	0
spcln2_cln001432_cc554	846	7	7	Klf1	37.86	33	36,32|37,33|38,32|38,33|38,34|39,33|39,34	Klf1-TF1.Br	EP	71.4	MEP	14.3	0.503369	0.437279	0.713111	0.503369	1.31825	0.695361	1.31825	EP	0.437279	0.421492	0.00891545	0.324334	0.635312	0.377478	0.417088	0.42282	0.508282	0.420262	0.421492	1.77254e-05	0.412908	0.423596	0.416252	0.421268	0.422045	0.422976	5	7	0	3	0.796312	2.21735	0.44898	0.90309	2	FALSE	4
spcln2_cln002418_cc596	846	7	6	Elk4	32.67	20.5	32,20|32,21|32,22|33,19|33,21|34,20	Elk4-TF1.Br-1	CMP	42.9	Macrophage Ly6c+	42.9	0.497859	0.357682	0.357682	0.497859	0.753177	0.516796	0.625319	DC	0.357682	0.369953	0.0483413	0.115718	0.608709	0.130516	0.164907	0.531387	0.572576	0.161572	0.145314	0.0031125	0.115718	0.223685	0.121637	0.130516	0.1845	0.208011	3	6	0	3	1.00424	2.72984	0.612245	0.90309	2	FALSE	3
spcln3_cln000101|cln000114_cc727	846	7	5	Multiple																																											3	FALSE
spcln3_cln000660_cc839	846	7	5	Mbd2	57	35	57,33|57,34|57,35|57,36|57,37	Mbd2-Br	Neutrophil	57.1	EP	28.6	0.469412	0.532582	0.737628	0.469412	0.786964	0.418413	0.786964	EP	0.532582	0.585514	0.0117217	0.372306	0.636472	0.379019	0.470182	0.596707	0.61364	0.60385	0.596707	0.000502769	0.585514	0.636472	0.588359	0.592625	0.607932	0.625056	4	5	0	3	0.9557	2.60049	0.571429	0.90309	3	FALSE	1
spcln3_cln000757_cc866	846	7	5	Multiple																																											3	FALSE
spcln3_cln000800_cc874	846	7	3	NTC	57.67	38.33	57,38|58,38|58,39	NTC-Ms-7	Neutrophil	71.4	Early T	14.3	0.00927081	0.63683	0.821973	0.00927081	0.559038	-0.184415	0.0696282	Macrophage Ly6c+	0.63683	0.656071	0.00225651	0.541855	0.667993	0.59043	0.642717	0.659559	0.663988	0.655825	0.658289	0.000114554	0.639005	0.667993	0.644944	0.653853	0.659982	0.664789	5	3	0	3	0.796312	2.21735	0.44898	0.90309	3	FALSE	1
spcln3_cln000876|cln000896_cc883	846	7	4	Multiple																																											3	FALSE
spcln3_cln001289_cc952	846	7	3	Hdac1	53.33	41	53,40|53,41|54,42	Hdac1-Br	EP	71.4	DBL Aggregate	28.6	1.07661	0.414009	0.752024	1.07661	1.41041	1.15052	1.41041	EP	0.414009	0.416463	2.72975e-05	0.408038	0.419432	0.408341	0.408797	0.417316	0.418586	0.414009	0.416463	2.72975e-05	0.408038	0.419432	0.408341	0.408797	0.417316	0.418586	5	3	0	1	0	1	0	0.90309	3	FALSE	0
spcln3_cln001580|cln001599_cc988	846	7	6	Multiple																																											3	FALSE
spcln3_cln002145_cc999	846	7	4	Mbd3	55.75	44	55,44|55,45|56,44|57,43	Mbd3-As	Neutrophil	57.1	EP	42.9	0.425019	0.483959	0.724932	0.425019	0.812895	0.319084	0.812895	EP	0.483959	0.487079	0.0118316	0.362925	0.623667	0.371135	0.382902	0.574118	0.596961	0.564746	0.574118	0.00324342	0.487079	0.623667	0.51168	0.54858	0.590284	0.610314	4	4	0	2	0.682908	1.97963	0.489796	0.90309	3	FALSE	4
spcln3_cln002563_cc1036	846	7	6	Pax5	58.67	38.5	57,40|58,40|59,37|59,38|59,39|60,37	Pax5-TF1.Br	EP	85.7	DBL	14.3	1.26752	0.41635	0.756276	1.26752	1.63628	1.26952	1.63628	EP	0.41635	0.419889	6.89646e-05	0.40043	0.422725	0.407373	0.415509	0.420811	0.421788	0.41635	0.419889	6.89646e-05	0.40043	0.422725	0.407373	0.415509	0.420811	0.421788	6	6	0	1	0	1	0	0.90309	3	FALSE	0
spcln3_cln002563_cc1039	846	7	4	Pax5	57.75	44.25	57,43|57,45|58,44|59,45	Pax5-TF1.Br	EP	71.4	Neutrophil	28.6	0.99036	0.485224	0.792828	0.99036	1.75558	1.49583	1.75558	EP	0.485224	0.420796	0.0125457	0.417152	0.6611	0.418847	0.420057	0.528703	0.646399	0.419774	0.420138	2.28911e-06	0.417152	0.420807	0.418282	0.419976	0.420796	0.420802	5	4	0	2	0.59827	1.81897	0.408163	0.90309	3	FALSE	4
spcln3_cln003377_cc1083	846	7	7	NTC	51	39.29	50,39|51,37|51,38|51,40|51,41|51,42|52,38	NTC-Ms-7	Neutrophil	57.1	EP	42.9	0.398194	0.539983	0.807544	0.398194	1.40318	-0.144556	-0.0685918	EP	0.539983	0.592221	0.0146634	0.398099	0.669828	0.40894	0.421069	0.638796	0.659732	0.63491	0.638796	0.00115846	0.592221	0.669828	0.601932	0.616499	0.657208	0.66478	4	7	0	2	0.682908	1.97963	0.489796	0.90309	3	FALSE	4
spcln4_cln000024_cc1247	846	7	1	Multiple																																											4	FALSE
spcln4_cln000202_cc1264	846	7	5	Mbd3	68.2	51	67,51|67,52|68,51|69,51|70,50	Mbd3-As	Neutrophil	42.9	DC	28.6	-0.111393	0.566679	0.758651	-0.111393	0.872663	-0.00505095	0.602845	pDC	0.566679	0.63289	0.0157641	0.421877	0.64527	0.464079	0.527383	0.63908	0.642794	0.566679	0.63289	0.0157641	0.421877	0.64527	0.464079	0.527383	0.63908	0.642794	3	5	0	4	1.27703	3.58599	0.693878	0.90309	4	FALSE	3
spcln4_cln000215_cc1271	846	7	5	Chd4	50.4	53.8	49,53|50,54|51,53|51,54|51,55	Chd4-As-1	Macrophage Ly6c+	71.4	DBL	14.3	-0.156021	0.455134	0.469135	-0.156021	0.741611	-0.475876	-0.338145	DBL	0.455134	0.485709	0.011186	0.247976	0.552158	0.355717	0.46847	0.493823	0.523975	0.496566	0.487914	0.00110816	0.463459	0.552158	0.471477	0.483504	0.495792	0.529612	5	5	0	2	0.450561	1.56919	0.277778	0.90309	4	FALSE	2
spcln4_cln000655_cc1301	846	7	5	Irf8	57.2	53	57,52|57,53|57,54|57,55|58,51	Irf8-TF1.Br-1	EP	71.4	Neutrophil	28.6	0.690373	0.471035	0.76764	0.690373	1.07627	0.984314	1.07627	EP	0.471035	0.40851	0.0141899	0.389513	0.659111	0.391941	0.398185	0.521871	0.641647	0.401626	0.40281	0.000101812	0.389513	0.413737	0.391132	0.39356	0.40851	0.411646	5	5	0	2	0.59827	1.81897	0.408163	0.90309	4	FALSE	4
spcln4_cln000757_cc1325	846	7	2	Multiple																																											4	FALSE
spcln4_cln001078|cln001167_cc1342	846	7	6	Multiple																																											4	FALSE
spcln4_cln001212_cc1347	846	7	6	Mbd3	47.17	50.17	45,49|46,49|47,50|48,51|48,52|49,50	Mbd3-As	EP	28.6	Macrophage Ly6c+	28.6	0.340018	0.519118	0.690627	0.340018	0.823468	0.561354	0.694994	pDC	0.519118	0.558174	0.0146995	0.361558	0.637664	0.368529	0.420417	0.608024	0.630651	0.368529	0.368529	9.71983e-05	0.361558	0.3755	0.362952	0.365043	0.372015	0.374106	2	6	0	4	1.35178	3.86431	0.734694	0.90309	4	FALSE	4
spcln4_cln001213|cln001248|cln001278_cc1349	846	7	3	Multiple																																											4	FALSE
spcln4_cln003567|cln003692_cc1398	846	7	6	Chd4																																											4	FALSE	0
spcln4_cln007228_cc1436	846	7	5	Cebpa	69.6	50.8	69,50|69,51|70,50|70,51|70,52	Cebpa-BR	EP	100	B	0	0.863541	0.389776	0.708007	0.863541	1.57176	0.863541	1.57176	EP	0.389776	0.382857	0.000371405	0.364148	0.419141	0.374625	0.382219	0.398926	0.415272	0.389776	0.382857	0.000371405	0.364148	0.419141	0.374625	0.382219	0.398926	0.415272	7	5	0	1	0	1	0	0.90309	4	FALSE	0
spcln5_cln002381_cc1549	846	7	5	Mbd2	23	51.8	21,52|22,52|23,52|24,51|25,52	Mbd2-Br	EP	100	B	0	1.2042	0.420247	0.763356	1.2042	1.51669	1.2042	1.51669	EP	0.420247	0.421373	1.01404e-05	0.41356	0.422705	0.417098	0.419803	0.422245	0.422615	0.420247	0.421373	1.01404e-05	0.41356	0.422705	0.417098	0.419803	0.422245	0.422615	7	5	0	1	0	1	0	0.90309	5	FALSE	0
spcln632_bcsplit1_cc0	846	7	6	Gltscr1	54.33	28.83	54,27|54,28|54,29|54,31|55,28|55,30	Gltscr1-As	Macrophage Ly6c+	85.7	DBL	14.3	0.0521439	0.426445	0.426445	0.0521439	0.704151	0.103635	0.704151	Macrophage Ly6c+	0.426445	0.493589	0.0335316	0.156597	0.59812	0.201063	0.298438	0.560938	0.584683	0.426445	0.493589	0.0335316	0.156597	0.59812	0.201063	0.298438	0.560938	0.584683	6	6	0	1	0	1	0	0.90309	3	FALSE	2
spcln644_bcsplit0_cc1	846	7	4	Meis1	56	24.25	55,25|56,24|56,25|57,23	Meis1-TF1.Br-1	EP	100	B	0	1.29943	0.421263	0.7652	1.29943	1.62235	1.29943	1.62235	EP	0.421263	0.420598	3.68905e-06	0.418901	0.424362	0.419374	0.419994	0.422495	0.423348	0.421263	0.420598	3.68905e-06	0.418901	0.424362	0.419374	0.419994	0.422495	0.423348	7	4	0	1	0	1	0	0.90309	3	FALSE	0
spcln1_cln000057|cln000498|cln000499_cc15	846	6	2	Multiple																																											1	FALSE
spcln1_cln001066_cc118	846	6	2	Cebpb	29	37.5	29,37|29,38	Cebpb-TF1.Br	EP	100	B	0	1.28072	0.420261	0.763381	1.28072	1.45163	1.28072	1.45163	EP	0.420261	0.421674	1.87847e-05	0.412258	0.423482	0.415684	0.419376	0.423321	0.423426	0.420261	0.421674	1.87847e-05	0.412258	0.423482	0.415684	0.419376	0.423321	0.423426	6	2	0	1	0	1	0	0.845098	1	FALSE	0
spcln1_cln001279|cln001280_cc151	846	6	4	Cited4	24.25	26	24,25|24,26|24,27|25,26	Cited4-TF1.Br	EP	100	B	0	1.22774	0.409938	0.74463	1.22774	1.58024	1.22774	1.58024	EP	0.409938	0.411377	7.37377e-05	0.397123	0.419027	0.400429	0.404685	0.416547	0.418009	0.409938	0.411377	7.37377e-05	0.397123	0.419027	0.400429	0.404685	0.416547	0.418009	6	4	0	1	0	1	0	0.845098	1	FALSE	0
spcln1_cln001785_cc187	846	6	6	Cebpa	13	30.5	11,30|12,31|13,30|13,31|14,31|15,30	Cebpa-BR	EP	100	B	0	1.31877	0.418449	0.760088	1.31877	1.68471	1.31877	1.68471	EP	0.418449	0.421816	6.91562e-05	0.401506	0.422631	0.411265	0.421205	0.421895	0.422264	0.418449	0.421816	6.91562e-05	0.401506	0.422631	0.411265	0.421205	0.421895	0.422264	6	6	0	1	0	1	0	0.845098	1	FALSE	0
spcln1_cln002398_cc228	846	6	4	Cited2	19	41.5	18,41|19,41|19,42|20,42	Cited2-TF1.Br	Neutrophil	66.7	HSC	33.3	-0.0318853	0.433178	0.576054	-0.0318853	0.78794	-0.224079	-0.107067	HSC	0.433178	0.618387	0.0957192	0.0324953	0.651283	0.0342804	0.178194	0.639887	0.646867	0.632627	0.637323	0.000410476	0.604579	0.651283	0.612864	0.625292	0.644659	0.648633	4	4	0	2	0.636514	1.88988	0.444444	0.845098	1	TRUE	1
spcln1_cln003378_cc273	846	6	4	Cebpa	17.5	45.5	17,45|17,46|18,45|18,46	Cebpa-BR	EP	83.3	Neutrophil	16.7	0.787361	0.441396	0.751951	0.787361	1.20939	0.987884	1.20939	EP	0.441396	0.412506	0.00840377	0.379091	0.625781	0.387146	0.399022	0.421102	0.524538	0.404519	0.41049	0.000305412	0.379091	0.423295	0.385535	0.3952	0.414521	0.419786	5	4	0	2	0.450561	1.56919	0.277778	0.845098	1	FALSE	0
spcln1_cln005069|cln007126|cln008372_cc345	846	6	1	Multiple																																											1	FALSE
spcln1_cln005885|cln008358|cln008359_cc361	846	6	3	Multiple																																											1	FALSE
spcln1_cln007293_cc390	846	6	4	Cebpe	22.25	29	21,30|22,29|23,28|23,29	Cebpe-TF1.Br-1	EP	100	B	0	1.43104	0.419686	0.762336	1.43104	1.67706	1.43104	1.67706	EP	0.419686	0.420965	1.22304e-05	0.412934	0.422424	0.416056	0.419479	0.421626	0.422038	0.419686	0.420965	1.22304e-05	0.412934	0.422424	0.416056	0.419479	0.421626	0.422038	6	4	0	1	0	1	0	0.845098	1	FALSE	0
spcln1_cln007293_cc393	846	6	2	Cebpe	17.5	20	17,20|18,20	Cebpe-TF1.Br-1	EP	100	B	0	1.38601	0.414758	0.753384	1.38601	1.61823	1.38601	1.61823	EP	0.414758	0.41551	1.62314e-05	0.408	0.41998	0.410545	0.413486	0.41643	0.418219	0.414758	0.41551	1.62314e-05	0.408	0.41998	0.410545	0.413486	0.41643	0.418219	6	2	0	1	0	1	0	0.845098	1	FALSE	0
spcln2_cln000001|cln000008_cc437	846	6	5	Multiple																																											2	FALSE
spcln2_cln000313_cc470	846	6	5	Rcor1	36.2	17.8	25,9|26,9|43,23|43,24|44,24	Rcor1-As-1	EP	83.3	Macrophage Ly6c+	16.7	0.926776	0.433691	0.712874	0.926776	1.48124	1.20302	1.48124	EP	0.433691	0.41804	0.00347933	0.381785	0.550444	0.397906	0.414782	0.419617	0.485128	0.410341	0.417047	0.000259818	0.381785	0.419812	0.394682	0.414027	0.419032	0.4195	5	5	0	2	0.450561	1.56919	0.277778	0.845098	2	FALSE	0
spcln2_cln000414|cln001277|cln001875_cc493	846	6	5	Multiple																																											2	FALSE
spcln2_cln001731|cln003880_cc570	846	6	5	Multiple																																											2	FALSE
spcln2_cln002044|cln002115_cc580	846	6	6	Multiple																																											2	FALSE
spcln2_cln002140_cc581	846	6	3	Gltscr1	41.33	15	41,14|41,15|42,16	Gltscr1-As	EP	100	B	0	1.40037	0.414319	0.752587	1.40037	1.84436	1.40037	1.84436	EP	0.414319	0.415357	1.32895e-05	0.40762	0.417349	0.410348	0.413503	0.416848	0.417251	0.414319	0.415357	1.32895e-05	0.40762	0.417349	0.410348	0.413503	0.416848	0.417251	6	3	0	1	0	1	0	0.845098	2	FALSE	0
spcln2_cln005069|cln007126|cln008372_cc644	846	6	3	Multiple																																											2	FALSE
spcln3_cln000061_cc718	846	6	3	Multiple																																											3	FALSE
spcln3_cln000061|cln000123_cc722	846	6	4	Multiple																																											3	FALSE
spcln3_cln000145|cln002529_cc736	846	6	5	Multiple																																											3	FALSE
spcln3_cln000347|cln000385_cc786	846	6	4	Multiple																																											3	FALSE
spcln3_cln000443_cc803	846	6	4	Cited4																																											3	FALSE	2
spcln3_cln000559_cc812	846	6	3	Hdac3	58.33	32.67	58,32|58,33|59,33	Hdac3-Br-1	Neutrophil	83.3	EP	16.7	0.357002	0.523306	0.732273	0.357002	0.881394	0.252124	0.701737	EP	0.523306	0.581502	0.0205008	0.295777	0.653783	0.346902	0.443131	0.618075	0.641514	0.548362	0.584563	0.0209176	0.295777	0.653783	0.408842	0.578441	0.629246	0.643968	5	3	0	2	0.450561	1.56919	0.277778	0.845098	3	FALSE	1
spcln3_cln000876|cln000896_cc890	846	6	4	Mbd2	55	39.5	55,38|55,39|55,40|55,41	Mbd2-As	EP	100	B	0	1.11255	0.407766	0.740685	1.11255	1.6696	1.11255	1.6696	EP	0.407766	0.416104	0.000230154	0.386312	0.419014	0.388417	0.396319	0.418532	0.418779	0.407766	0.416104	0.000230154	0.386312	0.419014	0.388417	0.396319	0.418532	0.418779	6	4	0	1	0	1	0	0.845098	3	FALSE	0
spcln3_cln001018|cln001087_cc901	846	6	5	Gltscr1	49.6	38.8	49,38|49,39|49,40|50,38|51,39	Gltscr1-As	Macrophage Ly6c+	50	DC	33.3	0.418007	0.475471	0.561421	0.418007	1.08042	0.495893	0.804982	EP	0.475471	0.476581	0.00313647	0.421095	0.527628	0.424785	0.430321	0.521731	0.525269	0.493597	0.519766	0.00273352	0.433396	0.527628	0.45067	0.476581	0.523697	0.526055	3	5	0	3	1.0114	2.74946	0.611111	0.845098	3	FALSE	2
spcln3_cln001078|cln001167_cc929	846	6	5	Multiple																																											3	FALSE
spcln3_cln001312|cln003504_cc958	846	6	4	Cebpa	57.75	37.75	57,37|57,38|58,38|59,38	Cebpa-BR	EP	50	MEP	50	0.918003	0.342185	0.511279	0.918003	1.3276	1.23643	1.3276	EP	0.342185	0.372054	0.00764207	0.219044	0.422502	0.237833	0.276163	0.410458	0.416669	0.414219	0.410837	5.20231e-05	0.409319	0.422502	0.409623	0.410078	0.416669	0.420169	3	4	0	2	0.693147	2	0.5	0.845098	3	FALSE	4
spcln3_cln001312|cln003504_cc962	846	6	3	Cebpa	55	44	55,43|55,44|55,45	Cebpa-BR	EP	50	MEP	33.3	0.412628	0.38629	0.576387	0.412628	0.670066	0.576491	0.670066	EP	0.38629	0.375057	0.0176042	0.221547	0.626556	0.277075	0.342468	0.384703	0.506738	0.379011	0.378052	5.58792e-05	0.372062	0.38692	0.37326	0.375057	0.382486	0.385146	3	3	0	3	1.0114	2.74946	0.611111	0.845098	3	FALSE	4
spcln3_cln001432_cc977	846	6	4	Multiple																																											3	FALSE
spcln3_cln002175|cln002741|cln004230_cc1002	846	6	4	Multiple																																											3	FALSE
spcln3_cln002903_cc1063	846	6	6	Atf4	66.5	24.67	66,24|66,25|66,26|67,23|67,24|67,26	Atf4-TF1.Br	EP	100	B	0	1.02325	0.405567	0.736689	1.02325	1.42573	1.02325	1.42573	EP	0.405567	0.40796	0.00016611	0.38313	0.419475	0.392302	0.401922	0.413215	0.416439	0.405567	0.40796	0.00016611	0.38313	0.419475	0.392302	0.401922	0.413215	0.416439	6	6	0	1	0	1	0	0.845098	3	FALSE	0
spcln3_cln003377_cc1078	846	6	4	NTC																																											3	FALSE	4
spcln3_cln007197|cln007270_cc1160	846	6	4	Multiple																																											3	FALSE
spcln3_cln007198_cc1167	846	6	5	NTC	56.6	39.8	55,41|56,41|57,39|57,40|58,38	NTC-Ms-4	Neutrophil	66.7	BMP	16.7	0.181293	0.551455	0.774382	0.181293	0.75618	0.214663	0.75618	EP	0.551455	0.579211	0.0117789	0.378004	0.660004	0.437407	0.526513	0.613542	0.641419	0.594818	0.596376	0.00316967	0.526513	0.660004	0.542322	0.566036	0.625158	0.646066	4	5	0	3	0.867563	2.3811	0.5	0.845098	3	FALSE	1
spcln3_cln007336|cln007368_cc1181	846	6	4	Multiple																																											3	FALSE
spcln3_cln008362_cc1232	846	6	5	Cebpa	56.4	30.6	55,31|56,30|57,29|57,31|57,32	Cebpa-BR	EP	100	B	0	0.850382	0.393392	0.714575	0.850382	1.5995	0.850382	1.5995	EP	0.393392	0.39036	0.00023503	0.376579	0.422038	0.381505	0.387079	0.393863	0.408312	0.393392	0.39036	0.00023503	0.376579	0.422038	0.381505	0.387079	0.393863	0.408312	6	5	0	1	0	1	0	0.845098	3	FALSE	0
spcln4_cln000321_cc1276	846	6	6	Pax5	55	46.67	53,46|54,47|55,46|55,47|56,47|57,47	Pax5-TF1.Br-1	Neutrophil	66.7	EP	16.7	0.503881	0.53926	0.736014	0.503881	1.45061	0.257402	0.931334	EP	0.53926	0.581606	0.0167262	0.342356	0.656883	0.380943	0.459028	0.636608	0.655232	0.618419	0.619635	0.00181989	0.577524	0.656883	0.579973	0.583647	0.654407	0.655893	4	6	0	3	0.867563	2.3811	0.5	0.845098	4	FALSE	1
spcln4_cln000660_cc1305	846	6	2	Mbd2	78.5	51	78,51|79,51	Mbd2-Br	EP	83.3	Neutrophil	16.7	0.98223	0.420113	0.72014	0.98223	1.76481	1.01741	1.76481	EP	0.420113	0.399519	0.00368037	0.3775	0.539749	0.380545	0.38589	0.41716	0.480273	0.396185	0.392791	0.00030658	0.3775	0.420798	0.379936	0.38359	0.406248	0.414978	5	2	0	2	0.450561	1.56919	0.277778	0.845098	4	FALSE	0
spcln4_cln000670_cc1312	846	6	4	NTC	75	50.75	74,51|75,50|75,51|76,51	NTC-Ms-3	EP	100	B	0	1.20611	0.413401	0.750919	1.20611	1.55081	1.20611	1.55081	EP	0.413401	0.419635	0.000309586	0.37801	0.424429	0.397024	0.416612	0.422228	0.423543	0.413401	0.419635	0.000309586	0.37801	0.424429	0.397024	0.416612	0.422228	0.423543	6	4	0	1	0	1	0	0.845098	4	FALSE	0
spcln4_cln002684|cln004192|cln004402_cc1390	846	6	4	Multiple																																											4	FALSE
spcln4_cln004373_cc1415	846	6	6	Cited4	64.17	64	63,63|63,64|64,64|64,65|65,64|66,64	Cited4-TF1.Br	EP	83.3	Neutrophil	16.7	0.977087	0.446271	0.761003	0.977087	1.72943	1.23703	1.72943	EP	0.446271	0.418375	0.00767487	0.389021	0.623312	0.39733	0.408783	0.421813	0.523108	0.410863	0.418212	0.000190561	0.389021	0.422905	0.395669	0.40564	0.418537	0.421158	5	6	0	2	0.450561	1.56919	0.277778	0.845098	4	FALSE	0
spcln4_cln007198_cc1430	846	6	5	NTC	51.4	58.2	50,59|51,58|51,59|52,57|53,58	NTC-Ms-4	Neutrophil	100	B	0	0.280835	0.424078	0.567742	0.280835	0.475045	0.280835	0.475045	Neutrophil	0.424078	0.382114	0.0224107	0.272939	0.640974	0.290124	0.311432	0.529371	0.599997	0.424078	0.382114	0.0224107	0.272939	0.640974	0.290124	0.311432	0.529371	0.599997	6	5	0	1	0	1	0	0.845098	4	FALSE	1
spcln5_cln000030|cln000031_cc1469	846	6	4	NTC	13.75	57.5	13,59|14,56|14,57|14,58	NTC-Ms-7	EP	100	B	0	1.1933	0.408108	0.741305	1.1933	1.48665	1.1933	1.48665	EP	0.408108	0.414386	0.000223211	0.384538	0.422226	0.389704	0.399376	0.41765	0.420233	0.408108	0.414386	0.000223211	0.384538	0.422226	0.389704	0.399376	0.41765	0.420233	6	4	0	1	0	1	0	0.845098	5	FALSE	0
spcln5_cln000202_cc1483	846	6	4	Mbd3	17.75	53.25	17,52|17,54|18,53|19,54	Mbd3-As	Macrophage Ly6c+	50	Neutrophil	33.3	-0.0802133	0.520594	0.592825	-0.0802133	0.49822	-0.10713	0.385979	CMP	0.520594	0.600042	0.0506331	0.0639176	0.644827	0.322088	0.584323	0.626751	0.639653	0.593447	0.596515	0.000142894	0.580259	0.603569	0.58351	0.588387	0.600042	0.602158	3	4	0	3	1.0114	2.74946	0.611111	0.845098	5	FALSE	2
spcln5_cln000306_cc1502	846	6	4	Elk4	19.25	57.25	19,56|19,57|19,58|20,58	Elk4-TF1.Br-1	Neutrophil	83.3	Macrophage Ly6c+	16.7	0.368476	0.593156	0.761356	0.368476	0.934908	0.407429	0.934908	Neutrophil	0.593156	0.582073	0.00173719	0.553294	0.661932	0.555379	0.563074	0.612636	0.642017	0.595807	0.584242	0.0021188	0.553294	0.661932	0.554962	0.557464	0.622101	0.646	5	4	0	2	0.450561	1.56919	0.277778	0.845098	5	FALSE	1
spcln5_cln001789|cln002390_cc1539	846	6	5	Multiple																																											5	FALSE
spcln5_cln001791|cln002644_cc1542	846	6	5	Ebf1	14.2	72.6	13,72|14,72|14,74|15,72|15,73	Ebf1-B.Br	Neutrophil	66.7	Macrophage Ly6c+	33.3	0.0848092	0.634494	0.782028	0.0848092	0.851398	-0.215644	-0.0619876	Macrophage Ly6c+	0.634494	0.643451	0.00100942	0.587622	0.671785	0.596968	0.613735	0.653482	0.663062	0.653256	0.652623	0.000215982	0.635995	0.671785	0.640468	0.647178	0.658701	0.666551	4	5	0	2	0.636514	1.88988	0.444444	0.845098	5	FALSE	1
spcln5_cln003993_cc1582	846	6	6	Tal1	19.5	53.5	19,53|19,54|19,55|20,52|20,53|20,54	Tal1-TF1.Br-1	EP	100	B	0	0.822058	0.395096	0.71767	0.822058	1.36637	0.822058	1.36637	EP	0.395096	0.395504	8.96214e-05	0.381766	0.409267	0.38516	0.390007	0.399147	0.404624	0.395096	0.395504	8.96214e-05	0.381766	0.409267	0.38516	0.390007	0.399147	0.404624	6	6	0	1	0	1	0	0.845098	5	FALSE	0
spcln1_cln000024_cc5	846	5	5	NTC	17.6	37	17,36|17,38|18,36|18,37|18,38	NTC-Ms-2	EP	100	B	0	1.16873	0.411202	0.746925	1.16873	1.50769	1.16873	1.50769	EP	0.411202	0.415305	0.000112491	0.395025	0.422124	0.399697	0.406705	0.416851	0.420015	0.411202	0.415305	0.000112491	0.395025	0.422124	0.399697	0.406705	0.416851	0.420015	5	5	0	1	0	1	0	0.778151	1	FALSE	0
spcln1_cln000068_cc23	846	5	3	Smarcd2	14	41	14,40|14,41|14,42	Smarcd2-As	DC	60	HSC	20	0.588298	0.208756	0.208756	0.588298	0.960001	0.476934	0.556217	pDC	0.208756	0.208756		0.208756	0.208756	0.208756	0.208756	0.208756	0.208756										3	3	0	3	0.950271	2.58641	0.56	0.778151	1	TRUE	3
spcln1_cln000328|cln000329_cc57	846	5	3	NTC	29	44	29,43|29,44|29,45	NTC-Ms-3	EP	80	DBL	20	1.12223	0.413847	0.751729	1.12223	1.7015	1.24076	1.7015	EP	0.413847	0.419851	0.000232752	0.391253	0.424433	0.399429	0.411693	0.422004	0.423461	0.413847	0.419851	0.000232752	0.391253	0.424433	0.399429	0.411693	0.422004	0.423461	4	3	0	1	0	1	0	0.778151	1	FALSE	0
spcln1_cln001066_cc120	846	5	3	Cebpb	29	41	29,40|29,41|29,42	Cebpb-TF1.Br	EP	100	B	0	1.26079	0.418578	0.760323	1.26079	1.53144	1.26079	1.53144	EP	0.418578	0.42235	7.26786e-05	0.403329	0.422543	0.410889	0.42223	0.422437	0.422501	0.418578	0.42235	7.26786e-05	0.403329	0.422543	0.410889	0.42223	0.422437	0.422501	5	3	0	1	0	1	0	0.778151	1	FALSE	0
spcln1_cln001066_cc130	846	5	4	Cebpb	29.75	34	29,34|29,35|30,34|31,33	Cebpb-TF1.Br	EP	100	B	0	1.40502	0.420499	0.763812	1.40502	1.53053	1.40502	1.53053	EP	0.420499	0.422949	1.47385e-05	0.416073	0.423638	0.416259	0.416538	0.423295	0.423501	0.420499	0.422949	1.47385e-05	0.416073	0.423638	0.416259	0.416538	0.423295	0.423501	5	4	0	1	0	1	0	0.778151	1	FALSE	0
spcln1_cln001279|cln001280_cc158	846	5	5	Multiple																																											1	FALSE
spcln1_cln001661|cln001669_cc181	846	5	1	Mbd2	7	25	7,25	Mbd2-As	Neutrophil	60	Macrophage Ly6c+	40	0.411488	0.448423	0.523705	0.411488	0.577958	0.473172	0.577958	Neutrophil	0.448423	0.408746	0.01198	0.34807	0.567379	0.350566	0.354311	0.563607	0.56587	0.370376	0.354311	0.00111393	0.34807	0.408746	0.349318	0.35119	0.381528	0.397859	3	1	0	2	0.673012	1.96013	0.48	0.778151	1	FALSE	1
spcln1_cln002140_cc202	846	5	4	Gltscr1	17.75	46.75	17,46|17,47|18,47|19,47	Gltscr1-As	EP	100	B	0	1.10319	0.405754	0.737028	1.10319	1.68566	1.10319	1.68566	EP	0.405754	0.421015	0.000528472	0.376719	0.423782	0.379978	0.384866	0.422386	0.423224	0.405754	0.421015	0.000528472	0.376719	0.423782	0.379978	0.384866	0.422386	0.423224	5	4	0	1	0	1	0	0.778151	1	FALSE	0
spcln1_cln002345|cln007267_cc207	846	5	5	Brd9	16.6	45.6	16,44|16,46|17,45|17,46|17,47	Brd9-As	Macrophage Ly6c+	40	Neutrophil	40	0.307435	0.514576	0.5972	0.307435	0.829308	0.218872	0.765233	MEP	0.514576	0.559825	0.0226649	0.25358	0.639191	0.368147	0.539999	0.580285	0.615629	0.549912	0.549912	0.000196545	0.539999	0.559825	0.541982	0.544956	0.554869	0.557843	2	5	0	3	1.05492	2.87175	0.64	0.778151	1	FALSE	3
spcln1_cln002376_cc223	846	5	4	NTC	21.5	31.75	20,32|21,32|22,32|23,31	NTC-Ms-1	EP	60	Macrophage Ly6c+	40	0.130758	0.404742	0.590781	0.130758	0.680156	0.536948	0.680156	EP	0.404742	0.382283	0.00128366	0.377743	0.457182	0.378367	0.379303	0.427197	0.445188	0.379776	0.379303	5.32181e-06	0.377743	0.382283	0.378055	0.378523	0.380793	0.381687	3	4	0	2	0.673012	1.96013	0.48	0.778151	1	FALSE	4
spcln1_cln002468_cc234	846	5	5	Kmt2d	14.4	23.4	13,24|14,24|15,22|15,23|15,24	Kmt2d-Br	Neutrophil	100	B	0	0.368235	0.517486	0.692793	0.368235	0.736532	0.368235	0.736532	Neutrophil	0.517486	0.580243	0.0149641	0.303584	0.593787	0.393009	0.527147	0.582668	0.589339	0.517486	0.580243	0.0149641	0.303584	0.593787	0.393009	0.527147	0.582668	0.589339	5	5	0	1	0	1	0	0.778151	1	FALSE	1
spcln1_cln002638_cc250	846	5	5	Hdac1	29.6	44.2	29,43|29,44|29,45|30,44|31,45	Hdac1-Br-1	Neutrophil	80	DBL	20	0.425611	0.513276	0.687157	0.425611	0.770769	0.361156	0.770769	DBL	0.513276	0.527413	0.0181749	0.344224	0.654055	0.383126	0.441479	0.59921	0.632117	0.513276	0.527413	0.0181749	0.344224	0.654055	0.383126	0.441479	0.59921	0.632117	4	5	0	1	0	1	0	0.778151	1	FALSE	1
spcln1_cln002688_cc260	846	5	4	NTC	6	22.25	5,23|6,22|6,23|7,21	NTC-Ms-6	EP	100	B	0	1.48469	0.420072	0.763038	1.48469	1.67108	1.48469	1.67108	EP	0.420072	0.419907	5.84942e-06	0.416864	0.422916	0.417631	0.41878	0.421895	0.422508	0.420072	0.419907	5.84942e-06	0.416864	0.422916	0.417631	0.41878	0.421895	0.422508	5	4	0	1	0	1	0	0.778151	1	FALSE	0
spcln1_cln002688_cc261	846	5	3	NTC	28	32	27,31|28,32|29,33	NTC-Ms-6	EP	100	B	0	1.2693	0.41517	0.754132	1.2693	1.58575	1.2693	1.58575	EP	0.41517	0.419837	0.000111111	0.397462	0.423254	0.40395	0.413683	0.421614	0.422598	0.41517	0.419837	0.000111111	0.397462	0.423254	0.40395	0.413683	0.421614	0.422598	5	3	0	1	0	1	0	0.778151	1	FALSE	0
spcln1_cln003378_cc288	846	5	3	Cebpa	17.67	41.67	17,42|18,41|18,42	Cebpa-BR	EP	100	B	0	1.12662	0.408838	0.742631	1.12662	1.53941	1.12662	1.53941	EP	0.408838	0.407163	0.000187811	0.388541	0.42183	0.395264	0.405347	0.421308	0.421621	0.408838	0.407163	0.000187811	0.388541	0.42183	0.395264	0.405347	0.421308	0.421621	5	3	0	1	0	1	0	0.778151	1	FALSE	0
spcln1_cln003378_cc295	846	5	4	Cebpa	21.5	37.5	21,38|21,39|22,36|22,37	Cebpa-BR	EP	100	B	0	0.879183	0.401892	0.730014	0.879183	1.21861	0.879183	1.21861	EP	0.401892	0.39941	0.000193039	0.387661	0.423351	0.389695	0.392747	0.406292	0.416527	0.401892	0.39941	0.000193039	0.387661	0.423351	0.389695	0.392747	0.406292	0.416527	5	4	0	1	0	1	0	0.778151	1	FALSE	0
spcln1_cln003809|cln003869_cc306	846	5	4	Multiple																																											1	FALSE
spcln1_cln005069|cln007126|cln008372_cc337	846	5	4	Multiple																																											1	FALSE
spcln1_cln005069|cln007126|cln008372_cc338	846	5	4	Multiple																																											1	FALSE
spcln1_cln005237_cc356	846	5	4	Irf8	30	44	29,44|30,43|30,44|31,45	Irf8-TF1.Br-1	EP	80	Neutrophil	20	0.644469	0.448389	0.751821	0.644469	0.984587	0.856207	0.984587	EP	0.448389	0.397359	0.0134525	0.392302	0.655803	0.393799	0.396045	0.400437	0.553657	0.396536	0.396702	1.13551e-05	0.392302	0.400437	0.393425	0.395109	0.398128	0.399514	4	4	0	2	0.500402	1.64938	0.32	0.778151	1	FALSE	0
spcln1_cln005885|cln008358|cln008359_cc358	846	5	4	Multiple																																											1	FALSE
spcln1_cln007367|cln008295_cc398	846	5	3	Multiple																																											1	FALSE
spcln1_cln007579_cc403	846	5	2	Smarcd2	20	32.5	20,32|20,33	Smarcd2-As	Macrophage Ly6c+	80	DBL	20	-0.155088	0.511283	0.511283	-0.155088	0.771412	-0.0738777	0.771412	Macrophage Ly6c+	0.511283	0.525378	0.00402869	0.425279	0.569097	0.448772	0.484011	0.55265	0.562518	0.511283	0.525378	0.00402869	0.425279	0.569097	0.448772	0.484011	0.55265	0.562518	4	2	0	1	0	1	0	0.778151	1	FALSE	2
spcln1_cln007645|cln007682|cln007866_cc404	846	5	5	Multiple																																											1	FALSE
spcln1_cln008213_cc411	846	5	2	Hdac3	22.5	35	22,35|23,35	Hdac3-Br-1	Neutrophil	100	B	0	0.65375	0.587362	0.786341	0.65375	0.886702	0.65375	0.886702	Neutrophil	0.587362	0.591969	0.000136527	0.568244	0.598934	0.575178	0.585581	0.592083	0.596194	0.587362	0.591969	0.000136527	0.568244	0.598934	0.575178	0.585581	0.592083	0.596194	5	2	0	1	0	1	0	0.778151	1	FALSE	1
spcln1_cln008327|cln008331_cc429	846	5	5	Multiple																																											1	FALSE
spcln2_cln000049_cc447	846	5	4	Rcor1	33.25	20.75	33,20|33,21|33,22|34,20	Rcor1-As	Macrophage Ly6c+	80	DBL	20	-0.222438	0.55968	0.55968	-0.222438	0.522938	-0.408782	-0.355804	DBL	0.55968	0.564783	0.000224122	0.538041	0.571114	0.545084	0.555648	0.568815	0.570194	0.55968	0.564783	0.000224122	0.538041	0.571114	0.545084	0.555648	0.568815	0.570194	4	4	0	1	0	1	0	0.778151	2	FALSE	2
spcln2_cln000234|cln000432|cln000664_cc464	846	5	5	NTC	34.8	33	34,32|34,34|35,32|35,34|36,33	NTC-Ms-5	EP	80	Neutrophil	20	0.932239	0.458302	0.771283	0.932239	1.4503	1.20912	1.4503	EP	0.458302	0.418153	0.0104338	0.40304	0.640563	0.405265	0.408602	0.421152	0.552798	0.412737	0.413378	7.04261e-05	0.40304	0.421152	0.404708	0.407212	0.418903	0.420252	4	5	0	2	0.500402	1.64938	0.32	0.778151	2	FALSE	0
spcln2_cln000328|cln000329_cc472	846	5	3	Klf1																																											2	FALSE
spcln2_cln000757_cc516	846	5	4	Multiple																																											2	FALSE
spcln2_cln001202|cln001289_cc528	846	5	3	Hdac1	29.67	28.33	29,28|30,28|30,29	Hdac1-Br	EP	60	DBL	20	0.965074	0.441964	0.692911	0.965074	1.35005	1.25598	1.35005	EP	0.441964	0.410628	0.0041353	0.408207	0.538394	0.40852	0.408988	0.443605	0.500478	0.409821	0.409248	3.85781e-06	0.408207	0.412008	0.408416	0.408728	0.410628	0.411456	3	3	0	2	0.562335	1.75477	0.375	0.778151	2	FALSE	0
spcln2_cln001312|cln003504_cc545	846	5	2	Cebpa																																											2	FALSE	0
spcln2_cln001479_cc556	846	5	5	Chd4	37.4	17.2	36,18|37,17|37,18|38,17|39,16	Chd4-As	EP	80	MEP	20	0.645581	0.378581	0.631928	0.645581	1.0195	0.686907	1.0195	EP	0.378581	0.384715	0.000464181	0.341376	0.397609	0.358513	0.384219	0.384986	0.392559	0.387882	0.38485	4.21483e-05	0.384219	0.397609	0.384368	0.384591	0.388141	0.393822	4	5	0	2	0.500402	1.64938	0.32	0.778151	2	FALSE	0
spcln2_cln001507|cln002195_cc564	846	5	5	Hhex	36.6	29.8	35,29|36,30|37,30|37,31|38,29	Hhex-TF1.Br-1	Neutrophil	60	DC	20	-0.194806	0.64031	0.857226	-0.194806	0.313453	-0.282635	-0.231523	Early T	0.64031	0.638278	0.000461807	0.619908	0.662743	0.623582	0.629093	0.650511	0.65785	0.64031	0.638278	0.000461807	0.619908	0.662743	0.623582	0.629093	0.650511	0.65785	3	5	0	3	0.950271	2.58641	0.56	0.778151	2	FALSE	1
spcln2_cln003880_cc632	846	5	4	Multiple																																											2	FALSE
spcln2_cln008279_cc668	846	5	5	Rcor1	31.6	30.4	31,29|31,31|31,32|32,30|33,30	Rcor1-As	Macrophage Ly6c+	100	B	0	0.400711	0.447844	0.447844	0.400711	0.675676	0.400711	0.675676	Macrophage Ly6c+	0.447844	0.548668	0.0390164	0.133047	0.619693	0.231187	0.378397	0.559413	0.595581	0.447844	0.548668	0.0390164	0.133047	0.619693	0.231187	0.378397	0.559413	0.595581	5	5	0	1	0	1	0	0.778151	2	FALSE	2
spcln3_cln000024_cc701	846	5	5	NTC	57.6	37.8	57,37|57,38|57,39|58,38|59,37	NTC-Ms-2	EP	60	DBL	20	0.73545	0.453401	0.751273	0.73545	1.38491	1.01666	1.38491	EP	0.453401	0.408831	0.0104476	0.390481	0.605461	0.392382	0.395234	0.466998	0.550075	0.402714	0.396818	0.000256534	0.390481	0.420843	0.391749	0.39365	0.408831	0.416038	3	5	0	2	0.562335	1.75477	0.375	0.778151	3	FALSE	4
spcln3_cln000040|cln000717|cln000723_cc707	846	5	4	Multiple																																											3	FALSE
spcln3_cln000040|cln000717|cln000723_cc709	846	5	4	Multiple																																											3	FALSE
spcln3_cln000202_cc749	846	5	5	Mbd3	55.8	32.4	54,33|55,33|56,32|57,31|57,33	Mbd3-As	Macrophage Ly6c+	60	EP	20	0.481348	0.49247	0.580624	0.481348	1.22724	0.243595	0.657971	EP	0.49247	0.573181	0.019145	0.280614	0.606339	0.337741	0.423432	0.578785	0.595317	0.586102	0.578785	0.000315019	0.573181	0.606339	0.574302	0.575983	0.592562	0.600828	3	5	0	3	0.950271	2.58641	0.56	0.778151	3	FALSE	2
spcln3_cln000234|cln000432|cln000664_cc763	846	5	4	NTC	41.25	40.5	41,40|41,41|41,42|42,39	NTC-Ms-5	EP	100	B	0	0.904764	0.400556	0.727587	0.904764	1.15971	0.904764	1.15971	EP	0.400556	0.402036	9.0136e-05	0.388684	0.412333	0.390662	0.393628	0.406098	0.409839	0.400556	0.402036	9.0136e-05	0.388684	0.412333	0.390662	0.393628	0.406098	0.409839	5	4	0	1	0	1	0	0.778151	3	FALSE	0
spcln3_cln000338_cc785	846	5	1	NTC	56	42	56,42	NTC-Ms-2	Neutrophil	100	B	0	0.2249	0.335079	0.448592	0.2249	0.33796	0.2249	0.33796	Neutrophil	0.335079	0.329686	0.000229916	0.320085	0.356861	0.321901	0.324626	0.344136	0.351771	0.335079	0.329686	0.000229916	0.320085	0.356861	0.321901	0.324626	0.344136	0.351771	5	1	0	1	0	1	0	0.778151	3	FALSE	1
spcln3_cln000651_cc827	846	5	5	Mbd3	51.6	32	51,31|51,32|51,33|52,32|53,32	Mbd3-As	EP	40	Neutrophil	40	0.513137	0.511747	0.781151	0.513137	1.41691	1.06766	1.41691	EP	0.511747	0.499663	0.0168543	0.392392	0.655271	0.398226	0.406977	0.604433	0.634936	0.402116	0.402116	0.0001891	0.392392	0.411839	0.394337	0.397254	0.406977	0.409895	2	5	0	2	0.693147	2	0.5	0.778151	3	FALSE	4
spcln3_cln000660_cc834	846	5	3	Mbd2	66.67	25.33	66,25|67,25|67,26	Mbd2-Br	CMP	40	Neutrophil	40	0.665644	0.390631	0.535132	0.665644	0.855455	0.459936	0.472812	EP	0.390631	0.394624	0.0411814	0.151317	0.592753	0.181	0.225523	0.588936	0.591226	0.18842	0.18842	0.00275328	0.151317	0.225523	0.158738	0.169869	0.206972	0.218103	2	3	0	3	1.05492	2.87175	0.64	0.778151	3	FALSE	4
spcln3_cln000660_cc841	846	5	4	Mbd2	72.5	31	71,31|72,31|73,31|74,31	Mbd2-Br	EP	80	DBL	20	0.814595	0.380238	0.69068	0.814595	1.3604	0.775252	1.3604	DBL	0.380238	0.372505	0.000510947	0.363463	0.412477	0.364136	0.365145	0.387598	0.402526	0.380238	0.372505	0.000510947	0.363463	0.412477	0.364136	0.365145	0.387598	0.402526	4	4	0	1	0	1	0	0.778151	3	FALSE	0
spcln3_cln000876|cln000896_cc882	846	5	5	Multiple																																											3	FALSE
spcln3_cln000876|cln000896_cc888	846	5	2	Mbd2	51	38.5	51,38|51,39	Mbd2-As	EP	100	B	0	1.33938	0.412917	0.750041	1.33938	1.80045	1.33938	1.80045	EP	0.412917	0.419882	0.000232917	0.385819	0.421256	0.398135	0.41661	0.421019	0.421161	0.412917	0.419882	0.000232917	0.385819	0.421256	0.398135	0.41661	0.421019	0.421161	5	2	0	1	0	1	0	0.778151	3	FALSE	0
spcln3_cln000876|cln000896_cc889	846	5	3	Mbd2	57	37	57,36|57,37|57,38	Mbd2-As	EP	100	B	0	1.34862	0.412006	0.748385	1.34862	1.61983	1.34862	1.61983	EP	0.412006	0.411117	8.51506e-05	0.401916	0.42261	0.402858	0.404271	0.420113	0.421611	0.412006	0.411117	8.51506e-05	0.401916	0.42261	0.402858	0.404271	0.420113	0.421611	5	3	0	1	0	1	0	0.778151	3	FALSE	0
spcln3_cln001018|cln001087_cc911	846	5	5	Multiple																																											3	FALSE
spcln3_cln001202|cln001289_cc944	846	5	4	Multiple																																											3	FALSE
spcln3_cln001202|cln001289_cc945	846	5	3	Multiple																																											3	FALSE
spcln3_cln001202|cln001289_cc946	846	5	4	Multiple																																											3	FALSE
spcln3_cln001312|cln003504_cc961	846	5	4	Cebpa	47.75	39.5	47,39|48,38|48,40|48,41	Cebpa-BR	EP	60	HSC	20	0.383024	0.293326	0.481095	0.383024	0.949533	0.68989	0.949533	EP	0.293326	0.361715	0.0174574	0.0964369	0.413315	0.145971	0.220271	0.374891	0.397945	0.383307	0.374891	0.000718757	0.361715	0.413315	0.36435	0.368303	0.394103	0.40563	3	4	0	3	0.950271	2.58641	0.56	0.778151	3	TRUE	4
spcln3_cln001312|cln003504_cc963	846	5	3	Cebpa	44.33	40.33	44,40|44,41|45,40	Cebpa-BR	EP	100	B	0	0.835243	0.396527	0.720269	0.835243	1.28723	0.835243	1.28723	EP	0.396527	0.405524	0.000982545	0.347979	0.42391	0.362519	0.384329	0.420894	0.422703	0.396527	0.405524	0.000982545	0.347979	0.42391	0.362519	0.384329	0.420894	0.422703	5	3	0	1	0	1	0	0.778151	3	FALSE	0
spcln3_cln001432_cc975	846	5	4	Multiple																																											3	FALSE
spcln3_cln002405_cc1021	846	5	4	Cited4	58.25	42.25	58,41|58,42|58,43|59,43	Cited4-TF1.Br-1	Neutrophil	100	B	0	0.541055	0.408815	0.547308	0.541055	0.945447	0.541055	0.945447	Neutrophil	0.408815	0.44541	0.0209319	0.194329	0.588959	0.261942	0.363363	0.452015	0.534181	0.408815	0.44541	0.0209319	0.194329	0.588959	0.261942	0.363363	0.452015	0.534181	5	4	0	1	0	1	0	0.778151	3	FALSE	1
spcln3_cln002563_cc1040	846	5	2	Pax5	63.5	43	63,43|64,43	Pax5-TF1.Br	EP	60	Neutrophil	40	0.814487	0.51432	0.808454	0.814487	1.63113	1.53685	1.63113	EP	0.51432	0.420367	0.0172874	0.415044	0.663104	0.416873	0.419617	0.653466	0.659249	0.418343	0.419617	8.30215e-06	0.415044	0.420367	0.415959	0.41733	0.419992	0.420217	3	2	0	2	0.673012	1.96013	0.48	0.778151	3	FALSE	4
spcln3_cln002638_cc1048	846	5	3	Hdac1	43.67	44.33	43,44|44,44|44,45	Hdac1-Br-1	Neutrophil	60	EP	20	0.534043	0.480673	0.641108	0.534043	1.105	0.285828	0.888651	EP	0.480673	0.490703	0.0146541	0.315351	0.614452	0.353464	0.410633	0.572227	0.597562	0.459427	0.490703	0.0172299	0.315351	0.572227	0.350422	0.403027	0.531465	0.555922	3	3	0	3	0.950271	2.58641	0.56	0.778151	3	FALSE	1
spcln3_cln003378_cc1084	846	5	3	Cebpa	44	38	44,37|44,38|44,39	Cebpa-BR	EP	80	DBL	20	0.95196	0.407281	0.739802	0.95196	1.24137	1.02533	1.24137	EP	0.407281	0.413094	0.000364571	0.381014	0.421921	0.388296	0.39922	0.421155	0.421614	0.407281	0.413094	0.000364571	0.381014	0.421921	0.388296	0.39922	0.421155	0.421614	4	3	0	1	0	1	0	0.778151	3	FALSE	0
spcln3_cln003612_cc1100	846	5	3	Multiple																																											3	FALSE
spcln3_cln003801|cln007290|cln007291_cc1104	846	5	4	Multiple																																											3	FALSE
spcln3_cln003829|cln004413_cc1107	846	5	4	Hhex	58.25	26.5	58,25|58,26|58,27|59,28	Hhex-TF1.Br-1	EP	60	Neutrophil	40	0.462482	0.498329	0.78123	0.462482	1.30164	0.988781	1.30164	EP	0.498329	0.422026	0.0191491	0.382488	0.660775	0.385347	0.389635	0.63672	0.651153	0.39805	0.389635	0.000443915	0.382488	0.422026	0.383918	0.386062	0.405831	0.415548	3	4	0	2	0.673012	1.96013	0.48	0.778151	3	FALSE	4
spcln3_cln003958_cc1114	846	5	4	Elk4	55	26.75	54,27|55,26|55,27|56,27	Elk4-TF1.Br	Neutrophil	60	EP	40	0.116071	0.541823	0.798955	0.116071	0.718707	-0.2594	-0.178668	EP	0.541823	0.634315	0.0205334	0.384697	0.656688	0.385015	0.385493	0.647922	0.653182	0.646308	0.647922	0.000127089	0.634315	0.656688	0.637037	0.641118	0.652305	0.654935	3	4	0	2	0.673012	1.96013	0.48	0.778151	3	FALSE	4
spcln3_cln004357_cc1130	846	5	5	Mbd2	43.6	44.6	43,43|43,45|44,44|44,45|44,46	Mbd2-As	EP	60	DBL	20	0.664	0.436901	0.72293	0.664	0.922999	0.649648	0.662876	DBL	0.436901	0.386038	0.0106703	0.383695	0.591834	0.384121	0.38476	0.438179	0.530372	0.385257	0.385115	2.68171e-06	0.383695	0.386961	0.383979	0.384405	0.386038	0.386592	3	5	0	2	0.562335	1.75477	0.375	0.778151	3	FALSE	4
spcln3_cln006693_cc1142	846	5	4	Gata1	63.5	20	63,19|63,20|64,20|64,21	Gata1-B.Br-1	EP	60	DBL Aggregate	20	0.707384	0.37822	0.616481	0.707384	1.22937	0.583384	0.791839	DBL Aggregate	0.37822	0.387482	0.000480427	0.345571	0.392346	0.357711	0.375923	0.38978	0.39132	0.389104	0.388925	9.96537e-06	0.38604	0.392346	0.386617	0.387482	0.390635	0.391662	3	4	0	2	0.562335	1.75477	0.375	0.778151	3	FALSE	0
spcln3_cln007123_cc1148	846	5	2	Atf7ip	55	40.5	55,40|55,41	Atf7ip-Br	EP	100	B	0	1.09123	0.419777	0.762501	1.09123	1.51383	1.09123	1.51383	EP	0.419777	0.4214	3.0929e-05	0.410558	0.424897	0.414002	0.419168	0.422861	0.424083	0.419777	0.4214	3.0929e-05	0.410558	0.424897	0.414002	0.419168	0.422861	0.424083	5	2	0	1	0	1	0	0.778151	3	FALSE	0
spcln3_cln007123_cc1150	846	5	1	Atf7ip	59	38	59,38	Atf7ip-Br	EP	100	B	0	1.16792	0.420134	0.76315	1.16792	1.29716	1.16792	1.29716	EP	0.420134	0.420347	8.41293e-06	0.415879	0.423458	0.417145	0.419046	0.421941	0.422851	0.420134	0.420347	8.41293e-06	0.415879	0.423458	0.417145	0.419046	0.421941	0.422851	5	1	0	1	0	1	0	0.778151	3	FALSE	0
spcln3_cln007198_cc1168	846	5	3	NTC	52	40.33	51,41|52,40|53,40	NTC-Ms-4	Neutrophil	80	EP	20	0.301743	0.477246	0.679325	0.301743	0.813254	0.353198	0.813254	Neutrophil	0.477246	0.51792	0.0162246	0.289356	0.626394	0.342782	0.422922	0.529639	0.587692	0.490827	0.523779	0.0204032	0.289356	0.626394	0.357925	0.460779	0.553828	0.597368	4	3	0	2	0.500402	1.64938	0.32	0.778151	3	FALSE	1
spcln3_cln008127_cc1189	846	5	3	Meis1	58	38	57,37|58,38|59,39	Meis1-TF1.Br	EP	100	B	0	1.00146	0.422123	0.766762	1.00146	1.25176	1.00146	1.25176	EP	0.422123	0.422503	2.09191e-06	0.420139	0.424029	0.420652	0.421421	0.422521	0.423426	0.422123	0.422503	2.09191e-06	0.420139	0.424029	0.420652	0.421421	0.422521	0.423426	5	3	0	1	0	1	0	0.778151	3	FALSE	0
spcln3_cln008361|cln008363_cc1228	846	5	3	Multiple																																											3	FALSE
spcln4_cln000202_cc1269	846	5	4	Mbd3	69.5	54	69,54|69,55|70,53|70,54	Mbd3-As	DC	40	Macrophage Ly6c+	40	0.0932731	0.461115	0.461115	0.0932731	0.804376	-0.264986	-0.207349	Macrophage Ly6c+	0.461115	0.461115	0.0715013	0.272037	0.650194	0.309853	0.366576	0.555655	0.612378										2	4	0	3	1.05492	2.87175	0.64	0.778151	4	FALSE	3
spcln4_cln000655_cc1297	846	5	4	Irf8	63	54.25	62,53|63,54|63,55|64,55	Irf8-TF1.Br-1	EP	100	B	0	1.10234	0.410202	0.745109	1.10234	1.42995	1.10234	1.42995	EP	0.410202	0.41205	7.25849e-05	0.401072	0.418886	0.401254	0.401528	0.417476	0.418322	0.410202	0.41205	7.25849e-05	0.401072	0.418886	0.401254	0.401528	0.417476	0.418322	5	4	0	1	0	1	0	0.778151	4	FALSE	0
spcln4_cln000757_cc1323	846	5	4	Multiple																																											4	FALSE
spcln4_cln000757_cc1324	846	5	5	Multiple																																											4	FALSE
spcln4_cln001213|cln001248|cln001278_cc1350	846	5	4	Multiple																																											4	FALSE
spcln4_cln001312|cln003504_cc1353	846	5	4	Cebpa	54.25	47.5	53,47|54,48|55,47|55,48	Cebpa-BR	EP	80	MEP	20	0.419472	0.363183	0.601244	0.419472	0.588545	0.381592	0.588545	MEP	0.363183	0.363913	7.99347e-05	0.351489	0.374814	0.354095	0.358005	0.367695	0.371966	0.364478	0.365804	9.54065e-05	0.351489	0.374814	0.355216	0.360807	0.369475	0.372678	4	4	0	2	0.500402	1.64938	0.32	0.778151	4	FALSE	0
spcln4_cln002563_cc1375	846	5	4	Pax5	57.75	46.75	57,47|57,48|58,46|59,46	Pax5-TF1.Br	EP	80	DC	20	1.04398	0.412533	0.749342	1.04398	1.5693	1.27241	1.5693	EP	0.412533	0.416878	0.000140314	0.395299	0.421076	0.401002	0.409557	0.419853	0.420587	0.412533	0.416878	0.000140314	0.395299	0.421076	0.401002	0.409557	0.419853	0.420587	4	4	0	2	0.500402	1.64938	0.32	0.778151	4	FALSE	0
spcln4_cln007197|cln007270|cln007464_cc1428	846	5	5	Multiple																																											4	FALSE
spcln4_cln008360_cc1455	846	5	2	NTC																																											4	FALSE	0
spcln5_cln000202_cc1487	846	5	4	Mbd3	21.5	50.5	21,50|21,51|22,50|22,51	Mbd3-As	Neutrophil	60	Macrophage Ly6c+	40	0.273771	0.562334	0.683214	0.273771	0.710937	0.158294	0.710937	Macrophage Ly6c+	0.562334	0.563661	0.007185	0.463884	0.649536	0.475059	0.49182	0.642767	0.646829	0.594708	0.642767	0.00795084	0.49182	0.649536	0.52201	0.567294	0.646152	0.648182	3	4	0	2	0.673012	1.96013	0.48	0.778151	5	FALSE	1
spcln5_cln000573|cln001783_cc1507	846	5	4	Multiple																																											5	FALSE
spcln5_cln002526|cln002649_cc1561	846	5	4	Rcor1	14.75	61.75	14,61|15,61|15,62|15,63	Rcor1-As-1	Macrophage Ly6c+	100	B	0	0.035172	0.543187	0.543187	0.035172	0.618645	0.035172	0.618645	Macrophage Ly6c+	0.543187	0.553628	0.00243421	0.457845	0.582742	0.495526	0.552048	0.569671	0.577514	0.543187	0.553628	0.00243421	0.457845	0.582742	0.495526	0.552048	0.569671	0.577514	5	4	0	1	0	1	0	0.778151	5	FALSE	2
spcln1_cln000024_cc8	846	4	2	NTC																																											1	FALSE
spcln1_cln000234|cln000432|cln000664_cc39	846	4	4	Multiple																																											1	FALSE
spcln1_cln000234|cln000432|cln000664_cc41	846	4	2	NTC																																											1	FALSE
spcln1_cln000305_cc48	846	4	4	Elk4																																											1	FALSE
spcln1_cln000411_cc67	846	4	4	Cebpa																																											1	FALSE
spcln1_cln000411_cc69	846	4	2	Cebpa																																											1	FALSE
spcln1_cln000660_cc86	846	4	4	Mbd2																																											1	FALSE
spcln1_cln000751_cc96	846	4	2	Mbd3																																											1	FALSE
spcln1_cln000751_cc97	846	4	3	Mbd3																																											1	FALSE
spcln1_cln000938_cc109	846	4	1	Smarcd2																																											1	TRUE
spcln1_cln001066_cc125	846	4	4	Cebpb																																											1	FALSE
spcln1_cln001479_cc178	846	4	4	Chd4																																											1	FALSE
spcln1_cln001785_cc188	846	4	3	Cebpa																																											1	FALSE
spcln1_cln001785_cc190	846	4	3	Cebpa																																											1	FALSE
spcln1_cln001791|cln002644_cc192	846	4	4	Ebf1																																											1	FALSE
spcln1_cln002140_cc203	846	4	4	Gltscr1																																											1	FALSE
spcln1_cln002145_cc204	846	4	4	Mbd3																																											1	FALSE
spcln1_cln002345|cln007267_cc212	846	4	4	Multiple																																											1	FALSE
spcln1_cln002347_cc215	846	4	3	Men1																																											1	FALSE
spcln1_cln002370_cc219	846	4	3	Brd9																																											1	FALSE
spcln1_cln002370_cc220	846	4	1	Brd9																																											1	FALSE
spcln1_cln002503_cc241	846	4	4	Runx1																																											1	FALSE
spcln1_cln003378_cc275	846	4	4	Cebpa																																											1	FALSE
spcln1_cln003378_cc285	846	4	3	Cebpa																																											1	FALSE
spcln1_cln003801|cln007290|cln007291_cc303	846	4	3	NTC																																											1	FALSE
spcln1_cln003809|cln003869_cc304	846	4	2	Multiple																																											1	FALSE
spcln1_cln003913_cc311	846	4	4	Mbd3																																											1	FALSE
spcln1_cln005069|cln007126|cln008372_cc341	846	4	2	Multiple																																											1	FALSE
spcln1_cln005069|cln007126|cln008372_cc349	846	4	3	Multiple																																											1	FALSE
spcln1_cln005237_cc353	846	4	3	Irf8																																											1	FALSE
spcln1_cln005237_cc355	846	4	3	Irf8																																											1	FALSE
spcln1_cln005885|cln008358|cln008359_cc365	846	4	2	Multiple																																											1	FALSE
spcln1_cln005885|cln008358|cln008359_cc368	846	4	2	Hoxa7																																											1	FALSE
spcln1_cln005885|cln008358|cln008359_cc370	846	4	3	Rcor1																																											1	FALSE
spcln1_cln007123_cc372	846	4	4	Atf7ip																																											1	FALSE
spcln1_cln007199_cc385	846	4	4	Wdr82																																											1	FALSE
spcln1_cln007199_cc386	846	4	2	Wdr82																																											1	FALSE
spcln1_cln007293_cc391	846	4	4	Cebpe																																											1	FALSE
spcln1_cln007293_cc392	846	4	3	Cebpe																																											1	FALSE
spcln1_cln007683_cc405	846	4	2	Hhex																																											1	FALSE
spcln1_cln008285|cln008298_cc422	846	4	2	Hdac1																																											1	FALSE
spcln1_cln008327|cln008331_cc427	846	4	3	Erg																																											1	FALSE
spcln1_cln008327|cln008331_cc433	846	4	3	Multiple																																											1	FALSE
spcln2_cln000001|cln000008_cc439	846	4	2	Multiple																																											2	TRUE
spcln2_cln000024_cc442	846	4	1	NTC																																											2	FALSE
spcln2_cln000052_cc449	846	4	3	Cebpe																																											2	FALSE
spcln2_cln000234|cln000432|cln000664_cc463	846	4	3	NTC																																											2	FALSE
spcln2_cln000305_cc467	846	4	3	Elk4																																											2	TRUE
spcln2_cln000411_cc484	846	4	4	Cebpa																																											2	FALSE
spcln2_cln000411_cc486	846	4	4	Cebpa																																											2	FALSE
spcln2_cln000414|cln001277_cc490	846	4	2	Multiple																																											2	FALSE
spcln2_cln000414|cln001277|cln001875_cc495	846	4	4	Multiple																																											2	FALSE
spcln2_cln000660_cc508	846	4	4	Mbd2																																											2	FALSE
spcln2_cln001066_cc522	846	4	3	Cebpb																																											2	FALSE
spcln2_cln001312|cln003504_cc544	846	4	4	Cebpa																																											2	FALSE
spcln2_cln001432_cc551	846	4	3	Multiple																																											2	FALSE
spcln2_cln001479_cc555	846	4	4	Chd4																																											2	FALSE
spcln2_cln001479_cc561	846	4	1	Multiple																																											2	FALSE
spcln2_cln001661|cln001669_cc567	846	4	2	Mbd2																																											2	FALSE
spcln2_cln002398_cc592	846	4	3	Cited2																																											2	FALSE
spcln2_cln003377_cc617	846	4	2	NTC																																											2	FALSE
spcln2_cln006693_cc647	846	4	4	Gata1																																											2	FALSE
spcln2_cln008290|cln008299_cc671	846	4	1	Multiple																																											2	FALSE
spcln3_cln000024_cc698	846	4	4	NTC																																											3	FALSE
spcln3_cln000030|cln000031_cc705	846	4	2	NTC																																											3	FALSE
spcln3_cln000104|cln000141_cc730	846	4	3	Multiple																																											3	FALSE
spcln3_cln000176|cln000238_cc743	846	4	4	Multiple																																											3	FALSE
spcln3_cln000202_cc754	846	4	3	Mbd3																																											3	FALSE
spcln3_cln000202_cc755	846	4	2	Mbd3																																											3	FALSE
spcln3_cln000328|cln000329_cc781	846	4	3	NTC																																											3	FALSE
spcln3_cln000559_cc808	846	4	4	Hdac3																																											3	FALSE
spcln3_cln000559_cc809	846	4	4	Hdac3																																											3	FALSE
spcln3_cln000559_cc815	846	4	4	Hdac3																																											3	FALSE
spcln3_cln000595|cln000596_cc823	846	4	4	Multiple																																											3	FALSE
spcln3_cln000660_cc835	846	4	1	Mbd2																																											3	FALSE
spcln3_cln000660_cc842	846	4	2	Mbd2																																											3	FALSE
spcln3_cln000660_cc843	846	4	3	Mbd2																																											3	FALSE
spcln3_cln000660_cc845	846	4	4	Mbd2																																											3	FALSE
spcln3_cln000670_cc847	846	4	4	NTC																																											3	FALSE
spcln3_cln000717_cc853	846	4	2	Multiple																																											3	FALSE
spcln3_cln000717|cln000723_cc854	846	4	3	Multiple																																											3	FALSE
spcln3_cln000876|cln000896_cc885	846	4	2	Multiple																																											3	FALSE
spcln3_cln001018|cln001087_cc904	846	4	3	Gltscr1																																											3	FALSE
spcln3_cln001018|cln001087_cc910	846	4	3	Multiple																																											3	FALSE
spcln3_cln001054_cc917	846	4	2	NTC																																											3	FALSE
spcln3_cln001066_cc926	846	4	4	Cebpb																																											3	FALSE
spcln3_cln001312|cln003504_cc960	846	4	3	Cebpa																																											3	FALSE
spcln3_cln001312|cln003504_cc966	846	4	3	Cebpa																																											3	FALSE
spcln3_cln001432_cc979	846	4	4	Klf1																																											3	FALSE
spcln3_cln001432_cc982	846	4	2	Klf1																																											3	FALSE
spcln3_cln001432|cln008260_cc983	846	4	4	Multiple																																											3	FALSE
spcln3_cln001661|cln001669_cc989	846	4	1	Multiple																																											3	FALSE
spcln3_cln001780_cc993	846	4	2	Setdb1																																											3	FALSE
spcln3_cln001780_cc994	846	4	1	Setdb1																																											3	FALSE
spcln3_cln002205_cc1012	846	4	3	Multiple																																											3	FALSE
spcln3_cln002390_cc1018	846	4	2	Rcor1																																											3	FALSE
spcln3_cln002405_cc1022	846	4	1	Cited4																																											3	FALSE
spcln3_cln002638_cc1052	846	4	3	Hdac1																																											3	FALSE
spcln3_cln002647|cln002648_cc1055	846	4	3	Multiple																																											3	FALSE
spcln3_cln003134_cc1071	846	4	4	Rcor1																																											3	FALSE
spcln3_cln003377_cc1074	846	4	3	NTC																																											3	FALSE
spcln3_cln003547_cc1096	846	4	2	Hdac1																																											3	FALSE
spcln3_cln003573_cc1098	846	4	3	Runx1																																											3	TRUE
spcln3_cln003801|cln007290|cln007291_cc1106	846	4	3	NTC																																											3	FALSE
spcln3_cln003921_cc1110	846	4	2	Cebpb																																											3	FALSE
spcln3_cln003921_cc1112	846	4	4	Cebpb																																											3	FALSE
spcln3_cln007123_cc1151	846	4	3	Atf7ip																																											3	FALSE
spcln3_cln007124_cc1153	846	4	4	Multiple																																											3	FALSE
spcln3_cln007197|cln007270_cc1157	846	4	3	Multiple																																											3	FALSE
spcln3_cln007197|cln007270_cc1159	846	4	3	Multiple																																											3	FALSE
spcln3_cln007197|cln007270|cln007464_cc1162	846	4	4	Multiple																																											3	TRUE
spcln3_cln008357_cc1214	846	4	2	Cebpa																																											3	FALSE
spcln3_cln008362_cc1231	846	4	3	Cebpa																																											3	FALSE
spcln3_cln008362_cc1234	846	4	4	Cebpa																																											3	FALSE
spcln3_cln008851_cc1242	846	4	2	Hhex																																											3	FALSE
spcln4_cln000040|cln000717|cln000723_cc1253	846	4	2	Multiple																																											4	FALSE
spcln4_cln000040|cln000717|cln000723_cc1255	846	4	4	Multiple																																											4	FALSE
spcln4_cln000202_cc1266	846	4	2	Mbd3																																											4	FALSE
spcln4_cln000202_cc1268	846	4	4	Mbd3																																											4	FALSE
spcln4_cln000406_cc1283	846	4	4	NTC																																											4	FALSE
spcln4_cln000406_cc1284	846	4	3	NTC																																											4	FALSE
spcln4_cln000443_cc1287	846	4	3	Cited4																																											4	FALSE
spcln4_cln000574_cc1290	846	4	2	Phf10																																											4	FALSE
spcln4_cln000660_cc1307	846	4	4	Mbd2																																											4	FALSE
spcln4_cln000717|cln000723_cc1318	846	4	4	Multiple																																											4	FALSE
spcln4_cln000757_cc1329	846	4	1	Multiple																																											4	FALSE
spcln4_cln002025_cc1362	846	4	1	Klf1																																											4	FALSE
spcln4_cln002381|cln004301_cc1367	846	4	3	Mbd2																																											4	FALSE
spcln4_cln002563_cc1374	846	4	3	Pax5																																											4	FALSE
spcln4_cln002563_cc1381	846	4	3	Pax5																																											4	FALSE
spcln4_cln003567|cln003692_cc1396	846	4	1	Multiple																																											4	FALSE
spcln4_cln003567|cln003692_cc1397	846	4	4	Chd4																																											4	FALSE
spcln4_cln003567|cln003692_cc1399	846	4	1	Multiple																																											4	FALSE
spcln4_cln003612_cc1402	846	4	2	Multiple																																											4	FALSE
spcln4_cln007123_cc1420	846	4	2	Atf7ip																																											4	FALSE
spcln4_cln007123_cc1421	846	4	2	Atf7ip																																											4	FALSE
spcln4_cln007123_cc1422	846	4	4	Atf7ip																																											4	FALSE
spcln4_cln007197|cln007270|cln007464_cc1429	846	4	3	Multiple																																											4	FALSE
spcln4_cln007228_cc1438	846	4	3	Cebpa																																											4	FALSE
spcln4_cln008851_cc1459	846	4	4	Hhex																																											4	FALSE
spcln4_cln008851_cc1460	846	4	2	Hhex																																											4	FALSE
spcln4_cln008851_cc1461	846	4	4	Hhex																																											4	FALSE
spcln5_cln000175|cln000409|cln000898_cc1479	846	4	3	Multiple																																											5	FALSE
spcln5_cln000202_cc1486	846	4	3	Mbd3																																											5	FALSE
spcln5_cln000306|cln000745_cc1503	846	4	4	Elk4																																											5	FALSE
spcln5_cln000406_cc1505	846	4	4	NTC																																											5	FALSE
spcln5_cln000413_cc1506	846	4	4	Cebpa																																											5	FALSE
spcln5_cln000574_cc1510	846	4	1	Phf10																																											5	FALSE
spcln5_cln000677|cln000832_cc1520	846	4	3	Hhex																																											5	FALSE
spcln5_cln001076|cln002640_cc1527	846	4	3	Rcor1																																											5	TRUE
spcln5_cln001767|cln001812|cln002642_cc1536	846	4	3	Multiple																																											5	FALSE
spcln5_cln001767|cln001812|cln002642_cc1537	846	4	1	Multiple																																											5	FALSE
spcln5_cln001922|cln003940_cc1545	846	4	4	Multiple																																											5	FALSE
spcln5_cln002526|cln002649_cc1560	846	4	3	Rcor1																																											5	FALSE
spcln5_cln002563_cc1564	846	4	3	Pax5																																											5	FALSE
spcln5_cln002684|cln004192|cln004402_cc1574	846	4	2	Multiple																																											5	FALSE
spcln5_cln002684|cln004192|cln004402_cc1576	846	4	1	Multiple																																											5	FALSE
spcln5_cln003993_cc1583	846	4	4	Tal1																																											5	FALSE
spcln5_cln004357_cc1585	846	4	4	Mbd2																																											5	FALSE
spcln5_cln004358_cc1586	846	4	4	Elk4																																											5	FALSE
spcln618_bcsplit0_cc7	846	4	2	Cebpa																																											1	FALSE
spcln618_bcsplit6_cc1	846	4	3	Cebpa																																											1	FALSE
spcln618_cc5	846	4	3	Cebpa																																											1	FALSE
spcln620_bcsplit1_cc0	846	4	3	Cebpa																																											3	FALSE
spcln637_cc0	846	4	1	Hdac1																																											3	FALSE
spcln1_cln000020_cc3	846	3	1	Rcor1																																											1	FALSE
spcln1_cln000024_cc7	846	3	3	NTC																																											1	FALSE
spcln1_cln000035|cln004105_cc10	846	3	3	Phf10																																											1	FALSE
spcln1_cln000057|cln000827_cc19	846	3	3	Gata1																																											1	FALSE
spcln1_cln000168|cln000196|cln000272|cln000275_cc25	846	3	3	Multiple																																											1	FALSE
spcln1_cln000202_cc35	846	3	2	Mbd3																																											1	FALSE
spcln1_cln000312|cln000482_cc49	846	3	3	Multiple																																											1	FALSE
spcln1_cln000328|cln000329_cc59	846	3	2	NTC																																											1	FALSE
spcln1_cln000347|cln000385_cc63	846	3	2	Multiple																																											1	FALSE
spcln1_cln000406_cc65	846	3	3	NTC																																											1	FALSE
spcln1_cln000508|cln000565_cc79	846	3	2	Cebpb																																											1	FALSE
spcln1_cln000559_cc80	846	3	3	Hdac3																																											1	FALSE
spcln1_cln000660_cc87	846	3	3	Mbd2																																											1	FALSE
spcln1_cln000660_cc88	846	3	2	Mbd2																																											1	FALSE
spcln1_cln000722_cc94	846	3	3	Kmt2a																																											1	FALSE
spcln1_cln000855_cc102	846	3	3	Smarcd2																																											1	FALSE
spcln1_cln000876|cln000896_cc106	846	3	3	Mbd2																																											1	FALSE
spcln1_cln000938_cc108	846	3	3	Smarcd2																																											1	FALSE
spcln1_cln000997|cln002383|cln007268_cc110	846	3	1	Multiple																																											1	FALSE
spcln1_cln001066_cc117	846	3	1	Cebpb																																											1	FALSE
spcln1_cln001066_cc119	846	3	2	Cebpb																																											1	FALSE
spcln1_cln001066_cc122	846	3	2	Cebpb																																											1	FALSE
spcln1_cln001066_cc126	846	3	2	Cebpb																																											1	FALSE
spcln1_cln001066_cc127	846	3	3	Cebpb																																											1	FALSE
spcln1_cln001066_cc128	846	3	3	Cebpb																																											1	FALSE
spcln1_cln001066_cc132	846	3	2	Cebpb																																											1	FALSE
spcln1_cln001202|cln001289_cc136	846	3	3	Hdac1																																											1	FALSE
spcln1_cln001202|cln001289_cc138	846	3	2	Multiple																																											1	FALSE
spcln1_cln001255|cln003625|cln003641_cc146	846	3	3	Multiple																																											1	TRUE
spcln1_cln001279|cln001280_cc149	846	3	3	Cited4																																											1	FALSE
spcln1_cln001279|cln001280_cc150	846	3	3	Cited4																																											1	FALSE
spcln1_cln001279|cln001280_cc153	846	3	2	Cited4																																											1	FALSE
spcln1_cln001279|cln001280_cc155	846	3	2	Multiple																																											1	FALSE
spcln1_cln001312|cln003504_cc167	846	3	3	Cebpa																																											1	FALSE
spcln1_cln001337_cc169	846	3	1	Brd9																																											1	FALSE
spcln1_cln001406_cc170	846	3	2	NTC																																											1	FALSE
spcln1_cln001432_cc173	846	3	1	Multiple																																											1	FALSE
spcln1_cln001432_cc175	846	3	3	Klf1																																											1	FALSE
spcln1_cln001661|cln001669_cc182	846	3	3	Mbd2																																											1	FALSE
spcln1_cln001785_cc189	846	3	2	Cebpa																																											1	FALSE
spcln1_cln002025_cc197	846	3	1	Hhex																																											1	FALSE
spcln1_cln002231_cc206	846	3	2	Rcor1																																											1	FALSE
spcln1_cln002345|cln007267_cc208	846	3	3	Brd9																																											1	TRUE
spcln1_cln002376_cc221	846	3	2	NTC																																											1	FALSE
spcln1_cln002376_cc224	846	3	3	NTC																																											1	FALSE
spcln1_cln002393_cc226	846	3	3	Atf7ip																																											1	FALSE
spcln1_cln002481_cc237	846	3	2	Cebpa																																											1	FALSE
spcln1_cln002526|cln002649_cc242	846	3	3	Rcor1																																											1	FALSE
spcln1_cln002526|cln002649_cc243	846	3	2	Rcor1																																											1	FALSE
spcln1_cln002563_cc247	846	3	3	Pax5																																											1	FALSE
spcln1_cln002688_cc263	846	3	1	NTC																																											1	FALSE
spcln1_cln002799_cc264	846	3	2	Multiple																																											1	FALSE
spcln1_cln003378_cc279	846	3	2	Cebpa																																											1	FALSE
spcln1_cln003378_cc289	846	3	3	Cebpa																																											1	FALSE
spcln1_cln003378_cc292	846	3	3	Cebpa																																											1	FALSE
spcln1_cln003690|cln003809|cln003869_cc301	846	3	3	Multiple																																											1	FALSE
spcln1_cln004276_cc313	846	3	3	Gltscr1																																											1	FALSE
spcln1_cln004373_cc324	846	3	2	Cited4																																											1	FALSE
spcln1_cln004373_cc325	846	3	3	Cited4																																											1	FALSE
spcln1_cln004398_cc326	846	3	2	Multiple																																											1	FALSE
spcln1_cln004404_cc328	846	3	3	Smarcd1																																											1	FALSE
spcln1_cln004404_cc331	846	3	3	Smarcd1																																											1	FALSE
spcln1_cln005069|cln007126|cln008372_cc344	846	3	1	Multiple																																											1	FALSE
spcln1_cln005069|cln007126|cln008372_cc347	846	3	2	Multiple																																											1	FALSE
spcln1_cln005069|cln007126|cln008372_cc350	846	3	1	Multiple																																											1	FALSE
spcln1_cln005069|cln007126|cln008372_cc351	846	3	3	Multiple																																											1	FALSE
spcln1_cln005237_cc352	846	3	2	Irf8																																											1	FALSE
spcln1_cln005885|cln008358|cln008359_cc359	846	3	3	Multiple																																											1	FALSE
spcln1_cln005885|cln008358|cln008359_cc363	846	3	2	Multiple																																											1	FALSE
spcln1_cln005885|cln008358|cln008359_cc364	846	3	1	Multiple																																											1	FALSE
spcln1_cln007123_cc373	846	3	2	Atf7ip																																											1	FALSE
spcln1_cln007199_cc380	846	3	2	Wdr82																																											1	FALSE
spcln1_cln007302|cln007303_cc395	846	3	2	Multiple																																											1	TRUE
spcln1_cln007508_cc400	846	3	3	Pax5																																											1	FALSE
spcln1_cln008085_cc408	846	3	1	Wdr82																																											1	FALSE
spcln1_cln008214|cln008280|cln008291|cln008328|cln008340_cc414	846	3	3	Multiple																																											1	FALSE
spcln1_cln008317_cc424	846	3	3	Cebpe																																											1	FALSE
spcln1_cln008327|cln008331_cc428	846	3	2	Multiple																																											1	FALSE
spcln2_cln000024_cc443	846	3	3	NTC																																											2	FALSE
spcln2_cln000328|cln000329_cc473	846	3	1	Mbd2																																											2	FALSE
spcln2_cln000411_cc485	846	3	3	Cebpa																																											2	FALSE
spcln2_cln000559_cc501	846	3	1	Hdac3																																											2	FALSE
spcln2_cln000559_cc502	846	3	2	Hdac3																																											2	FALSE
spcln2_cln000559_cc503	846	3	1	Hdac3																																											2	FALSE
spcln2_cln000655_cc506	846	3	1	Multiple																																											2	FALSE
spcln2_cln000722_cc511	846	3	2	Kmt2a																																											2	FALSE
spcln2_cln001066_cc521	846	3	3	Cebpb																																											2	FALSE
spcln2_cln001146_cc526	846	3	3	Cebpe																																											2	FALSE
spcln2_cln001212_cc535	846	3	2	Mbd3																																											2	FALSE
spcln2_cln001289_cc538	846	3	3	Hdac1																																											2	FALSE
spcln2_cln001312|cln003504_cc547	846	3	3	Cebpa																																											2	FALSE
spcln2_cln001312|cln003504_cc548	846	3	1	Multiple																																											2	FALSE
spcln2_cln001432_cc549	846	3	2	Multiple																																											2	FALSE
spcln2_cln001432_cc552	846	3	2	Multiple																																											2	FALSE
spcln2_cln002370_cc588	846	3	2	Brd9																																											2	FALSE
spcln2_cln002398_cc593	846	3	2	Cited2																																											2	FALSE
spcln2_cln002398_cc594	846	3	3	Cited2																																											2	TRUE
spcln2_cln002638_cc605	846	3	3	Hdac1																																											2	FALSE
spcln2_cln002795_cc609	846	3	1	Multiple																																											2	FALSE
spcln2_cln003378_cc622	846	3	2	Cebpa																																											2	FALSE
spcln2_cln003378_cc624	846	3	3	Cebpa																																											2	FALSE
spcln2_cln003626_cc627	846	3	1	NTC																																											2	FALSE
spcln2_cln003643|cln003938_cc628	846	3	3	Multiple																																											2	FALSE
spcln2_cln004300|cln004398|cln006693_cc637	846	3	2	Multiple																																											2	FALSE
spcln2_cln004357_cc638	846	3	1	Mbd2																																											2	FALSE
spcln2_cln005237_cc646	846	3	1	Multiple																																											2	FALSE
spcln2_cln007198_cc655	846	3	1	NTC																																											2	FALSE
spcln2_cln007364|cln008246_cc657	846	3	1	Multiple																																											2	FALSE
spcln2_cln008212|cln008236_cc661	846	3	1	Cited2																																											2	FALSE
spcln2_cln008287|cln008330_cc670	846	3	3	Multiple																																											2	FALSE
spcln2_cln008327|cln008331_cc677	846	3	3	Erg																																											2	FALSE
spcln2_cln008357_cc684	846	3	3	Cebpa																																											2	FALSE
spcln2_cln008357_cc689	846	3	2	Multiple																																											2	FALSE
spcln2_cln008360_cc691	846	3	3	NTC																																											2	FALSE
spcln3_cln000001|cln000008_cc696	846	3	1	Rcor1																																											3	FALSE
spcln3_cln000024_cc699	846	3	3	NTC																																											3	FALSE
spcln3_cln000030|cln000031_cc706	846	3	3	NTC																																											3	FALSE
spcln3_cln000061_cc716	846	3	1	Multiple																																											3	FALSE
spcln3_cln000061_cc717	846	3	2	Multiple																																											3	FALSE
spcln3_cln000101_cc725	846	3	3	Multiple																																											3	FALSE
spcln3_cln000101|cln000114|cln000350_cc728	846	3	3	Multiple																																											3	FALSE
spcln3_cln000145|cln002529_cc735	846	3	3	Multiple																																											3	FALSE
spcln3_cln000145|cln002529_cc737	846	3	2	Multiple																																											3	FALSE
spcln3_cln000145|cln002529_cc738	846	3	2	Multiple																																											3	FALSE
spcln3_cln000176|cln000238_cc745	846	3	2	Multiple																																											3	TRUE
spcln3_cln000202_cc748	846	3	3	Mbd3																																											3	FALSE
spcln3_cln000202_cc752	846	3	3	Mbd3																																											3	FALSE
spcln3_cln000215_cc760	846	3	3	Chd4																																											3	FALSE
spcln3_cln000215_cc762	846	3	2	Chd4																																											3	FALSE
spcln3_cln000264|cln001790_cc770	846	3	3	Atf4																																											3	TRUE
spcln3_cln000295_cc775	846	3	3	Cited4																																											3	FALSE
spcln3_cln000312|cln000482_cc779	846	3	2	Multiple																																											3	FALSE
spcln3_cln000411_cc793	846	3	3	Cebpa																																											3	FALSE
spcln3_cln000414|cln001277_cc797	846	3	3	Multiple																																											3	FALSE
spcln3_cln000414|cln001277|cln001875_cc800	846	3	2	Multiple																																											3	FALSE
spcln3_cln000443_cc802	846	3	3	Cited4																																											3	FALSE
spcln3_cln000443_cc804	846	3	2	Cited4																																											3	FALSE
spcln3_cln000559_cc805	846	3	3	Hdac3																																											3	FALSE
spcln3_cln000559_cc806	846	3	2	Hdac3																																											3	FALSE
spcln3_cln000595_cc817	846	3	2	Multiple																																											3	FALSE
spcln3_cln000595|cln000596_cc819	846	3	3	Multiple																																											3	FALSE
spcln3_cln000595|cln000596_cc822	846	3	3	Multiple																																											3	FALSE
spcln3_cln000651_cc829	846	3	2	Mbd3																																											3	FALSE
spcln3_cln000660_cc838	846	3	3	Mbd2																																											3	FALSE
spcln3_cln000660_cc840	846	3	1	Mbd2																																											3	FALSE
spcln3_cln000753|cln000786|cln000787|cln000792_cc859	846	3	3	Multiple																																											3	FALSE
spcln3_cln000757_cc861	846	3	2	Multiple																																											3	FALSE
spcln3_cln000757_cc863	846	3	3	Multiple																																											3	FALSE
spcln3_cln000757_cc865	846	3	2	Multiple																																											3	FALSE
spcln3_cln000800_cc873	846	3	3	NTC																																											3	FALSE
spcln3_cln000867_cc879	846	3	1	Cited2																																											3	FALSE
spcln3_cln000876|cln000896_cc884	846	3	2	Multiple																																											3	FALSE
spcln3_cln000876|cln000896_cc887	846	3	2	Mbd2																																											3	FALSE
spcln3_cln001010|cln001297_cc898	846	3	2	Ebf1																																											3	FALSE
spcln3_cln001018|cln001087_cc905	846	3	1	Gltscr1																																											3	FALSE
spcln3_cln001018|cln001087_cc907	846	3	3	Gltscr1																																											3	FALSE
spcln3_cln001018|cln001087_cc908	846	3	3	Gltscr1																																											3	FALSE
spcln3_cln001018|cln001087_cc912	846	3	2	Multiple																																											3	FALSE
spcln3_cln001054_cc919	846	3	2	NTC																																											3	FALSE
spcln3_cln001066_cc923	846	3	2	Cebpb																																											3	FALSE
spcln3_cln001078|cln001167_cc931	846	3	3	Multiple																																											3	FALSE
spcln3_cln001087_cc934	846	3	3	Gltscr1																																											3	FALSE
spcln3_cln001113_cc935	846	3	2	Irf8																																											3	FALSE
spcln3_cln001113_cc936	846	3	2	Irf8																																											3	FALSE
spcln3_cln001289_cc957	846	3	2	Multiple																																											3	FALSE
spcln3_cln001312|cln003504_cc964	846	3	2	Cebpa																																											3	FALSE
spcln3_cln001312|cln003504_cc967	846	3	3	Cebpa																																											3	FALSE
spcln3_cln001580|cln001599_cc987	846	3	2	Multiple																																											3	FALSE
spcln3_cln002145_cc998	846	3	1	Mbd3																																											3	FALSE
spcln3_cln002175|cln002741|cln004230_cc1006	846	3	1	Pax5																																											3	FALSE
spcln3_cln002175|cln004230_cc1007	846	3	2	Multiple																																											3	FALSE
spcln3_cln002381|cln004301_cc1016	846	3	2	Mbd2																																											3	FALSE
spcln3_cln002381|cln004301_cc1017	846	3	1	Mbd2																																											3	FALSE
spcln3_cln002468_cc1026	846	3	2	Kmt2d																																											3	FALSE
spcln3_cln002563_cc1038	846	3	2	Pax5																																											3	FALSE
spcln3_cln002563_cc1041	846	3	2	Pax5																																											3	FALSE
spcln3_cln002602|cln003926_cc1043	846	3	3	Multiple																																											3	FALSE
spcln3_cln002638_cc1045	846	3	3	Hdac1																																											3	FALSE
spcln3_cln002638_cc1046	846	3	3	Hdac1																																											3	FALSE
spcln3_cln002647|cln002648_cc1060	846	3	1	Meis1																																											3	FALSE
spcln3_cln003134_cc1067	846	3	2	Rcor1																																											3	FALSE
spcln3_cln003134_cc1068	846	3	2	Rcor1																																											3	FALSE
spcln3_cln003134_cc1070	846	3	3	Rcor1																																											3	FALSE
spcln3_cln003377_cc1073	846	3	3	NTC																																											3	FALSE
spcln3_cln003377_cc1080	846	3	1	NTC																																											3	FALSE
spcln3_cln003377_cc1081	846	3	2	NTC																																											3	FALSE
spcln3_cln003378_cc1085	846	3	2	Cebpa																																											3	FALSE
spcln3_cln003378_cc1087	846	3	3	Cebpa																																											3	FALSE
spcln3_cln003378_cc1090	846	3	2	Cebpa																																											3	FALSE
spcln3_cln003378_cc1093	846	3	2	Cebpa																																											3	FALSE
spcln3_cln003612_cc1101	846	3	3	Multiple																																											3	FALSE
spcln3_cln003612|cln008075_cc1103	846	3	2	NTC																																											3	FALSE
spcln3_cln003870_cc1108	846	3	2	Gata1																																											3	FALSE
spcln3_cln004140|cln004405|cln007124_cc1121	846	3	2	Multiple																																											3	FALSE
spcln3_cln004140|cln004405|cln007124_cc1122	846	3	2	Multiple																																											3	FALSE
spcln3_cln004211|cln004212|cln008360_cc1124	846	3	1	NTC																																											3	FALSE
spcln3_cln004357_cc1127	846	3	3	Mbd2																																											3	FALSE
spcln3_cln004373_cc1133	846	3	2	Cited4																																											3	FALSE
spcln3_cln006693_cc1144	846	3	3	Gata1																																											3	FALSE
spcln3_cln007335_cc1177	846	3	3	Tal1																																											3	FALSE
spcln3_cln007336_cc1180	846	3	3	Multiple																																											3	FALSE
spcln3_cln008245_cc1193	846	3	2	NTC																																											3	FALSE
spcln3_cln008277|cln008281_cc1197	846	3	3	Multiple																																											3	FALSE
spcln3_cln008292_cc1210	846	3	1	Cebpa																																											3	FALSE
spcln3_cln008317_cc1211	846	3	2	Cebpe																																											3	FALSE
spcln3_cln008357_cc1219	846	3	1	Cebpa																																											3	FALSE
spcln3_cln008357_cc1222	846	3	1	Cebpa																																											3	FALSE
spcln3_cln008360_cc1224	846	3	2	Multiple																																											3	FALSE
spcln3_cln008360_cc1227	846	3	2	NTC																																											3	FALSE
spcln3_cln008362_cc1236	846	3	1	Cebpa																																											3	FALSE
spcln3_cln008362_cc1237	846	3	2	Cebpa																																											3	FALSE
spcln3_cln008362_cc1238	846	3	1	Multiple																																											3	FALSE
spcln3_cln008851_cc1239	846	3	2	Hhex																																											3	FALSE
spcln3_cln008851_cc1241	846	3	2	Hhex																																											3	FALSE
spcln3_cln008851_cc1245	846	3	2	Hhex																																											3	FALSE
spcln4_cln000030|cln000031_cc1248	846	3	2	Multiple																																											4	FALSE
spcln4_cln000030|cln000031_cc1249	846	3	3	Multiple																																											4	FALSE
spcln4_cln000040|cln000717|cln000723_cc1254	846	3	3	Multiple																																											4	FALSE
spcln4_cln000052_cc1256	846	3	3	Cebpe																																											4	FALSE
spcln4_cln000202_cc1262	846	3	3	Mbd3																																											4	FALSE
spcln4_cln000215_cc1272	846	3	2	Chd4																																											4	FALSE
spcln4_cln000313|cln002145_cc1273	846	3	3	Mbd3																																											4	FALSE
spcln4_cln000321_cc1275	846	3	3	Pax5																																											4	FALSE
spcln4_cln000347|cln000385_cc1280	846	3	3	Multiple																																											4	FALSE
spcln4_cln000597|cln000658_cc1293	846	3	3	Mbd3																																											4	FALSE
spcln4_cln000651_cc1295	846	3	2	Mbd3																																											4	FALSE
spcln4_cln000660_cc1304	846	3	3	Mbd2																																											4	FALSE
spcln4_cln000660_cc1308	846	3	2	Mbd2																																											4	FALSE
spcln4_cln000660_cc1309	846	3	2	Mbd2																																											4	FALSE
spcln4_cln000670_cc1316	846	3	2	NTC																																											4	FALSE
spcln4_cln000677|cln000832_cc1317	846	3	3	Hhex																																											4	FALSE
spcln4_cln000725|cln002206_cc1322	846	3	3	Multiple																																											4	FALSE
spcln4_cln000757_cc1330	846	3	2	Multiple																																											4	FALSE
spcln4_cln000757_cc1332	846	3	1	Multiple																																											4	FALSE
spcln4_cln000844_cc1333	846	3	3	NTC																																											4	TRUE
spcln4_cln001182_cc1346	846	3	2	NTC																																											4	FALSE
spcln4_cln001406_cc1356	846	3	3	NTC																																											4	FALSE
spcln4_cln002563_cc1378	846	3	2	Pax5																																											4	FALSE
spcln4_cln002563_cc1379	846	3	2	Pax5																																											4	FALSE
spcln4_cln002563_cc1382	846	3	2	Pax5																																											4	FALSE
spcln4_cln002647|cln002648_cc1386	846	3	1	Multiple																																											4	FALSE
spcln4_cln002647|cln002648_cc1388	846	3	3	Meis1																																											4	FALSE
spcln4_cln003567|cln003692_cc1401	846	3	3	Multiple																																											4	FALSE
spcln4_cln004342_cc1409	846	3	3	Pax5																																											4	FALSE
spcln4_cln004357_cc1412	846	3	1	Mbd2																																											4	FALSE
spcln4_cln004357_cc1413	846	3	3	Mbd2																																											4	FALSE
spcln4_cln004373_cc1416	846	3	3	Cited4																																											4	FALSE
spcln4_cln006078_cc1418	846	3	1	Phf10																																											4	FALSE
spcln4_cln007198_cc1432	846	3	2	NTC																																											4	FALSE
spcln4_cln007228_cc1437	846	3	2	Cebpa																																											4	FALSE
spcln4_cln007681|cln008128_cc1441	846	3	3	Kmt2d																																											4	FALSE
spcln4_cln008245_cc1443	846	3	3	NTC																																											4	FALSE
spcln4_cln008357_cc1449	846	3	2	Cebpa																																											4	FALSE
spcln4_cln008357_cc1450	846	3	3	Cebpa																																											4	FALSE
spcln4_cln008851_cc1462	846	3	3	Hhex																																											4	FALSE
spcln4_cln008851_cc1464	846	3	2	Hhex																																											4	FALSE
spcln5_cln000030|cln000031_cc1470	846	3	2	NTC																																											5	FALSE
spcln5_cln000030|cln000031_cc1471	846	3	2	NTC																																											5	FALSE
spcln5_cln000233_cc1492	846	3	2	Phf10																																											5	FALSE
spcln5_cln000233_cc1493	846	3	3	Phf10																																											5	FALSE
spcln5_cln000233_cc1494	846	3	3	Phf10																																											5	FALSE
spcln5_cln000651_cc1515	846	3	1	Mbd3																																											5	FALSE
spcln5_cln000660_cc1516	846	3	1	Mbd2																																											5	FALSE
spcln5_cln000677|cln000832_cc1522	846	3	2	Hhex																																											5	FALSE
spcln5_cln001210_cc1530	846	3	2	Gltscr1																																											5	FALSE
spcln5_cln001791|cln002644_cc1543	846	3	3	Ebf1																																											5	FALSE
spcln5_cln002381|cln004301_cc1552	846	3	1	Mbd2																																											5	FALSE
spcln5_cln002526|cln002649_cc1562	846	3	3	Rcor1																																											5	FALSE
spcln5_cln002563_cc1565	846	3	2	Pax5																																											5	FALSE
spcln5_cln002604_cc1567	846	3	1	Rcor1																																											5	FALSE
spcln5_cln002638_cc1570	846	3	2	Hdac1																																											5	FALSE
spcln5_cln002684|cln004192|cln004402_cc1575	846	3	2	Multiple																																											5	FALSE
spcln5_cln002684|cln004192|cln004402_cc1577	846	3	3	Multiple																																											5	FALSE
spcln5_cln003728|cln003748|cln003887|cln007304_cc1581	846	3	3	Multiple																																											5	FALSE
spcln5_cln004373_cc1587	846	3	2	Cited4																																											5	FALSE
spcln5_cln007228_cc1589	846	3	3	Cebpa																																											5	FALSE
spcln5_cln008357_cc1592	846	3	3	Cebpa																																											5	FALSE
spcln618_bcsplit8_cc0	846	3	2	Cebpa																																											1	FALSE
spcln622_bcsplit1_cc1	846	3	2	Cebpa																																											3	FALSE
spcln622_bcsplit4	846	3	1	Cebpa																																											3	FALSE
spcln642_bcsplit0	846	3	3	Mbd2																																											5	FALSE
spcln644_bcsplit1_cc0	846	3	3	Meis1																																											3	FALSE
spcln647_cc2	846	3	3	NTC																																											2	FALSE
spcln648_cc2	846	3	3	NTC																																											3	FALSE
spcln664_bcsplit5	846	3	2	Rcor1																																											2	FALSE
spcln666	846	3	2	Rcor1																																											4	FALSE
spcln1_cln000001|cln000008_cc0	846	2	2	Multiple																																											1	FALSE
spcln1_cln000024_cc6	846	2	2	NTC																																											1	FALSE
spcln1_cln000040|cln000914_cc11	846	2	2	Multiple																																											1	FALSE
spcln1_cln000052_cc12	846	2	2	Cebpe																																											1	FALSE
spcln1_cln000052_cc13	846	2	1	Cebpe																																											1	FALSE
spcln1_cln000057_cc14	846	2	1	Multiple																																											1	FALSE
spcln1_cln000057|cln000498|cln000499_cc17	846	2	2	Multiple																																											1	FALSE
spcln1_cln000057|cln000827_cc18	846	2	1	Gata1																																											1	FALSE
spcln1_cln000066_cc20	846	2	2	Cebpb																																											1	FALSE
spcln1_cln000066_cc21	846	2	2	Cebpb																																											1	FALSE
spcln1_cln000066_cc22	846	2	2	Cebpb																																											1	FALSE
spcln1_cln000165_cc24	846	2	2	Erg																																											1	FALSE
spcln1_cln000168|cln000196|cln000272|cln000275_cc26	846	2	2	Multiple																																											1	FALSE
spcln1_cln000176|cln000238_cc27	846	2	1	Multiple																																											1	TRUE
spcln1_cln000176|cln000238_cc28	846	2	2	Multiple																																											1	TRUE
spcln1_cln000176|cln000238_cc29	846	2	2	Multiple																																											1	FALSE
spcln1_cln000176|cln000238_cc30	846	2	1	Multiple																																											1	FALSE
spcln1_cln000202_cc33	846	2	2	Mbd3																																											1	FALSE
spcln1_cln000202_cc36	846	2	1	Mbd3																																											1	FALSE
spcln1_cln000233_cc37	846	2	2	Phf10																																											1	FALSE
spcln1_cln000234|cln000432_cc38	846	2	2	Multiple																																											1	FALSE
spcln1_cln000234|cln000432|cln000664_cc40	846	2	2	Multiple																																											1	FALSE
spcln1_cln000234|cln000432|cln000664_cc44	846	2	2	NTC																																											1	FALSE
spcln1_cln000296|cln000783|cln001043_cc47	846	2	1	Multiple																																											1	TRUE
spcln1_cln000312|cln000482_cc50	846	2	2	Multiple																																											1	FALSE
spcln1_cln000312|cln000482_cc51	846	2	2	Multiple																																											1	FALSE
spcln1_cln000312|cln000482_cc52	846	2	2	Multiple																																											1	FALSE
spcln1_cln000313_cc53	846	2	2	Rcor1																																											1	FALSE
spcln1_cln000328|cln000329_cc55	846	2	2	NTC																																											1	FALSE
spcln1_cln000328|cln000329_cc56	846	2	2	NTC																																											1	FALSE
spcln1_cln000328|cln000329_cc58	846	2	2	NTC																																											1	FALSE
spcln1_cln000328|cln000329_cc60	846	2	1	NTC																																											1	FALSE
spcln1_cln000329_cc61	846	2	2	NTC																																											1	FALSE
spcln1_cln000347|cln000385_cc62	846	2	2	Multiple																																											1	FALSE
spcln1_cln000404|cln002638_cc64	846	2	2	Multiple																																											1	FALSE
spcln1_cln000411_cc68	846	2	1	Cebpa																																											1	FALSE
spcln1_cln000411_cc70	846	2	1	Multiple																																											1	FALSE
spcln1_cln000413_cc71	846	2	2	Cebpa																																											1	FALSE
spcln1_cln000414|cln001277_cc72	846	2	2	Multiple																																											1	FALSE
spcln1_cln000414|cln001277_cc73	846	2	1	Multiple																																											1	FALSE
spcln1_cln000451_cc74	846	2	2	Brd9																																											1	FALSE
spcln1_cln000456_cc75	846	2	2	Runx1																																											1	FALSE
spcln1_cln000508|cln000565_cc78	846	2	2	Multiple																																											1	FALSE
spcln1_cln000573|cln001783_cc81	846	2	2	Multiple																																											1	FALSE
spcln1_cln000574_cc82	846	2	1	Phf10																																											1	FALSE
spcln1_cln000597|cln000658_cc83	846	2	2	Mbd3																																											1	FALSE
spcln1_cln000655_cc85	846	2	1	Irf8																																											1	FALSE
spcln1_cln000660_cc89	846	2	2	Mbd2																																											1	FALSE
spcln1_cln000668_cc90	846	2	1	Irf8																																											1	FALSE
spcln1_cln000670_cc91	846	2	2	NTC																																											1	FALSE
spcln1_cln000677|cln000832_cc92	846	2	2	Multiple																																											1	FALSE
spcln1_cln000722_cc95	846	2	2	Kmt2a																																											1	FALSE
spcln1_cln000757_cc99	846	2	2	Multiple																																											1	FALSE
spcln1_cln000783|cln001043_cc100	846	2	1	Cbx3																																											1	FALSE
spcln1_cln000783|cln001043_cc101	846	2	2	Cbx3																																											1	FALSE
spcln1_cln000867_cc103	846	2	2	Cited2																																											1	FALSE
spcln1_cln000876|cln000896_cc104	846	2	2	Multiple																																											1	FALSE
spcln1_cln000876|cln000896_cc105	846	2	2	Mbd2																																											1	FALSE
spcln1_cln000888|cln005069|cln007126|cln008372_cc107	846	2	1	Chd4																																											1	FALSE
spcln1_cln001018|cln001087_cc112	846	2	2	Gltscr1																																											1	FALSE
spcln1_cln001018|cln001087_cc113	846	2	1	Gltscr1																																											1	FALSE
spcln1_cln001066_cc123	846	2	2	Cebpb																																											1	FALSE
spcln1_cln001066_cc124	846	2	1	Cebpb																																											1	FALSE
spcln1_cln001066_cc129	846	2	1	Cebpb																																											1	FALSE
spcln1_cln001066_cc133	846	2	1	Cebpb																																											1	FALSE
spcln1_cln001113_cc134	846	2	2	Irf8																																											1	FALSE
spcln1_cln001146_cc135	846	2	1	Cebpe																																											1	FALSE
spcln1_cln001202|cln001289_cc139	846	2	2	Multiple																																											1	FALSE
spcln1_cln001202|cln001289_cc140	846	2	2	Multiple																																											1	FALSE
spcln1_cln001202|cln001289_cc141	846	2	2	Multiple																																											1	FALSE
spcln1_cln001202|cln001289_cc142	846	2	2	Multiple																																											1	FALSE
spcln1_cln001202|cln001289_cc143	846	2	2	Multiple																																											1	FALSE
spcln1_cln001202|cln001289_cc144	846	2	2	Multiple																																											1	FALSE
spcln1_cln001255|cln003625|cln003641_cc148	846	2	1	Multiple																																											1	FALSE
spcln1_cln001279|cln001280_cc152	846	2	2	Cited4																																											1	FALSE
spcln1_cln001279|cln001280_cc154	846	2	2	Multiple																																											1	FALSE
spcln1_cln001279|cln001280_cc157	846	2	2	Multiple																																											1	FALSE
spcln1_cln001279|cln001280_cc159	846	2	1	Multiple																																											1	FALSE
spcln1_cln001304_cc160	846	2	1	Runx1																																											1	FALSE
spcln1_cln001312|cln002140|cln003504_cc161	846	2	2	Multiple																																											1	FALSE
spcln1_cln001312|cln003504_cc165	846	2	1	Cebpa																																											1	FALSE
spcln1_cln001312|cln003504_cc166	846	2	1	Cebpa																																											1	FALSE
spcln1_cln001312|cln003504_cc168	846	2	2	Cebpa																																											1	FALSE
spcln1_cln001432_cc171	846	2	2	Multiple																																											1	FALSE
spcln1_cln001432_cc172	846	2	2	Multiple																																											1	FALSE
spcln1_cln001479_cc179	846	2	2	Klf1																																											1	FALSE
spcln1_cln001483|cln003130_cc180	846	2	1	Brd9																																											1	FALSE
spcln1_cln001661|cln001669_cc183	846	2	2	Mbd2																																											1	FALSE
spcln1_cln001720_cc185	846	2	2	Multiple																																											1	FALSE
spcln1_cln001720|cln002688_cc186	846	2	1	Multiple																																											1	FALSE
spcln1_cln001785_cc191	846	2	1	Cebpa																																											1	FALSE
spcln1_cln001807|cln003537|cln008253_cc193	846	2	1	Multiple																																											1	FALSE
spcln1_cln001963_cc195	846	2	2	Mbd2																																											1	TRUE
spcln1_cln002025_cc196	846	2	2	Gata1																																											1	FALSE
spcln1_cln002140_cc199	846	2	2	Gltscr1																																											1	FALSE
spcln1_cln002175|cln002741|cln004230_cc205	846	2	2	Multiple																																											1	FALSE
spcln1_cln002345|cln007267_cc209	846	2	2	Brd9																																											1	FALSE
spcln1_cln002345|cln007267_cc210	846	2	2	Brd9																																											1	TRUE
spcln1_cln002345|cln007267_cc211	846	2	2	Multiple																																											1	FALSE
spcln1_cln002345|cln007267_cc213	846	2	1	Multiple																																											1	FALSE
spcln1_cln002370_cc217	846	2	1	Multiple																																											1	FALSE
spcln1_cln002376_cc222	846	2	1	NTC																																											1	FALSE
spcln1_cln002418_cc229	846	2	2	Elk4																																											1	FALSE
spcln1_cln002419|cln002580_cc231	846	2	1	Multiple																																											1	FALSE
spcln1_cln002419|cln002580_cc232	846	2	1	Multiple																																											1	FALSE
spcln1_cln002419|cln002580_cc233	846	2	2	Multiple																																											1	FALSE
spcln1_cln002468_cc235	846	2	2	Kmt2d																																											1	FALSE
spcln1_cln002468_cc236	846	2	2	Kmt2d																																											1	FALSE
spcln1_cln002481_cc238	846	2	1	Cebpa																																											1	FALSE
spcln1_cln002481_cc239	846	2	1	Multiple																																											1	FALSE
spcln1_cln002481|cln008279_cc240	846	2	1	Multiple																																											1	FALSE
spcln1_cln002529_cc244	846	2	2	Multiple																																											1	FALSE
spcln1_cln002563_cc245	846	2	2	Pax5																																											1	FALSE
spcln1_cln002563_cc246	846	2	2	Pax5																																											1	FALSE
spcln1_cln002563_cc248	846	2	2	Pax5																																											1	FALSE
spcln1_cln002638_cc249	846	2	1	Hdac1																																											1	FALSE
spcln1_cln002638_cc251	846	2	2	Hdac1																																											1	FALSE
spcln1_cln002638_cc252	846	2	2	Hdac1																																											1	FALSE
spcln1_cln002638_cc253	846	2	1	Hdac1																																											1	FALSE
spcln1_cln002638_cc254	846	2	2	Hdac1																																											1	FALSE
spcln1_cln002638_cc255	846	2	2	Hdac1																																											1	FALSE
spcln1_cln002638_cc256	846	2	2	Hdac1																																											1	FALSE
spcln1_cln002684|cln004192|cln004402_cc257	846	2	2	Multiple																																											1	FALSE
spcln1_cln002688_cc258	846	2	1	NTC																																											1	FALSE
spcln1_cln002688_cc259	846	2	2	NTC																																											1	FALSE
spcln1_cln002688_cc262	846	2	1	NTC																																											1	FALSE
spcln1_cln003377_cc265	846	2	2	Multiple																																											1	FALSE
spcln1_cln003377_cc268	846	2	1	NTC																																											1	FALSE
spcln1_cln003377_cc270	846	2	2	NTC																																											1	FALSE
spcln1_cln003377_cc272	846	2	2	NTC																																											1	FALSE
spcln1_cln003378_cc277	846	2	1	Cebpa																																											1	FALSE
spcln1_cln003378_cc290	846	2	1	Cebpa																																											1	FALSE
spcln1_cln003378_cc293	846	2	2	Cebpa																																											1	FALSE
spcln1_cln003378_cc294	846	2	2	Cebpa																																											1	FALSE
spcln1_cln003378_cc296	846	2	2	Cebpa																																											1	FALSE
spcln1_cln003378_cc297	846	2	2	Cebpa																																											1	FALSE
spcln1_cln003627|cln003629|cln003738|cln008147_cc299	846	2	2	Multiple																																											1	TRUE
spcln1_cln003690|cln003809|cln003869_cc300	846	2	2	Multiple																																											1	FALSE
spcln1_cln003717_cc302	846	2	2	Cebpb																																											1	FALSE
spcln1_cln003809|cln003869_cc305	846	2	2	Multiple																																											1	FALSE
spcln1_cln003809|cln003869_cc307	846	2	1	Multiple																																											1	FALSE
spcln1_cln003869_cc308	846	2	1	Multiple																																											1	FALSE
spcln1_cln003869_cc309	846	2	2	Multiple																																											1	FALSE
spcln1_cln003869_cc310	846	2	2	Multiple																																											1	FALSE
spcln1_cln004300_cc314	846	2	1	Multiple																																											1	FALSE
spcln1_cln004300|cln004398_cc318	846	2	2	Multiple																																											1	FALSE
spcln1_cln004300|cln004398_cc319	846	2	1	Multiple																																											1	FALSE
spcln1_cln004349|cln005069|cln007126|cln008372_cc320	846	2	1	Multiple																																											1	FALSE
spcln1_cln004357_cc321	846	2	1	Multiple																																											1	FALSE
spcln1_cln004373_cc322	846	2	2	Cited4																																											1	FALSE
spcln1_cln004373_cc323	846	2	2	Cited4																																											1	FALSE
spcln1_cln004404_cc329	846	2	2	Smarcd1																																											1	FALSE
spcln1_cln004404_cc332	846	2	2	Smarcd1																																											1	FALSE
spcln1_cln005069_cc333	846	2	2	Hdac1																																											1	FALSE
spcln1_cln005069|cln007126|cln008372_cc335	846	2	2	Multiple																																											1	FALSE
spcln1_cln005069|cln007126|cln008372_cc339	846	2	2	Multiple																																											1	FALSE
spcln1_cln005069|cln007126|cln008372_cc340	846	2	1	Multiple																																											1	FALSE
spcln1_cln005069|cln007126|cln008372_cc343	846	2	2	Multiple																																											1	FALSE
spcln1_cln005237_cc354	846	2	2	Irf8																																											1	FALSE
spcln1_cln005885|cln008358|cln008359_cc357	846	2	2	Multiple																																											1	FALSE
spcln1_cln005885|cln008358|cln008359_cc360	846	2	2	Multiple																																											1	FALSE
spcln1_cln005885|cln008358|cln008359_cc362	846	2	2	Multiple																																											1	FALSE
spcln1_cln005885|cln008358|cln008359_cc366	846	2	2	Multiple																																											1	FALSE
spcln1_cln005885|cln008358|cln008359_cc367	846	2	2	Multiple																																											1	FALSE
spcln1_cln005885|cln008358|cln008359_cc369	846	2	2	Rcor1																																											1	FALSE
spcln1_cln005885|cln008358|cln008359_cc371	846	2	1	Rcor1																																											1	FALSE
spcln1_cln007123_cc374	846	2	2	Atf7ip																																											1	FALSE
spcln1_cln007123_cc375	846	2	2	Atf7ip																																											1	FALSE
spcln1_cln007197|cln007270_cc376	846	2	2	Multiple																																											1	FALSE
spcln1_cln007199_cc377	846	2	2	Wdr82																																											1	FALSE
spcln1_cln007199_cc379	846	2	1	Wdr82																																											1	FALSE
spcln1_cln007199_cc381	846	2	2	Wdr82																																											1	FALSE
spcln1_cln007199_cc384	846	2	2	Wdr82																																											1	FALSE
spcln1_cln007199_cc387	846	2	2	Wdr82																																											1	FALSE
spcln1_cln007199_cc388	846	2	2	Wdr82																																											1	FALSE
spcln1_cln007265_cc389	846	2	2	Cebpa																																											1	FALSE
spcln1_cln007302|cln007303_cc394	846	2	1	Multiple																																											1	FALSE
spcln1_cln007367|cln008295_cc397	846	2	1	Multiple																																											1	FALSE
spcln1_cln007508_cc401	846	2	1	Pax5																																											1	FALSE
spcln1_cln007508_cc402	846	2	2	Pax5																																											1	FALSE
spcln1_cln007683_cc406	846	2	1	Hhex																																											1	FALSE
spcln1_cln008021_cc407	846	2	2	Kmt2d																																											1	FALSE
spcln1_cln008192|cln008203|cln008254|cln008262_cc409	846	2	2	Multiple																																											1	TRUE
spcln1_cln008202_cc410	846	2	1	NTC																																											1	FALSE
spcln1_cln008214|cln008280|cln008291|cln008328|cln008340_cc413	846	2	1	Multiple																																											1	FALSE
spcln1_cln008227|cln008229_cc415	846	2	2	Multiple																																											1	FALSE
spcln1_cln008247_cc417	846	2	2	NTC																																											1	FALSE
spcln1_cln008247_cc418	846	2	1	NTC																																											1	FALSE
spcln1_cln008247_cc419	846	2	2	NTC																																											1	FALSE
spcln1_cln008257_cc420	846	2	2	Hoxa7																																											1	FALSE
spcln1_cln008280|cln008291|cln008328|cln008340_cc421	846	2	2	Multiple																																											1	FALSE
spcln1_cln008290|cln008299_cc423	846	2	1	Multiple																																											1	FALSE
spcln1_cln008318|cln008332|cln008339_cc426	846	2	1	Multiple																																											1	FALSE
spcln1_cln008327|cln008331_cc431	846	2	1	Multiple																																											1	FALSE
spcln1_cln008327|cln008331_cc432	846	2	2	Multiple																																											1	FALSE
spcln1_cln008331_cc434	846	2	1	Erg																																											1	FALSE
spcln1_cln008357_cc435	846	2	1	Cebpa																																											1	FALSE
spcln1_cln008357_cc436	846	2	2	Cebpa																																											1	FALSE
spcln2_cln000001|cln000008_cc438	846	2	2	Multiple																																											2	FALSE
spcln2_cln000024_cc441	846	2	2	NTC																																											2	FALSE
spcln2_cln000045_cc445	846	2	2	Rcor1																																											2	FALSE
spcln2_cln000045_cc446	846	2	1	Rcor1																																											2	FALSE
spcln2_cln000052_cc451	846	2	1	Cebpe																																											2	FALSE
spcln2_cln000052_cc453	846	2	2	Cebpe																																											2	FALSE
spcln2_cln000052_cc454	846	2	2	Cebpe																																											2	FALSE
spcln2_cln000052_cc455	846	2	2	Cebpe																																											2	FALSE
spcln2_cln000057|cln000827_cc456	846	2	2	Gata1																																											2	FALSE
spcln2_cln000061|cln000123_cc457	846	2	1	Multiple																																											2	FALSE
spcln2_cln000101_cc458	846	2	1	Multiple																																											2	FALSE
spcln2_cln000104|cln000141_cc459	846	2	2	Multiple																																											2	FALSE
spcln2_cln000168|cln000196|cln000272|cln008327_cc460	846	2	2	Multiple																																											2	FALSE
spcln2_cln000234|cln000432|cln000664_cc465	846	2	2	NTC																																											2	FALSE
spcln2_cln000284|cln000349_cc466	846	2	1	Cebpa																																											2	FALSE
spcln2_cln000312|cln000482_cc468	846	2	2	Multiple																																											2	FALSE
spcln2_cln000313_cc471	846	2	2	Rcor1																																											2	FALSE
spcln2_cln000328|cln000329_cc474	846	2	1	Multiple																																											2	FALSE
spcln2_cln000328|cln000329_cc477	846	2	2	NTC																																											2	FALSE
spcln2_cln000328|cln000329|cln001661|cln001669_cc478	846	2	2	Mbd2																																											2	FALSE
spcln2_cln000338_cc480	846	2	2	Multiple																																											2	FALSE
spcln2_cln000347|cln000385_cc481	846	2	2	Multiple																																											2	FALSE
spcln2_cln000404_cc482	846	2	2	Cebpa																																											2	FALSE
spcln2_cln000414|cln001277_cc491	846	2	2	Multiple																																											2	FALSE
spcln2_cln000414|cln001277_cc492	846	2	2	Multiple																																											2	FALSE
spcln2_cln000414|cln001277|cln001875_cc494	846	2	2	Multiple																																											2	FALSE
spcln2_cln000443_cc496	846	2	2	Cited4																																											2	FALSE
spcln2_cln000456_cc497	846	2	2	Runx1																																											2	TRUE
spcln2_cln000508|cln000565_cc498	846	2	2	Multiple																																											2	FALSE
spcln2_cln000508|cln000565_cc499	846	2	1	Multiple																																											2	FALSE
spcln2_cln000508|cln000565_cc500	846	2	2	Multiple																																											2	FALSE
spcln2_cln000574_cc504	846	2	2	Phf10																																											2	FALSE
spcln2_cln000595|cln000596_cc505	846	2	2	Multiple																																											2	FALSE
spcln2_cln000660_cc507	846	2	2	Mbd2																																											2	FALSE
spcln2_cln000660_cc509	846	2	2	Mbd2																																											2	FALSE
spcln2_cln000751_cc512	846	2	1	Mbd3																																											2	FALSE
spcln2_cln000757_cc513	846	2	2	Multiple																																											2	FALSE
spcln2_cln000757_cc514	846	2	2	Multiple																																											2	FALSE
spcln2_cln000757_cc515	846	2	2	Multiple																																											2	FALSE
spcln2_cln000757|cln001312|cln003504_cc517	846	2	2	Multiple																																											2	FALSE
spcln2_cln000867_cc518	846	2	2	Cited2																																											2	FALSE
spcln2_cln000966|cln001185_cc519	846	2	1	Multiple																																											2	FALSE
spcln2_cln001018|cln001087_cc520	846	2	2	Gltscr1																																											2	FALSE
spcln2_cln001066_cc523	846	2	2	Cebpb																																											2	FALSE
spcln2_cln001078|cln001167_cc524	846	2	1	Multiple																																											2	FALSE
spcln2_cln001113_cc525	846	2	1	Irf8																																											2	FALSE
spcln2_cln001202|cln001289_cc529	846	2	1	Multiple																																											2	FALSE
spcln2_cln001202|cln001289_cc531	846	2	1	Multiple																																											2	FALSE
spcln2_cln001202|cln001289_cc532	846	2	2	Multiple																																											2	FALSE
spcln2_cln001202|cln001289_cc533	846	2	2	Multiple																																											2	FALSE
spcln2_cln001210_cc534	846	2	1	Multiple																																											2	FALSE
spcln2_cln001255|cln002383|cln003625|cln003641_cc536	846	2	1	Multiple																																											2	FALSE
spcln2_cln001279|cln001280_cc537	846	2	1	Multiple																																											2	FALSE
spcln2_cln001289_cc541	846	2	2	Multiple																																											2	FALSE
spcln2_cln001312|cln003504_cc542	846	2	1	Multiple																																											2	FALSE
spcln2_cln001312|cln003504_cc546	846	2	2	Cebpa																																											2	FALSE
spcln2_cln001432_cc550	846	2	1	Multiple																																											2	FALSE
spcln2_cln001479_cc557	846	2	1	Chd4																																											2	FALSE
spcln2_cln001479_cc558	846	2	1	Chd4																																											2	FALSE
spcln2_cln001479_cc559	846	2	2	Chd4																																											2	FALSE
spcln2_cln001479_cc560	846	2	2	Chd4																																											2	FALSE
spcln2_cln001661|cln001669_cc566	846	2	1	Mbd2																																											2	FALSE
spcln2_cln001731_cc569	846	2	2	Multiple																																											2	FALSE
spcln2_cln001731|cln003880_cc571	846	2	1	Multiple																																											2	FALSE
spcln2_cln001731|cln003880_cc573	846	2	2	Multiple																																											2	FALSE
spcln2_cln001731|cln003880_cc574	846	2	2	Multiple																																											2	FALSE
spcln2_cln001780_cc575	846	2	1	Setdb1																																											2	FALSE
spcln2_cln001785|cln002025|cln008279_cc576	846	2	1	Multiple																																											2	FALSE
spcln2_cln002140_cc585	846	2	1	Gltscr1																																											2	FALSE
spcln2_cln002140|cln008440_cc586	846	2	1	Gltscr1																																											2	FALSE
spcln2_cln002347_cc587	846	2	2	Men1																																											2	FALSE
spcln2_cln002418_cc597	846	2	1	Multiple																																											2	TRUE
spcln2_cln002468_cc598	846	2	1	Kmt2d																																											2	FALSE
spcln2_cln002481_cc599	846	2	2	Multiple																																											2	FALSE
spcln2_cln002503_cc601	846	2	1	Runx1																																											2	FALSE
spcln2_cln002563_cc602	846	2	1	Pax5																																											2	FALSE
spcln2_cln002563_cc603	846	2	2	Pax5																																											2	FALSE
spcln2_cln002563_cc604	846	2	2	Pax5																																											2	FALSE
spcln2_cln002638_cc606	846	2	2	Hdac1																																											2	FALSE
spcln2_cln002638_cc607	846	2	2	Hdac1																																											2	FALSE
spcln2_cln002647|cln002648_cc608	846	2	2	Multiple																																											2	FALSE
spcln2_cln003377_cc611	846	2	2	NTC																																											2	FALSE
spcln2_cln003377_cc615	846	2	2	NTC																																											2	FALSE
spcln2_cln003378_cc621	846	2	1	Cebpa																																											2	FALSE
spcln2_cln003378_cc623	846	2	2	Cebpa																																											2	FALSE
spcln2_cln003378_cc625	846	2	2	Cebpa																																											2	FALSE
spcln2_cln003378_cc626	846	2	2	Cebpa																																											2	FALSE
spcln2_cln003801|cln007290|cln007291_cc629	846	2	1	NTC																																											2	FALSE
spcln2_cln003809|cln003869_cc630	846	2	2	Multiple																																											2	FALSE
spcln2_cln003869_cc631	846	2	1	Multiple																																											2	FALSE
spcln2_cln003921_cc633	846	2	1	Cebpb																																											2	FALSE
spcln2_cln004276_cc636	846	2	1	Gltscr1																																											2	FALSE
spcln2_cln005069|cln007126|cln008372_cc640	846	2	1	Multiple																																											2	FALSE
spcln2_cln005069|cln007126|cln008372_cc641	846	2	1	Multiple																																											2	FALSE
spcln2_cln005069|cln007126|cln008372_cc642	846	2	2	Multiple																																											2	FALSE
spcln2_cln005069|cln007126|cln008372_cc643	846	2	1	Multiple																																											2	FALSE
spcln2_cln005069|cln007126|cln008372_cc645	846	2	2	Multiple																																											2	FALSE
spcln2_cln006693_cc648	846	2	2	Gata1																																											2	FALSE
spcln2_cln006693_cc649	846	2	1	Gata1																																											2	FALSE
spcln2_cln006693_cc650	846	2	2	Gata1																																											2	FALSE
spcln2_cln006693_cc651	846	2	1	Gata1																																											2	FALSE
spcln2_cln006693_cc652	846	2	2	Gata1																																											2	FALSE
spcln2_cln006856|cln007004|cln007034|cln007177|cln007178_cc653	846	2	2	Multiple																																											2	FALSE
spcln2_cln007125_cc654	846	2	1	NTC																																											2	FALSE
spcln2_cln007199_cc656	846	2	1	Wdr82																																											2	FALSE
spcln2_cln007508_cc658	846	2	2	Pax5																																											2	FALSE
spcln2_cln007517|cln007623_cc659	846	2	1	Cited4																																											2	FALSE
spcln2_cln008140_cc660	846	2	2	Rcor1																																											2	TRUE
spcln2_cln008223|cln008242_cc662	846	2	2	Multiple																																											2	FALSE
spcln2_cln008257_cc663	846	2	1	Hoxa7																																											2	FALSE
spcln2_cln008257_cc664	846	2	2	Hoxa7																																											2	FALSE
spcln2_cln008265_cc665	846	2	2	Smarcd2																																											2	FALSE
spcln2_cln008285|cln008298_cc669	846	2	2	Hdac1																																											2	FALSE
spcln2_cln008318|cln008332|cln008339_cc672	846	2	2	Multiple																																											2	FALSE
spcln2_cln008318|cln008332|cln008339_cc673	846	2	1	Multiple																																											2	FALSE
spcln2_cln008318|cln008332|cln008339_cc674	846	2	1	Multiple																																											2	FALSE
spcln2_cln008327|cln008331_cc675	846	2	2	Erg																																											2	FALSE
spcln2_cln008327|cln008331_cc676	846	2	1	Erg																																											2	FALSE
spcln2_cln008327|cln008331_cc680	846	2	2	Multiple																																											2	FALSE
spcln2_cln008327|cln008331_cc681	846	2	1	Multiple																																											2	FALSE
spcln2_cln008357_cc682	846	2	1	Cebpa																																											2	FALSE
spcln2_cln008357_cc683	846	2	1	Cebpa																																											2	FALSE
spcln2_cln008357_cc685	846	2	2	Cebpa																																											2	FALSE
spcln2_cln008357_cc686	846	2	2	Cebpa																																											2	FALSE
spcln2_cln008357_cc687	846	2	2	Cebpa																																											2	FALSE
spcln2_cln008357_cc688	846	2	1	Multiple																																											2	FALSE
spcln2_cln008360_cc690	846	2	2	NTC																																											2	FALSE
spcln3_cln000001|cln000008_cc692	846	2	2	Multiple																																											3	FALSE
spcln3_cln000001|cln000008_cc693	846	2	2	Multiple																																											3	FALSE
spcln3_cln000001|cln000008_cc694	846	2	2	Multiple																																											3	FALSE
spcln3_cln000001|cln000008_cc695	846	2	2	Multiple																																											3	FALSE
spcln3_cln000024_cc697	846	2	1	NTC																																											3	FALSE
spcln3_cln000024_cc700	846	2	1	NTC																																											3	FALSE
spcln3_cln000030|cln000031_cc703	846	2	1	Multiple																																											3	FALSE
spcln3_cln000030|cln000031_cc704	846	2	2	Multiple																																											3	FALSE
spcln3_cln000040|cln000717|cln000723_cc708	846	2	2	Multiple																																											3	FALSE
spcln3_cln000052_cc712	846	2	1	Cebpe																																											3	TRUE
spcln3_cln000057|cln000498|cln000499_cc713	846	2	1	Multiple																																											3	FALSE
spcln3_cln000057|cln000498|cln000499_cc714	846	2	1	Multiple																																											3	FALSE
spcln3_cln000057|cln000827_cc715	846	2	2	Gata1																																											3	FALSE
spcln3_cln000061_cc719	846	2	2	Multiple																																											3	FALSE
spcln3_cln000061_cc720	846	2	1	Multiple																																											3	FALSE
spcln3_cln000081|cln000088_cc723	846	2	1	Cebpb																																											3	FALSE
spcln3_cln000081|cln000088_cc724	846	2	1	Cebpb																																											3	FALSE
spcln3_cln000101_cc726	846	2	2	Multiple																																											3	FALSE
spcln3_cln000101|cln004413_cc729	846	2	1	Multiple																																											3	FALSE
spcln3_cln000108_cc731	846	2	2	Rcor1																																											3	FALSE
spcln3_cln000123_cc732	846	2	2	Multiple																																											3	FALSE
spcln3_cln000123_cc733	846	2	2	Multiple																																											3	FALSE
spcln3_cln000145|cln002529_cc734	846	2	2	Multiple																																											3	FALSE
spcln3_cln000165_cc739	846	2	2	Erg																																											3	FALSE
spcln3_cln000165|cln001780_cc740	846	2	1	Setdb1																																											3	FALSE
spcln3_cln000168|cln000196|cln000272|cln000275_cc742	846	2	2	Multiple																																											3	FALSE
spcln3_cln000176|cln000238_cc746	846	2	2	Multiple																																											3	FALSE
spcln3_cln000202_cc750	846	2	2	Mbd3																																											3	FALSE
spcln3_cln000202_cc751	846	2	2	Mbd3																																											3	FALSE
spcln3_cln000215_cc756	846	2	2	Chd4																																											3	FALSE
spcln3_cln000215_cc757	846	2	2	Chd4																																											3	FALSE
spcln3_cln000215_cc758	846	2	2	Chd4																																											3	FALSE
spcln3_cln000215_cc759	846	2	2	Chd4																																											3	FALSE
spcln3_cln000215_cc761	846	2	1	Chd4																																											3	FALSE
spcln3_cln000234|cln000432|cln000664_cc764	846	2	2	NTC																																											3	FALSE
spcln3_cln000234|cln000432|cln000664_cc765	846	2	1	NTC																																											3	FALSE
spcln3_cln000234|cln000432|cln000664_cc766	846	2	2	NTC																																											3	FALSE
spcln3_cln000234|cln000432|cln000664_cc767	846	2	2	NTC																																											3	FALSE
spcln3_cln000234|cln000432|cln000664_cc768	846	2	1	NTC																																											3	FALSE
spcln3_cln000234|cln000432|cln000664|cln001202|cln001289|cln003573_cc769	846	2	1	Multiple																																											3	FALSE
spcln3_cln000264|cln001790_cc771	846	2	2	Atf4																																											3	FALSE
spcln3_cln000264|cln001790_cc772	846	2	2	Atf4																																											3	FALSE
spcln3_cln000264|cln001790_cc773	846	2	2	Atf4																																											3	FALSE
spcln3_cln000312|cln000482_cc777	846	2	1	Multiple																																											3	FALSE
spcln3_cln000312|cln000482_cc778	846	2	2	Multiple																																											3	FALSE
spcln3_cln000312|cln000482_cc780	846	2	2	Multiple																																											3	FALSE
spcln3_cln000328|cln000329_cc782	846	2	2	NTC																																											3	FALSE
spcln3_cln000330|cln000374_cc783	846	2	2	Cebpa																																											3	FALSE
spcln3_cln000332_cc784	846	2	1	Multiple																																											3	FALSE
spcln3_cln000404_cc790	846	2	2	Cebpa																																											3	FALSE
spcln3_cln000406|cln001018|cln001087_cc792	846	2	1	Multiple																																											3	FALSE
spcln3_cln000411_cc794	846	2	1	Cebpa																																											3	FALSE
spcln3_cln000411_cc795	846	2	2	Cebpa																																											3	FALSE
spcln3_cln000414|cln001277_cc796	846	2	2	Multiple																																											3	FALSE
spcln3_cln000414|cln001277|cln001875_cc799	846	2	2	Multiple																																											3	FALSE
spcln3_cln000559_cc813	846	2	1	Hdac3																																											3	FALSE
spcln3_cln000559_cc814	846	2	1	Hdac3																																											3	FALSE
spcln3_cln000574_cc816	846	2	2	Phf10																																											3	FALSE
spcln3_cln000595|cln000596_cc820	846	2	2	Multiple																																											3	FALSE
spcln3_cln000595|cln000596_cc821	846	2	1	Multiple																																											3	FALSE
spcln3_cln000610|cln001123|cln001281_cc824	846	2	1	Mbd2																																											3	FALSE
spcln3_cln000651_cc828	846	2	2	Mbd3																																											3	FALSE
spcln3_cln000655_cc831	846	2	2	Irf8																																											3	FALSE
spcln3_cln000655_cc832	846	2	1	Irf8																																											3	FALSE
spcln3_cln000660_cc836	846	2	1	Mbd2																																											3	FALSE
spcln3_cln000660_cc844	846	2	1	Mbd2																																											3	FALSE
spcln3_cln000670_cc846	846	2	1	NTC																																											3	FALSE
spcln3_cln000670_cc848	846	2	1	NTC																																											3	FALSE
spcln3_cln000670_cc849	846	2	2	NTC																																											3	FALSE
spcln3_cln000670_cc850	846	2	2	NTC																																											3	FALSE
spcln3_cln000670_cc851	846	2	2	NTC																																											3	FALSE
spcln3_cln000670_cc852	846	2	1	NTC																																											3	FALSE
spcln3_cln000725|cln002206_cc857	846	2	2	Multiple																																											3	FALSE
spcln3_cln000725|cln002206_cc858	846	2	2	Multiple																																											3	FALSE
spcln3_cln000757_cc864	846	2	2	Multiple																																											3	FALSE
spcln3_cln000757_cc867	846	2	2	Multiple																																											3	FALSE
spcln3_cln000757_cc868	846	2	2	Multiple																																											3	FALSE
spcln3_cln000757_cc869	846	2	2	Multiple																																											3	FALSE
spcln3_cln000757_cc870	846	2	2	Multiple																																											3	FALSE
spcln3_cln000786|cln000787_cc871	846	2	2	Multiple																																											3	FALSE
spcln3_cln000867_cc877	846	2	2	Cited2																																											3	FALSE
spcln3_cln000867_cc878	846	2	2	Cited2																																											3	FALSE
spcln3_cln000867|cln001202|cln001289|cln001661|cln001669_cc880	846	2	1	Mbd2																																											3	FALSE
spcln3_cln000876|cln000896_cc886	846	2	1	Multiple																																											3	FALSE
spcln3_cln000876|cln000896_cc891	846	2	2	Mbd2																																											3	FALSE
spcln3_cln000876|cln000896_cc892	846	2	1	Mbd2																																											3	FALSE
spcln3_cln000972|cln001003|cln001006_cc893	846	2	2	Multiple																																											3	TRUE
spcln3_cln000972|cln001003|cln001006|cln001273_cc894	846	2	2	Multiple																																											3	FALSE
spcln3_cln001005|cln001038_cc895	846	2	2	Kmt2d																																											3	FALSE
spcln3_cln001005|cln001038_cc896	846	2	2	Kmt2d																																											3	FALSE
spcln3_cln001005|cln001038_cc897	846	2	2	Runx1																																											3	FALSE
spcln3_cln001018|cln001087_cc909	846	2	2	Gltscr1																																											3	FALSE
spcln3_cln001018|cln001087|cln002638_cc913	846	2	2	Multiple																																											3	FALSE
spcln3_cln001018|cln001087|cln004357_cc914	846	2	1	Mbd2																																											3	FALSE
spcln3_cln001038_cc915	846	2	1	Runx1																																											3	FALSE
spcln3_cln001066_cc920	846	2	2	Cebpb																																											3	FALSE
spcln3_cln001066_cc921	846	2	1	Cebpb																																											3	FALSE
spcln3_cln001066_cc922	846	2	2	Cebpb																																											3	FALSE
spcln3_cln001066_cc924	846	2	1	Cebpb																																											3	FALSE
spcln3_cln001066_cc925	846	2	2	Cebpb																																											3	FALSE
spcln3_cln001078|cln001167_cc928	846	2	2	Multiple																																											3	FALSE
spcln3_cln001078|cln001167_cc930	846	2	2	Multiple																																											3	FALSE
spcln3_cln001078|cln001167_cc932	846	2	2	Multiple																																											3	FALSE
spcln3_cln001146_cc938	846	2	1	Cebpe																																											3	FALSE
spcln3_cln001146_cc940	846	2	1	Multiple																																											3	FALSE
spcln3_cln001202|cln001289_cc942	846	2	2	Hdac1																																											3	FALSE
spcln3_cln001202|cln001289_cc947	846	2	2	Multiple																																											3	FALSE
spcln3_cln001202|cln001289_cc948	846	2	1	Multiple																																											3	FALSE
spcln3_cln001211|cln002530|cln007269_cc949	846	2	2	Multiple																																											3	FALSE
spcln3_cln001211|cln002530|cln007269_cc950	846	2	2	Multiple																																											3	FALSE
spcln3_cln001212_cc951	846	2	2	Mbd3																																											3	FALSE
spcln3_cln001289_cc953	846	2	2	Multiple																																											3	FALSE
spcln3_cln001289_cc954	846	2	1	Multiple																																											3	FALSE
spcln3_cln001289_cc955	846	2	2	Multiple																																											3	FALSE
spcln3_cln001289_cc956	846	2	1	Multiple																																											3	FALSE
spcln3_cln001312|cln003504_cc968	846	2	2	Cebpa																																											3	FALSE
spcln3_cln001312|cln003504_cc969	846	2	2	Cebpa																																											3	FALSE
spcln3_cln001337_cc970	846	2	2	Brd9																																											3	FALSE
spcln3_cln001337_cc971	846	2	2	Brd9																																											3	FALSE
spcln3_cln001359_cc972	846	2	2	Rcor1																																											3	FALSE
spcln3_cln001406_cc973	846	2	1	NTC																																											3	FALSE
spcln3_cln001406_cc974	846	2	1	NTC																																											3	FALSE
spcln3_cln001432_cc980	846	2	2	Klf1																																											3	FALSE
spcln3_cln001432_cc981	846	2	1	Klf1																																											3	FALSE
spcln3_cln001494|cln008325_cc984	846	2	2	Mbd3																																											3	FALSE
spcln3_cln001494|cln008325_cc985	846	2	1	Multiple																																											3	FALSE
spcln3_cln001494|cln008325_cc986	846	2	2	Multiple																																											3	FALSE
spcln3_cln001720_cc990	846	2	2	Multiple																																											3	FALSE
spcln3_cln001726|cln001732_cc991	846	2	1	Cited4																																											3	FALSE
spcln3_cln001789|cln002390_cc995	846	2	2	Multiple																																											3	FALSE
spcln3_cln002140_cc996	846	2	1	Gltscr1																																											3	FALSE
spcln3_cln002175|cln002741|cln004230_cc1000	846	2	2	Multiple																																											3	FALSE
spcln3_cln002175|cln002741|cln004230_cc1003	846	2	2	Multiple																																											3	FALSE
spcln3_cln002175|cln002741|cln004230_cc1004	846	2	2	Multiple																																											3	FALSE
spcln3_cln002175|cln002741|cln004230_cc1005	846	2	2	Multiple																																											3	FALSE
spcln3_cln002175|cln004230_cc1008	846	2	1	Multiple																																											3	FALSE
spcln3_cln002202_cc1009	846	2	1	NTC																																											3	FALSE
spcln3_cln002205_cc1011	846	2	2	Multiple																																											3	FALSE
spcln3_cln002376_cc1013	846	2	1	NTC																																											3	FALSE
spcln3_cln002381|cln004301_cc1014	846	2	1	Mbd2																																											3	FALSE
spcln3_cln002381|cln004301_cc1015	846	2	2	Mbd2																																											3	FALSE
spcln3_cln002398_cc1019	846	2	1	Cited2																																											3	FALSE
spcln3_cln002405_cc1023	846	2	2	Cited4																																											3	FALSE
spcln3_cln002405_cc1024	846	2	1	Multiple																																											3	FALSE
spcln3_cln002418_cc1025	846	2	2	Multiple																																											3	FALSE
spcln3_cln002481_cc1027	846	2	1	Cebpa																																											3	FALSE
spcln3_cln002504|cln002569_cc1028	846	2	2	Multiple																																											3	FALSE
spcln3_cln002529_cc1030	846	2	2	Multiple																																											3	FALSE
spcln3_cln002529_cc1031	846	2	1	Multiple																																											3	FALSE
spcln3_cln002529_cc1032	846	2	1	Multiple																																											3	FALSE
spcln3_cln002563_cc1033	846	2	2	Pax5																																											3	FALSE
spcln3_cln002563_cc1035	846	2	2	Pax5																																											3	FALSE
spcln3_cln002563_cc1037	846	2	2	Pax5																																											3	FALSE
spcln3_cln002638_cc1049	846	2	2	Hdac1																																											3	FALSE
spcln3_cln002638_cc1050	846	2	2	Hdac1																																											3	FALSE
spcln3_cln002638_cc1051	846	2	2	Hdac1																																											3	FALSE
spcln3_cln002638|cln005069|cln007126|cln008372_cc1053	846	2	1	Multiple																																											3	FALSE
spcln3_cln002647|cln002648_cc1056	846	2	2	Multiple																																											3	FALSE
spcln3_cln002647|cln002648_cc1057	846	2	1	Multiple																																											3	FALSE
spcln3_cln002647|cln002648_cc1062	846	2	1	Meis1																																											3	FALSE
spcln3_cln002903_cc1064	846	2	1	Atf4																																											3	FALSE
spcln3_cln002903_cc1065	846	2	2	Atf4																																											3	FALSE
spcln3_cln002903_cc1066	846	2	1	Atf4																																											3	FALSE
spcln3_cln003370_cc1072	846	2	1	Multiple																																											3	FALSE
spcln3_cln003377_cc1079	846	2	2	NTC																																											3	FALSE
spcln3_cln003377_cc1082	846	2	2	NTC																																											3	FALSE
spcln3_cln003378_cc1086	846	2	1	Cebpa																																											3	FALSE
spcln3_cln003378_cc1088	846	2	2	Cebpa																																											3	FALSE
spcln3_cln003378_cc1089	846	2	2	Cebpa																																											3	FALSE
spcln3_cln003378_cc1091	846	2	2	Cebpa																																											3	FALSE
spcln3_cln003378_cc1092	846	2	2	Cebpa																																											3	FALSE
spcln3_cln003378_cc1094	846	2	2	Cebpa																																											3	FALSE
spcln3_cln003378_cc1095	846	2	1	Multiple																																											3	FALSE
spcln3_cln003547_cc1097	846	2	1	Hdac1																																											3	FALSE
spcln3_cln003573_cc1099	846	2	2	Runx1																																											3	FALSE
spcln3_cln003870_cc1109	846	2	2	Gata1																																											3	FALSE
spcln3_cln003921_cc1111	846	2	1	Cebpb																																											3	FALSE
spcln3_cln003921_cc1113	846	2	1	Cebpb																																											3	FALSE
spcln3_cln003992|cln007325|cln008296|cln008297_cc1117	846	2	1	Multiple																																											3	FALSE
spcln3_cln004140|cln004405|cln007124_cc1118	846	2	1	Multiple																																											3	FALSE
spcln3_cln004140|cln004405|cln007124_cc1119	846	2	2	Multiple																																											3	FALSE
spcln3_cln004276_cc1125	846	2	2	Gltscr1																																											3	FALSE
spcln3_cln004342_cc1126	846	2	1	Pax5																																											3	FALSE
spcln3_cln004357_cc1128	846	2	2	Mbd2																																											3	FALSE
spcln3_cln004357_cc1129	846	2	1	Mbd2																																											3	FALSE
spcln3_cln004357_cc1131	846	2	2	Mbd2																																											3	FALSE
spcln3_cln004358_cc1132	846	2	2	Elk4																																											3	FALSE
spcln3_cln004373_cc1134	846	2	2	Cited4																																											3	FALSE
spcln3_cln005069|cln007126|cln008372_cc1135	846	2	1	Multiple																																											3	FALSE
spcln3_cln005522|cln005592_cc1136	846	2	2	Multiple																																											3	FALSE
spcln3_cln005885|cln008358|cln008359_cc1137	846	2	2	Multiple																																											3	FALSE
spcln3_cln005885|cln008358|cln008359_cc1138	846	2	2	Multiple																																											3	FALSE
spcln3_cln006693_cc1139	846	2	1	Multiple																																											3	FALSE
spcln3_cln006693_cc1140	846	2	1	Gata1																																											3	FALSE
spcln3_cln006693_cc1143	846	2	2	Gata1																																											3	FALSE
spcln3_cln006693_cc1145	846	2	2	Gata1																																											3	FALSE
spcln3_cln007123_cc1152	846	2	1	Atf7ip																																											3	FALSE
spcln3_cln007125_cc1154	846	2	1	Hhex																																											3	FALSE
spcln3_cln007197|cln007270_cc1156	846	2	1	Multiple																																											3	FALSE
spcln3_cln007197|cln007270_cc1158	846	2	2	Multiple																																											3	FALSE
spcln3_cln007197|cln007270_cc1161	846	2	2	Multiple																																											3	FALSE
spcln3_cln007197|cln007270|cln007464_cc1163	846	2	2	Multiple																																											3	FALSE
spcln3_cln007197|cln007270|cln007464_cc1164	846	2	1	Multiple																																											3	TRUE
spcln3_cln007197|cln007270|cln007464_cc1165	846	2	1	Multiple																																											3	FALSE
spcln3_cln007198_cc1169	846	2	2	NTC																																											3	FALSE
spcln3_cln007198_cc1170	846	2	2	NTC																																											3	FALSE
spcln3_cln007228_cc1171	846	2	2	Cebpa																																											3	FALSE
spcln3_cln007229_cc1172	846	2	1	Mbd3																																											3	FALSE
spcln3_cln007291_cc1173	846	2	2	Multiple																																											3	FALSE
spcln3_cln007335_cc1174	846	2	2	Multiple																																											3	FALSE
spcln3_cln007335_cc1175	846	2	2	Multiple																																											3	FALSE
spcln3_cln007335_cc1178	846	2	1	Tal1																																											3	FALSE
spcln3_cln007335_cc1179	846	2	1	Tal1																																											3	TRUE
spcln3_cln007336|cln007368_cc1182	846	2	2	Multiple																																											3	FALSE
spcln3_cln007357|cln007386|cln007411_cc1183	846	2	1	Multiple																																											3	FALSE
spcln3_cln007508_cc1184	846	2	2	Pax5																																											3	FALSE
spcln3_cln007580|cln007582_cc1185	846	2	1	Multiple																																											3	FALSE
spcln3_cln008027|cln008152_cc1186	846	2	2	Multiple																																											3	FALSE
spcln3_cln008053_cc1187	846	2	2	Klf1																																											3	FALSE
spcln3_cln008111_cc1188	846	2	2	Multiple																																											3	FALSE
spcln3_cln008200|cln008225_cc1190	846	2	1	Multiple																																											3	FALSE
spcln3_cln008245_cc1192	846	2	2	NTC																																											3	FALSE
spcln3_cln008256|cln008258_cc1194	846	2	2	Hdac1																																											3	FALSE
spcln3_cln008277|cln008281_cc1198	846	2	2	Multiple																																											3	FALSE
spcln3_cln008285|cln008298_cc1199	846	2	2	Hdac1																																											3	FALSE
spcln3_cln008288_cc1200	846	2	2	Phf10																																											3	FALSE
spcln3_cln008288_cc1201	846	2	2	Phf10																																											3	FALSE
spcln3_cln008289_cc1202	846	2	2	Rbbp4																																											3	FALSE
spcln3_cln008289_cc1203	846	2	2	Rbbp4																																											3	FALSE
spcln3_cln008292_cc1206	846	2	2	Cebpa																																											3	FALSE
spcln3_cln008292_cc1208	846	2	2	Cebpa																																											3	FALSE
spcln3_cln008317_cc1212	846	2	1	Multiple																																											3	FALSE
spcln3_cln008318|cln008332|cln008339_cc1213	846	2	1	Multiple																																											3	FALSE
spcln3_cln008357_cc1220	846	2	1	Cebpa																																											3	FALSE
spcln3_cln008357_cc1223	846	2	2	Cebpa																																											3	FALSE
spcln3_cln008360_cc1225	846	2	1	Multiple																																											3	FALSE
spcln3_cln008361|cln008363_cc1230	846	2	2	Multiple																																											3	FALSE
spcln3_cln008851_cc1243	846	2	1	Hhex																																											3	FALSE
spcln4_cln000023_cc1246	846	2	2	Cebpe																																											4	FALSE
spcln4_cln000030|cln000031_cc1250	846	2	2	Multiple																																											4	FALSE
spcln4_cln000030|cln000031_cc1251	846	2	2	Multiple																																											4	FALSE
spcln4_cln000030|cln000031_cc1252	846	2	2	Multiple																																											4	FALSE
spcln4_cln000165_cc1258	846	2	1	Erg																																											4	FALSE
spcln4_cln000166|cln000243_cc1259	846	2	1	Multiple																																											4	FALSE
spcln4_cln000168|cln000196|cln000272|cln000275_cc1260	846	2	2	Multiple																																											4	FALSE
spcln4_cln000168|cln000196|cln000272|cln000275_cc1261	846	2	2	Multiple																																											4	FALSE
spcln4_cln000202_cc1267	846	2	2	Mbd3																																											4	FALSE
spcln4_cln000205|cln000206|cln000207_cc1270	846	2	2	Multiple																																											4	TRUE
spcln4_cln000321_cc1277	846	2	2	Pax5																																											4	FALSE
spcln4_cln000321_cc1278	846	2	2	Pax5																																											4	FALSE
spcln4_cln000328|cln000329_cc1279	846	2	1	NTC																																											4	FALSE
spcln4_cln000363|cln002478|cln002560_cc1281	846	2	2	Multiple																																											4	FALSE
spcln4_cln000404_cc1282	846	2	1	Cebpa																																											4	FALSE
spcln4_cln000414|cln001277_cc1285	846	2	1	Multiple																																											4	FALSE
spcln4_cln000443_cc1288	846	2	2	Multiple																																											4	FALSE
spcln4_cln000559_cc1289	846	2	2	Hdac3																																											4	FALSE
spcln4_cln000595|cln000596_cc1291	846	2	2	Multiple																																											4	FALSE
spcln4_cln000595|cln000596_cc1292	846	2	2	Multiple																																											4	FALSE
spcln4_cln000655_cc1298	846	2	2	Irf8																																											4	FALSE
spcln4_cln000655_cc1299	846	2	2	Irf8																																											4	FALSE
spcln4_cln000655_cc1300	846	2	2	Irf8																																											4	FALSE
spcln4_cln000660_cc1302	846	2	2	Mbd2																																											4	FALSE
spcln4_cln000670_cc1310	846	2	2	NTC																																											4	FALSE
spcln4_cln000670_cc1313	846	2	1	NTC																																											4	FALSE
spcln4_cln000670_cc1314	846	2	2	NTC																																											4	FALSE
spcln4_cln000670_cc1315	846	2	1	NTC																																											4	FALSE
spcln4_cln000717|cln000723_cc1319	846	2	1	Multiple																																											4	FALSE
spcln4_cln000725|cln002206_cc1320	846	2	2	Multiple																																											4	FALSE
spcln4_cln000725|cln002206_cc1321	846	2	2	Multiple																																											4	FALSE
spcln4_cln000757_cc1327	846	2	1	Multiple																																											4	FALSE
spcln4_cln000757_cc1328	846	2	2	Multiple																																											4	FALSE
spcln4_cln000757_cc1331	846	2	2	Multiple																																											4	FALSE
spcln4_cln000876|cln000896_cc1335	846	2	2	Multiple																																											4	FALSE
spcln4_cln000876|cln000896_cc1336	846	2	1	Multiple																																											4	FALSE
spcln4_cln001005|cln001038_cc1337	846	2	2	Kmt2d																																											4	FALSE
spcln4_cln001076|cln002640_cc1339	846	2	2	Rcor1																																											4	FALSE
spcln4_cln001078|cln001167_cc1340	846	2	2	Multiple																																											4	FALSE
spcln4_cln001078|cln001167_cc1343	846	2	2	Multiple																																											4	FALSE
spcln4_cln001078|cln001167_cc1344	846	2	2	Multiple																																											4	FALSE
spcln4_cln001078|cln001167_cc1345	846	2	1	Multiple																																											4	FALSE
spcln4_cln001212_cc1348	846	2	2	Mbd3																																											4	FALSE
spcln4_cln001213|cln001248|cln001278_cc1351	846	2	2	Multiple																																											4	FALSE
spcln4_cln001213|cln001248|cln001278_cc1352	846	2	2	Multiple																																											4	FALSE
spcln4_cln001406_cc1357	846	2	2	NTC																																											4	FALSE
spcln4_cln001661|cln001669_cc1358	846	2	2	Mbd2																																											4	FALSE
spcln4_cln001780_cc1360	846	2	1	Setdb1																																											4	FALSE
spcln4_cln001789|cln002390_cc1361	846	2	2	Multiple																																											4	FALSE
spcln4_cln002145_cc1364	846	2	1	Mbd3																																											4	FALSE
spcln4_cln002145_cc1365	846	2	2	Mbd3																																											4	FALSE
spcln4_cln002381|cln004301_cc1366	846	2	2	Mbd2																																											4	FALSE
spcln4_cln002381|cln004301_cc1368	846	2	2	Mbd2																																											4	FALSE
spcln4_cln002405_cc1370	846	2	2	Cited4																																											4	FALSE
spcln4_cln002526|cln002649_cc1371	846	2	2	Rcor1																																											4	FALSE
spcln4_cln002563_cc1372	846	2	2	Pax5																																											4	FALSE
spcln4_cln002563_cc1377	846	2	2	Pax5																																											4	FALSE
spcln4_cln002563_cc1380	846	2	1	Pax5																																											4	FALSE
spcln4_cln002605_cc1383	846	2	1	Mbd3																																											4	FALSE
spcln4_cln002638_cc1384	846	2	2	Hdac1																																											4	FALSE
spcln4_cln002647|cln002648_cc1387	846	2	1	Multiple																																											4	FALSE
spcln4_cln002647|cln002648_cc1389	846	2	2	Meis1																																											4	FALSE
spcln4_cln002903_cc1393	846	2	2	Atf4																																											4	FALSE
spcln4_cln003378_cc1395	846	2	1	Multiple																																											4	FALSE
spcln4_cln003612_cc1403	846	2	2	NTC																																											4	FALSE
spcln4_cln003728|cln003748|cln003887|cln003898|cln007304_cc1404	846	2	1	Multiple																																											4	FALSE
spcln4_cln003728|cln003748|cln003887|cln007304_cc1405	846	2	1	Multiple																																											4	FALSE
spcln4_cln003728|cln003748|cln003887|cln007304_cc1406	846	2	2	Multiple																																											4	FALSE
spcln4_cln003992|cln007325|cln008296|cln008297_cc1407	846	2	2	Multiple																																											4	FALSE
spcln4_cln004357_cc1411	846	2	2	Mbd2																																											4	FALSE
spcln4_cln004359|cln004386|cln004414|cln004415_cc1414	846	2	2	Multiple																																											4	FALSE
spcln4_cln005069|cln007126|cln008372_cc1417	846	2	2	Multiple																																											4	FALSE
spcln4_cln007123_cc1423	846	2	2	Atf7ip																																											4	FALSE
spcln4_cln007123_cc1424	846	2	1	Atf7ip																																											4	FALSE
spcln4_cln007123_cc1425	846	2	2	Atf7ip																																											4	FALSE
spcln4_cln007197|cln007270|cln007464_cc1427	846	2	1	Multiple																																											4	FALSE
spcln4_cln007198_cc1431	846	2	2	NTC																																											4	FALSE
spcln4_cln007198_cc1433	846	2	1	NTC																																											4	FALSE
spcln4_cln007228_cc1439	846	2	1	Cebpa																																											4	FALSE
spcln4_cln007509|cln007538_cc1440	846	2	2	Multiple																																											4	FALSE
spcln4_cln008022|cln008070_cc1442	846	2	1	Multiple																																											4	FALSE
spcln4_cln008278|cln008329_cc1444	846	2	2	Multiple																																											4	FALSE
spcln4_cln008278|cln008329_cc1445	846	2	1	Multiple																																											4	FALSE
spcln4_cln008357_cc1446	846	2	1	Multiple																																											4	FALSE
spcln4_cln008357_cc1452	846	2	1	Cebpa																																											4	FALSE
spcln4_cln008357_cc1454	846	2	2	Cebpa																																											4	FALSE
spcln4_cln008361|cln008363_cc1456	846	2	2	Multiple																																											4	FALSE
spcln4_cln008361|cln008363_cc1457	846	2	1	Multiple																																											4	FALSE
spcln4_cln008851_cc1458	846	2	1	Hhex																																											4	FALSE
spcln4_cln008851_cc1463	846	2	2	Hhex																																											4	FALSE
spcln4_cln008851_cc1465	846	2	2	Hhex																																											4	FALSE
spcln4_cln008851_cc1466	846	2	2	Hhex																																											4	FALSE
spcln5_cln000030_cc1467	846	2	1	Multiple																																											5	FALSE
spcln5_cln000061|cln000123_cc1472	846	2	2	Multiple																																											5	FALSE
spcln5_cln000108_cc1474	846	2	2	Rcor1																																											5	FALSE
spcln5_cln000108_cc1475	846	2	2	Rcor1																																											5	FALSE
spcln5_cln000108_cc1476	846	2	2	Rcor1																																											5	FALSE
spcln5_cln000108_cc1477	846	2	1	Rcor1																																											5	FALSE
spcln5_cln000166|cln000243_cc1478	846	2	1	Multiple																																											5	FALSE
spcln5_cln000176|cln000238_cc1480	846	2	1	Multiple																																											5	FALSE
spcln5_cln000176|cln000238_cc1482	846	2	1	Multiple																																											5	FALSE
spcln5_cln000202_cc1488	846	2	2	Mbd3																																											5	FALSE
spcln5_cln000202|cln003993_cc1489	846	2	1	Mbd3																																											5	FALSE
spcln5_cln000215_cc1490	846	2	2	Chd4																																											5	FALSE
spcln5_cln000215_cc1491	846	2	1	Chd4																																											5	FALSE
spcln5_cln000233_cc1495	846	2	2	Phf10																																											5	FALSE
spcln5_cln000258|cln004347_cc1496	846	2	1	Mbd2																																											5	FALSE
spcln5_cln000284|cln000349_cc1498	846	2	1	Multiple																																											5	FALSE
spcln5_cln000284|cln000349_cc1499	846	2	2	Multiple																																											5	FALSE
spcln5_cln000284|cln000349_cc1500	846	2	2	Erg																																											5	FALSE
spcln5_cln000284|cln000349_cc1501	846	2	2	Erg																																											5	FALSE
spcln5_cln000332_cc1504	846	2	1	Cited4																																											5	FALSE
spcln5_cln000573|cln001783_cc1508	846	2	1	Multiple																																											5	FALSE
spcln5_cln000574_cc1511	846	2	1	Phf10																																											5	FALSE
spcln5_cln000574_cc1512	846	2	2	Phf10																																											5	FALSE
spcln5_cln000597|cln000658_cc1513	846	2	2	Mbd3																																											5	FALSE
spcln5_cln000597|cln000658_cc1514	846	2	1	Mbd3																																											5	FALSE
spcln5_cln000660_cc1517	846	2	1	Mbd2																																											5	FALSE
spcln5_cln000660_cc1518	846	2	2	Mbd2																																											5	FALSE
spcln5_cln000745_cc1524	846	2	1	Elk4																																											5	FALSE
spcln5_cln000876|cln000896_cc1525	846	2	2	Mbd2																																											5	FALSE
spcln5_cln000979|cln000980_cc1526	846	2	2	Multiple																																											5	TRUE
spcln5_cln001113_cc1528	846	2	1	Irf8																																											5	FALSE
spcln5_cln001210_cc1529	846	2	2	Gltscr1																																											5	FALSE
spcln5_cln001440_cc1534	846	2	2	Elk4																																											5	FALSE
spcln5_cln001767|cln001812|cln002642_cc1535	846	2	2	Multiple																																											5	FALSE
spcln5_cln001767|cln001812|cln002642_cc1538	846	2	1	Multiple																																											5	FALSE
spcln5_cln001789|cln002390_cc1540	846	2	2	Multiple																																											5	FALSE
spcln5_cln001789|cln002390_cc1541	846	2	2	Rcor1																																											5	FALSE
spcln5_cln001922|cln003940_cc1544	846	2	1	Multiple																																											5	FALSE
spcln5_cln002163|cln002311_cc1546	846	2	2	Cited4																																											5	FALSE
spcln5_cln002348|cln002622_cc1547	846	2	2	Hdac3																																											5	FALSE
spcln5_cln002381|cln004301_cc1550	846	2	1	Multiple																																											5	FALSE
spcln5_cln002381|cln004301_cc1554	846	2	1	Mbd2																																											5	FALSE
spcln5_cln002390_cc1556	846	2	2	Rcor1																																											5	FALSE
spcln5_cln002390_cc1557	846	2	2	Rcor1																																											5	FALSE
spcln5_cln002479|cln002522_cc1558	846	2	2	Multiple																																											5	FALSE
spcln5_cln002563_cc1566	846	2	2	Pax5																																											5	FALSE
spcln5_cln002638_cc1569	846	2	1	Hdac1																																											5	FALSE
spcln5_cln002638_cc1571	846	2	1	Hdac1																																											5	FALSE
spcln5_cln002638_cc1572	846	2	1	Hdac1																																											5	FALSE
spcln5_cln002638_cc1573	846	2	2	Hdac1																																											5	FALSE
spcln5_cln002684|cln004192|cln004402_cc1578	846	2	2	Multiple																																											5	FALSE
spcln5_cln002684|cln004192|cln004402_cc1579	846	2	2	Multiple																																											5	FALSE
spcln5_cln002684|cln004192|cln004402_cc1580	846	2	1	Multiple																																											5	FALSE
spcln5_cln003993_cc1584	846	2	2	Tal1																																											5	FALSE
spcln5_cln005069|cln007126|cln008372_cc1588	846	2	2	Multiple																																											5	FALSE
spcln5_cln007229_cc1590	846	2	2	Mbd3																																											5	FALSE
spcln5_cln007265_cc1591	846	2	2	Multiple																																											5	FALSE
spcln618_bcsplit0_cc8	846	2	1	Cebpa																																											1	FALSE
spcln618_bcsplit11	846	2	1	Cebpa																																											1	FALSE
spcln618_bcsplit16_cc2	846	2	2	Cebpa																																											1	FALSE
spcln618_bcsplit1_cc3	846	2	2	Cebpa																																											1	FALSE
spcln618_bcsplit6_cc0	846	2	1	Cebpa																																											1	FALSE
spcln618_bcsplit6_cc2	846	2	2	Cebpa																																											1	FALSE
spcln619_bcsplit1	846	2	2	Cebpa																																											2	FALSE
spcln620_bcsplit5	846	2	1	Cebpa																																											3	FALSE
spcln622_bcsplit1_cc2	846	2	1	Cebpa																																											3	FALSE
spcln622_cc1	846	2	2	Cebpa																																											3	FALSE
spcln623_bcsplit1_cc0	846	2	2	Cebpa																																											4	FALSE
spcln623_bcsplit1_cc1	846	2	2	Cebpa																																											4	FALSE
spcln623_bcsplit3	846	2	2	Cebpa																																											4	FALSE
spcln623_bcsplit4_cc0	846	2	2	Cebpa																																											4	FALSE
spcln632_bcsplit1_cc1	846	2	1	Gltscr1																																											3	FALSE
spcln633_bcsplit1	846	2	2	Gltscr1																																											3	FALSE
spcln644_bcsplit0_cc0	846	2	2	Meis1																																											3	FALSE
spcln648_bcsplit0_cc3	846	2	2	NTC																																											3	FALSE
spcln663_bcsplit3	846	2	2	Rcor1																																											1	FALSE
spcln667	846	2	1	Rcor1																																											1	FALSE
spcln4_cln000573|cln001783_cc1114	847	815	105	Multiple																																											4	FALSE
spcln5_cln000514|cln010392_cc1740	847	685	163	Multiple																																											5	FALSE
spcln4_cln002638_cc1398	847	579	78	Hdac1	55.22	51.64	50,47|50,52|51,47|51,48|51,49|51,50|51,51|51,52|51,53|51,54|51,55|52,49|52,53|53,46|53,47|53,48|53,49|53,53|53,54|54,48|54,53|55,47|55,48|55,49|55,50|55,53|55,54|55,55|56,48|56,50|56,55|57,48|57,49|57,50|57,51|57,55|57,56|57,57|57,58|57,59|58,51|58,56|58,57|59,47|59,48|59,49|59,50|59,51|59,52|59,53|59,54|59,55|59,56|60,52|60,53	Hdac1-Br-1	EP	96.9	DBL	1.4	1.1581	0.418028	0.753885	1.1581	1.76018	1.18122	1.76018	EP	0.418028	0.416989	0.000807786	0.371144	0.661318	0.405577	0.412638	0.419615	0.42127	0.414603	0.416948	5.63801e-05	0.371144	0.425421	0.405481	0.412572	0.419539	0.421155	561	55	23	3	0.0895292	1.09366	0.0311665	2.76343	4	FALSE	0
spcln5_cln000434_cc1698	847	542	108	Hoxa7	35.06	44.81	27,43|27,46|27,47|27,48|28,43|28,44|28,46|28,47|29,42|29,44|29,45|29,46|29,47|29,48|29,49|29,50|30,40|30,42|30,44|30,45|30,46|30,47|30,48|31,40|31,41|31,42|31,43|31,44|31,46|31,48|32,39|32,42|32,44|32,45|32,46|33,41|33,42|33,43|33,44|33,45|34,40|34,42|34,44|34,45|34,48|35,40|35,41|35,42|35,43|35,44|35,45|35,46|35,47|35,49|36,40|36,41|36,42|36,45|36,47|37,42|37,45|37,46|37,47|37,48|37,50|38,42|38,…	Hoxa7-TF1.Br	EP	98	DBL	1.7	1.20851	0.413484	0.750538	1.20851	1.81177	1.22258	1.81177	EP	0.413484	0.417081	0.000164035	0.355812	0.593146	0.396874	0.409478	0.420247	0.421942	0.413146	0.417075	0.000103327	0.355812	0.424253	0.396872	0.40935	0.42024	0.421941	531	88	20	2	0.0136761	1.01377	0.00375233	2.7348	5	FALSE	0
spcln312_cc0	847	470	96	Phf10	54.7	54.93	50,53|50,54|51,48|51,49|51,50|51,51|51,52|51,53|51,54|51,55|51,56|51,57|51,58|51,59|52,50|52,56|52,58|52,59|52,60|53,49|53,50|53,56|53,57|53,58|53,59|53,60|53,61|54,50|54,51|54,56|54,58|54,60|55,49|55,51|55,52|55,53|55,54|55,55|55,56|55,57|55,58|55,59|55,60|55,61|56,52|56,53|56,55|56,57|56,59|56,60|56,61|57,49|57,50|57,51|57,52|57,53|57,54|57,55|57,57|57,58|57,59|57,60|57,62|58,51|58,52|58,54|58,…	Phf10-As	EP	96	DBL	1.1	1.16705	0.412132	0.745172	1.16705	1.85042	1.20028	1.85042	EP	0.412132	0.414451	0.00027621	0.337784	0.610646	0.395021	0.40708	0.418342	0.420725	0.411145	0.414437	8.87166e-05	0.386788	0.42377	0.395022	0.407015	0.41833	0.420637	451	77	19	6	0.159573	1.17301	0.0510055	2.67302	4	FALSE	0
spcln270_cc0	847	307	64	Irf8	13.08	50.77	9,47|9,48|9,50|10,46|10,47|10,48|10,49|10,50|10,51|10,52|10,53|11,46|11,52|11,54|12,46|12,52|12,56|13,46|13,47|13,48|13,52|13,53|13,54|13,55|13,56|14,48|14,49|14,50|14,53|14,55|14,56|15,50|15,51|15,52|15,53|15,54|15,55|16,49|16,50|16,51|16,54|16,55|16,56|17,49|17,53|17,54|18,49|18,50|18,52	Irf8-TF1.Br	EP	99	DBL	1	1.30173	0.414982	0.753791	1.30173	1.99646	1.30514	1.99646	EP	0.414982	0.417771	7.59281e-05	0.380179	0.425573	0.403112	0.414293	0.420284	0.421556	0.414982	0.417771	7.59281e-05	0.380179	0.425573	0.403112	0.414293	0.420284	0.421556	304	49	15	1	0	1	0	2.48855	1	FALSE	0
spcln329	847	273	61	Tal1	18.98	37.82	13,39|14,37|14,38|14,39|14,40|15,37|16,33|16,34|16,35|16,36|16,37|16,38|17,34|17,35|17,36|17,37|17,38|18,33|18,34|18,39|18,40|19,33|19,36|19,37|19,38|19,39|19,40|19,41|19,42|19,43|19,44|20,33|20,34|20,36|20,37|20,38|20,40|20,43|21,32|21,34|21,35|21,36|21,38|21,39|21,40|21,43|21,44|22,32|22,33|22,35|22,36|22,37|22,38|22,40|22,41|22,42|22,43	Tal1-TF1.Br-1	EP	98.9	DBL	1.1	1.26844	0.414728	0.75333	1.26844	1.92935	1.2739	1.92935	EP	0.414728	0.416715	5.34613e-05	0.385109	0.423377	0.405537	0.412854	0.419622	0.421142	0.414728	0.416715	5.34613e-05	0.385109	0.423377	0.405537	0.412854	0.419622	0.421142	270	57	4	1	0	1	0	2.43775	1	FALSE	0
spcln3_cln000403|cln000634_cc675	847	273	80	Multiple																																											3	FALSE
spcln4_cln001218_cc1272	847	227	79	Pax5	61.33	51.19	54,49|54,50|55,49|55,50|55,51|56,48|56,49|57,47|57,48|57,49|57,50|57,51|57,52|57,53|57,54|57,55|58,47|58,48|58,49|58,50|58,51|58,52|58,56|58,57|58,58|59,47|59,49|59,50|59,52|59,53|59,54|59,57|59,58|60,49|60,50|60,51|60,52|61,47|61,49|61,57|62,48|62,49|62,50|62,51|62,52|62,57|63,50|63,52|63,53|63,54|63,56|64,48|64,49|64,50|64,51|64,53|64,54|64,55|65,47|65,48|65,49|65,50|65,51|65,52|65,53|65,54|66,…	Pax5-TF1.Br	EP	85.9	Neutrophil	11.9	1.05992	0.441802	0.765434	1.05992	1.76215	1.24993	1.76215	EP	0.441802	0.418357	0.00547233	0.377484	0.667823	0.403181	0.413193	0.421726	0.622546	0.414615	0.417561	8.67359e-05	0.377484	0.423863	0.401251	0.412549	0.420772	0.422255	195	79	0	2	0.370144	1.44794	0.21366	2.35793	4	FALSE	0
spcln5_cln000514_cc1735	847	216	83	Multiple																																											5	FALSE
spcln4_cln000633_cc1161	847	208	42	Hhex	63.67	52.71	58,55|59,53|59,54|59,55|60,55|61,55|62,55|62,56|63,48|63,49|63,51|63,52|63,53|63,54|63,55|63,56|64,49|64,50|64,51|64,52|64,53|64,54|64,56|64,57|65,48|65,49|65,51|65,52|65,54|65,55|65,56|65,57|65,58|66,48|66,49|66,50|66,51|66,55|67,48|67,50	Hhex-TF1.Br-1	EP	99	DBL	0.5	1.24609	0.415183	0.752747	1.24609	1.81384	1.25519	1.81384	EP	0.415183	0.417124	0.000258047	0.38545	0.61074	0.401117	0.411341	0.420039	0.421745	0.414234	0.417118	7.18524e-05	0.38545	0.426149	0.401057	0.411252	0.420029	0.421729	206	40	2	2	0.0305812	1.03105	0.00961516	2.32015	4	FALSE	0
spcln5_cln000617|cln001772_cc1805	847	204	72	Multiple																																											5	FALSE
spcln4_cln000030|cln000031_cc930	847	190	45	Multiple																																											4	FALSE
spcln2_cln000030|cln000031_cc293	847	185	52	Multiple																																											2	FALSE
spcln5_cln000639|cln001868_cc1817	847	185	73	Tal1	40.19	60.55	34,66|35,61|35,63|35,64|35,66|36,58|36,59|36,62|36,65|37,57|37,61|37,62|38,53|38,54|38,56|38,57|38,58|38,60|38,64|38,65|38,66|39,55|39,57|39,58|39,59|39,61|39,62|39,63|39,64|39,65|40,57|40,58|40,59|40,60|40,61|40,62|40,63|40,65|40,68|41,55|41,56|41,58|41,59|41,60|41,61|41,63|41,64|41,66|41,68|42,55|42,59|42,61|42,62|42,67|43,55|43,56|43,57|43,58|43,59|43,60|43,61|43,62|43,63|43,67|44,54|44,55|44,…	Tal1-TF1.Br-1	EP	98.4	Macrophage MZ	1.1	1.21698	0.412941	0.750084	1.21698	1.89807	1.22466	1.89807	EP	0.412941	0.416272	7.44387e-05	0.381663	0.422662	0.400289	0.410052	0.418899	0.421076	0.412941	0.416272	7.44387e-05	0.381663	0.422662	0.400289	0.410052	0.418899	0.421076	182	73	0	2	0.0599602	1.06179	0.0215028	2.26951	5	FALSE	0
spcln278_cc0	847	165	40	Mbd3	30.72	28.52	26,30|27,30|27,31|28,29|28,30|28,31|28,32|29,26|29,27|29,28|29,29|29,32|30,26|30,27|30,29|30,30|30,31|30,32|31,27|31,29|31,32|32,26|32,27|32,29|32,32|33,25|33,27|33,28|33,29|34,25|34,26|34,27|35,25|35,26|36,26	Mbd3-As	EP	98.2	Neutrophil	1.2	1.25108	0.422134	0.763193	1.25108	1.71021	1.27075	1.71021	EP	0.422134	0.420464	0.000494025	0.381411	0.643726	0.417252	0.4191	0.421675	0.422612	0.419739	0.42043	1.7409e-05	0.381411	0.424502	0.417244	0.419091	0.421654	0.422589	162	35	5	2	0.0658609	1.06808	0.0240928	2.22011	2	FALSE	0
spcln284	847	152	47	NTC	30.98	42.47	27,42|27,43|27,44|28,42|28,44|28,45|28,46|29,39|29,40|29,41|29,42|29,43|29,44|29,45|29,46|29,47|30,40|30,43|30,45|30,46|30,48|31,40|31,43|31,44|32,40|32,41|32,42|32,43|32,45|33,39|33,41|33,42|33,44|34,39|34,40|34,42|35,40|35,42|36,40|36,41|36,42|37,42	NTC-Ms-1	EP	99.3	DBL	0.7	1.28134	0.414994	0.753813	1.28134	1.76363	1.28582	1.76363	EP	0.414994	0.416523	4.92762e-05	0.386907	0.425159	0.406563	0.411896	0.419732	0.421567	0.414994	0.416523	4.92762e-05	0.386907	0.425159	0.406563	0.411896	0.419732	0.421567	151	42	5	1	0	1	0	2.18469	5	FALSE	0
spcln4_cln001210_cc1263	847	152	57	Gltscr1	55.07	56.07	50,54|51,53|51,54|51,55|51,56|51,58|51,59|52,51|52,52|52,53|52,54|52,55|52,57|52,58|52,59|53,53|53,54|53,58|53,60|54,53|54,54|54,56|54,57|55,52|55,53|55,54|55,55|55,56|55,57|55,58|55,59|56,56|56,59|56,60|57,53|57,54|57,55|57,56|57,59|57,60|58,54|58,55|58,56|58,57|58,59|59,54|59,55|59,57|59,58|59,59|60,56|60,59	Gltscr1-As	EP	96.1	Neutrophil	2	0.870171	0.404281	0.728195	0.870171	1.76021	0.903166	1.76021	EP	0.404281	0.400703	0.00132302	0.364131	0.667285	0.382696	0.389156	0.410836	0.417007	0.399431	0.39972	0.000166978	0.364131	0.422025	0.382636	0.388956	0.410448	0.415794	146	52	5	2	0.098561	1.10358	0.0394577	2.18469	4	FALSE	0
spcln1_cln006207_cc265	847	149	34	Cebpa	9.03	41.32	7,38|7,40|7,41|7,42|7,43|7,44|8,38|8,39|8,40|8,44|9,38|9,39|9,40|9,44|10,38|10,40|10,42|10,43|10,44|10,45|10,46|11,38|11,39|11,40|11,41|11,42|11,44	Cebpa-BR	EP	98.7	DBL	1.3	1.31502	0.416216	0.756032	1.31502	1.84163	1.31492	1.84163	DBL	0.416216	0.417822	4.79743e-05	0.386493	0.423463	0.408835	0.41481	0.420802	0.42243	0.416216	0.417822	4.79743e-05	0.386493	0.423463	0.408835	0.41481	0.420802	0.42243	147	27	7	1	0	1	0	2.17609	1	FALSE	0
spcln283_cc0	847	133	47	Mbd3	39.68	49.7	35,46|35,52|36,46|36,47|36,48|36,49|36,51|36,52|37,48|37,51|38,47|38,48|38,49|38,50|38,51|38,52|38,53|38,54|39,47|39,50|39,51|39,53|40,47|40,48|40,49|40,50|40,51|40,54|41,47|41,48|41,50|41,51|41,52|41,53|42,46|42,48|42,50|42,51|43,46|43,47|43,48|43,49|43,51|43,53|44,48|44,52|45,52	Mbd3-As	EP	80.5	Neutrophil	6	1.03168	0.423029	0.730557	1.03168	1.80379	1.19581	1.80379	EP	0.423029	0.413189	0.00298336	0.25438	0.673721	0.394962	0.404836	0.417546	0.421183	0.409338	0.41219	9.59999e-05	0.376995	0.423113	0.395152	0.403774	0.416791	0.418192	107	47	0	6	0.577848	1.7822	0.24922	2.1271	5	FALSE	0
spcln319	847	125	25	Rcor1	28.04	60.76	24,61|25,61|25,64|26,62|26,63|27,57|27,58|27,59|27,60|27,61|27,62|27,64|28,60|28,63|29,59|29,60|29,61|29,62|30,59|30,61|31,59|31,60|31,61|31,62	Rcor1-As	Macrophage Ly6c+	44.8	pDC	26.4	0.308252	0.392217	0.392217	0.308252	0.951798	0.368676	0.762394	DBL	0.392217	0.464407	0.0335295	0.031821	0.614407	0.049878	0.348903	0.504352	0.56966	0.470396	0.475496	0.00822476	0.160671	0.614407	0.3757	0.435788	0.517564	0.577822	56	24	1	6	1.30756	3.69716	0.682075	2.10037	5	TRUE	3
spcln3_cln000404_cc679	847	118	47	Cebpa	54.06	18.02	48,18|49,18|50,16|50,17|50,18|50,21|51,15|51,16|51,18|51,19|51,21|51,22|52,16|52,19|52,20|53,16|53,17|53,18|53,19|54,20|54,21|55,15|55,16|55,17|55,18|55,19|55,20|56,16|56,18|56,20|56,21|57,15|57,16|57,17|57,18|57,20|58,16|58,18|58,20|59,17|59,19|60,18|60,19	Cebpa-BR	EP	95.8	DBL	1.7	1.16562	0.407629	0.73598	1.16562	1.93842	1.18904	1.93842	EP	0.407629	0.413392	0.000317111	0.277837	0.423146	0.387968	0.403374	0.418219	0.420959	0.40929	0.413577	0.000139612	0.375403	0.423146	0.388858	0.403779	0.418221	0.42096	113	43	4	2	0.087705	1.09167	0.0341777	2.07555	3	FALSE	0
spcln1_cln003634_cc215	847	108	41	Cebpa	14.1	51.85	10,54|11,54|12,51|12,52|12,54|12,55|13,46|13,47|13,48|13,49|13,50|13,51|13,52|13,54|13,55|13,56|14,48|14,49|14,50|14,52|14,53|14,54|14,55|14,56|15,48|15,50|15,53|15,56|16,49|16,50|16,51|16,52|16,53|16,54|16,55|17,49|17,53|17,54	Cebpa-BR	EP	100	B	0	1.21273	0.412461	0.749212	1.21273	1.83846	1.21273	1.83846	EP	0.412461	0.414596	7.48227e-05	0.386838	0.422855	0.399511	0.40887	0.418527	0.421343	0.412461	0.414596	7.48227e-05	0.386838	0.422855	0.399511	0.40887	0.418527	0.421343	108	38	3	1	0	1	0	2.03743	1	FALSE	0
spcln4_cln000597|cln000658_cc1134	847	102	26	Mbd3	57.69	58.38	54,62|55,62|56,62|57,54|57,56|57,57|57,58|57,59|57,60|57,61|58,54|58,55|58,56|58,61|59,54|59,56|59,57|59,58|59,59|59,60|59,61|59,62	Mbd3-As	EP	97.1	Neutrophil	2	1.29372	0.422574	0.761684	1.29372	1.869	1.32476	1.869	EP	0.422574	0.419069	0.000834258	0.408375	0.6346	0.415172	0.417085	0.420402	0.422114	0.418515	0.419043	8.11311e-06	0.408375	0.424697	0.415113	0.417055	0.420289	0.421926	99	22	4	2	0.0972675	1.10216	0.0388197	2.01284	4	FALSE	0
spcln3_cln000666|cln000944|cln001411_cc719	847	101	52	Multiple																																											3	FALSE
spcln282	847	100	26	Mbd3	66.54	56.08	64,58|65,54|65,56|65,57|65,58|65,59|66,53|66,54|66,55|66,56|66,59|67,52|67,54|67,57|67,58|67,59|68,54|68,55|68,56|68,57|69,55|69,56	Mbd3-As	EP	97	DBL	2	1.3315	0.418446	0.760083	1.3315	1.91924	1.34671	1.91924	EP	0.418446	0.41851	1.39494e-05	0.40674	0.424222	0.413462	0.417274	0.421335	0.422202	0.418446	0.41851	1.39494e-05	0.40674	0.424222	0.413462	0.417274	0.421335	0.422202	97	22	4	1	0	1	0	2.00432	4	FALSE	0
spcln1_cln000404_cc47	847	99	42	Cebpa	25.98	35.19	10,51|22,33|22,37|23,32|23,33|23,34|23,37|24,33|24,34|24,35|24,36|25,31|25,32|25,33|25,34|25,35|25,36|25,37|25,38|26,33|26,34|26,36|26,37|26,38|27,32|27,33|27,34|27,37|27,38|28,33|28,35|28,38|29,35|29,36|29,37|30,33|30,34|30,35|30,37|31,32|31,34|31,36	Cebpa-BR	EP	99	DBL	1	1.28298	0.414097	0.752184	1.28298	1.98811	1.28525	1.98811	EP	0.414097	0.41862	0.000149069	0.343523	0.423994	0.397202	0.412509	0.420727	0.422639	0.414097	0.41862	0.000149069	0.343523	0.423994	0.397202	0.412509	0.420727	0.422639	98	42	0	1	0	1	0	2	1	FALSE	0
spcln5_cln000505_cc1724	847	97	41	Mbd3	33.39	40.88	29,39|29,42|30,38|30,40|30,41|30,42|30,43|31,38|31,39|31,41|31,42|32,38|32,40|32,41|32,42|33,37|33,38|33,39|33,41|33,42|33,43|34,39|34,40|34,41|34,43|35,38|35,39|35,41|35,42|35,43|35,44|36,40|36,41|36,44|37,40|37,41|37,42|37,43|37,44	Mbd3-As	EP	86.6	Macrophage Ly6c+	5.2	1.12236	0.42239	0.733944	1.12236	1.74675	1.23357	1.74675	EP	0.42239	0.41607	0.00202396	0.372135	0.643115	0.388766	0.408742	0.419718	0.423017	0.410619	0.41515	0.000152392	0.372135	0.423123	0.387777	0.406849	0.41944	0.421263	84	39	2	4	0.408603	1.50471	0.180136	1.99123	5	FALSE	0
spcln3_cln000030|cln000031_cc629	847	94	30	Multiple																																											3	FALSE
spcln4_cln001113_cc1249	847	93	32	Irf8	56.56	55.56	53,54|53,59|53,60|53,61|54,53|54,58|54,59|55,52|55,53|55,58|55,59|56,52|56,59|57,52|57,54|57,55|57,56|57,57|57,59|58,51|58,55|58,56|58,57|58,58|59,50|59,51|59,52|59,53|59,54|59,56|59,57|59,58	Irf8-TF1.Br-1	Neutrophil	95.7	DBL	2.2	0.270066	0.572519	0.765976	0.270066	0.878022	0.27161	0.878022	NK	0.572519	0.583347	0.0085657	0.131243	0.677457	0.510045	0.564041	0.629568	0.656232	0.577477	0.583749	0.00642539	0.295894	0.677457	0.521706	0.56514	0.629586	0.656294	89	32	0	3	0.120874	1.12848	0.0432315	1.97313	4	FALSE	1
spcln320_cc0	847	92	52	Rcor1	55	55.04	51,52|51,55|52,52|52,54|52,58|52,59|52,60|53,50|53,51|53,52|53,53|53,54|53,55|53,57|53,58|53,59|53,61|54,51|54,54|54,55|54,57|54,59|54,60|55,51|55,52|55,53|55,54|55,58|55,59|55,60|55,61|56,53|56,56|56,58|57,50|57,52|57,53|57,56|57,57|58,51|58,52|58,54|58,55|58,56|58,57|58,58|59,52|59,55|59,56|60,52	Rcor1-As-1	Macrophage Ly6c+	90.2	DBL	6.5	0.178463	0.57117	0.57117	0.178463	0.983248	0.228994	0.983248	Macrophage Ly6c+	0.57117	0.575795	0.00312529	0.218911	0.646977	0.522284	0.547238	0.60075	0.633482	0.575414	0.576062	0.00163193	0.4692	0.646977	0.523923	0.54807	0.600903	0.633793	83	50	2	4	0.189652	1.20883	0.0681449	1.96848	4	FALSE	2
spcln283_bcsplit1_cc0	847	88	54	Mbd3	36.85	45.02	29,40|29,41|29,42|30,40|30,42|31,42|31,43|32,42|33,42|34,42|34,44|34,47|35,42|35,43|35,45|35,47|35,48|36,41|36,42|36,43|36,44|36,45|36,46|36,47|36,48|36,49|36,50|37,42|37,48|37,50|38,42|38,43|38,47|38,48|39,46|39,47|39,48|39,49|40,43|40,45|40,46|40,47|41,42|41,43|41,44|41,45|41,46|41,47|42,43|42,48|42,49|42,50|43,47|43,49	Mbd3-As	EP	93.2	DBL	2.3	1.14687	0.411665	0.747767	1.14687	1.79125	1.20618	1.79125	EP	0.411665	0.416363	0.000110437	0.385741	0.423314	0.390749	0.408351	0.419331	0.420871	0.411665	0.416363	0.000110437	0.385741	0.423314	0.390749	0.408351	0.419331	0.420871	82	54	0	3	0.129019	1.13771	0.0467687	1.94939	5	FALSE	0
spcln2_cln000330|cln000374|cln000822_cc347	847	88	42	Cebpa	31.57	26.4	29,24|29,26|29,27|29,28|29,29|29,31|30,21|30,22|30,23|30,24|30,28|30,29|30,30|30,31|30,32|31,22|31,25|31,26|31,27|31,28|31,29|31,31|32,23|32,24|32,25|32,26|32,27|32,28|32,29|33,23|33,25|33,26|33,28|33,29|34,22|34,24|34,25|34,26|34,27|35,26|35,27|36,26	Cebpa-BR	EP	94.3	Neutrophil	5.7	1.23913	0.428478	0.761465	1.23913	1.76339	1.3321	1.76339	EP	0.428478	0.41783	0.00227043	0.397456	0.635831	0.411675	0.415457	0.420187	0.422129	0.416909	0.417564	1.89557e-05	0.397456	0.423105	0.411279	0.415403	0.419672	0.421211	83	42	0	2	0.218121	1.24374	0.10718	1.94939	2	FALSE	0
spcln330	847	88	25	Tal1	64.24	52.76	62,52|63,49|63,50|63,52|63,53|63,55|63,56|64,49|64,50|64,51|64,52|64,53|64,54|64,55|64,56|65,50|65,51|65,52|65,53|65,54|65,55|65,56|66,52|66,54|67,55	Tal1-TF1.Br-1	EP	97.7	DBL	2.3	1.3495	0.421167	0.765026	1.3495	1.89659	1.34956	1.89659	EP	0.421167	0.421441	3.88754e-06	0.412085	0.424908	0.418822	0.420345	0.422462	0.4229	0.421167	0.421441	3.88754e-06	0.412085	0.424908	0.418822	0.420345	0.422462	0.4229	86	25	0	1	0	1	0	1.94939	4	FALSE	0
spcln327	847	86	20	Smarcd2	50.55	43.75	48,42|48,43|49,41|49,42|49,43|50,41|50,42|50,43|50,44|51,43|51,44|51,45|51,46|51,48|52,42|52,44|52,45|52,46|52,47|53,44	Smarcd2-As	EP	96.5	DBL	1.2	1.32319	0.420956	0.761048	1.32319	1.80493	1.34566	1.80493	EP	0.420956	0.41992	0.000575081	0.386128	0.632196	0.414284	0.417553	0.421527	0.422367	0.418411	0.419892	3.13623e-05	0.386128	0.424211	0.414261	0.417538	0.42151	0.422284	83	20	0	3	0.127783	1.13631	0.0462284	1.93952	4	FALSE	0
spcln1_cln000434_cc49	847	85	20	Hoxa7	13.4	30.15	10,30|10,31|11,29|11,30|12,29|12,30|12,31|13,29|13,31|13,32|14,29|14,30|14,31|14,33|15,29|16,29|16,30|17,30|18,30	Hoxa7-TF1.Br	EP	98.8	DBL	1.2	1.23207	0.412621	0.749502	1.23207	1.9182	1.23768	1.9182	EP	0.412621	0.416434	8.53067e-05	0.386808	0.421916	0.39613	0.410221	0.418852	0.420442	0.412621	0.416434	8.53067e-05	0.386808	0.421916	0.39613	0.410221	0.418852	0.420442	84	19	1	1	0	1	0	1.9345	1	FALSE	0
spcln313	847	85	31	Phf10	15.61	52.48	13,51|13,52|13,53|13,54|13,56|14,51|14,52|14,53|14,54|14,55|14,56|15,50|15,52|15,53|15,55|16,50|16,51|16,52|16,53|16,54|16,55|17,50|17,51|17,52|17,53|17,55|18,52|19,49|19,50|19,51|19,52	Phf10-As-1	EP	100	B	0	1.26004	0.412078	0.748517	1.26004	1.94767	1.26004	1.94767	EP	0.412078	0.41842	0.000187576	0.355366	0.423216	0.393421	0.404923	0.42052	0.4216	0.412078	0.41842	0.000187576	0.355366	0.423216	0.393421	0.404923	0.42052	0.4216	85	31	0	1	0	1	0	1.9345	1	FALSE	0
spcln329_bcsplit0	847	85	45	Tal1	19.51	38	15,33|15,36|16,34|16,36|16,38|17,35|17,37|17,39|17,42|18,38|18,40|18,42|19,34|19,36|19,37|19,38|19,40|19,41|19,44|20,33|20,36|20,38|20,39|20,40|20,41|20,42|20,43|20,44|21,33|21,35|21,36|21,37|21,38|21,39|21,40|21,41|21,42|22,32|22,34|22,35|22,36|22,37|22,38|22,40|22,41	Tal1-TF1.Br-1	EP	96.5	DBL	3.5	1.37487	0.420636	0.764062	1.37487	1.96549	1.38306	1.96549	EP	0.420636	0.421006	4.25559e-06	0.411405	0.423868	0.417711	0.420039	0.421908	0.422692	0.420636	0.421006	4.25559e-06	0.411405	0.423868	0.417711	0.420039	0.421908	0.422692	82	45	0	1	0	1	0	1.9345	1	FALSE	0
spcln4_cln000573_cc1109	847	83	44	Multiple																																											4	FALSE
spcln3_cln000475_cc690	847	82	47	Mbd3	61.4	20.96	56,17|56,21|57,17|57,18|57,20|57,21|57,23|57,24|58,16|58,17|58,18|58,22|59,15|59,17|59,19|59,21|59,23|60,20|60,21|61,18|61,19|61,22|61,23|62,21|62,22|62,25|62,26|63,19|63,20|63,21|63,22|63,23|63,25|64,19|64,20|64,23|64,25|65,17|65,18|65,19|65,21|65,24|65,25|66,25|67,24|68,24|68,25	Mbd3-As	EP	73.2	Neutrophil	22	1.011	0.458363	0.765844	1.011	1.72854	1.2427	1.72854	EP	0.458363	0.418531	0.00688754	0.394843	0.666652	0.402909	0.414723	0.422575	0.597466	0.414221	0.417422	5.84088e-05	0.394843	0.423367	0.401153	0.410401	0.419044	0.421171	60	47	0	4	0.660935	1.9366	0.386562	1.91908	3	FALSE	4
spcln1_cln003579_cc212	847	79	30	Multiple																																											1	FALSE
spcln278_bcsplit0_cc0	847	77	39	Mbd3	41.51	30.08	36,29|36,30|36,31|36,32|37,28|37,32|38,29|38,30|38,32|39,29|39,30|39,31|39,32|39,33|40,30|40,32|41,28|41,29|41,30|41,32|42,28|42,31|42,32|42,33|43,27|43,29|43,30|43,32|44,29|44,30|45,29|45,31|46,30|47,27|47,28|47,29|47,30|48,29|48,30	Mbd3-As	EP	83.1	cDC	9.1	0.880274	0.417404	0.744199	0.880274	1.73999	1.11097	1.73999	EP	0.417404	0.410783	0.00279981	0.384147	0.671868	0.390795	0.396448	0.418274	0.420049	0.406306	0.409479	0.000131314	0.384147	0.420427	0.390772	0.396275	0.417255	0.419522	64	39	0	4	0.543012	1.72118	0.261333	1.89209	2	FALSE	0
spcln2_cln001368_cc446	847	75	27	Kmt2a	25.37	29.3	21,28|22,25|22,26|22,27|22,28|22,30|23,25|23,26|23,27|23,29|24,29|24,30|25,29|25,30|26,29|26,30|26,31|27,29|27,30|27,32|28,31|28,32|29,31|29,32|30,31|30,32|31,32	Kmt2a-Br	EP	100	B	0	1.33808	0.418828	0.760778	1.33808	1.8057	1.33808	1.8057	EP	0.418828	0.419466	1.50848e-05	0.399222	0.42359	0.415472	0.417853	0.421174	0.422226	0.418828	0.419466	1.50848e-05	0.399222	0.42359	0.415472	0.417853	0.421174	0.422226	75	27	0	1	0	1	0	1.88081	2	FALSE	0
spcln3_cln000007|cln000015_cc612	847	75	26	Multiple																																											3	TRUE
spcln286_cc0	847	72	19	NTC	9.05	41.68	7,40|7,41|7,42|7,44|8,39|8,41|8,42|8,44|9,40|9,42|9,43|10,42|10,43|10,44|11,39|11,40|11,41|11,42|11,43	NTC-Ms-3	Neutrophil	77.8	EP	5.6	0.36018	0.556405	0.742751	0.36018	0.871856	0.349894	0.871856	DBL	0.556405	0.596301	0.0131262	0.228971	0.706656	0.362834	0.531801	0.629592	0.668262	0.584045	0.601977	0.00818359	0.261316	0.706656	0.493929	0.564347	0.635583	0.673136	56	19	0	7	0.872977	2.39403	0.368974	1.86332	1	FALSE	1
spcln305	847	71	24	Pax5	10.88	33.75	7,35|7,36|8,35|8,36|8,37|9,33|9,35|10,32|10,33|10,34|10,35|10,36|11,32|11,33|12,32|12,33|13,31|13,32|13,33|13,34|13,35|14,33|15,32|15,33	Pax5-TF1.Br	EP	98.6	DBL	1.4	1.34844	0.41694	0.757347	1.34844	1.90441	1.3488	1.90441	EP	0.41694	0.418539	2.88203e-05	0.394569	0.423085	0.411921	0.415939	0.420124	0.421058	0.41694	0.418539	2.88203e-05	0.394569	0.423085	0.411921	0.415939	0.420124	0.421058	70	24	0	1	0	1	0	1.85733	1	FALSE	0
spcln3_cln000403|cln000634_cc673	847	71	41	Pax5	58.83	35.1	53,38|53,39|54,37|54,38|55,37|56,38|57,27|57,28|57,36|57,37|57,39|58,31|58,34|58,35|58,36|58,37|59,31|59,32|59,33|59,34|59,35|59,37|59,38|59,39|60,32|60,35|60,36|60,37|60,38|61,32|61,33|61,35|61,36|62,33|62,34|62,35|62,36|62,37|63,34|64,34	Pax5-TF1.Br	EP	97.2	DBL	1.4	1.32695	0.417685	0.7587	1.32695	1.94024	1.34242	1.94024	EP	0.417685	0.419689	3.30086e-05	0.392559	0.4235	0.412529	0.416012	0.420786	0.422002	0.417685	0.419689	3.30086e-05	0.392559	0.4235	0.412529	0.416012	0.420786	0.422002	69	40	1	1	0	1	0	1.85733	3	FALSE	0
spcln228_cc0	847	68	29	Cebpa	16.93	42.52	10,43|10,44|11,45|12,44|13,42|13,44|14,42|14,43|14,44|15,44|16,42|16,44|17,42|17,44|18,42|18,44|19,40|19,41|19,42|19,43|20,40|20,41|20,43|21,41|21,42|21,43|22,40|22,42	Cebpa-BR	EP	100	B	0	1.29953	0.416489	0.756528	1.29953	1.86182	1.29953	1.86182	EP	0.416489	0.418553	4.6206e-05	0.390155	0.422579	0.407555	0.415238	0.421073	0.421991	0.416489	0.418553	4.6206e-05	0.390155	0.422579	0.407555	0.415238	0.421073	0.421991	68	28	1	1	0	1	0	1.83885	1	FALSE	0
spcln4_cln000162_cc974	847	68	24	Runx1	58.54	45.58	55,45|56,45|56,46|56,48|57,42|57,45|57,46|57,47|57,48|58,43|58,44|58,47|59,45|59,46|59,47|60,44|60,45|60,46|60,47|61,44|61,45|61,46|61,48|62,45	Runx1-TF1.Br	Neutrophil	98.5	DBL	1.5	0.208974	0.617464	0.82664	0.208974	1.04086	0.200168	1.04086	DBL	0.617464	0.615888	0.00113386	0.530073	0.673739	0.58144	0.588884	0.650177	0.657564	0.617464	0.615888	0.00113386	0.530073	0.673739	0.58144	0.588884	0.650177	0.657564	67	24	0	1	0	1	0	1.83885	4	FALSE	1
spcln3_cln003703_cc880	847	64	26	Mbd2	51.65	18.38	48,18|49,18|50,16|50,17|50,18|50,19|51,17|51,19|51,20|51,21|51,22|52,15|52,16|52,17|52,18|52,19|52,20|52,21|53,16|53,17|53,18|53,21|54,18|55,19|55,20	Mbd2-As	EP	100	B	0	1.08026	0.406857	0.739033	1.08026	1.6746	1.08026	1.6746	EP	0.406857	0.407943	0.000110482	0.380979	0.422138	0.392027	0.399282	0.416597	0.419048	0.406857	0.407943	0.000110482	0.380979	0.422138	0.392027	0.399282	0.416597	0.419048	64	25	1	1	0	1	0	1.81291	3	FALSE	0
spcln278_bcsplit1_cc0	847	63	23	Mbd3	26.52	23.87	23,25|23,26|24,24|24,27|25,22|25,23|25,24|26,21|26,22|26,24|27,22|27,23|27,24|27,25|27,26|28,21|28,24|28,25|29,25|29,26|30,23|30,24	Mbd3-As	Neutrophil	60.3	Macrophage Ly6c+	19	0.377679	0.430523	0.544274	0.377679	1.58042	0.429536	0.974304	EP	0.430523	0.465592	0.0231203	0.03811	0.648241	0.255156	0.34979	0.567609	0.584676	0.428297	0.41589	0.0136154	0.238952	0.648241	0.258526	0.350931	0.518591	0.57332	38	22	1	8	1.22522	3.4049	0.566514	1.80618	2	TRUE	1
spcln2_cln006247_cc603	847	63	21	Irf8	22.81	26.33	21,25|21,26|21,27|21,28|21,29|22,25|22,28|22,29|23,25|23,27|23,28|24,24|24,25|24,26|24,27|25,24|25,26|26,25	Irf8-TF1.Br-1	EP	93.7	DBL	4.8	1.24769	0.415495	0.750253	1.24769	1.8182	1.28331	1.8182	EP	0.415495	0.415365	0.000418503	0.391837	0.561506	0.402921	0.409931	0.418124	0.420209	0.413021	0.415352	5.19166e-05	0.391837	0.42347	0.402756	0.409875	0.417945	0.420183	59	18	3	2	0.0847661	1.08846	0.0327778	1.80618	2	FALSE	0
spcln5_cln001333_cc1936	847	63	21	NTC	28.1	51.33	25,51|25,52|25,54|26,51|26,52|26,53|27,50|27,51|27,52|27,53|28,51|29,50|29,51|29,52|30,49|30,50|30,51|30,52|31,50|31,52|32,51	NTC-Ms-1	EP	96.8	DBL	3.2	1.32709	0.417981	0.759239	1.32709	1.80973	1.33958	1.80973	EP	0.417981	0.418316	2.35845e-05	0.401857	0.426189	0.412092	0.415753	0.42174	0.422889	0.417981	0.418316	2.35845e-05	0.401857	0.426189	0.412092	0.415753	0.42174	0.422889	61	21	0	1	0	1	0	1.80618	5	FALSE	0
spcln3_cln001978|cln003575_cc834	847	62	38	Multiple																																											3	FALSE
spcln4_cln000643|cln000645_cc1182	847	62	25	Multiple																																											4	FALSE
spcln271	847	61	25	Irf8	28.6	67.64	25,70|26,67|26,68|26,70|27,66|27,67|27,68|27,69|27,70|27,71|28,69|29,65|29,66|29,67|29,68|29,70|30,65|30,67|30,68|31,64|31,65|31,66|31,68|31,69|32,68	Irf8-TF1.Br	EP	98.4	DBL	1.6	1.25072	0.411336	0.747168	1.25072	1.80789	1.24975	1.80789	DBL	0.411336	0.416677	0.000141279	0.381699	0.423218	0.388225	0.407485	0.418807	0.421306	0.411336	0.416677	0.000141279	0.381699	0.423218	0.388225	0.407485	0.418807	0.421306	60	25	0	1	0	1	0	1.79239	5	FALSE	0
spcln290	847	61	32	NTC	24.84	11.25	21,10|21,11|21,12|21,13|22,9|22,11|22,13|22,14|23,10|23,11|23,12|23,13|24,8|24,9|24,10|24,11|24,12|25,11|26,9|26,10|26,11|26,12|27,9|27,10|27,12|28,11|29,12|29,14|30,13|31,12|32,13	NTC-Ms-4	Macrophage Ly6c+	68.9	Neutrophil	29.5	0.11824	0.57358	0.63218	0.11824	1.1201	-0.043548	0.94798	Neutrophil	0.57358	0.561682	0.00887678	0.421588	0.876052	0.461656	0.508385	0.610355	0.663644	0.572281	0.549669	0.0118258	0.421588	0.876052	0.451455	0.498523	0.630847	0.706385	42	31	1	3	0.6845	1.98278	0.438592	1.79239	2	FALSE	2
spcln2_cln000093|cln003527_cc320	847	61	22	NTC	43.73	30	40,29|40,30|40,33|41,29|41,30|41,31|41,32|42,30|43,30|43,31|43,32|44,31|44,32|45,29|45,30|46,29|46,30|47,28|47,29|47,30|48,27|48,28	NTC-Ms-1	EP	100	B	0	1.17439	0.412396	0.749093	1.17439	1.92348	1.17439	1.92348	EP	0.412396	0.413185	4.52401e-05	0.393355	0.42205	0.403247	0.407819	0.418267	0.420493	0.412396	0.413185	4.52401e-05	0.393355	0.42205	0.403247	0.407819	0.418267	0.420493	61	22	0	1	0	1	0	1.79239	2	FALSE	0
spcln4_cln001573_cc1322	847	60	19	Atf7ip	58.58	59.47	55,60|55,61|56,60|57,57|57,58|57,60|58,57|58,58|58,59|58,60|58,61|59,59|59,60|59,62|60,59|61,60|62,60|63,59|63,60	Atf7ip-Br-1	EP	100	B	0	1.2928	0.4148	0.75346	1.2928	1.74349	1.2928	1.74349	EP	0.4148	0.418554	8.3995e-05	0.382978	0.4226	0.403568	0.414595	0.420041	0.421247	0.4148	0.418554	8.3995e-05	0.382978	0.4226	0.403568	0.414595	0.420041	0.421247	60	19	0	1	0	1	0	1.78533	4	FALSE	0
spcln4_cln001783_cc1347	847	59	33	Multiple																																											4	FALSE
spcln3_cln000666|cln000944|cln001411_cc725	847	58	36	Multiple																																											3	FALSE
spcln4_cln000643_cc1178	847	58	26	Multiple																																											4	FALSE
spcln1_cln000549|cln002067_cc86	847	56	25	Multiple																																											1	FALSE
spcln3_cln002238_cc845	847	53	22	Mbd3	59.09	30.36	55,30|56,30|57,29|57,30|57,31|58,29|58,30|58,32|58,33|59,27|59,29|59,31|60,28|60,30|60,31|61,29|61,30|61,31|61,32|61,33|62,31|62,32	Mbd3-As	EP	94.3	Neutrophil	3.8	1.25746	0.426827	0.764149	1.25746	1.82626	1.29865	1.82626	EP	0.426827	0.420831	0.00135378	0.40687	0.626229	0.416677	0.41779	0.422081	0.422817	0.419606	0.420649	1.10205e-05	0.40687	0.423384	0.416627	0.417786	0.421806	0.42275	50	22	0	2	0.163024	1.17706	0.0739645	1.73239	3	FALSE	0
spcln4_cln006150_cc1528	847	53	11	Cebpa	65.09	57.73	63,58|63,59|64,60|65,56|65,57|65,58|65,59|66,56|66,59|67,56|67,57	Cebpa-BR	EP	100	B	0	1.36287	0.418038	0.759342	1.36287	1.95774	1.36287	1.95774	EP	0.418038	0.419664	4.31867e-05	0.38359	0.423063	0.414772	0.417331	0.421125	0.422191	0.418038	0.419664	4.31867e-05	0.38359	0.423063	0.414772	0.417331	0.421125	0.422191	53	11	0	1	0	1	0	1.73239	4	FALSE	0
spcln2_cln001991_cc497	847	51	20	Wdr82	30.4	19.65	29,17|29,18|29,19|29,20|29,21|29,23|30,16|30,18|30,19|30,20|30,21|30,22|30,23|31,18|31,20|31,22|32,17|32,20|33,20|34,19	Wdr82-Br	EP	96.1	DBL	2	1.25001	0.417922	0.7531	1.25001	1.90163	1.28094	1.90163	DBL	0.417922	0.416108	0.00101217	0.391882	0.631372	0.399386	0.40995	0.419751	0.421271	0.413566	0.415664	6.47037e-05	0.391882	0.422857	0.399376	0.409799	0.419272	0.420911	49	20	0	2	0.0980391	1.10301	0.0392	1.716	2	FALSE	0
spcln4_cln001380_cc1305	847	50	19	Tal1	64.58	48.16	62,48|62,50|62,51|62,52|63,49|64,46|64,47|64,49|64,50|65,46|65,48|65,49|65,50|66,46|66,48|67,45|67,46|67,47|67,48	Tal1-TF1.Br-1	EP	100	B	0	1.32596	0.415788	0.755255	1.32596	2.087	1.32596	2.087	EP	0.415788	0.417637	5.629e-05	0.388229	0.423518	0.407815	0.415902	0.419881	0.421179	0.415788	0.417637	5.629e-05	0.388229	0.423518	0.407815	0.415902	0.419881	0.421179	50	19	0	1	0	1	0	1.70757	4	FALSE	0
spcln284_bcsplit0_cc0	847	49	18	NTC	32	39.33	29,39|30,38|30,40|31,38|31,39|31,41|31,42|32,38|32,39|32,41|33,37|33,38|33,39|33,40|33,41|33,42|34,38|35,38	NTC-Ms-1	EP	98	DBL	2	1.39056	0.417866	0.75903	1.39056	1.78595	1.40235	1.78595	EP	0.417866	0.418941	1.92384e-05	0.400812	0.42439	0.412732	0.415926	0.421166	0.422212	0.417866	0.418941	1.92384e-05	0.400812	0.42439	0.412732	0.415926	0.421166	0.422212	48	18	0	1	0	1	0	1.69897	5	FALSE	0
spcln305_bcsplit0	847	49	14	Pax5	10.43	33.93	7,35|8,35|8,36|9,33|9,35|10,33|10,35|11,33|11,34|12,33|12,34|13,32|13,33|13,34	Pax5-TF1.Br	EP	100	B	0	1.35281	0.421328	0.765318	1.35281	1.68701	1.35281	1.68701	EP	0.421328	0.421729	2.43375e-06	0.415798	0.423685	0.419142	0.420688	0.422439	0.422935	0.421328	0.421729	2.43375e-06	0.415798	0.423685	0.419142	0.420688	0.422439	0.422935	49	14	0	1	0	1	0	1.69897	1	FALSE	0
spcln5_cln003709_cc2105	847	49	18	Hdac1	26.94	52.72	25,51|25,52|25,53|25,56|26,51|26,53|26,54|26,55|27,51|27,52|27,53|27,54|28,53|29,52|29,53|30,52|31,52	Hdac1-Br	EP	98	DBL Aggregate	2	1.11368	0.410849	0.746285	1.11368	1.70227	1.12154	1.70227	EP	0.410849	0.414702	8.85865e-05	0.385585	0.420572	0.396019	0.404306	0.418154	0.419215	0.410849	0.414702	8.85865e-05	0.385585	0.420572	0.396019	0.404306	0.418154	0.419215	48	17	1	1	0	1	0	1.69897	5	FALSE	0
spcln4_cln004358_cc1510	847	48	20	Elk4	57.9	58.65	56,58|57,56|57,57|57,58|57,59|57,60|57,61|58,56|58,61|58,62|59,56|59,57|59,58|59,59|59,60|59,61	Elk4-TF1.Br-1	EP	97.9	DBL Aggregate	2.1	1.22367	0.412296	0.748913	1.22367	1.89698	1.23461	1.89698	EP	0.412296	0.414511	8.91067e-05	0.387556	0.422284	0.397714	0.408625	0.419924	0.421057	0.412296	0.414511	8.91067e-05	0.387556	0.422284	0.397714	0.408625	0.419924	0.421057	47	16	4	1	0	1	0	1.6902	4	FALSE	0
spcln3_cln003578_cc865	847	47	31	Hdac1	67.23	36.81	63,35|64,36|65,34|65,37|65,41|66,34|66,35|66,36|66,37|66,40|66,42|67,33|67,34|67,35|67,38|67,39|67,42|67,43|68,34|68,35|68,39|68,44|69,33|69,34|69,36|69,37|69,38|70,32|70,35|70,36|70,37	Hdac1-Br	Macrophage Ly6c+	53.2	Neutrophil	31.9	0.424585	0.515107	0.566152	0.424585	0.963041	0.479898	0.841025	DBL	0.515107	0.56197	0.0175215	0.0735284	0.665928	0.291187	0.456852	0.606478	0.63312	0.594719	0.597099	0.00172606	0.509171	0.665928	0.542584	0.569661	0.628302	0.642305	25	31	0	7	1.16606	3.20931	0.594518	1.68124	3	FALSE	2
spcln5_cln000170_cc1633	847	47	32	Mbd3	32.69	45.53	29,44|30,45|30,46|30,49|31,42|31,44|31,45|31,46|31,47|31,48|31,49|32,42|32,44|32,46|32,49|33,42|33,43|33,46|33,48|34,41|34,42|34,46|34,47|34,48|34,49|34,50|35,41|35,43|35,44|35,48|36,46|36,47	Mbd3-As	EP	78.7	Neutrophil	8.5	0.880482	0.391623	0.678933	0.880482	1.74859	1.04949	1.74859	EP	0.391623	0.39907	0.00524714	0.0330089	0.600444	0.374032	0.384723	0.417288	0.421017	0.402236	0.400716	0.000226448	0.373222	0.422533	0.383899	0.38811	0.41723	0.420202	37	32	0	7	0.80366	2.2337	0.3431	1.68124	5	FALSE	0
spcln5_cln000722_cc1879	847	47	28	Kmt2a	29.79	43.79	27,44|27,46|27,47|28,43|28,45|28,46|28,47|29,41|29,42|29,43|29,44|29,45|29,46|29,47|30,40|30,41|30,44|30,46|31,41|31,42|31,43|31,45|32,40|32,42|32,44|32,45|33,41|33,46	Kmt2a-Br	EP	85.1	DC	4.3	1.13903	0.43186	0.759443	1.13903	1.85175	1.34661	1.85175	EP	0.43186	0.420227	0.0030272	0.377044	0.660201	0.410383	0.418188	0.422199	0.422996	0.417642	0.419913	6.53299e-05	0.377044	0.423474	0.40916	0.418053	0.421717	0.422729	40	28	0	5	0.560646	1.7518	0.23913	1.68124	5	FALSE	0
spcln293_cc0	847	45	21	NTC	60.52	34.52	57,35|58,34|59,32|59,34|59,37|59,38|60,32|60,35|60,36|61,32|61,33|61,34|61,35|61,37|61,38|62,32|62,33|62,34|62,35|63,34|63,35	NTC-Ms-4	Neutrophil	37.8	Macrophage Ly6c+	24.4	0.0658016	0.599423	0.726592	0.0658016	1.00914	0.0516118	0.869232	Early T	0.599423	0.601611	0.00364061	0.445067	0.702393	0.511249	0.581353	0.643645	0.659513	0.618285	0.614574	0.00166466	0.51945	0.702393	0.585659	0.597228	0.643731	0.655633	17	21	0	6	1.53682	4.64977	0.747934	1.66276	3	FALSE	3
spcln2_cln001368|cln001578_cc452	847	44	20	Kmt2a	25.4	29	21,24|22,25|22,26|22,27|22,29|23,26|23,28|24,29|25,29|26,29|26,30|26,31|27,30|27,32|28,31|28,32|29,29|29,30|29,31|29,32	Kmt2a-Br	EP	100	B	0	1.2645	0.413506	0.751109	1.2645	1.75644	1.2645	1.75644	EP	0.413506	0.417106	8.13713e-05	0.383097	0.423541	0.400989	0.409177	0.41992	0.420967	0.413506	0.417106	8.13713e-05	0.383097	0.423541	0.400989	0.409177	0.41992	0.420967	44	20	0	1	0	1	0	1.65321	2	FALSE	0
spcln303_cc0	847	44	27	NTC	32.07	55.93	29,55|29,56|29,58|29,59|30,54|30,56|30,57|30,58|31,54|31,55|31,56|31,57|31,59|31,61|32,58|32,60|33,57|34,52|34,54|34,55|34,56|35,52|35,53|35,54|35,55|35,56|36,53	NTC-Ms-7	EP	100	B	0	1.25173	0.412668	0.749587	1.25173	1.68715	1.25173	1.68715	EP	0.412668	0.414982	5.52979e-05	0.390088	0.423322	0.401225	0.410923	0.417773	0.418599	0.412668	0.414982	5.52979e-05	0.390088	0.423322	0.401225	0.410923	0.417773	0.418599	44	27	0	1	0	1	0	1.65321	5	FALSE	0
spcln3_cln003567|cln003692_cc859	847	44	13	Multiple																																											3	FALSE
spcln3_cln001574|cln001577_cc803	847	43	26	Multiple																																											3	FALSE
spcln1_cln003645_cc221	847	41	18	Men1	15.61	51.44	13,52|14,50|14,52|15,50|15,51|15,53|15,55|16,48|16,49|16,50|16,51|16,52|16,53|16,54|16,55|17,48|17,54|18,49	Men1-As	EP	92.7	DBL	4.9	1.18069	0.422692	0.759761	1.18069	1.67712	1.23764	1.67712	EP	0.422692	0.419828	0.00151502	0.396356	0.655954	0.407252	0.414591	0.421621	0.422353	0.416553	0.419093	4.66972e-05	0.396356	0.422726	0.407052	0.414305	0.421537	0.422232	38	18	0	2	0.119247	1.12665	0.0499671	1.62325	1	FALSE	0
spcln3_cln001584_cc806	847	41	18	Mbd3	51.89	17.78	49,17|49,18|50,16|50,17|50,18|51,17|51,18|52,16|52,17|52,18|52,19|53,16|53,17|53,18|53,19|54,20|55,19|55,20	Mbd3-As	EP	97.6	Neutrophil	2.4	1.29633	0.422032	0.759017	1.29633	2.05018	1.33538	2.05018	EP	0.422032	0.419132	0.00139545	0.389812	0.650515	0.406504	0.416822	0.420504	0.421449	0.416319	0.419095	5.91817e-05	0.389812	0.423003	0.405741	0.416793	0.420377	0.421428	40	18	0	2	0.114665	1.1215	0.0475907	1.62325	3	FALSE	0
spcln4_cln001921_cc1356	847	41	25	Men1	59.24	49.52	56,48|57,47|57,48|57,50|57,52|57,53|58,46|58,47|58,50|58,51|59,48|59,49|59,50|59,52|60,48|60,50|60,51|60,52|61,48|61,50|61,51|62,47|62,48|62,51|63,51	Men1-As	EP	53.7	Neutrophil	43.9	0.540206	0.494024	0.759834	0.540206	1.61562	0.952123	1.61562	EP	0.494024	0.421602	0.0132766	0.366348	0.669916	0.380948	0.39907	0.641091	0.660758	0.399482	0.400851	0.000338586	0.366348	0.422269	0.378867	0.386732	0.417295	0.421342	22	25	0	3	0.78602	2.19464	0.518739	1.62325	4	FALSE	4
spcln5_cln001863_cc1979	847	41	11	Mbd3	28.82	46.45	27,45|27,46|27,47|28,46|28,47|29,46|29,47|30,46|30,47|31,46|31,48	Mbd3-As	EP	95.1	Lymphoid Progenitor	2.4	1.24042	0.415158	0.754112	1.24042	1.66857	1.3088	1.66857	EP	0.415158	0.417166	4.66208e-05	0.390167	0.422884	0.406752	0.414406	0.419316	0.420994	0.415158	0.417166	4.66208e-05	0.390167	0.422884	0.406752	0.414406	0.419316	0.420994	39	11	0	3	0.228721	1.25699	0.0939917	1.62325	5	FALSE	0
spcln4_cln001922|cln003940_cc1362	847	40	20	Multiple																																											4	FALSE
spcln5_cln001147_cc1909	847	40	18	Elk4	32.78	46.5	29,46|29,47|30,46|31,45|31,46|31,47|32,46|32,47|33,46|33,47|34,46|34,47|34,48|35,45|35,46|35,47|36,47|36,48	Elk4-TF1.Br	Neutrophil	85	EP	7.5	0.358762	0.570766	0.770189	0.358762	0.998759	0.360289	0.998759	EP	0.570766	0.590782	0.00975467	0.179996	0.671035	0.499372	0.572324	0.616447	0.651998	0.600985	0.591776	0.00117508	0.535422	0.671035	0.564864	0.576344	0.621718	0.653118	34	18	0	5	0.609077	1.83873	0.27	1.61278	5	FALSE	1
spcln3_cln001978_cc824	847	39	23	Multiple																																											3	FALSE
spcln234_bcsplit0	847	38	14	Cebpa	28.21	59.36	26,57|27,57|27,59|27,60|27,61|28,58|28,59|28,60|28,62|29,59|29,61|30,59|30,60|31,59	Cebpa-BR	EP	94.7	DBL	5.3	1.27432	0.414918	0.753675	1.27432	1.90514	1.27172	1.90514	DBL	0.414918	0.4181	8.11513e-05	0.38646	0.422193	0.402797	0.413347	0.420657	0.421622	0.414918	0.4181	8.11513e-05	0.38646	0.422193	0.402797	0.413347	0.420657	0.421622	36	14	0	1	0	1	0	1.59106	5	FALSE	0
spcln316_cc0	847	38	18	Rcor1	28.06	18.61	26,21|26,22|27,17|27,18|27,19|27,20|27,21|27,22|28,17|28,18|28,19|29,16|29,17|29,19|29,20|30,16|30,17|31,16	Rcor1-As	Macrophage Ly6c+	94.7	BMP	2.6	0.0756602	0.474997	0.474997	0.0756602	0.818632	0.0749655	0.818632	HSC	0.474997	0.565548	0.0316495	0.0462142	0.633648	0.0786242	0.475282	0.573691	0.590295	0.486908	0.565621	0.0271549	0.0612449	0.633648	0.169319	0.47819	0.573847	0.590375	36	18	0	3	0.242673	1.27465	0.101108	1.59106	2	TRUE	2
spcln4_cln000554_cc1104	847	37	24	NTC	57.96	50.29	55,49|55,51|55,52|56,48|56,52|57,49|57,50|57,51|57,52|57,53|58,49|58,50|58,51|59,48|59,49|59,50|59,52|59,53|59,54|60,47|60,49|60,50|60,52|61,46	NTC-Ms-6	EP	97.3	DBL	2.7	1.01222	0.404308	0.734402	1.01222	1.97515	1.01576	1.97515	EP	0.404308	0.405865	9.30758e-05	0.382288	0.421448	0.388769	0.397467	0.411574	0.414354	0.404308	0.405865	9.30758e-05	0.382288	0.421448	0.388769	0.397467	0.411574	0.414354	36	24	0	1	0	1	0	1.57978	4	FALSE	0
spcln2_cln003761_cc557	847	36	22	Hdac1	22.09	20.64	19,22|20,19|20,20|20,21|21,18|21,19|21,20|21,22|22,18|22,19|22,20|22,21|22,23|23,17|23,21|23,22|23,23|24,20|24,21|24,22|24,23|25,23	Hdac1-Br-1	EP	100	B	0	1.23295	0.415122	0.754045	1.23295	1.83312	1.23295	1.83312	EP	0.415122	0.417297	5.50664e-05	0.388749	0.422791	0.405527	0.41382	0.419667	0.420954	0.415122	0.417297	5.50664e-05	0.388749	0.422791	0.405527	0.41382	0.419667	0.420954	36	22	0	1	0	1	0	1.5682	2	FALSE	0
spcln4_cln000267_cc1014	847	36	20	NTC	57.2	47.05	55,44|55,49|56,45|56,46|56,47|56,48|56,50|57,45|57,46|57,47|57,48|58,44|58,45|58,46|58,48|58,50|59,46|59,48|59,49|59,50	NTC-Ms-5	Neutrophil	86.1	cDC	8.3	-0.278654	0.625837	0.83785	-0.278654	0.158115	-0.236263	0.158115	Neutrophil	0.625837	0.626774	0.000734014	0.576288	0.692531	0.599303	0.608823	0.640709	0.656975	0.625837	0.626774	0.000734014	0.576288	0.692531	0.599303	0.608823	0.640709	0.656975	31	20	0	3	0.41965	1.52143	0.207347	1.5682	4	FALSE	1
spcln4_cln000332_cc1024	847	36	20	Cited4	52.55	48.25	50,47|50,48|50,49|50,50|51,48|51,49|52,47|52,49|52,50|53,46|53,47|53,48|53,49|54,47|54,49|54,50|55,47|55,48|55,49	Cited4-TF1.Br	EP	91.7	DBL Aggregate	5.6	0.814099	0.39737	0.7218	0.814099	1.29495	0.84854	1.29495	EP	0.39737	0.398802	9.06292e-05	0.378624	0.415927	0.386942	0.388675	0.403689	0.410976	0.39737	0.398802	9.06292e-05	0.378624	0.415927	0.386942	0.388675	0.403689	0.410976	33	19	1	1	0	1	0	1.5682	4	FALSE	0
spcln4_cln003732|cln003889|cln004255_cc1482	847	36	18	Multiple																																											4	FALSE
spcln1_cln000197|cln000218_cc24	847	35	20	Hhex	18.5	33.4	16,31|16,32|16,33|16,36|17,33|17,35|17,36|18,31|18,32|18,33|18,34|19,33|19,34|19,35|20,33|20,34|21,32|21,34|22,33|22,34	Hhex-TF1.Br-1	pDC	34.3	Neutrophil	25.7	0.0241463	0.420408	0.545571	0.0241463	0.682528	-0.361291	0.301395	MEP	0.420408	0.505351	0.0325956	0.0279447	0.630536	0.179297	0.34055	0.552334	0.594836										12	20	0	7	1.67081	5.31647	0.77551	1.5563	1	FALSE	3
spcln331_bcsplit0	847	35	19	Tal1	38.68	60.05	35,61|36,61|36,62|37,62|38,57|38,58|38,59|38,61|39,57|39,59|39,60|40,58|40,59|40,60|40,61|40,62|40,63|41,58|41,63	Tal1-TF1.Br-1	EP	100	B	0	1.35339	0.420712	0.7642	1.35339	2.02756	1.35339	2.02756	EP	0.420712	0.421064	3.79865e-06	0.415896	0.4231	0.418141	0.419346	0.422425	0.422902	0.420712	0.421064	3.79865e-06	0.415896	0.4231	0.418141	0.419346	0.422425	0.422902	35	19	0	1	0	1	0	1.5563	5	FALSE	0
spcln4_cln000030|cln000031_cc935	847	35	12	NTC	50.42	52	48,49|49,50|49,51|49,52|50,52|50,54|51,52|51,54|52,51|52,52|52,53|52,54	NTC-Ms-7	EP	80	DBL Aggregate	8.6	0.897315	0.422178	0.746558	0.897315	1.59053	1.05277	1.59053	EP	0.422178	0.412826	0.00359341	0.37444	0.644802	0.391245	0.399917	0.415666	0.423128	0.40679	0.411878	0.000172026	0.37444	0.423988	0.390598	0.398094	0.415087	0.420034	28	12	0	2	0.24493	1.27753	0.124444	1.5563	4	FALSE	0
spcln4_cln001146_cc1256	847	35	15	Cebpe	57.6	48.13	55,48|56,49|57,45|57,46|57,48|57,49|57,50|58,47|58,48|58,50|59,46|59,48|59,49|59,50	Cebpe-TF1.Br-1	EP	94.3	DBL	2.9	1.27539	0.42116	0.765012	1.27539	1.89788	1.31875	1.89788	EP	0.42116	0.421555	3.83856e-06	0.417034	0.4245	0.418211	0.419956	0.422619	0.423295	0.42116	0.421555	3.83856e-06	0.417034	0.4245	0.418211	0.419956	0.422619	0.423295	33	14	1	2	0.132691	1.1419	0.0570934	1.5563	4	FALSE	0
spcln5_cln001056|cln001597_cc1893	847	35	21	Gltscr1	33	45.76	29,48|30,46|30,47|31,42|31,43|31,44|31,45|31,47|32,46|33,45|33,46|34,46|34,47|34,48|35,45|35,46|35,47|36,44|36,45|36,46|36,48	Gltscr1-Br	Neutrophil	94.3	BMP	5.7	-0.23466	0.636851	0.852596	-0.23466	0.665107	-0.254608	0.201742	BMP	0.636851	0.635398	0.000489595	0.57856	0.676563	0.610138	0.624519	0.65279	0.667269	0.636851	0.635398	0.000489595	0.57856	0.676563	0.610138	0.624519	0.65279	0.667269	33	21	0	2	0.219033	1.24487	0.107755	1.5563	5	FALSE	1
spcln3_cln001515_cc799	847	34	18	Atf7ip	71.83	25.17	68,24|68,25|69,24|70,24|70,25|71,26|71,27|71,28|72,24|72,26|73,23|73,24|73,25|73,27|74,25|74,26|75,25|76,25	Atf7ip-Br	EP	67.6	Macrophage Ly6c+	11.8	0.839446	0.448206	0.714641	0.839446	1.52903	1.15608	1.52903	EP	0.448206	0.416734	0.0086603	0.199538	0.648259	0.401658	0.405459	0.44468	0.593874	0.410367	0.409336	8.32174e-05	0.390453	0.423873	0.401738	0.404568	0.418902	0.421035	23	18	0	4	0.865526	2.37626	0.451172	1.54407	3	FALSE	4
spcln4_cln000677|cln000832_cc1206	847	33	24	Hhex	60.71	65.5	57,66|57,67|58,62|58,64|58,65|58,66|58,68|59,63|59,64|59,66|59,67|60,64|60,66|61,64|62,65|62,66|62,67|63,67|64,65|64,66|64,67|65,64|65,66|65,67	Hhex-TF1.Br	Neutrophil	78.8	EP	12.1	-0.159248	0.599072	0.808153	-0.159248	1.09614	-0.255466	0.703768	EP	0.599072	0.645062	0.00915779	0.376524	0.669022	0.428347	0.607835	0.657413	0.661495	0.637118	0.652791	0.0028148	0.447175	0.669022	0.628342	0.642022	0.660853	0.663835	26	24	0	3	0.661613	1.93792	0.35629	1.53148	4	FALSE	1
spcln4_cln001212_cc1267	847	33	14	Mbd3	50.07	42.21	48,42|48,43|49,41|49,42|49,43|50,41|50,43|51,41|51,42|51,43|51,44|52,41|52,43	Mbd3-As	Neutrophil	57.6	Macrophage Ly6c+	18.2	0.283254	0.531772	0.687764	0.283254	1.16951	0.41062	0.936146	pDC	0.531772	0.577029	0.0203259	0.0368179	0.676937	0.366855	0.544823	0.591279	0.650214	0.583233	0.584188	0.00522661	0.324868	0.676937	0.561444	0.573764	0.607515	0.655918	19	13	1	8	1.37558	3.95736	0.62259	1.53148	4	TRUE	1
spcln4_cln002381|cln004301_cc1379	847	33	18	Mbd2	52.17	47.11	49,46|49,47|50,47|51,45|51,46|51,47|51,49|51,50|52,46|52,47|52,48|53,46|53,47|54,47|55,46|55,47|55,48|55,49	Mbd2-Br	EP	100	B	0	1.31925	0.416157	0.755925	1.31925	1.74764	1.31925	1.74764	EP	0.416157	0.417365	3.31453e-05	0.393117	0.422478	0.40982	0.413374	0.419932	0.421125	0.416157	0.417365	3.31453e-05	0.393117	0.422478	0.40982	0.413374	0.419932	0.421125	33	18	0	1	0	1	0	1.53148	4	FALSE	0
spcln2_cln000274_cc340	847	32	14	Runx1	44.29	25.21	43,21|43,25|43,29|44,22|44,23|44,25|44,26|44,29|45,24|45,25|45,26|45,27|45,28|46,23	Runx1-TF1.Br-1	EP	56.2	Neutrophil	43.8	0.472159	0.509869	0.791248	0.472159	1.49364	1.01151	1.49364	EP	0.509869	0.418229	0.0150337	0.385674	0.668305	0.387928	0.406073	0.647151	0.661536	0.404373	0.407606	0.000155013	0.385674	0.421424	0.386672	0.392377	0.41437	0.418043	18	14	0	2	0.685314	1.9844	0.492188	1.51851	2	FALSE	4
spcln4_cln004358_cc1508	847	32	9	Elk4	64.33	62.44	63,60|64,61|64,62|64,64|64,65|65,61|65,62|65,63|65,64	Elk4-TF1.Br-1	EP	100	B	0	1.1933	0.41015	0.745014	1.1933	1.64236	1.1933	1.64236	EP	0.41015	0.411985	9.07341e-05	0.39095	0.422634	0.395248	0.402761	0.417437	0.42045	0.41015	0.411985	9.07341e-05	0.39095	0.422634	0.395248	0.402761	0.417437	0.42045	32	9	0	1	0	1	0	1.51851	4	FALSE	0
spcln234_cc0	847	31	17	Cebpa	31.88	62.76	28,63|29,63|30,62|30,63|31,62|31,63|31,65|31,66|32,61|32,65|33,60|33,62|33,63|33,64|34,62|35,62|36,61	Cebpa-BR	EP	100	B	0	1.36043	0.41943	0.761871	1.36043	1.86036	1.36043	1.86036	EP	0.41943	0.420141	1.42408e-05	0.401455	0.423041	0.417831	0.418795	0.421031	0.422167	0.41943	0.420141	1.42408e-05	0.401455	0.423041	0.417831	0.418795	0.421031	0.422167	31	17	0	1	0	1	0	1.50515	5	FALSE	0
spcln3_cln001686_cc816	847	31	10	Phf10	57.2	22.7	55,23|56,22|56,23|57,22|57,23|57,24|58,22|58,23|59,22|59,23	Phf10-As-1	Neutrophil	96.8	BMP	3.2	-0.240822	0.652067	0.872966	-0.240822	0.286387	-0.241982	0.286387	BMP	0.652067	0.656875	0.00031793	0.602532	0.673498	0.622708	0.646296	0.664039	0.668917	0.652067	0.656875	0.00031793	0.602532	0.673498	0.622708	0.646296	0.664039	0.668917	30	10	0	2	0.142506	1.15316	0.062435	1.50515	3	FALSE	1
spcln5_cln000232|cln001435|cln001949_cc1665	847	31	14	Multiple																																											5	TRUE
spcln323_bcsplit0	847	30	23	Runx1	57.48	32.35	54,32|54,34|55,32|55,33|56,32|57,27|57,28|57,30|57,31|57,33|58,29|58,30|58,32|58,33|58,34|58,36|59,30|59,33|59,34|59,36|59,37|60,33|60,35	Runx1-TF1.Br-1	Neutrophil	56.7	Macrophage Ly6c+	20	0.294682	0.4095	0.517539	0.294682	0.969331	0.313236	0.969331	pDC	0.4095	0.439456	0.0338687	0.0359195	0.651922	0.176092	0.292075	0.55812	0.631204	0.446679	0.505452	0.0266158	0.166898	0.651922	0.2637	0.302477	0.582818	0.640786	17	23	0	8	1.39115	4.01946	0.628889	1.49136	3	FALSE	1
spcln2_cln001120|cln001245|cln001917_cc428	847	29	18	Multiple																																											2	FALSE
spcln4_cln000422|cln000643|cln000645_cc1058	847	29	19	Multiple																																											4	FALSE
spcln5_cln001333_cc1935	847	29	10	NTC	29.9	46.5	27,47|28,48|29,46|29,47|30,46|30,47|31,46|31,47|32,45|32,46	NTC-Ms-1	EP	100	B	0	1.39071	0.418562	0.760294	1.39071	2.01203	1.39071	2.01203	EP	0.418562	0.419053	1.68276e-05	0.408051	0.425136	0.413497	0.41582	0.421711	0.423174	0.418562	0.419053	1.68276e-05	0.408051	0.425136	0.413497	0.41582	0.421711	0.423174	29	10	0	1	0	1	0	1.47712	5	FALSE	0
spcln1_cln001264_cc129	847	28	13	Gltscr1	20.31	36.15	19,34|19,36|19,37|19,38|19,39|20,34|20,36|21,34|21,35|21,36|22,36|22,37|22,38	Gltscr1-Br	EP	96.4	DBL	3.6	1.42542	0.419676	0.762318	1.42542	1.86392	1.44216	1.86392	EP	0.419676	0.420585	6.46503e-06	0.413264	0.422876	0.416435	0.41811	0.421659	0.422264	0.419676	0.420585	6.46503e-06	0.413264	0.422876	0.416435	0.41811	0.421659	0.422264	27	13	0	1	0	1	0	1.4624	1	FALSE	0
spcln3_cln000659_cc714	847	28	7	Klf1	67.57	41.71	66,41|66,42|67,41|67,42|68,42|69,42|70,42	Klf1-TF1.Br-1	EP	100	B	0	1.09264	0.420476	0.76377	1.09264	1.62579	1.09264	1.62579	EP	0.420476	0.420367	4.71682e-06	0.41681	0.425279	0.417862	0.418875	0.421986	0.422994	0.420476	0.420367	4.71682e-06	0.41681	0.425279	0.417862	0.418875	0.421986	0.422994	28	7	0	1	0	1	0	1.4624	3	FALSE	0
spcln1_cln000514_cc62	847	27	15	Multiple																																											1	FALSE
spcln2_cln000899|cln001506|cln001643|cln002342_cc405	847	27	19	Multiple																																											2	FALSE
spcln318	847	27	10	Rcor1	52.6	40.9	51,41|51,42|52,40|52,41|52,42|53,39|53,40|53,41|54,42|55,41	Rcor1-As	Macrophage Ly6c+	88.9	DBL	11.1	0.195493	0.597684	0.597684	0.195493	0.863524	0.226389	0.863524	Macrophage Ly6c+	0.597684	0.603974	0.00161867	0.488558	0.662388	0.543722	0.583697	0.618217	0.641174	0.597684	0.603974	0.00161867	0.488558	0.662388	0.543722	0.583697	0.618217	0.641174	24	10	0	1	0	1	0	1.44716	4	FALSE	2
spcln321	847	27	22	Rcor1	32.32	48.14	29,46|29,47|29,48|29,50|30,46|30,47|30,51|30,52|31,48|31,49|31,50|31,52|32,46|32,47|33,46|34,47|35,47|35,48|36,47|37,48|38,48|39,49	Rcor1-As-1	cDC	66.7	DC	18.5	-0.340547	0.627079	0.839513	-0.340547	0.72058	-0.352331	0.288191	Neutrophil	0.627079	0.639578	0.00140646	0.572671	0.656488	0.590825	0.618056	0.648601	0.653334										18	22	0	3	0.865501	2.3762	0.499314	1.44716	5	FALSE	3
spcln1_cln001598|cln003579_cc149	847	26	10	Multiple																																											1	FALSE
spcln277	847	26	15	Mbd3	13.33	30.73	11,30|12,30|12,31|12,32|13,29|13,30|13,32|14,30|14,31|14,32|14,33|15,29|15,30|15,31	Mbd3-As	EP	92.3	DBL	7.7	0.924552	0.402316	0.730783	0.924552	1.98161	0.963001	1.98161	EP	0.402316	0.403141	8.28724e-05	0.382606	0.41715	0.390398	0.396569	0.408694	0.413274	0.402316	0.403141	8.28724e-05	0.382606	0.41715	0.390398	0.396569	0.408694	0.413274	24	14	1	1	0	1	0	1.43136	1	FALSE	0
spcln5_cln000487_cc1719	847	26	14	Cited2	37.43	57.79	35,58|36,56|36,57|36,58|37,58|37,59|37,60|38,56|38,58|38,59|39,56|39,57|39,58|39,59	Cited2-TF1.Br-1	Neutrophil	46.2	EP	38.5	0.561041	0.517464	0.7494	0.561041	1.27051	0.258882	0.8688	pDC	0.517464	0.55313	0.010077	0.396542	0.665231	0.403626	0.408904	0.59423	0.653331	0.607328	0.594443	0.00155295	0.552858	0.665231	0.566794	0.583492	0.651301	0.659729	12	14	0	4	1.09884	3.0007	0.62426	1.43136	5	FALSE	4
spcln1_cln003530|cln003706_cc199	847	25	11	Multiple																																											1	FALSE
spcln1_cln006193_cc256	847	25	14	Rcor1	12.36	40.07	10,40|11,39|11,40|12,37|12,38|12,42|12,43|13,38|13,39|13,40|13,41|13,42|14,40|14,42	Rcor1-As	pDC	40	Neutrophil	28	0.0757465	0.446475	0.571615	0.0757465	0.766517	0.173642	0.650858	Macrophage Ly6c+	0.446475	0.629968	0.067974	0.0378859	0.638562	0.0390352	0.29011	0.632345	0.636968										10	14	0	5	1.33857	3.81357	0.691871	1.41497	1	TRUE	3
spcln292	847	25	12	NTC	51.17	17.25	49,18|50,16|50,17|50,18|51,17|51,18|51,19|52,16|52,17|52,18|53,16|53,17	NTC-Ms-4	EP	84	DBL	4	0.895691	0.391793	0.689406	0.895691	1.6478	1.0068	1.6478	EP	0.391793	0.398207	0.000865143	0.286399	0.420786	0.358369	0.394051	0.408498	0.412453	0.39924	0.398217	0.000208075	0.353296	0.420786	0.386966	0.395361	0.409545	0.412473	21	12	0	4	0.514097	1.67213	0.229167	1.41497	3	FALSE	0
spcln2_cln001308|cln001516_cc440	847	25	12	Tal1	23	22.17	21,21|21,22|22,21|22,22|22,23|23,21|23,22|23,23|24,22|25,22|25,23|25,24	Tal1-TF1.Br-1	Macrophage Ly6c+	40	Neutrophil	24	0.375989	0.577069	0.661521	0.375989	0.94706	0.578282	0.874289	Macrophage Ly6c+	0.577069	0.583121	0.00581706	0.374643	0.684447	0.507475	0.57665	0.595067	0.655274	0.610048	0.594228	0.00176637	0.566298	0.684447	0.569663	0.579396	0.641474	0.666182	10	12	0	7	1.59742	4.94025	0.739583	1.41497	2	FALSE	3
spcln2_cln006114_cc586	847	25	8	Smarcd1	40.5	25	39,25|40,24|40,25|40,26|41,23|41,26|41,27|42,24	Smarcd1-As	Neutrophil	60	Macrophage Ly6c+	24	-0.00965833	0.569124	0.712023	-0.00965833	0.79138	0.0865091	0.79138	HSC	0.569124	0.588988	0.018218	0.0460341	0.668577	0.477353	0.543988	0.659611	0.666369	0.618672	0.65257	0.00316079	0.477214	0.668577	0.56916	0.582718	0.664027	0.667296	15	8	0	4	0.901959	2.46443	0.502836	1.41497	2	TRUE	1
spcln324_cc0	847	25	10	Runx1	58	60	56,60|57,58|57,59|57,61|58,60|58,61|59,59|59,60|59,61|60,61	Runx1-TF1.Br-1	EP	100	B	0	1.23274	0.419545	0.762079	1.23274	1.68623	1.23274	1.68623	EP	0.419545	0.420442	1.15461e-05	0.408637	0.424575	0.416433	0.417736	0.421688	0.42272	0.419545	0.420442	1.15461e-05	0.408637	0.424575	0.416433	0.417736	0.421688	0.42272	25	10	0	1	0	1	0	1.41497	4	FALSE	0
spcln3_cln000341_cc668	847	25	18	NTC	59.44	27.78	56,28|57,26|57,27|57,28|57,29|58,28|59,25|59,26|59,27|59,28|60,28|61,27|61,29|61,30|62,27|62,28|62,29|63,30	NTC-Ms-2	Macrophage Ly6c+	52	Neutrophil	20	0.37163	0.457615	0.497335	0.37163	0.839735	0.400666	0.743422	DC	0.457615	0.500313	0.0412829	0.04546	0.887151	0.23375	0.273168	0.604805	0.633921	0.577066	0.597022	0.0177659	0.344929	0.887151	0.405265	0.507608	0.618111	0.657453	13	18	0	7	1.39564	4.03758	0.649306	1.41497	3	FALSE	2
spcln3_cln003528_cc853	847	25	17	NTC	57.59	28.71	55,29|55,31|55,32|56,29|56,30|57,25|57,26|57,30|58,27|58,28|58,30|59,26|59,29|59,31|59,32|60,26|61,27	NTC-Ms-7	EP	96	DBL	4	1.19268	0.412865	0.749946	1.19268	1.61593	1.21043	1.61593	EP	0.412865	0.415401	0.000112893	0.382336	0.425285	0.400866	0.406457	0.420095	0.422719	0.412865	0.415401	0.000112893	0.382336	0.425285	0.400866	0.406457	0.420095	0.422719	24	17	0	1	0	1	0	1.41497	3	FALSE	0
spcln4_cln001113_cc1248	847	25	17	Irf8	62.71	56.82	61,55|61,56|61,59|62,55|62,56|62,57|62,58|62,59|63,54|63,56|63,57|63,58|63,60|64,56|64,57|65,56|65,57	Irf8-TF1.Br-1	Neutrophil	96	Early T	4	0.183877	0.602526	0.806642	0.183877	0.96692	0.184966	0.96692	Neutrophil	0.602526	0.600208	0.00429477	0.372223	0.666459	0.577818	0.583544	0.650402	0.657625	0.602526	0.600208	0.00429477	0.372223	0.666459	0.577818	0.583544	0.650402	0.657625	24	17	0	2	0.167944	1.18287	0.0768	1.41497	4	FALSE	1
spcln4_cln004357_cc1506	847	25	9	Mbd2	51.44	44.56	49,43|49,44|50,44|51,44|52,45|52,46|53,44|53,45|54,46	Mbd2-As	EP	100	B	0	1.24017	0.412245	0.74882	1.24017	1.76731	1.24017	1.76731	EP	0.412245	0.414908	4.73229e-05	0.399849	0.422508	0.401735	0.407108	0.417622	0.419444	0.412245	0.414908	4.73229e-05	0.399849	0.422508	0.401735	0.407108	0.417622	0.419444	25	9	0	1	0	1	0	1.41497	4	FALSE	0
spcln5_cln000247_cc1678	847	25	16	NTC	33.69	44.62	31,41|31,42|32,41|32,42|33,43|34,42|34,43|34,44|34,48|34,49|34,50|35,43|35,45|35,47|35,48|36,46	NTC-Ms-4	Neutrophil	88	Macrophage Ly6c+	8	-0.0290528	0.593905	0.780403	-0.0290528	1.0322	-0.0837839	1.0322	Macrophage Ly6c+	0.593905	0.622274	0.0151385	0.0551393	0.686316	0.522766	0.59591	0.649346	0.668124	0.625592	0.627715	0.00166944	0.500767	0.686316	0.587649	0.603861	0.657419	0.668628	22	16	0	3	0.443307	1.55785	0.2176	1.41497	5	TRUE	1
spcln5_cln000549|cln002067_cc1758	847	25	14	Multiple																																											5	FALSE
spcln5_cln000642_cc1839	847	25	11	Setdb1	26.82	53.45	25,52|26,53|26,54|26,57|27,52|27,53|27,55|27,56|28,51|28,52|28,53	Setdb1-B-1	Neutrophil	80	DBL	8	0.17732	0.507597	0.686855	0.17732	0.764041	0.239347	0.764041	EP	0.507597	0.567636	0.0174389	0.218305	0.675416	0.319636	0.40328	0.595625	0.62072	0.516928	0.574327	0.016432	0.218305	0.675416	0.315664	0.468358	0.596533	0.623105	20	11	0	4	0.53051	1.6998	0.238185	1.41497	5	FALSE	1
spcln1_cln000170_cc18	847	24	11	Mbd3	15.45	36.09	14,34|14,38|15,33|15,34|15,38|15,39|16,35|16,36|16,37|17,36|17,37	Mbd3-As	Neutrophil	62.5	Macrophage Ly6c+	20.8	0.390451	0.468186	0.591201	0.390451	0.769693	0.398387	0.769693	MEP	0.468186	0.505627	0.0166588	0.238557	0.658846	0.269531	0.335267	0.559267	0.598298	0.493392	0.53582	0.0139137	0.245041	0.658846	0.301106	0.479272	0.557714	0.589699	15	11	0	4	1.0347	2.81426	0.552083	1.39794	1	FALSE	1
spcln1_cln000549_cc78	847	24	13	Multiple																																											1	FALSE
spcln1_cln006207_cc264	847	24	8	Cebpa	13.62	40.88	13,39|13,40|13,41|13,42|14,40|14,41|14,42|15,42	Cebpa-BR	EP	100	B	0	1.2269	0.414192	0.752356	1.2269	1.77894	1.2269	1.77894	EP	0.414192	0.416711	7.56004e-05	0.388823	0.422944	0.40503	0.40832	0.420363	0.422321	0.414192	0.416711	7.56004e-05	0.388823	0.422944	0.40503	0.40832	0.420363	0.422321	24	8	0	1	0	1	0	1.39794	1	FALSE	0
spcln4_cln000979|cln000980_cc1232	847	24	15	Multiple																																											4	TRUE
spcln5_cln000197|cln000218_cc1649	847	24	16	Hhex	41.31	57.06	38,60|39,59|40,55|40,57|40,60|41,54|41,55|41,56|41,57|41,58|41,59|42,56|43,57|44,56|44,58|45,56	Hhex-TF1.Br-1	Neutrophil	41.7	pDC	16.7	0.0446625	0.448089	0.562191	0.0446625	0.961145	0.406279	0.961145	Neutrophil	0.448089	0.533676	0.0396576	0.0185116	0.671422	0.134245	0.371194	0.566334	0.588232	0.505226	0.553161	0.0154431	0.282191	0.671422	0.313002	0.451656	0.568456	0.596821	10	16	0	6	1.56916	4.8026	0.741021	1.39794	5	FALSE	3
spcln5_cln000197|cln000218_cc1653	847	24	14	Multiple																																											5	TRUE
spcln1_cln000639|cln001868_cc109	847	23	12	Tal1	19	48.25	17,49|17,50|18,49|19,46|19,47|19,48|19,49|19,50|19,51|20,47|21,46|21,47	Tal1-TF1.Br-1	EP	100	B	0	1.35054	0.418154	0.759553	1.35054	1.8887	1.35054	1.8887	EP	0.418154	0.419154	6.11213e-06	0.413877	0.421446	0.414487	0.416197	0.420246	0.420601	0.418154	0.419154	6.11213e-06	0.413877	0.421446	0.414487	0.416197	0.420246	0.420601	23	12	0	1	0	1	0	1.38021	1	FALSE	0
spcln1_cln001777|cln003576|cln003711_cc161	847	23	12	Multiple																																											1	FALSE
spcln279_cc0	847	23	6	Mbd3	30.83	9.67	29,9|30,9|31,9|31,10|32,10|32,11	Mbd3-As	EP	91.3	DBL	4.3	1.18292	0.417349	0.745463	1.18292	1.78201	1.20546	1.78201	EP	0.417349	0.409826	0.00140883	0.391846	0.581565	0.399508	0.404202	0.415807	0.420251	0.409529	0.409679	6.67129e-05	0.391846	0.423169	0.399368	0.403364	0.414965	0.419488	21	6	0	2	0.184907	1.20311	0.0867769	1.38021	2	FALSE	0
spcln2_cln000671_cc388	847	23	12	Hdac3	39.25	22.83	37,24|38,21|38,22|38,23|39,21|39,22|40,21|40,22|40,25|40,26|41,23|41,24	Hdac3-Br-1	Neutrophil	69.6	Macrophage Ly6c+	26.1	0.433585	0.49188	0.604108	0.433585	0.872966	0.47156	0.872966	MEP	0.49188	0.582539	0.0214737	0.230132	0.650174	0.260306	0.330472	0.593469	0.602324	0.476222	0.578145	0.0224568	0.247137	0.628482	0.273283	0.312123	0.590767	0.594287	16	12	0	3	0.739321	2.09451	0.446125	1.38021	2	FALSE	1
spcln3_cln001380_cc787	847	23	12	Tal1	67.5	42.58	64,42|65,42|66,42|67,41|67,42|67,43|68,43|68,44|69,42|69,43|70,43|70,44	Tal1-TF1.Br-1	EP	100	B	0	1.36123	0.416368	0.756308	1.36123	1.62865	1.36123	1.62865	EP	0.416368	0.416867	2.68891e-05	0.403875	0.423235	0.410914	0.414013	0.420341	0.421921	0.416368	0.416867	2.68891e-05	0.403875	0.423235	0.410914	0.414013	0.420341	0.421921	23	12	0	1	0	1	0	1.38021	3	FALSE	0
spcln1_cln000514|cln010392_cc71	847	22	10	Multiple																																											1	FALSE
spcln1_cln005307_cc240	847	22	13	Cebpa	19	32.85	16,32|17,33|18,32|18,33|18,34|19,32|19,34|20,32|20,33|20,34|21,33|22,32	Cebpa-BR	Neutrophil	86.4	HSC	9.1	-0.0756207	0.578224	0.772834	-0.0756207	0.861819	-0.171	0.494537	DBL	0.578224	0.631067	0.0324058	0.0323655	0.671705	0.581416	0.626858	0.643023	0.654342	0.634937	0.631141	0.000352522	0.581416	0.671705	0.623213	0.628067	0.643724	0.655671	19	12	1	2	0.314492	1.36956	0.172336	1.36173	1	TRUE	1
spcln4_cln000422|cln000643_cc1056	847	22	15	Multiple																																											4	FALSE
spcln4_cln006150_cc1529	847	22	8	Cebpa	58	58.12	57,57|57,58|57,59|58,58|58,59|59,57|59,58|59,59	Cebpa-BR	EP	90.9	Neutrophil	9.1	1.21309	0.437551	0.767439	1.21309	1.84583	1.35352	1.84583	EP	0.437551	0.419047	0.00388133	0.410591	0.632022	0.414299	0.417037	0.421043	0.423798	0.418331	0.418965	1.21519e-05	0.410591	0.423864	0.414136	0.416541	0.42082	0.422352	20	8	0	2	0.304636	1.35613	0.165289	1.36173	4	FALSE	0
spcln4_cln006383_cc1541	847	22	3	Runx1	48.67	43.33	48,43|49,43|49,44	Runx1-TF1.Br-1	EP	95.5	DBL	4.5	1.35282	0.41922	0.76149	1.35282	1.78309	1.37335	1.78309	EP	0.41922	0.41989	8.31963e-06	0.412231	0.422121	0.414268	0.418579	0.421353	0.421847	0.41922	0.41989	8.31963e-06	0.412231	0.422121	0.414268	0.418579	0.421353	0.421847	21	3	0	1	0	1	0	1.36173	4	FALSE	0
spcln1_cln003579_cc213	847	21	6	Multiple																																											1	FALSE
spcln292_bcsplit0	847	21	12	NTC	51.92	16.75	50,16|51,15|51,16|51,17|52,15|52,16|52,17|52,19|53,16|53,17|53,18|53,19	NTC-Ms-4	Neutrophil	57.1	Macrophage Ly6c+	38.1	0.317785	0.576714	0.68871	0.317785	0.864805	0.228626	0.864805	DC	0.576714	0.603679	0.0163302	0.234826	0.787215	0.448151	0.533663	0.66228	0.682757	0.550999	0.58767	0.0180438	0.234826	0.681831	0.362395	0.533663	0.645122	0.660641	12	12	0	3	0.832408	2.29885	0.526077	1.34242	3	FALSE	1
spcln5_cln002457_cc2019	847	21	14	Men1	30.43	49	29,46|29,49|29,52|30,46|30,49|30,50|30,51|31,46|31,47|31,48|31,49|31,50|32,51|32,52	Men1-As	EP	90.5	Neutrophil	4.8	1.14937	0.429611	0.764642	1.14937	1.7444	1.31998	1.7444	EP	0.429611	0.418552	0.00291648	0.403859	0.658297	0.412505	0.416031	0.420706	0.421898	0.417575	0.418549	2.01968e-05	0.403859	0.42295	0.412489	0.415558	0.420586	0.421585	19	14	0	3	0.380506	1.46303	0.176871	1.34242	5	FALSE	0
spcln5_cln003634_cc2077	847	21	9	Cebpa	27.11	72.22	25,72|26,70|26,73|27,71|27,72|27,73|28,73|29,72|29,74	Cebpa-BR	EP	100	B	0	1.26452	0.411995	0.748366	1.26452	1.82649	1.26452	1.82649	EP	0.411995	0.418028	0.00011818	0.385476	0.422342	0.394084	0.406282	0.420109	0.420667	0.411995	0.418028	0.00011818	0.385476	0.422342	0.394084	0.406282	0.420109	0.420667	21	9	0	1	0	1	0	1.34242	5	FALSE	0
spcln1_cln000330|cln000374|cln000822_cc42	847	20	7	Cebpa	10.43	33.43	9,33|10,33|10,34|11,32|11,33|11,34|11,35	Cebpa-BR	EP	100	B	0	1.34401	0.41731	0.758019	1.34401	1.75306	1.34401	1.75306	EP	0.41731	0.42005	5.22041e-05	0.398759	0.423574	0.404258	0.417393	0.421659	0.422866	0.41731	0.42005	5.22041e-05	0.398759	0.423574	0.404258	0.417393	0.421659	0.422866	20	7	0	1	0	1	0	1.32222	1	FALSE	0
spcln1_cln006206_cc262	847	20	9	Klf1	20.56	33.78	19,34|19,36|20,33|20,34|20,35|21,33|22,32|22,33|22,34	Klf1-TF1.Br-1	EP	100	B	0	1.08702	0.406955	0.739211	1.08702	1.59674	1.08702	1.59674	EP	0.406955	0.408614	8.96335e-05	0.387374	0.420818	0.394246	0.400448	0.41368	0.417188	0.406955	0.408614	8.96335e-05	0.387374	0.420818	0.394246	0.400448	0.41368	0.417188	20	9	0	1	0	1	0	1.32222	1	FALSE	0
spcln284_bcsplit1	847	20	17	NTC	29.06	43.71	27,42|27,45|28,42|28,43|28,44|28,45|28,46|29,42|29,44|29,45|29,46|29,47|30,42|30,43|31,42|32,42|32,43	NTC-Ms-1	EP	100	B	0	1.27549	0.420537	0.763882	1.27549	1.58637	1.27549	1.58637	EP	0.420537	0.421217	8.74268e-06	0.415588	0.425007	0.416329	0.418103	0.422947	0.423995	0.420537	0.421217	8.74268e-06	0.415588	0.425007	0.416329	0.418103	0.422947	0.423995	20	17	0	1	0	1	0	1.32222	5	FALSE	0
spcln2_cln001863_cc472	847	20	8	Mbd3	39.62	24.25	38,24|38,25|39,25|40,23|40,24|40,25|41,23|41,25	Mbd3-As	Neutrophil	90	EP	5	-0.260315	0.642806	0.870824	-0.260315	0.916265	-0.314903	-0.190564	EP	0.642806	0.65437	0.00337398	0.407959	0.670622	0.637369	0.650299	0.663006	0.669252	0.655853	0.654675	0.000147895	0.620136	0.670622	0.64651	0.651839	0.663628	0.669318	18	8	0	3	0.394398	1.48349	0.185	1.32222	2	FALSE	1
spcln3_cln000722_cc737	847	20	9	Kmt2a	57.89	17.56	57,16|57,17|57,19|57,20|58,16|58,17|58,18|59,17|60,18	Kmt2a-Br	EP	65	Neutrophil	30	0.522964	0.479775	0.772884	0.522964	1.50923	0.856845	1.50923	DBL	0.479775	0.402943	0.0148097	0.389856	0.662292	0.391483	0.397342	0.642814	0.657699	0.399525	0.398812	6.5194e-05	0.389856	0.419342	0.391207	0.393161	0.402943	0.407469	13	9	0	2	0.623655	1.86573	0.432133	1.32222	3	FALSE	4
spcln4_cln001921_cc1358	847	20	7	Men1	64.71	53	63,53|63,54|64,53|65,53|65,54|66,52|67,52	Men1-As	EP	95	DBL	5	1.23178	0.416217	0.756034	1.23178	1.73473	1.2698	1.73473	EP	0.416217	0.417222	3.15223e-05	0.398873	0.421997	0.410159	0.415322	0.419867	0.420689	0.416217	0.417222	3.15223e-05	0.398873	0.421997	0.410159	0.415322	0.419867	0.420689	19	7	0	1	0	1	0	1.32222	4	FALSE	0
spcln1_cln000007|cln000015_cc0	847	19	11	Multiple																																											1	FALSE
spcln1_cln001341_cc135	847	19	12	Runx1	11.5	33.67	9,32|10,31|10,35|11,32|11,34|12,33|12,34|12,35|12,36|13,32|13,34|13,36	Runx1-TF1.Br	Macrophage Ly6c+	26.3	cDC	21.1	0.0931268	0.451463	0.451463	0.0931268	0.756509	-0.0481127	0.629625	DC	0.451463	0.518946	0.0455528	0.0255423	0.60371	0.251766	0.483293	0.557408	0.583678	0.536648	0.538689	0.00251833	0.47799	0.60371	0.486475	0.499202	0.563647	0.587685	5	12	0	6	1.69077	5.42367	0.803324	1.30103	1	TRUE	3
spcln1_cln003761_cc232	847	19	9	Hdac1	20.22	40.44	19,39|19,40|19,41|20,40|20,41|21,39|21,40|21,42|22,42	Hdac1-Br-1	EP	94.7	Neutrophil	5.3	1.05004	0.430887	0.766166	1.05004	1.52251	1.12736	1.52251	EP	0.430887	0.419141	0.00301532	0.402466	0.656911	0.415774	0.417555	0.421122	0.422559	0.41833	0.419009	2.06348e-05	0.402466	0.423311	0.415746	0.417512	0.420747	0.421909	18	9	0	2	0.206192	1.22899	0.099723	1.30103	1	FALSE	0
spcln228_cc1	847	19	11	Cebpa	16.91	46.91	15,46|15,47|15,48|16,47|16,48|17,46|17,47|18,46|19,46|19,47|19,48	Cebpa-BR	EP	100	B	0	1.39528	0.420231	0.763326	1.39528	1.75159	1.39528	1.75159	EP	0.420231	0.421115	4.72595e-06	0.417517	0.423349	0.417588	0.417946	0.422063	0.422657	0.420231	0.421115	4.72595e-06	0.417517	0.423349	0.417588	0.417946	0.422063	0.422657	19	11	0	1	0	1	0	1.30103	1	FALSE	0
spcln2_cln000666|cln000944|cln001411_cc382	847	19	9	Multiple																																											2	FALSE
spcln2_cln001056|cln001597_cc416	847	19	7	Gltscr1	37.29	17.14	35,17|36,17|37,17|38,16|38,17|38,18|39,18	Gltscr1-Br	Neutrophil	100	B	0	-0.334478	0.656008	0.878242	-0.334478	-0.10668	-0.334478	-0.10668	Neutrophil	0.656008	0.654713	0.000154772	0.62987	0.673996	0.637658	0.652176	0.665056	0.668881	0.656008	0.654713	0.000154772	0.62987	0.673996	0.637658	0.652176	0.665056	0.668881	19	7	0	1	0	1	0	1.30103	2	FALSE	1
spcln2_cln006247_cc604	847	19	9	Irf8	26.56	30.89	24,30|25,30|25,31|26,30|27,31|27,32|28,30|28,32|29,32	Irf8-TF1.Br-1	EP	89.5	DBL Aggregate	10.5	0.897406	0.406618	0.738598	0.897406	1.40655	0.962876	1.40655	EP	0.406618	0.409999	0.000137311	0.386117	0.419718	0.389641	0.398814	0.417617	0.419096	0.406618	0.409999	0.000137311	0.386117	0.419718	0.389641	0.398814	0.417617	0.419096	17	9	0	1	0	1	0	1.30103	2	FALSE	0
spcln3_cln003708_cc888	847	19	13	Irf8	56.31	28	54,28|55,26|55,27|55,29|56,25|56,27|56,29|56,30|57,26|57,29|58,29|58,30|59,29	Irf8-TF1.Br-1	EP	89.5	DBL	5.3	0.860045	0.416839	0.740684	0.860045	1.46925	0.917532	1.46925	EP	0.416839	0.41424	0.00284223	0.379921	0.621032	0.382092	0.389493	0.419771	0.420718	0.404828	0.413034	0.000260657	0.379921	0.42109	0.382023	0.38899	0.418156	0.420547	17	13	0	2	0.214559	1.23932	0.104938	1.30103	3	FALSE	0
spcln4_cln000247_cc1008	847	19	16	NTC	56.25	45.25	55,43|55,45|55,46|55,47|55,48|56,42|56,48|57,41|57,42|57,43|57,44|57,45|57,46|57,47|57,48|57,49	NTC-Ms-4	Neutrophil	73.7	Macrophage Ly6c+	15.8	-0.0705541	0.582502	0.749944	-0.0705541	0.949317	-0.0191357	0.949317	pDC	0.582502	0.577058	0.00451664	0.452185	0.663098	0.475004	0.564638	0.642037	0.65138	0.600185	0.615836	0.00313138	0.462845	0.663098	0.546715	0.570947	0.645019	0.653645	14	16	0	3	0.65467	1.92451	0.364198	1.30103	4	FALSE	1
spcln4_cln000574_cc1122	847	19	11	Phf10	67.27	52.45	65,52|65,54|66,52|66,54|67,52|67,54|68,53|69,50|69,51|69,52|69,53	Phf10-As	EP	100	B	0	1.12238	0.406543	0.738462	1.12238	1.6129	1.12238	1.6129	EP	0.406543	0.40442	0.000134945	0.388922	0.421564	0.392177	0.394599	0.41724	0.419659	0.406543	0.40442	0.000134945	0.388922	0.421564	0.392177	0.394599	0.41724	0.419659	19	11	0	1	0	1	0	1.30103	4	FALSE	0
spcln4_cln007900_cc1555	847	19	8	Hhex	65.5	57.12	64,58|65,56|65,57|65,58|66,56|66,57|66,58|67,57	Hhex-TF1.Br	EP	100	B	0	1.26409	0.421263	0.765201	1.26409	1.63646	1.26409	1.63646	EP	0.421263	0.421775	4.62204e-06	0.414405	0.423359	0.419106	0.42067	0.422499	0.423197	0.421263	0.421775	4.62204e-06	0.414405	0.423359	0.419106	0.42067	0.422499	0.423197	19	8	0	1	0	1	0	1.30103	4	FALSE	0
spcln5_cln000668_cc1849	847	19	3	Irf8	28	73	27,73|28,73|29,73	Irf8-TF1.Br	EP	94.7	DBL	5.3	1.1106	0.414332	0.75261	1.1106	1.6143	1.12782	1.6143	EP	0.414332	0.41447	6.20868e-05	0.397625	0.423313	0.405257	0.40928	0.421838	0.422801	0.414332	0.41447	6.20868e-05	0.397625	0.423313	0.405257	0.40928	0.421838	0.422801	18	3	0	1	0	1	0	1.30103	5	FALSE	0
spcln1_cln009310|cln009311_cc270	847	18	8	Multiple																																											1	FALSE
spcln2_cln001091_cc421	847	18	11	Rcor1	22.82	11.27	21,14|22,9|22,13|22,14|23,9|23,10|23,11|23,12|24,9|24,11|24,12	Rcor1-As-1	cDC	33.3	pDC	33.3	-0.00658042	0.62107	0.62107	-0.00658042	1.30804	-0.338394	0.53224	Lymphoid Progenitor	0.62107	0.62107		0.62107	0.62107	0.62107	0.62107	0.62107	0.62107										6	11	0	6	1.51276	4.53926	0.740741	1.27875	2	FALSE	3
spcln2_cln003780_cc561	847	18	9	Kmt2d	31.67	23.33	30,22|30,23|31,23|31,25|32,23|32,24|33,22|33,23|33,25	Kmt2d-As	Neutrophil	72.2	BMP	11.1	0.178379	0.603729	0.781829	0.178379	1.02234	0.243072	1.02234	Neutrophil	0.603729	0.604099	0.000924389	0.557206	0.656927	0.565878	0.581346	0.622667	0.642319	0.606611	0.607071	0.000997809	0.557206	0.656927	0.563482	0.581508	0.622895	0.645832	13	9	0	4	0.883876	2.42026	0.450617	1.27875	2	FALSE	1
spcln4_cln000007|cln000015_cc915	847	18	10	Multiple																																											4	FALSE
spcln4_cln000643|cln000645_cc1181	847	18	12	Multiple																																											4	FALSE
spcln4_cln001791|cln002644_cc1349	847	18	8	Ebf1	63.12	62.88	62,62|62,63|62,64|63,63|63,64|64,62|64,63|65,62	Ebf1-B.Br	Neutrophil	88.9	DBL	5.6	-0.273628	0.633574	0.838934	-0.273628	0.681916	-0.236215	0.681916	Neutrophil	0.633574	0.652136	0.0024836	0.465395	0.663525	0.594283	0.635095	0.661299	0.66274	0.644085	0.655825	0.000645716	0.571646	0.663525	0.614744	0.637838	0.661472	0.66282	16	8	0	2	0.223718	1.25072	0.110727	1.27875	4	FALSE	1
spcln4_cln002684|cln004192|cln004402_cc1411	847	18	12	Multiple																																											4	FALSE
spcln1_cln000197|cln000218_cc29	847	17	7	Multiple																																											1	FALSE
spcln1_cln000549|cln002067_cc84	847	17	4	Multiple																																											1	FALSE
spcln1_cln001598|cln003579_cc148	847	17	8	Multiple																																											1	FALSE
spcln2_cln000030_cc289	847	17	12	Multiple																																											2	FALSE
spcln317_bcsplit0	847	17	4	Rcor1	38.75	24.75	38,24|38,25|39,25|40,25	Rcor1-As	Macrophage Ly6c+	100	B	0	-0.395366	0.530826	0.530826	-0.395366	0.650676	-0.395366	0.650676	Macrophage Ly6c+	0.530826	0.520999	0.0012289	0.475502	0.611876	0.499444	0.503531	0.555702	0.569683	0.530826	0.520999	0.0012289	0.475502	0.611876	0.499444	0.503531	0.555702	0.569683	17	4	0	1	0	1	0	1.25527	2	FALSE	2
spcln4_cln000049_cc939	847	17	10	Rcor1	59.7	44.9	56,45|57,46|58,46|59,45|60,44|60,45|61,44|61,45|62,45|63,44	Rcor1-As	Macrophage Ly6c+	88.2	DBL	11.8	-0.331327	0.522669	0.522669	-0.331327	0.614795	-0.329355	0.614795	Macrophage Ly6c+	0.522669	0.535306	0.0026766	0.415583	0.619888	0.462139	0.499109	0.547778	0.577401	0.522669	0.535306	0.0026766	0.415583	0.619888	0.462139	0.499109	0.547778	0.577401	15	10	0	1	0	1	0	1.25527	4	FALSE	2
spcln4_cln000202_cc991	847	17	12	Mbd3	57.5	44.08	55,45|56,45|57,42|57,43|57,44|57,45|58,43|58,44|58,45|59,43|59,44|59,46	Mbd3-As	cDC	52.9	DC	29.4	-0.346876	0.626957	0.777615	-0.346876	0.656755	-0.416112	0.13652	Macrophage Ly6c+	0.626957	0.665791	0.00483321	0.546694	0.668385	0.570514	0.606243	0.667088	0.667866										9	12	0	4	1.11507	3.04977	0.615917	1.25527	4	FALSE	3
spcln4_cln003648_cc1473	847	17	3	Irf8	51	58	51,57|51,58|51,59	Irf8-TF1.Br-1	EP	47.1	Neutrophil	41.2	0.67141	0.516398	0.796538	0.67141	1.59776	1.28881	1.59776	EP	0.516398	0.420122	0.0137163	0.405121	0.669939	0.407407	0.412853	0.63791	0.663346	0.41294	0.412853	3.44877e-05	0.405121	0.420122	0.405149	0.409371	0.417641	0.41981	8	3	0	2	0.690923	1.99556	0.497778	1.25527	4	FALSE	4
spcln5_cln000053|cln000149_cc1602	847	17	6	Pax5	31	49.5	30,49|30,50|31,49|31,50|32,49|32,50	Pax5-TF1.Br	EP	100	B	0	1.17424	0.408745	0.742462	1.17424	1.81073	1.17424	1.81073	EP	0.408745	0.412785	0.000142668	0.386192	0.419946	0.3909	0.39924	0.418577	0.419276	0.408745	0.412785	0.000142668	0.386192	0.419946	0.3909	0.39924	0.418577	0.419276	17	6	0	1	0	1	0	1.25527	5	FALSE	0
spcln5_cln001341_cc1943	847	17	12	Runx1	35.83	50.92	34,52|35,49|35,50|35,51|35,53|36,49|36,50|36,51|37,50|37,51|37,52|37,53	Runx1-TF1.Br	Macrophage Ly6c+	29.4	cDC	23.5	0.149925	0.431381	0.431381	0.149925	0.757515	0.149331	0.439154	DC	0.431381	0.494072	0.0417432	0.025078	0.566013	0.236571	0.455342	0.548484	0.563502	0.512642	0.510964	0.00265422	0.448063	0.566013	0.45971	0.47718	0.560991	0.564004	5	12	0	6	1.63043	5.10608	0.78125	1.25527	5	TRUE	3
spcln5_cln001777|cln003576|cln003711_cc1971	847	17	10	Multiple																																											5	FALSE
spcln1_cln001368_cc140	847	16	5	Kmt2a	20.6	31.4	20,30|20,31|20,32|21,32|22,32	Kmt2a-Br	EP	100	B	0	1.35616	0.417505	0.758373	1.35616	1.64517	1.35616	1.64517	EP	0.417505	0.417757	2.18695e-05	0.403461	0.422335	0.414225	0.415694	0.421017	0.421812	0.417505	0.417757	2.18695e-05	0.403461	0.422335	0.414225	0.415694	0.421017	0.421812	16	5	0	1	0	1	0	1.23045	1	FALSE	0
spcln1_cln003718_cc225	847	16	8	Cited4	19	44.62	18,43|18,44|18,46|19,43|19,44|19,46|20,45|21,46	Cited4-TF1.Br	EP	100	B	0	1.21556	0.414177	0.75233	1.21556	1.68352	1.21556	1.68352	EP	0.414177	0.416151	3.08074e-05	0.401492	0.420087	0.406351	0.411362	0.418255	0.419333	0.414177	0.416151	3.08074e-05	0.401492	0.420087	0.406351	0.411362	0.418255	0.419333	16	8	0	1	0	1	0	1.23045	1	FALSE	0
spcln282_bcsplit1_cc0	847	16	13	Mbd3	63.46	46.54	60,46|60,47|61,45|61,47|62,46|62,47|63,47|64,46|65,47|66,46|67,46|67,47|67,48	Mbd3-As	cDC	56.2	Neutrophil	18.8	-0.202097	0.578206	0.824652	-0.202097	1.37705	-0.467461	-0.272082	EP	0.578206	0.611912	0.0121665	0.423457	0.665541	0.469068	0.537485	0.652633	0.660378										9	13	0	4	0.991139	2.6943	0.530612	1.23045	4	FALSE	3
spcln2_cln000950|cln000973_cc411	847	16	9	Rcor1	39.78	25.11	38,25|38,26|39,25|40,24|40,25|40,26|41,24|41,25|41,26	Rcor1-As	DC	56.2	cDC	37.5	-0.392451			-0.392451	0.713567	-0.46544	-0.327883	cDC																			9	9	0	2	0.673012	1.96013	0.48	1.23045	2	FALSE	3
spcln3_cln000918_cc752	847	16	4	NTC	58	15.5	57,15|58,15|58,16|59,16	NTC-Ms-4	Neutrophil	81.2	Macrophage Ly6c+	12.5	0.246168	0.595299	0.767805	0.246168	0.933154	0.231541	0.933154	Macrophage Ly6c+	0.595299	0.595031	0.00209857	0.481716	0.710845	0.575611	0.581305	0.604421	0.624728	0.587558	0.595031	0.0012523	0.481716	0.630626	0.574492	0.582234	0.599278	0.614618	13	4	0	2	0.392674	1.48094	0.231111	1.23045	3	FALSE	1
spcln3_cln001311_cc778	847	16	13	Irf8	73.54	25	71,27|72,22|72,26|73,23|73,25|73,27|74,23|74,24|74,25|74,26|75,25|75,26|76,26	Irf8-TF1.Br	EP	100	B	0	1.13145	0.406215	0.737866	1.13145	1.54796	1.13145	1.54796	EP	0.406215	0.408156	0.000155152	0.386841	0.421415	0.390319	0.39592	0.417038	0.418939	0.406215	0.408156	0.000155152	0.386841	0.421415	0.390319	0.39592	0.417038	0.418939	16	13	0	1	0	1	0	1.23045	3	FALSE	0
spcln3_cln001978_cc822	847	16	15	Multiple																																											3	FALSE
spcln4_cln002479_cc1390	847	16	6	Multiple																																											4	FALSE
spcln4_cln003118|cln003223|cln003675_cc1437	847	16	12	Multiple																																											4	FALSE
spcln5_cln000035_cc1593	847	16	9	Phf10	36.67	56.89	35,57|35,58|36,56|36,57|37,56|37,57|38,56|38,57|38,58	Phf10-As-1	Neutrophil	68.8	Macrophage Ly6c+	25	0.219685	0.610644	0.761295	0.219685	0.803179	0.214655	0.803179	Macrophage Ly6c+	0.610644	0.602674	0.00120032	0.572501	0.662263	0.575192	0.579027	0.64032	0.658988	0.606413	0.58618	0.00110919	0.572501	0.659667	0.575799	0.579027	0.629049	0.657969	11	9	0	2	0.579915	1.78589	0.391111	1.23045	5	FALSE	1
spcln5_cln000639|cln001868_cc1821	847	16	12	Tal1	32.25	57.5	30,57|31,55|31,56|31,59|32,57|32,58|32,59|33,56|33,59|34,57|34,58|34,59	Tal1-TF1.Br-1	EP	93.8	DBL	6.2	1.13718	0.414736	0.753343	1.13718	1.51273	1.17813	1.51273	EP	0.414736	0.417577	7.15576e-05	0.392091	0.422445	0.404634	0.41279	0.420242	0.420687	0.414736	0.417577	7.15576e-05	0.392091	0.422445	0.404634	0.41279	0.420242	0.420687	15	12	0	1	0	1	0	1.23045	5	FALSE	0
spcln5_cln001604|cln003652_cc1963	847	16	11	Multiple																																											5	TRUE
spcln5_cln001951|cln002084_cc1999	847	16	9	Smarcd2	39.67	53.22	37,54|38,54|39,53|40,52|40,53|40,54|41,52|41,53|41,54	Smarcd2-As	EP	93.8	Neutrophil	6.2	1.34714	0.4306	0.763966	1.34714	1.81168	1.44541	1.81168	EP	0.4306	0.42053	0.00228642	0.412654	0.609416	0.413687	0.414737	0.421254	0.423008	0.418679	0.4205	1.35393e-05	0.412654	0.423496	0.413664	0.414641	0.421109	0.422031	15	9	0	2	0.233792	1.26338	0.117188	1.23045	5	FALSE	0
spcln1_cln006174|cln006202_cc250	847	15	8	Chd4	14.12	34.12	12,34|13,34|14,33|14,34|14,36|15,34|15,35|16,33	Chd4-As-1	EP	86.7	DBL	6.7	0.84962	0.401552	0.729396	0.84962	1.46152	0.915302	1.46152	DBL	0.401552	0.403407	0.000161518	0.378748	0.418061	0.386108	0.389579	0.410807	0.416793	0.401552	0.403407	0.000161518	0.378748	0.418061	0.386108	0.389579	0.410807	0.416793	13	8	0	2	0.257319	1.29346	0.132653	1.20412	1	FALSE	0
spcln1_cln007423_cc268	847	15	9	Cebpa	13.56	53.44	13,51|13,54|13,55|13,56|14,51|14,52|14,53|14,54|14,55	Cebpa-BR	EP	100	B	0	0.787227	0.395669	0.718709	0.787227	1.13053	0.787227	1.13053	EP	0.395669	0.392108	0.000126646	0.383213	0.416724	0.384635	0.387464	0.401285	0.413936	0.395669	0.392108	0.000126646	0.383213	0.416724	0.384635	0.387464	0.401285	0.413936	15	9	0	1	0	1	0	1.20412	1	FALSE	0
spcln2_cln000434_cc355	847	15	11	Hoxa7	40.55	29.91	39,29|40,27|40,30|40,31|40,32|41,28|41,29|41,30|41,31|41,32|42,30	Hoxa7-TF1.Br	EP	93.3	DBL	6.7	1.19595	0.41342	0.750955	1.19595	1.69048	1.22494	1.69048	EP	0.41342	0.417023	8.34115e-05	0.396653	0.422812	0.40034	0.405361	0.420264	0.422364	0.41342	0.417023	8.34115e-05	0.396653	0.422812	0.40034	0.405361	0.420264	0.422364	14	11	0	1	0	1	0	1.20412	2	FALSE	0
spcln2_cln000475_cc363	847	15	13	Mbd3	30.77	18.31	29,17|29,21|30,17|30,18|30,21|31,16|31,17|31,19|31,21|32,15|32,17|32,19|32,20	Mbd3-As	EP	53.3	Neutrophil	26.7	0.497267	0.488206	0.784583	0.497267	1.66279	1.22753	1.66279	EP	0.488206	0.418185	0.0131483	0.389211	0.663501	0.408048	0.411178	0.614271	0.655433	0.411331	0.413	0.000104138	0.389211	0.422269	0.402335	0.408617	0.417877	0.41984	8	13	0	3	0.9557	2.60049	0.571429	1.20412	2	FALSE	4
spcln2_cln003578_cc531	847	15	11	Hdac1	29.27	17.09	27,17|27,19|28,16|28,18|29,16|29,17|30,16|31,15|31,17|31,18|31,19	Hdac1-Br	Neutrophil	66.7	Macrophage Ly6c+	26.7	0.380552	0.556835	0.702865	0.380552	0.904264	0.452079	0.875968	EP	0.556835	0.559737	0.00543029	0.354969	0.679704	0.493088	0.545057	0.591636	0.6225	0.561044	0.555778	0.00158387	0.478555	0.626034	0.532783	0.551383	0.573315	0.609754	10	11	0	3	0.803315	2.23293	0.48	1.20412	2	FALSE	1
spcln3_cln000030|cln000031_cc630	847	15	6	Multiple																																											3	FALSE
spcln3_cln000944|cln001411_cc759	847	15	13	Multiple																																											3	FALSE
spcln4_cln000422_cc1053	847	15	7	Multiple																																											4	FALSE
spcln4_cln001337_cc1296	847	15	8	Brd9	57.12	48.88	55,49|56,48|57,48|57,49|57,50|58,48|58,50|59,49	Brd9-As	EP	86.7	Neutrophil	13.3	1.19697	0.438831	0.759794	1.19697	1.74569	1.36386	1.74569	EP	0.438831	0.418295	0.00412609	0.40194	0.647044	0.410313	0.416518	0.419695	0.483837	0.416201	0.417908	3.03301e-05	0.40194	0.422389	0.409428	0.416029	0.419383	0.419864	13	8	0	2	0.392674	1.48094	0.231111	1.20412	4	FALSE	0
spcln4_cln001358|cln003845_cc1304	847	15	9	Cited4	51.56	52.89	50,51|50,54|51,52|51,53|52,52|52,53|52,55|53,52|53,54	Cited4-TF1.Br	EP	93.3	DBL Aggregate	6.7	0.716878	0.393227	0.714274	0.716878	1.27668	0.716043	1.27668	DBL Aggregate	0.393227	0.392688	0.000111829	0.381335	0.41558	0.382003	0.385455	0.395745	0.408715	0.393227	0.392688	0.000111829	0.381335	0.41558	0.382003	0.385455	0.395745	0.408715	14	9	0	1	0	1	0	1.20412	4	FALSE	0
spcln4_cln002684|cln004192|cln004402_cc1418	847	15	7	Multiple																																											4	FALSE
spcln5_cln000007|cln000015_cc1570	847	15	8	Multiple																																											5	FALSE
spcln5_cln000332_cc1684	847	15	6	Cited4	45.67	55.83	45,54|45,55|46,55|46,56|46,57|46,58	Cited4-TF1.Br	EP	93.3	DBL	6.7	0.972781	0.403811	0.7335	0.972781	1.27029	0.980647	1.27029	EP	0.403811	0.406496	0.000110147	0.379961	0.416413	0.390713	0.39888	0.411291	0.414498	0.403811	0.406496	0.000110147	0.379961	0.416413	0.390713	0.39888	0.411291	0.414498	14	6	0	1	0	1	0	1.20412	5	FALSE	0
spcln5_cln000607_cc1799	847	15	8	NTC	30	60.25	29,59|29,61|29,62|30,60|30,63|31,58|31,59|31,60	NTC-Ms-3	Neutrophil	46.7	EP	26.7	0.29295	0.523657	0.760744	0.29295	0.695661	0.194989	0.695661	cDC	0.523657	0.598854	0.0212403	0.303297	0.672347	0.334765	0.36824	0.632377	0.653755	0.626526	0.621007	0.000962692	0.587655	0.672347	0.594374	0.603587	0.648751	0.661192	7	8	0	4	1.21056	3.35536	0.666667	1.20412	5	FALSE	4
spcln5_cln000668_cc1852	847	15	10	Irf8	26	53.3	25,52|25,53|25,54|25,55|26,52|26,53|27,52|27,53|27,54|27,55	Irf8-TF1.Br	EP	100	B	0	1.13233	0.412079	0.748517	1.13233	1.71481	1.13233	1.71481	EP	0.412079	0.415415	0.00011885	0.388466	0.42233	0.39499	0.408376	0.419878	0.421567	0.412079	0.415415	0.00011885	0.388466	0.42233	0.39499	0.408376	0.419878	0.421567	15	10	0	1	0	1	0	1.20412	5	FALSE	0
spcln5_cln003369_cc2053	847	15	8	Cited2	36.75	64.62	35,64|35,66|36,64|36,65|37,65|38,64|38,65|39,64	Cited2-TF1.Br	Macrophage Ly6c+	46.7	DC	26.7	0.000611004	0.488376	0.488376	0.000611004	0.535296	-0.0729599	0.307693	DC	0.488376	0.52859	0.0333537	0.0752441	0.644082	0.343127	0.460374	0.605092	0.618048	0.547395	0.583928	0.00640252	0.457933	0.644082	0.459886	0.46722	0.605692	0.621767	7	8	0	5	1.27002	3.56092	0.653061	1.20412	5	TRUE	2
spcln323	847	14	9	Runx1	58	32.78	57,32|57,33|58,31|58,32|58,33|58,34|58,35|59,32|59,33	Runx1-TF1.Br-1	Neutrophil	64.3	Macrophage Ly6c+	14.3	0.280806	0.437139	0.551175	0.280806	0.709098	0.442244	0.709098	Neutrophil	0.437139	0.492315	0.0295268	0.171626	0.623077	0.224771	0.292219	0.583232	0.617719	0.448828	0.579388	0.0334592	0.171626	0.623077	0.237092	0.305139	0.589106	0.621334	9	9	0	5	1.12753	3.08803	0.55102	1.17609	3	FALSE	1
spcln3_cln000659_cc715	847	14	6	Klf1	62.5	41.17	61,41|62,40|62,42|63,41|63,42|64,41	Klf1-TF1.Br-1	EP	92.9	DBL	7.1	1.08976	0.419399	0.761814	1.08976	1.69807	1.19197	1.69807	EP	0.419399	0.420072	8.3385e-06	0.413525	0.422678	0.416164	0.417158	0.421524	0.422539	0.419399	0.420072	8.3385e-06	0.413525	0.422678	0.416164	0.417158	0.421524	0.422539	13	6	0	1	0	1	0	1.17609	3	FALSE	0
spcln3_cln006171_cc908	847	14	10	Mbd3	67.8	40.2	66,39|67,38|67,39|67,41|67,42|68,40|68,41|69,40|69,41|70,41	Mbd3-As	EP	85.7	Neutrophil	14.3	0.944295	0.455438	0.78219	0.944295	1.64976	1.16122	1.64976	EP	0.455438	0.422363	0.00758848	0.417825	0.672393	0.418939	0.420611	0.422584	0.581149	0.421222	0.422155	2.8909e-06	0.417825	0.422628	0.41874	0.420235	0.422528	0.422593	12	10	0	2	0.410116	1.50699	0.244898	1.17609	3	FALSE	0
spcln4_cln000007|cln000015_cc916	847	14	7	Multiple																																											4	FALSE
spcln4_cln000247_cc1009	847	14	7	NTC	57.86	52.86	57,52|57,53|57,54|58,52|58,54|59,52|59,53	NTC-Ms-4	Neutrophil	71.4	Macrophage Ly6c+	28.6	0.303167	0.60588	0.754546	0.303167	0.992097	0.264542	0.992097	Macrophage Ly6c+	0.60588	0.613304	0.0024972	0.489844	0.668745	0.546723	0.58839	0.63894	0.656452	0.614381	0.613304	0.00106615	0.55304	0.65907	0.582306	0.596899	0.638816	0.651217	10	7	0	2	0.59827	1.81897	0.408163	1.17609	4	FALSE	1
spcln4_cln000643_cc1177	847	14	10	Multiple																																											4	FALSE
spcln4_cln000643|cln000645_cc1183	847	14	6	Multiple																																											4	FALSE
spcln5_cln000232|cln001435|cln001949_cc1663	847	14	10	Multiple																																											5	TRUE
spcln5_cln001264_cc1920	847	14	6	Gltscr1	41.5	61.83	40,63|40,64|41,62|42,61|43,60|43,61	Gltscr1-Br	EP	100	B	0	1.44289	0.420813	0.764383	1.44289	1.78377	1.44289	1.78377	EP	0.420813	0.420795	5.08086e-06	0.416899	0.425174	0.418244	0.419211	0.422395	0.422828	0.420813	0.420795	5.08086e-06	0.416899	0.425174	0.418244	0.419211	0.422395	0.422828	14	6	0	1	0	1	0	1.17609	5	FALSE	0
spcln5_cln003698_cc2100	847	14	7	Atf7ip	32	67	31,66|31,67|32,66|32,67|32,68|33,67|33,68	Atf7ip-Br	Macrophage Ly6c+	78.6	DBL	7.1	0.0336049	0.571738	0.590684	0.0336049	0.730534	0.111573	0.730534	DBL	0.571738	0.560053	0.00306132	0.500962	0.671122	0.514659	0.531777	0.619536	0.638879	0.562703	0.556877	0.00228994	0.500962	0.639799	0.514568	0.526343	0.594013	0.630594	11	7	0	3	0.535961	1.70909	0.272189	1.17609	5	FALSE	2
spcln5_cln003718_cc2110	847	14	8	Cited4	41.25	58.88	40,58|40,59|40,60|41,58|41,59|42,58|43,59|43,60	Cited4-TF1.Br	EP	92.9	DBL Aggregate	7.1	1.22445	0.418182	0.759604	1.22445	1.67085	1.29386	1.67085	EP	0.418182	0.420216	2.8267e-05	0.402118	0.422421	0.415351	0.417727	0.421121	0.42175	0.418182	0.420216	2.8267e-05	0.402118	0.422421	0.415351	0.417727	0.421121	0.42175	13	8	0	1	0	1	0	1.17609	5	FALSE	0
spcln5_cln009310|cln009311_cc2212	847	14	10	Multiple																																											5	FALSE
spcln1_cln000232|cln001435|cln001949_cc36	847	13	7	Multiple																																											1	TRUE
spcln1_cln001991_cc183	847	13	3	Wdr82	10.33	42.33	10,42|10,43|11,42	Wdr82-Br	EP	100	B	0	1.27263	0.413135	0.750437	1.27263	1.63323	1.27263	1.63323	EP	0.413135	0.414329	2.50295e-05	0.403145	0.419554	0.405371	0.411585	0.416367	0.417481	0.413135	0.414329	2.50295e-05	0.403145	0.419554	0.405371	0.411585	0.416367	0.417481	13	3	0	1	0	1	0	1.14613	1	FALSE	0
spcln1_cln006171_cc248	847	13	3	Mbd3	14	32	13,32|14,32|15,32	Mbd3-As	EP	92.3	DBL	7.7	1.1488	0.419991	0.762889	1.1488	1.55605	1.16575	1.55605	EP	0.419991	0.420666	7.91847e-06	0.41402	0.423256	0.416788	0.418534	0.422099	0.422396	0.419991	0.420666	7.91847e-06	0.41402	0.423256	0.416788	0.418534	0.422099	0.422396	12	3	0	1	0	1	0	1.14613	1	FALSE	0
spcln299_cc1	847	13	9	NTC	43.44	25	42,24|42,25|42,26|43,25|44,24|44,25|44,26|45,24|45,26	NTC-Ms-7	EP	100	B	0	1.36773	0.418269	0.759761	1.36773	1.74678	1.36773	1.74678	EP	0.418269	0.419185	1.45518e-05	0.410958	0.424712	0.412696	0.416258	0.420347	0.421182	0.418269	0.419185	1.45518e-05	0.410958	0.424712	0.412696	0.416258	0.420347	0.421182	13	9	0	1	0	1	0	1.14613	2	FALSE	0
spcln317_bcsplit1	847	13	8	Rcor1	40	25.5	39,25|39,27|40,24|40,25|40,26|40,28|41,24|41,25	Rcor1-As	Macrophage Ly6c+	100	B	0	-0.158207	0.539078	0.539078	-0.158207	0.834801	-0.158207	0.834801	Macrophage Ly6c+	0.539078	0.543192	0.00141172	0.45709	0.588994	0.490257	0.538286	0.556097	0.585429	0.539078	0.543192	0.00141172	0.45709	0.588994	0.490257	0.538286	0.556097	0.585429	13	8	0	1	0	1	0	1.14613	2	FALSE	2
spcln329_bcsplit1_cc0	847	13	7	Tal1	20.57	33	19,34|20,32|20,33|20,34|21,33|22,32|22,33	Tal1-TF1.Br-1	Macrophage Ly6c+	46.2	DC	30.8	0.214284	0.482343	0.482343	0.214284	0.712108	0.3719	0.712108	DC	0.482343	0.522908	0.0135725	0.251254	0.560634	0.36719	0.492404	0.546317	0.556932	0.482343	0.522908	0.0135725	0.251254	0.560634	0.36719	0.492404	0.546317	0.556932	6	7	0	5	1.31143	3.71148	0.674556	1.14613	1	FALSE	3
spcln3_cln001978|cln003575_cc832	847	13	11	Multiple																																											3	FALSE
spcln3_cln001978|cln003575_cc833	847	13	6	Multiple																																											3	FALSE
spcln4_cln000052_cc941	847	13	4	Cebpe	58.5	57.5	58,57|58,58|59,57|59,58	Cebpe-TF1.Br-1	Macrophage Ly6c+	53.8	DC	15.4	0.431871	0.542377	0.585567	0.431871	1.19793	0.347975	0.612459	EP	0.542377	0.566545	0.00481805	0.423197	0.601969	0.439878	0.523621	0.589083	0.599686	0.559403	0.583873	0.00291554	0.447028	0.601969	0.508302	0.549185	0.592291	0.600012	7	4	0	5	1.30388	3.68354	0.650888	1.14613	4	FALSE	2
spcln4_cln000054|cln000112_cc945	847	13	10	Multiple																																											4	FALSE
spcln4_cln000101|cln000114_cc960	847	13	6	Multiple																																											4	FALSE
spcln4_cln000505_cc1083	847	13	10	Mbd3	50.4	49.8	49,47|49,50|50,48|50,50|51,48|51,49|51,50|51,51|51,52|51,53	Mbd3-As	EP	61.5	Neutrophil	23.1	0.930988	0.457429	0.755193	0.930988	1.49437	1.16214	1.49437	DBL	0.457429	0.417061	0.00725472	0.387358	0.656999	0.4072	0.412807	0.476883	0.549969	0.411061	0.415959	0.000105837	0.387358	0.417505	0.401248	0.409513	0.417086	0.417265	8	10	0	2	0.585953	1.7967	0.396694	1.14613	4	FALSE	4
spcln4_cln000554_cc1105	847	13	9	NTC	64.78	52.56	62,51|63,52|63,53|64,54|65,53|66,52|66,53|67,52|67,53	NTC-Ms-6	EP	84.6	DBL	7.7	0.946768	0.417414	0.736277	0.946768	1.64243	1.08865	1.64243	EP	0.417414	0.404682	0.00186107	0.388727	0.550946	0.394263	0.400476	0.415679	0.421746	0.405274	0.402027	0.000101986	0.388727	0.422401	0.393631	0.400299	0.412796	0.415847	11	9	0	2	0.286836	1.33221	0.152778	1.14613	4	FALSE	0
spcln4_cln000597_cc1132	847	13	6	Mbd3	58	58	57,58|57,59|58,57|58,58|59,57|59,59	Mbd3-As	EP	100	B	0	1.3458	0.420721	0.764215	1.3458	1.88868	1.3458	1.88868	EP	0.420721	0.420996	4.65222e-06	0.416346	0.423724	0.417135	0.420503	0.421959	0.422523	0.420721	0.420996	4.65222e-06	0.416346	0.423724	0.417135	0.420503	0.421959	0.422523	13	6	0	1	0	1	0	1.14613	4	FALSE	0
spcln4_cln001180_cc1257	847	13	10	Cebpb	50.8	42.1	48,42|49,41|49,43|50,41|51,42|51,43|52,41|52,43|53,42|53,43	Cebpb-TF1.Br-1	cDC	76.9	DBL	7.7	-0.567674	0.656336	0.878681	-0.567674	-0.166326	-0.621959	-0.371078	DBL	0.656336	0.656336		0.656336	0.656336	0.656336	0.656336	0.656336	0.656336										10	10	0	3	0.566086	1.76136	0.291667	1.14613	4	FALSE	3
spcln4_cln001380_cc1309	847	13	5	Tal1	68	50.8	67,51|67,52|68,50|69,50|69,51	Tal1-TF1.Br-1	EP	100	B	0	1.23444	0.412473	0.749233	1.23444	1.80663	1.23444	1.80663	EP	0.412473	0.415461	0.000129466	0.387564	0.422699	0.39283	0.412106	0.41932	0.419795	0.412473	0.415461	0.000129466	0.387564	0.422699	0.39283	0.412106	0.41932	0.419795	13	5	0	1	0	1	0	1.14613	4	FALSE	0
spcln4_cln003118|cln003223|cln003675_cc1438	847	13	9	Multiple																																											4	FALSE
spcln4_cln006378_cc1540	847	13	5	Cbx3	63.6	62.8	63,62|63,63|64,62|64,63|64,64	Cbx3-B-1	EP	92.3	DBL	7.7	1.40623	0.416709	0.756928	1.40623	1.74209	1.39979	1.74209	DBL	0.416709	0.417047	1.04815e-05	0.412027	0.421842	0.412289	0.414785	0.418008	0.42132	0.416709	0.417047	1.04815e-05	0.412027	0.421842	0.412289	0.414785	0.418008	0.42132	12	5	0	1	0	1	0	1.14613	4	FALSE	0
spcln5_cln000066_cc1611	847	13	9	Cebpb	29.78	46.44	29,44|29,46|29,47|29,48|30,45|30,46|30,47|31,47|31,48	Cebpb-TF1.Br-1	EP	69.2	Neutrophil	23.1	0.72213	0.465408	0.769563	0.72213	1.43447	1.14196	1.43447	EP	0.465408	0.41716	0.0106847	0.385241	0.655542	0.390892	0.411383	0.467102	0.638341	0.408895	0.41323	0.000166931	0.385241	0.42029	0.388298	0.407358	0.417653	0.418321	9	9	0	3	0.790268	2.20399	0.461538	1.14613	5	FALSE	4
spcln5_cln000170_cc1645	847	13	12	Mbd3	41.08	61	40,60|40,61|40,62|40,63|41,58|41,59|41,61|41,62|41,64|42,61|43,60|43,61	Mbd3-As	Neutrophil	69.2	EP	15.4	0.219192	0.518555	0.721455	0.219192	1.08765	0.0654359	0.678954	EP	0.518555	0.584021	0.0228712	0.212939	0.676219	0.333776	0.418839	0.648971	0.661108	0.574956	0.590836	0.0136422	0.324752	0.676219	0.423205	0.583361	0.660735	0.664163	9	12	0	4	0.937156	2.55271	0.485207	1.14613	5	FALSE	1
spcln5_cln000549|cln002067_cc1760	847	13	9	Multiple																																											5	FALSE
spcln5_cln001245_cc1919	847	13	6	Multiple																																											5	FALSE
spcln5_cln001951|cln002084_cc1998	847	13	9	Multiple																																											5	FALSE
spcln5_cln002995_cc2042	847	13	6	Cited2	31.33	40.17	29,40|30,40|31,40|32,40|33,40|33,41	Cited2-TF1.Br	EP	100	B	0	1.35669	0.419961	0.762836	1.35669	1.60992	1.35669	1.60992	EP	0.419961	0.421168	8.53989e-06	0.413675	0.423082	0.415861	0.419787	0.42163	0.422481	0.419961	0.421168	8.53989e-06	0.413675	0.423082	0.415861	0.419787	0.42163	0.422481	13	6	0	1	0	1	0	1.14613	5	FALSE	0
spcln5_cln006193_cc2173	847	13	9	Rcor1	31.11	53.56	30,54|31,51|31,52|31,53|31,54|31,55|31,56|32,52|32,55	Rcor1-As	Macrophage Ly6c+	46.2	pDC	30.8	0.255629	0.382136	0.382136	0.255629	0.861884	0.349246	0.612942	MEP	0.382136	0.452149	0.0267373	0.0803441	0.527849	0.16527	0.304998	0.488879	0.527591	0.462513	0.473547	0.00495001	0.339442	0.527849	0.386329	0.442682	0.514613	0.527665	6	9	0	3	1.0114	2.74946	0.611111	1.14613	5	FALSE	2
spcln1_cln003369_cc195	847	12	2	Cited2	19	38.5	19,38|19,39	Cited2-TF1.Br	Macrophage Ly6c+	58.3	DC	16.7	0.356847	0.56879	0.600949	0.356847	0.89181	0.612881	0.89181	Macrophage Ly6c+	0.56879	0.599913	0.0119693	0.282532	0.637181	0.513978	0.582553	0.621101	0.626626	0.609248	0.610844	0.000390664	0.582553	0.637181	0.586515	0.594534	0.622544	0.629264	7	2	0	3	0.907535	2.47821	0.528926	1.11394	1	FALSE	2
spcln284_bcsplit2_cc0	847	12	8	NTC	28.5	43.88	28,42|28,43|28,44|28,45|28,46|29,42|29,47|30,42	NTC-Ms-1	EP	100	B	0	1.41253	0.419863	0.762657	1.41253	1.68411	1.41253	1.68411	EP	0.419863	0.420282	6.87477e-06	0.414505	0.423777	0.416846	0.418936	0.421419	0.422711	0.419863	0.420282	6.87477e-06	0.414505	0.423777	0.416846	0.418936	0.421419	0.422711	12	8	0	1	0	1	0	1.11394	5	FALSE	0
spcln2_cln000247_cc339	847	12	3	NTC	31.67	9.67	31,10|32,9|32,10	NTC-Ms-4	Neutrophil	83.3	DC	8.3	-0.32364	0.634016	0.834041	-0.32364	0.404978	-0.275595	0.404978	Neutrophil	0.634016	0.651269	0.00370684	0.479221	0.688803	0.5722	0.630357	0.674942	0.679836	0.649496	0.652851	0.00119006	0.5722	0.688803	0.619812	0.636163	0.676658	0.680733	10	3	0	3	0.566086	1.76136	0.291667	1.11394	2	FALSE	1
spcln2_cln000666|cln000944|cln001411_cc381	847	12	7	Multiple																																											2	FALSE
spcln2_cln000943_cc410	847	12	9	Cbx3	30.44	17.67	28,16|29,16|30,16|30,19|31,17|31,18|31,19|32,18|32,20	Cbx3-B	Macrophage Ly6c+	41.7	Neutrophil	25	0.347505	0.362284	0.400151	0.347505	0.823837	0.454973	0.524082	Neutrophil	0.362284	0.479218	0.0520803	0.0200305	0.596476	0.0359484	0.149538	0.510836	0.561462	0.531593	0.522243	0.00225584	0.479218	0.596476	0.486957	0.498565	0.561462	0.58247	5	9	0	5	1.42413	4.15424	0.722222	1.11394	2	TRUE	3
spcln2_cln002638_cc513	847	12	6	Hdac1	30.17	31.5	29,31|29,32|30,31|30,32|31,32|32,31	Hdac1-Br-1	Neutrophil	75	EP	16.7	0.0266853	0.595058	0.833061	0.0266853	1.18937	-0.264002	-0.0837377	EP	0.595058	0.630728	0.00792686	0.418873	0.667325	0.419746	0.609307	0.636777	0.666495	0.634113	0.630815	0.000470709	0.601471	0.667325	0.614008	0.619485	0.639015	0.666661	9	6	0	2	0.474139	1.60663	0.297521	1.11394	2	FALSE	1
spcln303_bcsplit1_cc2	847	12	7	NTC	31.86	57.43	30,57|31,57|31,58|32,59|33,56|33,57|33,58	NTC-Ms-7	EP	91.7	DBL	8.3	1.27157	0.4152	0.754187	1.27157	1.50755	1.29955	1.50755	EP	0.4152	0.416157	2.13634e-05	0.40791	0.420854	0.409035	0.411322	0.41894	0.4204	0.4152	0.416157	2.13634e-05	0.40791	0.420854	0.409035	0.411322	0.41894	0.4204	11	7	0	1	0	1	0	1.11394	5	FALSE	0
spcln3_cln000403|cln000634_cc676	847	12	11	Multiple																																											3	FALSE
spcln3_cln000666|cln000944|cln001411_cc731	847	12	7	Multiple																																											3	FALSE
spcln3_cln001368_cc783	847	12	8	Kmt2a	62	40.62	60,41|61,40|61,41|62,40|62,41|63,40|63,41|64,41	Kmt2a-Br	EP	100	B	0	1.39914	0.418427	0.76005	1.39914	1.66768	1.39914	1.66768	EP	0.418427	0.419936	3.11425e-05	0.401555	0.422303	0.416673	0.418655	0.421219	0.421793	0.418427	0.419936	3.11425e-05	0.401555	0.422303	0.416673	0.418655	0.421219	0.421793	12	8	0	1	0	1	0	1.11394	3	FALSE	0
spcln3_cln002019_cc844	847	12	6	Smarcd2	57.5	36.5	56,37|57,36|57,38|58,36|58,37|59,35	Smarcd2-As	EP	83.3	Neutrophil	16.7	1.23982	0.452889	0.773477	1.23982	1.87983	1.50245	1.87983	EP	0.452889	0.42113	0.00592386	0.416943	0.61782	0.417422	0.418532	0.422221	0.597949	0.419944	0.420209	4.6762e-06	0.416943	0.422879	0.417364	0.417856	0.42176	0.422089	10	6	0	2	0.450561	1.56919	0.277778	1.11394	3	FALSE	0
spcln4_cln000049_cc940	847	12	7	Rcor1	65	51	64,51|64,52|65,50|65,51|65,52|66,50|66,51	Rcor1-As	Macrophage Ly6c+	75	DBL	16.7	-0.225135	0.557523	0.579853	-0.225135	0.455961	-0.26307	0.455961	DBL	0.557523	0.557256	0.0024395	0.497685	0.659159	0.505259	0.522723	0.584084	0.605888	0.54623	0.556249	0.00130973	0.497685	0.599969	0.504417	0.522467	0.559601	0.59379	9	7	0	2	0.325083	1.38415	0.18	1.11394	4	FALSE	2
spcln4_cln000202_cc992	847	12	9	Mbd3	57.11	52.33	55,51|55,52|56,52|57,52|58,51|58,53|58,54|58,55|59,51	Mbd3-As	DC	50	cDC	41.7	-0.245054	0.0444505	0.0444505	-0.245054	0.548955	-0.401193	-0.254247	HSC	0.0444505	0.0444505		0.0444505	0.0444505	0.0444505	0.0444505	0.0444505	0.0444505										6	9	0	3	0.918428	2.50535	0.569444	1.11394	4	TRUE	3
spcln4_cln000633_cc1165	847	12	6	Hhex	65.83	45.67	64,46|65,46|66,45|66,46|67,45|67,46	Hhex-TF1.Br-1	EP	100	B	0	1.17106	0.412554	0.749381	1.17106	1.56676	1.17106	1.56676	EP	0.412554	0.415017	7.07493e-05	0.392357	0.421309	0.402576	0.409792	0.418355	0.420628	0.412554	0.415017	7.07493e-05	0.392357	0.421309	0.402576	0.409792	0.418355	0.420628	12	6	0	1	0	1	0	1.11394	4	FALSE	0
spcln4_cln000754_cc1213	847	12	4	Hoxa7	57.75	57.25	57,58|58,56|58,57|58,58	Hoxa7-TF1.Br	cDC	100	B	0	-0.438408			-0.438408	-0.126978	-0.438408	-0.126978	cDC																			12	4	0	1	0	1	0	1.11394	4	FALSE	3
spcln4_cln000913_cc1224	847	12	4	NTC	48.5	42.25	48,42|48,43|49,41|49,43	NTC-Ms-7	Neutrophil	66.7	Macrophage Ly6c+	33.3	-0.0418844	0.650443	0.797249	-0.0418844	0.777371	-0.1491	-0.076416	Macrophage Ly6c+	0.650443	0.648433	0.00418126	0.484486	0.776299	0.631656	0.642037	0.670178	0.680028	0.650033	0.646113	0.000218436	0.630574	0.675426	0.638146	0.642037	0.654583	0.670528	8	4	0	2	0.636514	1.88988	0.444444	1.11394	4	FALSE	1
spcln4_cln000943_cc1230	847	12	9	Cbx3	58	57.56	57,56|57,57|57,58|58,56|58,58|58,59|59,56|59,58|59,60	Cbx3-B	Neutrophil	41.7	cDC	33.3	-0.255618	0.622981	0.779513	-0.255618	0.647527	-0.181712	-0.102784	Macrophage Ly6c+	0.622981	0.63458	0.00177565	0.557786	0.660011	0.564297	0.601126	0.65312	0.657506	0.646889	0.650404	0.000148082	0.633614	0.660011	0.634	0.63458	0.655837	0.658341	5	9	0	3	1.0362	2.81848	0.628099	1.11394	4	FALSE	3
spcln4_cln000981_cc1236	847	12	5	Hoxa7	51.8	41.4	51,41|51,42|52,41|52,42|53,41	Hoxa7-TF1.Br	Neutrophil	100	B	0	-0.236365	0.636681	0.852368	-0.236365	0.0166913	-0.236365	0.0166913	Neutrophil	0.636681	0.637759	6.15918e-05	0.62284	0.650127	0.62728	0.631385	0.640436	0.645287	0.636681	0.637759	6.15918e-05	0.62284	0.650127	0.62728	0.631385	0.640436	0.645287	12	5	0	1	0	1	0	1.11394	4	FALSE	1
spcln4_cln007900_cc1556	847	12	7	Hhex	57.86	57.86	57,57|57,58|57,59|58,57|58,59|59,57|59,58	Hhex-TF1.Br	EP	91.7	Neutrophil	8.3	1.21396	0.439378	0.772285	1.21396	1.67853	1.33798	1.67853	EP	0.439378	0.421145	0.00434689	0.415146	0.648634	0.41777	0.420429	0.421475	0.422682	0.420355	0.421113	4.67579e-06	0.415146	0.422794	0.417492	0.420376	0.421336	0.421678	11	7	0	2	0.286836	1.33221	0.152778	1.11394	4	FALSE	0
spcln5_cln000607_cc1793	847	12	7	NTC	32	41.29	31,41|31,42|31,43|32,41|32,43|33,40|34,39	NTC-Ms-3	Neutrophil	58.3	DBL	16.7	0.402401	0.517575	0.713432	0.402401	0.907145	0.574052	0.907145	EP	0.517575	0.562355	0.00925592	0.354858	0.630595	0.382095	0.448638	0.58448	0.602306	0.571154	0.574264	0.00213447	0.481462	0.630595	0.52986	0.562355	0.593524	0.611736	7	7	0	3	0.801819	2.22959	0.46	1.11394	5	FALSE	1
spcln5_cln003578_cc2063	847	12	10	Hdac1	29.5	50.6	29,47|29,48|29,49|29,50|29,51|29,52|29,53|30,53|31,51|31,52	Hdac1-Br	Macrophage Ly6c+	41.7	Neutrophil	25	0.432415	0.517404	0.629522	0.432415	1.05801	0.563997	0.846834	EP	0.517404	0.552303	0.00942859	0.376589	0.630814	0.390851	0.420438	0.593764	0.614386	0.590755	0.603928	0.00131761	0.5432	0.630814	0.55123	0.563274	0.612561	0.623513	5	10	0	5	1.42413	4.15424	0.722222	1.11394	5	FALSE	3
spcln1_cln001598|cln003579_cc151	847	11	5	Multiple																																											1	FALSE
spcln1_cln001869_cc167	847	11	8	Cebpa	15.62	38.5	14,40|15,38|15,40|16,36|16,38|16,39|16,40|17,37	Cebpa-BR	EP	72.7	DBL	9.1	0.939931	0.441144	0.768032	0.939931	1.58438	1.2798	1.58438	EP	0.441144	0.419178	0.0048693	0.411504	0.627045	0.415456	0.416509	0.420254	0.463024	0.417906	0.418143	1.0741e-05	0.411504	0.422019	0.414962	0.416493	0.420239	0.420784	8	8	0	3	0.639032	1.89465	0.34	1.07918	1	FALSE	0
spcln1_cln003530|cln003706_cc200	847	11	2	Multiple																																											1	FALSE
spcln1_cln003634|cln003662_cc218	847	11	6	Cebpa	15.17	49.83	13,50|14,50|15,50|16,49|16,50|17,50	Cebpa-BR	EP	100	B	0	1.31001	0.412963	0.750124	1.31001	1.82882	1.31001	1.82882	EP	0.412963	0.416585	0.000114956	0.391156	0.420527	0.393491	0.412516	0.419997	0.420453	0.412963	0.416585	0.000114956	0.391156	0.420527	0.393491	0.412516	0.419997	0.420453	11	6	0	1	0	1	0	1.07918	1	FALSE	0
spcln280_bcsplit0_cc1	847	11	5	Mbd3	52.6	23.4	51,23|52,23|53,23|53,24|54,24	Mbd3-As	Neutrophil	90.9	EP	9.1	-0.160758	0.627003	0.857329	-0.160758	1.18693	-0.295527	0.14672	EP	0.627003	0.650706	0.0055369	0.412619	0.671687	0.595923	0.632844	0.66459	0.668417	0.648441	0.654207	0.00053473	0.595923	0.671687	0.628679	0.636303	0.665316	0.668744	10	5	0	2	0.304636	1.35613	0.165289	1.07918	3	FALSE	1
spcln2_cln000077|cln000117_cc318	847	11	6	Multiple																																											2	FALSE
spcln2_cln003530|cln003706_cc522	847	11	8	Multiple																																											2	FALSE
spcln3_cln000480_cc699	847	11	8	NTC	62	28.5	61,26|61,27|61,29|62,28|62,29|62,30|63,30|64,29	NTC-Ms-4	Neutrophil	72.7	Macrophage Ly6c+	18.2	0.0854954	0.613391	0.783634	0.0854954	0.789716	-0.0532304	0.789716	Macrophage Ly6c+	0.613391	0.627726	0.00157161	0.546149	0.663303	0.560782	0.587956	0.641645	0.652789	0.628169	0.632719	0.000753793	0.587588	0.663303	0.58862	0.615429	0.646	0.655125	8	8	0	3	0.759547	2.13731	0.429752	1.07918	3	FALSE	1
spcln3_cln000753|cln000786|cln000787|cln000792_cc741	847	11	8	Multiple																																											3	FALSE
spcln3_cln002356_cc847	847	11	8	Tal1	59.12	28.12	57,28|57,29|58,28|59,28|60,27|60,28|61,28|61,29	Tal1-TF1.Br-1	Macrophage Ly6c+	81.8	HSC	18.2	0.346841	0.468457	0.468457	0.346841	0.842705	0.404005	0.842705	Macrophage Ly6c+	0.468457	0.605451	0.0543432	0.0446735	0.666423	0.0577808	0.358999	0.625012	0.665744	0.561174	0.610589	0.014727	0.344157	0.666423	0.367904	0.534341	0.638062	0.66588	9	8	0	2	0.474139	1.60663	0.297521	1.07918	3	TRUE	2
spcln3_cln003708_cc887	847	11	8	Irf8	58	32.75	55,33|56,32|57,32|58,32|58,33|59,33|60,33|61,34	Irf8-TF1.Br-1	EP	90.9	DBL	9.1	1.09024	0.418386	0.759975	1.09024	1.75752	1.1858	1.75752	EP	0.418386	0.419347	1.2979e-05	0.409258	0.421237	0.414975	0.418447	0.420547	0.421102	0.418386	0.419347	1.2979e-05	0.409258	0.421237	0.414975	0.418447	0.420547	0.421102	10	8	0	1	0	1	0	1.07918	3	FALSE	0
spcln4_cln000007|cln000015_cc922	847	11	7	Multiple																																											4	FALSE
spcln4_cln000007|cln000015_cc924	847	11	8	Multiple																																											4	FALSE
spcln4_cln000434_cc1061	847	11	10	Hoxa7	56.8	44.2	56,42|56,44|57,41|57,42|57,43|57,44|57,45|57,46|57,47|57,48	Hoxa7-TF1.Br	EP	100	B	0	1.24669	0.40857	0.742145	1.24669	1.73217	1.24669	1.73217	EP	0.40857	0.406983	8.51357e-05	0.39288	0.420925	0.399576	0.403057	0.417067	0.42059	0.40857	0.406983	8.51357e-05	0.39288	0.420925	0.399576	0.403057	0.417067	0.42059	11	10	0	1	0	1	0	1.07918	4	FALSE	0
spcln4_cln000475_cc1071	847	11	10	Mbd3	55.6	53.7	55,52|55,53|55,54|55,55|55,56|55,57|56,52|56,53|57,52|57,53	Mbd3-As	EP	72.7	Neutrophil	27.3	0.95938	0.467911	0.769517	0.95938	1.76334	1.25135	1.76334	EP	0.467911	0.417552	0.00971284	0.394069	0.671428	0.399147	0.413723	0.50429	0.592776	0.411899	0.41555	9.83949e-05	0.394069	0.42096	0.397623	0.408993	0.418186	0.420351	8	10	0	2	0.585953	1.7967	0.396694	1.07918	4	FALSE	4
spcln4_cln000514|cln010392_cc1095	847	11	7	Multiple																																											4	FALSE
spcln4_cln000633_cc1160	847	11	9	Hhex	60.89	47.11	59,43|59,44|59,45|59,46|60,46|61,46|62,45|64,55|65,54	Hhex-TF1.Br-1	EP	81.8	DBL	9.1	0.911417	0.407716	0.740593	0.911417	1.70994	1.15149	1.70994	EP	0.407716	0.412532	0.000100221	0.389552	0.416565	0.391776	0.405449	0.414211	0.414731	0.407716	0.412532	0.000100221	0.389552	0.416565	0.391776	0.405449	0.414211	0.414731	9	9	0	2	0.325083	1.38415	0.18	1.07918	4	FALSE	0
spcln4_cln003578_cc1458	847	11	8	Hdac1	51.38	49	51,47|51,48|51,49|51,50|51,51|51,52|52,47|53,48	Hdac1-Br	Neutrophil	54.5	Macrophage Ly6c+	18.2	0.0410197	0.455405	0.566622	0.0410197	0.677392	0.0482644	0.677392	HSC	0.455405	0.55168	0.0408589	0.029968	0.644143	0.232028	0.32289	0.562317	0.622396	0.492447	0.544073	0.0233885	0.282543	0.644143	0.302716	0.375187	0.601736	0.630552	6	8	0	4	1.0889	2.971	0.58	1.07918	4	TRUE	1
spcln5_cln000170_cc1636	847	11	2	Mbd3	34.5	74	34,74|35,74	Mbd3-As	EP	100	B	0	1.29141	0.419015	0.761117	1.29141	1.68597	1.29141	1.68597	EP	0.419015	0.420932	1.90777e-05	0.409496	0.422776	0.414144	0.417069	0.421792	0.422663	0.419015	0.420932	1.90777e-05	0.409496	0.422776	0.414144	0.417069	0.421792	0.422663	11	2	0	1	0	1	0	1.07918	5	FALSE	0
spcln5_cln000475_cc1711	847	11	10	Mbd3	36.1	58.5	34,57|34,58|35,56|35,59|35,60|36,60|37,60|38,58|38,59|39,58	Mbd3-As	EP	54.5	Neutrophil	36.4	0.524791	0.497705	0.783495	0.524791	1.33713	1.08922	1.33713	EP	0.497705	0.41843	0.0135165	0.394612	0.65727	0.39966	0.409292	0.621331	0.647259	0.408871	0.410768	0.000100549	0.394612	0.421364	0.397416	0.402119	0.415051	0.41843	6	10	0	3	0.916465	2.50044	0.561983	1.07918	5	FALSE	4
spcln5_cln000505_cc1727	847	11	6	Mbd3	30.33	49.17	29,48|29,50|30,49|31,48|31,50|32,50	Mbd3-As	EP	100	B	0	1.04181	0.406233	0.737899	1.04181	1.47828	1.04181	1.47828	EP	0.406233	0.41191	0.000146842	0.386075	0.419908	0.390928	0.395668	0.416318	0.417701	0.406233	0.41191	0.000146842	0.386075	0.419908	0.390928	0.395668	0.416318	0.417701	11	6	0	1	0	1	0	1.07918	5	FALSE	0
spcln5_cln001590|cln001672_cc1960	847	11	9	Multiple																																											5	TRUE
spcln5_cln003634_cc2075	847	11	8	Cebpa	29.62	52.62	28,55|29,50|29,54|29,55|30,51|30,53|31,51|31,52	Cebpa-BR	EP	90.9	Neutrophil	9.1	1.13527	0.432664	0.758958	1.13527	1.69994	1.27939	1.69994	EP	0.432664	0.414852	0.00393005	0.400092	0.620625	0.407346	0.410873	0.420336	0.423814	0.413868	0.414624	4.86965e-05	0.400092	0.423814	0.40662	0.41082	0.418793	0.421163	10	8	0	2	0.304636	1.35613	0.165289	1.07918	5	FALSE	0
spcln5_cln003656|cln003699|cln006106_cc2094	847	11	6	Multiple																																											5	FALSE
spcln5_cln006193_cc2179	847	11	6	Rcor1	28.17	50.83	27,51|27,52|28,51|29,49|29,50|29,52	Rcor1-As	pDC	36.4	DC	27.3	0.345958	0.374064	0.374064	0.345958	0.785408	0.28222	0.732549	HSC	0.374064	0.454236	0.0546548	0.0315528	0.55623	0.153116	0.33546	0.492841	0.530874										4	6	0	4	1.29455	3.64934	0.710744	1.07918	5	TRUE	3
spcln5_cln006193_cc2181	847	11	7	Rcor1	31.29	46	31,45|31,46|31,47|31,48|31,49|32,43|32,44	Rcor1-As	Macrophage Ly6c+	45.5	pDC	27.3	0.406897	0.432249	0.432249	0.406897	0.728317	0.412433	0.728317	DC	0.432249	0.493919	0.0246	0.191392	0.572023	0.237756	0.335219	0.543422	0.565073	0.461875	0.499322	0.0241674	0.191392	0.572023	0.310241	0.488516	0.558122	0.566463	5	7	0	4	1.24068	3.45798	0.677686	1.07918	5	FALSE	3
spcln1_cln000607_cc97	847	10	8	NTC	19.88	41.75	17,41|18,42|19,42|20,42|21,41|21,42|21,43|22,41	NTC-Ms-3	Neutrophil	80	DC	10	0.355653	0.584699	0.782776	0.355653	0.781804	0.403411	0.781804	pDC	0.584699	0.599872	0.00681948	0.400982	0.688154	0.521237	0.576996	0.613606	0.646808	0.584699	0.599872	0.00681948	0.400982	0.688154	0.521237	0.576996	0.613606	0.646808	8	8	0	3	0.639032	1.89465	0.34	1.04139	1	FALSE	1
spcln1_cln001991|cln003710_cc190	847	10	5	Multiple																																											1	FALSE
spcln1_cln003634|cln003662_cc217	847	10	6	Cebpa	14.5	52.67	13,52|13,53|14,52|15,52|16,53|16,54	Cebpa-BR	EP	100	B	0	1.07947	0.407822	0.740785	1.07947	1.43169	1.07947	1.43169	EP	0.407822	0.40753	0.000104134	0.393333	0.422529	0.394882	0.401289	0.41618	0.418974	0.407822	0.40753	0.000104134	0.393333	0.422529	0.394882	0.401289	0.41618	0.418974	10	6	0	1	0	1	0	1.04139	1	FALSE	0
spcln2_cln000030_cc290	847	10	6	Multiple																																											2	FALSE
spcln2_cln000274_cc341	847	10	7	Runx1	47.57	26.57	47,25|47,26|47,29|48,25|48,26|48,27|48,28	Runx1-TF1.Br-1	EP	100	B	0	1.15715	0.407446	0.740103	1.15715	1.51576	1.15715	1.51576	EP	0.407446	0.409881	8.59107e-05	0.392772	0.419741	0.396427	0.399972	0.413063	0.418818	0.407446	0.409881	8.59107e-05	0.392772	0.419741	0.396427	0.399972	0.413063	0.418818	10	7	0	1	0	1	0	1.04139	2	FALSE	0
spcln2_cln000899|cln001506|cln001643|cln002342_cc407	847	10	8	Multiple																																											2	FALSE
spcln2_cln001245_cc432	847	10	7	Multiple																																											2	FALSE
spcln2_cln001245_cc434	847	10	7	Multiple																																											2	FALSE
spcln2_cln001506|cln001643_cc459	847	10	3	Multiple																																											2	FALSE
spcln2_cln001978_cc482	847	10	5	Multiple																																											2	FALSE
spcln2_cln001991_cc496	847	10	5	Multiple																																											2	FALSE
spcln2_cln003766|cln006108_cc559	847	10	6	Multiple																																											2	FALSE
spcln3_cln000403|cln000634_cc677	847	10	9	Multiple																																											3	FALSE
spcln3_cln000666|cln000944|cln001411_cc729	847	10	6	Hdac1	63.83	36	50,32|66,36|66,37|67,36|67,37|67,38	Hdac1-Br	EP	100	B	0	1.17834	0.415045	0.753906	1.17834	1.71098	1.17834	1.71098	EP	0.415045	0.416948	3.82369e-05	0.400308	0.42043	0.409669	0.412469	0.419269	0.420142	0.415045	0.416948	3.82369e-05	0.400308	0.42043	0.409669	0.412469	0.419269	0.420142	10	6	0	1	0	1	0	1.04139	3	FALSE	0
spcln3_cln000722_cc738	847	10	8	Kmt2a	57.62	23.12	56,22|56,23|57,22|57,23|58,23|59,23|59,24|59,25	Kmt2a-Br	Neutrophil	60	EP	20	-0.0305263	0.580831	0.80157	-0.0305263	1.20746	-0.41016	-0.189111	EP	0.580831	0.641878	0.0119253	0.40611	0.663358	0.407037	0.510025	0.653348	0.660243	0.650679	0.649957	9.30672e-05	0.639459	0.663358	0.640668	0.64305	0.657935	0.661411	6	8	0	3	0.848686	2.33657	0.493827	1.04139	3	FALSE	1
spcln3_cln003567|cln003692_cc862	847	10	6	Multiple																																											3	FALSE
spcln4_cln000168|cln000196|cln000272|cln000275_cc977	847	10	9	Multiple																																											4	FALSE
spcln4_cln000434_cc1063	847	10	8	Hoxa7	50.88	42.88	49,44|50,44|51,41|51,42|51,43|51,44|52,42|52,43	Hoxa7-TF1.Br	EP	90	DBL	10	1.02325	0.409573	0.743966	1.02325	1.58784	1.12875	1.58784	EP	0.409573	0.415663	0.000117065	0.3927	0.420094	0.394454	0.399166	0.416778	0.418818	0.409573	0.415663	0.000117065	0.3927	0.420094	0.394454	0.399166	0.416778	0.418818	9	8	0	1	0	1	0	1.04139	4	FALSE	0
spcln4_cln000629|cln001127|cln002018|cln002066_cc1156	847	10	5	Multiple																																											4	FALSE
spcln4_cln001488_cc1319	847	10	6	Cebpb	57.83	50.17	56,52|57,51|58,50|58,51|59,48|59,49	Cebpb-TF1.Br-1	Neutrophil	70	DC	20	-0.278497	0.634614	0.8496	-0.278497	-0.0611205	-0.195881	-0.0611205	Neutrophil	0.634614	0.64857	0.000611071	0.598447	0.65971	0.605596	0.614591	0.653194	0.656819	0.634614	0.64857	0.000611071	0.598447	0.65971	0.605596	0.614591	0.653194	0.656819	7	6	0	3	0.801819	2.22959	0.46	1.04139	4	FALSE	1
spcln4_cln001714|cln002714_cc1342	847	10	3	Multiple																																											4	FALSE
spcln4_cln001922|cln003940_cc1361	847	10	6	Multiple																																											4	FALSE
spcln4_cln002465|cln002692|cln002724_cc1389	847	10	5	Multiple																																											4	FALSE
spcln4_cln003118|cln003223|cln003675_cc1435	847	10	9	Multiple																																											4	FALSE
spcln4_cln004358_cc1507	847	10	6	Elk4	68.33	55	67,56|68,54|68,55|69,54|69,55|69,56	Elk4-TF1.Br-1	EP	100	B	0	1.27918	0.41203	0.748429	1.27918	1.53791	1.27918	1.53791	EP	0.41203	0.413165	3.7922e-05	0.397412	0.421461	0.408762	0.410204	0.414312	0.416397	0.41203	0.413165	3.7922e-05	0.397412	0.421461	0.408762	0.410204	0.414312	0.416397	10	6	0	1	0	1	0	1.04139	4	FALSE	0
spcln5_cln000475_cc1709	847	10	9	Mbd3	29.56	59.67	27,57|28,58|29,57|29,59|29,60|30,60|31,61|31,62|32,63	Mbd3-As	EP	60	Neutrophil	20	0.890048	0.473527	0.783331	0.890048	1.40372	1.31886	1.40372	EP	0.473527	0.419688	0.0109809	0.407743	0.645583	0.412996	0.417121	0.476534	0.642179	0.416986	0.418289	2.56646e-05	0.407743	0.421805	0.411495	0.415871	0.420116	0.421175	6	9	0	3	0.848686	2.33657	0.493827	1.04139	5	FALSE	4
spcln5_cln000695_cc1875	847	10	8	Phf10	26.62	62	25,62|25,64|26,61|26,63|27,60|27,62|28,62|29,62	Phf10-As-1	EP	100	B	0	1.05272	0.403553	0.733031	1.05272	1.55883	1.05272	1.55883	EP	0.403553	0.401947	0.000109728	0.388151	0.421311	0.389794	0.399074	0.40879	0.416514	0.403553	0.401947	0.000109728	0.388151	0.421311	0.389794	0.399074	0.40879	0.416514	10	8	0	1	0	1	0	1.04139	5	FALSE	0
spcln5_cln001097|cln001177|cln001377|cln001605_cc1905	847	10	9	Multiple																																											5	FALSE
spcln5_cln001573_cc1958	847	10	8	Atf7ip	37.75	44.62	35,44|36,45|37,45|37,46|38,45|39,45|40,43|40,44	Atf7ip-Br-1	EP	100	B	0	1.17157	0.409999	0.74474	1.17157	1.62229	1.17157	1.62229	EP	0.409999	0.413855	0.0001453	0.390777	0.423124	0.394108	0.400152	0.419764	0.421842	0.409999	0.413855	0.0001453	0.390777	0.423124	0.394108	0.400152	0.419764	0.421842	10	8	0	1	0	1	0	1.04139	5	FALSE	0
spcln1_cln000514|cln010392_cc69	847	9	3	Multiple																																											1	FALSE
spcln1_cln000549_cc80	847	9	5	Multiple																																											1	FALSE
spcln1_cln000607_cc98	847	9	7	NTC	14	42	13,41|13,42|13,43|14,41|14,42|15,42|16,43	NTC-Ms-3	Neutrophil	55.6	Macrophage Ly6c+	33.3	0.444197	0.561779	0.679505	0.444197	0.703372	0.44522	0.703372	Macrophage Ly6c+	0.561779	0.55129	0.0139622	0.403402	0.763085	0.43714	0.487496	0.619616	0.699274	0.556018	0.583852	0.0102556	0.403402	0.671927	0.449533	0.518729	0.602179	0.644028	5	7	0	3	0.936888	2.55203	0.567901	1	1	FALSE	1
spcln1_cln001368|cln001578_cc145	847	9	2	Kmt2a	20	31.5	20,31|20,32	Kmt2a-Br	EP	100	B	0	1.11628	0.407677	0.740521	1.11628	1.70189	1.11628	1.70189	EP	0.407677	0.405115	6.89814e-05	0.399092	0.420145	0.399441	0.401143	0.414143	0.419244	0.407677	0.405115	6.89814e-05	0.399092	0.420145	0.399441	0.401143	0.414143	0.419244	9	2	0	1	0	1	0	1	1	FALSE	0
spcln1_cln001777|cln003576_cc158	847	9	2	Multiple																																											1	FALSE
spcln1_cln003753_cc228	847	9	4	Gabpa	12.5	30	12,30|12,31|13,29|13,30	Gabpa-TF1.Br-1	Neutrophil	55.6	cDC	22.2	-0.343988	0.657189	0.879824	-0.343988	-0.168163	-0.291305	-0.168163	Early T	0.657189	0.658836	8.66364e-05	0.647723	0.669905	0.647992	0.648395	0.661088	0.666378	0.657189	0.658836	8.66364e-05	0.647723	0.669905	0.647992	0.648395	0.661088	0.666378	5	4	0	4	1.14906	3.15522	0.617284	1	1	FALSE	1
spcln1_cln006118_cc245	847	9	4	Multiple																																											1	FALSE
spcln273	847	9	5	Irf8	61.4	58.8	61,58|61,59|61,60|62,58|62,59	Irf8-TF1.Br-1	EP	100	B	0	1.42541	0.41335	0.750827	1.42541	1.80385	1.42541	1.80385	EP	0.41335	0.414259	3.43285e-05	0.402347	0.420614	0.407168	0.410206	0.418078	0.419906	0.41335	0.414259	3.43285e-05	0.402347	0.420614	0.407168	0.410206	0.418078	0.419906	9	5	0	1	0	1	0	1	4	FALSE	0
spcln277_bcsplit4_cc0	847	9	8	Mbd3	11.38	30.75	10,30|10,31|10,32|11,31|12,30|12,31|13,29|13,32	Mbd3-As	EP	88.9	Early T	11.1	1.10475	0.411882	0.748161	1.10475	1.76467	1.26248	1.76467	EP	0.411882	0.419632	0.000154682	0.388939	0.42124	0.395239	0.405099	0.420048	0.420506	0.411882	0.419632	0.000154682	0.388939	0.42124	0.395239	0.405099	0.420048	0.420506	8	8	0	2	0.348832	1.41741	0.197531	1	1	FALSE	0
spcln2_cln000666|cln000944|cln001411_cc385	847	9	5	Hdac1	34.2	25.6	33,26|34,25|34,26|35,25|35,26	Hdac1-Br	EP	88.9	DBL	11.1	1.1487	0.41884	0.760799	1.1487	1.36256	1.19241	1.36256	EP	0.41884	0.418344	9.06051e-06	0.414077	0.422924	0.415857	0.417016	0.421473	0.422238	0.41884	0.418344	9.06051e-06	0.414077	0.422924	0.415857	0.417016	0.421473	0.422238	8	5	0	1	0	1	0	1	2	FALSE	0
spcln2_cln001091_cc419	847	9	7	Rcor1	21.43	18.57	19,19|20,19|21,18|22,18|22,19|23,18|23,19	Rcor1-As-1	pDC	33.3	Early T	22.2	0.0161191	0.608236	0.814287	0.0161191	0.748531	0.0949624	0.715754	Early T	0.608236	0.608236	0.000543635	0.591749	0.624723	0.595047	0.599993	0.61648	0.621426										3	7	0	5	1.52296	4.58576	0.765432	1	2	FALSE	3
spcln2_cln001948|cln002090|cln003700_cc475	847	9	6	Rcor1	35	19.33	34,19|34,20|35,19|35,20|36,18|36,20	Rcor1-As-1	DC	44.4	cDC	33.3	-0.180957	0.541899	0.541899	-0.180957	0.673668	0.0472171	0.673668	DC	0.541899	0.541899		0.541899	0.541899	0.541899	0.541899	0.541899	0.541899										4	6	0	4	1.21489	3.36992	0.666667	1	2	FALSE	3
spcln2_cln001978_cc483	847	9	8	Multiple																																											2	FALSE
spcln2_cln001991_cc498	847	9	4	Wdr82	27	19.5	27,18|27,19|27,20|27,21	Wdr82-Br	EP	88.9	Neutrophil	11.1	1.13709	0.44284	0.769748	1.13709	1.72579	1.33473	1.72579	EP	0.44284	0.419428	0.00623022	0.40245	0.652753	0.412415	0.415823	0.420088	0.468523	0.4166	0.418602	3.86187e-05	0.40245	0.422466	0.411169	0.415594	0.419921	0.420802	8	4	0	2	0.348832	1.41741	0.197531	1	2	FALSE	0
spcln2_cln002124_cc508	847	9	4	Elk3	46.5	29.5	46,29|46,30|47,29|47,30	Elk3-TF1.Br-1	EP	100	B	0	0.824265	0.396887	0.720922	0.824265	1.23553	0.824265	1.23553	EP	0.396887	0.392092	0.000107883	0.385357	0.415988	0.387554	0.388662	0.403142	0.40764	0.396887	0.392092	0.000107883	0.385357	0.415988	0.387554	0.388662	0.403142	0.40764	9	4	0	1	0	1	0	1	2	FALSE	0
spcln306	847	9	7	Pax5	17.57	47.29	16,47|16,48|17,48|18,46|18,47|19,47|19,48	Pax5-TF1.Br	EP	100	B	0	1.26403	0.414201	0.752372	1.26403	1.60986	1.26403	1.60986	EP	0.414201	0.416621	4.77844e-05	0.401257	0.420674	0.403729	0.41365	0.418602	0.42029	0.414201	0.416621	4.77844e-05	0.401257	0.420674	0.403729	0.41365	0.418602	0.42029	9	7	0	1	0	1	0	1	1	FALSE	0
spcln306_bcsplit0	847	9	7	Pax5	18.43	48	17,47|17,48|18,48|19,47|19,49|19,50|20,47	Pax5-TF1.Br	EP	100	B	0	1.3183	0.420871	0.764488	1.3183	1.84221	1.3183	1.84221	EP	0.420871	0.421909	7.11977e-06	0.416589	0.423841	0.416609	0.419916	0.422763	0.422994	0.420871	0.421909	7.11977e-06	0.416589	0.423841	0.416609	0.419916	0.422763	0.422994	9	7	0	1	0	1	0	1	1	FALSE	0
spcln3_cln000007|cln000015_cc618	847	9	5	Multiple																																											3	FALSE
spcln3_cln000169_cc651	847	9	3	Multiple																																											3	FALSE
spcln3_cln000227_cc659	847	9	4	Cebpa	57.75	33.5	57,34|57,35|58,33|59,32	Cebpa-BR	EP	66.7	Neutrophil	33.3	0.5599	0.480978	0.772101	0.5599	1.29627	0.935329	1.29627	EP	0.480978	0.414562	0.013933	0.390455	0.644026	0.391395	0.397732	0.632974	0.638147	0.402521	0.401647	0.000120353	0.390455	0.415187	0.391043	0.393156	0.412312	0.414874	6	4	0	2	0.636514	1.88988	0.444444	1	3	FALSE	4
spcln3_cln000666|cln000944|cln001411_cc721	847	9	7	Multiple																																											3	FALSE
spcln3_cln000899|cln001506|cln001643|cln002342_cc750	847	9	3	Multiple																																											3	FALSE
spcln3_cln001308|cln001516_cc777	847	9	4	Tal1	57.5	31.5	57,31|57,32|58,30|58,33	Tal1-TF1.Br-1	Macrophage Ly6c+	66.7	DBL	11.1	-0.0759518	0.540383	0.540383	-0.0759518	0.601054	-0.0559417	0.533354	DC	0.540383	0.554499	0.00236145	0.468084	0.596869	0.483219	0.509095	0.569417	0.583432	0.540383	0.554499	0.00236145	0.468084	0.596869	0.483219	0.509095	0.569417	0.583432	6	4	0	3	0.735622	2.08678	0.40625	1	3	FALSE	2
spcln3_cln001973|cln003672|cln003702_cc820	847	9	7	Multiple																																											3	FALSE
spcln4_cln000175|cln000409|cln000898_cc982	847	9	6	Multiple																																											4	FALSE
spcln4_cln000406_cc1048	847	9	5	NTC	59.4	48.8	59,48|59,49|59,50|60,47|60,50	NTC-Ms-4	Neutrophil	88.9	pDC	11.1	-0.130713	0.646055	0.864917	-0.130713	0.637398	-0.217337	0.637398	pDC	0.646055	0.646201	0.00141355	0.60845	0.72335	0.610878	0.615728	0.652334	0.684821	0.646055	0.646201	0.00141355	0.60845	0.72335	0.610878	0.615728	0.652334	0.684821	8	5	0	2	0.348832	1.41741	0.197531	1	4	FALSE	1
spcln4_cln000505_cc1086	847	9	7	Mbd3	59.14	49.57	59,47|59,48|59,49|59,50|59,51|59,52|60,50	Mbd3-As	EP	100	B	0	1.18085	0.405458	0.736492	1.18085	1.7023	1.18085	1.7023	EP	0.405458	0.406934	0.000128805	0.389975	0.419213	0.390588	0.395168	0.413809	0.417789	0.405458	0.406934	0.000128805	0.389975	0.419213	0.390588	0.395168	0.413809	0.417789	9	7	0	1	0	1	0	1	4	FALSE	0
spcln4_cln000608|cln000750_cc1144	847	9	7	Brd9	54.43	60.14	52,59|53,60|54,61|55,59|55,61|56,60|56,61	Brd9-As	Neutrophil	88.9	MEP	11.1	-0.0671619	0.598645	0.789662	-0.0671619	0.613422	-0.137277	0.613422	MEP	0.598645	0.647158	0.0134882	0.313062	0.66205	0.476061	0.641867	0.655871	0.658185	0.634343	0.649508	0.0023076	0.516811	0.66205	0.60435	0.641898	0.656208	0.658668	8	7	0	2	0.348832	1.41741	0.197531	1	4	FALSE	1
spcln4_cln000722_cc1210	847	9	8	Kmt2a	57	49	55,48|55,49|56,50|57,48|57,50|58,49|59,48|59,50	Kmt2a-Br	Neutrophil	55.6	EP	44.4	0.332024	0.538633	0.806383	0.332024	1.35886	-0.119322	0.554685	EP	0.538633	0.595559	0.0174162	0.388107	0.668652	0.391986	0.404203	0.662084	0.665136	0.648188	0.662084	0.000911182	0.595559	0.668652	0.617491	0.650388	0.664258	0.666894	5	8	0	2	0.686962	1.98767	0.493827	1	4	FALSE	4
spcln4_cln001076|cln002640_cc1241	847	9	6	Rcor1	51.17	45.17	51,43|51,44|51,45|51,46|51,47|52,46	Rcor1-As-1	Neutrophil	33.3	Macrophage Ly6c+	22.2	0.120499	0.609996	0.73876	0.120499	0.522606	-0.148764	0.0791412	Macrophage Ly6c+	0.609996	0.635764	0.0040227	0.498528	0.650979	0.546981	0.619661	0.645049	0.648607	0.633491	0.635764	0.000165011	0.619661	0.645049	0.622882	0.627713	0.640407	0.643192	3	6	0	6	1.67699	5.34942	0.790123	1	4	FALSE	3
spcln4_cln003948|cln003961_cc1492	847	9	6	Irf8	51.17	53	50,52|51,52|51,53|51,55|52,52|52,54	Irf8-TF1.Br-1	Neutrophil	66.7	DBL	11.1	-0.298992	0.576061	0.763936	-0.298992	0.147468	-0.358046	-0.282641	MEP	0.576061	0.641779	0.0355159	0.150341	0.675758	0.432973	0.630381	0.651894	0.663957	0.647014	0.644738	0.000330264	0.621394	0.675758	0.630381	0.639971	0.653992	0.665924	6	6	0	3	0.735622	2.08678	0.40625	1	4	FALSE	1
spcln5_cln000170_cc1637	847	9	8	Mbd3	31.62	38.88	30,40|31,37|31,39|31,40|32,38|32,40|33,38|33,39	Mbd3-As	EP	77.8	Macrophage Ly6c+	22.2	1.06961	0.440968	0.703478	1.06961	1.55392	1.25043	1.55392	EP	0.440968	0.41795	0.00369375	0.397521	0.588341	0.406321	0.411117	0.420951	0.506952	0.413395	0.41682	7.10924e-05	0.397521	0.420951	0.404121	0.409819	0.419416	0.42091	7	8	0	2	0.529706	1.69843	0.345679	1	5	FALSE	0
spcln5_cln000434_cc1699	847	9	5	Hoxa7	31.8	51	31,51|31,52|32,50|32,52|33,50	Hoxa7-TF1.Br	EP	100	B	0	1.23528	0.413992	0.751993	1.23528	1.5163	1.23528	1.5163	EP	0.413992	0.415199	6.90765e-05	0.397159	0.42169	0.403119	0.412613	0.420343	0.421583	0.413992	0.415199	6.90765e-05	0.397159	0.42169	0.403119	0.412613	0.420343	0.421583	9	5	0	1	0	1	0	1	5	FALSE	0
spcln5_cln000514|cln010392_cc1747	847	9	7	NTC	31.71	47.14	30,49|31,47|31,48|32,46|32,47|33,46|33,47	NTC-Ms-7	EP	77.8	DBL	11.1	1.01957	0.440407	0.763684	1.01957	1.60779	1.2358	1.60779	EP	0.440407	0.417594	0.00458071	0.411049	0.607791	0.414018	0.416187	0.418707	0.475476	0.416495	0.416637	7.55485e-06	0.411049	0.418769	0.413594	0.415888	0.418618	0.41872	7	7	0	2	0.37677	1.45757	0.21875	1	5	FALSE	0
spcln5_cln000584_cc1790	847	9	8	Rcor1	43.88	56.5	43,55|43,57|43,58|43,59|44,54|44,56|45,56|46,57	Rcor1-As	MEP	33.3	Macrophage Ly6c+	33.3	-0.178613	0.289737	0.289737	-0.178613	0.359369	0.231835	0.359369	MEP	0.289737	0.2382	0.0288447	0.0992891	0.502297	0.134585	0.177664	0.436763	0.496427	0.215426	0.201015	0.00293853	0.16988	0.275384	0.176107	0.185448	0.2382	0.26051	3	8	0	4	1.31078	3.70908	0.716049	1	5	FALSE	3
spcln5_cln001368_cc1947	847	9	7	Kmt2a	28.43	56.57	26,54|27,55|28,56|29,57|29,59|30,57|30,58	Kmt2a-Br	EP	77.8	Neutrophil	22.2	0.951997	0.470438	0.786316	0.951997	1.55083	1.30077	1.55083	EP	0.470438	0.422461	0.00953769	0.418916	0.649892	0.419429	0.420504	0.42351	0.638148	0.421262	0.420664	3.27975e-06	0.418916	0.42351	0.419301	0.420031	0.422842	0.423338	7	7	0	2	0.529706	1.69843	0.345679	1	5	FALSE	4
spcln5_cln001604|cln003652_cc1965	847	9	6	Multiple																																											5	TRUE
spcln5_cln003634_cc2076	847	9	9	Cebpa	39.33	51.56	38,49|38,50|38,51|38,52|39,52|40,51|41,52|41,53|41,54	Cebpa-BR	EP	66.7	Neutrophil	33.3	0.734998	0.489682	0.789136	0.734998	1.61946	1.17005	1.61946	EP	0.489682	0.421899	0.0112525	0.410394	0.655471	0.417778	0.419769	0.610315	0.630936	0.419425	0.420649	2.15059e-05	0.410394	0.423333	0.415009	0.41966	0.421806	0.422616	6	9	0	2	0.636514	1.88988	0.444444	1	5	FALSE	4
spcln5_cln003634_cc2080	847	9	5	Cebpa	25.8	53.6	24,55|25,54|26,54|27,52|27,53	Cebpa-BR	EP	100	B	0	1.42731	0.413891	0.751809	1.42731	1.77358	1.42731	1.77358	EP	0.413891	0.415273	5.70464e-05	0.401311	0.421834	0.402092	0.412095	0.419656	0.421447	0.413891	0.415273	5.70464e-05	0.401311	0.421834	0.402092	0.412095	0.419656	0.421447	9	5	0	1	0	1	0	1	5	FALSE	0
spcln5_cln006110|cln006173_cc2158	847	9	5	Multiple																																											5	FALSE
spcln5_cln006207_cc2203	847	9	6	Cebpa	34.83	42	34,42|34,44|35,41|35,42|35,43|36,40	Cebpa-BR	EP	88.9	Neutrophil	11.1	1.24363	0.444207	0.772575	1.24363	1.70127	1.42179	1.70127	EP	0.444207	0.420667	0.00576092	0.409291	0.646296	0.414051	0.419785	0.421593	0.467637	0.418946	0.420604	2.0399e-05	0.409291	0.422972	0.413456	0.418649	0.421508	0.422007	8	6	0	2	0.348832	1.41741	0.197531	1	5	FALSE	0
spcln5_cln006207_cc2204	847	9	6	Cebpa	30.17	41.33	29,41|29,42|30,42|31,40|31,41|31,42	Cebpa-BR	EP	88.9	Neutrophil	11.1	1.11043	0.438231	0.762589	1.11043	1.75431	1.2979	1.75431	EP	0.438231	0.41261	0.00518385	0.409236	0.629906	0.409645	0.412066	0.420014	0.461992	0.414272	0.412443	1.98439e-05	0.409236	0.420014	0.409594	0.411486	0.418662	0.420014	8	6	0	2	0.348832	1.41741	0.197531	1	5	FALSE	0
spcln5_cln009342|cln009344_cc2215	847	9	8	Rcor1	26.38	53.25	25,54|26,51|26,53|26,54|26,55|27,52|27,55|28,52	Rcor1-As	Macrophage Ly6c+	55.6	BMP	22.2	0.206971	0.255162	0.255162	0.206971	0.806052	0.223529	0.548105	MEP	0.255162	0.265791	0.0205081	0.0413883	0.424166	0.111407	0.182239	0.351035	0.388289	0.269259	0.346903	0.0241447	0.0413883	0.424166	0.0974034	0.181426	0.352412	0.395464	5	8	0	3	0.900256	2.46023	0.53125	1	5	FALSE	2
spcln1_cln000044_cc6	847	8	5	Rcor1	8	35	7,35|8,34|8,35|8,36|9,35	Rcor1-As	Macrophage Ly6c+	100	B	0	-0.304811	0.553958	0.553958	-0.304811	0.466579	-0.304811	0.466579	Macrophage Ly6c+	0.553958	0.546435	0.00182502	0.481413	0.63337	0.52098	0.54062	0.571166	0.592165	0.553958	0.546435	0.00182502	0.481413	0.63337	0.52098	0.54062	0.571166	0.592165	8	5	0	1	0	1	0	0.954243	1	FALSE	2
spcln1_cln003579_cc210	847	8	5	Cebpe	18.8	48.8	18,49|18,50|19,48|19,50|20,47	Cebpe-TF1.Br	EP	100	B	0	1.30587	0.421384	0.76542	1.30587	1.65947	1.30587	1.65947	EP	0.421384	0.421849	3.66111e-06	0.418839	0.423388	0.418918	0.41972	0.423015	0.423325	0.421384	0.421849	3.66111e-06	0.418839	0.423388	0.418918	0.41972	0.423015	0.423325	8	5	0	1	0	1	0	0.954243	1	FALSE	0
spcln279_cc1	847	8	2	Mbd3	31.5	13	31,13|32,13	Mbd3-As	EP	87.5	Neutrophil	12.5	1.23027	0.442179	0.766498	1.23027	1.66261	1.44268	1.66261	EP	0.442179	0.419391	0.0048735	0.407595	0.61456	0.413043	0.416861	0.421128	0.480737	0.417553	0.418532	2.56867e-05	0.407595	0.423384	0.412265	0.416367	0.420313	0.42158	7	2	0	2	0.37677	1.45757	0.21875	0.954243	2	FALSE	0
spcln2_cln000007|cln000015_cc284	847	8	5	Multiple																																											2	FALSE
spcln2_cln000066_cc313	847	8	4	Cebpb	43.25	21.75	43,21|43,22|43,23|44,21	Cebpb-TF1.Br-1	Neutrophil	50	Macrophage Ly6c+	25	0.268488	0.54814	0.695425	0.268488	0.886393	-0.0509235	0.716101	EP	0.54814	0.61133	0.0193932	0.302795	0.664134	0.361224	0.470528	0.652762	0.661554	0.63681	0.653326	0.00167878	0.576455	0.664134	0.59738	0.628767	0.661369	0.663028	4	4	0	4	1.21301	3.36359	0.65625	0.954243	2	FALSE	1
spcln2_cln000321|cln002229_cc342	847	8	5	Multiple																																											2	FALSE
spcln2_cln000321|cln002229_cc346	847	8	6	Rcor1	43.83	27.83	42,28|43,27|43,29|44,28|45,27|46,28	Rcor1-As	Neutrophil	62.5	Macrophage Ly6c+	37.5	-0.279855	0.607073	0.742072	-0.279855	0.36263	-0.309089	-0.158173	Macrophage Ly6c+	0.607073	0.618277	0.00218363	0.534221	0.661748	0.551739	0.571138	0.644417	0.65054	0.637603	0.643977	0.000501999	0.601377	0.661748	0.614897	0.635178	0.645736	0.655343	5	6	0	2	0.661563	1.93782	0.46875	0.954243	2	FALSE	1
spcln2_cln000434_cc356	847	8	3	Hoxa7	35.67	29.33	35,29|36,29|36,30	Hoxa7-TF1.Br	EP	100	B	0	1.41968	0.416348	0.756273	1.41968	1.72041	1.41968	1.72041	EP	0.416348	0.417938	1.84198e-05	0.408372	0.41995	0.410629	0.41471	0.419499	0.419891	0.416348	0.417938	1.84198e-05	0.408372	0.41995	0.410629	0.41471	0.419499	0.419891	8	3	0	1	0	1	0	0.954243	2	FALSE	0
spcln2_cln001091_cc420	847	8	8	Rcor1	29.5	11.75	29,9|29,10|29,11|29,12|29,13|30,12|30,13|31,14	Rcor1-As-1	cDC	62.5	pDC	25	-0.230047	0.607452	0.813237	-0.230047	0.486529	-0.0924626	0.486529	cDC	0.607452	0.607452		0.607452	0.607452	0.607452	0.607452	0.607452	0.607452										5	8	0	3	0.900256	2.46023	0.53125	0.954243	2	FALSE	3
spcln2_cln002124_cc509	847	8	7	Elk3	40.86	26.71	39,25|40,25|41,26|41,27|41,28|42,27|42,29	Elk3-TF1.Br-1	EP	50	Neutrophil	50	0.20664	0.516834	0.785477	0.20664	0.930242	0.735368	0.930242	EP	0.516834	0.517913	0.0179281	0.382318	0.647858	0.387316	0.393561	0.641511	0.644743	0.391712	0.392193	5.82569e-05	0.382318	0.400144	0.38446	0.387673	0.396233	0.39858	4	7	0	2	0.693147	2	0.5	0.954243	2	FALSE	4
spcln2_cln003708_cc551	847	8	5	Irf8	18.4	14	17,13|18,14|18,15|19,14|20,14	Irf8-TF1.Br-1	EP	87.5	DBL	12.5	0.816999	0.410511	0.74567	0.816999	1.38799	0.847392	1.38799	EP	0.410511	0.413061	0.000182949	0.389448	0.422316	0.392265	0.402941	0.421434	0.421927	0.410511	0.413061	0.000182949	0.389448	0.422316	0.392265	0.402941	0.421434	0.421927	7	5	0	1	0	1	0	0.954243	2	FALSE	0
spcln2_cln006115|cln006117_cc588	847	8	5	Multiple																																											2	FALSE
spcln3_cln000136_cc648	847	8	4	Cebpb	72	30.75	71,31|72,30|72,32|73,30	Cebpb-TF1.Br-1	Neutrophil	100	B	0	-0.322973	0.655395	0.877421	-0.322973	-0.184189	-0.322973	-0.184189	Neutrophil	0.655395	0.656465	0.000134487	0.637206	0.671577	0.641596	0.649403	0.660481	0.66972	0.655395	0.656465	0.000134487	0.637206	0.671577	0.641596	0.649403	0.660481	0.66972	8	4	0	1	0	1	0	0.954243	3	FALSE	1
spcln3_cln000169_cc652	847	8	4	Multiple																																											3	FALSE
spcln3_cln000760|cln000768|cln000829_cc742	847	8	7	Multiple																																											3	FALSE
spcln3_cln001978|cln003575_cc837	847	8	5	Multiple																																											3	FALSE
spcln3_cln003687|cln003704_cc876	847	8	6	Multiple																																											3	FALSE
spcln4_cln000054|cln000112_cc950	847	8	7	NTC	63.29	52.86	61,52|62,53|63,54|63,55|64,53|65,51|65,52	NTC-Ms-4	Neutrophil	50	Macrophage Ly6c+	37.5	-0.163198	0.620031	0.742282	-0.163198	0.747241	-0.0711159	0.747241	Neutrophil	0.620031	0.635481	0.00191234	0.537154	0.663942	0.570739	0.603604	0.648219	0.658539	0.631522	0.634508	0.00112588	0.593129	0.663942	0.599414	0.608841	0.657188	0.66124	4	7	0	2	0.682908	1.97963	0.489796	0.954243	4	FALSE	1
spcln4_cln000060_cc951	847	8	6	Ebf1	58.17	57.67	57,59|58,56|58,57|58,59|59,57|59,58	Ebf1-B.Br	Macrophage Ly6c+	50	DC	25	0.276402	0.364816	0.364816	0.276402	0.664705	0.339377	0.63465	DBL	0.364816	0.354642	0.0511082	0.16937	0.580611	0.169492	0.169674	0.549784	0.56828	0.364816	0.354642	0.0511082	0.16937	0.580611	0.169492	0.169674	0.549784	0.56828	4	6	0	3	0.9557	2.60049	0.571429	0.954243	4	FALSE	2
spcln4_cln000108_cc965	847	8	4	Rcor1	58	56.75	57,57|58,56|58,57|59,57	Rcor1-As	Macrophage Ly6c+	87.5	MEP	12.5	0.0153901	0.495694	0.495694	0.0153901	0.535175	0.0224889	0.535175	Macrophage Ly6c+	0.495694	0.518363	0.0159174	0.200194	0.616487	0.404748	0.497803	0.555464	0.583433	0.537908	0.518527	0.00193787	0.492414	0.616487	0.496725	0.508899	0.560065	0.588155	7	4	0	2	0.37677	1.45757	0.21875	0.954243	4	FALSE	2
spcln4_cln000434_cc1065	847	8	6	Hoxa7	51.5	47.67	51,47|51,48|51,49|51,50|52,46|53,46	Hoxa7-TF1.Br	EP	100	B	0	1.43277	0.420419	0.763667	1.43277	1.76514	1.43277	1.76514	EP	0.420419	0.420285	1.24585e-06	0.419121	0.422472	0.419416	0.419638	0.420672	0.421877	0.420419	0.420285	1.24585e-06	0.419121	0.422472	0.419416	0.419638	0.420672	0.421877	8	6	0	1	0	1	0	0.954243	4	FALSE	0
spcln4_cln000514|cln010392_cc1092	847	8	6	Multiple																																											4	FALSE
spcln4_cln000514|cln010392_cc1098	847	8	5	Multiple																																											4	FALSE
spcln4_cln000607_cc1138	847	8	4	NTC	51	43.5	51,42|51,43|51,44|51,45	NTC-Ms-3	Neutrophil	50	EP	25	0.411034	0.488683	0.67618	0.411034	0.760523	0.442872	0.760523	Neutrophil	0.488683	0.487579	0.0145892	0.308494	0.649255	0.338752	0.42311	0.564617	0.61128	0.566446	0.564617	0.00468001	0.487296	0.649255	0.504089	0.529277	0.601786	0.630268	4	4	0	4	1.21301	3.36359	0.65625	0.954243	4	FALSE	4
spcln4_cln000979|cln000980_cc1234	847	8	4	Multiple																																											4	TRUE
spcln4_cln001120|cln001245|cln001917_cc1255	847	8	6	Multiple																																											4	FALSE
spcln4_cln001440_cc1316	847	8	5	Elk4																																											4	FALSE	3
spcln4_cln001601_cc1330	847	8	3	Cebpb	61	50.33	60,51|61,50|62,50	Cebpb-TF1.Br-1	EP	62.5	Neutrophil	37.5	0.668435	0.471012	0.752731	0.668435	1.27129	1.15687	1.27129	EP	0.471012	0.420254	0.00753158	0.395239	0.596339	0.401401	0.40555	0.55502	0.584085	0.409168	0.406052	0.000119702	0.395239	0.421483	0.39876	0.404042	0.419025	0.4205	5	3	0	2	0.661563	1.93782	0.46875	0.954243	4	FALSE	4
spcln4_cln001679|cln002174_cc1340	847	8	8	Mbd3	58.38	48.5	57,48|57,49|58,48|58,49|59,47|59,48|59,49|60,50	Mbd3-As	Macrophage Ly6c+	87.5	Neutrophil	12.5	0.284076	0.594223	0.619213	0.284076	0.920625	0.193141	0.722971	Neutrophil	0.594223	0.601539	0.00243462	0.505759	0.660841	0.542569	0.565812	0.62575	0.642538	0.594806	0.612933	0.00283723	0.505759	0.660841	0.53731	0.563323	0.628731	0.645153	7	8	0	2	0.37677	1.45757	0.21875	0.954243	4	FALSE	2
spcln4_cln002465|cln002692|cln002724_cc1388	847	8	5	Multiple																																											4	FALSE
spcln4_cln002638_cc1400	847	8	6	Hdac1	51.33	58.17	50,58|51,57|51,58|51,59|52,59|53,58	Hdac1-Br-1	EP	87.5	DBL Aggregate	12.5	1.14107	0.418272	0.759767	1.14107	1.56263	1.17277	1.56263	EP	0.418272	0.420253	1.58333e-05	0.412766	0.422949	0.413937	0.414882	0.421085	0.42189	0.418272	0.420253	1.58333e-05	0.412766	0.422949	0.413937	0.414882	0.421085	0.42189	7	6	0	1	0	1	0	0.954243	4	FALSE	0
spcln4_cln002684|cln004192|cln004402_cc1415	847	8	6	Multiple																																											4	FALSE
spcln4_cln003578_cc1454	847	8	5	Hdac1	56.2	52.4	55,52|56,52|56,53|57,52|57,53	Hdac1-Br	Macrophage Ly6c+	50	Neutrophil	25	0.380549	0.500027	0.575369	0.380549	0.899569	0.296611	0.782927	EP	0.500027	0.597834	0.0280662	0.264396	0.654655	0.292743	0.359294	0.632359	0.647602	0.629302	0.632359	0.00062464	0.597834	0.654655	0.605029	0.615823	0.645838	0.651128	4	5	0	4	1.21301	3.36359	0.65625	0.954243	4	FALSE	2
[truncated: 17,175 more rows]
[truncated: 2 more columns]
