# Supplementary material for: Spatially resolved, multimodal in vivo Perturb-seq using antibody-based cell hashing
Source: bioRxiv preprint, doi:10.64898/2026.05.25.727765, version 1 (2026-05-26)
Supplement: Extended Data Table 6 [file 727765_file05.xlsx]

## Sheet: DGE_index
contrast	cell_type	perturbation	n_target_chips	n_NTC_chips	n_target_cells_total	n_NTC_cells_total	DE_file_path	metadata_file_path	workbook_tab
EP_Hdac3	EP	Hdac3	3	10	350	12552	DE_results_perchip_colonyOnly/DE_limmatrend_perchip_EP_Hdac3.csv	DE_results_perchip_colonyOnly/metadata_perchip_EP_Hdac3.csv	DGE_Hdac3_erythroid
Macrophage Ly6c+_Rcor1	Macrophage Ly6c+	Rcor1	10	10	3020	545	DE_results_perchip_colonyOnly/DE_limmatrend_perchip_Macrophage Ly6c+_Rcor1.csv	DE_results_perchip_colonyOnly/metadata_perchip_Macrophage Ly6c+_Rcor1.csv	DGE_Rcor1_macrophage
Neutrophil_Hdac1	Neutrophil	Hdac1	9	10	425	2396	DE_results_perchip_colonyOnly/DE_limmatrend_perchip_Neutrophil_Hdac1.csv	DE_results_perchip_colonyOnly/metadata_perchip_Neutrophil_Hdac1.csv	DGE_Hdac1_neutrophil

## Sheet: DGE_Rcor1_macrophage
gene	logFC	AveExpr	t	P.Value	adj.P.Val	B
Mrpl15	-0.0801793	6.79025	-0.582364	0.565664	0.793933	-6.15997
Lypla1	-0.0250936	5.68401	-0.139779	0.889982	0.953582	-6.31993
Tcea1	0.229166	6.79492	1.3999	0.17413	0.495584	-5.38038
Atp6v1h	0.423315	5.48029	0.961062	0.345948	0.652796	-5.87287
Rb1cc1	0.459872	5.92775	2.21021	0.0367067	0.2391	-4.09103
4732440D04Rik	0.511686	2.14444	1.82165	0.0807907	0.351641	-4.76403
St18	1.9799	2.49965	5.73021	6.24471e-06	0.00135535	3.97693
Pcmtd1	0.332361	5.01789	1.84876	0.0766449	0.344125	-4.72011
Rrs1	-0.336079	5.84423	-1.58302	0.126294	0.43153	-5.12872
Mybl1	0.425788	2.65399	1.1626	0.256237	0.575115	-5.66695
Vcpip1	0.128406	5.79607	0.753963	0.458086	0.730967	-6.04651
1700034P13Rik	0.128936	2.11862	0.323146	0.749337	0.891134	-6.27724
Sgk3	0.220219	7.52781	1.57969	0.127054	0.432923	-5.13352
Mcmdc2	0.404081	2.6775	1.22053	0.233929	0.557321	-5.60128
Snhg6	-0.157691	5.12173	-0.423588	0.675577	0.854371	-6.23964
Cops5	-0.279238	6.37632	-2.09548	0.0466758	0.271305	-4.29913
Cspp1	0.487556	5.91206	1.06874	0.295646	0.611187	-5.76727
Arfgef1	0.278161	6.89477	1.85736	0.0753691	0.340667	-4.70608
Ncoa2	0.400039	6.42175	0.78849	0.438004	0.717064	-6.02031
Tram1	0.113215	7.70146	1.12425	0.271846	0.591121	-5.70885
Lactb2	0.730794	4.9584	1.97635	0.0595235	0.305847	-4.50711
Eya1	2.1617	2.64434	7.26512	1.5042e-07	0.000204044	7.46776
Terf1	-0.122101	6.08489	-0.591156	0.559853	0.790501	-6.15484
Rpl7	-0.0577083	10.8756	-0.546425	0.589736	0.808875	-6.18015
Rdh10	-0.412563	3.45999	-1.45656	0.157987	0.476376	-5.30526
Stau2	0.5471	2.3058	1.50165	0.146017	0.457179	-5.24369
Ube2w	0.278982	6.62661	2.28597	0.0312244	0.218752	-3.94966
Eloc	0.184568	7.09643	0.745737	0.46295	0.732885	-6.05258
Tmem70	0.029549	5.00475	0.149308	0.882538	0.950112	-6.31854
Ly96	0.299191	4.61613	0.99965	0.327291	0.638213	-5.83621
Mcm3	0.0433784	7.55003	0.220865	0.827036	0.926212	-6.30521
Paqr8	0.457194	1.92926	1.6301	0.115923	0.414181	-5.05996
Tram2	-0.118728	4.30133	-0.504565	0.618391	0.824766	-6.20208
Tmem14a	0.651593	2.2155	2.23865	0.0345539	0.231289	-4.03832
Kcnq5	0.983989	5.55143	1.70813	0.100304	0.386529	-4.94248
Ogfrl1	0.280524	6.96267	2.77423	0.010447	0.11655	-2.97206
Smap1	0.138338	6.42129	0.741536	0.465446	0.734694	-6.05566
Sdhaf4	0.73365	4.92249	1.93337	0.0648728	0.31846	-4.58001
Fam135a	0.906444	2.06612	2.80941	0.00962503	0.111571	-2.89774
Lmbrd1	0.304127	5.00974	0.759727	0.454696	0.728533	-6.04221
Phf3	-0.0158006	6.79325	-0.131576	0.896398	0.956287	-6.32105
Ptp4a1	0.120862	2.05353	0.328544	0.745303	0.889675	-6.27547
Prim2	0.0125593	5.95632	0.0742008	0.941456	0.975683	-6.327
Rab23	0.976055	2.45443	3.04788	0.00547237	0.0815744	-2.38235
Bag2	0.02133	3.35482	0.0554647	0.95622	0.981545	-6.32823
Zfp451	0.552238	4.77493	1.33671	0.193649	0.518105	-5.46118
Dst	2.38019	3.15292	6.47698	9.85609e-07	0.000465036	5.71294
Gm37233	1.43909	2.25849	5.16639	2.60027e-05	0.00297033	2.63072
Ccdc115	0.400677	6.04432	1.89579	0.0698914	0.328481	-4.64281
Imp4	-0.114351	5.71646	-0.638048	0.529386	0.770817	-6.12623
Ptpn18	0.139627	8.02647	1.06984	0.295158	0.611187	-5.76613
Gm28417	0.834416	2.55941	2.65201	0.0138479	0.137616	-3.22659
Fam168b	-0.00235127	5.92607	-0.0147188	0.988376	0.994982	-6.32967
Plekhb2	0.178391	4.63743	0.858987	0.398708	0.692395	-5.96338
Hs6st1	-0.222604	4.03374	-0.738308	0.467369	0.735377	-6.05802
Uggt1	0.167535	6.70544	1.20919	0.238176	0.55968	-5.61435
Neurl3	0.388846	3.82961	0.805764	0.428162	0.712421	-6.00678
Arid5a	-0.228456	4.6357	-1.0697	0.295222	0.611187	-5.76628
Kansl3	-0.101386	4.67992	-0.455095	0.653065	0.844836	-6.22579
Lman2l	0.105905	4.5346	0.272258	0.787714	0.909417	-6.29246
Cnnm4	-0.0582634	4.59717	-0.250256	0.804485	0.915809	-6.29824
Cnnm3	0.210513	3.84445	0.566784	0.576038	0.800508	-6.16887
Ankrd23	-0.0599467	1.90781	-0.229327	0.820526	0.922731	-6.30329
Ankrd39	0.573634	3.78473	1.79117	0.0856787	0.362772	-4.81279
Cox5b	-0.152181	9.00971	-0.957689	0.347613	0.654571	-5.87601
Actr1b	-0.21215	4.01087	-0.722962	0.476577	0.738197	-6.06907
Tmem131	0.0453341	6.70852	0.267081	0.791651	0.911513	-6.29386
Gm38115	1.13656	2.22205	3.72633	0.00102736	0.0282252	-0.831597
Inpp4a	0.421649	5.72376	2.14845	0.0418053	0.256278	-4.20398
Coa5	-0.205252	5.14601	-1.04369	0.306861	0.620266	-5.79275
Unc50	-0.0323887	5.27085	-0.204789	0.839436	0.932306	-6.30865
Mgat4a	0.50433	3.47387	1.09014	0.286302	0.603685	-5.74507
Tsga10	0.378668	3.74539	1.07898	0.291145	0.608177	-5.75669
Mitd1	0.887748	4.62831	2.16064	0.0407512	0.253258	-4.18185
Mrpl30	-0.0163439	7.02276	-0.115845	0.908724	0.961996	-6.32302
Txndc9	0.0698837	6.66872	0.338714	0.737723	0.885594	-6.27207
Eif5b	-0.0500076	6.9864	-0.370351	0.714316	0.873117	-6.26081
Rev1	0.056312	5.70248	0.306921	0.761507	0.897565	-6.28237
Aff3	0.610612	4.73992	0.983356	0.335083	0.646432	-5.85185
Pdcl3	0.579669	5.51132	1.32872	0.196232	0.520918	-5.47116
Rpl31	-0.0795606	9.4212	-0.558839	0.581364	0.803734	-6.17332
Tbc1d8	0.215538	6.13166	1.14118	0.264872	0.582951	-5.69051
Cnot11	0.186508	4.38315	0.488276	0.629714	0.830536	-6.21015
Gm15832	0.319625	2.19657	0.926912	0.36305	0.664926	-5.9042
Rnf149	-0.0132327	6.11963	-0.063084	0.950214	0.97862	-6.32777
Map4k4	0.258027	7.43326	2.28041	0.0315996	0.219817	-3.96013
Il1r2	1.26411	3.5165	2.73775	0.0113694	0.121557	-3.04865
Gm16894	0.796495	2.1652	2.23728	0.034655	0.231289	-4.04087
Il1r1	0.755113	2.18528	2.1774	0.0393412	0.249022	-4.1513
Il1rl2	1.57166	3.46961	3.67255	0.00117615	0.0306816	-0.957946
Il1rl1	0.385197	2.10418	1.26893	0.216436	0.54007	-5.54425
Il18rap	2.09674	4.26192	4.34539	0.000212701	0.0106874	0.647074
Mrps9	-0.0254244	6.14713	-0.150234	0.881815	0.950082	-6.3184
Tgfbrap1	0.463448	3.46307	1.33491	0.194227	0.518512	-5.46342
AI597479	0.323907	2.6744	0.854333	0.40123	0.694182	-5.96728
Nck2	1.02778	2.81342	2.85314	0.00868819	0.105072	-2.80468
Uxs1	0.421943	5.31797	1.01893	0.318233	0.631231	-5.81739
Tpp2	-0.112607	6.70983	-0.892306	0.380944	0.678819	-5.93488
Gm8251	-0.186467	2.12143	-0.530275	0.600714	0.813546	-6.18882
Tex30	0.339141	5.13639	0.763151	0.452689	0.727575	-6.03964
Poglut2	0.867867	3.64069	2.34601	0.0274209	0.204297	-3.83546
Bivm	1.0207	2.8311	2.72608	0.0116804	0.123735	-3.07305
Ercc5	0.50141	3.47067	1.24808	0.223845	0.547429	-5.56906
Wdr75	0.0220375	5.80019	0.129373	0.898123	0.957536	-6.32134
Slc40a1	0.879693	3.24364	2.16456	0.0404175	0.252365	-4.17472
Slc39a10	0.673504	4.69578	1.77174	0.0889271	0.369184	-4.84357
Nabp1	0.27344	4.95381	0.902246	0.375746	0.675211	-5.92618
Gm17767	0.159461	2.14525	0.355377	0.725361	0.87951	-6.26626
Stat4	2.12792	3.73002	5.94852	3.61906e-06	0.000935096	4.49085
Stat1	0.0922043	7.03907	0.518607	0.608706	0.819665	-6.19492
Gls	0.0567166	6.79319	0.396953	0.694853	0.863082	-6.25058
Nab1	0.0688065	6.26533	0.36484	0.718374	0.87488	-6.26284
Nemp2	0.417137	4.05178	1.19168	0.24485	0.566227	-5.63434
Mfsd6	0.0395257	5.10594	0.152857	0.879768	0.949786	-6.318
Inpp1	1.07789	4.17221	3.29953	0.00297119	0.0544651	-1.81958
Hibch	0.665898	4.72717	1.56131	0.131328	0.439869	-5.15988
Pms1	-0.0840179	4.11424	-0.311571	0.758013	0.895183	-6.28093
Ormdl1	-0.293861	4.77906	-1.33105	0.195475	0.520108	-5.46825
Osgepl1	-0.0994358	3.74731	-0.380562	0.706821	0.868776	-6.25697
Asnsd1	0.299155	6.01955	1.82087	0.0809115	0.351641	-4.76527
Stk17b	-0.0414441	6.35078	-0.236926	0.814692	0.919525	-6.30151
Hecw2	0.526618	2.32348	1.57057	0.129161	0.436109	-5.14664
Gtf3c3	0.737979	3.67746	1.80969	0.0826792	0.355511	-4.78324
Pgap1	1.15878	4.98724	3.29799	0.00298243	0.054487	-1.82307
Ankrd44	0.42413	7.86921	2.9863	0.00634038	0.0883258	-2.51724
4930444A19Rik	0.761286	1.8838	3.24113	0.00342774	0.0590442	-1.95171
Sf3b1	0.00394904	8.7239	0.0403752	0.968123	0.986763	-6.32896
Coq10b	-0.310281	4.94474	-1.22992	0.230455	0.554313	-5.59037
Hspd1	-0.352731	8.4446	-1.74635	0.0933292	0.375865	-4.88339
Hspe1	-0.401422	8.23734	-1.9536	0.0623048	0.311819	-4.54584
Mob4	-0.102639	6.30316	-0.749124	0.460943	0.73238	-6.05009
Mars2	-0.68993	3.40735	-1.96739	0.0606052	0.307906	-4.5224
Plcl1	-0.312555	4.32576	-0.661541	0.514465	0.760561	-6.1111
4930558J18Rik	-0.219227	2.04168	-0.674557	0.506299	0.757146	-6.1025
1700066M21Rik	1.07675	2.76115	3.35281	0.00260647	0.0498979	-1.69832
Tyw5	0.258332	3.62551	0.779845	0.442981	0.721157	-6.02697
Maip1	-0.175358	4.95237	-0.670764	0.508671	0.758359	-6.10502
Kctd18	0.633937	3.62926	1.91025	0.0679218	0.32428	-4.61876
Sgo2a	0.0857044	5.96009	0.445638	0.659787	0.847339	-6.23005
Aox3	1.05097	2.02028	3.41048	0.00226071	0.0462891	-1.56633
Bzw1	-0.105417	8.36261	-1.15214	0.260426	0.579594	-5.6785
Clk1	0.0354168	6.70668	0.219453	0.828123	0.926855	-6.30552
Ppil3	-0.16254	5.47144	-0.989374	0.33219	0.643859	-5.8461
Nif3l1	1.0336	2.96532	2.55626	0.0172103	0.156946	-3.42168
Orc2	0.260584	5.47748	0.602782	0.552216	0.786024	-6.14794
Fam126b	0.303752	4.86644	0.774198	0.446251	0.722659	-6.03129
Ndufb3	-0.067547	7.55897	-0.433163	0.668702	0.852016	-6.23554
Cflar	0.135146	6.19782	0.832756	0.413059	0.702919	-5.9851
Casp8	0.00392118	6.70811	0.0318012	0.974889	0.989374	-6.32927
Trak2	0.458974	5.0532	1.19058	0.245273	0.566681	-5.63558
Stradb	0.190055	3.40689	0.562888	0.578647	0.802327	-6.17106
Tmem237	1.38131	3.44115	3.17891	0.00398843	0.065292	-2.09149
Als2	0.784429	2.85861	2.38815	0.0250104	0.19484	-3.75423
Sumo1	-0.198266	7.33488	-1.57482	0.128176	0.434676	-5.14053
Nop58	-0.171168	7.13648	-0.724041	0.475926	0.738044	-6.0683
Bmpr2	0.972386	5.7458	2.15293	0.0414152	0.255007	-4.19586
Fam117b	0.163333	6.23485	0.851933	0.402535	0.695746	-5.96928
Wdr12	0.619675	5.51615	1.37829	0.180621	0.501739	-5.40837
Carf	0.719407	2.41564	1.91296	0.0675585	0.323619	-4.61424
Nbeal1	-0.0906347	5.39531	-0.3212	0.750794	0.891692	-6.27787
Cyp20a1	0.725765	4.89052	1.76692	0.0897497	0.371034	-4.85117
Abi2	0.970934	4.3389	2.50188	0.0194441	0.167999	-3.53068
Raph1	0.310803	6.07477	1.92673	0.065737	0.320314	-4.59119
Nrp2	1.36715	4.37303	4.04951	0.000452979	0.0166072	-0.0641476
Ino80d	0.359118	5.74977	2.34947	0.0272153	0.203927	-3.82883
Ino80dos	1.59999	3.02965	3.6268	0.00131917	0.0326842	-1.06505
Gm20342	0.930181	3.27789	2.73795	0.0113641	0.121557	-3.04823
Ndufs1	0.00371746	5.87051	0.022182	0.982483	0.992914	-6.32953
Eef1b2	-0.224664	9.95592	-1.70206	0.101452	0.388427	-4.95178
Fastkd2	-0.383256	3.88732	-1.27473	0.214409	0.53823	-5.53729
Klf7	0.567159	5.23144	2.46942	0.0209028	0.175843	-3.59511
Creb1	0.179589	6.46986	1.46253	0.156358	0.473173	-5.2972
Mettl21a	0.25971	3.30574	0.561098	0.579848	0.803007	-6.17206
2810408I11Rik	0.116386	4.53754	0.402589	0.690756	0.862312	-6.24833
Ccnyl1	0.635083	3.21399	1.54131	0.13611	0.445987	-5.18827
Fzd5	0.0137403	1.99421	0.0444851	0.96488	0.985031	-6.32878
Plekhm3	0.225531	7.37194	1.50234	0.145841	0.456771	-5.24274
D630023F18Rik	0.834206	2.06097	2.5822	0.0162311	0.151583	-3.36922
Idh1	0.269972	7.06383	1.36103	0.185942	0.508401	-5.43045
Pikfyve	0.744492	5.51696	1.71052	0.0998555	0.386184	-4.93882
Rpe	0.201401	5.47534	1.11595	0.275314	0.593469	-5.71776
Kansl1l	0.39498	4.40581	1.02888	0.313629	0.62668	-5.80756
Acadl	-0.0510936	7.30761	-0.427343	0.672877	0.853851	-6.23804
Lancl1	0.145395	3.55721	0.38703	0.702089	0.866582	-6.25448
Ikzf2	1.82384	3.57935	4.06466	0.000435828	0.0163042	-0.0278882
Bard1	-0.0342441	5.63171	-0.188002	0.85243	0.938572	-6.31197
Atic	-0.269031	6.84641	-1.67037	0.107626	0.39946	-4.99988
Fn1	-0.0616121	7.84992	-0.139494	0.890205	0.953582	-6.31997
Xrcc5	0.849779	2.68783	2.18973	0.0383316	0.245413	-4.12872
Smarcal1	0.619097	3.81836	1.43617	0.163653	0.483649	-5.33258
Rpl37a	-0.0899576	10.1762	-0.409124	0.686017	0.859784	-6.24567
Tns1	0.273089	1.89915	0.817904	0.421327	0.709184	-5.99711
Cxcr2	3.16476	4.49412	6.35335	1.33256e-06	0.00055619	5.43005
Arpc2	-0.00163579	9.83355	-0.0168176	0.986719	0.994767	-6.32964
Aamp	-0.151717	5.60937	-0.867138	0.394314	0.688499	-5.9565
Pnkd	-0.456297	4.96315	-1.91577	0.0671833	0.323028	-4.60955
Tmbim1	-0.13443	4.10583	-0.576179	0.569771	0.796703	-6.16353
Slc11a1	0.823452	4.24582	1.72833	0.0965653	0.38065	-4.91138
Ctdsp1	0.121519	4.91534	0.511014	0.613934	0.822511	-6.19882
Usp37	-0.20539	5.93469	-1.30475	0.20415	0.527857	-5.50081
Cnot9	-0.269544	5.34867	-1.30089	0.205448	0.528994	-5.50555
Zfp142	0.305082	3.48318	0.799767	0.431563	0.713698	-6.01151
Bcs1l	0.457257	3.17328	1.0754	0.292716	0.609186	-5.7604
Rnf25	0.791536	3.85946	1.86434	0.0743481	0.33886	-4.69467
Ttll4	0.46103	3.66516	1.32391	0.197802	0.521798	-5.47715
Cyp27a1	1.1771	4.17159	2.76311	0.0107205	0.117388	-2.99547
Nhej1	0.731956	2.96151	1.93783	0.0642995	0.317605	-4.57251
Cnppd1	0.0168542	5.76644	0.0835437	0.934101	0.972734	-6.32626
Retreg2	-0.204112	4.69889	-0.718171	0.479472	0.740462	-6.07248
Zfand2b	0.288985	4.63746	1.07094	0.294677	0.610624	-5.76501
Abcb6	-0.195976	2.13342	-0.646666	0.523885	0.766716	-6.12074
Atg9a	0.965992	3.5772	2.17461	0.0395731	0.249679	-4.15641
Ankzf1	0.205724	3.51581	0.495192	0.624894	0.828004	-6.20676
Glb1l	0.12067	2.96434	0.325785	0.747364	0.890278	-6.27638
Stk16	0.0760492	5.79572	0.379818	0.707366	0.868997	-6.25725
Tuba4a	0.402635	8.34417	1.99515	0.0573084	0.298864	-4.47486
Dnajb2	0.16955	2.27978	0.566875	0.575977	0.800508	-6.16882
Dnpep	1.00666	4.52321	2.69839	0.0124504	0.128137	-3.13071
Gmppa	0.456644	3.93444	1.27297	0.215023	0.53887	-5.53941
Stk11ip	0.651591	2.56155	1.72361	0.0974282	0.381921	-4.91867
Farsb	0.0955826	5.58387	0.32572	0.747413	0.890278	-6.2764
Acsl3	0.36699	4.64726	0.933148	0.359886	0.663527	-5.89856
Utp14b	0.339686	3.12549	0.941762	0.355545	0.660094	-5.89071
Ap1s3	1.27477	4.68639	3.65157	0.00123976	0.0318812	-1.00712
Wdfy1	0.093894	3.83936	0.253931	0.801676	0.914897	-6.29731
Mrpl44	0.0972406	5.5654	0.212013	0.833858	0.930491	-6.30713
Serpine2	0.282608	2.42219	0.713981	0.482013	0.740738	-6.07544
Cul3	0.240895	7.06307	1.92679	0.0657292	0.320314	-4.59109
Dock10	-0.0753836	9.41741	-0.675386	0.505781	0.756754	-6.10194
Rhbdd1	0.137511	4.7012	0.609869	0.547586	0.782514	-6.14368
Mff	0.756274	5.96634	1.67846	0.10602	0.395641	-4.98766
Agfg1	0.231802	6.16464	1.40248	0.173368	0.495088	-5.37702
Pid1	-0.163184	6.27354	-0.333811	0.741374	0.88762	-6.27372
Trip12	0.183931	6.85508	1.27187	0.215407	0.539113	-5.54073
Fbxo36	-0.162625	2.39719	-0.460884	0.648963	0.842408	-6.22314
C130026I21Rik	0.283628	2.13662	0.850232	0.403462	0.696527	-5.9707
Sp110	0.0425715	6.5592	0.313943	0.756233	0.894187	-6.28018
Sp140	0.802651	5.76124	1.90254	0.0689663	0.326561	-4.63161
Sp100	0.253045	7.78638	2.36134	0.0265203	0.200825	-3.80601
A630001G21Rik	0.582081	5.50552	1.31832	0.199637	0.523426	-5.48408
Cab39	0.488109	6.51593	0.970978	0.341086	0.650293	-5.86358
Itm2c	0.967615	5.9469	2.14798	0.0418471	0.256278	-4.20484
Psmd1	0.0586687	7.1807	0.427022	0.673107	0.853851	-6.23818
Armc9	0.785417	2.84304	2.14962	0.041703	0.255973	-4.20185
Ncl	0.0333409	9.50465	0.126407	0.900445	0.958379	-6.32173
C130036L24Rik	0.872592	2.00275	2.71114	0.0120901	0.125793	-3.1042
Ptma	0.0374187	12.5936	0.25584	0.800219	0.914142	-6.29682
Pde6d	0.728496	6.10134	5.05622	3.44403e-05	0.00340041	2.3653
Cops7b	0.399547	3.99208	1.11745	0.274685	0.59321	-5.71615
Dis3l2	0.474781	5.10248	1.16918	0.253625	0.573524	-5.65963
Eif4e2	0.486519	6.08029	1.03472	0.310946	0.624192	-5.80174
Gigyf2	0.167919	6.34981	0.874508	0.390368	0.685052	-5.95023
Inpp5d	0.0943196	7.53788	0.462473	0.647839	0.841555	-6.22241
Atg16l1	-0.161625	5.1291	-0.893536	0.380299	0.678082	-5.9338
Sag	0.567155	1.99535	1.99513	0.0573107	0.298864	-4.47489
Dgkd	0.154008	6.19553	1.08743	0.287471	0.604528	-5.7479
Usp40	0.449675	4.22604	1.27898	0.212935	0.536142	-5.53218
Gm20528	0.458359	2.33197	1.39479	0.175648	0.496964	-5.38703
Ugt1a7c	1.5545	3.01467	4.18037	0.000324415	0.0138604	0.249658
Ugt1a6a	0.259584	2.42151	0.758199	0.455593	0.729325	-6.04335
Hjurp	-0.0430691	6.47966	-0.317225	0.753771	0.893159	-6.27914
Glrp1	0.519498	1.96522	1.73774	0.0948642	0.378898	-4.89679
Gm29336	0.659389	1.94949	2.26407	0.032727	0.223812	-3.99083
Arl4c	0.643204	4.79619	1.44989	0.159823	0.478586	-5.31423
Sh3bp4	1.20663	2.34415	4.09671	0.00040164	0.0156222	0.0488767
Agap1	1.2866	4.74185	3.25871	0.00328363	0.0577535	-1.91203
D130058E05Rik	0.847916	2.42535	2.41385	0.0236376	0.187807	-3.70426
Cops8	0.0302333	5.29822	0.139943	0.889854	0.953582	-6.31991
Lrrfip1	-0.0831772	7.4965	-0.834445	0.412126	0.701963	-5.98372
Ramp1	0.247519	7.92708	1.62854	0.116254	0.414746	-5.06226
Ube2f	0.0832484	6.41879	0.418323	0.67937	0.856495	-6.24186
Scly	0.224872	4.39951	0.6179	0.542366	0.779311	-6.13878
Ilkap	-0.171046	6.2543	-1.14366	0.263862	0.582166	-5.6878
Hes6	0.865564	4.81557	2.34706	0.0273585	0.204297	-3.83345
Traf3ip1	0.297669	2.25853	1.1046	0.280105	0.598534	-5.72983
Asb1	0.288605	2.28165	0.79981	0.431538	0.713698	-6.01148
Hdac4	-0.233876	5.28345	-0.981785	0.33584	0.647343	-5.85335
Ndufa10	-0.157599	6.62009	-0.966834	0.343112	0.65181	-5.86747
Cops9	0.0892507	7.45584	0.408043	0.6868	0.860145	-6.24611
Otos	1.05175	2.14505	3.76195	0.000939162	0.0265242	-0.74767
Gpc1	0.585676	4.26503	1.29237	0.208334	0.531463	-5.51595
Dusp28	0.441657	2.40136	1.25583	0.221071	0.54485	-5.55989
Rnpepl1	0.25795	3.56414	0.565359	0.576991	0.801012	-6.16968
9430060I03Rik	0.573891	2.22655	1.58044	0.126883	0.432923	-5.13244
Capn10	0.826239	2.85294	2.50192	0.0194425	0.167999	-3.53061
Gpr35	0.338493	4.7108	0.788917	0.437759	0.717064	-6.01998
Mterf4	0.810669	2.81795	2.15518	0.0412208	0.254635	-4.19178
Pask	-0.0952669	2.57485	-0.207681	0.837202	0.931827	-6.30805
Ppp1r7	0.195605	5.98342	0.41635	0.680793	0.856675	-6.24268
Hdlbp	0.0333365	7.26608	0.268768	0.790368	0.911097	-6.29341
Sept2	0.590469	2.44125	1.59622	0.123312	0.426138	-5.10961
Farp2	-0.765801	2.30214	-1.93177	0.0650811	0.319054	-4.58272
Stk25	0.332162	4.56852	0.877983	0.388516	0.68319	-5.94725
Thap4	-0.0862179	3.06383	-0.231142	0.819131	0.922162	-6.30287
Atg4b	0.276472	4.68858	0.742895	0.464638	0.734353	-6.05467
Dtymk	-0.099514	7.66012	-0.510128	0.614546	0.822629	-6.19927
Ing5	0.119026	4.82506	0.475544	0.638629	0.835289	-6.21628
D2hgdh	-0.00447296	2.79674	-0.0129299	0.989789	0.995661	-6.3297
Fam174a	-0.0634017	6.14791	-0.341679	0.735517	0.88412	-6.27105
St8sia4	0.466724	7.09528	2.26086	0.0329532	0.224346	-3.99686
Slco4c1	0.341975	1.95372	0.888916	0.382728	0.679632	-5.93782
D1Ertd622e	0.304042	6.34664	1.9678	0.0605565	0.307906	-4.52171
Ppip5k2	0.247712	5.7747	1.54028	0.136361	0.445987	-5.18973
Gin1	-0.0851208	4.50979	-0.401085	0.691848	0.862572	-6.24893
Pam	0.982511	5.74977	3.49251	0.00184459	0.0405211	-1.37733
B230216N24Rik	0.39613	1.99914	1.17587	0.250992	0.57235	-5.65215
Gm28403	0.661622	2.01284	2.11443	0.0448782	0.26615	-4.26528
Pign	0.567329	5.60844	1.3321	0.195135	0.519657	-5.46694
Relch	0.174778	6.65628	1.10344	0.280599	0.598932	-5.73106
Tnfrsf11a	-0.229998	4.18174	-0.81906	0.42068	0.708775	-5.99619
Gm7160	0.346956	2.82151	1.08807	0.287193	0.604528	-5.74722
Zcchc2	0.735758	4.53809	1.80964	0.0826873	0.355511	-4.78332
Phlpp1	-0.293448	4.10824	-0.686065	0.49914	0.753315	-6.09475
Bcl2	-0.277718	4.91937	-0.507395	0.616433	0.823824	-6.20065
Kdsr	0.377113	3.20701	0.973166	0.34002	0.650087	-5.86151
Vps4b	0.0872363	6.64304	0.667242	0.510879	0.759451	-6.10735
Serpinb2	0.844009	4.74825	2.31223	0.0295052	0.212132	-3.89994
Serpinb8	-0.0951315	2.49169	-0.23127	0.819033	0.922162	-6.30284
Tsn	0.0348576	7.46167	0.262174	0.795388	0.912156	-6.29517
Nifk	0.33997	5.66151	0.767283	0.450274	0.725735	-6.03653
Clasp1	0.167359	6.18823	0.944881	0.353983	0.659342	-5.88785
Ralb	0.052845	6.72568	0.38075	0.706683	0.868776	-6.2569
Tmem185b	0.139463	4.40651	0.558524	0.581576	0.803778	-6.1735
Ptpn4	-0.0540698	4.62514	-0.157987	0.875767	0.948786	-6.3172
Tmem177	0.353643	2.14529	1.1242	0.271865	0.591121	-5.7089
Tmem37	1.15008	2.33968	3.39804	0.00233128	0.0471902	-1.59485
Dbi	0.13973	9.47864	1.03231	0.312051	0.624919	-5.80414
3110009E18Rik	0.286168	3.8553	0.820405	0.419928	0.708372	-5.99511
Steap3	0.609468	4.10044	1.37144	0.182719	0.503594	-5.41716
Insig2	0.537014	3.9133	1.45458	0.158531	0.477189	-5.30793
Ccdc93	0.579239	4.18317	1.60476	0.121413	0.424376	-5.09718
Ddx18	0.0525344	5.88589	0.237765	0.814049	0.919525	-6.30131
Actr3	-0.0144858	9.69167	-0.130079	0.897571	0.957291	-6.32125
Slc35f5	0.671087	2.71055	1.73922	0.0945991	0.37835	-4.8945
Mgat5	1.11166	6.60456	2.25748	0.033192	0.225689	-4.00318
Ccnt2	0.227613	5.30186	0.552031	0.585948	0.80684	-6.17709
Rab3gap1	0.50316	5.37748	1.21903	0.234488	0.557466	-5.60302
Zranb3	0.042524	4.31169	0.109413	0.913769	0.963921	-6.32375
R3hdm1	0.111717	6.79921	0.804374	0.428949	0.712496	-6.00788
Ubxn4	0.0655292	7.1163	0.525925	0.603688	0.816049	-6.19111
Mcm6	0.0793212	6.78256	0.34755	0.731158	0.882104	-6.26902
Dars	0.00636252	6.76645	0.0507518	0.959936	0.98326	-6.32848
Cxcr4	0.137373	6.98389	0.880438	0.387212	0.682402	-5.94514
Cd55	0.404628	2.80244	1.22332	0.232893	0.555706	-5.59805
Pfkfb2	1.26653	2.44799	3.95891	0.000570395	0.0193919	-0.280521
Yod1	1.17771	2.92306	3.12079	0.00459135	0.071898	-2.22111
Mapkapk2	0.0310746	7.37358	0.177742	0.860393	0.941703	-6.31386
Dyrk3	0.656414	3.42835	2.13092	0.0433641	0.260858	-4.23564
Eif2d	0.694593	4.36429	1.90514	0.0686124	0.325571	-4.62728
Rassf5	0.607894	5.36903	1.49374	0.148063	0.461322	-5.25461
Ikbke	0.353718	5.29003	2.01519	0.0550281	0.294344	-4.44025
Srgap2	0.156157	7.48651	1.39425	0.175808	0.497013	-5.38773
Gm29488	0.419108	2.28092	1.21574	0.235714	0.558286	-5.60681
Fam72a	0.662596	2.88884	1.6902	0.103727	0.391531	-4.96987
Ctse	0.438941	5.27615	1.55064	0.133863	0.44402	-5.17507
Rab7b	1.77356	4.56763	4.03088	0.000474986	0.0172393	-0.108704
Slc41a1	0.603942	2.44009	1.94388	0.0635282	0.315563	-4.5623
Rab29	0.57943	5.56384	2.94644	0.00697086	0.0936234	-2.60392
Nucks1	-0.0760261	8.33898	-0.638761	0.528929	0.770732	-6.12578
Elk4	0.794343	4.79209	1.997	0.0570945	0.298453	-4.47167
Nuak2	-0.0366513	5.04491	-0.184812	0.854904	0.93958	-6.31257
Tmcc2	1.55032	2.37639	5.33324	1.701e-05	0.00227893	3.03148
Dstyk	0.592922	5.44189	2.52094	0.0186323	0.164591	-3.49263
6030442K20Rik	0.297448	2.19818	0.817957	0.421298	0.709184	-5.99707
Rbbp5	0.330373	5.09179	0.797894	0.432629	0.714377	-6.01298
Tmem81	0.373453	1.91401	1.51672	0.142186	0.452891	-5.22277
Mdm4	0.62308	5.97037	1.38015	0.180054	0.501141	-5.40597
Ppp1r15b	0.170518	5.65297	0.89205	0.381079	0.678846	-5.9351
Snrpe	-0.108909	8.9753	-0.734526	0.469629	0.736185	-6.06076
Zc3h11a	0.417418	2.0486	1.22825	0.231071	0.55483	-5.59232
Atp2b4	0.845787	5.40523	2.01022	0.0555859	0.294728	-4.44885
Btg2	0.584799	6.55116	2.05578	0.0506528	0.282721	-4.36938
Chil1	0.0870295	2.29694	0.245355	0.808234	0.917672	-6.29946
Ppfia4	0.547509	4.37526	1.28217	0.211831	0.53535	-5.52832
Tmem183a	-0.0762784	5.18014	-0.416379	0.680772	0.856675	-6.24267
Cyb5r1	-0.0001655	4.79579	-0.000844986	0.999333	0.999676	-6.32978
Adipor1	0.319594	6.75852	1.49781	0.147008	0.458933	-5.249
Klhl12	1.15678	3.36299	2.77219	0.0104968	0.116895	-2.97636
Rabif	-0.0414831	4.32543	-0.191783	0.849499	0.937401	-6.31125
Kdm5b	2.09042	3.61098	4.67847	9.05697e-05	0.00592086	1.45227
Ppp1r12b	0.185399	4.89026	0.453452	0.65423	0.845102	-6.22654
Ube2t	0.376078	4.81538	0.956768	0.348068	0.65492	-5.87687
Ptpn7	0.152247	5.93882	0.598524	0.555006	0.787584	-6.15048
Arl8a	-0.194841	5.80997	-1.33314	0.194799	0.519018	-5.46564
Rnpep	-0.00764709	7.40952	-0.0636225	0.949789	0.978461	-6.32774
Timm17a	0.0139866	6.21918	0.0684979	0.945947	0.977197	-6.32741
Ipo9	-0.287618	5.40896	-1.57212	0.1288	0.435521	-5.1444
Nav1	1.95089	5.70915	4.26825	0.000259134	0.0120837	0.461107
Csrp1	0.840545	5.38029	2.06995	0.0491999	0.278082	-4.34441
Tmem9	0.592546	3.41357	1.40876	0.171521	0.49294	-5.36879
Kif21b	0.520267	4.25596	1.39234	0.176379	0.497112	-5.39021
Camsap2	0.158693	4.44291	0.630252	0.534388	0.773869	-6.13113
9230116N13Rik	0.149678	2.32288	0.401026	0.691891	0.862572	-6.24896
Ddx59	0.0441562	2.88585	0.132653	0.895556	0.955894	-6.32091
Kif14	0.201698	5.06729	0.475725	0.638502	0.835289	-6.2162
Zfp281	-0.266436	3.9815	-1.1888	0.24596	0.567039	-5.6376
Gm4258	0.372277	5.31926	0.788396	0.438058	0.717064	-6.02038
Ptprc	0.141781	9.4539	0.767904	0.449912	0.725735	-6.03606
Nek7	0.384598	6.48865	1.98102	0.0589667	0.304317	-4.49912
2310009B15Rik	-0.247761	5.09647	-1.3213	0.198657	0.522624	-5.48039
Dennd1b	0.499556	6.80447	2.4449	0.0220711	0.181451	-3.64345
Zbtb41	0.0829689	3.65118	0.240255	0.81214	0.919178	-6.30071
Aspm	0.210403	5.85514	0.758959	0.455147	0.728933	-6.04278
Cfh	-0.00699802	4.77935	-0.0144619	0.988579	0.994982	-6.32968
Cdc73	0.0701316	5.98338	0.507667	0.616245	0.823789	-6.20052
Glrx2	0.140363	6.443	0.751649	0.459451	0.731294	-6.04822
Ro60	0.236171	2.40713	0.740413	0.466115	0.734731	-6.05648
Uchl5	0.1552	7.07971	0.62639	0.536876	0.775273	-6.13354
Gm29170	-0.498002	2.81263	-1.37711	0.180981	0.501782	-5.40988
Rgs2	-0.00743867	7.85495	-0.0514378	0.959395	0.983177	-6.32845
Rgs18	0.97867	6.45687	6.718	5.50242e-07	0.000314275	6.25871
Pla2g4a	-0.263758	6.62634	-1.51777	0.141922	0.452891	-5.22131
Ptgs2	-0.0696758	2.17904	-0.164075	0.871024	0.947323	-6.31621
Odr4	0.168999	5.43788	0.948874	0.351988	0.658128	-5.88417
Tpr	-0.174875	8.74855	-2.33308	0.0282025	0.207494	-3.86022
Gm10138	-0.0496517	2.88701	-0.138904	0.890666	0.953582	-6.32005
Ivns1abp	-0.0091022	6.37161	-0.0472932	0.962664	0.984044	-6.32865
Swt1	0.618029	4.97676	1.53733	0.13708	0.446455	-5.19389
Trmt1l	0.796568	4.82561	2.16004	0.0408027	0.253258	-4.18295
Rnf2	0.473216	4.36891	1.32901	0.196138	0.520795	-5.4708
Fam129a	0.40249	6.46197	1.3803	0.180009	0.501141	-5.40578
Edem3	0.357453	4.72166	1.22464	0.232401	0.555387	-5.59651
1700025G04Rik	0.645281	6.0056	1.38189	0.179528	0.500568	-5.40373
Tsen15	0.5468	4.31658	1.50711	0.144621	0.455939	-5.23614
Rgl1	0.0532073	2.88977	0.10923	0.913913	0.963921	-6.32377
Arpc5	0.0861494	9.53726	0.736609	0.468383	0.735868	-6.05925
Ncf2	-0.103345	7.77237	-0.672462	0.507608	0.757843	-6.10389
Smg7	0.420988	5.64756	0.949809	0.351523	0.657772	-5.88331
Gm28791	-0.0345749	2.2192	-0.115705	0.908833	0.961996	-6.32303
Lamc1	0.392564	2.70866	0.890802	0.381735	0.679005	-5.93618
E330020D12Rik	0.98404	4.44092	2.14732	0.0419048	0.256424	-4.20603
Dhx9	0.0642538	7.41474	0.408285	0.686625	0.860096	-6.24601
Npl	1.13305	3.38476	3.64885	0.00124824	0.0319004	-1.01348
Rnasel	0.475238	5.19981	2.1439	0.0422056	0.257182	-4.21222
Glul	0.376754	5.41046	1.47734	0.152377	0.468368	-5.27708
Ier5	0.116155	5.3223	0.508742	0.615503	0.823402	-6.19997
Mr1	0.506619	2.10341	1.67311	0.10708	0.398501	-4.99575
Stx6	0.383029	4.76955	0.956119	0.34839	0.655011	-5.87747
Xpr1	1.12229	6.25428	2.23393	0.0349033	0.232374	-4.0471
Acbd6	0.708218	5.80673	1.62529	0.116948	0.415969	-5.06706
Qsox1	0.73572	3.7908	2.13269	0.0432043	0.260329	-4.23245
Cep350	-0.0605723	7.41701	-0.570819	0.573342	0.798886	-6.16659
Tor1aip1	0.240265	7.36008	1.68891	0.103976	0.391929	-4.97182
Tor1aip2	0.0917294	6.00799	0.551651	0.586204	0.806988	-6.1773
Axdnd1	0.422613	1.93193	1.47121	0.154015	0.47034	-5.28543
Gm2000	0.178624	4.42417	0.61754	0.542599	0.779311	-6.139
Soat1	0.260572	7.78308	1.97115	0.0601498	0.307136	-4.516
Abl2	0.0703506	5.04185	0.364588	0.718559	0.87494	-6.26294
Tor3a	-0.200316	5.54473	-1.06332	0.298048	0.612232	-5.77283
Fam20b	0.162496	4.70541	0.413057	0.683172	0.85793	-6.24405
Ralgps2	0.37665	4.04804	0.942843	0.355003	0.660017	-5.88972
Rasal2	-0.0841654	3.92045	-0.192369	0.849045	0.937318	-6.31113
Cryzl2	0.914905	2.42887	2.59055	0.015927	0.150133	-3.35227
Cop1	0.499808	6.82258	3.18211	0.00395757	0.0649736	-2.08433
4930523C07Rik	1.19166	6.15267	2.64414	0.0140992	0.139221	-3.24277
Mrps14	0.0122737	7.59234	0.101931	0.919644	0.967379	-6.32454
Cacybp	-0.219031	7.89337	-1.3891	0.177351	0.497853	-5.39441
Rabgap1l	1.35514	6.72718	6.50196	9.27538e-07	0.000457529	5.76985
Rc3h1	0.0459005	6.14757	0.25937	0.797526	0.913057	-6.2959
Zbtb37	-0.155472	2.75915	-0.403534	0.69007	0.862244	-6.24794
Gas5	-0.191982	8.07199	-1.12643	0.270938	0.590288	-5.7065
Dars2	0.328052	3.87704	0.950676	0.351091	0.657697	-5.88251
Cenpl	-0.168832	4.71824	-0.835711	0.411426	0.701813	-5.98268
Klhl20	-0.133426	4.57172	-0.637864	0.529503	0.77083	-6.12635
Prdx6	0.521273	7.81836	3.03109	0.00569699	0.0830964	-2.41924
Suco	0.903284	5.77386	2.00651	0.0560057	0.29543	-4.45527
Pigc	0.119209	3.57326	0.404691	0.68923	0.861498	-6.24748
Eef1aknmt	0.00626044	2.89823	0.0178345	0.985916	0.994517	-6.32962
Vamp4	-0.0431991	6.18065	-0.232373	0.818187	0.921628	-6.30258
Prrc2c	-0.00269698	8.48024	-0.0325037	0.974335	0.989285	-6.32925
Gorab	0.289718	3.25503	0.916632	0.368307	0.66826	-5.91343
Kifap3	1.1377	3.69274	3.09409	0.00489694	0.0752714	-2.28035
Scyl3	-0.0879927	4.76058	-0.326007	0.747198	0.890278	-6.27631
BC055324	0.24416	3.59551	0.621503	0.540032	0.777968	-6.13657
Mettl18	0.794088	2.47704	2.35191	0.0270711	0.203164	-3.82414
Sell	0.608182	8.58026	4.41966	0.000175849	0.00949411	0.826371
Selp	1.38861	3.28826	3.35881	0.00256826	0.0497683	-1.68463
F5	1.27609	5.53681	4.45202	0.000161853	0.00900733	0.904558
Slc19a2	-0.173603	2.38069	-0.608136	0.548717	0.783681	-6.14472
Ccdc181	0.683617	2.89956	1.62698	0.116587	0.415366	-5.06457
Blzf1	0.627149	3.86932	1.53876	0.136731	0.446257	-5.19188
Nme7	0.218156	3.8524	0.581548	0.566205	0.794063	-6.16044
Sft2d2	0.346901	4.34314	1.19579	0.243269	0.565323	-5.62967
Tiprl	0.225876	5.68437	1.29249	0.208293	0.531463	-5.5158
Gm38190	0.159805	1.99467	0.493475	0.626089	0.828774	-6.20761
Dcaf6	1.1605	4.15296	2.99001	0.00628462	0.0880742	-2.50916
Mpc2	0.170961	7.6563	1.2849	0.210891	0.534841	-5.52502
Mpzl1	0.68815	2.2242	2.14292	0.0422916	0.257286	-4.21398
Rcsd1	0.703534	6.43186	1.42251	0.167536	0.487725	-5.35069
Creg1	0.202063	8.69098	2.39516	0.0246286	0.192715	-3.74063
Pou2f1	-0.222123	5.5864	-1.52831	0.139295	0.450025	-5.20657
Tada1	0.0428866	4.67795	0.11287	0.911057	0.962339	-6.32336
Pogk	0.639549	2.59246	1.74242	0.0940266	0.377648	-4.88951
Uck2	0.0421424	6.48474	0.175482	0.862149	0.942556	-6.31426
Tmco1	-0.14714	7.19917	-1.21599	0.235623	0.558286	-5.60653
Aldh9a1	0.171899	6.21437	0.957986	0.347466	0.654522	-5.87574
Mgst3	0.791648	6.72876	3.91754	0.000633556	0.0206467	-0.379022
Pbx1	2.04709	6.20894	4.38925	0.0001901	0.0100116	0.752928
Nuf2	-0.225267	5.73142	-1.32213	0.198385	0.522289	-5.47936
Hsd17b7	0.637339	2.98854	1.49713	0.147183	0.459106	-5.24993
Uap1	-0.268604	5.46341	-1.41712	0.169089	0.489797	-5.35781
Uhmk1	0.0322533	5.16503	0.156052	0.877276	0.948997	-6.31751
Sh2d1b1	1.24034	4.98763	3.32649	0.00278085	0.0520307	-1.7583
Nos1ap	-0.106441	4.95465	-0.621743	0.539877	0.777847	-6.13642
Olfml2b	0.632441	2.39765	1.86118	0.0748094	0.339821	-4.69985
Atf6	0.24538	6.97772	1.48172	0.151215	0.466767	-5.2711
Dusp12	0.654098	3.33652	1.36751	0.18393	0.505446	-5.42219
Fcgr2b	0.554656	7.02334	2.85943	0.00856095	0.104503	-2.79126
Fcgr4	0.833994	3.87938	2.01002	0.0556084	0.294728	-4.4492
Fcgr3	0.383815	7.44261	2.83369	0.00909363	0.107734	-2.84615
Cfap126	0.453111	1.91726	1.54013	0.136397	0.445987	-5.18994
Sdhc	-0.0700936	6.81862	-0.595565	0.55695	0.788962	-6.15224
Pcp4l1	1.32399	2.34216	3.98808	0.000529632	0.0186005	-0.210941
Tomm40l	0.749694	4.05474	2.13992	0.0425577	0.258153	-4.21941
Fcer1g	0.0581465	10.5662	0.425759	0.674016	0.853851	-6.23872
Ndufs2	0.017628	6.71331	0.11424	0.909983	0.962265	-6.3232
B4galt3	0.893391	4.47823	1.97196	0.0600524	0.306821	-4.51462
Ppox	0.0887775	3.54037	0.214855	0.831666	0.929192	-6.30652
Usp21	0.0771751	4.02373	0.205299	0.839042	0.932306	-6.30855
Ufc1	-0.0720781	7.21527	-0.61935	0.541426	0.779104	-6.13789
Gm20045	0.0472887	2.4114	0.117265	0.90761	0.961853	-6.32285
Dedd	-0.054571	3.81997	-0.15684	0.876661	0.948884	-6.31738
Nit1	0.526937	4.03906	1.51068	0.143713	0.454817	-5.23118
Pfdn2	-0.0658747	7.11465	-0.49653	0.623964	0.827635	-6.2061
Arhgap30	-0.0122817	7.19112	-0.0753949	0.940515	0.975683	-6.32691
Usf1	-0.187199	5.19339	-0.432173	0.669411	0.852535	-6.23596
F11r	1.94188	4.08835	4.32021	0.000226865	0.0111906	0.586347
B930036N10Rik	0.653513	3.61494	1.47477	0.153062	0.469313	-5.28059
Alyref2	-0.063335	4.02427	-0.222984	0.825404	0.925053	-6.30473
Cd244a	0.421941	5.6254	1.51314	0.143089	0.454302	-5.22776
Ly9	0.739816	4.68633	1.99704	0.0570897	0.298453	-4.4716
Slamf7	0.824842	2.32058	2.07523	0.0486685	0.276663	-4.33508
Cd48	0.312802	7.82544	2.34533	0.0274617	0.204297	-3.83677
Cd84	0.442497	6.44388	2.14422	0.0421768	0.257182	-4.21163
Slamf6	1.25186	2.24301	4.6594	9.51068e-05	0.00618023	1.40613
Ncstn	0.250563	5.35845	1.52773	0.139439	0.450086	-5.20738
Copa	0.0398888	6.80953	0.32794	0.745754	0.889881	-6.27567
Pex19	-0.18525	4.52047	-0.464228	0.646599	0.840548	-6.2216
Dcaf8	0.178007	5.95474	1.3754	0.181502	0.502356	-5.41207
Pea15a	0.836128	3.69279	2.08486	0.0477117	0.274241	-4.31802
Igsf8	0.570303	5.65664	1.26413	0.218124	0.541923	-5.54999
Pigm	0.138928	4.05256	0.360869	0.721303	0.876519	-6.26429
Tagln2	-0.0258832	9.53166	-0.181849	0.857204	0.940584	-6.31312
4933439K11Rik	0.954543	1.99501	3.9112	0.000643829	0.0206851	-0.394103
Slamf8	0.537857	2.61117	1.04075	0.308194	0.620735	-5.7957
Dusp23	1.08439	2.9484	2.88974	0.0079715	0.100706	-2.7263
Ackr1	-0.030712	2.43604	-0.0811193	0.936009	0.973623	-6.32646
Aim2	0.255774	6.8314	2.07397	0.0487951	0.276948	-4.33732
Ifi206	0.178417	2.1025	0.480211	0.635354	0.834236	-6.21405
Ifi214	0.285113	2.60345	0.645839	0.524411	0.767184	-6.12127
Ifi209	0.347538	6.57431	1.76501	0.0900757	0.371763	-4.85416
Ifi207	-0.17465	6.47959	-0.816035	0.422375	0.709439	-5.99861
Ifi204	0.356254	6.7382	1.49547	0.147613	0.460315	-5.25222
Mndal	0.13886	7.46672	0.790043	0.437113	0.717064	-6.0191
Ifi211	0.643496	5.9109	2.79769	0.00989185	0.112959	-2.92255
Ifi203	0.327566	7.38204	1.67222	0.107256	0.398748	-4.99708
Ifi205	0.123831	3.34073	0.251186	0.803773	0.915809	-6.29801
Spta1	0.148848	3.30298	0.32703	0.746434	0.890007	-6.27597
Fh1	0.0431439	5.6772	0.276474	0.784513	0.90774	-6.2913
Kmo	1.37301	3.27205	2.96835	0.00661734	0.0906709	-2.55635
Opn3	0.0261977	2.44776	0.0667437	0.94733	0.977849	-6.32753
Chml	0.391455	3.85171	0.856986	0.399791	0.693493	-5.96506
Exo1	0.00759291	4.9508	0.0372751	0.970569	0.987402	-6.32908
Cep170	0.0668057	6.08655	0.294182	0.771107	0.901441	-6.28622
Sdccag8	0.390805	6.37155	1.75434	0.0919243	0.374158	-4.8709
Akt3	0.190752	6.71574	0.926809	0.363103	0.664926	-5.9043
Zbtb18	0.70077	4.60177	1.81392	0.0820067	0.353852	-4.77645
Adss	0.076876	7.16363	0.479442	0.635893	0.834491	-6.21442
Desi2	0.510259	5.23842	1.26067	0.219351	0.543327	-5.55413
B230369F24Rik	0.0251862	2.17714	0.0787063	0.937908	0.974619	-6.32666
Cox20	0.198991	5.62255	0.60846	0.548505	0.783516	-6.14453
Hnrnpu	-0.0527118	9.16643	-0.487706	0.630112	0.830933	-6.21043
Efcab2	-0.143605	3.41334	-0.381887	0.705851	0.86837	-6.25646
Smyd3	0.356143	6.78286	2.79233	0.0100162	0.113497	-2.93388
Tfb2m	0.295428	4.67667	0.747461	0.461928	0.73264	-6.05131
Cnst	0.366358	4.37395	1.01652	0.319357	0.632365	-5.81977
Sccpdh	0.12713	2.12641	0.335913	0.739808	0.886919	-6.27301
Ahctf1	-0.149901	5.5562	-0.779936	0.442929	0.721157	-6.0269
Cdc42bpa	-0.297488	2.85683	-0.830893	0.414091	0.704013	-5.98662
Psen2	0.327429	4.96489	0.80226	0.430147	0.713041	-6.00955
Gm31728	0.285267	1.84749	1.04811	0.304859	0.618496	-5.78829
Itpkb	0.149342	5.06786	0.751025	0.45982	0.731559	-6.04868
Parp1	-0.0357386	6.79351	-0.181065	0.857812	0.940871	-6.31326
Lin9	0.0132987	5.30271	0.0474852	0.962513	0.984003	-6.32864
Acbd3	-0.00842906	6.5246	-0.0698005	0.944921	0.976835	-6.32732
H3f3a	-0.233994	10.9884	-1.84783	0.0767841	0.344384	-4.72163
Sde2	0.323151	4.96927	0.796529	0.433406	0.714777	-6.01405
Pycr2	0.149989	6.02895	0.931976	0.360479	0.663873	-5.89962
Tmem63a	0.206496	5.27664	0.944832	0.354007	0.659342	-5.88789
Nvl	-0.0357124	5.64643	-0.18613	0.853881	0.939355	-6.31232
Cnih4	-0.00601639	7.31518	-0.0430016	0.96605	0.985576	-6.32885
Wdr26	-0.277236	7.57981	-1.7585	0.0911998	0.372628	-4.86439
Lbr	0.377667	7.97941	2.62767	0.014639	0.142477	-3.27655
Srp9	-0.286346	7.97523	-2.22532	0.0355488	0.234942	-4.06309
Degs1	0.143178	6.81071	0.971213	0.340972	0.650293	-5.86336
Fbxo28	0.27322	5.1271	1.43394	0.164281	0.48445	-5.33555
Trp53bp2	0.556758	3.60273	1.39309	0.176155	0.497112	-5.38924
Capn2	0.154251	5.99435	0.75522	0.457345	0.730595	-6.04557
Tlr5	0.822613	2.47233	2.82684	0.00924068	0.108838	-2.86073
Disp1	0.610272	3.62126	1.50293	0.145689	0.456771	-5.24192
Brox	0.574856	5.01202	1.44652	0.160757	0.479926	-5.31875
Aida	-0.0902952	5.64852	-0.564987	0.57724	0.80105	-6.16988
Mia3	0.0839292	6.69707	0.64081	0.527619	0.770415	-6.12448
Taf1a	0.129277	3.07445	0.301856	0.76532	0.899008	-6.28392
Dusp10	1.19806	2.08363	4.39881	0.000185501	0.00986792	0.776008
Hlx	0.1965	3.51962	0.50449	0.618443	0.824766	-6.20212
Marc2	-0.143078	6.84445	-0.99785	0.328145	0.638818	-5.83795
Rab3gap2	0.812007	4.97296	2.09624	0.0466025	0.271305	-4.29777
Iars2	-0.150841	5.19142	-0.661273	0.514633	0.760561	-6.11128
Bpnt1	0.590316	3.11537	1.57139	0.12897	0.435736	-5.14546
Eprs	-0.162563	7.12212	-1.09837	0.282763	0.600329	-5.73642
Rrp15	-0.0661632	5.11684	-0.230346	0.819743	0.922404	-6.30305
Gpatch2	0.747798	4.31715	2.00942	0.0556757	0.294728	-4.45023
Kctd3	0.588152	3.59315	1.50967	0.143969	0.455495	-5.23258
Cenpf	-0.0482584	7.22974	-0.382978	0.705052	0.867794	-6.25604
Smyd2	-0.0486681	3.91831	-0.116655	0.908088	0.961996	-6.32292
Rps6kc1	1.65804	3.4793	4.4873	0.000147859	0.00859336	0.989829
Angel2	0.380277	5.15934	0.86314	0.396465	0.689936	-5.95988
Flvcr1	0.1351	4.3524	0.354858	0.725744	0.87968	-6.26645
Tatdn3	0.471643	3.14232	1.30536	0.203944	0.527778	-5.50006
Nsl1	0.154315	3.66876	0.427232	0.672957	0.853851	-6.23809
Batf3	-0.129833	2.60083	-0.318352	0.752927	0.892918	-6.27878
Atf3	-0.168978	3.82599	-0.457649	0.651254	0.843466	-6.22463
D730003I15Rik	0.206731	2.57052	0.632076	0.533215	0.773195	-6.12999
Nenf	0.0817674	4.86261	0.205521	0.83887	0.932306	-6.3085
Pacc1	0.706638	3.57606	1.77962	0.0875973	0.366746	-4.83112
Ppp2r5a	-0.0149358	8.3588	-0.137288	0.891929	0.954123	-6.32028
Dtl	-0.482153	6.13407	-2.38347	0.0252681	0.195584	-3.7633
Ints7	-0.143835	5.5213	-0.726125	0.47467	0.737809	-6.06681
Lpgat1	0.668282	5.95871	1.48899	0.149301	0.463804	-5.26113
Nek2	0.394217	3.88713	1.10549	0.279728	0.598534	-5.72889
Slc30a1	0.535374	3.50158	1.69153	0.103469	0.391531	-4.96784
Traf5	0.367743	4.19668	0.882361	0.386192	0.681899	-5.94349
Rcor3	0.619148	4.27418	1.6259	0.116819	0.415837	-5.06617
Utp25	-0.108694	3.82105	-0.288664	0.775277	0.903297	-6.28783
A130010J15Rik	-0.167232	2.43708	-0.491016	0.627802	0.829528	-6.20881
Traf3ip3	0.411081	5.71324	1.65633	0.11046	0.404556	-5.02095
Lamb3	1.86752	3.16843	5.31871	1.76495e-05	0.00232186	2.99664
Hsd11b1	0.0715796	5.03745	0.305257	0.762759	0.897968	-6.28288
G0s2	1.48446	3.30843	3.92583	0.000620376	0.0202781	-0.359309
Cd34	2.18759	4.45681	5.03522	3.63375e-05	0.00341002	2.31466
Cd46	1.16462	2.46689	3.51368	0.00174992	0.0388345	-1.32832
Cr1l	0.0370663	6.49903	0.297767	0.768402	0.900202	-6.28515
Nmt2	-0.81437	4.72647	-2.59152	0.015892	0.150133	-3.35029
Rpp38	-0.0556539	2.92299	-0.177174	0.860835	0.942045	-6.31396
Dclre1c	0.300995	5.09276	0.737947	0.467584	0.73558	-6.05828
Suv39h2	-0.117878	3.80121	-0.304283	0.763492	0.898474	-6.28318
Hspa14	0.0312354	6.55598	0.199629	0.843425	0.93425	-6.3097
Gm45902	0.703128	2.02329	2.67993	0.0129899	0.131498	-3.16897
Cdnf	0.569148	2.03836	1.79034	0.0858157	0.362819	-4.81412
Fam107b	0.0360308	8.09471	0.268177	0.790817	0.911442	-6.29357
Frmd4a	0.798161	5.36379	3.69894	0.00110068	0.0293478	-0.89601
Prpf18	-0.254316	5.4287	-1.0267	0.31463	0.627441	-5.80971
Sephs1	-0.210943	5.02414	-1.04882	0.304539	0.618232	-5.78758
Phyh	0.436112	5.49757	2.37985	0.0254689	0.196299	-3.77029
Mcm10	-0.301411	5.64136	-1.43725	0.163347	0.483432	-5.33114
Optn	0.59963	2.9639	2.02771	0.0536444	0.291492	-4.4185
Camk1d	0.560841	8.26834	2.37196	0.0259125	0.19887	-3.78555
Cdc123	-0.076207	6.97289	-0.491422	0.627519	0.829392	-6.20862
Nudt5	0.357393	6.0127	0.734496	0.469647	0.736185	-6.06078
Sec61a2	-0.30402	3.1121	-0.691267	0.495922	0.750488	-6.09121
Upf2	0.529948	5.50005	1.25049	0.222979	0.546717	-5.56621
Usp6nl	0.0474516	4.43669	0.181401	0.857551	0.940775	-6.3132
Celf2	0.123405	8.8473	1.44186	0.162055	0.481979	-5.32499
Taf3	0.0951044	6.04661	0.60773	0.548981	0.783681	-6.14497
Atp5c1	-0.183079	8.60614	-2.09907	0.0463305	0.270748	-4.29273
Kin	-0.137107	5.8433	-0.940648	0.356105	0.660703	-5.89173
Itih5	1.08011	2.36562	3.07131	0.0051729	0.0785123	-2.33071
Sfmbt2	1.70631	3.83556	3.98023	0.000540305	0.0187329	-0.229666
Pfkfb3	0.294912	5.26841	1.30271	0.204834	0.528354	-5.50331
Rbm17	-0.200212	6.57605	-1.6653	0.108642	0.402189	-5.0075
Il15ra	1.08155	3.74273	2.37428	0.0257814	0.198144	-3.78106
Fbh1	0.520972	4.52096	1.37438	0.181815	0.502356	-5.41339
Ankrd16	0.636603	3.46096	1.35578	0.187584	0.510784	-5.43712
Itga8	1.68524	3.27984	3.32307	0.00280437	0.0522905	-1.7661
Mindy3	0.202828	6.20387	1.14094	0.264968	0.582951	-5.69077
Pter	1.09917	3.20383	2.80143	0.00980588	0.1126	-2.91463
Rsu1	0.359053	7.24648	2.53982	0.0178591	0.160789	-3.45478
Trdmt1	0.506174	3.59335	1.53091	0.138655	0.449293	-5.20293
Vim	-0.0496811	10.6436	-0.399114	0.693281	0.862587	-6.24972
Hacd1	0.106587	5.00812	0.326963	0.746484	0.890007	-6.27599
Stam	0.72014	4.7206	1.86645	0.074042	0.338692	-4.69122
Mrc1	-0.541264	2.6908	-0.982888	0.335309	0.646432	-5.8523
Cacnb2	1.3821	4.40137	2.76049	0.0107858	0.117754	-3.00097
Nsun6	0.521187	3.69999	1.11408	0.276098	0.594593	-5.71975
Arl5b	0.129554	4.05466	0.480928	0.634852	0.834069	-6.21371
Mllt10	-0.0256629	7.2394	-0.22942	0.820455	0.922731	-6.30327
Dnajc1	0.384938	6.31081	2.75581	0.0109038	0.118803	-3.01081
Commd3	-0.34415	6.53832	-1.94204	0.0637617	0.31626	-4.56541
Bmi1	-0.236855	3.44454	-0.618015	0.542291	0.779311	-6.13871
Pip4k2a	-0.295216	8.24215	-1.81398	0.0819967	0.353852	-4.77635
Armc3	1.0639	3.34878	2.42806	0.0229086	0.184974	-3.6765
Msrb2	0.560493	3.43358	1.54304	0.135692	0.44595	-5.18583
Otud1	0.416223	2.02591	1.31922	0.199343	0.52316	-5.48297
Arhgap21	-0.114614	5.09961	-0.522558	0.605994	0.818152	-6.19287
Thnsl1	0.653349	1.99391	2.15484	0.0412503	0.254635	-4.1924
Apbb1ip	-0.0259797	8.51975	-0.190401	0.85057	0.937554	-6.31151
Pdss1	0.759797	5.14503	1.93168	0.0650928	0.319054	-4.58287
Abi1	0.0845018	7.14007	0.638086	0.529361	0.770817	-6.12621
Acbd5	0.875148	5.57973	2.07821	0.0483707	0.27605	-4.32981
Mastl	-0.177189	5.11397	-0.866579	0.394614	0.688499	-5.95697
Yme1l1	-0.0173004	6.27761	-0.139405	0.890275	0.953582	-6.31998
Spopl	0.958123	4.772	2.39783	0.0244846	0.192141	-3.73544
Hnmt	2.48244	4.25559	5.7387	6.11314e-06	0.00135387	3.997
Il1f9	1.00567	3.39789	2.04678	0.0515956	0.285423	-4.38518
Il1rn	2.14526	3.77664	5.15816	2.65534e-05	0.00298919	2.61093
Psd4	0.164305	5.13081	0.736602	0.468388	0.735868	-6.05926
Ehmt1	-0.363019	6.50089	-2.29623	0.0305419	0.215501	-3.93027
Arrdc1	-0.129686	4.89574	-0.681061	0.502245	0.754729	-6.09814
Zmynd19	-0.676902	5.00372	-2.78866	0.0101021	0.11384	-2.94163
Dph7	0.715686	3.29465	2.19032	0.0382842	0.24535	-4.12764
Mrpl41	0.0066817	5.71165	0.038665	0.969472	0.987304	-6.32903
Pnpla7	0.147616	4.59094	0.746735	0.462359	0.73264	-6.05185
Nsmf	-0.0963157	1.98727	-0.297382	0.768692	0.900202	-6.28527
Tor4a	0.328601	3.15701	1.08512	0.288475	0.605402	-5.75031
Nelfb	-0.192167	4.9114	-0.829303	0.414972	0.704689	-5.98791
Tubb4b	-0.030599	8.48166	-0.15271	0.879883	0.949815	-6.31803
Ndor1	0.660357	3.01143	1.57397	0.128373	0.434937	-5.14176
Tmem203	0.691901	3.75925	2.09267	0.046948	0.272176	-4.30413
Tprn	-0.1813	3.09418	-0.535391	0.597226	0.812473	-6.1861
Ssna1	-0.0706994	7.06407	-0.630142	0.534459	0.773869	-6.1312
Anapc2	0.336463	4.63235	0.7774	0.444395	0.72149	-6.02884
Man1b1	-0.085754	3.66281	-0.206066	0.838449	0.932306	-6.30839
Dpp7	-0.15508	3.08418	-0.413562	0.682807	0.857718	-6.24384
Uap1l1	-0.378353	4.4634	-1.53925	0.136613	0.446237	-5.19119
Sapcd2	-0.146569	2.58755	-0.430083	0.67091	0.853342	-6.23687
Fut7	1.24999	3.43865	3.58351	0.00147014	0.0345324	-1.16608
Abca2	-0.404809	3.26746	-1.28099	0.212239	0.535757	-5.52975
Paxx	0.888585	3.44574	2.37209	0.0259053	0.19887	-3.7853
Fbxw5	0.641946	3.65453	1.82204	0.0807297	0.351557	-4.7634
Traf2	0.108885	3.62498	0.292014	0.772745	0.902478	-6.28686
Edf1	0.0989964	7.59351	0.865356	0.395272	0.689189	-5.95801
Phpt1	0.73008	3.30357	2.01655	0.0548763	0.294253	-4.43789
Rabl6	0.505368	5.42	1.20352	0.240322	0.562428	-5.62085
Tmem141	0.349432	3.99465	0.976108	0.338589	0.649113	-5.85873
Bmyc	0.466484	4.60299	1.11308	0.276521	0.595044	-5.72083
Camsap1	-0.525319	3.65049	-1.959	0.0616345	0.310932	-4.53668
Ubac1	0.408098	5.33581	0.956404	0.348249	0.654973	-5.87721
Tmem250-ps	0.129148	3.28445	0.321643	0.750462	0.891692	-6.27772
Qsox2	0.648873	2.62197	1.70909	0.100124	0.386529	-4.94101
Dnlz	0.382307	3.76561	1.1032	0.280701	0.598932	-5.73132
Card9	-0.0489599	5.40588	-0.222366	0.825879	0.925394	-6.30487
Snapc4	0.17761	2.63694	0.499402	0.62197	0.826753	-6.20467
Entr1	-0.344561	5.5346	-2.10686	0.0455889	0.268994	-4.27883
Pmpca	0.15333	4.782	0.725815	0.474857	0.737809	-6.06704
Inpp5e	0.1103	2.00761	0.369785	0.714733	0.873436	-6.26102
Sec16a	0.365322	4.96392	0.941936	0.355458	0.660094	-5.89055
Notch1	0.183954	5.53438	0.419457	0.678552	0.856415	-6.24138
Egfl7	0.0961975	3.47102	0.20053	0.842728	0.93405	-6.30952
Agpat2	0.364128	4.89298	1.22693	0.231554	0.55483	-5.59384
Surf6	-0.220669	3.88067	-0.697111	0.492322	0.748176	-6.0872
Med22	0.250186	3.26095	0.630118	0.534474	0.773869	-6.13122
Rpl7a	-0.141529	10.4324	-1.54908	0.134235	0.444176	-5.17728
Surf1	0.394434	4.64571	0.98775	0.332969	0.644759	-5.84766
Surf2	0.136103	4.04929	0.361539	0.720808	0.876298	-6.26405
Surf4	0.631689	6.70759	1.23346	0.229155	0.552989	-5.58624
Rexo4	0.244393	4.88458	0.63781	0.529538	0.77083	-6.12638
Cacfd1	0.0877373	3.32501	0.251106	0.803834	0.915809	-6.29803
Slc2a6	0.0345928	4.1782	0.103513	0.918402	0.966401	-6.32438
Vav2	-0.627793	3.15327	-1.48472	0.150422	0.465753	-5.26699
Brd3	0.344679	5.81154	1.96299	0.061143	0.310058	-4.52989
Wdr5	0.0537729	5.12605	0.232776	0.817877	0.921566	-6.30249
Rxra	-0.391025	2.77451	-0.890974	0.381644	0.679005	-5.93603
Fcnb	1.30617	7.1632	4.01972	0.000488669	0.0176465	-0.135373
F730016J06Rik	2.46128	4.41688	5.51745	1.06688e-05	0.00172803	3.47178
Olfm1	-0.244176	6.02063	-1.06168	0.298778	0.612691	-5.77451
Gm13373	1.21163	2.6157	3.57426	0.00150454	0.0349621	-1.18764
Mrps2	1.10122	3.36815	2.47045	0.020855	0.175577	-3.59307
Ralgds	-0.64335	2.11218	-1.84389	0.0773768	0.34598	-4.72805
Gtf3c5	-0.144462	3.36946	-0.397483	0.694467	0.863082	-6.25037
Gfi1b	0.937285	3.39484	2.08782	0.0474214	0.273878	-4.31277
Tsc1	-0.0263133	4.16087	-0.0701018	0.944684	0.976827	-6.3273
Spaca9	0.521981	3.87205	1.42809	0.16594	0.486165	-5.34331
Ak8	0.818421	3.19116	1.91236	0.067638	0.323636	-4.61523
Gtf3c4	0.0481757	3.77366	0.120163	0.905338	0.960557	-6.3225
Ddx31	-0.0366963	3.86953	-0.0766709	0.939511	0.975279	-6.32682
Ttf1	0.719342	4.70778	1.99579	0.0572344	0.298753	-4.47376
Setx	0.333451	6.20099	1.94016	0.0640008	0.316851	-4.56857
Ntng2	0.962257	3.40864	2.22977	0.0352135	0.23336	-4.05482
6530402F18Rik	0.772585	3.08522	1.95718	0.0618598	0.310932	-4.53977
Med27	0.124885	5.32026	0.529804	0.601036	0.813779	-6.18907
Rapgef1	0.261336	5.49107	0.596238	0.556508	0.788797	-6.15184
Trub2	0.0295043	4.23957	0.117014	0.907806	0.961968	-6.32288
Coq4	0.49178	3.09215	1.32218	0.198368	0.522289	-5.47929
Slc27a4	0.367027	2.20827	1.107	0.279089	0.598534	-5.72729
Urm1	-0.26418	4.83762	-1.08672	0.28778	0.604948	-5.74864
Cercam	0.282207	2.30346	0.745528	0.463074	0.732885	-6.05274
Odf2	0.626127	5.69122	1.46005	0.157033	0.474777	-5.30055
Gle1	-0.0311094	4.95635	-0.142126	0.888148	0.95286	-6.3196
Sptan1	-0.0169985	6.0914	-0.112724	0.911172	0.962339	-6.32337
Set	0.0324039	9.5442	0.179259	0.859214	0.941458	-6.31359
Pkn3	0.676353	2.30808	2.02643	0.0537841	0.291687	-4.42072
Zdhhc12	0.779883	4.31172	2.15881	0.0409082	0.253388	-4.18519
Zer1	0.51378	2.92998	1.33874	0.192995	0.517635	-5.45862
Tbc1d13	0.0992657	3.83857	0.239858	0.812444	0.919178	-6.3008
Endog	-0.763604	3.81662	-1.83854	0.0781867	0.347881	-4.73674
Spout1	0.150599	3.72245	0.413	0.683213	0.85793	-6.24407
Lrrc8a	0.724171	2.63356	2.0972	0.0465103	0.271305	-4.29607
Dolk	0.601321	2.43624	1.61862	0.118383	0.418875	-5.07687
Nup188	-0.223299	5.01986	-1.32387	0.197814	0.521798	-5.47719
Sh3glb2	0.223896	3.49419	0.653263	0.519695	0.763392	-6.11649
Miga2	0.465515	2.51818	1.43761	0.163246	0.483432	-5.33066
Dolpp1	0.33081	3.58799	0.946814	0.353016	0.658915	-5.88607
Crat	-0.712015	3.7673	-2.64587	0.0140435	0.139051	-3.23921
Ptpa	-0.199684	6.40445	-1.40702	0.172032	0.493687	-5.37108
Ntmt1	-0.286132	4.21937	-1.12502	0.271526	0.591109	-5.70803
Asb6	0.0632275	3.04991	0.153334	0.879396	0.949573	-6.31793
Ptges	1.5516	2.88186	4.3577	0.000206098	0.0105999	0.676786
Tor1b	0.58174	5.23416	1.47678	0.152526	0.468368	-5.27785
Tor1a	0.716221	7.03647	1.32712	0.196753	0.521534	-5.47315
BC005624	0.327861	5.82734	2.06129	0.0500836	0.280469	-4.35969
Usp20	-0.354439	2.25294	-1.14648	0.262714	0.580882	-5.68471
Fnbp1	0.0132154	7.16377	0.0987937	0.922109	0.968171	-6.32486
D330023K18Rik	0.0352315	2.122	0.0987604	0.922135	0.968171	-6.32486
Gpr107	0.315249	4.44031	0.754176	0.45796	0.730967	-6.04635
Ass1	0.448846	7.47203	3.22277	0.00358476	0.0606893	-1.99307
Fubp3	0.780171	3.25962	2.22789	0.0353546	0.233944	-4.05831
Exosc2	-0.336578	4.00111	-1.22828	0.231059	0.55483	-5.59228
Abl1	0.487383	5.08961	1.1517	0.260604	0.579724	-5.67898
Nup214	-0.0850469	6.00114	-0.482625	0.633663	0.833262	-6.21289
Fam78a	-0.0163522	3.52405	-0.0470205	0.96288	0.984044	-6.32867
Prrc2b	-0.147292	4.95162	-0.352164	0.727738	0.88075	-6.2674
Pomt1	-0.186666	3.0108	-0.425898	0.673915	0.853851	-6.23866
Uck1	-0.346683	3.99639	-0.927171	0.362918	0.664926	-5.90397
Swi5	-0.108297	8.11699	-0.797669	0.432757	0.714466	-6.01316
Golga2	0.399545	4.76745	1.03645	0.310156	0.623415	-5.80001
Ciz1	0.256504	4.53478	1.0263	0.314819	0.627441	-5.81012
1110008P14Rik	0.947053	5.68981	1.92733	0.065658	0.320234	-4.59017
Lcn2	0.902993	8.96253	3.15172	0.0042604	0.0683681	-2.15226
Ptges2	0.0730013	3.68859	0.203914	0.840112	0.932866	-6.30883
Slc25a25	0.333283	3.85539	0.87217	0.391617	0.68612	-5.95222
Naif1	0.914669	2.09747	2.93676	0.0071328	0.0945766	-2.62489
Fam102a	1.65183	3.21128	4.53255	0.000131663	0.00798216	1.09924
Dpm2	0.393015	5.10709	0.964227	0.344391	0.652391	-5.86991
St6galnac4	0.452243	3.8408	1.26791	0.216796	0.540555	-5.54548
St6galnac6	0.171967	3.75634	0.393932	0.697053	0.86362	-6.25178
Eng	2.04394	2.97129	6.07271	2.65893e-06	0.00082442	4.78097
Fpgs	-0.101212	2.86524	-0.230403	0.819699	0.922404	-6.30304
Cdk9	0.0323666	6.94788	0.200628	0.842652	0.93405	-6.3095
Sh2d3c	0.735702	4.39921	1.99769	0.0570149	0.298453	-4.47048
Tor2a	0.151291	4.56791	0.403313	0.69023	0.862244	-6.24803
Fam129b	-0.0162324	5.02283	-0.0944162	0.92555	0.96937	-6.32529
Lrsam1	0.573238	2.12126	1.95782	0.0617809	0.310932	-4.53869
Rpl12	-0.0810727	10.4356	-0.656979	0.517344	0.761776	-6.11408
Slc2a8	-0.556024	2.24946	-1.34639	0.19055	0.514993	-5.449
Ralgps1	0.409058	3.27621	1.08827	0.287107	0.604528	-5.74702
Zbtb34	0.509734	4.07906	1.36377	0.18509	0.506965	-5.42696
Zbtb43	0.636479	3.73767	1.79801	0.0845612	0.360083	-4.80191
Mvb12b	0.0565712	5.34224	0.362382	0.720186	0.875976	-6.26374
Pbx3	0.00119836	6.09168	0.00555844	0.99561	0.997944	-6.32977
Mapkap1	-0.0506215	6.3718	-0.38937	0.70038	0.865466	-6.25357
Gapvd1	-0.157525	6.38906	-1.03407	0.311244	0.624354	-5.80239
Hspa5	0.0264376	9.55281	0.16402	0.871067	0.947323	-6.31622
Rabepk	0.211958	4.39287	0.895167	0.379443	0.677866	-5.93238
Fbxw2	-0.0479926	5.83023	-0.25086	0.804023	0.915809	-6.29809
Psmd5	0.0599526	5.60475	0.274362	0.786116	0.908776	-6.29188
Phf19	0.239165	3.27267	0.607837	0.548912	0.783681	-6.14491
Traf1	0.409465	1.95584	1.21241	0.236964	0.55896	-5.61065
Cntrl	0.14877	7.06962	0.662661	0.513759	0.759994	-6.11037
Rab14	0.0588899	7.75162	0.509753	0.614804	0.822772	-6.19946
Gsn	0.490352	6.38993	2.13114	0.0433442	0.260858	-4.23525
Stom	0.815899	5.64891	2.67895	0.0130192	0.131672	-3.171
Ggta1	0.0662817	6.09917	0.490112	0.628432	0.829908	-6.20926
Dab2ip	0.973464	2.45089	3.17044	0.00407129	0.0661402	-2.11044
Ndufa8	0.0190148	7.76226	0.160328	0.873943	0.948041	-6.31683
Rbm18	0.312422	3.99838	0.790993	0.436569	0.716957	-6.01837
Mrrf	0.538864	3.88157	1.47848	0.152074	0.468039	-5.27553
Ptgs1	1.15692	4.10727	2.52346	0.0185272	0.164182	-3.48759
Pdcl	0.390465	4.15352	1.00663	0.32399	0.635285	-5.82943
Rc3h2	0.146081	5.29766	0.674025	0.506631	0.757294	-6.10285
Zbtb6	1.21462	3.20055	2.90459	0.00769696	0.0983735	-2.69435
Zbtb26	0.626975	2.04253	2.27893	0.0317003	0.219996	-3.96292
Rabgap1	-0.188209	5.58696	-0.916261	0.368497	0.668313	-5.91376
Strbp	0.564278	5.34513	1.26534	0.2177	0.54148	-5.54855
Dennd1a	0.293644	7.74659	1.99613	0.0571955	0.298694	-4.47318
Nek6	0.63405	3.36222	1.66347	0.109011	0.402625	-5.01025
Psmb7	0.088115	6.87477	0.652484	0.520189	0.763676	-6.117
Nr6a1	0.161038	3.28985	0.396959	0.694848	0.863082	-6.25058
Nr6a1os	1.3164	2.9418	3.27733	0.00313738	0.0561829	-1.86992
Rpl35	-0.0512745	9.21909	-0.226429	0.822754	0.92383	-6.30395
Arpc5l	-0.123316	6.85469	-0.858176	0.399146	0.693046	-5.96406
Golga1	-0.0576823	4.88613	-0.279898	0.781915	0.906553	-6.29034
Scai	0.365005	3.91609	0.99657	0.328754	0.639133	-5.83918
Ppp6c	0.0740694	5.96241	0.501588	0.620453	0.825749	-6.20358
Kynu	1.6141	4.7838	4.21342	0.000298141	0.0130461	0.329121
Arhgap15	0.36789	9.90069	3.17715	0.00400554	0.06546	-2.09543
Gtdc1	0.113326	5.54336	0.548982	0.588007	0.807942	-6.17876
Zeb2	-0.0401046	10.011	-0.245084	0.808441	0.917794	-6.29953
Zeb2os	0.243109	5.90704	1.47858	0.152047	0.468039	-5.27539
Acvr2a	0.259945	3.84151	0.539771	0.594247	0.81035	-6.18375
Orc4	0.192663	5.42852	1.0591	0.299926	0.613996	-5.77714
Mbd5	0.142333	6.51849	0.866322	0.394752	0.688605	-5.95719
Epc2	0.292825	5.97324	1.68118	0.105486	0.394735	-4.98355
Mmadhc	0.267261	5.67836	1.58732	0.125315	0.430073	-5.12251
Rnd3	-0.295694	6.08693	-1.33275	0.194927	0.519232	-5.46613
Rbm43	0.382637	5.62267	2.2118	0.0365832	0.238726	-4.08809
Nmi	0.391457	6.00072	2.04516	0.0517663	0.285597	-4.38801
Tnfaip6	1.54237	2.38959	4.87442	5.48207e-05	0.00440766	1.92628
Rif1	-0.305559	7.07336	-2.21531	0.0363122	0.237301	-4.08162
Arl5a	0.56453	5.64185	3.66553	0.00119708	0.0310414	-0.974415
Stam2	0.0362201	5.45414	0.164741	0.870505	0.947323	-6.3161
Fmnl2	-0.126279	3.48998	-0.255795	0.800253	0.914142	-6.29683
Prpf40a	0.0427364	8.14888	0.481219	0.634648	0.833992	-6.21357
Arl6ip6	0.0180726	5.85493	0.104985	0.917246	0.96584	-6.32422
Nr4a2	0.119174	3.37602	0.236576	0.814961	0.919567	-6.30159
Gpd2	0.18256	5.67154	0.709349	0.484831	0.742715	-6.0787
Cytip	-0.230413	7.98544	-1.53833	0.136837	0.446395	-5.19249
Acvr1	0.885718	3.67442	2.20474	0.0371344	0.24073	-4.10112
Upp2	0.993168	2.71559	2.79748	0.00989666	0.112959	-2.92299
Pkp4	-0.175574	4.16022	-0.448273	0.657911	0.846586	-6.22887
Tanc1	0.94703	2.306	2.92856	0.00727268	0.0953178	-2.64262
Wdsub1	0.318479	3.16889	0.850548	0.40329	0.69634	-5.97043
Baz2b	0.394011	7.94788	2.98858	0.00630609	0.0880742	-2.51228
March7	-0.051666	6.23013	-0.334757	0.740669	0.887352	-6.2734
Cd302	0.543614	6.99683	2.59026	0.0159374	0.150133	-3.35285
Ly75	1.19263	3.92584	2.8552	0.00864645	0.104839	-2.8003
Rbms1	-0.0666314	8.15126	-0.560783	0.580059	0.803007	-6.17224
Tank	0.2129	6.60891	1.4012	0.173745	0.495324	-5.37868
Psmd14	-0.13592	7.86035	-1.25689	0.220693	0.544804	-5.55862
Dpp4	1.03946	4.71406	2.2877	0.0311081	0.218078	-3.94638
Fap	0.716615	1.97481	2.36661	0.026217	0.200216	-3.79586
Ifih1	0.782017	5.65299	3.59306	0.00143547	0.0340636	-1.14384
Gca	2.11793	4.2649	4.42776	0.000172236	0.0094047	0.84594
Grb14	0.343094	2.61708	0.805548	0.428284	0.712496	-6.00696
Cobll1	1.19227	3.11605	3.62887	0.00131235	0.0326642	-1.06021
Galnt3	1.01624	4.40493	2.96076	0.00673785	0.0918582	-2.57285
Ttc21b	1.12174	3.40102	2.74927	0.0110701	0.120133	-3.02452
Cers6	-0.0475979	8.69217	-0.355608	0.72519	0.879471	-6.26618
Nostrin	0.228821	4.87495	0.902705	0.375508	0.675006	-5.92577
Spc25	0.52544	5.62156	1.13177	0.268729	0.587954	-5.70073
Dhrs9	1.04406	2.77221	2.22592	0.0355033	0.234785	-4.06198
Fastkd1	0.436813	3.77329	1.31064	0.202182	0.526177	-5.49357
Ppig	-0.00963653	7.32567	-0.0778546	0.938579	0.974778	-6.32672
Ccdc173	0.581614	1.92372	1.72974	0.0963083	0.380202	-4.9092
Phospho2	0.0454141	4.31122	0.175234	0.862342	0.9426	-6.31431
Klhl23	1.2594	3.70486	3.12696	0.00452343	0.0714262	-2.2074
Ssb	-0.165702	8.28359	-1.28626	0.210424	0.534456	-5.52337
Mettl5	-0.129338	4.69337	-0.369534	0.714918	0.873436	-6.26112
Mettl5os	0.266693	1.96817	0.956513	0.348195	0.654973	-5.87711
Ubr3	0.169355	6.27406	1.01722	0.319031	0.632005	-5.81908
Gorasp2	0.0261739	6.28606	0.21105	0.834601	0.930602	-6.30734
Tlk1	0.220846	6.57517	1.82325	0.080541	0.351348	-4.76145
Mettl8	0.738871	3.46573	1.7915	0.0856251	0.362687	-4.81228
Dcaf17	0.00988399	4.90953	0.0421145	0.96675	0.986012	-6.32889
Dync1i2	0.292997	6.51149	1.83328	0.0789894	0.349859	-4.74525
Slc25a12	0.533233	6.56268	3.57767	0.00149176	0.0348893	-1.17969
Hat1	-0.278985	6.95007	-1.53282	0.138185	0.448559	-5.20025
Metap1d	0.352275	4.39129	0.931664	0.360637	0.663873	-5.89991
Itga6	0.95916	4.6783	3.83198	0.000786906	0.0238534	-0.582136
Pdk1	0.126753	3.81216	0.395539	0.695882	0.863561	-6.25114
Rapgef4	1.66132	2.23891	6.96878	3.02254e-07	0.000305741	6.81817
Map3k20	0.827476	6.80998	4.19719	0.000310763	0.0135115	0.290107
Cdca7	0.10085	6.53599	0.428373	0.672137	0.853851	-6.2376
Sp3	0.0159991	7.06369	0.0918504	0.927567	0.970212	-6.32553
Gm11084	0.61366	3.02891	1.47562	0.152835	0.468919	-5.27943
Sp3os	-0.17777	4.59406	-0.493373	0.626161	0.828774	-6.20766
Ola1	0.11073	7.24125	0.440968	0.663118	0.849658	-6.23212
Cir1	0.38642	5.09815	1.53597	0.137413	0.447137	-5.19581
Scrn3	0.881973	3.04656	2.45612	0.0215296	0.179584	-3.62138
Gpr155	0.199793	2.42715	0.654629	0.51883	0.762874	-6.11561
Wipf1	0.132054	7.87316	0.954319	0.349281	0.655552	-5.87914
Atf2	0.694121	5.59619	1.62185	0.117687	0.417284	-5.07213
Atp5g3	-0.0456578	8.47752	-0.347303	0.731341	0.882109	-6.26911
Lnpk	0.289796	5.49267	1.49232	0.148431	0.46207	-5.25656
Mtx2	0.264289	5.78352	1.14838	0.261943	0.580455	-5.68263
Hnrnpa3	-0.116373	9.56621	-1.35911	0.186542	0.50925	-5.4329
Nfe2l2	0.115074	7.35405	0.73553	0.469028	0.735878	-6.06003
Agps	0.464788	7.61397	3.99012	0.000526899	0.0185646	-0.206085
Ttc30a1	0.011945	2.17115	0.0393134	0.96896	0.987091	-6.329
Rbm45	1.16342	3.67776	3.21875	0.00362007	0.0610964	-2.00211
Prkra	0.482149	4.34979	1.28586	0.210561	0.534568	-5.52385
Fkbp7	0.88937	2.57814	2.34251	0.0276307	0.204675	-3.84218
Plekha3	0.481025	5.07703	1.80259	0.0838183	0.358391	-4.7946
Sestd1	0.241807	4.89096	1.12346	0.272173	0.591206	-5.7097
Cwc22	0.190559	5.33092	0.443101	0.661596	0.848285	-6.23118
Ube2e3	0.301768	6.27999	1.55241	0.133438	0.443242	-5.17255
Itga4	-0.0732457	8.21554	-0.497137	0.623542	0.827635	-6.2058
Cerkl	1.44373	3.10757	3.60442	0.00139524	0.0336119	-1.11734
Itprid2	0.452397	4.59695	1.05444	0.302013	0.615746	-5.78189
Dnajc10	1.12554	6.84464	2.23015	0.0351852	0.23336	-4.05412
Nckap1	-0.124678	2.05113	-0.425691	0.674064	0.853851	-6.23875
Dusp19	-0.33526	3.84502	-1.01909	0.318156	0.631194	-5.81723
Nup35	0.472817	4.89334	1.18102	0.24898	0.570148	-5.64638
Zc3h15	-0.188544	6.89408	-1.29457	0.207586	0.530603	-5.51327
Itgav	0.317283	4.89219	0.75027	0.460266	0.73184	-6.04924
Calcrl	0.78203	5.07806	3.77517	0.000908351	0.0261029	-0.716467
Tfpi	0.440607	3.41209	1.0061	0.324239	0.635285	-5.82995
Gm13710	1.70687	2.38114	6.20233	1.93054e-06	0.000675814	5.08193
Ctnnd1	0.918516	5.72114	3.01091	0.00597874	0.0854059	-2.46347
Selenoh	-0.0811282	7.83844	-0.378783	0.708125	0.869492	-6.25765
Tmx2	0.700444	4.31963	1.91284	0.0675747	0.323619	-4.61444
Med19	0.145939	5.04214	0.341499	0.735651	0.884183	-6.27111
Zdhhc5	0.0693928	5.59911	0.376637	0.709699	0.87068	-6.25846
Clp1	0.239468	4.44682	0.929914	0.361524	0.664449	-5.90149
Ube2l6	0.674443	5.43306	3.01953	0.00585674	0.0844055	-2.44459
Timm10	-0.270767	5.05736	-0.998915	0.327639	0.638338	-5.83692
Slc43a1	0.612326	2.67831	1.38431	0.178795	0.499814	-5.40061
Slc43a3	0.401003	5.94286	2.07143	0.0490509	0.277674	-4.34181
Ssrp1	0.121233	7.40085	0.77724	0.444487	0.72149	-6.02897
Tnks1bp1	0.622254	1.83385	2.41661	0.0234943	0.187807	-3.69888
Ptprj	-0.152634	7.38845	-0.726687	0.474332	0.737809	-6.06641
Nup160	0.25116	5.30951	0.593232	0.558485	0.79018	-6.15362
Fnbp4	0.00265525	6.60903	0.0180894	0.985715	0.994517	-6.32962
Mtch2	-0.202899	7.16006	-1.70499	0.100897	0.387723	-4.94729
Ndufs3	0.441915	6.1516	0.932155	0.360388	0.663873	-5.89946
Kbtbd4	-0.0188757	3.16838	-0.0591605	0.953306	0.979945	-6.32802
Ptpmt1	-0.467348	5.43722	-2.71461	0.0119938	0.125392	-3.09698
Celf1	0.138308	6.61874	0.722747	0.476706	0.738292	-6.06923
Rapsn	0.172304	2.50816	0.455293	0.652924	0.844823	-6.2257
Psmc3	0.00710249	7.47489	0.0502745	0.960313	0.983421	-6.32851
Slc39a13	0.293346	2.92903	0.856837	0.399872	0.693493	-5.96518
Spi1	0.0469347	8.80846	0.368859	0.715414	0.873697	-6.26137
Madd	-0.312671	4.63322	-1.68456	0.104824	0.393888	-4.97843
Acp2	0.167153	4.12376	0.590984	0.559966	0.790524	-6.15494
Ddb2	0.532294	2.93654	1.27126	0.215619	0.539397	-5.54146
Arfgap2	0.532262	4.4966	1.44182	0.162066	0.481979	-5.32504
1110051M20Rik	1.21043	3.49071	3.30322	0.00294443	0.0542495	-1.81121
Lrp4	0.869486	1.9379	3.36952	0.00250131	0.0491743	-1.66014
Ckap5	0.129823	7.45905	0.916996	0.36812	0.668144	-5.9131
Zfp408	-0.102382	2.98655	-0.337647	0.738517	0.885861	-6.27243
Arhgap1	-0.0364263	5.33101	-0.161634	0.872925	0.947994	-6.31661
Atg13	0.119534	4.33046	0.331678	0.742964	0.888601	-6.27443
Harbi1	0.0897672	2.64822	0.234394	0.816635	0.920836	-6.30211
Ambra1	0.17296	6.45708	1.13801	0.266165	0.584346	-5.69396
Dgkz	-0.171197	6.00717	-0.897867	0.378031	0.676937	-5.93002
Creb3l1	1.39484	3.35492	3.47968	0.00190432	0.0413424	-1.40697
Phf21a	0.528327	6.75338	2.07986	0.0482068	0.275627	-4.32689
Pex16	0.163698	3.65583	0.460776	0.64904	0.842408	-6.22319
Cry2	0.388432	2.96718	1.20624	0.23929	0.561343	-5.61774
Slc35c1	0.184182	4.88408	0.458012	0.650996	0.84343	-6.22446
Gm13814	-0.240593	3.95807	-0.72806	0.473506	0.737809	-6.06543
Prdm11	0.079611	2.30488	0.222672	0.825644	0.925226	-6.3048
Cd82	0.868056	5.05222	3.43039	0.00215201	0.0449108	-1.52059
Ext2	0.243424	4.56201	0.670259	0.508987	0.758651	-6.10536
Accs	0.459974	3.25418	1.24243	0.225885	0.549619	-5.57571
Alkbh3	0.379825	4.56764	1.00864	0.323043	0.635158	-5.82747
Hsd17b12	-0.0108888	6.66062	-0.0818433	0.935439	0.97342	-6.3264
Ttc17	-0.186165	5.86932	-1.4	0.174099	0.495584	-5.38024
2810002D19Rik	0.511677	2.12784	1.4155	0.169559	0.489797	-5.35994
Api5	-0.11402	6.98029	-1.14828	0.261986	0.580455	-5.68274
B230118H07Rik	1.05713	4.75327	4.54084	0.000128895	0.00785827	1.11928
Traf6	0.445594	4.28877	1.16404	0.255663	0.574335	-5.66535
Prr5l	0.287023	2.70406	0.67636	0.505173	0.756436	-6.10129
Commd9	0.231695	4.19687	0.800158	0.431341	0.713698	-6.0112
Ldlrad3	0.0389604	6.7672	0.158959	0.875009	0.948572	-6.31705
Trim44	0.0900403	5.28958	0.418912	0.678945	0.856435	-6.24161
Cd44	0.537167	8.17008	3.31426	0.00286569	0.0530691	-1.78612
Pdhx	0.277494	4.34328	0.724048	0.475922	0.738044	-6.0683
Apip	0.259013	5.56634	1.35026	0.189325	0.513125	-5.44412
Cat	-0.314254	5.51609	-1.74453	0.093652	0.376508	-4.88623
Abtb2	0.438788	3.89476	1.12763	0.270442	0.589985	-5.70521
Nat10	0.220007	3.98766	0.541764	0.592894	0.809737	-6.18268
Caprin1	0.129767	7.63451	0.879722	0.387592	0.682595	-5.94576
Lmo2	0.484181	7.55205	2.7661	0.0106462	0.117388	-2.98917
4931422A03Rik	-0.0837871	2.05458	-0.212506	0.833478	0.930284	-6.30703
Fbxo3	0.162011	5.54654	0.370318	0.714341	0.873117	-6.26083
Cd59a	0.585198	1.86471	2.31845	0.0291112	0.21075	-3.88812
Hipk3	0.429311	4.98831	1.09247	0.285294	0.60304	-5.74262
Cstf3	0.128572	6.5831	0.644543	0.525237	0.768073	-6.1221
Tcp11l1	1.16011	4.67945	2.8552	0.00864635	0.104839	-2.80029
Depdc7	0.3695	3.14065	0.920053	0.366552	0.666972	-5.91037
Qser1	0.0931285	4.87035	0.351437	0.728277	0.880777	-6.26766
Prrg4	1.36633	2.04679	4.54372	0.000127946	0.00784448	1.12626
Eif3m	-0.159126	7.90184	-1.29578	0.207176	0.530377	-5.51179
Them7	0.266282	1.97546	0.839535	0.409319	0.700731	-5.97955
Rcn1	-0.244355	2.83015	-0.669615	0.50939	0.758665	-6.10578
Elp4	0.35541	5.35856	1.43954	0.162703	0.482744	-5.32808
Immp1l	0.334316	5.56709	1.86883	0.0736973	0.33788	-4.68731
Dnajc24	0.752341	4.79616	2.02335	0.0541223	0.292704	-4.42608
Arl14ep	0.402453	4.09503	1.09387	0.284694	0.602476	-5.74115
Mettl15	1.1591	3.87386	2.90744	0.00764534	0.0980721	-2.68821
Kif18a	0.732797	5.00932	1.69321	0.103146	0.391377	-4.96528
Lin7c	0.41976	4.6358	1.16168	0.256605	0.575654	-5.66797
Ccdc34	-0.0135923	5.71376	-0.0602903	0.952416	0.979493	-6.32795
Lpcat4	0.769966	3.58052	2.00865	0.0557636	0.294825	-4.45157
Nop10	0.0346844	8.25425	0.205372	0.838985	0.932306	-6.30853
Slc12a6	0.559358	7.03714	2.58062	0.0162892	0.151891	-3.37242
Emc4	0.430042	5.19359	1.06491	0.297342	0.611849	-5.7712
Katnbl1	-0.0377262	5.2904	-0.203267	0.840612	0.93323	-6.30896
Emc7	-0.0530289	6.52226	-0.319102	0.752365	0.892508	-6.27854
Aven	0.283549	4.81643	0.726523	0.474431	0.737809	-6.06653
Fmn1	1.67799	3.97345	4.31295	0.000231125	0.0113492	0.568822
Arhgap11a	0.145767	6.00247	0.720457	0.478089	0.739485	-6.07086
Aqr	0.283801	5.73731	1.58267	0.126373	0.431665	-5.12923
Zfp770	0.518819	2.6576	1.47144	0.153954	0.47034	-5.28512
Dph6	0.350987	4.56922	0.955294	0.348798	0.655021	-5.87824
BC052040	0.509832	4.76375	1.14715	0.262442	0.580783	-5.68398
Spred1	0.00710259	5.05327	0.0159652	0.987392	0.994982	-6.32965
Fam98b	-0.0424823	5.71152	-0.192617	0.848853	0.937236	-6.31109
Rasgrp1	-0.474976	2.81158	-1.10284	0.280855	0.599025	-5.7317
Gm13986	0.641519	2.81724	1.37741	0.180889	0.501782	-5.40949
Thbs1	-0.0226673	3.21236	-0.0476361	0.962394	0.983975	-6.32864
Eif2ak4	0.790146	4.664	2.1632	0.0405332	0.252844	-4.1772
Srp14	0.160629	7.77265	1.4546	0.158524	0.477189	-5.3079
Bmf	1.30648	2.72456	3.46326	0.00198359	0.0423739	-1.44488
Bub1b	0.00613599	6.3529	0.0310283	0.975499	0.989809	-6.3293
Plcb2	1.03445	4.9065	2.73931	0.0113285	0.121557	-3.0454
Inafm2	0.673865	2.93883	2.17204	0.0397876	0.250305	-4.1611
Knstrn	-0.106036	6.3458	-0.759613	0.454763	0.728533	-6.0423
Ivd	0.256823	5.17529	1.07547	0.292683	0.609186	-5.76032
Bahd1	0.53506	2.59451	1.44152	0.162149	0.482094	-5.32544
Ccdc32	0.290847	4.88825	0.65974	0.5156	0.761368	-6.11228
Rpusd2	0.375993	1.8616	1.38673	0.178064	0.4988	-5.39748
Knl1	0.175584	7.36402	0.702594	0.488958	0.745457	-6.08341
Rad51	-0.0709066	5.4772	-0.298345	0.767966	0.900174	-6.28498
Rmdn3	-0.265968	4.39969	-0.9801	0.336655	0.647764	-5.85495
Dnajc17	-0.338869	4.29975	-1.34414	0.191268	0.515717	-5.45184
Zfyve19	0.106484	4.19269	0.289859	0.774373	0.903033	-6.28749
Spint1	-0.258203	2.9384	-0.54739	0.589083	0.80849	-6.17963
Vps18	0.910839	3.80125	2.29384	0.0307001	0.216195	-3.9348
Ino80	-0.136125	6.31906	-0.975915	0.338683	0.649113	-5.85892
Chp1	-0.119868	5.47633	-0.466938	0.644686	0.839067	-6.22033
Oip5os1	0.224293	6.42476	1.43626	0.163627	0.483649	-5.33246
Oip5	-0.0258286	3.43829	-0.0697232	0.944982	0.976835	-6.32733
Nusap1	-0.0198839	7.22548	-0.0995931	0.921481	0.967952	-6.32478
Ndufaf1	0.172663	3.54067	0.530524	0.600544	0.813546	-6.18868
Rtf1	-0.0298168	6.39347	-0.216352	0.830512	0.928432	-6.3062
Rpap1	0.659785	3.45679	1.7842	0.086833	0.364672	-4.82387
Mga	0.304529	5.47693	1.75968	0.0909948	0.372211	-4.86253
Mapkbp1	0.465459	2.54357	1.51574	0.142434	0.452891	-5.22415
Jmjd7	0.169907	2.38418	0.477741	0.637086	0.834983	-6.21524
Ehd4	-0.169451	7.09567	-1.42763	0.166072	0.486165	-5.34393
Vps39	0.205787	3.83193	0.612395	0.545941	0.781517	-6.14214
Tmem87a	0.0941994	5.71581	0.617593	0.542565	0.779311	-6.13897
Ganc	0.264608	4.68415	1.02642	0.314762	0.627441	-5.81
Zfp106	0.232306	7.13531	2.03856	0.0524695	0.287866	-4.39956
Snap23	0.790233	5.55305	1.81858	0.0812712	0.3525	-4.76896
Lrrc57	-0.0596282	3.62868	-0.180363	0.858357	0.941183	-6.31339
Haus2	0.0393563	4.24455	0.109566	0.91365	0.963921	-6.32373
Stard9	-0.245162	4.79992	-0.69515	0.493529	0.748719	-6.08855
Cdan1	-0.372488	3.64363	-1.01126	0.321815	0.633821	-5.82492
Ttbk2	0.57551	1.98669	2.00982	0.0556306	0.294728	-4.44954
Ubr1	0.616695	5.34149	1.48417	0.150569	0.465913	-5.26775
Tmem62	1.18878	2.59333	4.01358	0.000496369	0.0177775	-0.150052
Ccndbp1	0.186869	5.42927	0.963731	0.344635	0.652474	-5.87038
Epb42	0.464221	2.51023	1.29596	0.207115	0.530346	-5.51157
Lcmt2	-0.133531	3.10882	-0.367757	0.716225	0.873992	-6.26177
Adal	0.494528	3.02587	1.2038	0.240214	0.562319	-5.62053
Zscan29	0.236356	3.90202	0.847144	0.405147	0.698326	-5.97326
Tubgcp4	0.00239314	5.34536	0.012444	0.990173	0.995862	-6.3297
Trp53bp1	0.563574	3.05103	1.16803	0.254081	0.573532	-5.66091
Ppip5k1	0.29855	3.22384	0.747741	0.461762	0.73264	-6.05111
Catsper2	0.489767	2.04454	1.64468	0.112859	0.408385	-5.03834
Pdia3	0.0390756	9.67349	0.419372	0.678613	0.856415	-6.24142
Serf2	-0.0904673	10.2219	-0.682416	0.501404	0.754729	-6.09722
Hypk	0.105967	5.31209	0.560856	0.58001	0.803007	-6.1722
Mfap1b	-0.0227263	4.42838	-0.0722945	0.942957	0.975683	-6.32715
Mfap1a	0.624688	4.53465	1.56797	0.129766	0.43715	-5.15036
Wdr76	0.0619662	6.20781	0.306716	0.761662	0.897608	-6.28243
Ctdspl2	-0.204712	6.34545	-1.79773	0.0846057	0.360083	-4.80235
Eif3j1	-0.283895	6.14017	-1.19167	0.244853	0.566227	-5.63435
Spg11	0.641988	4.50975	1.63161	0.115602	0.413758	-5.05773
B2m	0.194631	10.3514	1.50866	0.144225	0.455805	-5.23398
Sord	1.0837	4.85346	4.45871	0.000159103	0.00894606	0.920714
Slc28a2	1.61175	3.65927	3.58519	0.00146398	0.0344622	-1.16217
Gatm	1.07104	6.09256	4.16303	0.000339104	0.0140354	0.208004
AA467197	1.25566	3.12603	2.58476	0.0161373	0.151228	-3.36403
Bloc1s6	0.0101271	5.06237	0.0522932	0.958721	0.982811	-6.3284
Sqor	0.407468	5.06068	0.9831	0.335206	0.646432	-5.8521
Slc24a5	0.323235	2.05992	0.899567	0.377143	0.67666	-5.92853
Myef2	-0.334448	5.34848	-1.5228	0.140663	0.451404	-5.21428
Dut	0.0061183	8.73667	0.0338961	0.973236	0.988539	-6.3292
Cep152	0.525609	4.87094	1.37181	0.182605	0.50359	-5.41669
Shc4	0.631296	2.43183	1.97868	0.0592456	0.305142	-4.50313
Eid1	0.303699	6.81263	2.23319	0.0349582	0.232455	-4.04847
Secisbp2l	-0.203986	5.7814	-0.82365	0.418117	0.707288	-5.99249
Cops2	-0.00703776	6.07413	-0.0447417	0.964677	0.984917	-6.32877
Galk2	-0.0404042	5.70956	-0.23347	0.817344	0.921348	-6.30232
Dtwd1	0.11601	3.43488	0.2481	0.806133	0.916605	-6.29878
Atp8b4	0.797493	8.79742	4.19148	0.000315334	0.0135794	0.276368
Hdc	2.15874	3.92589	4.13056	0.000368406	0.0147461	0.130066
Gabpb1	0.498581	5.01699	1.30412	0.20436	0.528029	-5.50159
Gm27003	0.0249759	2.42399	0.0707221	0.944195	0.976686	-6.32726
Usp8	-0.0736803	6.50812	-0.483514	0.633042	0.8328	-6.21247
Usp50	0.462802	3.69401	1.0544	0.302029	0.615746	-5.78192
Trpm7	0.0480626	6.66571	0.2472	0.806822	0.916947	-6.299
Sppl2a	0.270551	7.22657	2.02853	0.0535548	0.291171	-4.41707
Ap4e1	0.315999	3.95214	0.681192	0.502164	0.754729	-6.09805
Blvra	-0.0269797	6.11498	-0.157334	0.876276	0.948786	-6.3173
Ncaph	-0.0378023	5.52312	-0.226351	0.822814	0.92383	-6.30397
Itpripl1	0.189646	4.56189	0.797964	0.432589	0.714377	-6.01293
1810024B03Rik	0.464286	2.50281	1.34225	0.191871	0.51616	-5.45422
Snrnp200	-0.0938829	5.75639	-0.647753	0.523193	0.766117	-6.12005
Ciao1	0.231962	4.3046	0.633529	0.532282	0.772856	-6.12908
Tmem127	-0.114887	4.90974	-0.543898	0.591447	0.809344	-6.18153
Stard7	0.426228	5.13392	1.06785	0.296039	0.611187	-5.76818
Dusp2	0.427588	3.28485	0.93435	0.359278	0.663188	-5.89747
Fahd2a	0.13	3.14615	0.32089	0.751026	0.891699	-6.27797
Kcnip3	1.09865	3.13374	2.9512	0.0068926	0.093265	-2.5936
Mrps5	-0.263412	5.94184	-1.18215	0.248539	0.569744	-5.6451
Mtln	0.0861762	5.03179	0.38717	0.701987	0.866564	-6.25443
Bub1	-0.149507	6.30483	-0.695139	0.493535	0.748719	-6.08856
Bcl2l11	0.492799	4.3228	1.31872	0.199507	0.523338	-5.48359
Morrbid	0.0260249	7.66889	0.122231	0.903717	0.959919	-6.32225
Anapc1	0.463534	5.69942	1.04364	0.30688	0.620266	-5.7928
Tmem87b	0.113114	4.59024	0.475861	0.638406	0.835289	-6.21613
Zc3h8	0.533045	3.15715	1.48072	0.151478	0.4674	-5.27246
Gm10762	0.127611	3.3095	0.37977	0.707401	0.868997	-6.25727
Zc3h6	0.864243	2.95366	2.07261	0.0489312	0.277231	-4.33971
Ttl	-0.0188832	2.18873	-0.0484899	0.961721	0.983704	-6.3286
Polr1b	0.373774	3.1813	0.902723	0.375498	0.675006	-5.92576
Chchd5	-0.099431	4.16028	-0.364193	0.718851	0.87494	-6.26308
Slc20a1	0.138679	4.29413	0.349502	0.729711	0.881445	-6.26834
Ckap2l	0.238114	6.19118	1.26928	0.216315	0.54007	-5.54384
Gm14023	-0.00714725	2.28589	-0.0193236	0.98474	0.993899	-6.32959
Il1b	0.700138	4.21582	1.33559	0.19401	0.518187	-5.46258
Sirpa	-0.0172762	7.35391	-0.0965421	0.923879	0.968962	-6.32508
Stk35	-0.182066	3.79158	-0.530434	0.600606	0.813546	-6.18873
Snrpb	-0.210924	8.55712	-2.09574	0.0466514	0.271305	-4.29868
Nop56	0.0795693	6.80879	0.378239	0.708523	0.869883	-6.25785
Idh3b	0.116627	6.13531	0.655846	0.51806	0.76251	-6.11482
Pced1a	0.557722	2.65243	1.47412	0.153235	0.469355	-5.28147
Vps16	0.62201	4.17338	1.77717	0.088009	0.367619	-4.835
Ptpra	0.140271	7.12551	0.927455	0.362774	0.664926	-5.90371
Mrps26	-0.267762	6.33652	-1.76731	0.0896828	0.371034	-4.85055
Ubox5	0.174163	2.59941	0.420861	0.67754	0.855636	-6.24079
Fastkd5	-0.391389	2.36071	-1.06453	0.297509	0.611935	-5.77159
Ddrgk1	-0.213192	5.58841	-1.08065	0.290417	0.607552	-5.75496
Itpa	0.0930436	5.84634	0.464046	0.646728	0.840606	-6.22168
4930402H24Rik	0.191419	5.00356	0.808716	0.426494	0.711237	-6.00445
A730017L22Rik	0.101933	1.99229	0.35638	0.724619	0.879102	-6.2659
Atrn	0.703119	6.59055	4.24998	0.000271532	0.0123261	0.417109
1700037H04Rik	-0.000638824	4.42536	-0.00219115	0.99827	0.999118	-6.32978
Cenpb	0.246159	5.10812	0.595535	0.55697	0.788962	-6.15226
Cdc25b	-0.0246717	4.18899	-0.0605479	0.952212	0.979428	-6.32793
Ap5s1	0.0946631	2.88772	0.261078	0.796223	0.912325	-6.29546
Mavs	-0.37274	3.71288	-1.25904	0.219927	0.544275	-5.55606
Pank2	0.154937	5.93137	0.943969	0.354439	0.659529	-5.88868
Rnf24	0.362511	4.66355	1.28108	0.212209	0.535757	-5.52964
Smox	0.649788	4.2121	1.63604	0.114667	0.412177	-5.05117
Prnp	0.896084	1.97685	3.41315	0.00224584	0.0462463	-1.5602
Rassf2	0.355685	5.20879	1.67853	0.106006	0.395641	-4.98755
Slc23a2	0.323939	4.36431	0.84213	0.407894	0.699674	-5.97741
Tmem230	0.349128	4.29513	1.31978	0.199158	0.523054	-5.48228
Pcna	-0.0579691	8.02163	-0.472106	0.641046	0.836459	-6.21791
AV099323	0.238315	2.01961	0.703695	0.488284	0.745058	-6.08264
Cds2	-0.0347944	4.46286	-0.152936	0.879706	0.949786	-6.31799
Gpcpd1	0.480866	6.10704	2.3656	0.0262751	0.200237	-3.79781
Shld1	0.700282	3.73639	1.63087	0.115758	0.414044	-5.05882
Trmt6	-0.152801	5.40411	-0.706385	0.486639	0.743951	-6.08077
Mcm8	0.271007	3.55998	0.788202	0.438169	0.717064	-6.02053
Crls1	0.209552	4.30989	0.540799	0.593549	0.809738	-6.1832
Tmx4	0.815059	6.30153	4.42726	0.00017246	0.0094047	0.844717
Plcb1	0.0841372	8.4593	0.373178	0.712238	0.87247	-6.25976
Plcb4	0.809032	3.89432	1.86452	0.0743221	0.33886	-4.69438
Mkks	-0.0793412	2.36844	-0.185194	0.854608	0.93958	-6.3125
Slx4ip	0.222768	5.65286	1.363	0.185328	0.507361	-5.42794
Tasp1	0.366044	3.8496	0.844519	0.406584	0.699242	-5.97544
Esf1	0.0143121	5.63322	0.0604852	0.952262	0.979428	-6.32794
Ndufaf5	0.284575	3.67667	0.734963	0.469367	0.735959	-6.06045
Macrod2	0.231431	3.55811	0.588973	0.561293	0.791064	-6.15612
Kif16b	0.506868	4.72254	1.27365	0.214786	0.53877	-5.53859
Snrpb2	0.0193291	7.07494	0.109267	0.913885	0.963921	-6.32376
Dstn	0.717241	8.12985	4.07996	0.000419162	0.0160167	0.008746
Rrbp1	-0.144483	8.34379	-1.24709	0.224201	0.54798	-5.57022
Snx5	-0.00982799	7.22167	-0.0575007	0.954615	0.980688	-6.32811
Mgme1	0.358865	4.00934	0.945824	0.353511	0.659342	-5.88698
Kat14	0.304529	4.29461	0.867564	0.394085	0.688499	-5.95614
Polr3f	-0.170138	4.11792	-0.466485	0.645006	0.839181	-6.22055
Rbbp9	1.27477	2.48097	4.05959	0.000441492	0.0163518	-0.0400184
Sec23b	0.087956	5.48977	0.510557	0.61425	0.822511	-6.19905
Smim26	0.453408	4.23483	1.19577	0.243279	0.565323	-5.62969
Dtd1	1.1758	5.16307	2.66084	0.013571	0.135485	-3.2084
Rin2	-0.222534	5.45963	-0.956853	0.348026	0.65492	-5.87679
Naa20	-0.0967857	5.92233	-0.494222	0.625569	0.828654	-6.20724
Crnkl1	-0.130435	5.8142	-0.693826	0.494344	0.749458	-6.08946
Ralgapa2	0.119811	6.10067	0.560998	0.579915	0.803007	-6.17212
Kiz	0.827464	3.93419	1.98073	0.0590014	0.304317	-4.49962
Xrn2	-0.0859526	7.89233	-0.855314	0.400698	0.693852	-5.96646
Thbd	1.32966	2.994	3.52863	0.00168597	0.0378803	-1.29367
Cd93	1.24617	5.71628	2.9269	0.00730142	0.0953556	-2.64622
Nxt1	0.231166	6.32953	1.47955	0.151789	0.46773	-5.27406
Gzf1	-0.198802	4.5495	-0.794951	0.434307	0.715515	-6.01528
Cst3	0.144001	10.2487	1.13425	0.267711	0.586208	-5.69805
Zfp120	0.733839	4.83814	1.87028	0.0734878	0.337475	-4.68492
3300002I08Rik	-0.176669	3.39829	-0.488748	0.629384	0.830536	-6.20992
Gm10130	0.712773	2.36023	2.09554	0.0466707	0.271305	-4.29903
Zfp442	0.403884	1.98523	1.3556	0.187641	0.510784	-5.43735
Cst7	1.38696	5.40364	5.08151	3.22866e-05	0.00330542	2.42629
Apmap	0.299459	4.45979	0.817577	0.421511	0.709184	-5.99738
Acss1	0.37362	3.35298	1.05708	0.300829	0.615033	-5.7792
Entpd6	-0.0174828	3.24903	-0.0498255	0.960667	0.983566	-6.32853
Pygb	0.446273	4.26478	1.69635	0.102543	0.39065	-4.96051
Abhd12	0.0264589	5.71604	0.155953	0.877353	0.948997	-6.31752
Gins1	-0.110432	5.55609	-0.376421	0.709857	0.87068	-6.25854
Ninl	0.0158666	2.12625	0.0483646	0.961819	0.983704	-6.3286
Nanp	0.306091	4.46824	0.776515	0.444907	0.72149	-6.02952
Nsfl1c	0.459269	5.8903	0.992542	0.330674	0.642061	-5.84306
Fkbp1a	-0.122933	7.53098	-0.834398	0.412151	0.701963	-5.98376
Psmf1	0.697781	4.62055	1.70255	0.10136	0.388427	-4.95104
Fam110a	-0.137805	4.52112	-0.654946	0.518629	0.762769	-6.1154
Slc52a3	1.76535	3.03526	4.80341	6.5755e-05	0.00495118	1.75454
Csnk2a1	0.128061	6.94485	0.748098	0.461551	0.73264	-6.05085
Tbc1d20	0.217939	4.77122	0.533571	0.598466	0.812777	-6.18707
Rbck1	-0.42795	5.52866	-2.11793	0.0445528	0.264925	-4.259
Gm14164	0.482774	2.33668	1.34225	0.191872	0.51616	-5.45422
Zcchc3	0.913828	3.07102	2.28223	0.0314765	0.219817	-3.9567
Rem1	1.214	2.99572	2.80294	0.00977154	0.11245	-2.91145
H13	0.296437	7.71173	2.43973	0.0223253	0.182573	-3.65361
Id1	0.325961	6.49588	1.84258	0.077574	0.346576	-4.73017
Cox4i2	1.27576	2.82491	3.0281	0.00573791	0.083581	-2.4258
Bcl2l1	1.13492	3.40462	2.88704	0.00802226	0.100995	-2.73208
Tpx2	0.0118912	7.57182	0.0699767	0.944783	0.976827	-6.32731
Ttll9	1.47244	1.98099	5.70475	6.6566e-06	0.00138918	3.91671
Pdrg1	-0.0287565	5.21969	-0.150976	0.881236	0.949989	-6.31829
Ccm2l	2.48022	2.81247	7.8817	3.65236e-08	9.90884e-05	8.77743
Hck	0.0627641	6.98788	0.338874	0.737603	0.885548	-6.27201
Tm9sf4	0.0691691	5.93491	0.422081	0.676662	0.855046	-6.24028
Plagl2	0.208951	5.48804	1.37949	0.180256	0.501445	-5.40682
Pofut1	0.191879	4.34498	0.527904	0.602334	0.815011	-6.19007
Kif3b	0.206922	4.91757	0.893919	0.380098	0.67803	-5.93347
2500004C02Rik	0.268551	2.09948	0.861828	0.397173	0.690724	-5.96099
Asxl1	-0.0221683	6.34431	-0.166937	0.868796	0.946508	-6.31574
Nol4l	0.545715	2.48702	1.60693	0.120934	0.423758	-5.094
Commd7	0.234069	6.54958	1.14779	0.262185	0.580779	-5.68328
Dnmt3b	0.374504	2.87285	1.02484	0.315491	0.628319	-5.81156
Mapre1	-0.0810749	7.24975	-0.698007	0.491771	0.747729	-6.08658
Cdk5rap1	0.491629	3.17312	1.26655	0.217275	0.540672	-5.54711
Cbfa2t2	0.0829134	4.49047	0.216132	0.830682	0.928474	-6.30625
E2f1	-0.0222807	5.2874	-0.120721	0.904901	0.960356	-6.32243
Pxmp4	1.0752	4.27878	2.92212	0.00738446	0.0963174	-2.65654
Zfp341	-0.30584	2.76196	-0.71646	0.480509	0.740462	-6.07369
Chmp4b	-0.128884	7.81575	-1.19827	0.242322	0.564649	-5.62685
Raly	-0.0378974	7.29604	-0.150933	0.881269	0.949989	-6.3183
a	0.938489	3.16873	2.29541	0.0305964	0.215745	-3.93183
Eif2s2	-0.0301626	7.78604	-0.196673	0.845713	0.935814	-6.31029
Ahcy	0.255898	3.5072	0.622922	0.539115	0.777248	-6.13569
Itch	0.282049	7.02365	1.81718	0.0814916	0.353033	-4.77121
Dynlrb1	0.0917372	7.61505	0.873784	0.390754	0.685162	-5.95085
Map1lc3a	-0.564475	3.59691	-1.91102	0.067818	0.324069	-4.61747
Pigu	-0.0138094	5.01806	-0.0610479	0.951818	0.97925	-6.3279
Ncoa6	-0.0612144	5.78105	-0.344842	0.733168	0.882664	-6.26996
Acss2	0.78393	3.03271	2.01184	0.0554033	0.294728	-4.44605
Gss	-0.48827	3.56112	-1.22001	0.234122	0.557466	-5.60188
Trpc4ap	0.45152	5.959	0.972418	0.340384	0.650211	-5.86222
Edem2	0.264117	6.26638	1.32668	0.196898	0.521556	-5.4737
BC029722	-0.383879	3.52266	-0.931456	0.360743	0.663873	-5.90009
Eif6	0.284965	6.45959	0.553871	0.584707	0.805745	-6.17607
Uqcc1	0.367552	4.98847	0.923448	0.364816	0.665711	-5.90732
Cep250	-0.133146	5.55475	-0.792916	0.435469	0.716104	-6.01687
Ergic3	0.567997	5.50831	1.32476	0.197524	0.521798	-5.47609
Cpne1	-0.00606139	5.89468	-0.0392554	0.969006	0.987091	-6.329
Nfs1	0.417123	4.52731	1.07614	0.292392	0.609186	-5.75964
Romo1	-0.0395559	7.12363	-0.184963	0.854787	0.93958	-6.31254
Rbm39	0.0197828	8.62989	0.177065	0.860919	0.942045	-6.31398
Phf20	0.0783728	5.66378	0.39401	0.696996	0.86362	-6.25175
Scand1	0.137619	7.73463	1.21367	0.23649	0.558708	-5.6092
Cnbd2	0.931928	3.61426	2.11135	0.0451664	0.267255	-4.2708
2900097C17Rik	-0.03178	5.54403	-0.156731	0.876747	0.948884	-6.3174
Aar2	0.156835	3.47157	0.459911	0.649652	0.842998	-6.22359
Dlgap4	-0.184396	4.3151	-0.838975	0.409628	0.700772	-5.98001
5430405H02Rik	0.349014	3.41456	0.874807	0.390208	0.685052	-5.94997
Rab5if	-0.148603	8.23531	-1.1291	0.269835	0.589303	-5.70362
Ndrg3	0.102146	3.90542	0.272118	0.787821	0.909417	-6.2925
Dsn1	0.524127	4.19772	1.53902	0.136668	0.446237	-5.19151
Soga1	-0.790832	2.36758	-2.11183	0.0451215	0.267135	-4.26994
Samhd1	0.19838	8.31293	1.07211	0.294161	0.610482	-5.7638
Rbl1	0.124427	6.39924	0.641802	0.526986	0.769904	-6.12385
Rpn2	-0.0795205	7.03778	-0.545877	0.590107	0.809009	-6.18045
Manbal	0.163987	4.7941	0.393928	0.697056	0.86362	-6.25178
Blcap	-0.355774	2.93337	-1.10429	0.280239	0.598534	-5.73017
Ctnnbl1	0.428782	5.27251	1.04627	0.305691	0.619373	-5.79015
Tti1	0.554232	3.61911	1.44749	0.160486	0.479647	-5.31745
Rprd1b	-0.25611	6.07013	-1.43545	0.163854	0.483806	-5.33354
Tgm2	-0.436544	2.27999	-1.19979	0.24174	0.564285	-5.62511
Lbp	0.830993	5.6509	3.07827	0.00508707	0.0774654	-2.31534
Snhg17	0.228498	2.72306	0.723483	0.476262	0.738044	-6.0687
Ralgapb	0.521256	5.10062	1.2828	0.211615	0.53535	-5.52756
Actr5	0.409696	3.93038	1.15161	0.260641	0.579724	-5.67909
Fam83d	0.24642	3.61167	0.712562	0.482875	0.741208	-6.07644
Dhx35	0.579314	3.52379	1.444	0.161456	0.480955	-5.32212
Mafb	-0.478283	3.3956	-0.810305	0.425598	0.71072	-6.00318
Top1	0.0280902	7.61615	0.186167	0.853853	0.939355	-6.31232
Zhx3	0.436807	3.02619	1.23656	0.228022	0.552335	-5.58261
Chd6	0.50455	5.13618	1.22621	0.231822	0.554848	-5.59469
Srsf6	0.025822	7.06604	0.148043	0.883525	0.950547	-6.31873
Ift52	0.0259	5.11891	0.110766	0.912708	0.963681	-6.3236
Mybl2	-0.151955	4.62007	-0.355967	0.724924	0.879276	-6.26605
Oser1	-0.440046	6.05966	-3.2934	0.00301621	0.0547962	-1.83349
2900093K20Rik	-0.139402	3.13879	-0.386823	0.70224	0.866582	-6.25456
Fitm2	0.247357	2.18184	0.806886	0.427527	0.71202	-6.0059
Ttpal	-0.0826718	3.69306	-0.225088	0.823785	0.924376	-6.30426
Serinc3	-0.241033	8.12628	-2.55344	0.0173201	0.15755	-3.42737
Pkig	-0.285458	6.93769	-2.31066	0.0296052	0.212621	-3.90291
Ada	0.46412	3.08342	1.19246	0.244548	0.566019	-5.63345
Ywhab	0.022562	8.23567	0.227073	0.822259	0.923626	-6.30381
Pabpc1l	1.01602	2.46943	2.45313	0.0216728	0.179994	-3.62727
Tomm34	-0.266583	5.80209	-1.88586	0.0712733	0.331814	-4.65926
Stk4	-0.149191	7.46386	-1.26498	0.217826	0.541605	-5.54898
Slpi	0.884143	8.67502	3.5259	0.00169749	0.0379817	-1.30001
Sys1	0.064442	6.56916	0.479225	0.636045	0.834526	-6.21453
Dbndd2	0.110066	2.11957	0.313697	0.756417	0.894187	-6.28026
Pigt	0.150917	5.4541	0.731974	0.471157	0.737276	-6.06261
Dnttip1	-0.34237	5.35615	-1.73698	0.0949995	0.379159	-4.89797
Gm11457	0.226244	1.9658	0.731422	0.471487	0.737366	-6.06301
Ube2c	-0.0938708	8.43848	-0.563007	0.578567	0.802327	-6.171
Snx21	-0.334575	2.25973	-0.904446	0.374603	0.674272	-5.92424
Acot8	0.35716	4.61955	0.947382	0.352732	0.658915	-5.88555
Zswim3	0.984515	2.66203	2.94123	0.0070575	0.0944057	-2.6152
Zswim1	0.732224	2.31769	1.88531	0.0713496	0.331837	-4.66016
Neurl2	0.191105	2.51782	0.541999	0.592735	0.809737	-6.18255
Ctsa	-0.0495193	6.64132	-0.289463	0.774672	0.903033	-6.2876
Pcif1	-0.210767	5.82976	-1.35205	0.188758	0.51229	-5.44184
Zfp335	-0.185528	3.42609	-0.469	0.643233	0.83808	-6.21937
Zfp335os	0.305946	2.71425	0.928875	0.362052	0.664916	-5.90243
Mmp9	0.539942	3.02464	1.34973	0.189493	0.513324	-5.44479
Ncoa5	-0.0040236	4.42966	-0.0159906	0.987372	0.994982	-6.32965
Cd40	-0.0836894	2.32133	-0.203668	0.840302	0.932981	-6.30888
Slc35c2	0.29755	5.16634	0.716165	0.480688	0.740462	-6.0739
Elmo2	0.132814	5.19035	0.303482	0.764095	0.898662	-6.28343
Trp53rka	-0.233706	3.44091	-0.717559	0.479843	0.740462	-6.07292
Zmynd8	0.183504	6.72854	1.29977	0.205826	0.52942	-5.50692
Ncoa3	-0.146214	6.48503	-1.06504	0.297282	0.611849	-5.77106
Sulf2	0.260608	4.2478	0.439737	0.663998	0.84983	-6.23266
5031425F14Rik	0.496725	2.13247	1.43565	0.163799	0.483806	-5.33327
Prex1	-0.0801041	6.73601	-0.582686	0.565451	0.793933	-6.15978
Trp53rkb	0.288811	2.68296	0.74277	0.464712	0.734353	-6.05476
Arfgef2	0.489368	4.17464	1.27972	0.212677	0.53594	-5.53128
Cse1l	-0.117069	5.82423	-0.543868	0.591468	0.809344	-6.18154
Stau1	0.124548	5.54525	0.736535	0.468428	0.735868	-6.0593
Ddx27	-0.024225	5.8856	-0.135236	0.893534	0.954957	-6.32056
Znfx1	0.150182	5.41642	0.716065	0.480749	0.740462	-6.07397
Zfas1	-0.0366274	5.95723	-0.198554	0.844256	0.934885	-6.30992
B4galt5	-0.311084	5.88914	-1.87415	0.0729323	0.33622	-4.67857
Slc9a8	0.18592	4.55514	0.497408	0.623354	0.827607	-6.20566
Spata2	0.023228	3.35176	0.0696241	0.94506	0.976835	-6.32734
Rnf114	0.678043	4.762	1.82532	0.0802184	0.351339	-4.75811
Ube2v1	-0.0748053	6.14569	-0.454566	0.653439	0.844836	-6.22603
Tmem189	-0.0067676	5.33393	-0.0345125	0.972749	0.988365	-6.32918
Cebpb	-0.354475	8.76131	-3.01567	0.00591104	0.084738	-2.45304
A530013C23Rik	-0.185912	2.16564	-0.636412	0.530433	0.771257	-6.12726
Ptpn1	-0.247224	8.11379	-1.26359	0.218315	0.541923	-5.55064
Adnp	0.111509	6.5035	0.813185	0.423976	0.710031	-6.00089
Dpm1	-0.252278	7.02193	-2.1051	0.0457557	0.269416	-4.28197
Mocs3	0.281115	2.93762	0.69822	0.491641	0.747658	-6.08644
Nfatc2	1.10404	3.92226	2.76774	0.0106058	0.117388	-2.98573
Zfp64	0.590907	4.05951	1.38762	0.177795	0.498562	-5.39633
Zfp217	0.720975	5.72944	1.60459	0.12145	0.424376	-5.09742
Pfdn4	0.350308	5.85333	2.0143	0.0551274	0.294344	-4.44179
Fam210b	0.241606	3.95263	0.701585	0.489576	0.746074	-6.08411
Aurka	0.149186	6.10214	0.651682	0.520698	0.763752	-6.11752
Cstf1	0.0138066	4.20994	0.0379372	0.970046	0.987402	-6.32905
Cass4	0.578892	2.72297	1.56155	0.131271	0.439869	-5.15953
Rtf2	0.0918563	6.6046	0.761165	0.453852	0.728365	-6.04113
Rae1	0.406388	5.70505	0.880207	0.387334	0.682402	-5.94534
Rbm38	-0.230192	5.78134	-1.31888	0.199453	0.523322	-5.48339
Zbp1	0.80164	5.37963	1.73485	0.0953826	0.379848	-4.90127
Rab22a	-0.133581	5.45282	-0.714405	0.481756	0.740738	-6.07514
Vapb	0.119787	5.80266	0.591119	0.559877	0.790501	-6.15486
Stx16	-0.141205	6.03761	-0.704975	0.487501	0.744338	-6.08175
Npepl1	-0.135955	3.94375	-0.334351	0.740971	0.887352	-6.27354
Gnas	-0.465737	8.30035	-4.26446	0.000261659	0.0121347	0.451977
Gm20721	-0.444458	2.28417	-1.21085	0.237549	0.559559	-5.61244
Nelfcd	0.246319	4.40879	0.591671	0.559513	0.790501	-6.15454
Ctsz	-0.0922851	8.14613	-0.663131	0.513463	0.759821	-6.11006
Atp5e	0.215747	8.46007	1.00289	0.325757	0.636569	-5.83307
Prelid3b	-0.205039	6.1403	-1.16392	0.25571	0.574335	-5.66548
Zfp831	0.757442	2.29206	2.07246	0.0489471	0.277231	-4.33999
Gm14325	0.145123	2.80621	0.400743	0.692097	0.862572	-6.24907
Gm14326	-0.0759111	3.60446	-0.208477	0.836587	0.931827	-6.30788
Zfp971	-0.205883	4.37044	-0.722258	0.477001	0.738644	-6.06958
Zfp931	0.361664	2.15302	1.12917	0.269805	0.589303	-5.70355
Fam217b	0.250788	3.76024	0.965587	0.343724	0.651952	-5.86864
Taf4	0.265052	4.13493	0.679468	0.503236	0.755087	-6.09921
4921531C22Rik	0.52463	2.48894	1.56859	0.12962	0.436981	-5.14947
Lsm14b	0.520032	3.1352	1.23452	0.228767	0.552909	-5.585
Psma7	0.103314	9.56962	0.724002	0.475949	0.738044	-6.06833
Ss18l1	0.503963	2.41578	1.4511	0.159489	0.47832	-5.31261
Mtg2	0.446295	3.56851	1.22381	0.232709	0.555706	-5.59747
Osbpl2	0.996719	4.1729	2.39309	0.0247408	0.193156	-3.74465
Adrm1	0.107661	5.48079	0.238811	0.813246	0.919368	-6.30106
Rps21	-0.191767	10.5495	-0.857745	0.39938	0.69323	-5.96442
Cables2	0.238913	3.94729	0.613845	0.544999	0.781264	-6.14126
Slco4a1	0.11268	2.51109	0.312352	0.757427	0.894893	-6.28068
Mrgbp	0.282213	4.61759	0.721722	0.477325	0.73904	-6.06996
Ogfr	0.0722764	5.36521	0.424799	0.674706	0.854144	-6.23913
Dido1	0.522136	5.64633	1.21285	0.236797	0.55896	-5.61014
Gid8	-0.0589821	6.16627	-0.430728	0.670447	0.853153	-6.23659
Slc17a9	0.686906	3.03456	2.12294	0.0440916	0.263481	-4.25001
Ythdf1	0.0897706	5.48086	0.430433	0.670659	0.853223	-6.23671
Arfgap1	0.445454	4.12925	1.18204	0.248579	0.569744	-5.64522
Ppdpf	-0.16675	5.28494	-0.94361	0.354619	0.65975	-5.88901
Helz2	0.752124	3.17979	1.73116	0.0960512	0.380202	-4.907
Gmeb2	0.182317	4.47163	0.504137	0.618687	0.824766	-6.2023
Rtel1	0.706407	3.11384	1.64962	0.111836	0.406126	-5.03098
Arfrp1	0.0992984	5.1846	0.23525	0.815978	0.920379	-6.30191
Zgpat	0.485087	3.14521	1.34629	0.190583	0.514993	-5.44913
Zbtb46	1.13029	2.09396	4.39219	0.000188674	0.00998776	0.760022
Tpd52l2	0.681119	5.88902	1.51127	0.143562	0.454606	-5.23036
Dnajc5	0.254665	6.29489	1.38481	0.178643	0.499647	-5.39996
Uckl1	-0.105724	4.2896	-0.402762	0.69063	0.862255	-6.24826
Zfp512b	0.11961	2.90009	0.363866	0.719092	0.875022	-6.2632
Prpf6	-0.37918	5.64865	-1.92027	0.0665862	0.321664	-4.60202
Samd10	0.613048	2.69285	1.90283	0.0689267	0.326561	-4.63112
Tcea2	0.807215	1.83855	3.37672	0.0024573	0.0486145	-1.64368
Rgs19	0.10748	6.66074	0.801086	0.430814	0.713644	-6.01047
Pcmtd2	0.373108	3.73353	1.02262	0.316519	0.629385	-5.81375
Polr3k	-0.0754655	5.72246	-0.35553	0.725247	0.879471	-6.26621
Pex2	0.539758	4.68146	1.39523	0.175517	0.496964	-5.38646
Gm8797	0.304119	2.17082	0.881747	0.386517	0.682156	-5.94402
Zc2hc1a	1.38157	3.59592	3.38695	0.00239605	0.0480627	-1.62028
Mrps28	-0.0768263	5.88648	-0.319477	0.752084	0.892272	-6.27842
Tpd52	-0.0466284	8.57818	-0.386717	0.702318	0.866582	-6.2546
Zfp704	-0.404434	4.90331	-1.281	0.212235	0.535757	-5.52973
Pag1	0.37822	6.63906	1.95798	0.0617612	0.310932	-4.53842
Fabp5	0.440627	9.3139	2.56413	0.0169075	0.154966	-3.40579
Impa1	0.0400593	6.26217	0.227982	0.82156	0.923105	-6.3036
Zfand1	0.628801	3.92962	1.59629	0.123296	0.426138	-5.10951
Snx16	0.0536725	2.93171	0.181165	0.857735	0.940871	-6.31324
Lrrcc1	0.781109	5.36893	1.97392	0.0598154	0.306144	-4.51126
E2f5	0.426737	2.43057	1.15456	0.259453	0.578819	-5.67584
Rbis	0.131289	5.86465	0.438323	0.665008	0.850822	-6.23329
Car13	0.903761	2.30736	2.70108	0.0123735	0.127883	-3.12512
Car1	0.480739	5.33742	0.955499	0.348696	0.655021	-5.87805
Car2	0.0606344	7.5512	0.201141	0.842255	0.933908	-6.3094
Gm9733	0.605633	6.23548	1.80597	0.083275	0.356858	-4.7892
Sirpb1a	-0.46395	3.66262	-0.884386	0.38512	0.681225	-5.94174
Sirpb1b	0.560323	4.89707	1.22796	0.231176	0.55483	-5.59265
Sirpb1c	-0.445802	5.09737	-1.28726	0.210081	0.534412	-5.52216
Gm5150	-0.939376	5.02304	-2.8402	0.00895607	0.106804	-2.8323
Ythdf3	0.26445	6.46416	1.31306	0.201379	0.525454	-5.49059
Armc1	-0.352979	5.97349	-2.02214	0.0542553	0.292704	-4.42817
Mtfr1	0.0543639	3.9855	0.163809	0.871231	0.947323	-6.31626
Pde7a	0.0367944	5.14109	0.201275	0.842152	0.933889	-6.30937
Hps3	0.0509323	6.28695	0.210391	0.835109	0.93093	-6.30748
Hltf	0.371582	6.10814	1.89056	0.0706154	0.331023	-4.65147
Gyg	0.213488	6.75652	1.30081	0.205474	0.528994	-5.50564
Cpa3	0.149461	2.15979	0.323696	0.748926	0.891067	-6.27706
Gm43672	0.0276713	2.44842	0.0748356	0.940956	0.975683	-6.32696
Tbl1xr1	-0.139045	7.16043	-0.811069	0.425167	0.71072	-6.00258
Ect2	0.518311	5.73382	1.18161	0.248749	0.569979	-5.64571
Nceh1	0.491496	5.49893	3.34955	0.00262748	0.0501115	-1.70575
Tnfsf10	1.22412	2.32359	3.62686	0.00131899	0.0326842	-1.06492
Fndc3b	0.366537	6.83613	1.77064	0.0891146	0.369676	-4.84531
Pld1	0.875219	5.1912	3.28206	0.00310121	0.0558338	-1.8592
Tnik	0.842752	1.87874	3.61948	0.0013436	0.0329886	-1.08216
Rpl22l1	-0.0230933	8.76823	-0.143176	0.887327	0.952487	-6.31945
Mynn	0.510739	3.64928	1.2412	0.226331	0.550089	-5.57716
Sec62	0.0998259	6.73828	0.616141	0.543507	0.779765	-6.13986
Gpr160	0.32917	6.21896	1.95338	0.0623327	0.311819	-4.54622
Phc3	0.450563	5.06761	1.10562	0.279673	0.598534	-5.72875
Prkci	0.0396091	3.31961	0.113718	0.910392	0.962265	-6.32326
Skil	0.370437	4.22513	0.930858	0.361046	0.664305	-5.90064
Pik3ca	0.14115	5.80865	0.83522	0.411698	0.701813	-5.98308
Zfp639	0.901807	4.47094	2.33261	0.0282313	0.207565	-3.86112
Mfn1	0.0612558	3.94564	0.164951	0.870341	0.947323	-6.31607
Actl6a	-0.437954	6.74843	-3.37069	0.00249411	0.0491218	-1.65747
Mrpl47	0.321385	4.34854	0.804505	0.428875	0.712496	-6.00778
Ndufb5	-0.126687	7.91908	-1.15219	0.260408	0.579594	-5.67845
Ttc14	0.342509	6.07914	1.95592	0.0620165	0.311143	-4.54191
Fxr1	0.0145146	6.94916	0.0633698	0.949988	0.978574	-6.32776
Dnajc19	0.103862	6.86266	0.639978	0.528151	0.770732	-6.12501
Atp11b	0.352114	7.30013	2.77495	0.0104296	0.11655	-2.97055
Dcun1d1	0.244743	6.14972	1.46342	0.156115	0.472867	-5.29598
Gm15952	0.363782	2.20744	1.06573	0.296976	0.611533	-5.77035
Mccc1	0.498338	3.28954	1.58754	0.125264	0.430068	-5.12219
Acad9	-0.609929	4.20547	-2.16311	0.0405409	0.252844	-4.17737
Zfp267	0.290272	2.13999	0.724954	0.475375	0.738044	-6.06765
Anxa5	-0.0682801	7.9028	-0.358763	0.722858	0.877652	-6.26505
Exosc9	0.136756	5.34119	0.622719	0.539246	0.777248	-6.13582
Ccna2	-0.160391	7.147	-1.23111	0.230018	0.553839	-5.58898
4932438A13Rik	0.103526	6.42449	0.599202	0.554562	0.787529	-6.15008
Cetn4	0.335767	2.03831	1.18201	0.248594	0.569744	-5.64526
Bbs12	0.281055	2.24713	0.928146	0.362422	0.664926	-5.90309
Nudt6	0.228326	3.28787	0.679825	0.503014	0.755087	-6.09897
Spata5	0.484296	5.7282	1.07676	0.292118	0.609042	-5.75899
Ankrd50	-0.0885822	2.71174	-0.286333	0.77704	0.90438	-6.28851
Intu	0.278295	1.85108	1.04494	0.306292	0.62001	-5.79149
Hspa4l	0.158051	5.35653	0.748878	0.461089	0.732397	-6.05027
Plk4	-0.174525	6.12591	-1.28029	0.212481	0.53594	-5.5306
Mfsd8	0.64798	3.30084	1.79781	0.0845927	0.360083	-4.80222
Abhd18	0.243207	3.52749	0.762525	0.453055	0.727644	-6.04011
6430590A07Rik	0.643461	2.49546	1.73202	0.0958949	0.379938	-4.90567
Larp1b	0.29436	4.74951	0.747222	0.46207	0.73264	-6.05149
Pgrmc2	0.222493	5.29308	0.533255	0.598681	0.812777	-6.18724
Jade1	0.024367	4.96445	0.115533	0.908968	0.961996	-6.32305
Sclt1	0.257724	5.01629	1.32666	0.196905	0.521556	-5.47373
D3Ertd751e	0.105581	2.94146	0.301367	0.765688	0.899269	-6.28407
Slc7a11	0.585134	3.03586	1.18483	0.247498	0.569022	-5.64209
Noct	0.438217	3.82342	1.17158	0.252678	0.572925	-5.65695
Elf2	0.103831	6.86632	0.62675	0.536643	0.775143	-6.13332
Ndufc1	-0.187461	7.55786	-0.745959	0.462818	0.732885	-6.05242
Naa15	0.112005	6.65205	0.557326	0.582382	0.804018	-6.17416
Rab33b	0.392216	3.75618	1.17004	0.253286	0.573422	-5.65867
Setd7	0.16136	5.31795	0.817725	0.421428	0.709184	-5.99726
Mgst2	1.36936	6.0065	4.91231	4.97549e-05	0.00411224	2.01785
Maml3	-0.0548386	6.84712	-0.319788	0.751851	0.892272	-6.27832
Foxo1	0.964719	3.71993	2.38444	0.0252146	0.195449	-3.76142
Cog6	0.843229	4.03012	2.32684	0.0285866	0.208763	-3.87212
Nhlrc3	0.314408	3.64476	0.841823	0.408062	0.699793	-5.97766
Proser1	0.0177602	4.2563	0.0491201	0.961223	0.983663	-6.32856
Ufm1	-0.190544	5.90447	-1.01435	0.320371	0.632772	-5.8219
Supt20	0.7045	5.71267	1.6353	0.114823	0.412191	-5.05227
Exosc8	-0.209264	7.3478	-1.38197	0.179504	0.500568	-5.40363
Alg5	0.533805	5.21376	1.32564	0.197237	0.521593	-5.475
Rfxap	0.0918615	4.74325	0.327422	0.746141	0.889892	-6.27584
Spg20	0.581424	3.04361	1.7039	0.101104	0.387937	-4.94897
Tm4sf1	1.58249	2.32251	3.39898	0.00232589	0.0471786	-1.59271
Commd2	0.23409	6.23545	1.27325	0.214926	0.538831	-5.53907
Rnf13	0.796407	5.91102	1.77629	0.0881581	0.367817	-4.83639
Tsc22d2	-0.0158058	5.60067	-0.0867216	0.931601	0.972039	-6.32599
Serp1	0.113179	7.72258	0.769247	0.449129	0.725182	-6.03505
Eif2a	0.0389963	6.44253	0.291298	0.773286	0.902705	-6.28707
Selenot	0.0353794	6.44342	0.172651	0.86435	0.943844	-6.31476
Siah2	-0.140811	4.53147	-0.544426	0.59109	0.809344	-6.18124
Med12l	0.239337	2.8722	0.616856	0.543043	0.779311	-6.13942
Gpr171	0.705756	2.55491	1.67747	0.106217	0.396104	-4.98917
P2ry14	1.76674	3.02907	4.38747	0.00019097	0.0100116	0.748626
P2ry13	0.23208	2.36601	0.583954	0.564611	0.793263	-6.15905
P2ry12	-1.14064	3.93476	-3.88956	0.000680152	0.0213942	-0.445552
Mbnl1	-0.0302277	9.31697	-0.250275	0.80447	0.915809	-6.29824
P2ry1	0.402514	3.6171	1.12512	0.271484	0.591109	-5.70792
Rap2b	0.153423	6.07696	0.679914	0.502959	0.755087	-6.09891
Dhx36	0.371009	6.48691	1.72433	0.0972956	0.381921	-4.91756
E130311K13Rik	0.321389	2.35169	0.961544	0.345711	0.652796	-5.87242
Slc33a1	0.0786645	4.48314	0.328544	0.745304	0.889675	-6.27547
Gmps	-0.102187	6.76267	-0.835223	0.411696	0.701813	-5.98308
Vmn2r7	0.586146	1.82651	2.36485	0.0263183	0.200425	-3.79926
Ssr3	0.180146	7.33443	1.64665	0.112451	0.407859	-5.03541
Tiparp	0.000154676	5.6743	0.000797122	0.99937	0.999676	-6.32978
Ccnl1	0.143289	6.99074	0.840603	0.408732	0.700167	-5.97867
Gm37305	0.00139279	2.26567	0.00397942	0.996857	0.998528	-6.32977
Rsrc1	0.288669	6.84864	1.88863	0.0708854	0.331263	-4.65468
Gfm1	0.273423	4.73146	0.638819	0.528892	0.770732	-6.12574
Lxn	0.948728	4.28123	2.18216	0.0389486	0.247318	-4.14259
Mfsd1	-0.158633	6.81397	-1.21612	0.235574	0.558286	-5.60638
Ift80	0.781249	4.13302	2.0556	0.050672	0.282721	-4.36971
Smc4	0.136085	8.33399	0.40864	0.686368	0.860071	-6.24587
Trim59	0.100786	5.63524	0.490694	0.628026	0.829723	-6.20897
Kpna4	-0.0346794	7.0199	-0.302054	0.765171	0.899008	-6.28386
Ppm1l	-0.199231	3.3059	-0.46719	0.644509	0.839037	-6.22022
Nmd3	-0.0944879	5.10999	-0.433102	0.668745	0.852016	-6.23556
Pdcd10	0.053239	7.52863	0.319822	0.751826	0.892272	-6.27831
Serpini1	1.62547	2.43391	5.34432	1.65383e-05	0.00227893	3.05803
Golim4	0.539395	5.24913	1.28643	0.210364	0.534456	-5.52316
Rapgef2	0.197482	6.18372	1.17864	0.249906	0.571004	-5.64904
4921511C10Rik	0.586837	2.17483	1.83935	0.0780624	0.347608	-4.73541
Fnip2	0.448187	5.80082	2.18586	0.0386459	0.246262	-4.13581
Ppid	-0.122294	6.34692	-0.71875	0.479122	0.740462	-6.07207
Etfdh	0.230546	4.1502	0.651404	0.520874	0.763752	-6.1177
4930579G24Rik	0.715233	3.81009	1.72356	0.0974374	0.381921	-4.91875
Tmem144	1.02977	2.51632	3.12425	0.0045532	0.0716182	-2.21343
Ctso	1.30923	3.17889	3.27238	0.00317561	0.0566804	-1.88112
Plrg1	0.45186	4.5112	1.22249	0.233198	0.556069	-5.599
Tlr2	0.141801	4.99115	0.674719	0.506198	0.757146	-6.10239
Tmem131l	0.327091	6.26179	1.33591	0.193906	0.518105	-5.46218
Mnd1	0.20576	3.61382	0.538451	0.595144	0.810962	-6.18446
Arfip1	0.665586	4.84025	1.62381	0.117267	0.416419	-5.06925
Gm37240	0.280293	3.30308	0.864563	0.395699	0.689486	-5.95868
Tmem154	0.923951	4.95157	2.22839	0.0353168	0.233836	-4.05738
Fbxw7	0.188997	5.75461	0.764365	0.451979	0.726863	-6.03873
Gatb	0.485487	3.84389	1.15943	0.257501	0.57676	-5.67046
Sh3d19	1.44	2.59282	4.67959	9.0309e-05	0.00592086	1.45499
Rps3a1	-0.0322267	11.367	-0.322428	0.749875	0.891308	-6.27747
Lrba	0.972948	5.15755	2.95189	0.00688132	0.0932286	-2.59211
Cd1d1	0.182173	3.37921	0.549892	0.587392	0.807599	-6.17826
Fcrls	1.53716	2.01335	7.9957	2.82685e-08	9.90884e-05	9.01322
Fcrl1	1.69994	3.99126	3.67774	0.00116092	0.0304308	-0.945782
Etv3	0.658397	3.97456	1.77588	0.0882271	0.367956	-4.83704
Arhgef11	0.464078	4.91573	2.44181	0.0222226	0.182056	-3.64952
Prcc	0.229047	4.79535	0.580606	0.56683	0.79431	-6.16098
Hdgf	-0.108078	8.21387	-0.997777	0.32818	0.638818	-5.83802
Mrpl24	0.336202	6.51174	2.13299	0.0431775	0.260329	-4.23192
Rrnad1	0.0748778	3.59061	0.200156	0.843018	0.934203	-6.3096
Isg20l2	0.571414	4.98484	1.46856	0.154726	0.47139	-5.28902
Gpatch4	0.321744	4.7431	0.742617	0.464803	0.734353	-6.05487
Naxe	0.286529	5.20413	0.949714	0.35157	0.657772	-5.8834
Iqgap3	-0.0526944	4.44895	-0.138995	0.890595	0.953582	-6.32004
Mef2d	0.253883	5.91711	1.49741	0.147113	0.459019	-5.24956
Tsacc	1.14705	2.44386	3.55501	0.0015786	0.0357641	-1.2324
Cct3	0.0486488	7.28246	0.162901	0.871938	0.947554	-6.31641
Glmp	0.281523	5.545	1.39324	0.176111	0.497112	-5.38905
Smg5	-0.153258	4.61421	-0.657038	0.517306	0.761776	-6.11404
Pmf1	-0.260635	5.9655	-1.55414	0.133027	0.44269	-5.1701
Slc25a44	0.105803	4.37736	0.276394	0.784573	0.90774	-6.29132
Sema4a	0.512644	6.11968	2.61114	0.0151998	0.145457	-3.31033
Lmna	0.760465	4.46205	1.92929	0.0654031	0.319709	-4.58689
Lamtor2	0.405199	8.10254	2.93246	0.00720578	0.0950148	-2.63419
Ubqln4	-0.287461	3.99781	-0.99692	0.328587	0.639002	-5.83885
Ssr2	-0.377196	7.39428	-2.62996	0.0145627	0.141862	-3.27186
Arhgef2	0.272961	5.8802	1.5616	0.131259	0.439869	-5.15946
Khdc4	-0.115682	5.61109	-0.736044	0.468721	0.735878	-6.05966
Rit1	0.219933	5.45669	0.961113	0.345923	0.652796	-5.87282
Syt11	2.27585	3.21223	5.8423	4.7166e-06	0.00111609	4.2414
1500004A13Rik	0.879991	2.32439	2.63988	0.0142368	0.140071	-3.25151
Gon4l	-0.100155	5.71278	-0.472079	0.641065	0.836459	-6.21792
Msto1	0.363792	3.22333	0.903638	0.375022	0.674804	-5.92495
Dap3	-0.240259	6.6091	-1.70615	0.100677	0.387292	-4.94552
Ash1l	-0.00453131	7.28447	-0.0347705	0.972546	0.988365	-6.32917
Rusc1	0.413068	3.62907	1.21502	0.235985	0.558286	-5.60765
Fdps	-0.0320195	7.242	-0.159527	0.874567	0.94845	-6.31695
Clk2	0.498245	4.96321	1.12803	0.270277	0.589914	-5.70478
Scamp3	0.163698	5.79467	0.945833	0.353507	0.659342	-5.88697
Fam189b	0.402421	3.44027	0.978028	0.337658	0.648213	-5.85691
Gba	0.343495	3.99696	0.953575	0.349651	0.656018	-5.87983
Mtx1	-0.190948	5.34357	-1.04281	0.307257	0.620553	-5.79363
Trim46	1.02466	2.20229	3.43157	0.00214574	0.0448662	-1.51787
Krtcap2	0.147563	8.3578	1.00029	0.326988	0.637986	-5.83559
Dpm3	0.217249	6.72568	0.828629	0.415346	0.705042	-5.98846
Slc50a1	0.959547	5.2408	3.70449	0.00108542	0.0290123	-0.882969
Adam15	0.599459	4.61415	1.57162	0.128917	0.435691	-5.14513
Zbtb7b	0.968623	4.09311	2.23678	0.0346918	0.231393	-4.0418
Gm15417	0.649469	2.13481	2.0453	0.0517519	0.285597	-4.38777
Flad1	0.0385794	3.47069	0.11562	0.9089	0.961996	-6.32304
Cks1b	0.0254055	8.04487	0.165846	0.869645	0.94722	-6.31592
Shc1	-0.156862	5.47737	-1.06257	0.298381	0.612619	-5.77359
Pygo2	0.583359	3.92697	1.7965	0.0848066	0.360339	-4.80432
Pbxip1	0.902712	5.32769	2.26403	0.0327303	0.223812	-3.99092
Pmvk	-0.0829655	4.9364	-0.298594	0.767778	0.900174	-6.2849
Adar	0.889579	5.0444	2.06774	0.0494242	0.278914	-4.34832
Ube2q1	-0.0283113	6.85036	-0.181571	0.857419	0.940725	-6.31317
Il6ra	0.0477191	7.39112	0.311476	0.758084	0.895183	-6.28096
Atp8b2	0.901113	3.19931	2.40175	0.0242747	0.190909	-3.72782
Hax1	0.110353	5.17398	0.602008	0.552722	0.786332	-6.14841
Ubap2l	-0.0155009	6.79528	-0.115515	0.908982	0.961996	-6.32305
4933434E20Rik	-0.0235264	4.99484	-0.106587	0.915988	0.965357	-6.32405
1700094D03Rik	0.241062	1.89313	0.816365	0.42219	0.709439	-5.99835
Tpm3	-0.0832183	9.35516	-1.01495	0.32009	0.632371	-5.82131
Nup210l	0.746298	3.81833	1.77356	0.0886189	0.368323	-4.8407
Rps27	-0.11284	8.97337	-0.445839	0.659644	0.847339	-6.22996
Rab13	0.583941	2.34598	1.76566	0.089964	0.371637	-4.85314
Jtb	0.0393343	5.83438	0.231846	0.818591	0.921987	-6.3027
Slc39a1	0.457469	3.60538	1.13758	0.266342	0.584499	-5.69443
Crtc2	-0.362582	3.13997	-1.11774	0.274563	0.593081	-5.71584
Dennd4b	0.449043	4.35085	1.19903	0.242032	0.564649	-5.62598
Gatad2b	0.241778	6.17879	1.19362	0.244103	0.565896	-5.63214
Ints3	0.361864	4.49037	0.924961	0.364044	0.665361	-5.90596
Ilf2	0.170882	6.79631	1.0062	0.324193	0.635285	-5.82985
Snapin	0.297978	4.64294	0.793986	0.434858	0.715912	-6.01604
Chtop	0.47991	5.53585	1.13226	0.268528	0.587717	-5.7002
S100a1	0.171306	5.69017	1.12477	0.271631	0.591109	-5.7083
S100a13	0.230544	6.90222	1.37605	0.181305	0.502047	-5.41124
S100a4	0.494141	9.52393	2.10082	0.0461636	0.270345	-4.28962
S100a6	0.855196	11.1414	3.04894	0.00545838	0.0815744	-2.38001
S100a8	1.27372	11.9441	3.03938	0.00558497	0.0819737	-2.40103
S100a9	1.34189	11.6682	3.38832	0.00238793	0.0479885	-1.61713
S100a11	0.552847	9.7544	4.05664	0.000444822	0.0164191	-0.0470785
S100a10	0.381726	10.0868	2.99787	0.00616789	0.0872671	-2.492
Them4	0.906948	2.45309	2.60502	0.015413	0.146849	-3.32283
Mrpl9	0.414925	5.42195	0.985565	0.334019	0.645781	-5.84974
Snx27	0.13063	5.88711	0.658495	0.516386	0.761601	-6.1131
Pogz	0.39033	4.67909	1.07199	0.294214	0.610482	-5.76392
Psmb4	0.146503	8.18772	0.924902	0.364074	0.665361	-5.90601
Selenbp1	-0.365677	4.17732	-0.943204	0.354822	0.660016	-5.88939
Rfx5	0.216042	2.8768	0.508025	0.615998	0.823658	-6.20034
Pi4kb	0.489384	4.34487	1.29823	0.206345	0.529726	-5.5088
Zfp687	-0.0534248	3.3658	-0.149771	0.882176	0.950082	-6.31847
Psmd4	0.116162	7.43706	0.88882	0.382778	0.679632	-5.93791
Pip5k1a	0.184031	4.98557	0.802793	0.429845	0.712708	-6.00913
Vps72	-0.41298	5.33426	-2.08383	0.0478134	0.274245	-4.31985
Scnm1	0.384951	4.04734	0.987938	0.332879	0.644726	-5.84748
Lysmd1	0.644832	2.36601	1.91634	0.0671074	0.322806	-4.60859
Tnfaip8l2	0.100655	6.01953	0.497796	0.623085	0.827607	-6.20547
Gabpb2	-0.213071	6.29654	-1.48476	0.150412	0.465753	-5.26694
Gm16740	0.717981	1.95104	2.56746	0.0167808	0.15445	-3.39906
Mllt11	-0.0582663	2.75492	-0.163447	0.871513	0.947323	-6.31632
Cdc42se1	-0.169522	7.34485	-1.15996	0.257288	0.576587	-5.66987
Prune1	0.416728	4.38795	1.65943	0.109829	0.40356	-5.01632
Mindy1	0.166462	4.94518	0.873612	0.390846	0.685212	-5.95099
Anxa9	0.687379	2.30153	2.24833	0.033848	0.228953	-4.02029
6330562C20Rik	1.01733	3.27646	2.53919	0.0178845	0.160789	-3.45604
Cers2	0.626589	6.06577	1.34353	0.191461	0.515952	-5.4526
Setdb1	-0.257207	5.41838	-1.39347	0.176042	0.497112	-5.38875
Arnt	0.467532	5.23487	1.13424	0.267716	0.586208	-5.69806
Ctss	0.0503434	9.44748	0.239402	0.812793	0.919178	-6.30091
Golph3l	0.488355	4.59465	1.27432	0.214551	0.538346	-5.53778
Ensa	-0.114409	5.36181	-0.681736	0.501826	0.754729	-6.09768
Mcl1	-0.254218	7.99017	-1.59189	0.124283	0.427892	-5.11589
Ecm1	-0.165997	1.97102	-0.489203	0.629067	0.83049	-6.2097
Tars2	-0.124335	3.72186	-0.334782	0.74065	0.887352	-6.27339
Rprd2	0.0553182	6.14019	0.387771	0.701548	0.86612	-6.25419
Prpf3	0.25881	4.85496	0.681153	0.502188	0.754729	-6.09807
Mrps21	-0.0246661	7.26648	-0.139051	0.890551	0.953582	-6.32003
C920021L13Rik	0.200777	2.01712	0.569852	0.573988	0.798886	-6.16714
BC028528	0.933664	5.96041	2.00131	0.0565984	0.297292	-4.46424
Aph1a	-0.26136	6.34786	-1.93371	0.0648295	0.31846	-4.57945
Anp32e	-0.132702	8.55268	-1.16424	0.255583	0.574335	-5.66512
Plekho1	-0.137543	6.14224	-0.533062	0.598813	0.812777	-6.18734
Vps45	0.789838	4.04362	2.08197	0.0479972	0.274863	-4.32315
Otud7b	1.88104	3.42533	4.16788	0.000334925	0.0139864	0.219668
Sf3b4	-0.214246	6.21908	-1.50613	0.144872	0.456092	-5.2375
Bola1	0.11399	5.07162	0.359613	0.72223	0.877086	-6.26474
Hist2h2ab	-0.16616	2.20578	-0.510365	0.614382	0.822511	-6.19915
Hist2h2ac	-0.096483	7.37808	-0.544145	0.59128	0.809344	-6.18139
Hist2h2be	0.450754	2.10526	1.4906	0.148881	0.462939	-5.25893
Hist2h2aa1	0.700211	4.3912	1.58751	0.125271	0.430068	-5.12223
Hist2h4	-0.231631	2.852	-0.629282	0.535012	0.773921	-6.13174
Hist2h3b	-0.0123196	2.11828	-0.0353759	0.972068	0.988255	-6.32915
Hist2h2bb	-0.0819328	4.99398	-0.31128	0.758231	0.895226	-6.28102
Fcgr1	0.20064	5.5668	0.897814	0.378058	0.676937	-5.93007
Txnip	0.09368	6.75626	0.44307	0.661618	0.848285	-6.23119
Polr3gl	0.984128	4.46349	2.69258	0.0126179	0.129303	-3.14277
Rbm8a	-0.0374864	7.95566	-0.258141	0.798463	0.913458	-6.29622
Pex11b	-0.446902	3.93304	-1.80944	0.0827189	0.355511	-4.78364
Pias3	0.237932	3.22096	0.517143	0.609713	0.820613	-6.19567
Polr3c	0.184447	5.29978	0.437574	0.665544	0.851306	-6.23361
Rnf115	0.160513	6.57599	1.29282	0.20818	0.531445	-5.5154
Gpr89	-0.00879692	4.65184	-0.0365543	0.971138	0.987744	-6.32911
Acp6	0.546855	3.67422	1.52397	0.140373	0.450822	-5.21266
Bcl9	0.590109	3.46591	1.69043	0.103683	0.391531	-4.96952
Chd1l	1.02936	3.94747	2.57321	0.0165642	0.153506	-3.38742
Fmo5	0.616919	3.25538	1.42579	0.166598	0.486468	-5.34637
Prkab2	0.300132	3.317	0.698632	0.491387	0.747482	-6.08615
Pde4dip	1.02149	3.57577	2.67375	0.0131753	0.132633	-3.18174
Sec22b	-0.13554	6.21067	-0.889377	0.382485	0.679632	-5.93742
Notch2	-0.107902	6.93711	-0.630187	0.53443	0.773869	-6.13117
Phgdh	0.752653	6.02904	1.48473	0.150421	0.465753	-5.26699
Wars2	0.11835	3.74611	0.313758	0.756372	0.894187	-6.28024
Wdr3	-0.226698	5.90089	-1.20233	0.240774	0.563081	-5.62221
Gdap2	0.194728	4.68809	0.891158	0.381548	0.679005	-5.93587
Tent5c	0.683884	1.90543	2.32219	0.0288762	0.20988	-3.88099
Man1a2	0.37231	5.71011	2.15245	0.0414569	0.25504	-4.19673
Gm43462	-0.250258	2.71471	-0.600125	0.553956	0.787196	-6.14953
Trim45	1.14221	2.82628	3.70897	0.00107326	0.0288292	-0.872438
Ttf2	-0.0558653	5.20237	-0.340219	0.736603	0.884935	-6.27155
Cd101	1.86714	3.08466	4.64613	9.83985e-05	0.00635607	1.37402
Ptgfrn	1.11064	2.4185	3.40257	0.00230531	0.0469643	-1.58446
Atp1a1	-0.0110486	6.76032	-0.0843152	0.933494	0.972569	-6.3262
Slc22a15	0.461777	5.37515	2.41397	0.0236312	0.187807	-3.70403
Tspan2	1.63499	3.47264	4.23401	0.000282852	0.01258	0.378663
Sike1	-0.249284	5.34565	-1.44658	0.160739	0.479926	-5.31867
Csde1	0.0595863	7.61965	0.479907	0.635567	0.834236	-6.2142
Nras	-0.0343761	5.62185	-0.185262	0.854555	0.93958	-6.31249
Dennd2c	0.39909	3.09579	1.02364	0.316048	0.629081	-5.81275
Bcas2	-0.054409	7.20059	-0.446585	0.659113	0.847272	-6.22963
Trim33	0.246343	6.28917	1.59761	0.123	0.426122	-5.10758
Hipk1	0.222839	6.66999	1.43308	0.164523	0.4849	-5.33668
Gm43149	-0.0113623	2.08526	-0.0351739	0.972227	0.988255	-6.32916
Dclre1b	0.0275572	4.56038	0.113935	0.910222	0.962265	-6.32324
Ap4b1	0.248553	3.22847	0.806936	0.427499	0.71202	-6.00586
Ptpn22	-0.0541806	5.91721	-0.254192	0.801477	0.914897	-6.29724
Gm15472	0.266361	2.16666	0.812095	0.424589	0.710626	-6.00176
Gm43065	0.176912	1.89963	0.641611	0.527108	0.769979	-6.12397
Rsbn1	0.599209	6.03379	1.30515	0.204015	0.527778	-5.50032
Phtf1	0.0681528	4.74922	0.226224	0.822912	0.92383	-6.304
Magi3	0.577532	5.01154	1.47643	0.152619	0.468522	-5.27833
Lrig2	0.933638	4.13709	2.62168	0.0148399	0.14366	-3.28881
Gm43696	0.752142	2.61377	2.10192	0.0460585	0.270041	-4.28766
A530041M06Rik	0.237343	1.92757	0.870682	0.392413	0.686628	-5.95349
4930509H03Rik	0.162713	2.24758	0.425813	0.673976	0.853851	-6.23869
Slc16a1	0.72108	4.47229	1.83396	0.0788842	0.349859	-4.74414
Mov10	0.00808283	3.24596	0.0200285	0.984184	0.993522	-6.32958
Capza1	0.262077	8.07105	1.88866	0.0708805	0.331263	-4.65462
Gm42658	0.0239289	2.17371	0.0665246	0.947502	0.977849	-6.32755
Gm42659	0.0315283	2.79354	0.0941581	0.925753	0.969436	-6.32531
St7l	0.0424713	4.86496	0.148838	0.882904	0.950112	-6.31861
Cttnbp2nl	1.25095	2.76677	3.64687	0.00125444	0.0319559	-1.01811
Ddx20	0.162234	4.00865	0.436137	0.666571	0.851439	-6.23424
Gm43848	0.661767	2.20745	2.01466	0.0550871	0.294344	-4.44116
Rap1a	0.0147914	8.43985	0.128243	0.899008	0.957734	-6.32149
Gm43328	0.370864	2.65334	0.965116	0.343955	0.652097	-5.86908
Gm43329	-0.104481	2.58635	-0.262943	0.794802	0.912156	-6.29497
Gm43331	0.219278	2.38492	0.650601	0.521384	0.763931	-6.11821
Gm5547	0.995365	2.239	2.69894	0.0124345	0.128137	-3.12956
Adora3	1.80623	3.60715	5.02484	3.73147e-05	0.00346102	2.28959
I830077J02Rik	0.585977	6.04298	1.27868	0.213038	0.536277	-5.53254
Atp5f1	-0.0125012	8.84791	-0.126758	0.900171	0.958369	-6.32168
Wdr77	0.450365	4.50546	1.08608	0.288058	0.604948	-5.74931
Chil3	-0.87702	8.13113	-2.78559	0.0101747	0.114421	-2.94812
Dennd2d	0.450194	3.97822	1.1895	0.245689	0.566951	-5.63681
Cept1	0.460279	5.86147	1.01318	0.320915	0.633156	-5.82304
Dram2	0.153351	5.38615	0.740283	0.466192	0.734731	-6.05658
Lrif1	0.690401	4.4641	1.88587	0.0712709	0.331814	-4.65923
Cd53	0.130975	7.52798	0.955276	0.348807	0.655021	-5.87825
AI504432	0.927737	3.49013	2.39779	0.0244868	0.192141	-3.73552
Lamtor5	0.0942565	7.20567	0.800406	0.4312	0.713651	-6.01101
Rbm15	0.266097	4.40649	0.724698	0.47553	0.738044	-6.06783
Strip1	0.445654	3.9975	1.29759	0.206562	0.529765	-5.50958
Ahcyl1	0.0375658	5.41469	0.167013	0.868736	0.946508	-6.31572
Gstm5	0.23613	3.73789	0.541173	0.593295	0.809738	-6.183
Gstm1	0.228618	6.95366	1.02251	0.316571	0.629385	-5.81386
Gstm4	1.10074	2.95022	2.98907	0.00629864	0.0880742	-2.5112
Ampd2	0.913617	3.88091	2.10639	0.0456338	0.268994	-4.27968
Gnai3	0.47232	7.02662	2.27458	0.0319977	0.221171	-3.9711
Cyb561d1	-0.0813383	2.07594	-0.203959	0.840077	0.932866	-6.30882
Atxn7l2	0.331916	1.85215	1.21197	0.23713	0.559177	-5.61116
Psma5	-0.0877342	8.15994	-0.55758	0.582211	0.804018	-6.17402
Sort1	-0.125999	6.64968	-0.803507	0.42944	0.712563	-6.00857
Psrc1	-0.108806	3.37748	-0.284095	0.778734	0.905117	-6.28915
Sars	-0.0481843	5.96822	-0.243568	0.809602	0.918386	-6.2999
Tmem167b	0.528312	3.41849	1.36427	0.184935	0.50696	-5.42633
Taf13	0.291892	4.9552	1.34067	0.192376	0.517132	-5.4562
Wdr47	0.494865	2.79456	1.40092	0.173827	0.495364	-5.37904
Clcc1	0.0956841	5.12563	0.354324	0.72614	0.879899	-6.26664
Gpsm2	0.527896	4.83625	1.42799	0.16597	0.486165	-5.34345
Stxbp3	0.79733	5.5701	1.79884	0.0844252	0.360083	-4.80058
Prpf38b	0.00841305	7.00566	0.0734005	0.942086	0.975683	-6.32706
Fam102b	1.17866	4.63937	3.35208	0.00261118	0.0498979	-1.69999
Slc25a24	0.210635	5.92217	1.29888	0.206127	0.529567	-5.50801
Vav3	0.373929	8.13075	3.18737	0.00390736	0.0644417	-2.07256
Prmt6	0.405645	2.88496	1.2244	0.23249	0.555479	-5.59679
Amy1	0.294527	2.20401	0.912621	0.370371	0.670101	-5.917
Rnpc3	0.252005	5.0994	1.47678	0.152525	0.468368	-5.27784
A930005H10Rik	0.532483	2.72204	1.40678	0.172103	0.493687	-5.37139
Dph5	0.213779	4.36586	0.544425	0.59109	0.809344	-6.18124
Slc30a7	0.227166	5.41277	1.05653	0.301074	0.61507	-5.77975
Extl2	-0.171476	3.72293	-0.531541	0.59985	0.813493	-6.18815
Vcam1	1.30809	2.1663	4.54422	0.000127784	0.00784448	1.12746
Cdc14a	0.754283	5.50858	5.2365	2.1751e-05	0.00265216	2.79933
Rtca	0.750318	4.46776	1.96206	0.061258	0.310192	-4.53148
Dbt	0.141215	4.02066	0.491275	0.627621	0.829392	-6.20869
Trmt13	-0.187037	4.75438	-0.805102	0.428537	0.712496	-6.00731
Sass6	-0.274492	6.16013	-2.02225	0.0542437	0.292704	-4.42799
Mfsd14a	0.34994	5.48395	2.12898	0.0435401	0.26134	-4.23914
Slc35a3	0.657312	5.06647	1.64932	0.111898	0.406126	-5.03143
Agl	0.272811	4.57481	1.06856	0.295726	0.611187	-5.76745
Frrs1	0.245692	6.83357	1.82955	0.0795635	0.351019	-4.75129
Snx7	0.40806	3.59283	1.01315	0.320932	0.633156	-5.82307
Ptbp2	0.196964	6.02141	1.28225	0.211805	0.53535	-5.52823
Tmem56	0.156085	2.48392	0.424528	0.6749	0.854144	-6.23924
Alg14	0.140145	4.29917	0.559553	0.580885	0.803725	-6.17293
Cnn3	1.06062	3.92884	2.66504	0.0134411	0.134436	-3.19974
Abcd3	0.971965	4.34421	2.63845	0.0142835	0.140275	-3.25445
Gclm	0.317913	6.53429	1.52162	0.140958	0.451632	-5.21594
Gm17494	-0.131302	2.20945	-0.449574	0.656986	0.846144	-6.22829
Dnttip2	0.447683	5.78794	1.00281	0.325794	0.636569	-5.83315
Fnbp1l	1.14562	3.96473	2.96968	0.00659635	0.0904975	-2.55344
Pde5a	1.35456	3.80438	3.5981	0.00141747	0.0338075	-1.13208
1810037I17Rik	0.335857	7.48045	1.54885	0.134292	0.444176	-5.17761
Usp53	0.63396	3.77572	1.84659	0.0769711	0.345019	-4.72366
Sec24d	1.17739	4.26112	3.56587	0.0015364	0.0353991	-1.20716
Mettl14	0.610956	4.28376	1.69137	0.103501	0.391531	-4.96808
Snhg8	0.165501	5.70415	0.34031	0.736535	0.884935	-6.27152
Camk2d	0.267646	7.88463	1.72634	0.0969277	0.381556	-4.91445
Ank2	1.11459	2.04328	3.24707	0.00337833	0.0583783	-1.9383
Larp7	-0.0676666	5.98235	-0.419954	0.678194	0.856184	-6.24117
Zgrf1	0.570854	4.67911	1.52187	0.140895	0.451632	-5.21559
Alpk1	0.599622	5.6905	1.36408	0.184995	0.50696	-5.42657
Tifa	0.255962	5.99602	1.36684	0.184138	0.505791	-5.42304
Ap1ar	-0.229443	5.19262	-1.33844	0.193093	0.517635	-5.45901
Fam241a	0.223558	6.30191	1.06585	0.296925	0.611533	-5.77024
Elovl6	0.595724	5.55008	1.42267	0.16749	0.487725	-5.35048
Gar1	-0.123628	6.28578	-0.667769	0.510548	0.759451	-6.10701
Pla2g12a	0.996997	4.68908	2.63168	0.0145056	0.141687	-3.26833
Casp6	0.842707	4.79474	2.1235	0.0440395	0.263315	-4.24899
Mcub	0.295392	6.73313	1.35198	0.188781	0.51229	-5.44194
Sec24b	0.377026	6.03174	0.791561	0.436244	0.716854	-6.01792
Ostc	0.2185	8.26082	1.32942	0.196006	0.520775	-5.47029
Rpl34	0.0456958	10.7103	0.280616	0.781371	0.906407	-6.29014
Hadh	0.151265	4.97068	0.360992	0.721212	0.876519	-6.26425
Sgms2	1.27641	5.82037	2.8264	0.00925028	0.108838	-2.86167
Papss1	-0.449527	4.82503	-2.10921	0.0453677	0.268043	-4.27463
Aimp1	-0.173977	6.71494	-1.09772	0.28304	0.600362	-5.7371
Tbck	0.0716235	5.12837	0.313885	0.756276	0.894187	-6.2802
Gstcd	0.0700919	5.04988	0.312845	0.757057	0.894846	-6.28053
Ints12	0.0327685	4.87441	0.172149	0.86474	0.944075	-6.31485
Ppa2	-0.172729	4.80918	-0.408206	0.686682	0.860096	-6.24605
Tet2	-0.0573922	6.87647	-0.395126	0.696183	0.863561	-6.25131
Cenpe	0.0301876	7.37423	0.155898	0.877396	0.948997	-6.31753
Cisd2	0.251214	7.004	1.14946	0.261509	0.579992	-5.68145
Ube2d3	0.0517375	8.33827	0.349847	0.729455	0.881336	-6.26822
Manba	-0.165527	5.0281	-0.855135	0.400795	0.69391	-5.96661
Nfkb1	0.0999774	7.58947	0.638046	0.529387	0.770817	-6.12623
Slc39a8	1.24492	2.67875	3.39551	0.0023459	0.0473191	-1.60065
Bank1	1.82864	5.50614	3.77632	0.000905721	0.0261029	-0.713755
Ppp3ca	0.191189	8.09279	1.60028	0.122405	0.425649	-5.1037
H2afz	-0.15416	11.5075	-1.60365	0.121658	0.424376	-5.09879
Dnajb14	-0.0873023	5.68879	-0.392471	0.698118	0.864245	-6.25236
Lamtor3	-0.286803	5.94659	-1.94201	0.063765	0.31626	-4.56545
Dapp1	0.103263	6.72269	0.581006	0.566565	0.794249	-6.16075
Mttp	1.09554	2.22137	4.24253	0.000276751	0.0124618	0.399189
Trmt10a	0.393863	3.47394	0.924706	0.364174	0.665361	-5.90619
Adh5	-0.379061	6.40774	-2.61565	0.0150448	0.144484	-3.30113
Metap1	0.505032	4.40868	1.24152	0.226216	0.550054	-5.57679
Eif4e	-0.208442	6.9238	-1.59072	0.124546	0.428389	-5.11758
Tspan5	-0.0544569	6.86944	-0.467584	0.644231	0.838877	-6.22003
Rap1gds1	0.292265	7.08865	1.72177	0.0977662	0.382129	-4.92151
Pdlim5	0.164725	6.34831	1.07054	0.294851	0.610867	-5.76541
Gbp5	0.549556	4.00259	1.38327	0.179107	0.500173	-5.40194
Gbp7	0.570459	5.16991	1.32277	0.198177	0.522247	-5.47857
Gbp3	0.832876	4.49619	2.21651	0.0362198	0.23721	-4.07939
Gbp2	0.924169	4.5349	2.2483	0.0338502	0.228953	-4.02034
Kyat3	0.0575728	4.18927	0.222244	0.825974	0.925404	-6.3049
Gtf2b	0.488718	6.2904	1.00064	0.32682	0.637887	-5.83525
Pkn2	0.0136003	6.44625	0.0784251	0.938129	0.974685	-6.32668
4930519L02Rik	1.65134	2.3701	4.76017	7.3458e-05	0.00531444	1.64995
Lmo4	0.187203	7.04373	1.22776	0.231249	0.55483	-5.59288
Hs2st1	-0.0877224	5.6449	-0.491594	0.6274	0.829392	-6.20853
Selenof	0.154164	7.84743	1.15045	0.261108	0.57993	-5.68036
Sh3glb1	0.067968	8.02714	0.492159	0.627006	0.829283	-6.20825
Odf2l	-0.0347879	4.38112	-0.15164	0.880717	0.949989	-6.31819
Znhit6	0.335298	4.60953	0.852645	0.402148	0.695476	-5.96869
Bcl10	0.65384	6.06338	1.34865	0.189833	0.513861	-5.44614
2410004B18Rik	-0.056771	4.81598	-0.261517	0.795889	0.912156	-6.29534
Mcoln2	0.864369	2.40405	2.9204	0.00741464	0.0964793	-2.66027
Ssx2ip	0.476149	3.77987	1.12812	0.27024	0.589914	-5.70468
Ctbs	0.674195	4.05411	1.80212	0.0838942	0.358449	-4.79535
Spata1	0.797336	3.31783	1.96757	0.0605843	0.307906	-4.5221
Gng5	0.185925	8.94587	1.36218	0.185583	0.50793	-5.42898
Rpf1	-0.0946645	5.56962	-0.580399	0.566967	0.79431	-6.1611
Prkacb	0.61905	5.24325	1.55318	0.133254	0.442902	-5.17145
Adgrl2	0.250835	2.5019	0.664122	0.51284	0.759669	-6.10941
Adgrl4	1.74427	3.62664	4.42741	0.000172391	0.0094047	0.845091
Dnajb4	0.934669	4.03172	2.16937	0.0400111	0.250961	-4.16596
Fubp1	-0.193482	7.29769	-1.59921	0.122644	0.425897	-5.10526
Miga1	0.612984	2.83604	1.47032	0.154253	0.470607	-5.28663
Usp33	-0.0893734	5.10046	-0.453952	0.653875	0.845046	-6.22631
Zzz3	-0.063984	5.63372	-0.400333	0.692395	0.862572	-6.24923
Pigk	-0.0848265	5.74637	-0.493938	0.625767	0.828654	-6.20738
[truncated: 8,853 more rows]

## Sheet: DGE_Hdac1_neutrophil
gene	logFC	AveExpr	t	P.Value	adj.P.Val	B
Mrpl15	-0.0872203	6.34607	-0.351043	0.728615	0.846645	-6.19869
Lypla1	-1.08055	5.48339	-2.60681	0.0154543	0.127494	-3.26962
Tcea1	-0.629851	6.70057	-1.2549	0.221581	0.454698	-5.49532
Atp6v1h	-0.107505	4.95093	-0.335209	0.740375	0.854345	-6.20412
Rb1cc1	-0.920831	6.12513	-3.22173	0.00363925	0.0617459	-1.95892
4732440D04Rik	-0.569089	2.58118	-1.99331	0.0576971	0.237888	-4.41918
Pcmtd1	-1.09934	4.89608	-2.31595	0.0294082	0.172381	-3.83846
Rrs1	-0.780632	4.63485	-1.54214	0.136105	0.352296	-5.12359
Adhfe1	-0.475619	2.61439	-1.48616	0.150238	0.372718	-5.20104
Mybl1	-0.0444275	2.98564	-0.126607	0.900304	0.951735	-6.25237
Vcpip1	-0.349554	5.44614	-1.58267	0.126568	0.340774	-5.06606
Sgk3	-0.189425	6.79944	-1.00916	0.322952	0.552699	-5.75992
Mcmdc2	-0.68539	2.40005	-2.40616	0.0241692	0.157462	-3.66626
Snhg6	0.487792	4.76157	1.0621	0.298745	0.531182	-5.70728
Ppp1r42	-2.20029	4.4309	-4.27827	0.000259595	0.0166587	0.490398
Cops5	-0.191755	5.8195	-0.410515	0.685065	0.820303	-6.17609
Cspp1	-0.556964	6.16187	-1.19515	0.243689	0.475716	-5.56436
Arfgef1	-0.253956	8.21782	-1.30703	0.203571	0.434713	-5.4327
Cpa6	-1.53318	4.5033	-3.34515	0.0026935	0.0556087	-1.6824
Ncoa2	-0.323032	6.54621	-1.57043	0.129388	0.344773	-5.08356
Tram1	-0.520409	7.08951	-1.7881	0.0863749	0.285051	-4.75649
Lactb2	-0.397077	4.17261	-0.862969	0.396684	0.615239	-5.89232
Terf1	-0.693818	5.35883	-1.66426	0.109045	0.315188	-4.94664
Rpl7	-0.275676	10.1532	-0.880494	0.387311	0.608658	-5.87746
Rdh10	0.0310377	3.58099	0.0738248	0.941761	0.973885	-6.25768
Stau2	-0.117153	2.54596	-0.352553	0.727497	0.846268	-6.19816
Ube2w	-0.662277	6.03297	-1.32806	0.196634	0.426682	-5.40681
Eloc	-0.0115389	7.00708	-0.061865	0.951182	0.978193	-6.25849
Tmem70	-0.546998	4.12894	-1.23436	0.229001	0.461253	-5.51938
Ly96	-1.35699	2.69957	-5.02707	3.866e-05	0.00592767	2.27176
Mcm3	-0.852953	6.56373	-1.22174	0.233653	0.466835	-5.534
Tram2	-0.0608217	3.35699	-0.140098	0.88975	0.946093	-6.25056
Kcnq5	-0.807488	3.579	-1.6218	0.117892	0.329384	-5.00938
Ogfrl1	-0.241662	7.76776	-1.21276	0.237009	0.469492	-5.54432
Smap1	-0.264339	6.76913	-1.25186	0.222668	0.455604	-5.49891
Sdhaf4	-0.103885	3.75152	-0.218525	0.828865	0.909392	-6.23646
Lmbrd1	-0.676869	4.82835	-1.3441	0.191466	0.420632	-5.38682
Phf3	-0.298445	6.51366	-1.34378	0.191568	0.420638	-5.38722
Ptp4a1	-0.525226	2.42025	-2.00153	0.0567468	0.235793	-4.40511
Prim2	-0.499655	5.68852	-1.06026	0.299564	0.531731	-5.70915
Rab23	-0.56629	2.89886	-1.34134	0.192348	0.42129	-5.39028
Bag2	-0.326384	3.17024	-0.722092	0.477205	0.676952	-6.00147
Zfp451	-0.443473	4.73663	-0.882851	0.386062	0.607272	-5.87544
Gm37233	-0.493709	2.50018	-1.56077	0.131649	0.346944	-5.09729
Ccdc115	-0.68876	5.29807	-1.21122	0.237585	0.469883	-5.54608
Imp4	0.116142	4.89568	0.280131	0.781774	0.881868	-6.22107
Ptpn18	-0.199045	7.35712	-0.965652	0.343835	0.571545	-5.80132
Arhgef4	-0.26257	2.55398	-0.731271	0.471683	0.672736	-5.99492
Fam168b	-0.685943	5.57463	-1.59676	0.123386	0.336647	-5.04578
Plekhb2	0.11073	3.6899	0.248218	0.806074	0.896479	-6.22952
Hs6st1	-0.704115	2.70927	-2.22101	0.0360263	0.189439	-4.01526
Uggt1	-0.632523	5.91126	-1.30929	0.202815	0.433835	-5.42993
Neurl3	-0.907151	4.32861	-1.89305	0.0704533	0.260101	-4.58732
Arid5a	-0.435974	4.18381	-0.948042	0.352544	0.578193	-5.8176
Kansl3	-0.339059	4.12715	-0.776357	0.445112	0.65253	-5.96161
Lman2l	0.208737	5.02425	0.630796	0.534127	0.719167	-6.06229
Cnnm4	-0.796093	3.60634	-1.93025	0.065458	0.251425	-4.52566
Cnnm3	-0.231746	4.14428	-0.510754	0.614183	0.773981	-6.13014
Ankrd39	-0.125214	3.29109	-0.287045	0.776538	0.87918	-6.21911
Cox5b	-0.0786194	8.45495	-0.368122	0.716005	0.839051	-6.19256
Actr1b	-0.151171	3.64612	-0.363839	0.719159	0.84133	-6.19413
Tmem131	-0.828386	6.10244	-1.8015	0.0841842	0.281761	-4.7353
Gm38115	-0.747779	2.34021	-2.67855	0.0131269	0.120173	-3.12361
Inpp4a	-1.08703	5.72188	-2.47837	0.0206105	0.147197	-3.52561
Coa5	-0.208205	4.26528	-0.433442	0.668559	0.808903	-6.16645
Unc50	-1.00413	4.57967	-1.83	0.0796814	0.275679	-4.68982
Mgat4a	-0.671694	4.22007	-1.54175	0.136198	0.352296	-5.12413
Tsga10	-1.20081	2.6381	-3.75854	0.000965811	0.0353185	-0.733796
Mitd1	-0.695125	4.68597	-1.40615	0.172477	0.399106	-5.3076
Mrpl30	-0.528993	6.13546	-1.12249	0.272741	0.505401	-5.64428
Txndc9	-0.600821	6.15486	-1.30244	0.205108	0.436719	-5.43829
Eif5b	-0.0589931	6.49783	-0.223213	0.825256	0.907394	-6.23542
Rev1	-0.22688	6.55398	-0.748546	0.461394	0.665625	-5.98238
Aff3	-0.414819	3.40214	-0.788148	0.438315	0.646416	-5.95258
Gm16150	-0.835103	2.38529	-3.30342	0.002983	0.0581268	-1.77632
Pdcl3	-0.760756	5.45812	-1.84016	0.0781272	0.273367	-4.67348
Rpl31	-0.21709	8.75598	-0.6371	0.530082	0.715991	-6.05835
Tbc1d8	-0.993417	7.47726	-4.38348	0.000198648	0.0139957	0.740447
Cnot11	-0.45199	4.2064	-1.24677	0.224497	0.457032	-5.50489
Rnf149	-0.337426	5.30365	-1.05633	0.301318	0.532967	-5.71314
Map4k4	-0.705635	5.57207	-1.66799	0.108296	0.314536	-4.94107
Il1r2	-0.705514	6.49257	-2.10406	0.0460183	0.21321	-4.22641
Gm16894	-0.297663	2.95026	-0.687352	0.498441	0.693742	-6.02555
Il1rl2	-0.238171	3.59092	-0.516442	0.610265	0.771059	-6.12724
Il1rl1	-0.475163	2.23868	-1.89306	0.0704515	0.260101	-4.5873
Il18r1	-0.369977	4.04526	-0.91635	0.368587	0.590374	-5.8462
Il18rap	-0.864592	6.04343	-2.90087	0.00783711	0.0940338	-2.65858
Mrps9	-0.428169	5.52518	-0.98772	0.333129	0.562995	-5.78053
Tgfbrap1	-0.734848	3.08957	-2.03684	0.0528245	0.228121	-4.34426
AI597479	-0.39282	2.77227	-1.27318	0.215132	0.44885	-5.47361
Nck2	-0.53014	3.25622	-1.13687	0.266801	0.499353	-5.62882
Uxs1	-0.570568	4.75601	-1.12751	0.270659	0.503495	-5.63891
Tpp2	-0.0260928	6.09278	-0.127298	0.899764	0.951649	-6.25228
Tex30	-0.053238	4.93318	-0.130071	0.897592	0.95061	-6.25192
Poglut2	0.139515	3.11179	0.332643	0.742288	0.855571	-6.20498
Bivm	0.18027	2.82053	0.466813	0.644837	0.795116	-6.15149
Ercc5	-0.790385	2.5825	-2.81008	0.00969139	0.1046	-2.85066
Wdr75	0.280209	4.65877	0.63963	0.528463	0.715147	-6.05675
Slc40a1	-0.754639	6.6423	-3.23064	0.0035614	0.0610223	-1.93908
Slc39a10	0.0640148	2.8911	0.177418	0.860667	0.929591	-6.24462
Nabp1	-1.44467	4.15482	-3.1943	0.00388943	0.0637171	-2.01987
Myo1b	-0.579984	2.43056	-2.03087	0.0534702	0.22963	-4.3546
Stat4	-1.75866	5.08325	-3.7563	0.000971235	0.0353185	-0.738996
Stat1	-0.408288	6.99598	-1.65212	0.111517	0.318491	-4.96472
Gls	-0.214659	6.13084	-0.984942	0.334465	0.564226	-5.78317
Nab1	-1.2092	5.24566	-2.41905	0.0234947	0.155615	-3.64132
Nemp2	-0.652526	3.07031	-1.78345	0.0871467	0.285901	-4.76382
Mfsd6	-1.11708	4.89986	-2.823	0.00940426	0.103211	-2.82351
Inpp1	-0.771803	5.50494	-1.83223	0.0793367	0.275114	-4.68623
Hibch	-1.11816	4.84805	-2.45839	0.0215432	0.149842	-3.56476
Pms1	-0.181169	3.09629	-0.412622	0.683541	0.8192	-6.17523
Ormdl1	-0.0221607	4.87733	-0.0811617	0.935985	0.970569	-6.25711
Osgepl1	-1.2739	3.56065	-2.94471	0.00706767	0.0888973	-2.56483
Asnsd1	-1.26758	6.18963	-2.6422	0.0142618	0.124729	-3.19786
Stk17b	-1.40889	6.42267	-3.74281	0.00100466	0.0355155	-0.77041
Hecw2	-0.851843	2.30831	-3.34152	0.00271762	0.0557638	-1.69061
Gtf3c3	-0.0875482	3.18823	-0.249341	0.805215	0.895872	-6.22924
Ankrd44	-0.454597	7.88161	-2.34547	0.027589	0.167524	-3.78255
4930444A19Rik	-0.0404895	2.74166	-0.111382	0.912238	0.958373	-6.25419
Sf3b1	-0.341265	8.4141	-2.006	0.0562364	0.234804	-4.39745
Coq10b	-0.679547	4.7436	-1.85732	0.0755606	0.269764	-4.64571
Hspd1	0.242053	7.29797	0.735727	0.469017	0.670547	-5.99171
Hspe1	0.404942	6.92552	1.28833	0.209898	0.442899	-5.45542
Mob4	-0.718903	5.94036	-1.658	0.110314	0.316244	-4.95598
Mars2	-0.52206	2.48248	-1.66871	0.108152	0.314536	-4.94
1700066M21Rik	-0.739429	2.80692	-2.4524	0.0218305	0.151137	-3.57648
Tyw5	-0.0514111	3.2013	-0.141821	0.888404	0.945812	-6.25032
Maip1	-0.67466	4.02058	-1.37308	0.182403	0.410419	-5.3502
Kctd18	-0.670638	3.49366	-1.49033	0.149145	0.371036	-5.19534
Sgo2a	-0.81784	6.0236	-1.76829	0.0897048	0.289301	-4.78761
Bzw1	-0.0797995	7.82104	-0.499319	0.622095	0.779091	-6.13588
Clk1	-0.578928	6.64399	-2.6208	0.014972	0.126758	-3.2413
Ppil3	-0.851597	4.54015	-1.84853	0.0768665	0.272166	-4.65997
Nif3l1	-0.573543	3.14003	-1.49416	0.148147	0.369439	-5.19011
Orc2	0.262982	5.21989	0.579098	0.567911	0.741514	-6.09321
Fam126b	-0.877815	5.03629	-1.73339	0.0958384	0.298108	-4.84179
Ndufb3	-0.394902	7.28551	-1.28816	0.209954	0.442899	-5.45562
Cflar	-0.755149	6.32967	-3.51746	0.00176169	0.0458174	-1.29074
Casp8	-0.895329	5.40126	-1.674	0.107097	0.31353	-4.93208
Trak2	-1.71653	5.60597	-3.29582	0.00303883	0.0583165	-1.79336
Stradb	-0.698942	4.6878	-1.47914	0.152092	0.374561	-5.21059
Als2	-0.207414	2.98115	-0.553611	0.584959	0.753047	-6.10751
Sumo1	-0.319308	6.86998	-1.35017	0.189539	0.417978	-5.37921
Nop58	0.300073	6.15114	0.984861	0.334504	0.564226	-5.78325
Bmpr2	-1.44672	4.13692	-2.90498	0.00776172	0.0933671	-2.64982
Fam117b	-1.14757	5.65394	-2.76845	0.0106742	0.109961	-2.93775
Wdr12	0.026302	4.83571	0.0466074	0.963211	0.983118	-6.25932
Carf	-0.466456	2.97523	-1.24146	0.226415	0.458981	-5.51111
Nbeal1	-0.144905	4.90617	-0.481159	0.634755	0.788722	-6.14473
Cyp20a1	-0.258119	3.35765	-0.609503	0.547911	0.727841	-6.07534
Abi2	0.789279	2.8794	2.13108	0.0435107	0.207267	-4.17829
Raph1	-0.182041	3.71788	-0.430546	0.670635	0.810432	-6.1677
Ino80d	-0.843279	6.3137	-1.71773	0.0987049	0.30199	-4.86583
Ino80dos	-0.508717	4.38588	-1.11798	0.274628	0.507531	-5.6491
Gm20342	-0.194542	4.56086	-0.431469	0.669973	0.810127	-6.1673
Ndufs1	-0.362796	5.34688	-0.88786	0.383415	0.604827	-5.87113
Eef1b2	-0.0823653	9.12419	-0.24704	0.806976	0.897085	-6.22981
Fastkd2	-0.174381	2.7751	-0.465641	0.645664	0.79563	-6.15204
Klf7	-1.31514	6.42481	-3.80452	0.000860546	0.0334749	-0.626591
Gm28981	-0.150468	2.52228	-0.334355	0.741012	0.854689	-6.20441
Creb1	-0.940717	5.89783	-2.07874	0.0484836	0.219112	-4.2711
Mettl21a	-0.0722641	2.30707	-0.240647	0.811869	0.899536	-6.23137
2810408I11Rik	-0.882548	4.67495	-1.84016	0.0781267	0.273367	-4.67348
Ccnyl1	-0.996647	3.47441	-2.19457	0.0380955	0.194027	-4.06364
Plekhm3	-1.44285	3.69291	-3.48733	0.00189809	0.0471281	-1.35966
Idh1	-0.0606205	6.15069	-0.262095	0.795482	0.889904	-6.22597
Pikfyve	-1.36485	4.89576	-2.84972	0.00883567	0.100846	-2.76715
Rpe	-0.252173	6.26393	-1.10512	0.280046	0.512621	-5.66272
Kansl1l	-0.236008	4.98167	-0.536617	0.596465	0.760874	-6.1167
Acadl	0.0240318	7.3065	0.143402	0.887169	0.944944	-6.25009
Lancl1	0.229257	3.42004	0.503409	0.619259	0.777737	-6.13384
Ikzf2	0.326715	2.67051	0.789706	0.437421	0.645788	-5.95138
Bard1	-1.21415	4.98158	-2.57634	0.0165551	0.131956	-3.33099
Atic	0.545479	4.74921	1.14023	0.265427	0.497741	-5.62519
Fn1	-0.581377	2.35674	-2.47627	0.0207068	0.147197	-3.52973
Mreg	0.386999	2.89857	0.858859	0.398903	0.616719	-5.89576
Pecr	1.43778	3.4259	2.89928	0.00786652	0.0942392	-2.66197
Xrcc5	-0.536246	3.57131	-1.14586	0.263132	0.495573	-5.61906
Smarcal1	0.0150578	4.06427	0.0371952	0.970637	0.986101	-6.25972
Rpl37a	-0.0778912	9.61178	-0.238393	0.813597	0.900175	-6.23191
Tns1	0.0502879	2.41979	0.173256	0.863901	0.931386	-6.24535
Rufy4	-0.506061	2.39645	-1.67952	0.106005	0.312189	-4.92378
Cxcr2	-1.59517	6.73956	-2.83401	0.00916591	0.102153	-2.80032
Arpc2	-0.415744	9.67973	-2.30814	0.0299071	0.173668	-3.85317
Aamp	-0.615622	5.12445	-1.15015	0.261397	0.493468	-5.61438
Pnkd	-0.788941	4.18516	-1.88071	0.0721827	0.263032	-4.60759
Tmbim1	0.13361	2.54903	0.382743	0.705274	0.831847	-6.18708
Slc11a1	-1.5413	2.56758	-6.88453	4.00985e-07	0.000338624	6.52076
Ctdsp1	-0.640625	5.24756	-1.54327	0.135831	0.35198	-5.122
Usp37	-0.0427888	5.72963	-0.157646	0.876053	0.938423	-6.24794
Cnot9	-0.248877	4.60586	-0.608991	0.548244	0.728029	-6.07565
Zfp142	-0.738343	3.61911	-1.77139	0.0891773	0.288801	-4.78276
Bcs1l	-0.509088	3.02496	-1.27751	0.213624	0.446805	-5.46843
Rnf25	-1.58542	3.92528	-3.47603	0.0019519	0.0476552	-1.38548
Ttll4	-0.344935	2.61666	-0.981791	0.335983	0.565303	-5.78616
Nhej1	-1.53814	3.52186	-3.63733	0.00130776	0.0414329	-1.01497
Cnppd1	-0.632324	5.91106	-2.2843	0.0314795	0.178415	-3.89791
Retreg2	-0.60109	4.82958	-1.33398	0.194715	0.424584	-5.39946
Zfand2b	-0.699756	5.29222	-1.71108	0.0999443	0.303844	-4.87599
Abcb6	-0.46	2.29286	-1.94179	0.0639729	0.24972	-4.50636
Atg9a	-1.10015	3.78931	-2.58571	0.0162091	0.130333	-3.31216
Ankzf1	-0.827205	3.55671	-1.84462	0.0774524	0.272646	-4.66628
Glb1l	-0.45603	3.23696	-1.12003	0.273769	0.506653	-5.64691
Stk16	-0.46054	6.14879	-1.75841	0.0914074	0.291734	-4.80304
Tuba4a	-0.308321	8.8498	-1.09086	0.286151	0.51856	-5.67768
Dnajb2	-0.492592	2.64693	-1.41549	0.169754	0.395438	-5.29542
Dnpep	0.000801704	4.30357	0.0017939	0.998583	0.99923	-6.26041
Gmppa	-0.969699	3.14926	-2.80634	0.00977595	0.104752	-2.8585
Stk11ip	0.00251986	2.39593	0.00796981	0.993707	0.996879	-6.26038
Farsb	-0.107052	4.68822	-0.196756	0.845673	0.919706	-6.24099
Acsl3	-0.822724	3.95819	-1.80751	0.0832166	0.280304	-4.72575
Utp14b	-0.466256	2.74867	-1.27304	0.215181	0.44885	-5.47378
Ap1s3	-0.631053	3.47597	-1.48683	0.150062	0.372566	-5.20012
Wdfy1	-0.711484	4.75526	-1.47855	0.152248	0.374853	-5.21138
Mrpl44	0.224264	6.10005	0.909598	0.372066	0.593974	-5.85217
Serpine2	0.181628	4.74149	0.330757	0.743694	0.856507	-6.20561
Cul3	-1.04379	6.78392	-2.05233	0.0511813	0.224489	-4.31734
Dock10	-1.33927	7.59379	-1.66742	0.10841	0.314536	-4.94192
Rhbdd1	-1.68185	4.54665	-3.38653	0.00243352	0.0523882	-1.58892
Mff	-0.460073	6.37471	-2.0067	0.0561573	0.234571	-4.39625
Agfg1	-1.22362	5.66755	-2.23264	0.0351486	0.187772	-3.99386
Pid1	-0.444969	2.52059	-1.43998	0.162772	0.387965	-5.26314
Trip12	-0.251675	7.02847	-1.07565	0.292764	0.525588	-5.69343
Fbxo36	0.283769	2.75008	0.723993	0.476058	0.675914	-6.00012
C130026I21Rik	-0.851726	2.77303	-2.40784	0.0240799	0.157331	-3.663
A530032D15Rik	-0.981615	2.34073	-3.7361	0.00102169	0.035786	-0.786018
Sp110	-1.52162	5.49221	-2.95138	0.00695701	0.0880551	-2.5505
Sp140	-0.488098	7.41002	-1.58248	0.126611	0.340797	-5.06633
Sp100	-0.571159	7.54058	-2.33901	0.0279777	0.168283	-3.79481
A630001G21Rik	-0.636198	5.14001	-1.53169	0.138657	0.356189	-5.13822
Cab39	-0.70846	7.13917	-2.84958	0.00883847	0.100846	-2.76743
Itm2c	0.11204	4.18428	0.222731	0.825627	0.907604	-6.23553
Psmd1	0.202159	6.47688	0.794336	0.434773	0.644208	-5.94779
Armc9	-0.137346	2.44284	-0.421694	0.676996	0.814416	-6.17146
Ncl	0.112961	8.64453	0.365688	0.717797	0.840321	-6.19345
Ptma	-0.300741	11.7534	-0.738497	0.467363	0.669228	-5.98971
Pde6d	0.173601	6.0903	0.768113	0.449902	0.656916	-5.96784
Cops7b	-0.61189	4.15155	-1.42978	0.16565	0.390876	-5.27664
Dis3l2	-0.855409	4.08077	-1.66035	0.109837	0.315894	-4.95248
Eif4e2	-0.571748	5.72323	-1.26815	0.216892	0.450674	-5.47962
Gigyf2	-0.523963	5.93456	-1.13919	0.265849	0.498114	-5.6263
Inpp5d	-1.06392	6.65203	-2.16396	0.0406259	0.199987	-4.1192
Atg16l1	-0.2603	5.21765	-1.04239	0.307603	0.539704	-5.72717
Sag	-0.814599	2.44132	-3.27508	0.00319653	0.0588238	-1.83986
Dgkd	-0.669249	5.73202	-2.61105	0.0153068	0.127139	-3.26106
Hjurp	-0.592604	6.97768	-2.5973	0.0157904	0.129289	-3.28882
Agap1	-0.969773	6.63138	-3.27182	0.003222	0.0588238	-1.84714
Cops8	-0.396912	5.51711	-1.36513	0.184856	0.413412	-5.36032
Lrrfip1	-0.812845	7.27087	-4.76836	7.45791e-05	0.00843302	1.65688
Ramp1	-0.198222	7.18869	-0.623052	0.539118	0.721766	-6.06709
Ube2f	-0.151964	6.18776	-0.561425	0.579706	0.749638	-6.1032
Scly	-0.128114	4.00498	-0.280323	0.781629	0.881868	-6.22102
Ilkap	-0.46107	5.8265	-1.4778	0.152448	0.375053	-5.2124
Hes6	-0.118819	4.42092	-0.243595	0.809612	0.898757	-6.23065
Per2	-0.589917	3.5338	-1.28681	0.210417	0.443413	-5.45725
Traf3ip1	0.250285	2.41314	0.739009	0.467058	0.668885	-5.98934
Asb1	0.109259	3.06252	0.255044	0.800859	0.893143	-6.2278
Hdac4	-0.59068	6.01718	-2.35459	0.027048	0.166366	-3.76518
Ndufa10	-0.558969	5.54967	-1.28947	0.209506	0.442418	-5.45404
Cops9	-0.460393	7.35018	-1.85886	0.0753345	0.269338	-4.64322
Gpc1	-0.546526	5.66299	-1.24756	0.224211	0.45695	-5.50396
Dusp28	-0.38501	2.49034	-1.36172	0.185914	0.414395	-5.36464
Rnpepl1	-0.698123	3.8006	-1.55584	0.132818	0.348262	-5.10428
9430060I03Rik	-0.540734	2.85443	-1.4645	0.156015	0.379333	-5.23036
Capn10	0.0861276	2.93774	0.229381	0.820513	0.90492	-6.23402
Sned1	0.0889965	2.43568	0.206809	0.837901	0.915801	-6.23896
Mterf4	-0.280352	3.80217	-0.751971	0.45937	0.664594	-5.97986
Pask	-0.899072	3.06303	-2.44722	0.0220814	0.151546	-3.58657
Ppp1r7	-0.912299	5.4563	-1.66481	0.108934	0.315098	-4.94582
Hdlbp	0.199638	6.86986	0.98661	0.333662	0.563562	-5.78158
Sept2	-0.714716	2.45671	-2.83124	0.00922521	0.102231	-2.80614
Stk25	-0.00617389	4.43731	-0.0201549	0.984086	0.992857	-6.26021
Thap4	-0.287116	3.68308	-0.733168	0.470547	0.672162	-5.99356
Atg4b	-0.691717	4.70538	-1.35786	0.18712	0.415159	-5.36952
Dtymk	-0.262228	7.46666	-0.741255	0.46572	0.667444	-5.98771
Ing5	0.0451709	5.39446	0.139377	0.890313	0.946225	-6.25066
D2hgdh	-0.928237	2.69026	-3.30112	0.00299975	0.0581268	-1.78146
Fam174a	-0.378956	4.8919	-0.936017	0.358575	0.582369	-5.82856
St8sia4	0.191778	4.76057	0.373126	0.712325	0.836907	-6.19071
Slco4c1	-1.21418	6.338	-2.64597	0.0141399	0.124564	-3.19018
Panct2	-1.66833	3.37605	-4.57882	0.000120814	0.010775	1.2055
D1Ertd622e	-1.06379	5.64752	-2.43664	0.022603	0.152747	-3.60719
Ppip5k2	-0.11852	5.37433	-0.281025	0.781096	0.881868	-6.22082
Gin1	-1.30571	3.97898	-3.03179	0.00574777	0.0775815	-2.37679
Pam	-0.8646	6.68967	-3.41889	0.00224734	0.0505055	-1.51555
B230216N24Rik	-0.591162	2.77795	-1.75354	0.0922549	0.293083	-4.81061
1810006J02Rik	-1.45345	3.40123	-4.14031	0.000368511	0.0197487	0.163298
Gm28403	-0.79605	2.42326	-3.1323	0.00451745	0.0693561	-2.1569
Pign	-0.021258	5.6307	-0.0458261	0.963827	0.983348	-6.25936
Relch	-0.213189	5.96289	-0.721456	0.477589	0.677021	-6.00192
Gm7160	-0.620048	3.18471	-1.52874	0.139383	0.357108	-5.14233
Zcchc2	-0.10649	5.07055	-0.407356	0.687352	0.821967	-6.17738
Phlpp1	-0.43864	4.05525	-0.906099	0.373878	0.595922	-5.85525
Bcl2	-0.399597	3.51173	-1.00987	0.322619	0.552411	-5.75923
Kdsr	-1.07913	3.64879	-2.48129	0.0204771	0.147197	-3.51986
Vps4b	-0.551362	6.79384	-2.77491	0.0105158	0.109336	-2.92428
Serpinb2	-0.316953	2.84168	-0.666556	0.511404	0.703111	-6.03941
Tsn	-0.0156727	6.92923	-0.0614789	0.951486	0.978244	-6.25852
Nifk	-0.67701	4.71736	-1.38566	0.178575	0.406771	-5.3341
Clasp1	-0.439642	6.48068	-1.73641	0.0952944	0.297507	-4.83714
2900060B14Rik	-0.301142	2.15646	-1.27188	0.215586	0.449179	-5.47517
Ralb	-0.716681	6.4789	-2.36302	0.0265571	0.164277	-3.74911
Tmem185b	-0.591636	3.71404	-1.4333	0.164654	0.389506	-5.272
Ptpn4	-0.513561	3.84486	-1.23268	0.229617	0.462032	-5.52134
Dbi	-0.0700607	8.51757	-0.179796	0.85882	0.928471	-6.24419
3110009E18Rik	-0.263672	2.68695	-0.804594	0.428941	0.639855	-5.93978
Steap3	-0.30708	3.45463	-0.619517	0.541404	0.723061	-6.06926
Insig2	-0.204052	4.20711	-0.435199	0.667301	0.807983	-6.16569
Ccdc93	-0.0643974	4.2693	-0.170207	0.866272	0.932346	-6.24588
Ddx18	0.383649	4.89066	0.867415	0.394292	0.613608	-5.88858
Actr3	-0.540949	9.66954	-3.07225	0.00521812	0.0748989	-2.28863
Slc35f5	-0.295139	2.60203	-0.82951	0.414979	0.628266	-5.9199
Mgat5	0.152661	6.96148	0.492128	0.627094	0.782885	-6.13942
Ccnt2	-0.325622	5.0941	-0.769466	0.449113	0.656264	-5.96682
Rab3gap1	-0.189701	5.31163	-0.450995	0.656036	0.801256	-6.15872
Zranb3	-0.200979	4.12732	-0.443583	0.661311	0.803705	-6.16202
R3hdm1	0.192346	6.47102	0.747886	0.461785	0.665726	-5.98287
Ubxn4	-0.788791	6.47899	-1.65813	0.110287	0.316244	-4.95578
Mcm6	-0.366378	6.15241	-0.706362	0.486755	0.684782	-6.01251
Dars	-0.437249	6.5166	-0.860064	0.398252	0.616719	-5.89475
Cxcr4	-0.467572	6.50901	-2.42149	0.0233694	0.155308	-3.63661
Gm15675	-1.20959	2.52796	-5.81513	5.34768e-06	0.0021328	4.11972
Cd55	-1.39998	4.85004	-2.41624	0.0236403	0.156274	-3.64677
Gm16083	-1.42188	2.57237	-5.79687	5.59531e-06	0.0021328	4.07753
Pfkfb2	-0.909004	2.62596	-3.21568	0.00369304	0.0621159	-1.97238
Yod1	-1.14442	2.9186	-3.82801	0.000811198	0.0324318	-0.571701
Mapkapk2	-0.497933	6.69402	-1.93768	0.0644984	0.250191	-4.51325
Dyrk3	0.216844	2.80086	0.540056	0.594128	0.759239	-6.11486
Eif2d	-0.238783	3.92933	-0.66711	0.511056	0.702824	-6.03905
Rassf5	-1.21675	5.17357	-2.75145	0.011102	0.112225	-2.97313
Ikbke	-0.377888	4.82967	-0.716044	0.480864	0.679056	-6.00575
Srgap2	-0.135037	6.9074	-0.631773	0.533499	0.718679	-6.06168
Gm29488	-0.5718	2.33075	-2.48231	0.0204311	0.147197	-3.51787
Fam72a	-0.444892	2.67482	-1.27953	0.212926	0.446272	-5.46601
Ctse	-0.863674	5.50669	-2.43483	0.0226932	0.152878	-3.6107
Rab7b	-0.0557458	2.91131	-0.115403	0.909084	0.956956	-6.25373
Rab29	-1.06592	4.05719	-2.68113	0.0130497	0.120173	-3.11832
Nucks1	-0.858943	7.45017	-1.36853	0.183802	0.41197	-5.35599
Elk4	-0.672765	4.58617	-1.40224	0.173628	0.400462	-5.31269
Nuak2	-1.21137	3.71965	-3.02787	0.00580169	0.0780306	-2.3853
Tmcc2	-0.492596	2.39493	-1.81098	0.0826622	0.279694	-4.72023
Dstyk	-0.627429	5.26735	-1.45369	0.158966	0.383526	-5.24487
6030442K20Rik	-0.210614	2.39733	-0.720079	0.478421	0.677455	-6.0029
Rbbp5	-0.753399	4.48405	-1.6413	0.113758	0.322576	-4.98073
Tmem81	-0.326978	2.28343	-1.23614	0.228352	0.460562	-5.51731
Mdm4	-0.383964	6.54783	-1.85216	0.0763247	0.271242	-4.65408
Pik3c2b	-0.00952162	3.70442	-0.0252793	0.980041	0.990959	-6.26009
Ppp1r15b	-1.1121	5.73487	-2.64363	0.0142154	0.124647	-3.19494
Sox13	-0.658314	2.66885	-2.08119	0.0482405	0.218536	-4.2668
Snrpe	-0.0323442	8.33551	-0.117301	0.907596	0.956124	-6.25351
Lax1	0.652906	2.45925	1.95753	0.0619938	0.245129	-4.47989
Atp2b4	0.0455434	4.53621	0.0817224	0.935544	0.970312	-6.25706
Btg2	-0.588101	6.93102	-1.47137	0.154164	0.376718	-5.22111
Chit1	0.287192	3.56754	0.567952	0.575336	0.746491	-6.09954
Chil1	-1.1662	7.28	-2.8466	0.00890035	0.100846	-2.77374
Tmem183a	-0.669933	4.81306	-1.5553	0.132944	0.348262	-5.10503
Cyb5r1	-0.363107	4.50981	-0.896543	0.378855	0.600341	-5.86361
Adipor1	-0.73212	7.58501	-3.18224	0.00400461	0.0646577	-2.04661
Klhl12	-0.425331	4.33855	-0.993239	0.330488	0.560772	-5.77526
Rabif	-0.540483	4.64475	-1.39648	0.175334	0.402382	-5.32015
Kdm5b	-0.103425	5.97844	-0.393787	0.69721	0.827958	-6.1828
Ppp1r12b	-0.411761	4.63333	-1.05849	0.300355	0.532665	-5.71095
Ube2t	-0.699172	4.65697	-1.49519	0.14788	0.369243	-5.1887
Ptpn7	-0.50094	5.97128	-1.10139	0.281633	0.514404	-5.66665
Arl8a	-0.290717	5.7207	-0.974247	0.339638	0.568225	-5.79327
Rnpep	-0.536511	6.84313	-1.04026	0.30857	0.540317	-5.72929
Timm17a	-0.310744	5.18943	-0.7488	0.461243	0.665572	-5.98219
Ipo9	0.084653	4.58785	0.210293	0.835212	0.913592	-6.23823
Nav1	0.885217	2.84303	2.14733	0.0420628	0.204032	-4.14917
Csrp1	-0.167353	5.53916	-0.699866	0.49073	0.68824	-6.01701
Tmem9	-0.24927	3.08299	-0.51425	0.611773	0.772286	-6.12836
Kif21b	-1.10866	5.16602	-2.64065	0.0143122	0.124907	-3.20101
Camsap2	-0.626499	2.92502	-1.68369	0.105187	0.311012	-4.91751
Ddx59	-0.358734	2.35243	-1.33224	0.195277	0.425387	-5.40162
Kif14	-0.735494	4.97824	-1.41276	0.170547	0.396552	-5.29899
Zfp281	0.615968	4.74554	2.2501	0.0338674	0.18434	-3.96159
Gm19705	-1.41359	3.63366	-3.30918	0.00294131	0.0579627	-1.76337
Gm4258	0.583871	4.25451	1.01192	0.321656	0.551553	-5.75723
Ptprc	-0.962724	9.01316	-3.03958	0.00564191	0.0772192	-2.35985
Nek7	-0.23885	5.54388	-1.02396	0.316048	0.547265	-5.74544
2310009B15Rik	-0.4727	4.10284	-1.01741	0.319092	0.549547	-5.75188
Dennd1b	-0.436086	6.49727	-1.66301	0.109299	0.315447	-4.94852
Zbtb41	-1.16124	3.37378	-2.81008	0.00969127	0.1046	-2.85065
Aspm	-0.820455	5.63062	-1.97266	0.0601434	0.241438	-4.45431
Cdc73	-0.57865	5.53184	-1.36779	0.18403	0.41239	-5.35693
Glrx2	-0.55729	5.59082	-1.2376	0.22782	0.460347	-5.51562
Uchl5	-0.977803	6.55435	-1.43395	0.164471	0.389343	-5.27114
Gm29170	-0.484996	2.67995	-1.76956	0.0894886	0.289017	-4.78563
Rgs2	-0.461877	7.04094	-2.29353	0.0308619	0.176969	-3.88062
Rgs18	-0.633253	6.54924	-2.66295	0.0136032	0.121844	-3.15554
Pla2g4a	-0.099006	6.67948	-0.461325	0.648713	0.797144	-6.15403
Ptgs2	0.201925	3.11369	0.378891	0.708095	0.833905	-6.18855
Odr4	-1.21534	4.26387	-2.55341	0.0174317	0.135408	-3.37693
Tpr	-0.301451	8.46726	-1.44591	0.161118	0.386192	-5.25526
Gm10138	-0.610888	2.51034	-1.96032	0.0616491	0.244305	-4.47519
Ivns1abp	-0.111108	5.22919	-0.258775	0.798012	0.891152	-6.22684
Swt1	0.016049	5.2006	0.0359072	0.971653	0.986736	-6.25977
Trmt1l	-0.345633	4.94946	-0.88087	0.387112	0.608534	-5.87714
Rnf2	0.0672675	4.74015	0.196242	0.846071	0.920039	-6.24109
Fam129a	-1.47664	6.35585	-3.91169	0.000657086	0.0291258	-0.375711
Edem3	-0.261686	4.22986	-0.577074	0.569256	0.742332	-6.09437
1700025G04Rik	0.237706	4.42301	0.355769	0.725117	0.845079	-6.19703
Tsen15	-0.133742	3.55602	-0.278393	0.783092	0.882511	-6.22156
Arpc5	-0.56997	9.61137	-2.77147	0.0105999	0.109471	-2.93146
Ncf2	-0.987697	7.87707	-3.73666	0.00102024	0.035786	-0.784698
Smg7	-0.744004	5.35959	-1.7664	0.0900283	0.28988	-4.79057
Dhx9	-0.555399	6.58907	-1.02284	0.31657	0.547732	-5.74655
Npl	0.216853	2.36837	0.598518	0.555093	0.733067	-6.0819
Rnasel	-0.322636	5.06869	-0.829486	0.414992	0.628266	-5.91992
Glul	-0.394224	4.08997	-0.967711	0.342826	0.570622	-5.7994
Ier5	-1.39583	5.11088	-3.52067	0.00174775	0.0458174	-1.2834
Stx6	-0.17395	4.67441	-0.425956	0.67393	0.812427	-6.16966
Xpr1	-0.11938	6.30591	-0.538422	0.595238	0.759982	-6.11574
Acbd6	-1.20518	5.47319	-2.28719	0.0312848	0.178177	-3.8925
Qsox1	-1.22376	5.50133	-2.76367	0.010793	0.110284	-2.94772
Cep350	-0.322531	7.23717	-1.77987	0.0877459	0.287185	-4.76946
Tor1aip1	-0.71368	6.49457	-3.04171	0.00561328	0.0772192	-2.35521
Tor1aip2	-0.0940792	6.11208	-0.430224	0.670866	0.810432	-6.16783
Gm2000	-0.0776474	3.93598	-0.16407	0.871048	0.935188	-6.2469
Soat1	-0.499269	6.3222	-2.15537	0.0413617	0.201801	-4.13468
Abl2	-0.577962	4.02396	-1.14617	0.26301	0.49548	-5.61873
Tor3a	-0.51509	3.38154	-1.13037	0.269476	0.502308	-5.63584
Fam20b	-0.242264	4.85463	-0.578566	0.568265	0.741711	-6.09352
Ralgps2	0.028676	3.70947	0.0594984	0.953047	0.978681	-6.25864
Rasal2	-1.0657	3.11099	-2.88957	0.00804793	0.095504	-2.68263
Cryzl2	0.0164337	2.91776	0.0455098	0.964077	0.983403	-6.25937
Cop1	-0.487509	6.85657	-2.12543	0.0440243	0.208299	-4.18838
4930523C07Rik	-0.600483	6.71189	-2.38416	0.0253609	0.160227	-3.70862
Mrps14	-0.27342	7.05092	-1.16379	0.255934	0.488102	-5.5994
Cacybp	-0.484925	6.60141	-0.908934	0.37241	0.594334	-5.85276
Rabgap1l	-0.968885	6.00025	-2.12554	0.0440148	0.208299	-4.18819
Rc3h1	-0.075171	5.9155	-0.305269	0.762789	0.869848	-6.21371
Zbtb37	-0.436051	3.19863	-1.16288	0.256295	0.488307	-5.60041
Gas5	-0.141655	6.9161	-0.404427	0.689475	0.823447	-6.17857
Dars2	-0.465705	3.48166	-1.05008	0.304126	0.53577	-5.71945
Cenpl	-0.930277	4.4536	-1.98255	0.0589603	0.239913	-4.43751
Klhl20	-0.411091	3.9483	-0.936554	0.358304	0.582338	-5.82807
Prdx6	-0.410299	8.27795	-1.29648	0.207122	0.439671	-5.44555
Suco	-0.744289	6.41274	-1.52908	0.139301	0.357023	-5.14187
Pigc	-0.684436	3.16714	-1.76389	0.0904595	0.290755	-4.79449
Vamp4	0.350989	5.66323	1.36076	0.186216	0.414395	-5.36586
Prrc2c	-0.171945	7.86685	-0.792928	0.435577	0.64479	-5.94888
Gorab	-0.448863	2.65608	-1.39589	0.175511	0.402429	-5.32092
Kifap3	0.178104	2.41545	0.568587	0.574911	0.746229	-6.09919
Scyl3	-0.10746	4.40541	-0.269315	0.789986	0.886889	-6.22405
BC055324	-0.342665	3.74755	-0.880199	0.387468	0.608658	-5.87771
Mettl18	0.237029	2.58197	0.742367	0.465059	0.667159	-5.9869
Sell	-0.683172	7.22253	-2.73309	0.0115822	0.114068	-3.01122
Selp	-0.552472	3.00214	-1.60141	0.12235	0.335254	-5.03906
Gm16548	-0.423419	2.57232	-1.56631	0.130348	0.345409	-5.08942
F5	-0.598169	6.74747	-2.21983	0.0361158	0.189514	-4.01741
Slc19a2	0.547296	2.36735	1.70649	0.100807	0.30481	-4.88298
Ccdc181	-0.633971	2.94264	-1.77237	0.0890109	0.288707	-4.78123
Blzf1	-0.358781	4.04699	-0.858928	0.398866	0.616719	-5.8957
Nme7	0.115501	3.66781	0.267006	0.791742	0.887396	-6.22467
Atp1b1	0.143737	4.02535	0.256356	0.799858	0.892422	-6.22746
Sft2d2	-0.724807	4.76666	-1.46446	0.156026	0.379333	-5.23042
Tiprl	0.218075	5.94353	0.978571	0.33754	0.566785	-5.7892
Dcaf6	-0.772503	5.09005	-1.88631	0.0713929	0.261843	-4.5984
Mpc2	-0.744242	7.6641	-3.85149	0.000764687	0.0315086	-0.516801
Mpzl1	-1.37336	3.42967	-3.54818	0.0016325	0.0446804	-1.22032
Rcsd1	-0.62812	7.40341	-3.10173	0.00486204	0.0718184	-2.2241
Creg1	0.403132	7.5384	2.23068	0.0352948	0.187854	-3.99746
Pou2f1	-0.107545	5.32433	-0.445301	0.660087	0.803089	-6.16126
Tada1	-0.570623	4.3505	-1.29247	0.208482	0.44148	-5.45041
Uck2	0.340989	5.63234	0.624126	0.538424	0.721552	-6.06643
Tmco1	-0.551359	6.24233	-1.18157	0.248935	0.480556	-5.57963
Aldh9a1	-0.350578	5.00602	-0.643321	0.526107	0.7133	-6.05442
Mgst3	-0.905623	5.35636	-2.14791	0.0420115	0.204032	-4.14811
Pbx1	-1.01607	8.1824	-3.36641	0.00255674	0.0546205	-1.63442
Nuf2	-0.934025	5.58833	-2.29702	0.0306317	0.176351	-3.87408
Hsd17b7	-0.748399	3.5128	-1.6591	0.11009	0.316215	-4.95434
Uap1	-0.736528	4.43041	-1.59433	0.123929	0.337273	-5.04929
Uhmk1	-0.504545	4.67401	-1.2388	0.227383	0.460017	-5.51422
Gm7694	-0.72104	3.1678	-1.93609	0.064702	0.250624	-4.5159
Nos1ap	-0.469725	6.96343	-1.6674	0.108414	0.314536	-4.94196
Olfml2b	0.132703	5.87002	0.366405	0.717268	0.840288	-6.19319
Atf6	-0.637172	5.59331	-1.46134	0.156874	0.380753	-5.23462
Dusp12	-0.31154	2.73083	-0.838966	0.409755	0.624611	-5.91221
Fcgr2b	-0.697685	6.116	-1.50902	0.144327	0.364145	-5.16968
Fcgr4	-0.717339	5.47947	-1.54232	0.136062	0.352296	-5.12334
Fcgr3	-1.24829	7.16177	-2.30962	0.0298123	0.173668	-3.8504
Sdhc	-0.113939	6.07453	-0.427594	0.672753	0.811475	-6.16896
Tomm40l	-0.142979	2.89751	-0.356365	0.724677	0.844896	-6.19681
Fcer1g	-0.518277	10.4028	-1.84644	0.0771789	0.272547	-4.66334
Ndufs2	-0.277818	5.77825	-0.601249	0.553303	0.732046	-6.08028
B4galt3	-0.0750889	5.5073	-0.267084	0.791683	0.887396	-6.22465
Ppox	-0.329293	4.15452	-0.811723	0.424917	0.636491	-5.93415
Usp21	0.776621	4.02466	2.40955	0.0239902	0.156949	-3.65971
Ufc1	-0.645867	6.07572	-1.38146	0.179847	0.408191	-5.33949
Gm20045	-0.587843	2.31368	-2.4448	0.0221999	0.151706	-3.5913
Dedd	0.312543	4.2046	0.830141	0.414629	0.628266	-5.91939
Nit1	0.146519	4.1892	0.454306	0.653685	0.800447	-6.15723
Pfdn2	-0.541955	6.23463	-1.11124	0.277459	0.510388	-5.65626
Arhgap30	-0.806751	6.53857	-3.07501	0.0051837	0.0748989	-2.28259
Usf1	-1.10295	3.71427	-2.34155	0.0278241	0.16756	-3.78999
B930036N10Rik	-0.192684	3.62731	-0.425898	0.673972	0.812427	-6.16968
Alyref2	-0.294536	3.19487	-0.698417	0.491619	0.688691	-6.018
Cd244a	-1.29713	3.31501	-3.05354	0.00545686	0.0764069	-2.32944
Ly9	0.0813944	2.55209	0.22682	0.822482	0.906422	-6.23461
Cd48	-0.363444	4.42265	-0.681793	0.501887	0.696106	-6.02929
Cd84	-1.64005	5.80354	-4.18306	0.000330623	0.0186091	0.264551
Ncstn	-0.519424	4.76968	-1.33062	0.1958	0.425607	-5.40363
Copa	-1.0071	5.96904	-2.16715	0.0403552	0.199813	-4.11344
Pex19	-0.396624	4.18325	-0.827808	0.415924	0.629012	-5.92128
Dcaf8	-0.914783	5.22374	-1.71276	0.0996302	0.30353	-4.87343
Igsf8	0.366409	4.50115	0.814358	0.423436	0.63569	-5.93206
Pigm	-0.041977	3.7949	-0.0946305	0.925393	0.96451	-6.25592
Tagln2	-0.965847	8.66117	-1.3765	0.181356	0.4101	-5.34584
4933439K11Rik	0.0605919	2.96992	0.149445	0.882449	0.942408	-6.2492
Dusp23	-0.77964	2.58436	-2.61082	0.0153145	0.127139	-3.26151
Ackr1	-0.315611	2.66017	-0.791855	0.436191	0.645088	-5.94972
Aim2	0.0451062	4.87141	0.106185	0.916317	0.959845	-6.25475
Ifi207	-0.132745	2.47309	-0.333131	0.741924	0.85525	-6.20482
Ifi204	-0.461884	3.37247	-0.949065	0.352034	0.577739	-5.81666
Mndal	-0.101047	2.70922	-0.240987	0.811609	0.899455	-6.23129
Ifi203	0.186032	2.63037	0.432389	0.669314	0.809524	-6.1669
Spta1	-1.22578	3.44407	-2.84621	0.00890851	0.100846	-2.77457
Fh1	-0.867275	3.96177	-1.76974	0.0894587	0.289017	-4.78535
Chml	-0.953258	2.71955	-3.26823	0.0032503	0.0588238	-1.85518
Exo1	-0.598665	4.43697	-1.28277	0.211805	0.445218	-5.46211
Cep170	-0.299687	5.47254	-0.70384	0.488296	0.686162	-6.01426
Sdccag8	-0.802141	5.56863	-1.89929	0.0695925	0.25882	-4.57704
Akt3	-0.321051	4.75945	-0.61835	0.542161	0.723578	-6.06997
Zbtb18	-1.01467	3.54882	-2.25312	0.03365	0.183769	-3.95599
Adss	-0.200267	6.54043	-0.918621	0.367421	0.589814	-5.84418
Desi2	-0.56253	4.45922	-1.1786	0.250095	0.481436	-5.58296
Cox20	-0.669761	5.12149	-1.63442	0.115203	0.324279	-4.99088
Hnrnpu	-0.227067	8.50276	-0.807832	0.427111	0.638973	-5.93723
Efcab2	-0.770027	3.19045	-1.97486	0.0598788	0.241146	-4.45058
Smyd3	-0.0376074	5.65402	-0.0765641	0.939604	0.97262	-6.25747
Tfb2m	-0.336088	3.99627	-0.756913	0.456458	0.662272	-5.97621
Cnst	-1.07623	4.31094	-2.16429	0.0405974	0.199987	-4.1186
Ahctf1	-0.259248	5.1152	-0.544599	0.591047	0.757223	-6.11242
Cdc42bpa	-0.128179	2.75185	-0.39001	0.699964	0.829256	-6.18428
Psen2	-0.223827	4.9609	-0.849321	0.404083	0.621208	-5.90369
Itpkb	-0.881788	5.43403	-2.16358	0.040658	0.199987	-4.11989
Parp1	0.241859	5.30721	0.511167	0.613898	0.773902	-6.12993
Lin9	-1.28023	4.92577	-2.70013	0.0124938	0.117401	-3.07927
Acbd3	-0.226435	6.29023	-1.03921	0.309049	0.540563	-5.73034
H3f3a	-0.434337	10.921	-2.47222	0.0208934	0.14772	-3.53767
Sde2	-0.0662754	4.98221	-0.236974	0.814685	0.900922	-6.23225
Pycr2	-0.536588	4.92238	-1.03265	0.312046	0.543921	-5.73686
Tmem63a	-0.75766	5.4284	-2.67299	0.0132947	0.120889	-3.13499
Nvl	-0.151145	4.98872	-0.34451	0.733459	0.849672	-6.20096
Cnih4	-0.478785	6.72182	-2.01538	0.0551786	0.232594	-4.38133
Wdr26	-0.311169	7.06287	-1.64258	0.11349	0.321997	-4.97884
Lbr	-0.506886	8.02489	-1.9689	0.0605987	0.242028	-4.46068
Srp9	-0.157836	7.61345	-0.576142	0.569876	0.742948	-6.09491
Degs1	-1.16357	6.25491	-2.43586	0.0226416	0.152789	-3.60869
1700047M11Rik	-1.792	4.51897	-3.67715	0.00118405	0.0391123	-0.92285
Fbxo28	-1.55089	4.21265	-3.42165	0.00223212	0.0504806	-1.50928
Trp53bp2	-1.42003	3.0018	-4.1115	0.000396435	0.0209114	0.0951518
Disp1	-0.15591	2.98639	-0.437453	0.665689	0.807445	-6.16471
Brox	-0.0170793	4.87268	-0.0555212	0.956182	0.979737	-6.25887
Aida	-1.11345	4.28702	-2.27171	0.0323403	0.180508	-3.92143
Mia3	-0.172001	6.38486	-0.926115	0.363593	0.587333	-5.83748
Taf1a	0.520891	2.88562	1.38345	0.179243	0.407552	-5.33694
Dusp10	-0.245532	2.21864	-0.935658	0.358756	0.582509	-5.82888
Hlx	-0.917451	4.93576	-2.0103	0.0557493	0.233988	-4.39007
Gm34342	-0.113658	2.26153	-0.406759	0.687784	0.822255	-6.17762
Marc2	0.213842	5.87733	0.420801	0.677639	0.814801	-6.17183
Rab3gap2	-0.690754	5.17989	-1.70945	0.10025	0.30421	-4.87848
Iars2	0.876406	4.74157	2.91916	0.00750678	0.0918941	-2.61953
Eprs	-0.142932	6.20596	-0.27001	0.789458	0.886512	-6.22386
Rrp15	0.107449	4.22112	0.201435	0.842053	0.917949	-6.24006
A430105J06Rik	-0.383836	3.2934	-0.866211	0.39494	0.614235	-5.88959
Gpatch2	-0.852042	3.88245	-1.9048	0.0688402	0.25772	-4.56794
Kctd3	-0.528681	3.24586	-1.28578	0.210769	0.443779	-5.45848
Cenpf	-0.549389	7.19784	-2.0272	0.0538706	0.230115	-4.36094
Smyd2	-0.282509	2.74809	-0.639996	0.528229	0.714926	-6.05652
Rps6kc1	-2.15834	3.75152	-5.27338	2.07381e-05	0.00401801	2.85436
Angel2	-1.39008	4.96499	-3.07709	0.00515791	0.0748788	-2.27804
Flvcr1	-1.34295	3.56729	-3.27077	0.00323021	0.0588238	-1.84948
Nsl1	-1.05407	3.19918	-2.68706	0.0128738	0.119323	-3.10615
Nenf	-0.761764	3.05361	-1.86885	0.0738783	0.26621	-4.62696
Pacc1	0.241942	2.47718	0.628971	0.535301	0.719759	-6.06343
Ppp2r5a	-1.01206	8.15209	-4.03678	0.000479036	0.0233154	-0.0813357
Dtl	-0.757186	5.73335	-1.27165	0.215666	0.44921	-5.47544
Ints7	-0.583744	4.86719	-1.1517	0.260774	0.493102	-5.61269
Lpgat1	-0.326925	7.44154	-1.42524	0.166946	0.392674	-5.28263
Nek2	-0.278931	3.53436	-0.594685	0.557611	0.735264	-6.08416
Slc30a1	-0.390365	2.77076	-0.949181	0.351976	0.577738	-5.81655
Traf5	-0.757717	2.73417	-2.476	0.020719	0.147197	-3.53025
Rcor3	0.0644249	4.57817	0.155738	0.87754	0.939456	-6.24824
Utp25	0.317059	3.3807	0.659957	0.515557	0.706026	-6.04372
Traf3ip3	-0.473642	5.9095	-1.68235	0.105449	0.311315	-4.91952
Lamb3	-0.615634	3.44668	-1.42656	0.166569	0.392099	-5.28089
Hsd11b1	-1.43875	7.10672	-7.43301	1.12004e-07	0.000215175	7.69044
G0s2	-0.385219	7.32045	-1.16144	0.256866	0.489103	-5.60199
A330023F24Rik	-1.73221	2.59014	-7.4746	1.01842e-07	0.000215175	7.77727
Cd46	-1.11368	2.86569	-3.05419	0.00544838	0.0764069	-2.32802
Cr1l	-1.30372	5.86452	-3.12659	0.00458001	0.0695176	-2.16948
Nmt2	-0.215983	3.82001	-0.484099	0.632697	0.78741	-6.14332
Dclre1c	-0.943464	4.7381	-2.0583	0.0505606	0.223322	-4.30693
Suv39h2	-0.0157615	3.71954	-0.0374302	0.970451	0.986101	-6.25971
Hspa14	-0.362274	6.16432	-0.761315	0.453874	0.66033	-5.97293
Gm45902	-0.238935	2.43044	-0.787192	0.438864	0.646804	-5.95332
Cdnf	-0.431236	2.3096	-1.55665	0.132624	0.348262	-5.10313
Fam107b	-0.310555	8.42269	-1.67475	0.106949	0.313342	-4.93096
Frmd4a	0.549877	3.96601	1.03913	0.309084	0.540563	-5.73042
Prpf18	-0.878434	4.98479	-2.15897	0.0410518	0.200935	-4.1282
Sephs1	-0.733179	4.32562	-1.62411	0.117397	0.328185	-5.00601
Phyh	0.203687	5.7194	0.88709	0.383821	0.604975	-5.8718
Mcm10	-0.661662	4.81603	-1.32424	0.19788	0.428003	-5.41154
Optn	-0.321454	5.66132	-1.26001	0.219761	0.453761	-5.48927
Camk1d	-0.989338	6.86287	-1.8357	0.0788059	0.273994	-4.68066
Cdc123	-0.543513	6.46779	-2.07631	0.0487272	0.219388	-4.27538
Nudt5	-0.555671	5.40446	-0.951445	0.350849	0.577205	-5.81447
Sec61a2	0.117507	2.58973	0.363221	0.719615	0.841569	-6.19435
Upf2	0.180365	6.21791	0.745239	0.463353	0.666326	-5.9848
Usp6nl	-0.149593	3.60411	-0.295414	0.770215	0.875047	-6.21667
Celf2	-0.257901	8.49368	-1.61856	0.11859	0.330329	-5.01411
Taf3	0.108598	5.6614	0.430041	0.670997	0.81049	-6.16791
Atp5c1	-0.26792	7.82369	-1.278	0.213454	0.446805	-5.46784
Kin	-0.472334	5.52928	-1.8398	0.0781815	0.273367	-4.67406
Itih5	0.0500008	5.51526	0.103594	0.918351	0.960788	-6.25503
Pfkfb3	-0.884467	6.46793	-1.84446	0.0774773	0.272646	-4.66654
Gm10851	-0.793866	2.63507	-2.48322	0.0203898	0.147194	-3.51608
Rbm17	-0.121495	6.205	-0.626599	0.536829	0.720467	-6.0649
Il15ra	-0.446086	3.43175	-0.94264	0.355244	0.579633	-5.82254
Fbh1	-0.460689	4.6955	-1.09807	0.283052	0.5155	-5.67014
Ankrd16	-0.956365	3.33141	-2.38806	0.0251457	0.159335	-3.70112
Mindy3	-0.384644	5.73524	-1.43015	0.165545	0.390785	-5.27615
Pter	0.715603	2.60344	2.02722	0.0538689	0.230115	-4.36092
Rsu1	-0.480255	7.37876	-2.49233	0.0199808	0.145768	-3.49812
Trdmt1	0.465056	4.0245	1.19086	0.245338	0.477404	-5.5692
Vim	-0.705033	9.37002	-3.94094	0.000610333	0.0279505	-0.307001
Hacd1	-0.440254	4.30284	-0.904188	0.37487	0.596737	-5.85693
Stam	-0.482279	4.29688	-1.0755	0.292831	0.525614	-5.69358
Cacnb2	-0.635514	4.76649	-1.15677	0.258734	0.490729	-5.60713
Nsun6	-1.11567	3.62485	-2.54078	0.0179323	0.137505	-3.40211
Arl5b	-0.183864	3.88072	-0.470997	0.64189	0.793199	-6.14954
Mllt10	-0.207675	7.2244	-1.05637	0.301303	0.532967	-5.7131
Dnajc1	-1.04139	6.14635	-2.24457	0.0342684	0.185123	-3.97182
Commd3	-0.784071	6.06981	-1.64556	0.112871	0.320964	-4.97444
Bmi1	-0.698714	3.10477	-1.88024	0.0722491	0.263032	-4.60836
Pip4k2a	-0.907449	6.82214	-3.7356	0.00102296	0.035786	-0.787174
Armc3	-0.459229	3.97936	-0.915774	0.368883	0.590482	-5.84671
Msrb2	-1.26463	4.2458	-2.60769	0.0154236	0.127494	-3.26784
Arhgap21	-0.147843	5.1076	-0.500932	0.620975	0.778905	-6.13508
Apbb1ip	-0.551154	8.46782	-3.33584	0.00275563	0.0559738	-1.70339
Pdss1	0.0999633	4.68821	0.241771	0.811009	0.899385	-6.2311
Abi1	-0.430267	6.98209	-2.26546	0.0327752	0.181235	-3.93306
Acbd5	-0.216999	5.34085	-0.668079	0.510448	0.702372	-6.03841
Mastl	-0.910737	4.33975	-1.78203	0.0873847	0.286496	-4.76606
Yme1l1	-0.214262	6.03463	-1.11793	0.274646	0.507531	-5.64915
Spopl	-0.26269	4.57393	-0.631995	0.533356	0.718583	-6.06155
Hnmt	-1.30915	4.09655	-2.77229	0.0105798	0.109471	-2.92974
Il1f9	-2.39622	4.77963	-4.26789	0.000266533	0.0167618	0.46576
Il1rn	-1.61584	3.86823	-3.23762	0.00350153	0.0604055	-1.92353
Psd4	-0.0117048	5.35357	-0.0495561	0.960886	0.981657	-6.25918
Pax8	-0.312909	2.41646	-1.06524	0.297352	0.529859	-5.70409
Ehmt1	-0.312421	5.91309	-0.684131	0.500436	0.695222	-6.02772
Arrdc1	-0.319422	4.78972	-1.1116	0.277306	0.510294	-5.65588
Zmynd19	-0.335599	4.27849	-0.715896	0.480954	0.679056	-6.00585
Dph7	-0.695513	2.8416	-2.06576	0.0497933	0.22187	-4.29387
Mrpl41	-0.98344	5.41108	-1.70925	0.100287	0.30421	-4.87878
Pnpla7	-0.958848	5.10421	-2.39058	0.0250075	0.158913	-3.69628
Tor4a	-1.42397	2.93711	-4.57206	0.000122911	0.010775	1.18939
Nelfb	-0.483263	4.85131	-1.19711	0.242939	0.475151	-5.56214
Tubb4b	-0.324619	8.14124	-1.02151	0.317187	0.548272	-5.74786
Ndor1	-0.312691	2.72981	-0.949545	0.351794	0.577628	-5.81622
Tmem203	-0.0855313	3.80416	-0.199127	0.843839	0.919199	-6.24052
Tprn	-0.267689	3.00201	-0.800731	0.431132	0.641671	-5.94281
Ssna1	-0.514014	6.9461	-2.31102	0.0297223	0.173668	-3.84775
Anapc2	-0.814105	4.1941	-1.64575	0.112832	0.320964	-4.97416
Man1b1	-0.519418	4.05534	-1.12201	0.272944	0.505556	-5.6448
Dpp7	-0.184983	2.29286	-0.725099	0.475392	0.675349	-5.99934
Uap1l1	-0.301943	4.56292	-0.611755	0.546444	0.726884	-6.07398
Sapcd2	-0.47943	2.70281	-1.41504	0.169883	0.3955	-5.29601
Fut7	-0.800881	2.33618	-3.0455	0.00556276	0.0767738	-2.34697
Abca2	-0.0549564	2.7484	-0.149781	0.882187	0.942389	-6.24915
Paxx	-0.27953	4.55837	-0.994832	0.329729	0.5603	-5.77373
Fbxw5	-0.633242	3.14012	-1.6747	0.106958	0.313342	-4.93103
Traf2	-0.0301073	3.78628	-0.0658164	0.948068	0.976407	-6.25824
Edf1	-0.177239	7.28793	-0.702337	0.489216	0.686948	-6.0153
Phpt1	-0.458452	3.01339	-1.17945	0.249761	0.481274	-5.582
Rabl6	-0.277984	4.56502	-0.54534	0.590545	0.756869	-6.11202
Tmem141	0.808053	3.16721	1.91016	0.0681159	0.256165	-4.55907
Camsap1	0.0929761	3.16687	0.236537	0.815021	0.901041	-6.23235
Ubac1	-0.572319	5.05932	-1.23818	0.227607	0.460192	-5.51493
Tmem250-ps	-0.615384	2.99942	-1.56293	0.131142	0.346342	-5.09423
Qsox2	-0.523881	2.30095	-2.16247	0.0407524	0.200185	-4.12189
Dnlz	-1.22934	3.26842	-3.57442	0.0015295	0.0442807	-1.16002
Card9	-0.462492	5.47735	-1.05452	0.302132	0.533492	-5.71498
Snapc4	-0.412002	2.38095	-1.48918	0.149446	0.371404	-5.19692
Entr1	-0.76204	5.26531	-1.87113	0.0735495	0.265405	-4.62324
Pmpca	0.0799243	4.65493	0.185051	0.854741	0.925472	-6.24323
Inpp5e	-0.162895	2.61068	-0.523551	0.605385	0.767009	-6.12357
Sec16a	-0.381788	4.55213	-0.976549	0.33852	0.567532	-5.79111
0610009E02Rik	-0.243929	2.73612	-0.530331	0.600748	0.763891	-6.12003
Notch1	-0.364248	5.71609	-1.42273	0.167664	0.393574	-5.28592
Egfl7	0.63459	3.57163	1.50774	0.144654	0.364578	-5.17145
Agpat2	-0.556045	7.75255	-2.63474	0.0145056	0.125662	-3.21302
Dipk1b	-0.141278	2.96519	-0.386957	0.702193	0.829691	-6.18546
Surf6	-0.380736	3.40139	-0.896821	0.37871	0.600205	-5.86337
Med22	-0.278371	3.51269	-0.636041	0.53076	0.716619	-6.05901
Rpl7a	0.0302742	9.69502	0.114764	0.909586	0.957004	-6.2538
Surf1	-0.289221	4.56499	-0.584681	0.564211	0.738877	-6.09
Surf2	0.0760062	3.46575	0.171581	0.865203	0.931893	-6.24564
Surf4	-0.343319	6.60359	-0.668777	0.51001	0.702153	-6.03795
Rexo4	-0.191349	4.4114	-0.494133	0.625698	0.781929	-6.13844
Cacfd1	0.0362107	2.89598	0.0943125	0.925643	0.96451	-6.25595
Slc2a6	-0.321113	2.66639	-0.705978	0.486989	0.684783	-6.01278
Brd3	-0.62756	6.56536	-2.83085	0.00923377	0.102231	-2.80698
Wdr5	-0.632462	5.13442	-1.18484	0.247666	0.479299	-5.57597
Fcnb	-0.914663	10.0341	-2.32924	0.0285758	0.170154	-3.81334
F730016J06Rik	-1.29007	5.78737	-2.91069	0.00765811	0.0926122	-2.63763
Mrps2	-0.0228981	2.76762	-0.0619295	0.951131	0.978193	-6.25849
Gtf3c5	-0.239931	3.00488	-0.673534	0.507034	0.700159	-6.0348
Gfi1b	-0.225691	3.60568	-0.487134	0.630577	0.785784	-6.14185
Tsc1	0.0429106	3.80556	0.0880084	0.930599	0.967673	-6.25653
Spaca9	0.636226	2.68428	1.61776	0.118766	0.330543	-5.01529
Gtf3c4	-0.619256	3.29054	-1.47467	0.153281	0.375848	-5.21664
Ddx31	-0.0506006	3.24126	-0.122768	0.903312	0.95408	-6.25285
Ttf1	-0.60553	4.94665	-1.43552	0.164025	0.388932	-5.26905
Setx	0.0903531	6.25098	0.37543	0.710634	0.835926	-6.18985
Ntng2	-2.06533	5.15966	-5.77698	5.87842e-06	0.0021328	4.03152
6530402F18Rik	-1.6949	3.66369	-4.19098	0.000324042	0.0186091	0.283319
Med27	-0.151487	4.74811	-0.387349	0.701907	0.829691	-6.18531
Rapgef1	-0.0248283	4.6366	-0.0602199	0.952478	0.978681	-6.25859
Trub2	-0.452152	4.07643	-0.993199	0.330508	0.560772	-5.7753
Coq4	-0.889019	3.82699	-2.02719	0.0538723	0.230115	-4.36097
Slc27a4	-1.07648	4.22903	-2.42526	0.0231761	0.154737	-3.62928
Urm1	-0.0390245	3.90572	-0.0794776	0.937311	0.971244	-6.25724
Odf2	-0.665081	5.92496	-1.44543	0.16125	0.386192	-5.25589
Gle1	0.413748	4.62051	0.94968	0.351727	0.577628	-5.8161
Sptan1	-0.986429	5.39443	-2.34671	0.0275148	0.1675	-3.78019
Set	-0.8183	8.13379	-1.12405	0.272092	0.504815	-5.64261
Zdhhc12	0.332807	3.85947	0.716501	0.480587	0.679056	-6.00542
Zer1	-0.25763	3.18712	-0.674508	0.506425	0.699657	-6.03416
Tbc1d13	-0.691733	3.38067	-1.50305	0.145852	0.36661	-5.17791
Endog	-0.160259	2.5468	-0.480544	0.635186	0.788878	-6.14502
Spout1	0.0259182	3.53343	0.0614913	0.951476	0.978244	-6.25852
Lrrc8a	-0.0981468	2.7041	-0.300511	0.766371	0.872781	-6.21515
Nup188	0.109736	4.43672	0.270137	0.789361	0.886502	-6.22383
Sh3glb2	-0.23516	3.16446	-0.656928	0.517469	0.707107	-6.04569
Miga2	0.253014	2.72807	0.798103	0.432626	0.642848	-5.94486
Dolpp1	0.00952332	3.2207	0.0233256	0.981583	0.991821	-6.26014
Crat	-0.491906	4.22215	-1.09663	0.28367	0.515855	-5.67165
Ptpa	-0.591842	5.69598	-1.30477	0.204325	0.435742	-5.43545
Ntmt1	0.164085	3.15181	0.342091	0.735255	0.850873	-6.20179
Asb6	-0.490117	3.08541	-1.39794	0.1749	0.402218	-5.31826
Ptges	-1.76648	3.23144	-4.75975	7.62297e-05	0.00843302	1.63639
Tor1b	-0.581204	4.36193	-1.22398	0.232822	0.465783	-5.53141
Tor1a	-0.504962	6.71857	-2.32009	0.0291464	0.171325	-3.83064
BC005624	-0.0733815	5.92502	-0.270927	0.78876	0.886322	-6.22361
Fnbp1	-0.0410511	7.10023	-0.200582	0.842713	0.91847	-6.24023
D330023K18Rik	-0.463159	3.22241	-1.12404	0.272097	0.504815	-5.64263
Gpr107	-0.986859	4.19538	-2.45803	0.0215605	0.149842	-3.56547
Ass1	-0.18774	3.16538	-0.376426	0.709903	0.835741	-6.18947
Fubp3	-0.251923	2.73312	-0.652396	0.520337	0.709103	-6.04862
Exosc2	-0.606695	3.45018	-1.31281	0.201644	0.432582	-5.42561
Abl1	-0.326321	4.24473	-0.678989	0.503631	0.697565	-6.03117
Nup214	-0.16067	5.53068	-0.348648	0.730389	0.84748	-6.19953
Prrc2b	0.26015	5.08595	1.01852	0.318574	0.549218	-5.75079
Pomt1	-0.309378	2.54205	-0.961015	0.346114	0.573724	-5.80563
Uck1	0.102548	3.89894	0.268298	0.79076	0.887183	-6.22432
Swi5	-0.0740703	7.59833	-0.279245	0.782446	0.881882	-6.22132
Golga2	-0.538234	4.85121	-1.07914	0.291236	0.524052	-5.68983
Ciz1	-0.643704	4.34167	-1.39766	0.174984	0.402228	-5.31863
1110008P14Rik	-0.266378	6.64921	-0.974527	0.339502	0.568225	-5.79301
Lcn2	-1.60678	12.6303	-4.28239	0.000256893	0.016591	0.500173
Ptges2	-0.182314	3.43409	-0.396414	0.695298	0.827149	-6.18177
Slc25a25	-0.84802	3.29644	-2.14364	0.0423878	0.2043	-4.15579
Naif1	-0.285905	2.51721	-1.07294	0.293953	0.526289	-5.69621
Fam102a	-1.27312	2.94884	-3.82904	0.000809107	0.0324318	-0.569301
Dpm2	-1.15251	4.67592	-2.07103	0.0492578	0.220748	-4.28464
St6galnac4	-0.567081	3.33026	-1.24676	0.224501	0.457032	-5.5049
St6galnac6	-0.329471	2.63143	-0.932561	0.360321	0.584202	-5.83168
Fpgs	-0.411901	2.33811	-1.52825	0.139506	0.35718	-5.14303
Cdk9	-0.0550449	6.43094	-0.231705	0.818728	0.903471	-6.23349
Sh2d3c	-1.1648	4.49111	-2.34498	0.0276179	0.167524	-3.78347
Tor2a	0.162786	4.65917	0.35212	0.727817	0.84645	-6.19832
Lrsam1	-1.18794	2.64257	-4.18551	0.000328572	0.0186091	0.270359
Rpl12	-0.249606	9.42379	-0.626968	0.536591	0.720244	-6.06467
Ralgps1	-1.02206	3.59516	-2.54648	0.0177048	0.136477	-3.39076
Zbtb34	0.00401299	3.74742	0.00935671	0.992612	0.9964	-6.26037
Zbtb43	-0.643125	3.46355	-1.6394	0.114155	0.322761	-4.98353
Mvb12b	-1.22793	5.78873	-2.81079	0.00967532	0.1046	-2.84916
Pbx3	0.0228815	5.19624	0.0499128	0.960604	0.98158	-6.25916
Mapkap1	-0.6555	6.07353	-1.44646	0.160966	0.386154	-5.25453
Gapvd1	-1.12057	6.49763	-2.1674	0.0403341	0.199813	-4.11299
Hspa5	-0.000361655	8.89907	-0.00116334	0.999081	0.999478	-6.26041
Rabepk	0.196591	3.63279	0.483721	0.632962	0.78749	-6.1435
Fbxw2	-0.224597	5.74482	-1.1267	0.270994	0.503646	-5.63978
Psmd5	-0.272139	5.3062	-0.646886	0.523836	0.711274	-6.05215
Phf19	-0.0634098	2.99625	-0.160033	0.874192	0.937465	-6.24756
Cntrl	-0.553202	7.36568	-2.23224	0.0351783	0.187772	-3.99459
Rab14	-0.130162	7.37109	-0.600591	0.553734	0.732403	-6.08067
Gsn	-1.07671	7.9963	-3.62676	0.0013427	0.0420114	-1.0394
Stom	0.428887	5.56962	1.78834	0.086336	0.285051	-4.75612
Ggta1	-0.400488	5.41958	-0.938235	0.357457	0.581431	-5.82654
Dab2ip	-0.717908	3.83482	-1.51802	0.142054	0.360662	-5.15724
Ttll11	0.280008	2.45248	0.850348	0.403524	0.620687	-5.90284
Ndufa8	-0.2909	7.17733	-1.52453	0.140429	0.358818	-5.1482
Rbm18	-0.14523	4.56922	-0.37366	0.711933	0.836583	-6.19051
Mrrf	-0.236607	3.40582	-0.53945	0.594539	0.759379	-6.11519
Gm13431	-1.16551	3.82806	-2.58529	0.0162246	0.130353	-3.31301
Ptgs1	-0.723531	6.1257	-1.49579	0.147725	0.369243	-5.18788
Pdcl	0.333357	4.38858	1.05753	0.300784	0.532792	-5.71193
Rc3h2	-0.522034	5.12352	-1.29772	0.206699	0.439156	-5.44404
Zbtb6	-0.653652	3.40435	-1.6631	0.10928	0.315447	-4.94838
Zbtb26	0.225183	2.76403	0.530823	0.600413	0.76359	-6.11977
Rabgap1	-0.597825	5.17039	-1.43979	0.162825	0.388	-5.26339
Strbp	0.14485	6.04327	0.567088	0.575913	0.747049	-6.10003
Dennd1a	-0.615217	6.03634	-1.3233	0.198188	0.428301	-5.4127
Nek6	-0.893256	2.72314	-2.91866	0.00751571	0.0918941	-2.62061
Psmb7	-0.417916	6.19593	-0.865256	0.395453	0.614588	-5.8904
Nr6a1	-0.065819	3.12611	-0.142981	0.887497	0.945194	-6.25015
Nr6a1os	0.18053	2.39644	0.508549	0.615705	0.774919	-6.13126
Rpl35	-0.0722195	8.35411	-0.149013	0.882786	0.94245	-6.24927
Arpc5l	-0.936424	5.33186	-1.75661	0.0917189	0.2922	-4.80583
Golga1	-0.137724	4.95107	-0.49959	0.621907	0.779091	-6.13575
Scai	-1.33147	4.10404	-2.87735	0.00828222	0.0971847	-2.70862
Ppp6c	-0.527367	5.66738	-1.24885	0.223749	0.45658	-5.50245
Arhgap15	-0.650323	9.67414	-3.22589	0.00360269	0.0616138	-1.94966
Gtdc1	-1.21236	5.52744	-3.95422	0.00059022	0.0271528	-0.275799
Zeb2	-0.217097	5.85921	-0.44369	0.661235	0.803705	-6.16197
Zeb2os	0.342565	2.40674	0.953592	0.349783	0.576487	-5.8125
Acvr2a	-0.799533	2.63864	-2.84341	0.00896682	0.101184	-2.78047
Orc4	-1.12776	4.52988	-2.17811	0.0394373	0.197383	-4.09357
Mbd5	-0.839881	6.75616	-3.42242	0.00222788	0.0504806	-1.50752
Epc2	-1.22957	5.52044	-3.04679	0.00554561	0.0766421	-2.34415
Mmadhc	-0.540562	5.52696	-1.27564	0.214275	0.447794	-5.47067
Rbm43	-0.693685	5.24148	-2.49138	0.0200232	0.145768	-3.5
Nmi	-0.282551	5.05109	-0.954249	0.349457	0.576232	-5.81189
Tnfaip6	-0.982453	2.91662	-3.06487	0.00531101	0.0758819	-2.30473
Rif1	-0.358439	6.3218	-0.685161	0.499797	0.694642	-6.02703
Arl5a	-0.698457	4.45085	-1.54093	0.136399	0.352586	-5.12529
Stam2	-0.25676	5.17939	-0.789368	0.437615	0.645908	-5.95164
Fmnl2	-0.544517	6.27533	-0.933904	0.359642	0.583289	-5.83047
Prpf40a	-0.0747997	7.77443	-0.460794	0.649088	0.797484	-6.15427
Arl6ip6	-0.301137	5.89855	-1.13663	0.2669	0.499425	-5.62908
Nr4a2	0.648176	3.05875	1.69139	0.10369	0.308711	-4.90589
Gpd2	-0.226106	6.41144	-0.958103	0.34755	0.574844	-5.80833
Cytip	-1.26252	5.93825	-2.85148	0.00879933	0.100805	-2.76342
Pkp4	-0.417244	3.70963	-0.889297	0.382658	0.604371	-5.86989
Tanc1	-0.398482	4.59186	-0.795759	0.433961	0.643742	-5.94669
Wdsub1	-0.727666	2.45054	-2.41814	0.0235416	0.155733	-3.64308
Baz2b	-0.500697	8.17357	-2.93804	0.00717983	0.0898593	-2.57912
March7	-0.617394	6.04728	-2.64507	0.0141689	0.124565	-3.19202
Cd302	0.514302	2.95303	0.916248	0.368639	0.590374	-5.84629
Ly75	-0.67059	7.34572	-2.52712	0.0184893	0.139535	-3.42929
Rbms1	-0.679717	7.73737	-2.65718	0.0137834	0.122568	-3.16733
Tank	-0.57853	6.91565	-2.74588	0.0112457	0.112849	-2.98469
Psmd14	0.151881	7.29175	0.793918	0.435012	0.644332	-5.94812
Dpp4	-0.856414	2.3223	-3.7799	0.000915426	0.0345428	-0.684032
Ifih1	-0.411187	5.01084	-0.985176	0.334352	0.564226	-5.78295
Gca	-0.441964	7.50181	-2.00346	0.0565268	0.235244	-4.40182
Galnt3	-1.96991	4.03054	-4.69053	9.09124e-05	0.00944271	1.47155
Stk39	-0.501733	4.21061	-1.16533	0.255322	0.487483	-5.5977
Cers6	-0.304876	8.26161	-1.46613	0.155575	0.378878	-5.22817
Nostrin	-0.498883	2.20833	-2.60478	0.0155256	0.127805	-3.27373
Spc25	-1.83814	5.71986	-3.36263	0.00258055	0.054676	-1.64296
Dhrs9	-2.30051	5.28171	-5.14324	2.88078e-05	0.00512454	2.54698
Fastkd1	0.482915	3.21263	1.31315	0.201533	0.432582	-5.4252
Ppig	-0.0849089	6.97965	-0.425392	0.674336	0.812656	-6.16989
Ccdc173	-0.208149	2.29225	-0.807948	0.427045	0.638973	-5.93713
Phospho2	-0.71714	3.87492	-1.81034	0.0827643	0.279694	-4.72125
Klhl23	-0.459332	4.93754	-0.887503	0.383604	0.604827	-5.87144
Ssb	0.0112482	7.78114	0.0520039	0.958955	0.98064	-6.25906
Mettl5	-0.495614	3.91586	-1.02613	0.315045	0.546222	-5.74331
Ubr3	-0.460028	5.35854	-1.74308	0.094102	0.295627	-4.82684
Gorasp2	-0.463532	5.45518	-1.04872	0.304737	0.536566	-5.72082
Tlk1	-0.903714	6.21616	-2.01019	0.0557624	0.233988	-4.39027
Mettl8	-0.0396669	3.25913	-0.0946946	0.925342	0.96451	-6.25591
Dcaf17	-0.29779	4.13844	-0.647133	0.523679	0.711274	-6.05199
Dync1i2	-0.617584	6.26545	-1.91366	0.0676463	0.255569	-4.55327
Slc25a12	-0.0443571	6.00761	-0.17533	0.862289	0.930445	-6.24499
Hat1	-0.461075	6.21822	-0.925232	0.364042	0.587682	-5.83827
Metap1d	-0.386452	2.80214	-0.987599	0.333188	0.562995	-5.78064
Itga6	-0.476656	4.61998	-0.970258	0.341581	0.569962	-5.79701
Pdk1	-0.295844	3.14637	-0.725313	0.475264	0.675337	-5.99918
Map3k20	-0.317629	6.05005	-0.69253	0.495242	0.690979	-6.02203
Cdca7	0.0427924	6.59571	0.175002	0.862544	0.93062	-6.24505
Sp3	-0.964378	7.06228	-3.77583	0.000924823	0.0346379	-0.693519
Gm11084	-1.42628	2.91548	-4.9399	4.8227e-05	0.00704185	2.06485
Sp3os	-0.32666	4.54704	-0.834525	0.412204	0.626388	-5.91583
Ola1	-0.165009	6.46578	-0.322175	0.750106	0.860812	-6.20841
Cir1	-1.51333	4.60685	-3.23693	0.00350741	0.0604055	-1.92507
Scrn3	-0.39788	3.25887	-0.899803	0.377152	0.598678	-5.86077
Wipf1	-0.779326	6.76771	-2.75934	0.0109015	0.110942	-2.95672
Gm13708	-0.578004	2.6746	-1.84169	0.0778953	0.273367	-4.67101
Atf2	0.0511294	6.12054	0.220954	0.826995	0.908153	-6.23592
Atp5g3	-0.0887265	7.66042	-0.391424	0.698932	0.828913	-6.18373
Lnpk	-0.588384	6.47328	-1.82943	0.0797685	0.275795	-4.69073
Mtx2	-0.858024	5.25335	-1.59512	0.123751	0.336972	-5.04814
Hnrnpa3	-0.89897	8.51882	-1.32137	0.198819	0.428866	-5.41508
Nfe2l2	-0.334813	7.58766	-1.70524	0.101043	0.305083	-4.88489
Agps	-0.0472077	8.13525	-0.171717	0.865098	0.931893	-6.24562
Rbm45	-0.0931296	3.84366	-0.244613	0.808833	0.898455	-6.23041
Prkra	-0.253008	4.15807	-0.536018	0.596872	0.761201	-6.11702
Plekha3	-0.317376	3.91359	-0.619954	0.541122	0.722905	-6.06899
Cwc22	-0.614028	4.75244	-1.25921	0.220048	0.453835	-5.49023
Ube2e3	-0.37495	5.72933	-0.819754	0.420412	0.632753	-5.92775
Itga4	-0.227158	6.65773	-0.897393	0.378411	0.599825	-5.86287
Itprid2	-0.00907536	3.90772	-0.0230151	0.981828	0.99187	-6.26015
Dnajc10	0.0456946	5.86039	0.190914	0.850196	0.922932	-6.24213
Nckap1	-0.191919	2.40032	-0.601297	0.553271	0.732046	-6.08025
Dusp19	-0.687737	2.45793	-2.4755	0.0207422	0.147197	-3.53125
Nup35	-0.245639	4.25344	-0.541536	0.593123	0.758498	-6.11407
Zc3h15	-0.0404595	6.49298	-0.187414	0.852909	0.924582	-6.24279
Itgav	-0.670642	4.38545	-1.4211	0.168134	0.393666	-5.28807
Calcrl	-1.16855	5.76441	-4.78452	7.1576e-05	0.00828883	1.69534
Tfpi	-0.0609256	2.92893	-0.141819	0.888405	0.945812	-6.25032
Ctnnd1	-0.125166	3.64596	-0.244854	0.808648	0.898349	-6.23035
Selenoh	-0.440956	6.53781	-0.791955	0.436134	0.645088	-5.94964
Tmx2	-0.59639	3.64315	-1.36254	0.18566	0.4142	-5.3636
Med19	0.808141	5.16187	2.91128	0.00764756	0.0926122	-2.63638
Zdhhc5	-0.368992	5.34386	-1.35589	0.187737	0.415688	-5.372
Clp1	-1.26237	3.8353	-3.20824	0.00376028	0.0626256	-1.98892
Ypel4	-0.47578	2.1267	-2.26453	0.0328403	0.181363	-3.93479
Ube2l6	-0.438168	5.55373	-1.48195	0.151346	0.373571	-5.20676
Timm10	0.00609816	3.89043	0.0126601	0.990004	0.995714	-6.26033
Slc43a1	-0.369744	2.95018	-1.02709	0.314605	0.545831	-5.74237
Slc43a3	-0.892079	5.94874	-1.48147	0.151474	0.373571	-5.20742
Prg2	-0.00243703	2.64117	-0.00427477	0.996625	0.998098	-6.26041
Ssrp1	-1.17932	6.69132	-1.6877	0.104406	0.309938	-4.91147
Tnks1bp1	-0.620968	2.84332	-1.62709	0.116759	0.327436	-5.00164
Ptprj	-1.33887	6.48094	-2.82937	0.00926565	0.102359	-2.81009
Nup160	-0.544702	4.89768	-1.05639	0.301292	0.532967	-5.71308
Fnbp4	0.271941	6.20222	1.28648	0.210529	0.443554	-5.45764
Mtch2	-0.159394	6.31792	-0.590411	0.560426	0.737018	-6.08667
Ndufs3	-0.378754	5.28638	-0.872116	0.391774	0.612173	-5.8846
Kbtbd4	-0.734527	2.96153	-1.8931	0.0704464	0.260101	-4.58724
Ptpmt1	-0.508074	4.08696	-1.131	0.269215	0.502099	-5.63515
Celf1	-0.419148	6.09738	-1.40146	0.173859	0.400737	-5.3137
Rapsn	-0.306927	3.01682	-0.787782	0.438525	0.646416	-5.95286
Psmc3	0.0877432	7.29769	0.384425	0.704044	0.830949	-6.18644
Slc39a13	-0.240805	2.68981	-0.633664	0.532284	0.717811	-6.0605
Spi1	-0.390437	9.00058	-2.19436	0.0381121	0.194027	-4.06402
Madd	-0.263305	3.47868	-0.597442	0.5558	0.733638	-6.08254
Acp2	-0.462677	3.75098	-1.0607	0.29937	0.531668	-5.70871
Ddb2	-0.523859	3.71788	-1.12303	0.272516	0.505263	-5.6437
Arfgap2	-0.315413	4.40079	-0.78992	0.437299	0.645788	-5.95121
1110051M20Rik	-0.0911398	2.6802	-0.218872	0.828598	0.909326	-6.23638
Lrp4	-0.329071	3.18828	-0.747277	0.462145	0.66576	-5.98331
Ckap5	-1.00725	7.01386	-1.93416	0.0649516	0.251108	-4.51914
Zfp408	-1.2865	3.18054	-3.67267	0.00119736	0.0393444	-0.933219
Arhgap1	-0.499259	5.2739	-1.21656	0.235586	0.468418	-5.53996
Atg13	-0.167402	3.983	-0.342465	0.734978	0.850649	-6.20167
Harbi1	-0.0256119	2.7727	-0.0663025	0.947685	0.976407	-6.25821
Ambra1	-0.0574434	6.00352	-0.258835	0.797966	0.891152	-6.22682
Dgkz	-0.240141	6.08255	-1.06219	0.298706	0.531182	-5.7072
Creb3l1	-0.889451	3.32878	-2.0826	0.0481007	0.218196	-4.26431
Phf21a	-0.28116	6.91883	-1.23578	0.228484	0.460656	-5.51774
Pex16	-0.806965	3.63353	-1.89219	0.0705732	0.260258	-4.58874
Cry2	0.0954205	3.48587	0.235412	0.815884	0.901418	-6.23262
Slc35c1	-1.00157	3.77525	-2.2455	0.0342007	0.185012	-3.97011
Cd82	-0.561024	5.39732	-1.5526	0.133588	0.348916	-5.10885
Ext2	-0.0730687	4.06387	-0.158732	0.875206	0.937754	-6.24777
Accs	0.0320276	2.63616	0.0916813	0.927711	0.965467	-6.25619
Alkbh3	-0.792191	3.86817	-1.68286	0.105349	0.311168	-4.91876
Hsd17b12	-0.382406	5.42465	-0.901546	0.376244	0.597655	-5.85925
Ttc17	-0.43448	5.16771	-1.79974	0.0844687	0.28245	-4.73809
2810002D19Rik	-0.226115	2.94574	-0.55331	0.585162	0.753131	-6.10768
Api5	-0.799813	6.23417	-1.66467	0.108963	0.315098	-4.94603
B230118H07Rik	-0.51119	5.408	-0.861832	0.397297	0.615905	-5.89327
Traf6	-0.485595	3.85408	-1.01284	0.321226	0.55115	-5.75634
Prr5l	-1.2896	3.11664	-2.7465	0.0112296	0.1128	-2.98341
Commd9	0.0147781	3.3413	0.0354297	0.97203	0.98682	-6.25978
Ldlrad3	-0.384832	4.19619	-0.6942	0.494212	0.690308	-6.02089
Trim44	-0.146033	4.08463	-0.32223	0.750064	0.860812	-6.20839
Cd44	-0.852515	7.92223	-3.31803	0.00287839	0.0573119	-1.74349
Pdhx	-0.188611	3.68515	-0.381169	0.706426	0.832719	-6.18768
Apip	-0.428948	4.9858	-1.07634	0.292463	0.525588	-5.69272
Cat	-1.37479	3.89095	-2.94903	0.00699582	0.0883245	-2.55555
Abtb2	-2.50014	4.87567	-4.59276	0.000116602	0.010775	1.23869
Nat10	-0.044034	2.89957	-0.105117	0.917155	0.960101	-6.25487
Caprin1	-0.248477	7.08652	-0.878978	0.388117	0.608982	-5.87876
Lmo2	-0.111218	7.14688	-0.396215	0.695442	0.827223	-6.18185
4931422A03Rik	-0.0472311	2.5331	-0.128582	0.898759	0.951381	-6.25211
Fbxo3	-0.586077	5.67019	-1.37696	0.181215	0.410002	-5.34525
Cd59a	-0.237676	2.19773	-1.00242	0.326128	0.555587	-5.76644
Hipk3	-1.17417	4.65358	-2.2017	0.0375272	0.192845	-4.05063
Cstf3	-0.779426	5.91824	-1.68172	0.105572	0.311462	-4.92047
Tcp11l1	-0.0106793	2.97639	-0.0231204	0.981745	0.99187	-6.26015
Qser1	-0.434882	3.89087	-0.951115	0.351013	0.577381	-5.81478
Eif3m	-0.434113	6.72576	-0.813111	0.424137	0.636079	-5.93305
Rcn1	0.709219	4.29454	1.71932	0.0984113	0.301412	-4.86341
Elp4	-0.125783	4.7746	-0.307449	0.76115	0.868743	-6.21304
Immp1l	0.12047	5.52749	0.463771	0.646984	0.796547	-6.1529
Dnajc24	-0.495441	4.39574	-1.08394	0.289144	0.521597	-5.68486
Arl14ep	-0.492665	4.2833	-1.08426	0.289007	0.521588	-5.68454
Mettl15	-0.501218	3.76676	-1.20146	0.241277	0.473577	-5.5572
Kif18a	-0.712398	5.30781	-1.73094	0.0962834	0.29857	-4.84557
Lin7c	-0.400857	4.73204	-1.00107	0.326764	0.556388	-5.76774
Ccdc34	-1.03538	5.67306	-1.82014	0.0812141	0.27756	-4.70561
Lpcat4	-0.241943	4.32826	-0.591835	0.559487	0.736648	-6.08583
Nop10	0.13986	7.3051	0.385395	0.703335	0.830565	-6.18606
Slc12a6	-0.595342	7.07187	-2.60474	0.0155269	0.127805	-3.27381
Emc4	-0.329645	4.86432	-0.625485	0.537547	0.720952	-6.06559
Katnbl1	-0.580018	4.72801	-1.11692	0.275068	0.507938	-5.65022
Emc7	-0.352335	5.73365	-0.755436	0.457327	0.662769	-5.9773
Aven	-0.49863	3.28599	-1.31769	0.20003	0.430528	-5.41962
Arhgap11a	-0.649383	5.68402	-2.82536	0.0093527	0.102922	-2.81854
Aqr	-0.391705	4.97992	-0.70848	0.485463	0.683583	-6.01104
Zfp770	-0.487925	2.49204	-1.66049	0.109808	0.315894	-4.95227
Dph6	-0.59499	3.45203	-1.25402	0.221895	0.454812	-5.49636
BC052040	-1.54331	4.11685	-3.07436	0.00519171	0.0748989	-2.284
Spred1	-0.0212191	3.60494	-0.0427908	0.966222	0.984495	-6.2595
Fam98b	-0.0652136	5.40519	-0.254917	0.800956	0.893152	-6.22783
Gm13986	-1.3671	3.8786	-2.54527	0.017753	0.136656	-3.39317
Thbs1	-1.39475	3.13897	-2.63695	0.014433	0.125303	-3.20853
Eif2ak4	-0.0872239	3.68015	-0.173629	0.863611	0.931224	-6.24529
Srp14	-0.16407	7.68548	-0.959694	0.346765	0.574425	-5.80686
Bub1b	-0.829841	5.60386	-1.45922	0.157451	0.38168	-5.23746
Plcb2	-0.265705	6.50581	-1.00968	0.322707	0.552468	-5.75941
Inafm2	0.163216	3.57687	0.363485	0.719421	0.841537	-6.19426
Knstrn	-0.585483	6.02569	-1.20817	0.238735	0.471249	-5.54957
Ivd	0.0544149	3.89667	0.131125	0.896768	0.950146	-6.25178
Bahd1	-0.158314	2.81366	-0.421432	0.677185	0.814514	-6.17157
Ccdc32	-0.320603	4.11645	-0.710752	0.484079	0.682016	-6.00946
Knl1	-1.3617	6.75775	-2.68018	0.0130781	0.120173	-3.12027
Rad51	-0.929465	5.09111	-1.762	0.0907855	0.291171	-4.79744
Rmdn3	-0.365638	3.87408	-0.72461	0.475687	0.675577	-5.99968
Dnajc17	-0.203613	3.671	-0.480964	0.634892	0.788722	-6.14482
Zfyve19	-0.279214	3.42637	-0.646743	0.523927	0.711301	-6.05224
Rhov	-0.558661	2.58069	-1.72752	0.0969043	0.299298	-4.85082
Vps18	-0.484466	3.68345	-1.07356	0.293679	0.526105	-5.69557
Chac1	-0.0330078	3.49198	-0.0777885	0.93864	0.971955	-6.25738
Ino80	0.196729	5.75479	0.872038	0.391816	0.612173	-5.88467
Exd1	0.150301	2.62838	0.45904	0.65033	0.798187	-6.15508
Chp1	-0.637897	6.1384	-2.71111	0.0121829	0.116123	-3.05664
Oip5os1	-0.261412	6.77523	-1.25091	0.223009	0.455835	-5.50003
Oip5	-0.585393	3.41827	-1.26728	0.217196	0.450827	-5.48064
Nusap1	-0.417279	7.39527	-1.73646	0.0952848	0.297507	-4.83706
Ndufaf1	0.0122055	3.59885	0.0351047	0.972286	0.986981	-6.2598
Rtf1	-0.588624	5.9469	-1.25526	0.221452	0.454698	-5.4949
Rpap1	-0.46298	2.933	-1.32787	0.196695	0.426711	-5.40704
Mga	-1.11228	4.6303	-2.06561	0.0498086	0.22187	-4.29414
Ehd4	-0.0683158	4.81828	-0.165211	0.87016	0.934817	-6.24672
Vps39	-0.472634	3.42333	-1.22827	0.23124	0.463907	-5.52646
Tmem87a	-0.17326	5.58797	-0.394234	0.696884	0.827733	-6.18263
Ganc	-0.0642975	4.66252	-0.155951	0.877374	0.939456	-6.24821
Zfp106	-0.450262	6.19119	-0.949893	0.351621	0.577628	-5.8159
Snap23	-0.734418	5.65827	-1.6434	0.113321	0.321697	-4.97763
Lrrc57	-0.630026	3.59737	-1.60831	0.120826	0.333349	-5.02905
Haus2	-0.346698	4.22215	-0.75965	0.454851	0.661273	-5.97417
Cdan1	-0.362293	3.38399	-0.898352	0.377909	0.599313	-5.86204
Ubr1	-0.651212	5.07109	-1.66799	0.108296	0.314536	-4.94107
Tmem62	-0.445282	2.77826	-1.20337	0.240554	0.472434	-5.55504
Ccndbp1	-0.781896	5.53764	-1.69566	0.102868	0.307696	-4.89943
Epb42	-0.396953	2.72989	-1.10796	0.278844	0.511442	-5.65973
Lcmt2	-0.321861	2.85871	-0.832028	0.413584	0.627538	-5.91786
Adal	-0.183702	2.91888	-0.51516	0.611147	0.771786	-6.1279
Zscan29	-1.71061	4.42166	-3.52077	0.00174732	0.0458174	-1.28317
Tubgcp4	-1.10364	4.34302	-2.62333	0.0148863	0.126314	-3.23618
Trp53bp1	0.79689	3.33788	1.90445	0.068888	0.25772	-4.56852
Ppip5k1	-0.58569	3.19094	-1.59134	0.124602	0.338374	-5.0536
Pdia3	0.0898686	9.2422	0.267533	0.791341	0.887243	-6.22453
Serf2	-0.313567	10.2537	-1.54727	0.134865	0.350468	-5.11637
Hypk	-0.868195	4.54336	-1.91208	0.0678572	0.255765	-4.55588
Mfap1b	-0.233957	4.46451	-0.572175	0.572517	0.744368	-6.09716
Mfap1a	-1.35749	4.17605	-2.57416	0.0166367	0.132417	-3.33537
Wdr76	-0.365	5.63798	-0.843849	0.407074	0.622915	-5.90821
Ctdspl2	-0.243497	6.10271	-0.866979	0.394527	0.613837	-5.88894
Eif3j1	-0.984711	4.93902	-1.78181	0.0874207	0.28652	-4.7664
Spg11	-0.295228	4.45473	-0.720403	0.478226	0.677367	-6.00267
B2m	-0.4134	9.76684	-2.50481	0.0194333	0.14407	-3.47349
Sord	-0.133894	4.02129	-0.251211	0.803786	0.894966	-6.22877
Slc28a2	-0.113842	5.85667	-0.495946	0.624437	0.780837	-6.13755
Gatm	-0.499849	7.42308	-0.79907	0.432076	0.642344	-5.94411
AA467197	-2.10093	6.76059	-3.86306	0.00074273	0.0313096	-0.489705
Bloc1s6	-0.99141	4.71603	-2.13215	0.0434136	0.207	-4.17637
Sqor	-0.759676	6.17958	-2.48767	0.0201891	0.146334	-3.50731
Myef2	0.408778	3.62092	0.986069	0.333923	0.563768	-5.7821
Dut	-0.147424	8.45526	-0.451149	0.655926	0.801219	-6.15865
Cep152	-0.686448	4.91963	-1.36392	0.185229	0.413693	-5.36184
Shc4	-0.857024	2.32736	-3.59503	0.00145308	0.043417	-1.11258
Eid1	-0.240682	6.27514	-1.12203	0.272936	0.505556	-5.64478
Secisbp2l	-0.379585	5.08131	-0.888197	0.383238	0.604812	-5.87084
Cops2	-0.977979	5.14078	-1.93735	0.0645404	0.250191	-4.51379
Galk2	-0.670127	3.96178	-1.37372	0.182208	0.41013	-5.34939
Dtwd1	-0.3989	4.23158	-0.714206	0.481979	0.680198	-6.00704
Atp8b4	0.117094	9.13405	0.452395	0.655042	0.800879	-6.15809
Hdc	-0.594612	7.51034	-1.77937	0.0878293	0.287299	-4.77024
Gabpb1	-0.941161	4.92209	-2.52431	0.0186057	0.140204	-3.43487
Gm27003	0.000178816	2.68287	0.000416902	0.999671	0.999831	-6.26041
Usp8	-0.509214	5.6947	-2.39487	0.024774	0.158708	-3.68802
Usp50	-0.00318139	3.02937	-0.00606313	0.995212	0.997423	-6.2604
Trpm7	-0.438136	6.20142	-1.73155	0.0961727	0.298503	-4.84463
Sppl2a	-0.43	6.05295	-1.69745	0.102525	0.307407	-4.89672
Ap4e1	-1.10384	3.44092	-2.55856	0.0172309	0.134776	-3.36662
Blvra	-0.96304	4.45257	-1.93347	0.06504	0.251193	-4.52028
Ncaph	-1.07092	5.0223	-2.52127	0.0187329	0.140534	-3.44092
Itpripl1	-0.686021	2.47134	-2.94634	0.0070404	0.0886984	-2.56132
1810024B03Rik	-0.206531	2.35376	-0.663488	0.513332	0.704367	-6.04142
Snrnp200	-0.097572	5.34953	-0.405533	0.688673	0.822753	-6.17812
Ciao1	0.0897647	4.3012	0.224284	0.824432	0.907085	-6.23518
Tmem127	0.0932946	5.31042	0.293821	0.771417	0.875729	-6.21714
Stard7	-0.679475	5.40473	-1.56221	0.131311	0.346506	-5.09525
Dusp2	-0.211664	3.10516	-0.474246	0.639605	0.791746	-6.14802
Fahd2a	-0.243214	2.92789	-0.763658	0.452503	0.659096	-5.97118
Kcnip3	-0.200886	3.845	-0.441921	0.662497	0.804854	-6.16275
Mrps5	-0.825584	4.89531	-1.31401	0.201248	0.432226	-5.42415
Mtln	-0.959849	3.89942	-1.83557	0.0788258	0.273994	-4.68087
Bub1	-0.810002	5.79819	-1.7296	0.096526	0.298679	-4.84763
Acoxl	-0.67979	2.69924	-1.59069	0.124748	0.338679	-5.05453
Bcl2l11	-0.386639	3.99756	-0.834765	0.412071	0.626375	-5.91564
Morrbid	-0.971322	7.10463	-3.99363	0.000534284	0.0249994	-0.183055
Anapc1	-0.741786	4.93525	-1.3663	0.184494	0.413114	-5.35883
Tmem87b	-0.217291	4.48027	-0.437036	0.665987	0.807445	-6.16489
Zc3h8	0.185707	3.08146	0.464234	0.646658	0.796308	-6.15269
Gm10762	0.0110868	3.13485	0.0299613	0.976345	0.98901	-6.25996
Zc3h6	-0.616471	2.75541	-2.10452	0.0459746	0.213159	-4.22559
Polr1b	0.314934	3.10216	0.854168	0.401446	0.618908	-5.89967
Chchd5	-0.380665	3.42159	-0.932329	0.360438	0.584281	-5.83189
Slc20a1	-0.735382	4.06267	-1.49482	0.147975	0.369329	-5.1892
Ckap2l	-1.06298	6.17199	-2.26477	0.0328237	0.181363	-3.93435
Gm14023	-0.729705	2.42533	-2.60256	0.0156037	0.128228	-3.27821
Il1b	-1.51077	6.47385	-2.06769	0.0495963	0.221491	-4.29049
Sirpa	-0.699095	6.58096	-2.38622	0.0252468	0.159775	-3.70465
Stk35	-0.620266	3.36438	-1.52455	0.140422	0.358818	-5.14817
Snrpb	-0.0818054	7.67594	-0.394511	0.696683	0.827733	-6.18252
Nop56	-0.210206	5.48094	-0.433688	0.668383	0.808883	-6.16634
Idh3b	-0.265566	5.29176	-0.601938	0.552852	0.731833	-6.07987
Pced1a	-0.19351	2.45751	-0.624447	0.538217	0.721424	-6.06623
Vps16	-0.390152	3.95212	-0.916584	0.368467	0.59032	-5.84599
Ptpra	-0.479377	6.45697	-2.23567	0.0349232	0.187554	-3.98827
Mrps26	-0.558146	5.12865	-1.02618	0.315024	0.546222	-5.74326
Ubox5	-0.562557	2.37809	-2.10253	0.0461634	0.213597	-4.2291
Fastkd5	-0.47003	2.13829	-2.06465	0.0499071	0.221895	-4.29582
Ddrgk1	-0.534765	4.4662	-1.06229	0.298663	0.531182	-5.7071
Itpa	-0.431981	5.27299	-1.03975	0.308803	0.540455	-5.7298
4930402H24Rik	-0.86922	4.60567	-1.73069	0.0963274	0.298612	-4.84595
Atrn	-0.0128349	7.53601	-0.0682009	0.94619	0.975528	-6.25808
1700037H04Rik	-0.775612	5.51177	-1.7065	0.100805	0.30481	-4.88297
Cenpb	-0.266775	4.57287	-0.667768	0.510644	0.702387	-6.03861
Cdc25b	-0.285408	3.73404	-0.597637	0.555672	0.733638	-6.08242
Pank2	-0.402255	5.69818	-1.4939	0.148216	0.369439	-5.19047
Rnf24	-1.40768	4.45949	-2.87178	0.00839095	0.0979593	-2.72043
Smox	-0.968423	3.82737	-2.00147	0.0567543	0.235793	-4.40522
Prnp	-0.800461	2.85864	-2.21566	0.0364364	0.190084	-4.02508
Rassf2	-0.521716	5.58849	-1.54521	0.135361	0.351135	-5.11926
Slc23a2	-0.278643	2.94582	-0.803321	0.429663	0.640197	-5.94078
Tmem230	-0.915193	4.01575	-2.17481	0.0397115	0.198558	-4.09956
Pcna	-0.493049	7.51404	-1.32845	0.196506	0.426626	-5.40632
Cds2	-1.58381	4.67884	-3.13781	0.00445788	0.0688852	-2.14477
Gpcpd1	-1.05802	6.24609	-2.93555	0.00722227	0.0901665	-2.58447
AU019990	-0.307658	2.29584	-0.955742	0.348717	0.575578	-5.81051
Shld1	-1.66466	2.9677	-5.62224	8.64087e-06	0.00241191	3.67223
Trmt6	0.288732	4.62108	0.944003	0.354562	0.57934	-5.82129
Mcm8	0.475613	3.52794	1.09697	0.283524	0.515855	-5.67129
Crls1	-1.27055	3.9432	-2.57095	0.0167574	0.132938	-3.34181
Tmx4	0.0465046	7.78831	0.240378	0.812076	0.899536	-6.23143
Plcb1	0.199772	4.35837	0.459773	0.649811	0.797715	-6.15474
Plcb4	-0.979444	3.70159	-2.05426	0.05098	0.224204	-4.31398
Slx4ip	-0.486179	4.96184	-1.16608	0.255025	0.487318	-5.59687
Tasp1	0.308559	3.12656	0.795624	0.434038	0.643742	-5.94679
Esf1	-0.0933835	4.51974	-0.180668	0.858143	0.928179	-6.24403
Ndufaf5	-0.415211	2.71921	-1.10738	0.279092	0.51171	-5.66035
Kif16b	-0.521717	4.39032	-1.21783	0.23511	0.468069	-5.5385
Snrpb2	-0.0968816	6.26582	-0.351706	0.728124	0.84645	-6.19846
Dstn	-0.273459	9.50796	-1.69014	0.103932	0.308883	-4.90778
Rrbp1	0.291638	7.2688	1.44275	0.161997	0.387217	-5.25946
Snx5	-0.361301	5.74358	-0.759755	0.454789	0.661273	-5.97409
Mgme1	-1.16056	3.52565	-2.86954	0.00843511	0.0982471	-2.72518
Kat14	-0.382379	3.43751	-0.806634	0.427788	0.639514	-5.93817
Polr3f	-0.359454	3.64234	-0.905274	0.374306	0.596277	-5.85598
Rbbp9	0.477341	2.61999	1.44628	0.161016	0.386154	-5.25477
Sec23b	-0.100398	5.13292	-0.240873	0.811697	0.899455	-6.23131
Smim26	-0.0377984	3.59513	-0.0914866	0.927864	0.965475	-6.25621
Dtd1	-0.0822346	4.47381	-0.161777	0.872834	0.936418	-6.24728
Rin2	-1.39248	4.23353	-2.90475	0.00776592	0.0933671	-2.65031
Naa20	-1.21963	4.54336	-2.34265	0.0277584	0.16756	-3.78792
Crnkl1	-0.312866	5.49329	-1.31799	0.199933	0.430502	-5.41925
Ralgapa2	-1.3882	4.92671	-3.63384	0.00131919	0.0415552	-1.02304
Kiz	-0.391243	4.94339	-0.972348	0.340562	0.56911	-5.79506
Xrn2	-0.676905	6.63737	-1.33459	0.194516	0.424584	-5.39869
Cd93	-0.579918	3.46985	-1.21033	0.237922	0.470243	-5.5471
Nxt1	-0.613163	5.9203	-1.30275	0.205005	0.436666	-5.43792
Gzf1	0.428695	5.10967	1.70663	0.100782	0.30481	-4.88278
Cst3	-0.367813	8.67645	-1.54519	0.135366	0.351135	-5.11929
Zfp120	-1.02542	4.02058	-2.14017	0.0426947	0.20508	-4.162
Cst7	-0.42408	5.90402	-0.637127	0.530064	0.715991	-6.05833
Apmap	-0.00714401	5.89979	-0.0267566	0.978875	0.990276	-6.26005
Acss1	-0.437096	2.70609	-1.20833	0.238676	0.471249	-5.54939
Entpd6	0.318735	2.68627	0.779147	0.443497	0.651062	-5.95948
Pygb	0.340057	3.18585	0.876989	0.389175	0.609597	-5.88046
Abhd12	-0.300699	4.36843	-0.769333	0.449191	0.656264	-5.96692
Gins1	-0.428685	4.42025	-0.761768	0.453609	0.660134	-5.97259
Nanp	-0.599133	4.49496	-1.25001	0.223329	0.456212	-5.50108
Nsfl1c	-0.140746	5.16922	-0.300159	0.766637	0.872852	-6.21526
Fkbp1a	0.565317	5.56109	2.0008	0.0568311	0.236016	-4.40637
Psmf1	-0.756163	4.49079	-1.62031	0.118214	0.329735	-5.01156
Fam110a	-0.792298	4.37408	-1.77786	0.0880827	0.287439	-4.77261
Csnk2a1	-0.780218	6.78727	-1.55344	0.133389	0.348881	-5.10767
Tbc1d20	-0.509855	5.37746	-1.25337	0.222128	0.454812	-5.49713
Rbck1	0.0146731	4.75519	0.0461654	0.96356	0.983274	-6.25934
Gm14164	0.161336	2.57824	0.402241	0.691061	0.824242	-6.17945
Zcchc3	0.570137	2.55677	1.35239	0.188839	0.416951	-5.37642
H13	-0.24589	6.6159	-0.992109	0.331028	0.561333	-5.77634
Id1	-0.436759	6.29586	-1.43584	0.163935	0.388932	-5.26863
Bcl2l1	-0.464811	4.50617	-1.19989	0.241877	0.474241	-5.55899
Tpx2	-0.429552	7.53656	-1.8099	0.0828349	0.279773	-4.72195
Pdrg1	0.0206358	4.01464	0.0455098	0.964077	0.983403	-6.25937
Ccm2l	0.0412838	2.69168	0.0992036	0.921799	0.962733	-6.25547
Hck	-1.08241	6.87551	-4.32185	0.000232366	0.0155039	0.593923
Tm9sf4	-0.598248	4.99661	-1.11165	0.277285	0.510294	-5.65583
Plagl2	-0.125918	5.68264	-0.548732	0.588251	0.755948	-6.11018
Pofut1	-0.619159	4.06345	-1.41963	0.168556	0.394145	-5.28999
Kif3b	-0.623932	5.3822	-1.75129	0.0926495	0.293536	-4.81411
2500004C02Rik	-0.548366	2.39101	-2.27146	0.0323571	0.180508	-3.92188
Asxl1	-1.12386	6.25375	-2.54045	0.0179457	0.137505	-3.40278
Nol4l	-0.130299	2.59259	-0.36914	0.715255	0.838737	-6.19219
Commd7	-0.172033	5.85595	-0.5775	0.568973	0.742058	-6.09413
Dnmt3b	0.179469	2.79103	0.473455	0.640161	0.792142	-6.14839
Mapre1	-0.311834	7.08698	-1.84381	0.0775743	0.272891	-4.66758
Cdk5rap1	-0.343074	2.77988	-0.860551	0.397989	0.616598	-5.89435
Cbfa2t2	-0.642934	4.46494	-1.39504	0.175763	0.402823	-5.32201
E2f1	-0.147117	5.12464	-0.34792	0.730929	0.847986	-6.19979
Pxmp4	-1.08692	4.3166	-2.45016	0.0219386	0.151149	-3.58084
Zfp341	-0.417357	2.67125	-1.07584	0.292679	0.525588	-5.69323
Chmp4b	-0.30976	7.45983	-1.62985	0.116171	0.326388	-4.99759
Raly	-0.194952	7.2228	-0.919934	0.366748	0.589691	-5.84301
a	-0.417484	2.71967	-1.17115	0.253018	0.484993	-5.59125
Eif2s2	-0.117938	7.30493	-0.404349	0.689532	0.823447	-6.1786
Ahcy	-0.31966	2.59222	-0.969771	0.341819	0.56999	-5.79747
Itch	-0.941444	6.20025	-2.1004	0.0463673	0.214289	-4.23288
Dynlrb1	-0.134198	7.33886	-0.563324	0.578432	0.748849	-6.10214
Map1lc3a	-0.881742	5.52745	-2.09524	0.0468641	0.215695	-4.24202
Pigu	-0.486598	4.62334	-0.998922	0.327784	0.557748	-5.76981
Trp53inp2	-2.24371	3.66463	-5.06477	3.51377e-05	0.00570987	2.36115
Ncoa6	-0.559194	5.73864	-1.27904	0.213096	0.44635	-5.4666
Acss2	-0.283049	3.37934	-0.594541	0.557706	0.735264	-6.08425
Gss	-0.198461	2.6269	-0.606608	0.549799	0.729325	-6.07708
Trpc4ap	-0.4555	5.25723	-1.00605	0.324413	0.553882	-5.76293
Edem2	-0.293928	5.7364	-0.613827	0.545096	0.725666	-6.07272
BC029722	0.221489	3.4558	0.537281	0.596014	0.760684	-6.11635
Eif6	-0.485936	5.98755	-1.01827	0.31869	0.549252	-5.75103
Uqcc1	-0.297124	4.34221	-0.586152	0.563238	0.738595	-6.08915
Cep250	-0.72337	5.21121	-1.67208	0.107478	0.313959	-4.93495
Ergic3	-0.22937	5.25056	-0.521812	0.606577	0.768133	-6.12448
Cpne1	-0.632018	5.75413	-1.46861	0.154907	0.378257	-5.22483
Nfs1	0.338107	4.32378	0.809588	0.42612	0.638008	-5.93584
Romo1	-0.0139777	7.07832	-0.0415905	0.967169	0.985061	-6.25955
Rbm39	-0.427553	8.36731	-2.71495	0.0120758	0.11552	-3.04872
Phf20	-0.471937	4.97187	-0.917624	0.367933	0.589899	-5.84507
Scand1	-0.692167	7.37912	-3.20634	0.00377765	0.0626256	-1.99315
Cnbd2	-0.525404	3.95565	-1.25807	0.220452	0.45425	-5.49157
2900097C17Rik	-0.146247	4.82624	-0.33792	0.738357	0.852918	-6.20321
Aar2	0.175385	3.36333	0.450703	0.656244	0.801315	-6.15885
Dlgap4	-0.591044	4.19569	-1.3297	0.196098	0.426071	-5.40477
5430405H02Rik	-1.04782	3.47598	-2.63823	0.014391	0.125098	-3.20593
Rab5if	-0.170236	8.21706	-1.05945	0.299928	0.532189	-5.70998
Ndrg3	-0.778645	3.3985	-2.08945	0.0474266	0.216798	-4.25224
Dsn1	-1.40238	4.24746	-3.12289	0.00462087	0.0699415	-2.1776
Samhd1	-1.08937	6.82836	-3.08306	0.00508472	0.0740813	-2.26499
Rbl1	-0.891204	5.8137	-2.02792	0.0537918	0.230115	-4.3597
Rpn2	-0.792817	5.89686	-1.52146	0.141193	0.359665	-5.15247
Manbal	-0.620366	4.13001	-1.38999	0.177273	0.404904	-5.32853
Blcap	-1.10243	2.97242	-3.21265	0.0037203	0.06247	-1.97912
Ctnnbl1	-0.305334	4.98105	-0.711013	0.48392	0.681982	-6.00927
Tti1	-0.193403	3.8517	-0.427558	0.672779	0.811475	-6.16897
Rprd1b	0.0366216	5.86199	0.153331	0.879417	0.940495	-6.24861
Tgm2	-0.637629	2.47032	-2.05289	0.051123	0.224429	-4.31637
Lbp	-0.445629	6.65649	-1.81338	0.0822806	0.279399	-4.7164
Ralgapb	-0.590945	5.12349	-1.4509	0.159734	0.384144	-5.2486
Slc32a1	-0.114043	2.38951	-0.421926	0.676829	0.814312	-6.17136
Actr5	0.0822823	4.17893	0.207236	0.837571	0.91554	-6.23887
Fam83d	0.220904	3.37169	0.432025	0.669575	0.809742	-6.16706
Dhx35	-0.396252	2.9668	-1.08974	0.286635	0.518837	-5.67884
Top1	-0.540446	7.83866	-1.92485	0.0661625	0.252687	-4.53466
Zhx3	-0.739908	3.42208	-1.97676	0.0596508	0.240585	-4.44736
Chd6	-0.338342	5.02358	-0.837363	0.410638	0.62514	-5.91352
Srsf6	0.0903121	6.58313	0.33201	0.74276	0.855772	-6.20519
Ift52	-0.277343	4.73102	-0.716327	0.480692	0.679056	-6.00555
Mybl2	-0.044683	4.88638	-0.105712	0.916688	0.959845	-6.2548
Oser1	-0.716919	5.50211	-1.57182	0.129066	0.34452	-5.08158
2900093K20Rik	-0.202432	2.95934	-0.600378	0.553874	0.732416	-6.0808
Ttpal	-0.466336	3.33512	-1.17319	0.252217	0.484385	-5.58899
Serinc3	-0.605863	7.13112	-2.41295	0.0238118	0.15647	-3.65314
Pkig	-0.187147	5.91499	-0.404295	0.689571	0.823447	-6.17862
Ada	-1.52759	4.93099	-3.40348	0.00233419	0.0514595	-1.55051
Ywhab	-0.193912	8.26824	-1.17584	0.251176	0.482847	-5.58604
Pabpc1l	-1.70748	3.42161	-4.10469	0.000403336	0.021055	0.0790535
Tomm34	0.0124343	5.58363	0.0472671	0.962691	0.982686	-6.25929
Stk4	-0.450741	7.29345	-2.12771	0.0438165	0.207962	-4.18431
Slpi	-0.951108	8.77913	-2.18754	0.0386635	0.195451	-4.07644
Sys1	-0.830266	5.99638	-3.20122	0.0038248	0.0631584	-2.00452
Pigt	0.0232527	4.67923	0.0584661	0.953861	0.979029	-6.2587
Dnttip1	-0.265778	5.02194	-0.634327	0.531859	0.717622	-6.06009
Ube2c	-0.868056	8.42584	-3.25936	0.00332121	0.059155	-1.875
Acot8	-0.362416	4.60104	-0.930227	0.361503	0.585083	-5.83379
Zswim3	-0.742037	2.86728	-2.00023	0.0568967	0.236136	-4.40735
Zswim1	-0.443328	2.4693	-1.65925	0.11006	0.316215	-4.95412
Ctsa	-0.379571	4.53384	-0.75633	0.456801	0.662388	-5.97664
Pcif1	-0.898254	5.4429	-2.26693	0.0326726	0.181086	-3.93033
Zfp335	-0.53879	3.16688	-1.5508	0.134018	0.349466	-5.11139
Zfp335os	-1.30407	2.73178	-5.31025	1.88977e-05	0.00398457	2.94125
Mmp9	-2.41927	7.11307	-3.54005	0.00166577	0.044905	-1.23898
Ncoa5	-0.673898	3.69634	-1.49776	0.147216	0.368771	-5.18518
Slc35c2	-0.659661	5.10513	-1.67371	0.107154	0.313557	-4.93251
Elmo2	-0.246549	4.04167	-0.558127	0.58192	0.751165	-6.10503
Trp53rka	0.353053	2.67575	1.08586	0.288313	0.520672	-5.68288
Zmynd8	-0.0113259	6.40671	-0.0516166	0.959261	0.980675	-6.25908
Ncoa3	-1.16681	4.85466	-3.20688	0.0037727	0.0626256	-1.99194
5031425F14Rik	-1.14547	2.41145	-4.75748	7.66717e-05	0.00843302	1.63098
Prex1	-0.403888	5.58358	-1.18945	0.245881	0.477588	-5.57079
Trp53rkb	-0.444988	3.19935	-1.2593	0.220014	0.453835	-5.49012
Arfgef2	-1.12316	4.90405	-2.67841	0.013131	0.120173	-3.12389
Cse1l	-0.628375	4.77659	-1.27355	0.215002	0.44885	-5.47317
Stau1	-0.35796	4.78417	-0.943138	0.354995	0.579463	-5.82208
Ddx27	0.206203	4.91371	0.358653	0.722986	0.843765	-6.196
Znfx1	-0.632497	5.40586	-2.45105	0.0218957	0.151149	-3.57911
Zfas1	-0.0754283	4.6819	-0.172545	0.864454	0.931583	-6.24547
B4galt5	-0.314337	4.15844	-0.770281	0.448639	0.655933	-5.96621
Slc9a8	-0.519165	4.05671	-1.24075	0.226671	0.459279	-5.51193
Spata2	-0.375687	3.15991	-0.901248	0.376399	0.597671	-5.85951
Rnf114	-0.649876	4.65227	-1.47352	0.153589	0.376188	-5.2182
Gm11476	-0.0170011	3.37593	-0.0413203	0.967382	0.985124	-6.25956
Ube2v1	-0.136091	5.61014	-0.291872	0.772889	0.876602	-6.21771
Tmem189	-0.347962	5.23245	-1.11674	0.275146	0.507938	-5.65042
Cebpb	-0.0733116	7.78854	-0.373797	0.711833	0.836583	-6.19046
Ptpn1	-0.37127	7.41628	-1.63384	0.115325	0.324463	-4.99173
Adnp	0.176223	6.24855	0.749631	0.460752	0.665245	-5.98158
Dpm1	-0.22665	6.65639	-0.895332	0.379489	0.600873	-5.86467
Mocs3	-0.376144	2.81581	-1.13187	0.268857	0.501618	-5.63422
Nfatc2	-0.508923	2.52474	-1.51098	0.14383	0.363543	-5.16698
Zfp64	0.181017	3.25999	0.351542	0.728245	0.846455	-6.19852
Zfp217	0.0287034	5.80566	0.110922	0.912599	0.95853	-6.25424
Pfdn4	-0.266288	5.06682	-0.612236	0.546131	0.726659	-6.07369
Fam210b	0.103695	4.55707	0.239563	0.8127	0.899676	-6.23163
Aurka	-0.534393	6.23767	-1.88535	0.0715277	0.262051	-4.59997
Cstf1	-0.295113	3.77615	-0.586957	0.562706	0.738089	-6.08868
Cass4	0.539861	3.66417	1.29637	0.207158	0.439671	-5.44568
Rtf2	-0.315909	6.46355	-1.42833	0.166064	0.391371	-5.27855
Rae1	-0.0908007	5.26502	-0.202511	0.841222	0.91753	-6.23984
Rbm38	0.086716	5.76505	0.382479	0.705468	0.831978	-6.18718
Zbp1	-1.00151	3.33856	-2.03754	0.0527498	0.227972	-4.34306
Rab22a	-0.650991	5.12129	-1.66845	0.108203	0.314536	-4.94038
Vapb	0.0275372	5.52986	0.110578	0.912869	0.958536	-6.25428
Stx16	-0.23243	5.19698	-0.834904	0.411994	0.626375	-5.91553
Npepl1	-0.136002	3.25883	-0.272186	0.787804	0.885472	-6.22327
Gnas	-0.600806	8.09771	-0.948247	0.352441	0.578193	-5.81741
Gm20721	-0.527816	2.52308	-1.94944	0.0630046	0.247292	-4.49352
Nelfcd	-0.421879	4.30744	-0.851399	0.402951	0.62028	-5.90197
Ctsz	-0.510314	6.19157	-1.01667	0.319435	0.550008	-5.7526
Atp5e	-0.26214	8.10319	-0.863137	0.396593	0.615239	-5.89218
Prelid3b	-0.820343	5.24785	-1.51043	0.14397	0.363667	-5.16774
Zfp831	-1.24833	3.66777	-2.70048	0.0124839	0.117401	-3.07856
Gm14325	0.323114	2.37096	1.05509	0.301875	0.53349	-5.7144
Gm14326	-0.323648	2.36808	-1.0072	0.323873	0.553524	-5.76182
Zfp971	-0.411668	3.04938	-1.05803	0.300558	0.532792	-5.71142
Sycp2	-1.0254	3.17659	-2.21121	0.0367808	0.190881	-4.03323
Ppp1r3d	-1.05087	3.29465	-2.5896	0.0160674	0.130024	-3.30434
Fam217b	-1.1232	4.11431	-2.82514	0.00935748	0.102922	-2.819
Taf4	-0.414518	4.33481	-1.10843	0.278644	0.51134	-5.65923
4921531C22Rik	-0.329516	2.86194	-1.04452	0.306639	0.538595	-5.72504
Lsm14b	-0.294723	2.90422	-0.741923	0.465323	0.667159	-5.98722
Psma7	0.242346	8.18083	1.16061	0.257197	0.489472	-5.6029
Mtg2	-0.932089	3.33334	-2.25151	0.0337658	0.184086	-3.95898
Osbpl2	-0.910606	5.07004	-2.28069	0.0317244	0.178661	-3.90467
Adrm1	-0.106263	5.18025	-0.243558	0.80964	0.898757	-6.23066
Rps21	-0.093803	9.82066	-0.268119	0.790895	0.887183	-6.22437
Cables2	-0.0104083	4.19545	-0.0233942	0.981529	0.991821	-6.26014
Slco4a1	0.467462	3.72495	1.01925	0.318234	0.54896	-5.75007
Mrgbp	-0.172572	4.52354	-0.33917	0.737427	0.852534	-6.20279
Ogfr	-0.453339	4.57336	-0.911712	0.370975	0.592831	-5.85031
Dido1	-0.933964	5.5766	-2.25192	0.033736	0.184023	-3.95821
Gid8	-0.29421	6.23597	-1.19411	0.244086	0.476213	-5.56553
Slc17a9	-1.69844	5.13245	-3.85874	0.000750861	0.0314479	-0.499831
Ythdf1	-0.240455	5.18543	-0.592184	0.559258	0.736619	-6.08563
Arfgap1	-0.861133	4.16563	-1.84473	0.0774363	0.272646	-4.6661
Col20a1	-0.475268	2.45259	-1.71215	0.0997449	0.303673	-4.87437
Ppdpf	-0.433076	4.16284	-0.83227	0.41345	0.627525	-5.91767
Helz2	-0.952412	3.13807	-2.53008	0.0183675	0.139032	-3.42342
Gmeb2	-0.966802	4.71696	-2.10902	0.045548	0.211863	-4.21759
Rtel1	-0.720202	3.35119	-1.73431	0.0956732	0.297778	-4.84038
Arfrp1	-0.664992	4.87351	-1.72491	0.0973824	0.300039	-4.85484
Zgpat	-0.782299	3.22152	-1.96839	0.0606616	0.242046	-4.46156
Tpd52l2	-0.150709	6.04881	-0.647222	0.523623	0.711274	-6.05193
Dnajc5	-0.73614	6.41778	-1.52843	0.139462	0.357163	-5.14277
Uckl1	-0.612757	4.36807	-1.36671	0.184365	0.412957	-5.35831
Zfp512b	-0.728726	2.69303	-2.51659	0.0189296	0.141691	-3.45019
Prpf6	-0.895205	5.14241	-1.70756	0.100606	0.304723	-4.88137
Samd10	-0.686277	3.20926	-1.60769	0.120963	0.333349	-5.02995
Rgs19	-0.369161	6.91429	-1.63797	0.114455	0.323189	-4.98564
Pcmtd2	-1.12802	3.65999	-2.77414	0.0105346	0.109419	-2.92589
Polr3k	0.85764	5.12464	3.51851	0.00175714	0.0458174	-1.28835
Pex2	-0.663241	4.56958	-1.7217	0.0979726	0.300684	-4.85976
Mrps28	0.365423	4.85279	0.84308	0.407496	0.623038	-5.90884
Tpd52	-0.756123	6.64645	-2.0199	0.0546755	0.231549	-4.37355
Zfp704	0.390287	5.21475	0.802597	0.430073	0.6405	-5.94134
Pag1	-1.28675	7.27779	-3.86655	0.00073623	0.031166	-0.481529
Fabp5	-0.811008	6.28095	-2.19149	0.0383437	0.194614	-4.06926
Impa1	-0.972365	5.79079	-1.6872	0.104502	0.309938	-4.91222
Zfand1	-0.736513	3.33869	-1.76116	0.0909296	0.291171	-4.79874
Snx16	-0.297368	2.49786	-0.923232	0.365062	0.588259	-5.84006
Lrrcc1	-0.714949	4.85993	-1.38317	0.179328	0.407563	-5.3373
Rbis	-0.267848	5.01734	-0.48288	0.63355	0.787833	-6.14391
Car1	-0.25436	5.80253	-0.756949	0.456437	0.662272	-5.97618
Car2	-0.460233	7.63295	-1.44036	0.162665	0.387904	-5.26263
Gm9733	-1.23711	4.64845	-2.55443	0.0173915	0.135408	-3.37487
Sirpb1b	-0.733318	4.28265	-1.18305	0.248361	0.479996	-5.57798
Sirpb1c	-1.19996	3.24381	-3.15289	0.00429876	0.0672516	-2.11151
Gm5150	-0.89751	4.46546	-1.65207	0.111527	0.318491	-4.96479
Ythdf3	-0.248629	6.17089	-1.01014	0.322488	0.552374	-5.75896
Armc1	-0.854409	4.91226	-1.70373	0.101328	0.305288	-4.88718
Mtfr1	-0.588521	3.9751	-1.40248	0.173556	0.400462	-5.31237
Pde7a	-0.020162	4.871	-0.0476477	0.962391	0.982479	-6.25927
Hps3	0.143513	5.16394	0.477707	0.637174	0.789902	-6.14638
Hltf	-0.894181	5.34916	-1.62008	0.118262	0.32978	-5.01189
Gyg	-0.318588	6.98199	-1.8151	0.0820087	0.278758	-4.71366
Cpa3	-0.639379	2.35171	-1.93273	0.0651354	0.25126	-4.52151
Gm43672	-0.469587	2.85054	-1.40492	0.172839	0.399667	-5.3092
Tbl1xr1	-0.216283	6.8683	-1.00816	0.32342	0.553407	-5.76088
Ect2	-1.31377	5.52063	-2.53769	0.0180569	0.137612	-3.40827
Nceh1	-1.55267	5.16348	-2.64322	0.0142287	0.124656	-3.19578
Fndc3b	0.449847	6.29529	1.9796	0.0593109	0.240167	-4.44253
Pld1	-0.325919	5.80984	-0.952496	0.350327	0.576704	-5.81351
Tnik	-0.185337	2.34123	-0.660071	0.515484	0.706026	-6.04365
Rpl22l1	-0.0998864	7.78752	-0.270622	0.788992	0.886384	-6.22369
Mynn	-0.960266	3.60076	-2.39043	0.025016	0.158913	-3.69658
Sec62	-0.230577	7.04082	-0.93207	0.360569	0.584323	-5.83212
Gpr160	-0.452662	6.10317	-0.983002	0.335399	0.565264	-5.78501
Phc3	-0.447022	4.62206	-0.899565	0.377276	0.598765	-5.86098
Prkci	-0.24109	3.04377	-0.558492	0.581675	0.751086	-6.10482
Skil	-1.85373	4.0327	-4.79096	7.04129e-05	0.00824895	1.71067
Pik3ca	-0.168926	5.7124	-0.529892	0.601048	0.764108	-6.12026
Zfp639	-0.518517	4.07179	-1.19669	0.243097	0.475205	-5.56261
Mfn1	-0.23421	3.39981	-0.547933	0.588791	0.756256	-6.11061
Actl6a	-0.281794	5.95511	-0.879854	0.387651	0.608708	-5.87801
Mrpl47	-0.145182	3.65469	-0.363279	0.719572	0.841569	-6.19433
Ndufb5	-0.538132	7.04595	-0.953676	0.349741	0.576487	-5.81242
Ttc14	-0.594658	5.71472	-1.29524	0.207542	0.440394	-5.44706
Fxr1	-0.524916	6.20836	-1.12847	0.270258	0.503393	-5.63787
Dnajc19	-0.352965	5.74794	-0.761993	0.453477	0.660038	-5.97243
Atp11b	-0.292453	7.87423	-1.55484	0.133054	0.348458	-5.10568
Dcun1d1	-0.612092	4.86197	-1.42807	0.166138	0.391371	-5.2789
Gm15952	-0.395906	2.26819	-1.59405	0.123992	0.337292	-5.04969
Mccc1	0.439302	2.50046	1.17844	0.250158	0.481436	-5.58314
Acad9	-0.679406	3.58911	-1.49287	0.148482	0.36992	-5.19187
Anxa5	0.274516	6.62939	0.879075	0.388065	0.608982	-5.87867
Exosc9	-0.0100714	4.81765	-0.0242519	0.980852	0.99148	-6.26012
Ccna2	-1.15267	6.37967	-2.50114	0.0195929	0.144933	-3.48075
4932438A13Rik	-0.168253	7.0451	-0.746566	0.462566	0.665921	-5.98383
Nudt6	-0.429659	2.65964	-1.19809	0.242564	0.4749	-5.56103
Spata5	-0.293191	4.7391	-0.557294	0.58248	0.751599	-6.10549
Hspa4l	-1.18167	5.37809	-2.23804	0.0347474	0.186909	-3.98389
Plk4	-1.09749	5.92212	-1.84192	0.0778602	0.273367	-4.67064
Mfsd8	-1.0885	3.01694	-3.20063	0.00383025	0.0631584	-2.00582
Abhd18	-0.788348	3.58908	-1.91738	0.0671492	0.254621	-4.54709
6430590A07Rik	-0.618476	2.41018	-2.39181	0.0249407	0.158913	-3.69392
Larp1b	-0.138961	6.55455	-0.556468	0.583035	0.751685	-6.10594
Pgrmc2	-0.00501806	5.07365	-0.0120153	0.990513	0.995754	-6.26034
Jade1	-0.687182	5.221	-1.6005	0.122551	0.335445	-5.04037
Sclt1	-0.571303	5.01037	-1.79562	0.085139	0.283626	-4.74461
D3Ertd751e	-0.634533	3.04337	-1.75681	0.0916842	0.2922	-4.80552
Slc7a11	-0.37384	5.21283	-0.819501	0.420553	0.632871	-5.92796
Noct	-0.85467	4.74165	-1.81278	0.0823755	0.279455	-4.71736
Elf2	-0.143823	6.8916	-0.558696	0.581537	0.751056	-6.10471
Ndufc1	-0.254765	6.83131	-0.669839	0.509345	0.701716	-6.03725
Naa15	-0.0203571	5.84847	-0.0442197	0.965095	0.984043	-6.25943
Rab33b	-1.66433	3.36815	-4.55495	0.000128386	0.010926	1.14862
Setd7	-0.0166196	5.56816	-0.0743784	0.941325	0.973601	-6.25764
Mgst2	-0.577479	8.04701	-3.08659	0.00504181	0.0736638	-2.25726
Maml3	-0.281367	4.64524	-0.54511	0.590701	0.756972	-6.11214
Cog6	0.449729	3.556	1.11351	0.276502	0.509466	-5.65385
Nhlrc3	0.372763	3.20954	0.798766	0.432249	0.642506	-5.94434
Proser1	-0.35077	3.66212	-0.788869	0.437901	0.646047	-5.95202
Ufm1	-0.273598	5.37761	-0.636189	0.530666	0.716587	-6.05892
Supt20	-0.0151292	6.16497	-0.0659242	0.947984	0.976407	-6.25823
Exosc8	-0.722937	6.21153	-1.10896	0.278421	0.51134	-5.65867
Alg5	-0.338199	4.75627	-0.864201	0.396021	0.614794	-5.89128
Rfxap	-1.12481	4.19482	-2.28756	0.0312601	0.178175	-3.89181
Spg20	-0.2339	2.44849	-0.765901	0.451192	0.657757	-5.9695
Wwtr1	0.0840478	2.51771	0.166656	0.869035	0.934405	-6.24648
Commd2	-0.338135	5.81781	-1.16646	0.254872	0.487318	-5.59645
Rnf13	-1.02781	5.43691	-2.31414	0.0295228	0.172731	-3.84187
Tsc22d2	-0.495383	4.80981	-1.2071	0.23914	0.471371	-5.55079
Serp1	-1.04715	6.90237	-2.11821	0.0446894	0.209556	-4.20126
Eif2a	0.00557982	5.53272	0.0120073	0.990519	0.995754	-6.26034
Selenot	-0.94173	5.79016	-2.2004	0.03763	0.192845	-4.053
Siah2	-0.66471	2.89775	-2.02252	0.0543856	0.231099	-4.36903
Med12l	-0.669612	3.06725	-1.55373	0.13332	0.348793	-5.10726
P2ry13	-1.09484	2.68657	-3.2787	0.00316842	0.0588238	-1.83174
P2ry12	-1.23672	2.62627	-4.60109	0.000114154	0.0107486	1.25854
Mbnl1	-0.23634	8.62366	-1.32748	0.19682	0.426711	-5.40752
P2ry1	-0.646941	2.63461	-1.89628	0.0700068	0.259644	-4.582
Rap2b	-0.729474	4.4251	-1.6542	0.111089	0.317712	-4.96162
Dhx36	-0.635381	6.03456	-1.43611	0.163861	0.388932	-5.26828
Slc33a1	-1.00356	3.40755	-2.6073	0.0154372	0.127494	-3.26863
Gmps	-0.405578	5.92923	-0.883428	0.385756	0.60698	-5.87495
Vmn2r7	-0.677055	2.20588	-3.43368	0.00216696	0.049809	-1.48195
Ssr3	0.0307047	6.91291	0.137278	0.891954	0.947337	-6.25095
Tiparp	-0.259867	5.79819	-0.908279	0.372749	0.594748	-5.85334
Ccnl1	-0.364743	6.92971	-1.98374	0.0588195	0.239634	-4.43549
Gm37305	-0.672389	2.55032	-2.298	0.0305674	0.176081	-3.87225
Rsrc1	-0.827369	6.01895	-1.77706	0.0882171	0.28754	-4.77386
Gfm1	-0.153228	4.13972	-0.331952	0.742803	0.855772	-6.20521
Lxn	-1.08078	3.68984	-2.59562	0.0158505	0.129307	-3.29221
Mfsd1	0.00465609	5.26807	0.0103559	0.991823	0.996092	-6.26036
Schip1	0.0694331	2.7785	0.170339	0.866169	0.932335	-6.24585
Il12a	-0.075352	2.40601	-0.224659	0.824143	0.907062	-6.2351
Ift80	0.0631375	4.52581	0.140944	0.889088	0.946002	-6.25044
Smc4	-0.649544	8.50772	-1.94393	0.0637007	0.248947	-4.50277
Trim59	-0.873088	5.35116	-2.14919	0.0418996	0.203833	-4.14582
Kpna4	-0.843246	6.56345	-1.74525	0.093715	0.294821	-4.82347
Ppm1l	-0.925993	3.03753	-2.73233	0.0116025	0.114074	-3.01279
Nmd3	-0.125946	4.35851	-0.315568	0.755055	0.864157	-6.21051
Pdcd10	-0.211856	7.51734	-0.958377	0.347415	0.574844	-5.80808
Serpini1	-0.166891	2.50932	-0.538025	0.595507	0.760134	-6.11595
Golim4	-1.08117	7.69225	-3.30422	0.00297714	0.0581268	-1.77451
Rapgef2	-1.18409	6.11099	-2.71628	0.0120391	0.11552	-3.04599
4921511C10Rik	-0.678975	2.32684	-2.78053	0.0103797	0.108145	-2.91254
Fnip2	0.12522	5.29641	0.437054	0.665974	0.807445	-6.16488
Ppid	-0.576803	5.48422	-1.0109	0.322134	0.552143	-5.75822
Etfdh	-0.0661935	3.79182	-0.153296	0.879444	0.940495	-6.24862
4930579G24Rik	-0.362035	3.71208	-0.879762	0.3877	0.608708	-5.87809
Ctso	-1.04889	2.49781	-4.96552	4.51913e-05	0.00669563	2.1257
Plrg1	0.14803	4.48898	0.358106	0.72339	0.844025	-6.19619
Tlr2	-0.766924	3.88613	-1.98772	0.0583506	0.238977	-4.42872
Tmem131l	-0.56488	7.33676	-2.10686	0.045752	0.212518	-4.22143
Mnd1	-0.221553	3.16702	-0.575421	0.570355	0.742996	-6.09532
Arfip1	-1.35487	2.78263	-3.84187	0.000783424	0.0318266	-0.539311
Gm37240	-0.346154	3.41653	-0.822201	0.419045	0.631545	-5.92579
Tmem154	-1.23624	6.04765	-3.64521	0.00128233	0.0408962	-0.996776
Fbxw7	0.200865	5.71869	0.666888	0.511196	0.70292	-6.03919
Gatb	0.506717	3.07805	1.1662	0.254977	0.487318	-5.59674
Sh3d19	0.30376	2.93859	0.716863	0.480367	0.679056	-6.00517
Rps3a1	-0.0310333	10.5938	-0.110187	0.913176	0.958659	-6.25432
Lrba	-1.01293	4.36314	-2.16846	0.0402442	0.199636	-4.11106
Cd1d1	-0.127844	2.9059	-0.387875	0.701522	0.829691	-6.18511
Etv3	-0.0146708	3.46308	-0.0313375	0.975259	0.988754	-6.25992
Arhgef11	-1.77851	3.44833	-5.08244	3.35992e-05	0.00559533	2.40304
Prcc	0.0421652	4.42245	0.102629	0.919109	0.960989	-6.25513
Hdgf	-0.205695	7.47045	-0.716121	0.480817	0.679056	-6.00569
Mrpl24	0.0319985	6.26221	0.147242	0.884169	0.943285	-6.24953
Rrnad1	-0.934203	3.53647	-2.12018	0.0445073	0.209049	-4.19775
Isg20l2	-0.4724	4.05821	-0.906379	0.373733	0.595784	-5.85501
Gpatch4	0.306878	3.59901	0.680663	0.50259	0.696601	-6.03005
Naxe	-0.300509	5.39266	-0.680492	0.502696	0.696653	-6.03016
Iqgap3	-0.472258	4.44233	-1.01503	0.3202	0.550274	-5.7542
Mef2d	-0.325911	3.8135	-0.731492	0.471551	0.672736	-5.99476
Cct3	0.379722	6.26502	1.06771	0.296258	0.529031	-5.70157
Glmp	0.210316	5.31123	0.725807	0.474966	0.675195	-5.99883
Tmem79	0.063395	2.58582	0.179813	0.858807	0.928471	-6.24419
Smg5	-0.627707	4.1147	-1.37255	0.182564	0.410561	-5.35087
Pmf1	-0.94874	5.40384	-1.76621	0.0900607	0.289892	-4.79086
Slc25a44	-0.339898	3.80114	-0.79321	0.435417	0.644647	-5.94867
Sema4a	-0.362572	6.40257	-1.49904	0.146885	0.368309	-5.18342
Lmna	-0.542711	3.96242	-1.02208	0.316921	0.548057	-5.7473
Lamtor2	-0.137533	8.32716	-0.417572	0.679967	0.816237	-6.17318
Ubqln4	-0.230167	3.43411	-0.550892	0.586792	0.75465	-6.109
Ssr2	0.31954	6.59609	1.03446	0.311218	0.543041	-5.73507
Arhgef2	-0.617513	5.7618	-1.37541	0.18169	0.4101	-5.34723
Khdc4	-0.451254	5.50541	-1.05413	0.302303	0.533492	-5.71536
Rit1	-0.689955	5.10179	-1.69207	0.103559	0.308553	-4.90487
Gon4l	-0.479235	5.21631	-1.14821	0.262182	0.494382	-5.6165
Msto1	0.58375	2.58886	1.38014	0.180246	0.408821	-5.34118
Dap3	-0.299382	5.96086	-0.632418	0.533084	0.718409	-6.06128
Ash1l	-0.917792	6.82825	-1.81548	0.0819479	0.278693	-4.71305
Rusc1	0.605603	3.61568	1.24408	0.225467	0.45798	-5.50804
Fdps	-0.356662	6.82744	-0.65143	0.52095	0.709422	-6.04924
Pklr	-0.564966	2.333	-2.30883	0.0298627	0.173668	-3.85187
Clk2	-0.729856	4.57074	-1.48335	0.150977	0.373493	-5.20486
Scamp3	0.202263	5.32761	0.435835	0.666846	0.8078	-6.16541
Fam189b	0.19689	2.76204	0.465774	0.64557	0.79563	-6.15198
Gba	-0.626447	3.53833	-1.32364	0.198077	0.428301	-5.41228
Mtx1	-0.391189	4.27489	-0.773096	0.447002	0.654311	-5.96408
Krtcap2	-1.0018	6.83647	-1.37476	0.181887	0.4101	-5.34805
Dpm3	-0.804166	6.0137	-1.25683	0.220892	0.454373	-5.49304
Slc50a1	0.161395	4.77163	0.468783	0.643449	0.794045	-6.15058
Adam15	-0.438405	3.84272	-1.02536	0.315403	0.546557	-5.74407
Zbtb7b	-1.12943	4.20224	-2.37989	0.0255984	0.160958	-3.71681
Gm15417	-0.676124	2.64234	-2.27392	0.0321879	0.180014	-3.91731
Flad1	-1.08832	3.12241	-3.19349	0.00389708	0.0637387	-2.02167
Cks1b	-0.157404	7.53795	-0.622728	0.539327	0.721766	-6.06729
Shc1	-0.369841	5.47582	-0.833114	0.412983	0.627194	-5.91698
Pygo2	-1.05276	3.7674	-2.2418	0.0344705	0.185916	-3.97694
Pbxip1	-1.13851	5.57914	-2.67065	0.0133662	0.12109	-3.1398
Pmvk	-0.561581	4.40184	-1.20763	0.238939	0.471342	-5.55018
Adar	-1.35424	4.34512	-2.79326	0.0100778	0.107002	-2.88593
Ube2q1	-0.113347	6.75064	-0.502322	0.620012	0.778202	-6.13439
Il6ra	-0.936012	4.97966	-2.14042	0.0426726	0.20508	-4.16156
Hax1	-0.423564	4.24849	-0.881872	0.386581	0.607992	-5.87628
Ubap2l	-0.0207832	6.31541	-0.105771	0.916642	0.959845	-6.2548
4933434E20Rik	0.5837	4.83631	2.17032	0.0400873	0.199348	-4.10769
Tpm3	-0.412345	9.23486	-2.24474	0.0342555	0.185123	-3.9715
Nup210l	-1.35965	3.51813	-3.08633	0.00504496	0.0736638	-2.25783
Rps27	0.10578	8.48447	0.347801	0.731017	0.847986	-6.19983
Rab13	-0.481603	3.63494	-1.21446	0.236372	0.468788	-5.54238
Jtb	0.110332	5.49942	0.485525	0.631701	0.786787	-6.14263
Slc39a1	-0.644987	2.98958	-1.63469	0.115146	0.324279	-4.99048
Crtc2	-0.227359	2.96632	-0.611321	0.546726	0.727068	-6.07424
Dennd4b	-0.95432	3.81005	-2.0405	0.0524322	0.227245	-4.33791
Gatad2b	-0.693843	5.82119	-2.12455	0.0441054	0.208327	-4.18996
Ints3	-0.993625	4.23105	-2.39741	0.0246369	0.158561	-3.68314
Ilf2	-1.07648	6.22916	-1.69815	0.102391	0.307294	-4.89565
Snapin	-0.649671	4.5369	-1.66606	0.108683	0.314897	-4.94395
Chtop	-0.604039	5.0841	-1.53457	0.13795	0.355006	-5.1342
S100a1	-0.492354	6.37282	-0.96857	0.342406	0.570394	-5.79859
S100a13	-0.36759	6.7603	-1.49017	0.149188	0.371036	-5.19557
S100a4	-0.0202844	3.28063	-0.0430986	0.965979	0.984347	-6.25948
S100a6	-1.71632	10.2039	-2.67889	0.0131166	0.120173	-3.1229
S100a8	-0.941189	15.4753	-2.45785	0.0215689	0.149842	-3.56582
S100a9	-0.985125	15.7814	-2.31	0.029788	0.173668	-3.84968
S100a11	-0.510005	10.7426	-2.05388	0.0510197	0.224204	-4.31464
S100a10	-0.537674	4.21696	-0.99793	0.328255	0.558266	-5.77076
Mrpl9	-0.269931	4.57469	-0.542324	0.592589	0.75833	-6.11365
Snx27	-0.571771	5.6495	-1.31124	0.202167	0.433275	-5.42754
Pogz	-0.528968	3.94211	-1.02978	0.313367	0.545092	-5.73971
Psmb4	-0.0260375	7.32289	-0.140616	0.889345	0.946002	-6.25049
Selenbp1	0.205725	4.12058	0.622426	0.539523	0.721871	-6.06747
Rfx5	-0.217515	2.44358	-0.697872	0.491954	0.689064	-6.01838
Pi4kb	-0.865087	4.07634	-2.1216	0.0443757	0.208723	-4.19521
Gm15265	-0.249773	2.51953	-0.82071	0.419877	0.632421	-5.92699
Zfp687	-0.39936	4.30302	-0.826143	0.416849	0.629365	-5.92262
Psmd4	0.0454034	7.14617	0.213055	0.833081	0.912354	-6.23764
Pip5k1a	-0.718609	4.49218	-1.54637	0.135081	0.350849	-5.11763
Vps72	-0.357166	4.86261	-0.695661	0.493313	0.689625	-6.01989
Scnm1	-1.02473	3.9543	-2.28174	0.0316526	0.178555	-3.90269
Lysmd1	-0.376859	2.27134	-1.39855	0.17472	0.401987	-5.31747
Tnfaip8l2	-0.972674	4.99037	-2.21718	0.0363192	0.189855	-4.02228
Gabpb2	-0.156862	5.60651	-0.644136	0.525587	0.712691	-6.0539
Gm16740	0.325439	2.70683	0.947178	0.352974	0.578334	-5.81839
Mllt11	-0.34097	2.48241	-1.03506	0.310945	0.542738	-5.73448
Cdc42se1	-0.398766	7.06819	-1.49155	0.148827	0.370504	-5.19368
Prune1	-0.271985	4.23976	-0.700946	0.490068	0.687953	-6.01626
Mindy1	-0.84672	5.55288	-1.9722	0.0601989	0.241438	-4.45509
6330562C20Rik	-0.211375	2.28625	-0.81988	0.420341	0.632741	-5.92765
Cers2	-0.467635	5.68666	-1.08321	0.289464	0.521989	-5.68563
Setdb1	0.183889	5.09112	0.638085	0.529452	0.715882	-6.05773
Arnt	-1.6268	4.5535	-3.3658	0.00256054	0.0546205	-1.63579
Ctss	-1.20743	4.02267	-2.40642	0.0241552	0.157462	-3.66575
Golph3l	-0.872328	4.07557	-1.87223	0.0733914	0.265024	-4.62144
Ensa	0.0129448	5.24752	0.0436782	0.965522	0.98418	-6.25946
Mcl1	-0.853804	7.65859	-2.59679	0.0158084	0.129289	-3.28984
Tars2	-0.726553	3.3204	-1.87838	0.0725126	0.263552	-4.61139
Rprd2	-0.854461	5.71283	-2.02496	0.0541167	0.230637	-4.36482
Prpf3	-0.584605	4.50705	-1.25487	0.221592	0.454698	-5.49536
Mrps21	-0.330209	6.89222	-1.38452	0.178918	0.407183	-5.33556
BC028528	-1.55567	4.82956	-3.39855	0.0023627	0.0515242	-1.5617
Aph1a	-0.380672	5.2899	-0.887455	0.383629	0.604827	-5.87148
Anp32e	-1.37948	7.39482	-1.78908	0.0862135	0.285051	-4.75495
Plekho1	-0.163475	2.79451	-0.463156	0.647419	0.796635	-6.15319
Vps45	-0.380285	3.66447	-0.824344	0.41785	0.63021	-5.92407
Otud7b	-0.522059	4.89586	-1.2671	0.217259	0.450851	-5.48086
Sf3b4	-0.403749	5.63014	-0.858597	0.399045	0.616811	-5.89598
Bola1	-0.225928	4.34087	-0.41774	0.679845	0.816237	-6.17311
Hist2h2ab	-0.349521	2.51636	-0.998657	0.327909	0.557867	-5.77006
Hist2h2ac	-1.74034	6.69876	-2.56723	0.0168984	0.13374	-3.34927
Hist2h2aa1	-0.386814	5.06462	-1.40357	0.173237	0.400129	-5.31096
Hist2h4	-0.704864	2.80832	-1.94159	0.0639984	0.249723	-4.5067
Hist2h2bb	-1.02969	4.70309	-1.98918	0.058179	0.23866	-4.42623
Fcgr1	-0.571461	2.6055	-1.77809	0.088044	0.287439	-4.77225
Txnip	-0.518048	6.92719	-1.49776	0.147215	0.368771	-5.18518
Polr3gl	-1.10885	4.15852	-2.30886	0.0298609	0.173668	-3.85182
Rbm8a	-0.0553315	7.36193	-0.218202	0.829113	0.909392	-6.23653
Pex11b	-0.430292	3.15043	-1.07383	0.293563	0.526085	-5.6953
Pias3	-0.993325	3.2875	-2.50202	0.0195549	0.144758	-3.47902
Polr3c	-0.371413	4.78011	-0.889419	0.382594	0.604364	-5.86979
Rnf115	-0.425728	6.3296	-1.88214	0.0719803	0.262754	-4.60524
Gpr89	-0.102018	3.81316	-0.235459	0.815847	0.901418	-6.23261
Acp6	-0.443377	3.21441	-0.957581	0.347808	0.574877	-5.80881
Bcl9	0.671295	3.66191	1.48293	0.151089	0.373493	-5.20543
Chd1l	-0.23368	4.30262	-0.460126	0.649562	0.797506	-6.15458
Fmo5	-0.819023	6.04931	-1.60722	0.121064	0.333349	-5.03062
Prkab2	-0.501463	2.18768	-2.34259	0.0277618	0.16756	-3.78803
Sec22b	-1.06268	5.61259	-1.91871	0.0669731	0.254402	-4.54488
Notch2	-1.01989	5.77401	-3.59796	0.00144254	0.043417	-1.10583
Phgdh	-0.0990201	4.86418	-0.171104	0.865575	0.931917	-6.24572
Wars2	-0.659068	2.70111	-2.20881	0.0369677	0.191294	-4.03762
Wdr3	-0.517727	4.56008	-1.22669	0.23182	0.464424	-5.52828
Gdap2	-0.735139	4.10646	-1.79532	0.0851883	0.283627	-4.74509
Tent5c	-1.36165	2.60716	-5.90926	4.23641e-06	0.00194008	4.33672
Man1a2	-0.225587	5.54861	-0.931463	0.360877	0.584683	-5.83267
Gm43462	-0.329702	2.69505	-1.02016	0.31781	0.548653	-5.74918
Trim45	-0.0386627	3.03166	-0.0967179	0.923752	0.964236	-6.25572
Ttf2	-0.135538	4.52633	-0.343214	0.734422	0.850103	-6.20141
Cd101	-0.954804	3.79858	-2.38171	0.0254966	0.160748	-3.71331
Atp1a1	-0.574853	4.62053	-1.19551	0.243552	0.47561	-5.56395
Slc22a15	-1.26836	6.15676	-2.87992	0.00823239	0.0968789	-2.70315
Tspan2	0.0412389	6.26312	0.180642	0.858163	0.928179	-6.24404
Sike1	-0.866565	4.31374	-2.03912	0.0525798	0.227552	-4.34031
Csde1	-0.772597	6.66163	-1.52064	0.141399	0.359928	-5.15361
Nras	-0.573372	5.16254	-1.37848	0.180752	0.409414	-5.3433
Dennd2c	-0.0103682	2.40911	-0.0340688	0.973104	0.987612	-6.25983
Bcas2	-0.343736	6.48388	-0.68659	0.498912	0.694178	-6.02606
Trim33	-0.936701	5.95088	-2.11266	0.0452063	0.210778	-4.21113
Hipk1	-0.446356	7.5715	-2.03429	0.0530992	0.228524	-4.34868
Gm43149	-0.559006	2.95186	-1.56226	0.131298	0.346506	-5.09517
Gm15886	-1.1636	2.55965	-4.79885	6.9015e-05	0.00818031	1.72944
Dclre1b	-0.43127	4.56538	-1.12419	0.272034	0.504815	-5.64246
Ap4b1	-0.73841	3.20553	-2.22618	0.0356331	0.188453	-4.00574
Bcl2l15	-0.861714	2.77609	-2.14674	0.0421141	0.204032	-4.15021
Ptpn22	-0.922817	5.24497	-2.33481	0.0282335	0.169187	-3.80279
Rsbn1	-0.430537	6.56099	-1.50769	0.144667	0.364578	-5.17153
Phtf1	-0.113915	4.78615	-0.273098	0.787111	0.885456	-6.22302
Magi3	-0.95871	6.04214	-2.06065	0.0503171	0.222833	-4.30281
Gm42702	-0.160235	2.47475	-0.470095	0.642524	0.793514	-6.14996
Gm43260	-0.590624	2.51761	-2.15361	0.0415146	0.202351	-4.13786
Lrig2	-0.0297226	4.36111	-0.0761337	0.939943	0.972871	-6.2575
Gm43696	0.241969	2.70338	0.562943	0.578688	0.749008	-6.10235
A530041M06Rik	0.217882	2.30926	0.731487	0.471554	0.672736	-5.99477
4930509H03Rik	-0.272559	2.85844	-0.871971	0.391852	0.612173	-5.88472
Slc16a1	0.376734	4.28981	0.863315	0.396498	0.615239	-5.89203
Rhoc	-1.2406	2.64764	-4.82251	6.49842e-05	0.00799294	1.78576
Mov10	-0.81115	3.76662	-1.78385	0.0870806	0.285868	-4.76319
Capza1	-0.544205	8.31093	-3.26438	0.0032809	0.0588238	-1.86378
Gm42658	-1.09613	2.33328	-5.55928	1.0113e-05	0.00268127	3.52538
Gm42659	-1.06699	2.63072	-3.48509	0.00190864	0.0471312	-1.36477
St7l	-0.220206	4.52347	-0.69891	0.491317	0.688585	-6.01766
Ddx20	-0.535633	3.4746	-1.37166	0.182838	0.410999	-5.35201
Gm43848	-0.519511	2.21911	-2.13799	0.0428896	0.205377	-4.16592
Rap1a	-0.943073	7.62835	-1.6746	0.106978	0.313342	-4.93117
Gm43328	-0.595846	2.44839	-2.29361	0.0308567	0.176969	-3.88047
Gm43329	0.00677701	2.4443	0.0177368	0.985995	0.993725	-6.26026
Adora3	-0.317255	2.32811	-0.971769	0.340844	0.569259	-5.7956
I830077J02Rik	-2.01367	4.50292	-3.74925	0.000988567	0.0353185	-0.75542
Atp5f1	-0.120552	8.40043	-0.796055	0.433793	0.643695	-5.94646
Wdr77	-0.122801	4.20014	-0.302091	0.765181	0.871758	-6.21468
Ovgp1	-0.565852	2.4268	-2.03552	0.0529672	0.228215	-4.34656
Chil5	-1.61094	2.92522	-4.66416	9.72217e-05	0.00969811	1.40877
Chil3	-1.20646	11.1586	-4.16951	0.000342196	0.0188395	0.232437
Dennd2d	-0.503435	4.80244	-1.22587	0.232125	0.46485	-5.52924
Cept1	-0.388178	6.19124	-1.54548	0.135297	0.351135	-5.11889
Dram2	-0.866836	4.87101	-2.25343	0.0336275	0.183769	-3.95541
Lrif1	-0.403037	5.11154	-0.916541	0.368489	0.59032	-5.84603
Cd53	-0.688316	7.47569	-3.00169	0.00617474	0.0812147	-2.44204
Lamtor5	0.0291096	6.38742	0.135654	0.893224	0.947986	-6.25118
Rbm15	-1.15404	3.98959	-2.24597	0.0341662	0.184967	-3.96923
Strip1	-0.422433	4.58674	-0.817678	0.421574	0.634053	-5.92941
Ahcyl1	0.154845	5.10165	0.351133	0.728548	0.846645	-6.19866
Csf1	0.189203	3.0352	0.394563	0.696645	0.827733	-6.1825
Gstm5	0.0416114	3.99145	0.088699	0.930056	0.967208	-6.25646
Gstm1	-0.836072	7.23701	-1.02146	0.317209	0.548272	-5.74791
Gstm4	-0.252398	3.09904	-0.608656	0.548462	0.728127	-6.07585
Ampd2	-0.487233	4.36367	-1.00151	0.326556	0.556164	-5.76731
Gnai3	-0.368678	7.57316	-2.24604	0.0341611	0.184967	-3.9691
Cyb561d1	-0.887573	2.31059	-3.89903	0.000678398	0.0294606	-0.405418
Psma5	0.0154655	7.19722	0.0532823	0.957947	0.980427	-6.25899
Sort1	-0.939098	6.85302	-1.81461	0.0820855	0.278925	-4.71444
Psrc1	-0.231571	2.69448	-0.582612	0.565581	0.739789	-6.09119
Sars	-0.394185	4.95615	-0.717473	0.479998	0.678999	-6.00474
Tmem167b	-0.83102	3.65617	-1.91298	0.0677366	0.255678	-4.55439
Taf13	-0.980797	4.61451	-2.35782	0.0268589	0.165523	-3.75903
Wdr47	-0.666985	2.56304	-2.16939	0.0401662	0.19938	-4.10939
Clcc1	-0.00882384	4.60545	-0.0208495	0.983538	0.992569	-6.2602
Gpsm2	-1.09276	3.77908	-2.46737	0.0211192	0.148276	-3.54719
Stxbp3	-0.25913	5.43956	-0.742067	0.465238	0.667159	-5.98712
Prpf38b	-0.568742	6.44147	-1.15877	0.257935	0.490042	-5.60494
Fam102b	0.541622	4.32416	1.70959	0.100224	0.30421	-4.87827
Slc25a24	-0.620755	6.40544	-2.06633	0.0497354	0.221817	-4.29288
Vav3	-0.32549	7.8133	-1.45661	0.158164	0.382359	-5.24096
Prmt6	-0.0765938	2.41106	-0.234422	0.816643	0.901861	-6.23285
Amy1	-0.0915347	2.20605	-0.286188	0.777186	0.8792	-6.21936
Rnpc3	-0.389525	4.67867	-0.937431	0.357862	0.581901	-5.82727
A930005H10Rik	-0.290731	3.07287	-0.800008	0.431543	0.641991	-5.94337
Dph5	0.246201	3.82384	0.528151	0.602238	0.765042	-6.12117
Slc30a7	-0.567214	4.98643	-1.37752	0.181044	0.4098	-5.34453
Extl2	-0.713978	3.36852	-1.65386	0.11116	0.317712	-4.96213
Vcam1	0.582571	4.49663	1.30768	0.203354	0.434527	-5.43191
Cdc14a	-0.204406	6.41956	-1.02242	0.316761	0.547968	-5.74696
Rtca	-0.410622	4.1346	-0.758869	0.455309	0.661399	-5.97475
Dbt	0.38461	2.87275	0.843063	0.407505	0.623038	-5.90885
Trmt13	-0.554488	3.80726	-1.37487	0.181855	0.4101	-5.34792
Sass6	-0.628631	5.85732	-1.3933	0.176283	0.403295	-5.32426
Mfsd14a	-1.01968	5.02719	-2.62493	0.0148325	0.126203	-3.23294
Slc35a3	-1.16376	4.77657	-2.10482	0.0459457	0.213123	-4.22505
Agl	-0.373904	5.93185	-1.46163	0.156794	0.38065	-5.23422
Frrs1	-0.0549252	5.92234	-0.225599	0.82342	0.906761	-6.23488
Snx7	0.549964	2.43756	1.37474	0.181894	0.4101	-5.34809
Ptbp2	-1.51007	5.35376	-3.41646	0.00226084	0.0505055	-1.52107
Tmem56	-0.768033	2.54551	-2.60353	0.0155694	0.12805	-3.27624
Alg14	-0.635963	3.45672	-1.52293	0.140825	0.359194	-5.15042
F3	-0.343409	2.17871	-1.48506	0.150527	0.373061	-5.20253
Abcd3	-0.23154	4.83572	-0.445961	0.659617	0.803089	-6.16097
Gclm	-0.094626	7.08254	-0.497484	0.623369	0.779791	-6.13679
Dnttip2	-0.377933	5.48476	-0.870771	0.392494	0.612603	-5.88574
Bcar3	-0.412436	3.30854	-0.952854	0.350149	0.576629	-5.81318
Fnbp1l	-1.31816	3.62155	-3.19913	0.00384419	0.0631815	-2.00915
Pde5a	0.105217	2.60167	0.294141	0.771176	0.875729	-6.21705
1810037I17Rik	-0.607826	8.08574	-2.22514	0.0357122	0.188476	-4.00767
Usp53	-0.981315	3.79178	-2.05074	0.0513481	0.224684	-4.32011
Sec24d	-0.589956	3.3207	-1.27317	0.215134	0.44885	-5.47362
Mettl14	-0.428113	3.85684	-0.85951	0.398551	0.616719	-5.89522
Snhg8	-0.600472	5.14088	-1.07361	0.293657	0.526105	-5.69552
Ugt8a	-0.928307	2.78522	-2.45848	0.021539	0.149842	-3.56459
Camk2d	0.131088	4.85077	0.273874	0.786522	0.885089	-6.22281
Larp7	-0.313161	5.31624	-0.7599	0.454704	0.661273	-5.97399
Zgrf1	-0.656089	4.5713	-1.36015	0.186405	0.414395	-5.36663
Alpk1	-0.117608	4.7143	-0.292713	0.772253	0.876177	-6.21747
Tifa	-1.17347	3.59699	-2.80339	0.00984343	0.105279	-2.86471
Ap1ar	-0.357956	4.32468	-0.744118	0.464019	0.666441	-5.98562
Fam241a	-0.404176	6.8068	-2.30497	0.0301124	0.174759	-3.85915
Elovl6	-0.381811	2.57141	-1.03266	0.312045	0.543921	-5.73686
Gar1	-0.241864	4.99376	-0.43638	0.666456	0.807615	-6.16518
Pla2g12a	-0.00247444	4.68485	-0.00572841	0.995477	0.997457	-6.2604
Casp6	-1.36665	2.64954	-5.66416	7.78297e-06	0.00241191	3.7698
Sec24b	-0.268811	5.27516	-0.943386	0.35487	0.579463	-5.82186
Ostc	0.155722	7.49008	0.638194	0.529382	0.715882	-6.05766
Rpl34	0.0495953	10.0933	0.192	0.849355	0.922282	-6.24192
Hadh	-0.334555	3.56428	-0.683691	0.500709	0.695301	-6.02802
Sgms2	-0.143655	7.33638	-0.547061	0.589381	0.756304	-6.11109
Papss1	-0.456066	3.7243	-0.989836	0.332115	0.562211	-5.77851
Aimp1	-0.823407	5.68529	-1.39683	0.175229	0.402382	-5.31969
Tbck	-0.0939625	4.9921	-0.317134	0.75388	0.8635	-6.21002
Gstcd	-0.469487	4.61532	-0.946607	0.35326	0.578432	-5.81891
Ints12	-0.906946	5.34929	-2.26636	0.0327123	0.181086	-3.93139
Ppa2	-0.15513	4.67518	-0.302942	0.764541	0.871647	-6.21442
Tet2	-1.00833	5.60833	-3.51788	0.00175987	0.0458174	-1.28979
Cenpe	-1.03761	7.06186	-1.99322	0.0577071	0.237888	-4.41933
Cisd2	-0.794134	6.21265	-1.72647	0.0970969	0.299664	-4.85244
Ube2d3	-0.660135	8.18142	-4.08349	0.000425598	0.0218054	0.0289461
Manba	0.266475	3.89826	0.575564	0.57026	0.742996	-6.09523
Nfkb1	-0.394411	6.67208	-1.60138	0.122355	0.335254	-5.03909
Slc39a8	-0.424132	2.89545	-1.23611	0.228361	0.460562	-5.51734
Bank1	-1.82722	4.57589	-4.39756	0.000191655	0.0137923	0.773951
Ppp3ca	-0.585399	8.78867	-2.5773	0.0165194	0.13188	-3.32906
H2afz	-0.598361	11.3599	-2.17921	0.0393472	0.197323	-4.09159
Dnajb14	-1.17164	5.24041	-2.9344	0.00724185	0.090189	-2.58693
Lamtor3	-0.352783	5.42599	-0.840463	0.408932	0.624241	-5.91099
Dapp1	-0.319006	6.15745	-1.42805	0.166143	0.391371	-5.27892
Trmt10a	0.339732	3.08386	0.759474	0.454954	0.661328	-5.9743
Adh5	-0.672564	5.07515	-1.24456	0.225293	0.457719	-5.50748
Metap1	-0.821608	4.36713	-1.86636	0.0742389	0.267127	-4.63102
Eif4e	-0.302891	6.17024	-0.627968	0.535946	0.719963	-6.06405
Tspan5	-0.825724	6.7758	-1.59844	0.12301	0.336398	-5.04335
Rap1gds1	-0.482912	6.83467	-1.81541	0.0819592	0.278693	-4.71317
Pdlim5	-1.10935	5.64615	-3.49778	0.00184969	0.0469412	-1.33579
Gbp5	-0.385253	2.60641	-0.971622	0.340916	0.569259	-5.79574
Gbp7	-1.03599	3.9005	-2.36413	0.026493	0.164174	-3.74699
Gbp2	-1.46053	2.57727	-5.30845	1.89836e-05	0.00398457	2.93701
Kyat3	0.407968	2.74353	0.911667	0.370998	0.592831	-5.85035
Gtf2b	-0.462352	6.42315	-2.02013	0.0546501	0.231549	-4.37316
Pkn2	0.00748257	6.49275	0.033161	0.97382	0.987841	-6.25986
Lmo4	-0.443693	7.58229	-1.83036	0.0796247	0.275679	-4.68923
Hs2st1	0.269465	4.25357	0.665876	0.511831	0.703314	-6.03986
Selenof	-0.229229	7.5607	-1.11501	0.275871	0.508862	-5.65226
Sh3glb1	-0.952269	6.86246	-2.55655	0.0173091	0.135185	-3.37065
Odf2l	-0.269683	3.83913	-0.630176	0.534525	0.719388	-6.06268
Znhit6	0.582976	3.62314	1.15186	0.260707	0.493102	-5.61251
Bcl10	-0.225886	6.32513	-0.773631	0.446692	0.654131	-5.96367
2410004B18Rik	0.00601963	4.55313	0.0186008	0.985313	0.993299	-6.26024
Ssx2ip	-0.372768	3.991	-0.822439	0.418912	0.631439	-5.9256
Ctbs	-0.819177	4.02126	-2.0292	0.0536523	0.230115	-4.35749
Spata1	-0.917699	3.05338	-2.78184	0.0103482	0.10804	-2.9098
Gng5	-0.215248	9.48386	-1.11588	0.275505	0.508306	-5.65133
Rpf1	-0.316639	5.04804	-1.02955	0.31347	0.545112	-5.73993
Prkacb	-0.203973	4.99915	-0.470897	0.64196	0.793199	-6.14959
Adgrl4	-0.470159	2.88565	-1.32957	0.196143	0.426077	-5.40494
Dnajb4	-0.643664	4.02855	-1.25512	0.221502	0.454698	-5.49506
Fubp1	-0.607663	6.09283	-0.919084	0.367184	0.589814	-5.84377
Miga1	0.277917	2.91056	0.746521	0.462593	0.665921	-5.98387
Usp33	-1.02941	5.09979	-1.96147	0.061508	0.244166	-4.47325
Zzz3	-0.34866	5.20362	-0.833236	0.412916	0.627186	-5.91688
Pigk	0.403015	5.39475	1.45812	0.157752	0.381934	-5.23894
St6galnac3	-0.378513	3.48099	-1.01259	0.321342	0.551249	-5.75658
Asb17os	-0.79366	2.36246	-3.57204	0.00153859	0.0442893	-1.1655
Rabggtb	0.347523	4.96012	0.765185	0.45161	0.658176	-5.97004
Acadm	-0.586574	4.97759	-1.12188	0.272997	0.505556	-5.64494
Tyw3	-0.0836369	2.47377	-0.243801	0.809454	0.898757	-6.2306
Zranb2	-0.150931	6.12828	-0.554814	0.584149	0.75246	-6.10685
Ptger3	-0.0580498	2.66234	-0.146566	0.884697	0.943409	-6.24963
Ankrd13c	-0.556909	4.98695	-1.2913	0.208883	0.441669	-5.45183
Srsf11	-0.146258	7.33348	-0.582271	0.565807	0.739789	-6.09139
Lrrc40	-0.751749	3.61689	-1.59606	0.123541	0.336763	-5.04679
Depdc1a	-0.928798	5.25808	-2.24827	0.0339993	0.184759	-3.96497
Wls	-0.397385	6.67467	-1.57083	0.129296	0.344773	-5.08299
Tmem68	-0.275533	3.80555	-0.664519	0.512684	0.703963	-6.04075
Tgs1	-0.644449	5.2211	-1.20515	0.239876	0.471684	-5.553
Lyn	-0.645668	8.2821	-3.10056	0.00487564	0.0718184	-2.22665
Rps20	-0.189948	10.4876	-0.498322	0.622786	0.77945	-6.13637
Plag1	1.14309	2.93199	2.8097	0.00969986	0.1046	-2.85145
Chchd7	0.834012	4.94902	1.80963	0.0828775	0.279823	-4.72238
Gm11808	-0.022021	4.37749	-0.0551097	0.956507	0.979827	-6.25889
A830012C17Rik	-1.22385	2.74403	-3.91848	0.000645919	0.0291258	-0.359757
Impad1	-0.629238	4.33579	-1.38845	0.177736	0.405502	-5.33052
Ubxn2b	-0.352257	3.21276	-0.813739	0.423783	0.635927	-5.93255
Sdcbp	-0.313798	7.41963	-1.46961	0.154637	0.377689	-5.22348
Nsmaf	-0.589762	3.51192	-1.36398	0.185212	0.413693	-5.36177
Tox	0.0281083	2.47258	0.0705788	0.944317	0.974994	-6.25791
Rab2a	-0.444877	8.57449	-2.71123	0.0121797	0.116123	-3.05641
Chd7	-0.217726	7.20594	-0.834819	0.412041	0.626375	-5.9156
Asph	-0.834821	3.09006	-2.30416	0.0301646	0.174957	-3.86066
2610301B20Rik	-0.502074	2.78697	-1.26865	0.216717	0.450563	-5.47902
Plekhf2	-0.538888	5.4838	-1.27314	0.215146	0.44885	-5.47366
Ndufaf6	0.101431	3.88885	0.219961	0.827759	0.9087	-6.23614
Trp53inp1	-2.21805	4.18042	-4.71143	8.62027e-05	0.00914202	1.52133
Ccne2	-0.551063	5.75225	-1.18173	0.248873	0.480556	-5.57945
Ints8	-0.113848	5.01495	-0.355593	0.725248	0.845079	-6.19709
Dpy19l4	-0.352907	4.63705	-0.849876	0.403781	0.620988	-5.90323
Virma	-0.157037	5.60829	-0.336923	0.739099	0.853459	-6.20355
Rad54b	-0.158244	4.44299	-0.416446	0.680779	0.816725	-6.17365
Pdp1	-0.618074	2.37013	-2.09478	0.0469087	0.215744	-4.24283
Tmem67	-0.864118	2.25687	-4.03401	0.00048241	0.0233667	-0.0878769
Rbm12b2	0.495112	2.51347	1.44633	0.161001	0.386154	-5.2547
Fam92a	-0.36888	3.47196	-0.821681	0.419335	0.631802	-5.92621
Otud6b	-0.120746	4.00515	-0.253647	0.801925	0.893747	-6.22815
Pip4p2	-0.591466	4.16803	-1.31297	0.20159	0.432582	-5.42541
Tmem64	-0.719668	2.25507	-3.09566	0.00493335	0.0724541	-2.2374
Decr1	0.249574	3.56446	0.566336	0.576416	0.747315	-6.10045
Nbn	-0.222069	4.58524	-0.547079	0.589369	0.756304	-6.11108
Osgin2	-0.130492	3.12519	-0.322299	0.750013	0.860812	-6.20837
Ripk2	0.0132521	3.55822	0.0333636	0.97366	0.987841	-6.25986
Cpne3	-1.00978	8.31479	-4.10554	0.000402477	0.021055	0.0810422
Rmdn1	-0.742071	5.20776	-1.39884	0.174634	0.401881	-5.3171
Gm12353	-0.843768	2.92134	-2.46063	0.0214366	0.14966	-3.56038
Wwp1	-1.07056	5.29111	-2.51502	0.0189961	0.141977	-3.4533
Ggh	-0.960004	4.93589	-2.49827	0.0197185	0.145326	-3.48641
Ccnc	-0.703535	4.4653	-1.53078	0.13888	0.356305	-5.13948
Tstd3	-0.36442	2.81479	-1.00256	0.326059	0.555563	-5.7663
Usp45	-1.16893	3.89958	-2.71883	0.0119688	0.115387	-3.04072
Pnisr	-0.199615	6.27106	-0.946055	0.353535	0.578601	-5.81942
Coq3	0.207202	3.11999	0.529192	0.601526	0.764523	-6.12063
Fbxl4	-0.733483	2.52986	-2.46133	0.0214033	0.149567	-3.55901
Mms22l	-0.0631823	5.90392	-0.240879	0.811692	0.899455	-6.23131
Ndufaf4	-0.389985	3.86755	-0.76136	0.453848	0.66033	-5.9729
Ufl1	0.537053	5.14024	1.89562	0.0700975	0.259644	-4.58309
Manea	-1.9733	3.75503	-4.88582	5.53273e-05	0.00753274	1.93632
Map3k7	-1.28704	4.7064	-2.71477	0.0120809	0.11552	-3.04909
Bach2	0.491453	2.57782	1.23908	0.227282	0.459904	-5.51389
Casp8ap2	-0.0946068	6.35622	-0.338417	0.737988	0.852887	-6.20304
Mdn1	-0.148393	4.72919	-0.3657	0.717788	0.840321	-6.19345
Lyrm2	-0.550676	5.33727	-1.87875	0.0724607	0.263458	-4.6108
4933421O10Rik	-0.105386	2.96235	-0.250606	0.804249	0.895239	-6.22892
Ube2j1	-0.582509	5.43984	-1.4184	0.168911	0.394479	-5.29161
Pnrc1	-0.349029	6.8895	-1.23388	0.229177	0.461515	-5.51994
Rngtt	-0.600604	5.79344	-1.40544	0.172685	0.399404	-5.30853
Akirin2	-0.647665	5.94418	-1.48135	0.151505	0.373571	-5.20758
Orc3	-0.109914	5.44868	-0.236093	0.815361	0.901236	-6.23246
Rars2	0.204885	4.23025	0.419281	0.678734	0.81547	-6.17247
Slc35a1	-0.677182	3.02014	-1.83723	0.0785718	0.273914	-4.67819
Smim8	-0.429211	3.99904	-0.859431	0.398594	0.616719	-5.89528
Zfp292	-0.256219	6.31748	-0.922578	0.365397	0.588454	-5.84065
Mob3b	-0.19596	3.12517	-0.479331	0.636035	0.789042	-6.1456
C9orf72	-0.295162	2.57786	-0.758832	0.455331	0.661399	-5.97478
Aco1	0.169624	3.43866	0.376014	0.710205	0.835902	-6.18963
Ddx58	-1.01684	5.29383	-2.37091	0.0261044	0.162548	-3.73401
Topors	-0.273952	5.13424	-0.65212	0.520512	0.709245	-6.04879
Smim27	-0.735934	3.47209	-1.85305	0.0761925	0.271008	-4.65264
Ndufb6	-0.408389	6.40045	-0.80381	0.429386	0.640197	-5.94039
Aptx	-0.638717	3.79433	-1.37471	0.181903	0.4101	-5.34812
Dnaja1	0.0931918	7.87621	0.476609	0.637945	0.790468	-6.1469
Smu1	0.239058	6.07089	1.06077	0.29934	0.531668	-5.70864
B4galt1	-0.308982	6.89175	-1.76243	0.0907119	0.291171	-4.79678
Bag1	0.002076	6.78817	0.00722791	0.994293	0.997148	-6.26039
Chmp5	-0.228206	6.4132	-1.07157	0.294557	0.527022	-5.69762
Nfx1	-0.0583344	5.38906	-0.1366	0.892485	0.947632	-6.25105
Nol6	-0.521553	2.91043	-1.23611	0.228361	0.460562	-5.51734
Ube2r2	0.270768	6.6881	1.43253	0.164871	0.389832	-5.27301
Ubap2	-0.18582	5.49181	-0.381231	0.706381	0.832719	-6.18766
Dcaf12	-0.763042	5.91485	-2.66868	0.0134263	0.12121	-3.14382
Ubap1	-0.329345	4.68874	-0.783001	0.441274	0.649122	-5.95654
Kif24	0.101016	4.79516	0.242082	0.81077	0.899318	-6.23102
Nudt2	-0.25158	3.85461	-0.577552	0.568938	0.742058	-6.0941
Fam219a	-1.16377	3.35679	-2.72717	0.0117413	0.1148	-3.02348
Il11ra1	0.182395	3.22739	0.370434	0.714303	0.838472	-6.19171
Rpp25l	-0.118228	4.44706	-0.359284	0.72252	0.843498	-6.19577
Dctn3	-0.189382	6.62631	-0.905668	0.374102	0.59609	-5.85563
Sigmar1	-0.65387	2.83042	-1.91095	0.0680093	0.255915	-4.55776
Galt	0.372721	3.93637	0.763912	0.452354	0.658974	-5.97099
Ccl27a	0.51028	2.52225	1.4452	0.161315	0.386192	-5.25621
Vcp	-0.233313	6.98688	-0.915438	0.369056	0.590571	-5.84701
Fancg	-0.407955	3.64176	-0.880164	0.387487	0.608658	-5.87774
Pigo	-0.304121	2.7786	-0.960021	0.346604	0.574253	-5.80655
Stoml2	-0.387074	5.8073	-0.817689	0.421567	0.634053	-5.9294
Fam214b	-0.994819	3.2342	-2.17893	0.0393702	0.19733	-4.0921
Ccdc107	-0.0522056	3.40162	-0.139135	0.890503	0.946294	-6.2507
Arhgef39	-0.789159	4.53798	-1.67511	0.106876	0.313342	-4.9304
Gm12454	-0.829246	2.35732	-3.69579	0.00113015	0.0378973	-0.879641
Car9	-0.158752	2.26085	-0.541464	0.593172	0.758498	-6.11411
Tln1	-0.720017	8.84638	-4.02327	0.000495691	0.0237814	-0.113191
Creb3	-0.392935	3.8794	-0.901252	0.376397	0.597671	-5.8595
Gba2	-0.568421	3.50501	-1.35414	0.188286	0.416256	-5.37421
Rgp1	-1.0622	3.36551	-2.57809	0.0164902	0.131856	-3.32749
Hint2	-0.479331	3.99765	-1.12264	0.272679	0.505378	-5.64412
Reck	-1.4138	3.88274	-3.02736	0.00580873	0.0780306	-2.3864
Glipr2	-0.551639	7.03181	-1.78476	0.0869285	0.285557	-4.76175
Clta	-0.0979883	8.52877	-0.515725	0.610759	0.771506	-6.12761
Gne	0.10852	3.83815	0.242222	0.810663	0.899299	-6.23099
Rnf38	-0.316817	5.93941	-1.08832	0.287248	0.519479	-5.68032
Melk	-0.591247	4.48185	-1.24784	0.224111	0.456883	-5.50363
Zcchc7	-0.532504	6.39113	-1.09748	0.283307	0.515779	-5.67076
Grhpr	-0.0505412	3.29897	-0.122514	0.903511	0.95408	-6.25288
Zbtb5	-0.892965	2.69194	-2.67238	0.0133133	0.120889	-3.13625
Polr1e	-0.0793503	3.32279	-0.189951	0.850943	0.9233	-6.24231
Fbxo10	-1.36508	3.82357	-2.79658	0.0100002	0.106521	-2.87896
Tomm5	-0.377721	6.25767	-0.7161	0.48083	0.679056	-6.00571
Trmt10b	-0.339089	3.33183	-0.871503	0.392102	0.612252	-5.88512
Exosc3	-0.341274	5.63483	-0.768236	0.44983	0.656916	-5.96775
Dcaf10	-1.01886	4.65264	-2.21635	0.0363832	0.190026	-4.02381
Slc25a51	-0.159333	4.42099	-0.39268	0.698017	0.828408	-6.18324
Ccdc180	-1.51136	2.59558	-4.91842	5.09305e-05	0.00721048	2.01381
Tdrd7	-0.676109	4.39789	-1.20499	0.239939	0.471684	-5.55319
Tmod1	-0.59213	2.52322	-1.81266	0.0823956	0.279455	-4.71756
Tstd2	-0.911494	4.16958	-1.86329	0.0746863	0.267905	-4.63602
Ncbp1	-0.107654	6.3534	-0.57516	0.570529	0.74303	-6.09546
Xpa	-0.623125	4.40675	-1.50271	0.14594	0.366669	-5.17838
Trmo	-0.748028	2.57949	-2.38349	0.0253978	0.160227	-3.7099
Hemgn	-0.695039	4.46881	-1.74911	0.0930332	0.294289	-4.81749
Anp32b	-0.381863	9.37772	-1.25392	0.221929	0.454812	-5.49647
Nans	0.148878	5.41271	0.317203	0.753828	0.8635	-6.21
Trim14	-0.78055	4.07825	-1.8361	0.0787445	0.273994	-4.68001
[truncated: 8,076 more rows]

## Sheet: DGE_Hdac3_erythroid
gene	logFC	AveExpr	t	P.Value	adj.P.Val	B
Xkr4	0.0795882	-1.01303	0.152987	0.8804	0.9151	-6.29332
Mrpl15	0.237328	7.50188	1.49785	0.15444	0.256638	-5.22913
Lypla1	0.247659	4.0397	1.21992	0.240895	0.350339	-5.57477
Tcea1	-0.306421	7.80053	-2.22204	0.0416969	0.112326	-4.11089
Atp6v1h	0.30444	4.71223	1.46125	0.164103	0.267418	-5.27773
Rb1cc1	-0.215205	5.85091	-1.11083	0.283731	0.394778	-5.69475
4732440D04Rik	0.141491	2.04533	0.290543	0.775287	0.834098	-6.26201
St18	-0.512078	-1.48633	-1.57194	0.136335	0.23575	-5.12806
Pcmtd1	-0.0243681	4.65498	-0.124663	0.902407	0.932807	-6.29737
Gm26901	0.835495	1.55068	1.65216	0.118793	0.215367	-5.01474
Sntg1	-0.897224	1.04666	-1.47518	0.160369	0.263215	-5.25934
Rrs1	1.05927	6.08302	3.61982	0.00243733	0.0257996	-1.48468
Adhfe1	-1.63227	-0.624644	-3.6956	0.00208307	0.0239549	-1.33628
2610203C22Rik	0.120348	-1.5744	0.399445	0.695065	0.772752	-6.22361
Mybl1	-1.89921	1.47482	-3.52076	0.00299316	0.0285711	-1.67855
Vcpip1	-0.965065	5.34029	-3.48792	0.00320408	0.0295254	-1.74274
1700034P13Rik	-2.27448	3.54809	-2.7755	0.0139023	0.0617275	-3.11342
Sgk3	-2.05939	6.75152	-4.48746	0.000410496	0.013314	0.203511
Mcmdc2	-2.71353	2.40113	-4.21545	0.000713728	0.0160304	-0.321396
Snhg6	-2.35118	5.01451	-2.15366	0.0475362	0.121786	-4.22722
Ppp1r42	-0.320041	-0.307209	-0.646004	0.527811	0.629009	-6.09335
Cops5	-0.0733363	6.82996	-0.553715	0.587745	0.681556	-6.14903
Cspp1	-0.0369492	6.10066	-0.270953	0.790035	0.845057	-6.26764
Arfgef1	-0.531785	6.24969	-1.73418	0.102905	0.195809	-4.8949
Cpa6	-1.01887	-0.483221	-2.75441	0.0145104	0.0630115	-3.15289
Slco5a1	-0.457751	-1.52812	-1.60527	0.128795	0.22722	-5.08146
Ncoa2	-2.43063	5.17661	-2.24945	0.0395496	0.109158	-4.06376
Gm29570	-1.01734	-1.09767	-2.95948	0.00954892	0.0502315	-2.76558
Tram1	-0.199007	6.84508	-1.54122	0.143612	0.244091	-5.1704
Lactb2	-0.186041	5.11759	-1.05332	0.308485	0.420419	-5.75418
Xkr9	-0.278242	-1.66621	-1.03293	0.317629	0.429563	-5.77459
Eya1	-1.00403	-1.10791	-3.23008	0.00546701	0.0377502	-2.24497
Terf1	-0.337972	6.79334	-1.73429	0.102886	0.195809	-4.89475
4930444P10Rik	-0.527947	-1.47413	-2.03638	0.0593346	0.13961	-4.42225
Rpl7	-0.134717	11.5223	-0.791572	0.440664	0.548268	-5.98921
Rdh10	0.34269	3.73823	1.40607	0.179612	0.284313	-5.34931
Stau2	-0.16086	0.0823293	-0.264319	0.795048	0.848959	-6.26946
Ube2w	-2.15073	4.03259	-2.39824	0.0295876	0.0920565	-3.80325
Eloc	0.000530809	7.96726	0.00334523	0.997374	0.998201	-6.30536
Tmem70	0.614704	5.40589	2.98225	0.00911293	0.0490959	-2.72213
Ly96	-0.588406	0.763628	-0.954209	0.354755	0.466533	-5.85014
Gm28153	-0.482098	-1.11098	-1.34659	0.197648	0.304382	-5.42408
Il17f	-0.427481	-1.15299	-0.916749	0.373445	0.484369	-5.88423
Mcm3	-0.584162	8.21871	-3.09761	0.00718744	0.0437295	-2.50092
Paqr8	0.483569	-0.712508	0.63443	0.535136	0.635592	-6.10078
Tram2	-0.411767	-0.236651	-0.745185	0.467411	0.573631	-6.02453
Tmem14a	-2.00696	0.629269	-3.82508	0.00159338	0.022088	-1.08275
Kcnq5	1.16386	4.49097	1.98166	0.0657071	0.147866	-4.51117
Gm29107	-1.19373	-0.961982	-3.42159	0.00367664	0.0315344	-1.87231
Ogfrl1	-0.36564	4.8793	-0.997769	0.333852	0.445806	-5.80898
B3gat2	-2.13067	-0.241263	-5.26218	8.8529e-05	0.00849108	1.6564
Smap1	-0.870531	7.97711	-3.40084	0.00383822	0.032086	-1.91279
Sdhaf4	-0.227424	5.69197	-0.890957	0.386696	0.496855	-5.907
Fam135a	-0.145986	-1.15467	-0.36194	0.722328	0.793729	-6.23818
Lmbrd1	-1.88334	3.4158	-2.3044	0.0355515	0.103073	-3.96844
Phf3	-0.194952	6.84858	-1.5973	0.130565	0.229277	-5.09267
Ptp4a1	-1.95208	-0.378637	-5.58572	4.76628e-05	0.00799838	2.23997
Ptp4a1-1	-1.15991	-0.988001	-3.31632	0.00457308	0.0347687	-2.07746
Prim2	-0.676815	7.41737	-3.59688	0.00255604	0.0264547	-1.52959
Rab23	-1.76046	2.53448	-2.49727	0.0243252	0.0827155	-3.62586
Bag2	0.456671	6.25842	2.92788	0.0101879	0.051799	-2.82574
Zfp451	-0.334363	5.0798	-1.79535	0.0922967	0.182952	-4.80305
Dst	-0.0221792	0.437787	-0.0320904	0.974813	0.98277	-6.30484
Gm37233	-0.153417	-1.36381	-0.430415	0.672872	0.754246	-6.21053
Ccdc115	0.450194	5.19196	2.93427	0.0100554	0.051532	-2.81359
Imp4	0.713271	5.75771	3.47843	0.00326777	0.0299093	-1.76129
Ptpn18	-1.74795	3.01253	-2.14656	0.0481836	0.122893	-4.23918
Gm28417	-0.642427	-0.98765	-1.59681	0.130674	0.229307	-5.09335
4930568A12Rik	-1.08682	-1.04422	-2.93447	0.0100511	0.051528	-2.81319
Arhgef4	-0.977538	-0.729872	-2.31002	0.0351649	0.102261	-3.95864
Gm38336	-0.875783	-1.20656	-4.38189	0.000508411	0.0142442	0.000501944
Fam168b	-0.396651	5.35028	-2.30043	0.0358271	0.10341	-3.97536
Plekhb2	-1.73063	2.33734	-2.53353	0.0226314	0.0793684	-3.5602
Hs6st1	-1.16057	5.8669	-5.28124	8.53269e-05	0.00843653	1.69119
Gm37335	-0.0563742	-1.43846	-0.164108	0.871786	0.908823	-6.29151
Gm33280	-0.0935339	3.06324	-0.288307	0.776966	0.835358	-6.26267
Uggt1	-0.380536	5.28844	-2.19648	0.0437972	0.115703	-4.15459
Neurl3	-0.704489	-0.0114798	-1.31785	0.206871	0.314143	-5.4593
Arid5a	-0.342629	0.189576	-0.511274	0.61643	0.706101	-6.17188
4930403P22Rik	-0.0346911	-1.45514	-0.11402	0.910699	0.938746	-6.29868
Kansl3	-1.00081	4.08296	-4.59542	0.000330188	0.012548	0.410066
Lman2l	-1.48306	2.43631	-2.02695	0.0603914	0.140944	-4.43768
Cnnm4	0.290248	1.6651	0.609073	0.551379	0.649964	-6.11661
Cnnm3	0.0829564	3.01887	0.289297	0.776222	0.834843	-6.26238
Ankrd23	1.56085	0.0436364	2.41904	0.0283995	0.0900726	-3.76622
Ankrd39	-1.37368	2.55751	-1.78922	0.0933152	0.18428	-4.81236
Fam178b	-0.904137	-1.18475	-3.87105	0.00144897	0.0212626	-0.992788
Cox5b	-0.474158	9.25649	-1.9576	0.0687016	0.151997	-4.54985
Actr1b	-0.533888	3.77179	-2.46974	0.0256914	0.0855859	-3.67547
Tmem131	-1.33773	6.90932	-3.78551	0.00172928	0.0228231	-1.16022
Gm38115	-2.30689	2.17021	-3.83313	0.00156708	0.0220179	-1.06699
Inpp4a	-0.614689	0.788701	-0.79935	0.436275	0.544188	-5.9831
Coa5	0.0817501	4.86885	0.404209	0.691632	0.770496	-6.22166
Unc50	-0.528191	5.47715	-2.5653	0.0212399	0.076686	-3.50235
Mgat4a	0.301152	3.86998	1.04076	0.314092	0.426141	-5.76679
Tsga10	0.283565	1.97524	0.639316	0.532038	0.632648	-6.09766
Gm26805	0.62855	-1.03689	1.2403	0.233479	0.342217	-5.55134
Lipt1	-0.53015	1.2829	-0.763744	0.456593	0.563507	-6.01063
Mitd1	-0.468559	5.7491	-1.87746	0.0795791	0.166611	-4.67658
Mrpl30	-0.153503	7.75735	-0.808163	0.431337	0.539617	-5.9761
Txndc9	-0.201102	7.09767	-1.2876	0.216948	0.325115	-5.49573
Eif5b	-0.29752	7.79139	-1.38761	0.185061	0.290396	-5.37278
Rev1	-0.404003	6.32964	-2.33489	0.0334996	0.0992368	-3.91509
Aff3	1.149	3.99586	2.71214	0.0158076	0.0658712	-3.23172
Chst10	-0.717242	-0.400085	-1.15893	0.264185	0.375406	-5.643
Pdcl3	0.0594975	4.53382	0.29539	0.771651	0.831684	-6.26055
Rpl31	-0.267076	10.0665	-1.24222	0.232787	0.341564	-5.54911
Tbc1d8	-2.0849	3.90675	-2.33855	0.0332611	0.098807	-3.90867
Cnot11	-0.226832	4.54061	-0.905253	0.379313	0.489831	-5.89445
Gm15832	-0.192191	-0.405555	-0.37678	0.711491	0.785642	-6.23259
Rnf149	-0.0997245	3.68314	-0.410571	0.687058	0.766206	-6.21902
Map4k4	0.401354	3.05566	1.10441	0.286418	0.39736	-5.70152
Il1r2	-0.567512	0.752411	-0.694121	0.497972	0.601993	-6.06111
Gm16894	-0.172367	-1.34923	-0.471245	0.64409	0.729709	-6.19182
Il1r1	-0.392577	3.18487	-1.2776	0.220366	0.328554	-5.50764
Il1rl2	-1.45167	1.75297	-2.28155	0.0371657	0.105584	-4.00821
Il1rl1	-1.49147	5.21738	-5.72812	3.64521e-05	0.00759036	2.49195
Il18r1	-1.2397	-0.0523642	-2.45223	0.0265975	0.0868286	-3.70689
Il18rap	-1.64965	0.317153	-2.61276	0.0193133	0.0730584	-3.41547
Gm37915	-0.576752	4.27276	-1.80229	0.0911568	0.18142	-4.79251
Mfsd9	-0.990307	0.20838	-2.05129	0.0576987	0.137352	-4.39778
Mrps9	0.210209	6.28023	1.46602	0.162816	0.265988	-5.27145
Tgfbrap1	0.0464291	3.10647	0.181129	0.858635	0.898907	-6.28849
8430432A02Rik	-0.332542	-1.22602	-1.01186	0.327282	0.438853	-5.79533
AI597479	-1.04795	1.98918	-1.38594	0.185558	0.290944	-5.37488
Nck2	0.379552	3.54878	1.05811	0.306364	0.418144	-5.74933
Gm29155	-0.523774	-1.47734	-1.77105	0.0963904	0.187653	-4.83979
Gm29156	0.0229496	-1.49948	0.0784499	0.938483	0.958664	-6.3022
Uxs1	0.528147	4.62977	3.05749	0.0078068	0.045733	-2.57805
Tpp2	0.0605314	6.56138	0.388143	0.703237	0.779615	-6.22815
Mettl21c	-0.237099	-1.29944	-0.567641	0.578482	0.674138	-6.14116
Gm8251	-2.1192	2.91515	-2.95149	0.00970666	0.0506558	-2.7808
Tex30	0.446885	6.12197	2.42906	0.0278436	0.0890719	-3.74835
Poglut2	1.05596	3.97225	3.33831	0.00436945	0.0339946	-2.03467
Bivm	-1.14036	1.90566	-1.62221	0.125102	0.222505	-5.05751
Ercc5	-2.24832	3.85748	-2.65074	0.0178931	0.0702312	-3.34551
Wdr75	0.470246	6.79285	2.21142	0.0425582	0.11367	-4.12908
Slc40a1	-0.243303	5.83149	-1.3142	0.208068	0.315508	-5.46374
Slc39a10	0.939112	4.07223	2.96421	0.0094566	0.0500737	-2.75655
Cavin2	-0.424514	-1.55369	-1.68405	0.112379	0.207523	-4.96861
Nabp1	-0.919864	0.798269	-1.56875	0.137076	0.236398	-5.13249
Gm17767	-0.755803	-1.29885	-2.49729	0.0243242	0.0827155	-3.62582
Myo1b	-0.517203	-1.48239	-1.87668	0.0796924	0.1667	-4.6778
Stat4	-2.2926	-0.116698	-4.74821	0.000243131	0.0114723	0.700326
Gm31812	-1.42702	-0.384115	-4.08246	0.000937368	0.0177203	-0.579976
Stat1	-0.538216	5.63367	-2.24974	0.0395276	0.109135	-4.06327
Gls	-0.0347189	6.33724	-0.219534	0.829125	0.877039	-6.28058
Nab1	-0.379669	4.26672	-1.72122	0.105286	0.198783	-4.9141
Nemp2	-2.18263	2.14457	-3.54913	0.0028221	0.0277356	-1.62304
Mfsd6	-0.246235	0.723138	-0.366018	0.719344	0.791669	-6.23667
Inpp1	-1.04591	0.46601	-2.00877	0.0624765	0.143583	-4.46729
Hibch	-1.78305	4.24863	-1.78633	0.0937971	0.184887	-4.81672
1700019D03Rik	-0.381424	-1.58684	-1.60661	0.128499	0.226914	-5.07957
1700019A02Rik	-1.58924	0.103511	-3.20581	0.00574832	0.0386375	-2.29197
Pms1	-0.656231	4.627	-3.30267	0.0047042	0.0353196	-2.104
Ormdl1	-0.491236	4.73585	-1.718	0.105884	0.199479	-4.91885
Osgepl1	-0.149652	5.81722	-0.616777	0.546417	0.645654	-6.11187
Asnsd1	-0.501747	6.07385	-2.2317	0.040928	0.111078	-4.09431
Stk17b	-0.744631	4.67413	-3.10132	0.00713264	0.043575	-2.49377
Hecw2	-0.801982	-1.26333	-2.64255	0.0181907	0.0709112	-3.36063
Ccdc150	0.469884	-0.914844	1.07238	0.30011	0.411312	-5.73478
Gtf3c3	0.0476032	3.89019	0.192234	0.850078	0.89304	-6.28636
Pgap1	-1.07404	-1.05405	-3.38709	0.00394927	0.0325279	-1.93962
Ankrd44	-0.217718	4.33264	-0.663905	0.516594	0.619353	-6.08161
4930444A19Rik	0.299116	-1.1819	0.606747	0.552882	0.651114	-6.11804
Sf3b1	-0.0861986	8.49076	-0.762085	0.457553	0.56427	-6.01189
Coq10b	-0.485317	5.16201	-2.4793	0.0252087	0.0845289	-3.65826
Hspd1	0.701403	9.90681	2.57847	0.0206878	0.0756884	-3.47831
Hspe1	0.324739	9.70094	1.18677	0.25335	0.363765	-5.61222
Mob4	-0.013108	5.95403	-0.0949075	0.925615	0.949972	-6.30073
Mars2	0.697684	3.58826	2.76716	0.0141399	0.0622048	-3.12905
Boll	-0.325568	-0.701372	-0.579352	0.570752	0.666823	-6.13439
Plcl1	-1.50792	-0.720297	-3.8533	0.00150309	0.0215709	-1.02751
Satb2	-0.470348	-1.51843	-1.72316	0.104926	0.19838	-4.91123
4930558J18Rik	-1.59591	1.61543	-2.71299	0.0157807	0.0658275	-3.23015
1700066M21Rik	0.623771	2.55919	2.0182	0.0613867	0.142225	-4.45195
Tyw5	-1.66266	3.29582	-1.99763	0.0637864	0.145219	-4.48537
Maip1	0.365604	5.51525	2.08659	0.0539887	0.132281	-4.33947
Kctd18	-1.55455	2.72895	-2.05698	0.0570857	0.136551	-4.38843
Sgo2a	-0.721101	6.1774	-3.07884	0.00747095	0.044691	-2.53703
Bzw1	0.394474	8.03915	2.91559	0.0104473	0.052488	-2.84908
Clk1	-0.305016	6.57851	-1.60478	0.128903	0.227301	-5.08215
Ppil3	0.837434	5.7843	3.92727	0.0012902	0.020235	-0.882846
Nif3l1	0.12884	3.97472	0.50146	0.623158	0.711982	-6.17691
Orc2	-0.265192	7.63819	-2.02104	0.0610621	0.141721	-4.44732
Gm15834	-1.13523	0.616983	-1.99959	0.063554	0.144846	-4.48219
Fam126b	0.217466	4.43746	1.07826	0.29756	0.4088	-5.72873
Ndufb3	-0.356342	7.27791	-1.64274	0.120747	0.217367	-5.02825
Flacc1	-0.508252	-1.48928	-1.8347	0.0859936	0.174758	-4.74289
Cflar	-2.31423	3.20144	-3.13618	0.0066377	0.0417384	-2.42658
Casp8	-0.0469227	4.7521	-0.277673	0.784966	0.841109	-6.26575
Trak2	-1.45479	7.31627	-4.81515	0.000212787	0.0110001	0.826689
Stradb	-3.21066	4.9265	-3.32159	0.00452343	0.0345398	-2.06721
Tmem237	-1.34773	1.61756	-2.02047	0.0611276	0.141846	-4.44826
G730003C15Rik	-0.26863	-1.06032	-0.642689	0.529904	0.630972	-6.09549
Mpp4	-0.852828	-1.22422	-2.46187	0.026095	0.0860807	-3.68961
Gm29017	-0.512871	-1.48572	-1.67844	0.113487	0.208943	-4.97678
Als2	-0.492921	3.12611	-1.46662	0.162654	0.265816	-5.27065
Fzd7	-1.34056	0.317838	-2.15676	0.0472559	0.121299	-4.22199
Gm26813	0.571497	-0.481022	0.942587	0.360483	0.471999	-5.86085
Gm973	-0.824626	-1.24591	-2.64026	0.0182745	0.0710325	-3.36485
Sumo1	0.226723	7.50764	1.89114	0.0776203	0.164298	-4.65518
Nop58	0.273745	8.19907	1.08258	0.2957	0.407038	-5.72428
Bmpr2	-0.0479299	3.53844	-0.099872	0.921738	0.947194	-6.30023
Fam117b	0.026298	4.95758	0.119466	0.906455	0.935359	-6.29802
Ica1l	1.58273	0.670885	2.17077	0.0460083	0.119195	-4.19829
Wdr12	0.984401	6.70919	3.78697	0.00172407	0.0228231	-1.15736
Carf	-1.28496	2.07364	-1.87775	0.0795375	0.166548	-4.67613
Nbeal1	-1.69144	3.62203	-1.88013	0.079193	0.166108	-4.67241
Cyp20a1	0.083846	4.94619	0.411395	0.686466	0.765835	-6.21868
Abi2	-0.176868	4.01087	-0.724915	0.479403	0.584805	-6.03934
Raph1	-0.673012	0.32715	-1.18696	0.253278	0.363708	-5.61201
Ctla4	-0.671238	0.622911	-1.13776	0.272658	0.383803	-5.666
Pard3b	1.49538	0.784417	1.97995	0.0659167	0.148113	-4.51394
Nrp2	0.0822036	-1.01504	0.161418	0.873869	0.910418	-6.29196
Ino80d	-0.0257905	4.99446	-0.154385	0.879317	0.914166	-6.2931
Ino80dos	-1.96926	1.6055	-3.52493	0.00296738	0.0285211	-1.67039
Gm20342	-1.50535	2.13958	-2.16568	0.046458	0.119936	-4.20691
Ndufs1	-0.320243	6.43756	-1.80865	0.090122	0.180135	-4.78281
Eef1b2	-0.171481	10.5914	-0.962444	0.350735	0.462518	-5.84248
Adam23	-1.07446	0.273115	-1.8992	0.0764859	0.162631	-4.64252
Fastkd2	0.75124	4.72488	3.15535	0.00638011	0.0408995	-2.38957
Klf7	0.5282	2.9319	1.80797	0.0902324	0.180307	-4.78385
Creb1	-0.108703	5.82313	-0.715212	0.485209	0.590327	-6.04629
Mettl21a	0.318974	2.98118	1.02583	0.320859	0.432157	-5.78162
2810408I11Rik	-0.664391	4.81691	-1.86228	0.0818064	0.169455	-4.70024
Ccnyl1	-1.25482	1.32173	-1.99498	0.0641012	0.145645	-4.48966
Fzd5	-3.61081	2.40364	-5.03638	0.000137457	0.00947558	1.24051
Plekhm3	-0.171194	3.40387	-0.629505	0.53827	0.638574	-6.10391
Idh1	-1.76934	2.70366	-2.33939	0.0332064	0.0987068	-3.90719
Pikfyve	0.26844	5.27644	1.2953	0.214349	0.322107	-5.48653
Rpe	-0.232214	5.23223	-1.35824	0.194006	0.300173	-5.40964
Kansl1l	0.164615	4.36806	0.689395	0.500858	0.604595	-6.06437
Acadl	-1.31457	7.25935	-3.22501	0.00552464	0.0378562	-2.25479
Lancl1	-0.123971	4.46149	-0.492367	0.629423	0.717315	-6.18149
Ikzf2	-2.15914	1.10748	-3.43529	0.00357363	0.0310505	-1.84556
Bard1	-0.671413	6.46893	-2.81727	0.01277	0.0587596	-3.03499
Atic	0.863399	7.06803	3.81772	0.0016178	0.0222013	-1.09715
Fn1	-1.43357	1.37549	-2.05139	0.0576881	0.137352	-4.39762
Mreg	-0.715734	-1.32967	-2.5322	0.0226913	0.0794367	-3.56261
Pecr	0.670532	2.98573	2.09808	0.0528294	0.130541	-4.32038
Xrcc5	0.890296	5.52921	3.49599	0.00315092	0.0293367	-1.72697
Smarcal1	-1.57141	2.8577	-2.03109	0.0599257	0.140323	-4.43091
Rpl37a	-0.294322	10.5465	-0.930149	0.366683	0.477768	-5.87218
Tns1	-0.260503	4.73541	-1.36489	0.191949	0.298018	-5.40134
Rufy4	-0.4112	-1.56393	-1.64831	0.119588	0.21628	-5.02026
Cxcr2	-1.24783	1.17944	-1.7445	0.101044	0.19351	-4.87956
Arpc2	0.522303	7.36106	2.81153	0.0129202	0.0591382	-3.04579
Aamp	-0.37273	5.39652	-1.72189	0.105162	0.198671	-4.91311
Pnkd	-0.457819	5.07827	-1.54213	0.143392	0.243855	-5.16915
Tmbim1	0.574389	2.26718	1.35165	0.19606	0.302499	-5.41782
Gm29358	-1.60541	-0.0320319	-3.05148	0.00790392	0.0460587	-2.58958
Slc11a1	-0.916631	-0.561863	-2.27022	0.0379915	0.106804	-4.02786
Ctdsp1	-0.533018	4.19675	-2.7745	0.0139305	0.0617601	-3.11529
Vil1	-0.105142	-1.40095	-0.309358	0.761207	0.823418	-6.25623
Usp37	-0.745091	6.2649	-3.59024	0.0025915	0.0266647	-1.5426
Cnot9	0.0415901	5.43981	0.349594	0.731391	0.800291	-6.24267
Plcd4	-0.410618	-1.56438	-1.74399	0.101135	0.193658	-4.88031
Zfp142	-0.153507	3.78327	-0.660953	0.518434	0.621157	-6.08357
Bcs1l	0.700493	3.38864	2.3237	0.0342396	0.100488	-3.93471
Rnf25	-1.99762	3.45391	-2.45726	0.0263345	0.0863655	-3.69789
Ttll4	-2.0605	3.54208	-2.4982	0.0242804	0.0826505	-3.62418
Cyp27a1	-0.218266	-0.385498	-0.466613	0.647327	0.732537	-6.19402
Nhej1	-2.32371	3.05305	-3.25636	0.0051776	0.0368208	-2.19398
Slc23a3	-0.567383	-0.51536	-1.06981	0.301229	0.412541	-5.73741
Cnppd1	-0.639132	6.19499	-3.39617	0.00387564	0.0322472	-1.92192
Retreg2	-0.223268	5.80399	-0.966355	0.348837	0.460628	-5.83883
Zfand2b	-0.890048	5.51493	-2.46373	0.0259991	0.0860118	-3.68627
Abcb6	-2.88479	4.08658	-3.57094	0.00269728	0.0271948	-1.58036
Atg9a	-0.23378	3.43029	-0.770524	0.452679	0.559796	-6.00548
Ankzf1	-1.67482	2.58622	-2.30326	0.0356303	0.103221	-3.97043
Glb1l	-2.9451	1.5521	-5.03654	0.000137415	0.00947558	1.2408
Stk16	-0.0871567	5.82488	-0.561302	0.582689	0.677497	-6.14477
Tuba4a	-0.678839	8.53915	-3.15266	0.00641562	0.0410561	-2.39477
A630095N17Rik	-0.559504	-1.44985	-2.10244	0.0523951	0.129836	-4.31312
Dnajb2	-2.9425	4.85177	-3.07857	0.00747509	0.044691	-2.53755
Ptprn	-0.49319	-1.50086	-2.30618	0.0354285	0.102777	-3.96533
Dnpep	-0.227706	4.47566	-0.844874	0.411149	0.520202	-5.94622
Gmppa	0.362378	3.01302	1.47138	0.161378	0.264504	-5.26436
Chpf	-2.31621	0.299877	-4.94461	0.000164661	0.0102684	1.06958
Stk11ip	1.11049	1.51356	2.37221	0.0311396	0.0950184	-3.84936
Epha4	-0.526606	-1.47516	-1.56809	0.137228	0.236606	-5.1334
Farsb	0.0480363	6.65103	0.382698	0.707188	0.782765	-6.23029
Acsl3	-0.0570674	5.33354	-0.348502	0.732194	0.800953	-6.24306
Utp14b	0.548293	2.64124	1.63811	0.121718	0.218346	-5.03488
Ap1s3	-1.1257	1.35922	-1.69378	0.110483	0.205403	-4.95442
Wdfy1	-1.39086	2.09835	-2.00013	0.0634903	0.14479	-4.48132
Mrpl44	0.641952	5.76133	3.43077	0.00360732	0.0311381	-1.8544
Serpine2	-0.352516	-0.0673677	-0.602416	0.555687	0.653225	-6.12067
Cul3	-0.0157858	6.79765	-0.110121	0.913739	0.941107	-6.29913
Dock10	-0.266326	5.40384	-0.580487	0.570006	0.666251	-6.13372
Rhbdd1	-2.51926	4.28316	-2.82031	0.0126914	0.0586078	-3.02928
C430014B12Rik	-1.111	-0.627208	-2.87106	0.0114432	0.0551902	-2.93349
Mff	-0.753153	6.6309	-3.84575	0.00152672	0.0217271	-1.04229
Gm28941	-0.847972	-0.829538	-1.72383	0.104803	0.198189	-4.91024
Agfg1	-0.900737	6.85729	-3.94123	0.00125359	0.0201175	-0.855567
A030005L19Rik	-0.816395	-1.25224	-3.41605	0.00371909	0.0316422	-1.88312
Pid1	-1.36793	1.01085	-2.18245	0.0449908	0.117561	-4.17846
Trip12	-0.543087	6.96658	-3.06888	0.00762581	0.0451158	-2.55617
Fbxo36	-1.83348	2.71603	-2.58263	0.0205158	0.0753641	-3.47069
C130026I21Rik	-0.878514	-1.20446	-3.46504	0.00335981	0.0301942	-1.78746
A530032D15Rik	-0.45449	-1.53063	-1.80168	0.0912558	0.18152	-4.79343
Sp110	-0.403435	4.1157	-1.36842	0.190864	0.296827	-5.39692
Sp140	-2.65561	3.55819	-3.57713	0.0026629	0.0270411	-1.56825
Sp100	-1.65303	5.65552	-4.79564	0.000221205	0.0112276	0.789918
A630001G21Rik	-1.38645	2.81971	-1.72378	0.104811	0.198189	-4.91031
Cab39	0.0284268	6.51195	0.188724	0.85278	0.894927	-6.28704
Itm2c	0.517555	3.3747	1.79821	0.0918244	0.182333	-4.7987
Psmd1	-0.384812	7.71886	-2.87248	0.0114101	0.0551205	-2.93081
Htr2b	-1.12294	-1.01644	-4.21536	0.000713858	0.0160304	-0.321569
Armc9	-1.19569	5.31066	-3.75015	0.00186056	0.0231987	-1.22945
Gm16341	-0.927585	-0.553437	-1.57492	0.135645	0.235024	-5.12392
B3gnt7	-1.63478	0.54416	-2.00527	0.0628851	0.144119	-4.47298
Gm28626	-0.843476	-0.832997	-1.89207	0.0774879	0.164087	-4.65371
Ncl	0.498598	10.7742	1.86716	0.0810834	0.168568	-4.69263
C130036L24Rik	-2.09152	1.76575	-3.82107	0.00160665	0.0221303	-1.0906
Ptma	-0.0435637	12.5577	-0.209213	0.837031	0.882838	-6.28286
Pde6d	-0.997755	5.49008	-3.35544	0.00421707	0.0334615	-2.00131
Cops7b	-1.94152	3.86996	-2.16192	0.0467931	0.120611	-4.21327
Dis3l2	-0.0518668	5.4605	-0.33938	0.738919	0.806148	-6.24627
Gm29055	0.187399	-0.482686	0.321769	0.751965	0.816303	-6.25222
Gm28375	-0.552354	0.347337	-1.02847	0.319652	0.43108	-5.77901
Eif4e2	0.12142	6.51859	0.977895	0.343279	0.454912	-5.82796
Gigyf2	-0.242446	6.4631	-1.77109	0.096383	0.187653	-4.83973
Kcnj13	-0.513321	-0.872101	-1.27517	0.221199	0.329354	-5.51051
Ngef	-0.485892	-1.50648	-1.78445	0.0941125	0.185219	-4.81956
Inpp5d	0.275996	5.6866	1.84124	0.0849832	0.173514	-4.73281
Atg16l1	-0.136906	5.11584	-0.813399	0.428419	0.537236	-5.97191
Sag	-2.47422	0.421423	-6.531	8.46234e-06	0.0046452	3.85408
Dgkd	0.325855	4.45543	1.59899	0.130187	0.228804	-5.09029
Usp40	0.320277	2.66482	0.842459	0.412458	0.521457	-5.94822
Gm20528	-0.625944	-1.39874	-2.22874	0.0411626	0.11151	-4.0994
Ugt1a7c	-0.456908	-1.52877	-1.75449	0.0992701	0.191424	-4.86464
Dnajb3	0.448204	3.74475	0.769531	0.453251	0.560457	-6.00624
Mroh2a	-0.853298	-1.22386	-3.15369	0.00640196	0.0409864	-2.39277
Hjurp	-0.43867	6.59475	-2.72818	0.0153026	0.0649484	-3.20185
Trpm8	0.0150326	-1.49339	0.0451052	0.964605	0.976421	-6.30432
Glrp1	-0.861171	-0.604524	-2.03185	0.0598404	0.140198	-4.42967
Arl4c	-0.508846	-0.161975	-0.885595	0.38949	0.499709	-5.91166
Sh3bp4	-0.55554	-1.4529	-1.83274	0.0862974	0.174944	-4.7459
Agap1	0.300112	5.81598	1.57596	0.135405	0.234745	-5.12247
4933400F21Rik	-0.353244	-1.2101	-0.970252	0.346953	0.458674	-5.83517
Gbx2	-0.392004	-1.5787	-1.43846	0.170369	0.274043	-5.30755
D130058E05Rik	0.520611	0.224691	0.71507	0.485294	0.590327	-6.0464
Cops8	0.438597	5.55861	2.34724	0.0327009	0.0977729	-3.8934
Lrrfip1	0.449076	3.08388	0.94337	0.360095	0.471631	-5.86013
Rbm44	-1.65063	-0.610521	-2.00308	0.0631424	0.144486	-4.47653
Ramp1	-1.45602	2.92921	-1.63952	0.121421	0.217999	-5.03285
Ube2f	0.448733	5.85951	2.9137	0.010488	0.0526209	-2.85268
Scly	-0.311145	5.99685	-1.91165	0.0747626	0.160254	-4.6229
Gm17090	-0.852826	-0.258525	-1.39819	0.181922	0.286959	-5.35936
Erfe	-3.88748	2.8311	-5.02139	0.000141561	0.00962422	1.21267
Ilkap	-0.177005	7.0934	-1.28809	0.216781	0.324926	-5.49515
Hes6	0.469271	3.36568	1.47205	0.161202	0.264259	-5.26349
Per2	0.587467	2.22375	1.3797	0.187436	0.293068	-5.38277
Traf3ip1	-1.93522	2.94867	-2.61435	0.0192515	0.0729176	-3.41254
Asb1	-2.89644	4.06407	-3.55172	0.00280701	0.0276797	-1.61798
Hdac4	-1.64852	3.39724	-1.90885	0.0751473	0.160686	-4.62732
Ndufa10	0.207485	7.17819	1.39295	0.18347	0.28885	-5.36601
Cops9	-0.305394	7.20677	-0.90626	0.378796	0.489377	-5.89356
Otos	-0.469806	-1.51885	-1.48215	0.158525	0.261002	-5.25009
Gpc1	-0.830452	0.448258	-1.3515	0.196105	0.302536	-5.418
Ankmy1	-0.486963	-1.50565	-2.06931	0.0557765	0.13466	-4.36808
Dusp28	0.377601	2.7243	1.17094	0.259471	0.370415	-5.6298
5033417F24Rik	-0.63421	-1.39239	-1.93021	0.072259	0.156755	-4.59352
Rnpepl1	0.358566	3.49038	0.896061	0.384049	0.49433	-5.90254
9430060I03Rik	1.79187	0.228776	2.96085	0.00952211	0.0501875	-2.76297
Capn10	-2.05286	3.41799	-2.49287	0.0245388	0.0831101	-3.6338
Gpr35	-1.60642	-0.644531	-4.88879	0.000183868	0.0105216	0.96509
Sned1	-0.483114	-1.50861	-1.72183	0.105173	0.198671	-4.9132
Mterf4	-1.86019	3.13475	-2.40356	0.0292791	0.0916158	-3.79378
Gm28535	-0.684648	-0.425157	-1.22441	0.239245	0.348487	-5.56964
Pask	-0.103247	3.95818	-0.335494	0.741791	0.808389	-6.24761
Ppp1r7	-0.358677	6.76833	-2.64718	0.018022	0.070569	-3.35209
Hdlbp	0.00919635	7.22603	0.0732475	0.942555	0.961564	-6.30261
Sept2	-1.6068	1.69001	-2.55615	0.0216321	0.0775065	-3.51904
Farp2	-0.889997	1.32091	-1.34265	0.198893	0.305502	-5.42895
Stk25	-0.87053	5.72864	-2.4034	0.0292882	0.0916158	-3.79407
Thap4	-0.0629962	3.39467	-0.251957	0.804415	0.856236	-6.27274
Gm10550	0.538415	-0.604716	1.02456	0.321439	0.432741	-5.78287
Atg4b	-0.478392	6.39344	-2.2211	0.0417732	0.112383	-4.11252
Dtymk	-0.210898	8.93545	-1.14266	0.270679	0.381634	-5.66071
Ing5	0.0790904	5.57796	0.45449	0.655834	0.740072	-6.19969
D2hgdh	-1.20956	1.58404	-1.94858	0.0698545	0.153471	-4.56426
Pdcd1	-0.385073	-1.58403	-1.45536	0.165703	0.269049	-5.28547
Fam174a	0.903636	4.59148	4.78502	0.000225931	0.011367	0.769877
St8sia4	-1.20674	1.63022	-1.72153	0.105227	0.198723	-4.91364
Slco4c1	-1.42965	-0.0192503	-2.94436	0.00984945	0.0509169	-2.79437
Panct2	0.818668	-1.18314	1.66044	0.1171	0.213315	-5.00283
Gm28901	-0.43457	-1.54595	-1.51	0.151341	0.253335	-5.2128
D1Ertd622e	-0.396718	5.8765	-1.94128	0.0708011	0.154747	-4.5759
Ppip5k2	0.0336467	4.89985	0.151476	0.881572	0.916189	-6.29356
Gin1	-2.47619	4.48843	-2.64821	0.0179845	0.0704968	-3.35019
Pam	-0.763909	2.06104	-0.949259	0.357187	0.468808	-5.85471
B230216N24Rik	1.54457	-0.657409	2.09289	0.0533506	0.131381	-4.32902
1810006J02Rik	-0.693983	-1.34641	-2.07828	0.0548424	0.133315	-4.35326
Gm28403	-1.62582	0.697235	-3.43343	0.00358746	0.0311117	-1.8492
Pign	-0.118472	4.64166	-0.781667	0.446293	0.55384	-5.99692
Gm28404	-0.718069	-1.32788	-2.46851	0.0257539	0.0856248	-3.67767
Relch	-0.265644	5.9073	-1.82448	0.0875926	0.176771	-4.75859
Tnfrsf11a	-1.11403	-1.02329	-3.22972	0.005471	0.0377502	-2.24565
Gm7160	-0.786778	0.87218	-1.20196	0.247583	0.357574	-5.59516
Zcchc2	0.854681	3.63051	2.86694	0.0115401	0.055391	-2.94129
Phlpp1	-2.09414	3.809	-2.35539	0.0321833	0.0970082	-3.87904
Bcl2	-1.45924	1.39524	-2.13004	0.0497227	0.125635	-4.26696
Kdsr	0.847381	2.76673	2.25998	0.0387525	0.107899	-4.04559
Vps4b	0.339718	5.72053	2.71466	0.0157274	0.0657662	-3.22704
Serpinb2	-0.189989	-0.805664	-0.33873	0.7394	0.80644	-6.24649
Serpinb8	0.809046	-1.17574	1.93441	0.071702	0.156118	-4.58684
Dsel	0.0212081	-0.569709	0.0442227	0.965297	0.976764	-6.30436
Tsn	-0.258141	8.42215	-1.8096	0.0899675	0.179996	-4.78135
Nifk	0.692578	6.46675	3.26166	0.00512118	0.0367235	-2.1837
Clasp1	-0.106238	6.33028	-0.733272	0.474436	0.580023	-6.03328
2900060B14Rik	-1.21626	1.15066	-2.13757	0.0490163	0.124417	-4.25433
Ralb	-1.1154	1.92914	-1.50269	0.153199	0.255349	-5.22264
Gm27184	-0.917627	-1.17437	-3.10386	0.00709529	0.0434295	-2.48887
Tmem185b	1.64729	2.23865	3.67631	0.002168	0.0243538	-1.37405
Epb41l5	-1.91685	2.74367	-2.70072	0.0161769	0.0665808	-3.25295
Ptpn4	-0.530393	5.13561	-2.32641	0.0340591	0.100157	-3.92997
Tmem177	0.481212	2.37256	1.38046	0.187205	0.292862	-5.3818
Tmem37	-0.0938216	-1.40965	-0.264306	0.795058	0.848959	-6.26947
Dbi	0.00691987	7.8893	0.0378381	0.970304	0.980062	-6.30463
3110009E18Rik	0.398501	4.05808	1.72452	0.104676	0.198136	-4.90923
Steap3	0.208348	7.44692	1.02127	0.322946	0.434296	-5.78611
Marco	-1.76975	-0.518895	-4.91749	0.000173721	0.0103772	1.01886
Insig2	-0.264121	3.86519	-1.24897	0.230379	0.339071	-5.54128
Ccdc93	0.735444	3.16798	2.25934	0.0388002	0.107899	-4.04668
Ddx18	0.209475	6.62362	0.844031	0.411605	0.52064	-5.94692
Dpp10	-0.368266	-1.59696	-1.59695	0.130643	0.229307	-5.09316
Actr3	0.195684	6.97091	1.24432	0.232038	0.340667	-5.54669
Slc35f5	-1.14651	-0.237052	-2.44597	0.0269288	0.087314	-3.71811
Nckap5	-0.743146	0.3811	-1.48593	0.157534	0.260001	-5.24506
Mgat5	0.431596	5.12056	1.54049	0.143789	0.244335	-5.1714
Acmsd	-0.389312	4.10722	-1.91194	0.0747232	0.160225	-4.62245
2900009J06Rik	-1.23588	1.30716	-2.0809	0.0545715	0.133132	-4.34891
Ccnt2	-0.346633	5.84878	-1.87623	0.0797571	0.166749	-4.6785
Rab3gap1	-2.31948	4.8996	-2.23827	0.0404131	0.11048	-4.08303
Zranb3	-0.950518	5.49676	-3.50695	0.00308013	0.0289845	-1.70555
Gm28800	-0.430995	-1.5487	-1.64585	0.1201	0.216915	-5.0238
R3hdm1	-0.194345	7.40422	-1.56899	0.137019	0.236354	-5.13215
Ubxn4	0.02249	7.08923	0.228024	0.822635	0.87153	-6.27863
Lct	-1.08579	-0.646604	-2.65603	0.0177036	0.0698391	-3.33575
Mcm6	-0.276745	7.68627	-1.51939	0.148981	0.250544	-5.20012
Dars	-0.0393134	6.72795	-0.316045	0.756223	0.81973	-6.25409
Cxcr4	-0.942127	5.0963	-3.08222	0.007419	0.0445531	-2.53052
Thsd7b	-2.64369	0.914626	-4.38591	0.000504275	0.0141769	0.00825396
Cd55b	-1.045	-1.0764	-2.67317	0.0171025	0.0684515	-3.30406
Gm15674	-0.525006	-1.47639	-1.94322	0.0705481	0.154377	-4.57281
Gm15675	-1.73427	2.0968	-2.67603	0.017004	0.0683342	-3.29876
Cd55	-0.514644	5.66913	-2.27099	0.037935	0.106804	-4.02653
Gm16083	-1.25483	1.35306	-1.97335	0.0667284	0.149399	-4.52457
Pfkfb2	-2.55702	3.12728	-3.57725	0.00266223	0.0270411	-1.56801
Yod1	-2.95206	4.59338	-3.25126	0.00523261	0.0369055	-2.20389
AA986860	-2.48221	2.46391	-3.77386	0.00177147	0.0230764	-1.18303
Gm28857	-1.48437	1.93607	-2.23685	0.0405241	0.11065	-4.08547
Il10	-0.242232	-1.29549	-0.704424	0.491712	0.595495	-6.05392
Mapkapk2	0.74061	4.00077	2.87557	0.0113383	0.0548449	-2.92496
Dyrk3	-0.356519	5.59863	-1.28083	0.219255	0.327539	-5.5038
Eif2d	-0.17488	5.18185	-1.31024	0.209373	0.316838	-5.46854
Rassf5	-0.912071	1.59197	-1.19891	0.248733	0.35884	-5.59861
Ikbke	-0.354506	0.674557	-0.565861	0.579662	0.675354	-6.14217
Srgap2	-0.316507	5.59496	-2.20508	0.0430803	0.114542	-4.13992
Gm29488	-1.3116	-0.472901	-3.66021	0.00224156	0.0247742	-1.40559
Fam72a	-2.44974	1.42161	-3.54407	0.0028519	0.0279365	-1.63295
Ctse	-1.62744	9.18645	-3.73098	0.0019359	0.0235183	-1.267
Rab7b	-0.958112	0.654457	-1.16799	0.260621	0.371696	-5.63305
Slc41a1	-0.781075	0.047432	-1.5271	0.147065	0.248167	-5.18965
Rab29	-1.3438	2.69767	-1.65481	0.118249	0.214749	-5.01093
Nucks1	-0.206112	8.4838	-1.52198	0.148335	0.249677	-5.19661
Slc45a3	-1.71942	-0.159196	-3.73456	0.00192161	0.0234756	-1.25999
Elk4	-0.299168	4.95218	-1.74969	0.100119	0.192385	-4.87181
Mfsd4a	-1.53875	0.0646735	-3.49219	0.00317584	0.0294551	-1.7344
Nuak2	-0.985528	0.848779	-1.57022	0.136732	0.236108	-5.13044
Tmcc2	-1.63843	4.57343	-5.53093	5.28818e-05	0.00843653	2.1422
Dstyk	-0.541342	3.8458	-1.88452	0.078563	0.165395	-4.66555
6030442K20Rik	0.726132	2.04446	1.57284	0.136126	0.235583	-5.12682
Rbbp5	0.14071	4.66924	0.672135	0.511483	0.614816	-6.07611
Tmem81	0.17523	-0.325344	0.291225	0.774775	0.83369	-6.2618
Mdm4	-0.398715	6.29015	-2.37426	0.031015	0.0946998	-3.84574
Pik3c2b	-1.0601	0.62491	-2.03652	0.0593195	0.13961	-4.42203
Ppp1r15b	-0.731151	6.08457	-3.26669	0.00506808	0.0367077	-2.17392
Plekha6	0.26193	-0.0949109	0.453463	0.656557	0.740663	-6.20017
Sox13	-0.684527	-1.35368	-2.41354	0.0287095	0.0906869	-3.77604
Snrpe	-0.220953	9.57874	-1.03787	0.315393	0.427671	-5.76967
Zc3h11a	-1.18406	1.13039	-1.99096	0.0645825	0.146145	-4.49616
Gm38394	-1.46957	0.358898	-2.56877	0.0210929	0.0764491	-3.49601
Lax1	-1.46946	-0.749884	-4.75515	0.000239786	0.0114723	0.713458
Atp2b4	-1.20303	7.39858	-5.41927	6.54323e-05	0.00843653	1.94161
Optc	1.51124	-0.631771	2.09108	0.0535326	0.131598	-4.33202
Prelp	-0.520375	-1.47995	-1.86165	0.0818994	0.169577	-4.70121
Btg2	-4.29987	6.60991	-3.78796	0.00172053	0.0228231	-1.15542
Chit1	-0.770563	-1.2875	-2.9474	0.0097884	0.0508126	-2.7886
Chil1	-1.26412	1.54249	-1.95975	0.0684293	0.151598	-4.54641
Ppfia4	-2.13488	-0.238024	-5.87952	2.74916e-05	0.00679087	2.7565
Tmem183a	-0.346893	5.72037	-1.53641	0.144779	0.245562	-5.17696
Cyb5r1	0.613712	4.09746	2.66599	0.0173518	0.0690721	-3.31734
Adipor1	-0.685689	6.62589	-3.45801	0.00340913	0.0303699	-1.80118
Platr1	1.84596	-0.889247	2.56747	0.0211481	0.0765058	-3.4984
Klhl12	-0.688804	5.99765	-3.41443	0.00373165	0.0316689	-1.88629
Rabif	-0.394631	4.08568	-1.93125	0.0721204	0.156707	-4.59186
Mgat4e	-0.425666	-1.5528	-1.27751	0.220395	0.328554	-5.50774
Kdm5b	0.129521	4.60016	0.611498	0.549815	0.648687	-6.11513
Syt2	-0.452695	-1.53201	-1.62879	0.123691	0.221003	-5.04815
Ppp1r12b	-0.237124	5.28497	-1.32893	0.203276	0.310114	-5.4458
Ube2t	-0.900472	5.80141	-2.45609	0.0263953	0.0865052	-3.69998
Ptpn7	-0.018501	5.10358	-0.0735973	0.942281	0.9615	-6.30258
Arl8a	-2.3314	3.74792	-2.84523	0.0120627	0.0570457	-2.9823
Gm15445	-0.397955	-1.1757	-1.05395	0.308202	0.420111	-5.75353
Rnpep	0.0145902	4.70236	0.0686113	0.946184	0.964006	-6.30295
Timm17a	0.337951	7.29833	2.35474	0.0322241	0.0970407	-3.88018
Ipo9	-0.401288	5.16527	-2.06776	0.0559401	0.134767	-4.37065
Nav1	-2.19575	0.851289	-3.77789	0.00175674	0.0230089	-1.17513
Csrp1	-0.192261	5.23016	-0.857948	0.404111	0.513794	-5.93528
Phlda3	0.0114557	2.70021	0.0263846	0.97929	0.986077	-6.30501
Tmem9	-0.848624	6.56162	-3.69892	0.0020688	0.0238937	-1.32978
Cacna1s	-0.419661	-1.55742	-1.65773	0.117651	0.21402	-5.00673
Kif21b	-0.868113	1.59286	-1.24474	0.231884	0.340549	-5.54619
Mroh3	0.501992	-1.33796	1.08472	0.294778	0.406032	-5.72206
Gm26781	-1.0335	-1.08524	-3.53246	0.00292135	0.028262	-1.65565
Camsap2	-0.804455	6.81871	-3.77166	0.00177953	0.0230764	-1.18732
9230116N13Rik	-1.93143	2.30952	-2.97089	0.00932781	0.0497114	-2.7438
Ddx59	-0.487745	2.94204	-1.09838	0.288959	0.399838	-5.70784
Kif14	-3.36097	5.45777	-3.3494	0.00427016	0.0335228	-2.01307
Gm37799	-1.75485	-0.530355	-4.4302	0.000460937	0.0138729	0.0935306
Zfp281	0.232238	3.49035	0.919277	0.372163	0.48304	-5.88197
Gm19705	-0.925334	-0.555168	-2.51143	0.0236495	0.0812681	-3.60025
Gm4258	-1.06693	1.78847	-1.45937	0.164613	0.267985	-5.28021
Gm26930	-0.596826	-1.42114	-1.83376	0.0861396	0.174863	-4.74434
Ptprc	-0.76911	4.30305	-2.62183	0.0189647	0.0723117	-3.3988
Nek7	-0.970004	5.05273	-4.2599	0.000651775	0.0154144	-0.235235
Gm28501	-1.12953	-0.612955	-2.74552	0.0147743	0.0636385	-3.1695
2310009B15Rik	-0.488039	5.11282	-1.54994	0.141512	0.241602	-5.15843
Dennd1b	0.400702	5.10643	2.06376	0.0563626	0.135367	-4.37725
Zbtb41	-1.65792	3.07326	-2.0725	0.0554429	0.134119	-4.36282
Aspm	-0.490326	7.08833	-2.29905	0.0359235	0.103493	-3.97777
Cfh	0.0433019	-0.586704	0.0883159	0.930767	0.953185	-6.30135
Cdc73	0.150763	6.16569	1.03354	0.317352	0.429306	-5.77398
B3galt2	-0.883758	-1.20042	-2.46825	0.0257672	0.0856248	-3.67814
Glrx2	-0.117815	6.5808	-0.707376	0.489928	0.594062	-6.05185
Ro60	1.77954	1.15825	2.94515	0.00983355	0.0508931	-2.79287
Uchl5	-0.0610478	7.13362	-0.653087	0.523357	0.624933	-6.08874
Gm29170	0.72413	2.42094	2.30333	0.0356253	0.103221	-3.9703
Rgs2	-1.5534	2.57546	-2.06282	0.0564624	0.135497	-4.3788
Rgs13	-0.694656	-1.34589	-2.12415	0.0502825	0.126311	-4.27684
Rgs1	-0.767413	-0.528663	-1.27924	0.219803	0.328034	-5.50569
Rgs18	-1.83476	2.89988	-2.30287	0.0356579	0.103257	-3.97112
A230059L01Rik	-0.510685	-1.4874	-1.4684	0.162176	0.265241	-5.26831
Pla2g4a	0.263902	5.4548	1.27997	0.219552	0.327784	-5.50482
Ptgs2	-0.714695	-1.33047	-2.17515	0.0456243	0.118631	-4.19086
Odr4	-0.0431096	5.17414	-0.350105	0.731015	0.800035	-6.24249
Tpr	-0.25946	8.94165	-1.80406	0.0908666	0.181086	-4.7898
C730036E19Rik	-0.543182	-1.46241	-1.75786	0.0986789	0.190632	-4.8596
Gm47985	-0.773167	-1.28549	-2.53464	0.0225811	0.0792725	-3.55817
Gm8947	-0.386463	-1.58296	-1.38253	0.186583	0.292128	-5.3792
Gm10138	-1.81263	2.45458	-2.63244	0.0185645	0.0714475	-3.37927
Ivns1abp	0.243017	6.49785	1.64616	0.120034	0.216822	-5.02335
Swt1	-0.598806	5.77109	-3.3928	0.0039028	0.032369	-1.92849
Trmt1l	0.155732	5.01867	1.17938	0.256193	0.366792	-5.62045
Rnf2	0.301775	3.55604	1.15812	0.264505	0.375719	-5.64389
Fam129a	-0.980292	1.54578	-1.35877	0.193839	0.300142	-5.40897
2810414N06Rik	0.0593153	-0.384161	0.116809	0.908525	0.937026	-6.29834
Edem3	0.0399764	4.27539	0.220208	0.828609	0.8767	-6.28043
1700025G04Rik	-0.864326	0.980729	-1.08639	0.294063	0.405198	-5.72033
Tsen15	0.21101	5.60127	1.03361	0.317318	0.429299	-5.77391
Rgl1	-2.51672	0.929962	-4.58188	0.000339308	0.0126131	0.384219
Arpc5	-0.260091	8.03286	-1.79064	0.0930777	0.183909	-4.8102
Ncf2	-0.0168159	3.07824	-0.0474885	0.962736	0.975133	-6.30421
Smg7	-0.0484283	5.98013	-0.329172	0.746471	0.811929	-6.24975
Gm28791	0.801837	1.87537	1.90732	0.0753579	0.16091	-4.62973
Nmnat2	-0.533013	-0.143385	-1.12054	0.279698	0.390523	-5.68445
Lamc1	-1.44956	1.50285	-1.81877	0.0884972	0.178112	-4.76734
E330020D12Rik	-0.319811	-0.7058	-0.52709	0.605661	0.696555	-6.16357
Shcbp1l	-1.34951	-0.228878	-2.83124	0.0124118	0.0578073	-3.00869
Dhx9	0.0214602	7.7921	0.17396	0.864169	0.902724	-6.2898
Npl	0.208755	0.128278	0.27845	0.784381	0.840708	-6.26553
Gm28513	-1.62575	-0.0163889	-4.09395	0.000915514	0.0175291	-0.557602
Rnasel	-1.06025	4.42705	-5.41297	6.62259e-05	0.00843653	1.93025
Gm28512	-1.50297	-0.724109	-4.57303	0.000345406	0.012716	0.36732
Rgsl1	-0.293323	-1.65461	-1.31801	0.206819	0.314096	-5.45911
Teddm2	-0.10875	0.240539	-0.189845	0.851917	0.89441	-6.28683
Glul	-1.10761	5.81533	-2.99569	0.00886481	0.0485713	-2.69645
Cacna1e	-0.000497032	-0.472017	-0.000723528	0.999432	0.99965	-6.30537
Gm29282	-0.582573	-1.03369	-1.63311	0.122773	0.219868	-5.04201
Gm9530	-0.818049	-1.25097	-2.26042	0.0387193	0.107889	-4.04482
Ier5	-2.66246	4.2653	-2.98486	0.00906425	0.0490318	-2.71715
Mr1	-0.440293	0.69517	-0.715119	0.485264	0.590327	-6.04636
Stx6	0.103127	4.00121	0.43975	0.666243	0.748783	-6.20639
Xpr1	-0.265783	6.37715	-1.51761	0.149425	0.251035	-5.20252
Acbd6	0.111692	6.8704	0.959463	0.352187	0.463979	-5.84526
Qsox1	-0.2577	3.60108	-0.99864	0.333443	0.445382	-5.80814
Gm37571	-0.490911	-1.50261	-2.20872	0.04278	0.114119	-4.13371
Cep350	-0.158156	6.85837	-1.0925	0.291454	0.402304	-5.71398
Tor1aip1	-0.659309	5.85051	-4.66054	0.00028972	0.0119608	0.534085
Tor1aip2	-0.281864	6.78982	-1.47471	0.160494	0.263332	-5.25997
Axdnd1	-0.869087	-1.21171	-2.64201	0.0182103	0.0709316	-3.36162
Gm2000	-0.236376	5.04625	-1.04957	0.310151	0.422065	-5.75795
Soat1	-2.6432	0.914248	-4.52861	0.000377758	0.0130258	0.282373
Abl2	-0.0631092	4.30245	-0.222052	0.827199	0.875516	-6.28001
Tor3a	-1.57787	2.04964	-2.3335	0.0335908	0.0993513	-3.91753
Fam20b	-0.248977	5.05359	-1.47085	0.161522	0.264606	-5.26508
Ralgps2	-0.443217	1.64114	-0.532868	0.60175	0.693456	-6.16048
Rasal2	0.851698	3.70071	2.33214	0.0336798	0.0994742	-3.91991
Cryzl2	-0.401675	0.821174	-0.653789	0.522916	0.62462	-6.08828
Sec16b	-0.35478	-1.60733	-1.40627	0.179554	0.284313	-5.34905
Brinp2	-0.42786	-1.55112	-1.66032	0.117124	0.213333	-5.003
Cop1	-0.330262	6.92367	-2.06222	0.056526	0.135583	-4.37979
Tnr	-0.521884	-1.47879	-1.61799	0.126013	0.223589	-5.06349
Gm37294	0.254295	-1.67744	0.963004	0.350463	0.462316	-5.84196
4930523C07Rik	-0.762016	6.21343	-4.05844	0.000984783	0.0181762	-0.626773
4930562F07Rik	-0.465838	-1.5219	-1.5776	0.135029	0.234257	-5.1202
Mrps14	-0.0891168	7.99622	-0.593877	0.56124	0.658236	-6.12581
Cacybp	0.360131	8.48391	2.17185	0.0459134	0.119144	-4.19646
Rabgap1l	-0.321454	7.71348	-2.00562	0.0628448	0.144072	-4.47242
Gm36975	-1.87971	0.531387	-3.36912	0.00409913	0.03309	-1.97464
Gm37529	-1.70061	0.876848	-2.45335	0.0265386	0.0866936	-3.70489
Gm37328	-1.28594	-0.891054	-3.54124	0.00286867	0.0280267	-1.63848
Gm37083	-0.0194667	-1.25199	-0.0486625	0.961815	0.974705	-6.30415
Rc3h1	0.0551226	6.0661	0.260451	0.797976	0.851216	-6.27051
Serpinc1	-0.3181	0.258577	-0.621694	0.543262	0.642849	-6.10881
Zbtb37	-1.96581	2.04588	-3.12957	0.00672885	0.042044	-2.43933
Gas5	0.105638	8.81661	0.529502	0.604027	0.695161	-6.16228
Dars2	0.339326	4.80356	1.94654	0.0701176	0.153775	-4.56751
Gm37634	-0.75244	-0.42718	-1.50721	0.152047	0.254143	-5.21655
Cenpl	-0.975245	5.40437	-2.85733	0.0117685	0.0560365	-2.95945
Klhl20	-0.137364	3.68684	-0.663421	0.516895	0.619664	-6.08193
Prdx6	0.707625	8.28017	3.52994	0.00293669	0.0283733	-1.66058
Tnfsf4	-0.825371	-1.24534	-2.08344	0.0543112	0.132807	-4.34471
Suco	-1.34049	5.63365	-4.68662	0.000274974	0.0117109	0.583626
4930558K02Rik	0.0189684	-1.49642	0.062143	0.95125	0.967638	-6.30338
Pigc	-1.30704	2.36823	-1.7897	0.093234	0.184145	-4.81162
Gm38304	-0.747337	-1.30536	-2.73275	0.0151617	0.0647023	-3.19333
Eef1aknmt	0.17831	3.42334	0.555051	0.586853	0.681054	-6.14829
Vamp4	-0.0556163	3.40389	-0.209544	0.836777	0.882759	-6.28278
Prrc2c	0.235829	8.33449	2.01267	0.0620237	0.142919	-4.46095
Gorab	-0.153845	2.71027	-0.447443	0.660801	0.744148	-6.20292
Kifap3	-0.990134	2.10582	-1.25249	0.229127	0.337756	-5.53717
Scyl3	0.00165438	4.467	0.0060977	0.995213	0.996693	-6.30535
BC055324	-0.265294	3.79552	-0.903037	0.380451	0.491045	-5.89641
Mettl18	0.545736	2.40824	1.35624	0.194626	0.300851	-5.41212
Sell	-0.0239365	2.88724	-0.0574463	0.95493	0.97005	-6.30367
Selp	0.787083	-0.861718	1.4344	0.171505	0.275035	-5.31282
F5	-1.7123	0.66247	-2.58067	0.0205969	0.0754675	-3.47429
Slc19a2	-0.175823	2.78458	-0.4899	0.631128	0.718926	-6.18272
Ccdc181	-1.596	2.96502	-2.01421	0.0618457	0.142731	-4.45845
Blzf1	0.277658	3.94375	1.04706	0.311269	0.423085	-5.76047
Nme7	-2.24169	3.94079	-2.57774	0.0207181	0.0757617	-3.47964
Atp1b1	-1.32273	-0.464343	-3.96567	0.00119198	0.0198945	-0.807806
Xcl1	-0.69841	-1.343	-2.42223	0.0282217	0.0897197	-3.76054
Sft2d2	-1.22818	1.91251	-1.77781	0.0952353	0.186408	-4.8296
Tiprl	-0.464847	6.00915	-2.58494	0.0204214	0.07529	-3.46647
Gm38190	-2.13151	0.72508	-3.96253	0.00119973	0.0199565	-0.813948
Dcaf6	-0.891482	6.24317	-4.20774	0.000725071	0.0161598	-0.336357
Gm37864	-0.912414	-1.17838	-2.13458	0.0492954	0.125012	-4.25934
Mpc2	-0.407702	7.43444	-2.00897	0.0624538	0.143575	-4.46698
Adcy10	-0.88029	-1.20309	-2.63741	0.0183799	0.0712488	-3.37011
Mpzl1	1.49486	1.28409	3.15795	0.00634601	0.0408398	-2.38456
Rcsd1	0.367684	2.36433	0.591698	0.562662	0.659591	-6.12711
Creg1	-0.179817	9.12668	-1.09899	0.288701	0.399667	-5.7072
Gm16565	-0.868206	-0.599112	-1.73232	0.103244	0.196252	-4.89767
Cd247	-1.07446	-0.440454	-2.04069	0.0588578	0.138906	-4.41519
Pou2f1	-1.16973	5.48867	-3.90965	0.00133798	0.0204725	-0.917299
Gm26665	-0.0104087	-0.248264	-0.0194668	0.984719	0.989728	-6.30518
Gm15853	-0.894501	-0.578886	-1.86657	0.0811713	0.168658	-4.69356
Tada1	0.264864	4.73291	1.32805	0.203559	0.310322	-5.44687
Pogk	1.12921	1.06994	1.92953	0.0723486	0.156852	-4.59459
Uck2	0.479205	6.68231	2.48805	0.0247748	0.0835847	-3.6425
Gm37982	-0.185941	0.0654809	-0.365347	0.719835	0.791973	-6.23692
Gm2453	-0.431252	-0.935231	-1.04187	0.313594	0.42562	-5.76568
Tmco1	-0.474227	6.92294	-2.50761	0.0238301	0.0816182	-3.60717
Aldh9a1	0.00357682	5.50243	0.0254263	0.980042	0.986432	-6.30504
Mgst3	-2.29368	9.27412	-4.15368	0.000809929	0.0168832	-0.441364
Pbx1	-2.52958	2.33363	-4.32837	0.000566868	0.0146368	-0.102783
Nuf2	-0.714589	6.33233	-3.38322	0.00398103	0.0326134	-1.94715
Hsd17b7	-1.44011	2.18468	-2.09215	0.0534251	0.131412	-4.33025
3110045C21Rik	-1.53351	1.10207	-2.80913	0.0129835	0.0592245	-3.0503
Uap1	-0.27449	5.75238	-1.64529	0.120217	0.21694	-5.02461
Gm37748	-0.0597791	-1.43584	-0.183763	0.856603	0.897541	-6.28799
Uhmk1	-0.127076	5.22763	-0.612159	0.549389	0.648339	-6.11472
Sh2d1b1	-0.778827	-0.519883	-1.47038	0.161646	0.264753	-5.26569
Gm7694	-1.5302	-0.0898854	-2.96046	0.00952971	0.0501918	-2.76371
Nos1ap	-2.95034	3.81802	-3.74035	0.00189871	0.0234344	-1.24865
Olfml2b	-1.59539	-0.254602	-4.14797	0.000819464	0.0169627	-0.452466
Atf6	-0.490243	5.93581	-2.50753	0.023834	0.0816182	-3.60731
Gm9929	-2.24248	0.458022	-5.31374	8.01394e-05	0.00843653	1.75039
Dusp12	0.968671	3.68288	2.99181	0.00893577	0.0486645	-2.70386
Gm26620	-0.564975	-0.118799	-1.03454	0.316897	0.429003	-5.77298
Fcrla	-0.923607	0.632916	-1.76484	0.0974614	0.188993	-4.84913
Fcgr2b	-1.81308	1.31713	-3.32028	0.00453573	0.0345981	-2.06976
Fcgr4	-1.72247	0.373166	-2.90388	0.0107007	0.0531483	-2.87131
Fcgr3	-1.62816	1.98148	-2.43775	0.0273702	0.0882816	-3.73283
Cfap126	-1.83163	1.3314	-3.35525	0.00421871	0.0334615	-2.00168
Sdhc	-0.12384	6.90664	-0.74578	0.467061	0.573277	-6.02409
Mpz	-0.139311	-1.37466	-0.441996	0.664652	0.747406	-6.20539
Pcp4l1	-0.484366	-1.50765	-1.675	0.11417	0.209757	-4.98177
Tomm40l	-0.344235	4.0079	-1.43404	0.171606	0.275132	-5.31328
Apoa2	-0.131038	-0.237736	-0.27881	0.784109	0.840599	-6.26543
Fcer1g	-0.454866	5.62826	-1.72403	0.104765	0.198181	-4.90995
Ndufs2	-0.143933	6.50228	-0.723671	0.480145	0.585602	-6.04024
B4galt3	-2.05288	3.35866	-2.58878	0.0202649	0.0749929	-3.45944
Ppox	-1.23725	6.22009	-3.50469	0.00309459	0.0290652	-1.70997
Usp21	-0.36319	3.72133	-1.5466	0.142313	0.242472	-5.16302
Ufc1	0.331416	6.63489	2.26564	0.0383299	0.107277	-4.03579
Gm20045	-1.36254	1.26318	-2.33972	0.0331848	0.098701	-3.9066
Dedd	-0.346466	3.96833	-1.54753	0.14209	0.242293	-5.16175
Nit1	-0.604582	4.17543	-2.80998	0.012961	0.0592092	-3.0487
Pfdn2	0.29927	7.49764	1.50316	0.153079	0.255235	-5.222
Klhdc9	-0.854184	-0.609899	-1.83424	0.0860641	0.174774	-4.74359
Arhgap30	0.0706298	2.66844	0.192837	0.849613	0.892804	-6.28624
Usf1	0.212375	3.45993	0.847975	0.409473	0.518656	-5.94364
Tstd1	-0.581849	-1.43266	-1.81723	0.0887432	0.178498	-4.7697
F11r	-0.881542	-1.20213	-2.77595	0.0138896	0.061724	-3.11258
B930036N10Rik	-0.341307	2.75461	-0.654827	0.522266	0.624333	-6.0876
Alyref2	-1.17816	1.4608	-1.73005	0.103659	0.196717	-4.90104
Cd244a	-1.75927	0.0863183	-3.96749	0.00118753	0.0198483	-0.804259
Ly9	-0.822741	0.646762	-1.35388	0.195361	0.301735	-5.41505
Slamf7	-1.85762	0.161976	-3.78727	0.00172298	0.0228231	-1.15676
Cd48	0.91611	4.44371	1.94799	0.0699306	0.153547	-4.5652
Slamf1	-1.14717	-0.599388	-2.25539	0.0390977	0.108413	-4.0535
Cd84	-1.32305	1.23731	-2.24136	0.0401727	0.110208	-4.07771
Slamf6	-0.843058	-1.23173	-2.77474	0.0139239	0.0617601	-3.11485
Vangl2	-0.509523	-1.4883	-1.66207	0.116768	0.212947	-5.00048
Ncstn	0.0312068	4.18265	0.15802	0.8765	0.912454	-6.29252
Copa	0.155927	5.66578	1.21796	0.241621	0.351084	-5.57702
Pex19	-2.3658	3.87876	-2.84416	0.0120892	0.0570979	-2.98432
Dcaf8	-0.295617	6.81656	-1.90453	0.0757436	0.161455	-4.63413
Pea15a	-0.59286	-0.0973489	-1.25949	0.226657	0.335157	-5.52898
Igsf8	0.243377	3.50487	0.803867	0.43374	0.54168	-5.97952
Kcnj10	-0.574753	-1.43812	-1.73344	0.10304	0.196002	-4.896
Pigm	-2.13929	3.20903	-2.83096	0.0124188	0.0578073	-3.0092
Slamf9	-0.405857	-1.56804	-1.68777	0.111652	0.206643	-4.9632
Tagln2	0.941658	7.43278	2.94348	0.00986718	0.0509552	-2.79604
4933439K11Rik	0.247998	-1.45773	0.722397	0.480906	0.586385	-6.04115
Slamf8	-0.595208	-0.493957	-1.15261	0.266695	0.377597	-5.64991
Dusp23	0.252482	0.336507	0.316983	0.755524	0.819258	-6.25378
Fcer1a	-1.23232	-0.9323	-2.95563	0.00962461	0.0504229	-2.77292
Ackr1	-4.15555	5.4935	-4.1846	0.00076023	0.016489	-0.381284
Cadm3	-1.42198	-0.387994	-4.5189	0.000385229	0.0130258	0.263791
Aim2	-1.79638	5.35849	-5.29032	8.38431e-05	0.00843653	1.70775
Ifi206	1.51793	-1.25019	1.94897	0.0698049	0.153433	-4.56364
Ifi214	-0.397624	-1.57437	-1.79871	0.0917429	0.182317	-4.79795
Ifi213	-0.647325	-1.3823	-2.25971	0.0387726	0.107899	-4.04605
Ifi209	-1.18166	0.254288	-1.78111	0.0946764	0.185909	-4.82462
Ifi207	-1.67417	0.0208607	-3.47461	0.00329377	0.0299193	-1.76876
Ifi204	-1.87286	-0.0411653	-4.02852	0.00104728	0.0187373	-0.685118
Mndal	-1.10063	1.77172	-1.51847	0.14921	0.250816	-5.20136
Ifi211	-1.49967	-0.726649	-3.75257	0.00185128	0.0231898	-1.22472
Ifi203	0.348262	1.54368	0.63027	0.537783	0.638098	-6.10342
Ifi205	-0.839518	0.455232	-1.42528	0.174081	0.278024	-5.32463
Spta1	-1.63172	7.96988	-5.43731	6.32116e-05	0.00843653	1.97415
Olfr417	0.840332	-0.687819	1.52286	0.148116	0.249384	-5.19542
Fh1	0.14824	5.57267	1.12479	0.27795	0.388741	-5.67992
Kmo	-0.474451	-0.188432	-0.991183	0.336955	0.448858	-5.81531
Opn3	-0.179743	-0.0522873	-0.300762	0.767629	0.828807	-6.25891
Chml	-1.75482	1.9307	-2.6414	0.0182328	0.0710004	-3.36275
Exo1	-0.153848	5.79635	-1.02264	0.322315	0.433724	-5.78476
Rbm8a2	-1.10462	-0.269272	-2.44501	0.02698	0.0874417	-3.71983
Cep170	-0.094695	4.77958	-0.539156	0.597508	0.69009	-6.15707
Sdccag8	-8.67201e-05	4.04769	-0.000292758	0.99977	0.999838	-6.30537
Akt3	-0.751184	5.0578	-2.76883	0.0140919	0.0621339	-3.12591
Gm26801	-0.857501	-1.22062	-2.80539	0.0130827	0.059588	-3.05734
Zbtb18	-1.42122	2.25904	-2.01364	0.0619121	0.142795	-4.45938
Adss	0.228763	6.61729	1.61194	0.12733	0.225387	-5.07205
Catspere2	-0.696652	-0.945938	-1.82512	0.0874921	0.176593	-4.75762
Desi2	0.622965	5.55366	3.63173	0.00237786	0.0254457	-1.46136
B230369F24Rik	-2.06024	1.24627	-4.11556	0.000875793	0.0173401	-0.515529
Cox20	-0.364236	6.22537	-1.48738	0.157154	0.259634	-5.24312
Hnrnpu	0.0236755	9.30905	0.162369	0.873132	0.909778	-6.2918
Efcab2	-1.43271	2.95556	-1.74202	0.101488	0.194104	-4.88324
Kif26b	-0.880007	-1.20331	-2.4677	0.0257953	0.0856248	-3.67913
Smyd3	0.322899	5.16476	1.19375	0.250688	0.360899	-5.60441
Tfb2m	0.658137	4.71358	3.38379	0.00397634	0.0325959	-1.94604
Cnst	-0.498069	4.36016	-2.12764	0.0499503	0.125925	-4.271
Sccpdh	0.579038	-0.387532	0.817313	0.426247	0.535146	-5.96877
Kif28	-1.06116	-0.450687	-2.33678	0.0333761	0.0990345	-3.91177
Ahctf1	0.324901	7.1076	2.60507	0.0196137	0.0735748	-3.42959
Cdc42bpa	-3.0475	5.63237	-2.80992	0.0129627	0.0592092	-3.04883
Coq8a	-1.30376	-0.877346	-4.68189	0.00027759	0.0117324	0.574648
Psen2	0.951701	5.90874	3.31679	0.00456866	0.0347687	-2.07655
Gm31728	-1.31243	0.00358359	-2.37065	0.0312352	0.0951371	-3.85212
Itpkb	0.970095	2.00804	1.93047	0.0722246	0.156727	-4.59311
Parp1	0.252261	7.24583	1.87422	0.0800502	0.16716	-4.68164
Lin9	-0.245278	5.76594	-1.18788	0.252927	0.36335	-5.61098
Acbd3	-0.283126	5.53808	-2.30016	0.0358459	0.10341	-3.97583
Gm37768	-0.841543	-0.619622	-1.77963	0.0949274	0.18615	-4.82686
H3f3a	-0.850717	11.3579	-2.96361	0.00946831	0.0501104	-2.7577
H3f3aos	-1.06064	-0.0986648	-1.78202	0.0945229	0.185774	-4.82325
Sde2	-0.384932	5.36807	-2.26988	0.0380163	0.106817	-4.02845
Pycr2	-0.0556685	7.27034	-0.318912	0.754089	0.818122	-6.25316
Lefty1	-0.533702	4.63787	-2.32414	0.0342104	0.100457	-3.93395
Tmem63a	-2.03269	3.10926	-2.66972	0.0172218	0.0687433	-3.31044
Ephx1	-0.515645	-1.48359	-2.17742	0.0454268	0.118242	-4.18702
Nvl	-0.401293	6.22671	-2.38473	0.0303836	0.0936985	-3.8272
Cnih4	-0.240529	6.6745	-1.37999	0.187348	0.293023	-5.3824
Wdr26	-1.17355	6.95227	-4.31989	0.000576731	0.0146841	-0.119154
A430110L20Rik	-0.189246	-1.12139	-0.380173	0.709023	0.784015	-6.23128
Cnih3	-0.642548	-1.38597	-2.97524	0.0092449	0.049458	-2.7355
Dnah14	-1.22612	-0.93707	-2.95415	0.00965386	0.0505013	-2.77574
Lbr	-1.1715	7.81826	-4.99479	0.00014916	0.00966062	1.16318
Enah	-0.622222	-1.00319	-1.52573	0.147402	0.248566	-5.19151
Srp9	-0.337501	7.57036	-1.83442	0.0860371	0.174774	-4.74332
Degs1	-0.219022	5.20503	-0.731072	0.475741	0.581083	-6.03488
1700047M11Rik	-0.674675	-0.0344137	-1.41779	0.176221	0.280534	-5.33428
Fbxo28	0.206086	4.61111	1.17838	0.256578	0.367095	-5.62155
Trp53bp2	0.387122	3.30089	1.34158	0.199233	0.305739	-5.43027
Capn2	-0.445524	-0.210684	-0.957377	0.353205	0.465058	-5.8472
Disp1	-1.34625	2.89517	-1.62008	0.125562	0.223029	-5.06054
Brox	-0.863088	4.54205	-3.7937	0.00170021	0.0227819	-1.14417
Aida	-2.8293	4.81175	-2.97682	0.00921511	0.0494307	-2.7325
Mia3	-0.210919	5.60892	-1.48344	0.158186	0.26073	-5.24837
Taf1a	1.17491	2.63052	2.99135	0.0089442	0.0486645	-2.70474
Dusp10	-2.62334	1.35649	-4.23777	0.000681906	0.0155594	-0.278118
1700056E22Rik	-1.36991	-0.82646	-4.37865	0.000511768	0.0142723	-0.00574364
Hlx	-1.15856	-0.0606123	-1.99764	0.0637856	0.145219	-4.48536
Gm34342	-0.371751	-1.59428	-1.6807	0.113039	0.208326	-4.97349
Marc2	0.260237	7.12985	1.88346	0.0787144	0.165573	-4.6672
Rab3gap2	-0.257204	5.08354	-1.41147	0.178043	0.282616	-5.3424
Iars2	-0.0798334	5.602	-0.415951	0.683199	0.762949	-6.21676
Bpnt1	-1.05507	1.1994	-1.65709	0.117782	0.214136	-5.00765
4930532G15Rik	-1.55475	0.0769826	-3.33386	0.00440992	0.0341121	-2.04333
Eprs	0.402637	8.04893	2.89353	0.0109298	0.0537818	-2.89095
Gm2061	-0.95367	-1.14665	-2.57748	0.0207287	0.0757632	-3.48011
Slc30a10	-2.88463	1.3044	-3.22366	0.00554004	0.0378816	-2.2574
Tgfb2	0.59113	-0.710986	1.01419	0.326205	0.437766	-5.79305
Rrp15	0.87072	5.9194	3.08898	0.00731638	0.0441335	-2.51752
A430105J06Rik	0.916033	0.539651	1.35876	0.193844	0.300142	-5.40899
Spata17	-0.105056	-1.03817	-0.25843	0.799506	0.852358	-6.27104
Gpatch2	-1.6876	3.33975	-2.00564	0.0628418	0.144072	-4.47238
Ush2a	-0.34865	-1.61205	-1.48095	0.158841	0.261212	-5.25168
Kctd3	-0.403359	3.99676	-2.01433	0.0618322	0.142727	-4.45826
Kcnk2	-1.22887	0.95917	-2.16633	0.0463998	0.119828	-4.2058
Cenpf	-1.36896	8.16102	-3.90283	0.00135694	0.0205426	-0.930626
Ptpn14	2.24269	1.54991	3.49489	0.00315813	0.0293524	-1.72913
Smyd2	1.23565	4.71819	3.63396	0.00236691	0.0253651	-1.45699
Rps6kc1	0.515775	3.14272	1.86821	0.08093	0.168393	-4.69101
Angel2	0.101348	5.5971	0.711887	0.487208	0.591926	-6.04866
Flvcr1	0.656577	3.79397	2.70238	0.0161228	0.0664134	-3.24987
A230020J21Rik	-0.821096	-1.24863	-2.24393	0.0399736	0.109916	-4.07328
Tatdn3	-1.54524	2.9815	-1.93217	0.0719983	0.156556	-4.5904
Nsl1	-0.166985	4.22069	-0.518198	0.611704	0.701925	-6.16827
Batf3	-1.36818	0.10064	-2.63449	0.0184881	0.0713861	-3.37549
Atf3	-0.804106	0.280009	-1.59539	0.130992	0.229565	-5.09534
D730003I15Rik	0.434888	2.01768	0.887129	0.38869	0.498897	-5.91033
Nenf	-0.284293	6.32822	-1.38804	0.184932	0.290276	-5.37224
Pacc1	-1.86803	2.51385	-2.76935	0.014077	0.0621339	-3.12494
Ppp2r5a	-0.246172	6.40082	-1.9116	0.0747693	0.160254	-4.62298
Dtl	-0.557435	7.35931	-2.82246	0.0126359	0.058425	-3.02522
Ints7	-0.0855891	6.29057	-0.532127	0.602251	0.693764	-6.16088
Lpgat1	-0.0168525	1.90133	-0.0328324	0.974231	0.982259	-6.30482
Gm38037	-2.34467	1.18897	-3.46747	0.00334292	0.0301005	-1.78271
Nek2	-0.888166	4.98861	-4.06395	0.000973697	0.0180842	-0.616036
1700034H15Rik	-1.70133	-0.57152	-5.82151	3.06187e-05	0.00709063	2.65554
Slc30a1	-0.210232	3.25782	-0.529281	0.604177	0.695225	-6.1624
Gm26670	0.217253	-0.0764372	0.389744	0.702077	0.778562	-6.22752
Traf5	-0.483107	4.32566	-2.38486	0.0303757	0.0936936	-3.82696
Gm26879	-1.59098	-0.257996	-3.57401	0.00268021	0.0271335	-1.57437
Rcor3	0.0326126	4.78938	0.125434	0.901807	0.932654	-6.29727
Gm10516	-1.38806	1.67867	-2.21307	0.0424237	0.113517	-4.12627
Hhat	0.112703	-1.09267	0.216568	0.831396	0.878833	-6.28125
Syt14	-0.732436	-0.208132	-0.912775	0.375466	0.486128	-5.88778
Utp25	0.593902	4.00026	1.97118	0.0669971	0.149701	-4.52806
A130010J15Rik	-0.827317	1.78298	-1.11306	0.2828	0.393778	-5.69239
Traf3ip3	-0.149536	0.998169	-0.189398	0.852261	0.89447	-6.28691
Lamb3	-0.471666	-1.119	-1.07064	0.300867	0.412121	-5.73656
Hsd11b1	-1.62476	1.20841	-2.59902	0.0198532	0.0740983	-3.44068
G0s2	-1.10117	1.37778	-1.45491	0.165826	0.26916	-5.28606
Plxna2	-0.569005	2.94958	-1.26616	0.224325	0.332771	-5.52115
Cd34	-0.217241	-0.386286	-0.405575	0.690649	0.769632	-6.2211
Gm16897	-0.318466	-1.63526	-1.32402	0.204864	0.311798	-5.4518
A330023F24Rik	-2.94008	1.88769	-3.9513	0.00122782	0.0201175	-0.835881
Gm32250	-0.699901	-0.943439	-2.02311	0.0608269	0.141392	-4.44395
Cd46	-2.18927	2.94746	-3.04579	0.0079971	0.0462339	-2.6005
Cr1l	-0.821401	6.67349	-3.1681	0.0062143	0.0402702	-2.36494
Nmt2	0.620925	5.21082	2.06804	0.0559099	0.13476	-4.37018
Rpp38	-1.62243	3.22622	-1.85843	0.0823797	0.170191	-4.70621
Acbd7	-0.707568	0.466732	-1.28362	0.218304	0.326487	-5.50048
Dclre1c	-0.391984	4.05802	-2.00279	0.0631765	0.144487	-4.477
Suv39h2	-0.450391	4.5891	-2.17086	0.0460002	0.119195	-4.19813
Gm13184	-1.17048	-0.979872	-3.17103	0.00617681	0.0401344	-2.35928
Hspa14	-0.189672	7.17009	-1.52423	0.147774	0.249044	-5.19354
Gm45902	-2.3685	1.2073	-3.6191	0.00244097	0.0257996	-1.4861
Cdnf	-0.878913	0.634677	-1.46261	0.163735	0.267004	-5.27594
Fam107b	-2.22908	4.06839	-2.49475	0.0244471	0.082969	-3.6304
Frmd4a	-1.09939	4.99709	-4.78244	0.000227093	0.011367	0.765017
Prpf18	-0.521645	5.29707	-2.95873	0.00956357	0.0502315	-2.767
Sephs1	-0.423637	5.01351	-2.70662	0.015985	0.0661982	-3.24198
Phyh	-1.21848	2.20491	-1.65538	0.118131	0.21464	-5.01011
Mcm10	-0.831611	6.17205	-3.24951	0.00525157	0.0369755	-2.20728
Optn	-0.511501	6.09106	-2.37969	0.0306858	0.0941796	-3.83612
4930551O13Rik	-0.662634	-0.972106	-1.75434	0.0992962	0.191449	-4.86486
Camk1d	-0.524525	6.5515	-2.14304	0.0485082	0.123466	-4.24512
Cdc123	-0.424854	7.48095	-2.42131	0.0282727	0.0898051	-3.76218
Nudt5	-0.0834293	7.12924	-0.653645	0.523007	0.62462	-6.08838
Gm13199	-0.566412	-1.04612	-1.59812	0.130383	0.229066	-5.09152
Sec61a2	0.487479	3.90664	2.15921	0.0470354	0.120919	-4.21785
Gm13267	0.154309	-1.60052	0.563651	0.581129	0.676318	-6.14343
Dhtkd1	-0.720077	0.476354	-1.31637	0.207355	0.314652	-5.4611
Upf2	-0.179819	5.80746	-1.15946	0.263976	0.375217	-5.64242
A230108P19Rik	-1.96752	0.24651	-3.88155	0.00141789	0.0209726	-0.972249
Usp6nl	-1.4547	6.09648	-3.79335	0.00170146	0.0227819	-1.14487
Celf2	-1.72107	3.4615	-1.9389	0.0711129	0.155161	-4.5797
Gata3	-0.485785	-1.10814	-1.23127	0.236744	0.345728	-5.56177
Taf3	-0.377864	5.98388	-2.6356	0.0184468	0.0713414	-3.37345
Atp5c1	0.0736387	8.72017	0.482473	0.636274	0.72362	-6.18638
Kin	-0.508434	6.39949	-2.89098	0.0109868	0.0538834	-2.89578
Itih5	0.165615	-0.209948	0.190266	0.851593	0.894188	-6.28674
Sfmbt2	-0.389522	-1.18219	-1.28333	0.218403	0.326537	-5.50083
Prkcq	-1.49471	1.98567	-1.86744	0.081043	0.168557	-4.69221
Pfkfb3	-0.695509	1.30317	-0.930217	0.36665	0.477766	-5.87212
Rbm17	0.270189	6.76614	1.86709	0.0810938	0.168568	-4.69274
Il2ra	-0.302611	-1.24905	-0.605443	0.553726	0.651797	-6.11883
Il15ra	0.512604	1.49406	1.01376	0.3264	0.437878	-5.79346
Fbh1	-1.6531	2.18295	-2.45403	0.0265032	0.0866544	-3.70368
Ankrd16	-1.58394	2.20992	-2.30378	0.0355942	0.103177	-3.96952
Itga8	-0.61986	-1.40342	-2.12078	0.0506053	0.126929	-4.28249
Mindy3	-0.800221	5.16406	-2.91133	0.0105388	0.0527156	-2.85717
Pter	0.761757	2.81688	2.55649	0.0216174	0.0775014	-3.51842
Rsu1	0.39898	5.66706	2.61135	0.0193677	0.0731135	-3.41804
Gm13270	-1.10129	-1.03309	-3.78614	0.00172701	0.0228231	-1.15897
Trdmt1	-1.15823	1.72684	-1.73214	0.103277	0.196269	-4.89794
Vim	-0.045638	5.04288	-0.131406	0.89716	0.929197	-6.29648
St8sia6	0.266	-1.15642	0.524002	0.607757	0.698477	-6.16521
Hacd1	0.459776	6.09544	2.9143	0.010475	0.0525913	-2.85153
Stamos	-0.033189	0.336539	-0.0583444	0.954227	0.969598	-6.30362
Stam	-2.9033	4.41984	-3.36379	0.00414467	0.0332223	-1.98503
Tmem236	-0.552766	-1.45503	-1.74301	0.101312	0.193973	-4.88178
Mrc1	-1.51638	-0.713795	-4.2545	0.000659	0.0154542	-0.245696
Cacnb2	-2.17024	0.187593	-4.82196	0.000209924	0.0110001	0.839524
Nsun6	-1.88622	3.01726	-2.48991	0.0246834	0.0833333	-3.63914
Arl5b	0.194103	3.05742	0.720024	0.482324	0.587679	-6.04286
Plxdc2	-1.37445	0.402588	-2.10434	0.0522068	0.129521	-4.30995
Nebl	-0.512767	-1.08739	-1.36956	0.190516	0.296446	-5.3955
1810059C17Rik	-0.992048	-0.71871	-2.29599	0.0361378	0.103838	-3.9831
Mllt10	-0.101009	7.22928	-0.874725	0.395196	0.505149	-5.92103
Dnajc1	0.260753	5.67304	2.00194	0.0632762	0.144569	-4.47838
Commd3	0.08421	7.07147	0.426413	0.675723	0.756869	-6.21227
Bmi1	0.564707	3.7417	2.20518	0.0430713	0.114542	-4.13974
Pip4k2a	-0.206069	6.98598	-1.37645	0.18842	0.294048	-5.38686
4930426L09Rik	0.578523	-0.998412	1.45141	0.166785	0.270294	-5.29065
Armc3	-1.34488	-0.845713	-3.65277	0.00227641	0.0248626	-1.42016
Msrb2	0.494545	3.41945	1.91705	0.0740257	0.159259	-4.61436
Otud1	-0.808468	-0.497082	-1.43735	0.170678	0.274273	-5.30899
Arhgap21	-0.395096	6.17224	-2.19448	0.0439654	0.11595	-4.158
Gm13380	-0.367484	-1.59756	-1.41458	0.177144	0.28155	-5.3384
Gm13375	-0.292426	-1.25688	-0.863644	0.40107	0.510832	-5.93047
Enkur	-0.403601	-1.56978	-1.66881	0.115408	0.211366	-4.99074
Thnsl1	-0.0100911	0.148639	-0.0161999	0.987283	0.991632	-6.30524
1700092C17Rik	0.429045	-0.520586	0.981834	0.341395	0.453064	-5.82422
Apbb1ip	0.504897	7.89152	3.65961	0.00224436	0.0247812	-1.40677
Pdss1	0.278337	5.4393	1.84542	0.0843428	0.172754	-4.72635
Abi1	-0.302277	6.01423	-2.15971	0.046991	0.120908	-4.21701
Acbd5	0.0944485	4.58116	0.413899	0.68467	0.764233	-6.21762
Mastl	-0.499418	5.38833	-2.24527	0.0398707	0.109756	-4.07098
Yme1l1	-0.404479	6.45306	-3.3645	0.00413859	0.0332223	-1.98365
4931423N10Rik	-0.468866	-0.906297	-1.09485	0.290456	0.401422	-5.71153
Spopl	-0.795694	5.72981	-3.45014	0.00346524	0.0306341	-1.81656
Hnmt	1.17532	-0.37337	1.50846	0.15173	0.253842	-5.21487
Il1f9	-1.44537	-0.155142	-3.35251	0.00424275	0.0334834	-2.00702
Il1rn	-1.52336	-0.310006	-3.76965	0.00178696	0.0231104	-1.19127
Psd4	0.464597	3.6988	1.93628	0.0714558	0.155788	-4.58386
Pax8	0.170228	-1.61277	0.607292	0.55253	0.650854	-6.1177
Ehmt1	0.243506	6.23844	2.08266	0.0543912	0.132893	-4.346
Arrdc1	-1.90233	2.97723	-2.55902	0.0215082	0.0772704	-3.5138
Zmynd19	0.0555546	6.30603	0.506037	0.620016	0.709266	-6.17458
Dph7	1.00692	3.74963	3.2555	0.00518685	0.0368208	-2.19565
Mrpl41	-0.13601	6.6134	-0.884445	0.390091	0.500177	-5.91265
Pnpla7	-1.90709	3.59679	-2.2359	0.0405984	0.11073	-4.0871
Nsmf	0.923262	1.04608	1.66388	0.1164	0.21259	-4.99786
Gm13387	0.637045	-0.572587	0.76588	0.455357	0.562227	-6.00901
Nrarp	0.630519	3.26371	2.2721	0.0378537	0.10666	-4.02461
Gm38287	-0.443903	-1.53877	-1.33819	0.20031	0.306948	-5.43444
Tor4a	1.71734	0.878518	3.23265	0.00543794	0.0376616	-2.23997
Nelfb	0.169231	4.82867	0.962664	0.350629	0.46246	-5.84228
Fam166a	0.0941884	-1.55428	0.364727	0.720288	0.792296	-6.23715
Tubb4b	-0.118454	9.91672	-0.516025	0.613185	0.703135	-6.16941
Rnf208	-0.376218	-1.59084	-1.42343	0.174607	0.278543	-5.32701
Ndor1	0.174874	3.12321	0.574816	0.57374	0.669612	-6.13702
Tmem203	0.00241764	3.94291	0.0093619	0.992651	0.994933	-6.30533
Tprn	0.771277	3.0514	1.83921	0.085295	0.173927	-4.73593
Ssna1	-0.0965115	7.75258	-0.564111	0.580823	0.676228	-6.14317
Anapc2	-0.942927	4.49161	-4.19628	0.00074227	0.0164197	-0.3586
Grin1	-0.673824	-0.433483	-1.19389	0.250635	0.360899	-5.60425
Man1b1	0.216451	3.83007	0.939886	0.361824	0.473309	-5.86332
Dpp7	-0.854687	0.96846	-1.41546	0.17689	0.281298	-5.33727
Uap1l1	-0.138151	0.808228	-0.195876	0.847275	0.891254	-6.28563
Sapcd2	0.96439	3.22494	2.19297	0.0440931	0.116099	-4.16057
Fut7	0.0512465	-0.991229	0.101278	0.92064	0.946439	-6.30009
Abca2	-1.4996	-0.113422	-3.33994	0.00435468	0.0339509	-2.03149
Paxx	0.498345	3.06281	2.00294	0.0631585	0.144487	-4.47676
C8g	-1.38846	0.153497	-2.57021	0.0210324	0.0763424	-3.49339
Fbxw5	-0.108662	4.33685	-0.539062	0.597572	0.69009	-6.15712
Traf2	-1.69709	3.40914	-1.98861	0.0648647	0.146527	-4.49996
Edf1	-0.306925	7.82454	-2.25276	0.0392973	0.108763	-4.05805
Mamdc4	-0.602381	-1.41687	-2.72024	0.0155507	0.0653819	-3.21665
Phpt1	-1.97841	2.27339	-2.9065	0.0106436	0.0529714	-2.86635
Rabl6	-0.646457	5.40978	-1.9911	0.0645661	0.146142	-4.49594
Tmem141	-0.429709	0.252995	-0.778625	0.448031	0.555485	-5.99926
Fcna	-0.258724	0.121468	-0.400537	0.694277	0.772298	-6.22317
Bmyc	-0.192871	0.550222	-0.313478	0.758134	0.821248	-6.25491
Camsap1	-0.0948697	4.63586	-0.522019	0.609104	0.699808	-6.16626
Ubac1	-1.17219	8.99866	-4.39676	0.00049329	0.0141348	0.029156
Nacc2	-0.0614858	0.726003	-0.0822044	0.935546	0.956455	-6.30189
Tmem250-ps	-2.06313	3.81655	-2.38062	0.0306301	0.0940879	-3.83449
1810012K08Rik	0.0155548	-0.268235	0.0262868	0.979367	0.986081	-6.30501
Qsox2	0.303777	2.78108	0.981149	0.341723	0.453458	-5.82488
Gpsm1	-0.751085	-1.30248	-2.14213	0.0485928	0.123575	-4.24666
Dnlz	0.120842	4.45565	0.783688	0.445141	0.552549	-5.99535
Card9	-1.61412	-0.240194	-3.59106	0.0025871	0.0266644	-1.54099
Gm13562	-0.0291769	-1.45938	-0.0977304	0.92341	0.948366	-6.30045
Snapc4	-1.34331	2.65309	-1.682	0.112783	0.207987	-4.9716
Gm13563	-0.177494	-1.13043	-0.421321	0.679358	0.759853	-6.21447
Entr1	-0.164412	5.58695	-1.05952	0.30574	0.417394	-5.74789
Pmpca	-0.777358	5.21139	-2.96351	0.0094703	0.0501104	-2.7579
Inpp5e	-1.91665	1.48823	-3.61642	0.00245456	0.025862	-1.49134
Sec16a	0.407003	3.68876	1.58569	0.133179	0.232135	-5.10892
0610009E02Rik	-0.102828	-0.474296	-0.219882	0.828859	0.876902	-6.2805
Notch1	-1.98929	0.0483985	-4.56506	0.000350996	0.0128765	0.352088
Egfl7	0.974365	5.51954	3.46392	0.0033676	0.0302126	-1.78964
Agpat2	1.04317	3.15697	2.54462	0.0221358	0.0784492	-3.54003
Dipk1b	-0.66049	-0.973755	-1.27651	0.220739	0.328835	-5.50893
Surf6	0.113217	3.67173	0.380501	0.708784	0.78383	-6.23115
Med22	-1.98025	3.39985	-2.46328	0.0260222	0.0860499	-3.68707
Rpl7a	-0.139462	10.9227	-0.876385	0.394321	0.504248	-5.9196
Surf1	-2.22488	4.14573	-2.43985	0.0272569	0.0880886	-3.72907
Surf2	0.489399	5.1238	1.63077	0.12327	0.220517	-5.04534
Surf4	0.34394	5.55187	1.89474	0.0771118	0.163525	-4.64953
Rexo4	0.447111	5.13873	2.56052	0.0214441	0.0771039	-3.51108
Adamts13	-1.3089	-0.474979	-2.83105	0.0124165	0.0578073	-3.00903
Cacfd1	1.47456	2.66177	3.70874	0.00202712	0.0237739	-1.31054
Slc2a6	-0.700428	-0.943034	-1.8089	0.0900815	0.180107	-4.78243
Vav2	-0.60216	1.23136	-0.857198	0.404512	0.514087	-5.93591
Brd3	-0.133345	5.72918	-0.727227	0.478026	0.583401	-6.03767
Wdr5	0.227917	5.1896	1.48253	0.158426	0.26095	-5.24958
Gm13421	-1.87182	0.602115	-3.1556	0.00637684	0.0408995	-2.38909
Rxra	-0.792267	-1.2708	-3.3631	0.00415061	0.033252	-1.98638
Col5a1	0.462996	5.71822	1.28058	0.219342	0.327544	-5.5041
Gm13372	-0.662393	-0.496448	-1.18482	0.254098	0.364498	-5.61439
Fcnb	-0.45399	4.20214	-1.09861	0.288862	0.399801	-5.7076
F730016J06Rik	-2.1838	0.198021	-5.46144	6.03638e-05	0.00843653	2.01759
Olfm1	-1.55704	0.0787414	-2.92167	0.0103182	0.0521222	-2.83754
Gm13373	-0.456707	-1.52893	-1.32514	0.204502	0.311407	-5.45044
Mrps2	0.869194	3.7795	2.9173	0.0104109	0.052376	-2.84584
Ralgds	-0.39842	-1.57376	-1.43392	0.17164	0.275132	-5.31344
Gm13381	-0.548169	-1.45857	-1.79913	0.091673	0.182203	-4.7973
Gtf3c5	0.43543	4.13565	1.82894	0.0868907	0.175666	-4.75174
Gfi1b	0.0204858	7.16707	0.110425	0.913502	0.940928	-6.29909
Tsc1	-2.2168	3.63734	-2.73033	0.0152363	0.0648713	-3.19785
Spaca9	-0.735291	-0.916216	-2.30083	0.0357991	0.10341	-3.97466
Ak8	-1.00933	-1.10383	-3.69024	0.00210632	0.0240587	-1.34677
Gtf3c4	-2.01905	3.59194	-2.41852	0.0284289	0.0901079	-3.76716
Ddx31	0.894289	3.27998	2.25828	0.0388801	0.108037	-4.04852
Cfap77	-1.3866	-0.415206	-3.30554	0.00467637	0.0352536	-2.09843
Ttf1	-0.47728	4.80924	-1.91269	0.0746207	0.160077	-4.62127
Gm13393	-0.535679	-1.46818	-1.72643	0.104324	0.197671	-4.9064
Setx	-0.194277	5.68687	-1.34774	0.197286	0.30398	-5.42266
Ntng2	1.10754	0.392342	1.49727	0.154589	0.256857	-5.2299
6530402F18Rik	-0.467695	-0.592044	-0.899659	0.382191	0.492561	-5.89938
Med27	0.222337	5.38001	1.60585	0.128667	0.227111	-5.08064
Gm13402	0.388934	-0.340589	0.631698	0.536874	0.637274	-6.10252
Rapgef1	-0.451717	4.9408	-1.60481	0.128896	0.227301	-5.0821
Trub2	0.628044	4.27364	2.08323	0.0543323	0.132837	-4.34505
Coq4	-1.61717	3.20868	-1.95317	0.0692653	0.152901	-4.55693
Slc27a4	-1.00027	0.216044	-2.08228	0.0544293	0.132943	-4.34662
Urm1	-0.179431	4.50453	-0.671317	0.511989	0.615041	-6.07666
2600006K01Rik	-0.735577	3.97256	-1.99976	0.0635336	0.144822	-4.48191
Cercam	0.198194	4.07649	0.733945	0.474038	0.579775	-6.03279
Odf2	-0.477959	6.04312	-2.30936	0.0352101	0.102283	-3.95979
Gle1	-0.0996561	4.88547	-0.508493	0.618333	0.707779	-6.17332
Sptan1	-1.19545	0.729027	-2.40535	0.0291764	0.0914277	-3.79061
Wdr34	-1.77768	2.27036	-2.5876	0.0203126	0.0751129	-3.46159
Set	0.384135	9.8192	2.14393	0.0484261	0.12333	-4.24362
Pkn3	-0.885029	-0.801033	-2.26666	0.0382544	0.107157	-4.03403
Zdhhc12	0.16822	2.96618	0.538978	0.597628	0.690101	-6.15717
Zer1	-1.35886	2.07921	-1.96502	0.0677655	0.150713	-4.53795
Tbc1d13	-1.05971	2.53864	-1.31716	0.207097	0.314357	-5.46014
Endog	0.210913	4.32854	0.65082	0.52478	0.62628	-6.09022
Spout1	-0.00389958	4.24747	-0.0141163	0.988919	0.992726	-6.30527
Kyat1	0.834678	1.80923	2.1038	0.0522605	0.129589	-4.31085
1700084E18Rik	-1.22622	-0.32372	-2.53345	0.0226348	0.0793684	-3.56034
Lrrc8a	-2.09039	2.58452	-3.14752	0.0064841	0.0412273	-2.40469
Phyhd1	-0.719592	-0.928292	-2.38847	0.0301613	0.0931771	-3.82058
Dolk	-0.834658	1.84374	-1.06792	0.302057	0.41356	-5.73935
Nup188	0.0321941	5.46497	0.214723	0.832808	0.879887	-6.28166
Gm14471	-0.52528	0.213511	-1.06477	0.303432	0.414676	-5.74255
Sh3glb2	0.0903965	3.90452	0.291802	0.774343	0.833384	-6.26163
Miga2	-0.161261	4.09781	-0.647861	0.526641	0.627894	-6.09215
Dolpp1	-1.89243	3.84839	-2.10006	0.0526313	0.130182	-4.31708
Crat	-1.19888	4.7501	-3.76564	0.00180187	0.0231898	-1.19913
Ptpa	-0.437279	7.29279	-2.90415	0.0106949	0.0531373	-2.8708
Ntmt1	0.563174	4.71432	2.62432	0.0188698	0.0720982	-3.39421
Asb6	-2.66572	3.88793	-3.30419	0.00468949	0.0352726	-2.10106
Prrx2	-0.714865	-1.33034	-2.47823	0.0252626	0.0846521	-3.6602
Ptges	-0.95882	-1.14269	-2.52934	0.0228209	0.0796768	-3.56779
Tor1b	-2.46937	4.62583	-2.57011	0.0210365	0.0763424	-3.49357
Tor1a	0.125179	5.85173	0.656394	0.521284	0.623614	-6.08658
BC005624	0.108086	6.08574	0.771185	0.452299	0.559513	-6.00497
Usp20	0.536224	2.41367	1.40577	0.179697	0.284357	-5.34968
Fnbp1	0.764192	4.56769	2.41415	0.028675	0.0905972	-3.77495
D330023K18Rik	-0.544372	0.707607	-0.855998	0.405156	0.514727	-5.93692
Gpr107	0.135536	4.24452	0.590424	0.563494	0.66041	-6.12787
Ass1	0.753368	3.78811	1.33517	0.201275	0.307948	-5.43816
Fubp3	0.288915	4.26833	1.51364	0.15042	0.25227	-5.20788
Exosc2	-0.435451	4.85859	-1.62146	0.125263	0.222738	-5.05857
Gm13427	-1.67904	0.285586	-3.2767	0.0049642	0.0363511	-2.15449
Abl1	-0.460115	4.58924	-1.90992	0.0750002	0.160543	-4.62564
Nup214	0.12396	6.45594	1.0379	0.315381	0.427671	-5.76964
Fam78a	-0.498996	3.86577	-1.38369	0.186235	0.291682	-5.37774
Plpp7	-0.415266	-1.5608	-1.64319	0.120653	0.217251	-5.0276
Prrc2b	-0.0254152	5.55794	-0.0955699	0.925098	0.949638	-6.30067
Gm13610	-1.018	-0.335901	-2.20092	0.0434255	0.115095	-4.14702
Pomt1	0.373947	3.1585	1.3441	0.198435	0.305083	-5.42716
Uck1	0.43756	4.55393	1.95224	0.0693851	0.153032	-4.55842
Swi5	0.0877653	8.32075	0.608491	0.551755	0.650212	-6.11697
Golga2	0.189425	4.60526	0.837316	0.415254	0.52441	-5.95247
Ciz1	-0.185297	4.61771	-0.980238	0.342158	0.453791	-5.82574
1110008P14Rik	-0.555463	5.80622	-1.94214	0.0706894	0.154526	-4.57454
Lcn2	-0.257685	7.46856	-0.92434	0.369604	0.480645	-5.87742
Ptges2	0.545077	4.04275	2.11473	0.0511891	0.127766	-4.2926
Slc25a25	-2.31974	3.08232	-3.23604	0.00540002	0.0375035	-2.23341
Naif1	-1.92341	0.473569	-3.90949	0.00133842	0.0204725	-0.917612
Fam102a	-1.47956	-0.742116	-3.54595	0.0028408	0.0278647	-1.62927
Dpm2	-0.225017	5.42151	-1.01085	0.327749	0.439241	-5.79631
Pip5kl1	-0.496841	-1.49805	-1.98016	0.0658907	0.148113	-4.5136
St6galnac4	-1.25537	3.10165	-1.3882	0.184884	0.290272	-5.37203
St6galnac6	-1.34391	2.60049	-1.68439	0.112314	0.207453	-4.96812
Ak1	-1.19776	-0.0846292	-2.33441	0.033531	0.0992932	-3.91593
Eng	-0.0650362	4.6308	-0.210165	0.836301	0.882441	-6.28265
Fpgs	0.917069	4.80752	2.56882	0.0210909	0.0764491	-3.49593
Cdk9	0.0961542	6.39174	0.834097	0.417011	0.526165	-5.95511
Sh2d3c	-0.805798	0.0664501	-1.56639	0.137626	0.237013	-5.13576
Ttc16	-0.834283	-1.23848	-2.34313	0.0329649	0.0982605	-3.90063
Tor2a	0.435076	4.28063	1.94986	0.06969	0.153314	-4.56222
Ptrh1	0.898377	2.18353	2.25213	0.0393455	0.108856	-4.05914
Stxbp1	1.39578	3.0179	3.66075	0.00223905	0.0247663	-1.40453
Fam129b	-0.755423	0.242561	-1.24098	0.233233	0.341981	-5.55055
Lrsam1	-0.824672	1.20445	-1.21682	0.242041	0.351419	-5.57831
Rpl12	-0.216599	10.9608	-1.18154	0.25536	0.365954	-5.61805
Slc2a8	0.344749	3.56301	1.29608	0.214085	0.321833	-5.48559
Garnl3	-1.11293	-1.02414	-2.78471	0.0136446	0.0610894	-3.09616
Ralgps1	-0.714527	0.690512	-1.16241	0.262814	0.373888	-5.63919
Angptl2	-0.0264405	-1.46149	-0.0846126	0.933662	0.955122	-6.30168
Zbtb34	-1.87138	1.70649	-3.28919	0.00483738	0.0358833	-2.13021
Zbtb43	0.246551	3.55441	0.912732	0.375488	0.486128	-5.88782
Mvb12b	-1.18654	5.33561	-4.20848	0.000723981	0.0161598	-0.33493
Pbx3	-1.35542	7.46659	-4.60955	0.000320941	0.0124253	0.43701
C79798	-1.24102	1.34244	-2.06544	0.0561852	0.135103	-4.37449
Mapkap1	0.461255	5.89373	3.25838	0.00515603	0.0367971	-2.19006
Gapvd1	-0.0722932	7.10996	-0.528813	0.604494	0.695536	-6.16265
Hspa5	-0.136709	8.82133	-0.964657	0.34966	0.461553	-5.84042
Rabepk	0.0923985	4.90503	0.559038	0.584196	0.678826	-6.14605
Fbxw2	-0.392282	6.31108	-2.12201	0.050487	0.126718	-4.28043
Psmd5	0.160738	6.72138	0.881265	0.391757	0.501633	-5.9154
Phf19	-1.19404	1.64754	-1.86523	0.0813691	0.168998	-4.69565
Traf1	-0.611969	-0.481064	-1.14924	0.26804	0.378886	-5.65358
AI182371	-1.12453	-0.616804	-2.61546	0.0192087	0.0728485	-3.4105
Cntrl	-0.0663457	5.94364	-0.4033	0.692286	0.770945	-6.22204
Rab14	-0.271415	6.71486	-1.54504	0.14269	0.242969	-5.16517
Gsn	-1.82309	2.59776	-2.46459	0.0259547	0.0859447	-3.68472
Stom	-0.57543	6.45585	-2.40411	0.0292477	0.0915867	-3.79281
Ggta1	-2.60105	3.06106	-3.94848	0.00123499	0.0201175	-0.841397
Dab2ip	-0.472752	-0.189739	-1.04628	0.311619	0.423444	-5.76126
Ttll11	-0.972974	-0.370539	-1.63114	0.123192	0.220414	-5.04482
9030204H09Rik	-0.678389	-0.959987	-1.88679	0.0782382	0.164944	-4.66199
Ndufa8	0.187729	7.83192	1.2905	0.215967	0.324038	-5.49228
Rbm18	-0.0718872	4.14969	-0.274469	0.787382	0.843011	-6.26666
Mrrf	-0.19715	4.64202	-0.757128	0.460431	0.567017	-6.01562
Gm13431	-1.0176	-1.09747	-3.23933	0.00536329	0.037354	-2.22701
Ptgs1	-0.959337	0.547401	-1.72215	0.105114	0.198635	-4.91273
Pdcl	0.314136	3.63411	1.13806	0.272538	0.383744	-5.66568
Rc3h2	-2.57684	4.4469	-2.81967	0.0127078	0.0586372	-3.03047
Zbtb6	-0.192336	3.97705	-0.7658	0.455404	0.562227	-6.00907
Zbtb26	-1.50226	1.54339	-2.5403	0.0223276	0.0788707	-3.54789
Rabgap1	-0.459565	4.9142	-1.7809	0.0947122	0.185909	-4.82494
Strbp	-0.208039	6.43838	-1.02148	0.322847	0.434203	-5.7859
Gpr21	-0.509099	-1.09021	-1.82731	0.0871463	0.176039	-4.75424
Dennd1a	-0.728756	7.12765	-3.16332	0.00627593	0.0405067	-2.37417
Nek6	0.76473	0.0904523	0.935348	0.364083	0.475299	-5.86746
Psmb7	0.0394531	7.40182	0.300078	0.768141	0.829178	-6.25912
Nr6a1	0.326907	2.2406	0.574972	0.573637	0.669545	-6.13693
Nr6a1os	1.469	-1.21255	1.84555	0.0843237	0.172738	-4.72615
Gm13496	0.600773	-1.11682	1.07344	0.299651	0.410949	-5.73369
Wdr38	-0.907794	-0.216242	-1.81238	0.0895193	0.179467	-4.77711
Rpl35	-0.422586	9.7909	-1.34448	0.198313	0.30496	-5.42669
Arpc5l	-0.292062	6.6069	-1.81483	0.0891261	0.178991	-4.77336
Golga1	0.112293	5.28451	0.604739	0.554182	0.652127	-6.11926
Scai	-0.765941	4.85075	-2.84746	0.012008	0.0568233	-2.97809
Ppp6c	-0.367699	6.24196	-2.25123	0.0394142	0.108952	-4.0607
Lrp1b	-1.23056	-0.933658	-2.92719	0.0102023	0.0518367	-2.82705
Kynu	-1.46855	-0.13731	-3.67875	0.00215711	0.0243122	-1.36929
Arhgap15	0.133091	5.67271	0.505095	0.620662	0.709732	-6.17506
Gtdc1	-1.19029	5.3747	-4.39341	0.000496657	0.0141348	0.0227006
Zeb2	-0.290492	7.4778	-1.95274	0.0693208	0.152979	-4.55762
Zeb2os	-1.74664	2.13781	-2.70684	0.015978	0.0661982	-3.24158
Acvr2a	-1.91861	0.469875	-3.56013	0.00275845	0.0274789	-1.60152
Orc4	0.136018	5.63259	0.834735	0.416662	0.52583	-5.95459
Mbd5	-0.723334	6.10556	-3.75501	0.00184193	0.0231898	-1.21993
Epc2	-0.401341	5.70726	-2.76346	0.0142464	0.0625243	-3.13597
Kif5c	-0.976329	-0.367959	-1.77872	0.0950805	0.186256	-4.82822
Lypd6b	-0.654773	-1.37657	-1.92528	0.0729167	0.157536	-4.60134
Mmadhc	-0.122011	6.18202	-0.84293	0.412202	0.521223	-5.94783
Gm13483	-2.37507	0.560011	-5.1856	0.000102703	0.00886379	1.51612
Rnd3	-0.593875	-0.096568	-1.20765	0.245451	0.355257	-5.58874
Rbm43	-0.311752	5.97137	-1.86047	0.0820749	0.169845	-4.70304
Nmi	0.416763	4.70409	1.73797	0.102219	0.19493	-4.88928
Tnfaip6	-0.653427	-1.3776	-2.12711	0.0500001	0.125943	-4.27187
Rif1	-0.232475	7.83314	-1.9985	0.0636829	0.145085	-4.48396
Neb	-0.998244	-0.713944	-2.96243	0.00949115	0.0501491	-2.75994
Gm13522	0.173991	-0.472373	0.322793	0.751205	0.815828	-6.25188
Arl5a	-0.158591	5.21548	-0.800618	0.435563	0.543573	-5.98209
A430018G15Rik	-1.94275	0.0125979	-3.96735	0.00118787	0.0198483	-0.804533
Stam2	-0.0140761	4.0808	-0.0649602	0.949044	0.966056	-6.3032
Fmnl2	-1.6712	1.5744	-2.58806	0.0202941	0.0750822	-3.46076
Prpf40a	-0.176265	8.2303	-1.64637	0.119991	0.216771	-5.02305
Arl6ip6	-0.617978	6.66299	-3.24191	0.00533482	0.0372432	-2.22202
Nr4a2	-1.43905	2.45146	-1.98017	0.0658892	0.148113	-4.51358
BB557941	-0.0637054	-1.43282	-0.198624	0.845162	0.889419	-6.28507
A930012O16Rik	-0.673047	-0.964096	-1.91886	0.0737802	0.158892	-4.6115
Gpd2	0.496458	4.98709	2.19574	0.0438595	0.115769	-4.15585
Cytip	-0.441631	2.6496	-1.15583	0.265414	0.376437	-5.64639
Acvr1	0.355002	-0.826473	0.622525	0.542729	0.642527	-6.10829
Upp2	-0.31301	-1.63946	-1.18814	0.252827	0.363272	-5.61069
Ccdc148	-0.18178	-1.34199	-0.471925	0.643615	0.729299	-6.19149
Pkp4	-0.525632	4.51476	-2.17132	0.0459601	0.119191	-4.19736
Tanc1	-0.675147	0.610024	-1.15931	0.264034	0.375264	-5.64258
Wdsub1	0.483954	4.17904	1.91454	0.074368	0.159722	-4.61834
Baz2b	-0.735605	6.87415	-4.15792	0.000802934	0.0168321	-0.433134
Gm13572	-0.260426	-1.67991	-1.00839	0.328888	0.440489	-5.7987
Gm13620	-0.748728	-0.691019	-1.71967	0.105574	0.1992	-4.9164
March7	-0.400348	5.4595	-2.79977	0.0132331	0.0599013	-3.06789
Cd302	-0.727012	0.649921	-1.28397	0.218184	0.326439	-5.50007
Ly75	-1.5023	1.37519	-2.4601	0.0261867	0.086145	-3.69279
Rbms1	-0.300206	4.80551	-1.79191	0.0928659	0.183638	-4.80827
Tank	-0.20601	6.24078	-1.10458	0.286344	0.39735	-5.70133
Psmd14	-0.107941	7.90252	-0.946669	0.358464	0.46991	-5.8571
Tbr1	-0.214006	-1.3172	-0.588885	0.564499	0.661379	-6.12878
Slc4a10	0.00687587	-1.48711	0.0228001	0.982103	0.987835	-6.3051
Dpp4	0.560144	2.2419	1.23442	0.2356	0.344514	-5.55813
Gm13561	-0.46541	-1.52223	-1.69941	0.1094	0.203974	-4.94619
Gm13565	0.514173	-0.651788	0.924819	0.369363	0.480415	-5.87699
Fap	-2.25706	0.469233	-4.27492	0.000632102	0.0153323	-0.206151
Ifih1	-0.540124	5.4134	-3.22799	0.00549066	0.0377502	-2.24901
Gca	-1.61638	1.8543	-2.56544	0.0212341	0.0766839	-3.5021
Grb14	-0.521876	-1.4788	-2.04635	0.0582361	0.138099	-4.4059
Cobll1	-1.02329	-0.694676	-2.99453	0.00888604	0.0485731	-2.69867
Galnt3	-1.6488	-0.611932	-3.89037	0.0013923	0.0208437	-0.954997
Ttc21b	0.110213	0.31708	0.157407	0.876975	0.91282	-6.29262
Stk39	0.0842308	-0.405325	0.105159	0.917611	0.944307	-6.29968
Cers6	-0.0703004	3.06354	-0.18283	0.857323	0.898105	-6.28817
Nostrin	-1.42793	-0.781831	-4.15075	0.000814809	0.0169101	-0.447062
Spc25	-3.33921	5.95033	-3.02353	0.00837185	0.0471116	-2.64318
Dhrs9	-1.67792	0.0237461	-3.232	0.00544525	0.0376946	-2.24123
Bbs5	1.4068	0.982499	2.74421	0.0148137	0.0636967	-3.17195
Fastkd1	0.697456	3.82952	1.97854	0.0660885	0.148379	-4.5162
Ppig	-0.0124148	7.32491	-0.117253	0.908179	0.936812	-6.29829
Ccdc173	0.600328	0.329916	0.779881	0.447313	0.554966	-5.9983
Phospho2	-0.336342	4.33255	-1.63797	0.121747	0.218346	-5.03507
Klhl23	-0.630488	5.47124	-2.83214	0.0123891	0.0577925	-3.00699
Ssb	-0.110034	8.83225	-0.881555	0.391605	0.50151	-5.91515
Mettl5	0.458846	5.58671	3.13414	0.00666566	0.041834	-2.43051
Gm13625	-0.676572	-0.961384	-1.7056	0.108219	0.20236	-4.93711
Mettl5os	-1.84703	0.649249	-3.12765	0.0067555	0.0421114	-2.44302
Ubr3	-0.672327	5.63025	-3.3766	0.00403611	0.0328136	-1.96008
Gorasp2	0.253198	5.09909	0.92816	0.367682	0.478649	-5.87398
Tlk1	-0.143716	7.94706	-1.03404	0.317124	0.429233	-5.77348
Mettl8	0.104997	4.64243	0.554679	0.587102	0.681132	-6.1485
Dcaf17	-0.181128	4.76715	-0.647057	0.527148	0.628412	-6.09267
Dync1i2	-0.540771	6.02611	-2.95739	0.00958988	0.0502765	-2.76956
Slc25a12	-0.869693	5.45769	-4.99779	0.000148283	0.00966062	1.16877
Hat1	-0.534164	7.81029	-2.78453	0.0136496	0.0610894	-3.09649
Metap1d	-0.821637	5.75868	-2.28725	0.0367569	0.104986	-3.99831
Dlx1as	-1.43491	-0.776465	-4.72014	0.000257145	0.011512	0.647194
Dlx1	0.133764	-1.58472	0.415772	0.683328	0.762965	-6.21683
Itga6	-0.79545	1.72539	-1.00404	0.330915	0.442763	-5.80292
Pdk1	-0.458867	4.75763	-1.83648	0.0857178	0.174447	-4.74015
Rapgef4	0.448903	1.26183	0.700257	0.494238	0.598065	-6.05684
Map3k20	-0.685229	6.68904	-4.29813	0.000602881	0.0150227	-0.161235
Cdca7	0.455163	6.44904	2.29131	0.0364678	0.104503	-3.99124
Sp3	-0.898718	6.65899	-4.72402	0.000255159	0.011512	0.654547
Gm11084	-0.848821	2.15172	-1.07632	0.298402	0.409691	-5.73074
Sp3os	-0.633595	4.1211	-1.95078	0.0695712	0.153148	-4.56074
Ola1	0.0843569	7.89479	0.65018	0.525182	0.626507	-6.09064
Sp9	0.793857	-0.693211	0.975254	0.344545	0.456142	-5.83046
Cir1	-0.894564	6.64658	-3.71393	0.00200545	0.0237739	-1.30038
Scrn3	-1.29882	5.48627	-3.91589	0.00132086	0.020371	-0.905099
Gpr155	-0.646938	4.28916	-3.0452	0.00800677	0.0462409	-2.60163
Gm13703	-0.397926	-1.17573	-1.32462	0.20467	0.311566	-5.45107
D230022J07Rik	0.178963	-0.0797815	0.265897	0.793855	0.848225	-6.26904
Wipf1	-0.554848	4.55174	-2.36625	0.0315056	0.0955286	-3.85988
Gm13708	-1.03762	-1.08207	-2.97112	0.00932343	0.049706	-2.74337
Chn1	-0.871649	-0.811325	-1.80524	0.0906754	0.180819	-4.78801
Atf2	-0.509341	5.88267	-2.91022	0.0105629	0.0527649	-2.85929
Atp5g3	-0.0970176	8.99411	-0.558502	0.584553	0.679076	-6.14635
Lnpk	-1.11411	6.01903	-2.98972	0.00897418	0.0487918	-2.70786
4930445N08Rik	-0.143967	-1.37108	-0.502459	0.622472	0.711417	-6.17641
Mtx2	0.121019	6.86505	0.984305	0.340218	0.451866	-5.82187
Hnrnpa3	-0.25328	9.60701	-1.87611	0.0797749	0.166762	-4.67869
Nfe2l2	0.377117	7.08962	2.59578	0.0199825	0.0742846	-3.44662
E030042O20Rik	-0.39174	0.590198	-0.604139	0.554571	0.652325	-6.11962
Gm13657	0.0731294	-1.53808	0.212535	0.834484	0.881155	-6.28214
Agps	-0.657238	5.31894	-2.03427	0.05957	0.139786	-4.42571
Ttc30b	-0.378807	-1.19043	-1.10812	0.284863	0.395907	-5.69761
Ttc30a1	-0.437791	-0.615047	-0.926389	0.368572	0.479639	-5.87558
Rbm45	0.294925	4.28647	1.43598	0.171062	0.274771	-5.31077
Prkra	1.26262	3.01835	3.78937	0.00171551	0.0228231	-1.15265
Fkbp7	-0.716346	0.473485	-1.40641	0.179513	0.284279	-5.34888
Plekha3	0.470965	4.15075	2.00274	0.0631821	0.144487	-4.47708
Ccdc141	-4.02141	2.77076	-5.59273	4.70352e-05	0.00799838	2.25244
Sestd1	-0.0423184	-0.520842	-0.0780126	0.938825	0.958948	-6.30224
Cwc22	0.336597	5.61029	2.09488	0.0531496	0.13107	-4.3257
Ube2e3	-0.295061	7.29782	-1.68856	0.111498	0.206487	-4.96205
Itga4	-0.712559	8.30471	-3.41288	0.00374361	0.0316689	-1.8893
Cerkl	-2.46137	2.29522	-3.77878	0.00175351	0.0230089	-1.17339
Itprid2	-1.53013	2.06016	-2.11331	0.0513273	0.128025	-4.29498
Dnajc10	-0.630463	6.66157	-4.17757	0.000771246	0.0165793	-0.394934
Nckap1	-0.266416	5.50381	-1.58864	0.13251	0.231385	-5.10479
Dusp19	0.174401	3.88617	0.650685	0.524865	0.62633	-6.09031
Nup35	-0.202169	6.07504	-1.165	0.261794	0.372844	-5.63634
Zc3h15	-0.218152	7.1502	-1.41361	0.177423	0.281872	-5.33964
Itgav	-1.87478	0.60439	-3.12526	0.00678891	0.0422078	-2.44763
Calcrl	-1.19609	1.98032	-1.63993	0.121337	0.217964	-5.03228
Tfpi	-0.555704	3.27486	-0.976778	0.343814	0.455336	-5.82902
Gm13710	-0.92522	-1.16853	-2.27365	0.0377399	0.10646	-4.02192
Ctnnd1	0.112623	4.13045	0.45286	0.656981	0.740916	-6.20045
Selenoh	0.186865	7.42214	0.829882	0.419318	0.528282	-5.95857
Tmx2	0.0260997	4.76824	0.143509	0.887754	0.92154	-6.29477
Med19	-0.466425	6.45315	-2.03438	0.0595578	0.139779	-4.42553
Zdhhc5	-1.17729	5.30633	-4.12005	0.000867758	0.0173401	-0.506787
Clp1	-0.567776	5.12769	-3.71706	0.00199253	0.0237199	-1.29426
Ypel4	-3.61282	4.08563	-4.54488	0.00036556	0.0129927	0.313516
Serping1	-0.490669	-1.5028	-1.67668	0.113836	0.209377	-4.97933
Ube2l6	-1.26499	7.48858	-3.97478	0.00116982	0.0197697	-0.79002
Smtnl1	-0.345287	-1.61463	-1.57416	0.135821	0.235247	-5.12498
Timm10	0.520715	5.99163	2.23871	0.0403783	0.110477	-4.08226
Slc43a1	-0.936047	6.84183	-3.94254	0.0012502	0.0201175	-0.852997
Slc43a3	-0.764987	7.57941	-3.77772	0.00175738	0.0230089	-1.17547
Prg2	-1.9945	0.619689	-2.79087	0.0134747	0.0605178	-3.0846
Prg3	-0.458318	-1.12927	-1.11973	0.280034	0.390956	-5.68532
P2rx3	-1.33955	-0.849819	-4.69976	0.00026784	0.0117109	0.608554
Ssrp1	-0.0588774	8.03134	-0.460279	0.651765	0.736378	-6.197
Tnks1bp1	1.76316	-0.510403	2.37312	0.0310844	0.0948922	-3.84776
Olfr1160	-0.554186	-1.45394	-1.7381	0.102195	0.19493	-4.88909
Ptprj	-0.157164	5.65038	-0.90193	0.38102	0.49138	-5.89738
4933423P22Rik	-0.633237	-1.39313	-2.10667	0.051977	0.129189	-4.30606
Nup160	-0.300665	6.29468	-1.96502	0.0677653	0.150713	-4.53795
Fnbp4	-0.225795	6.69483	-1.85068	0.0835446	0.171807	-4.71822
Agbl2	-0.45148	-1.53295	-1.44815	0.16768	0.271249	-5.29491
Mtch2	0.0875255	7.49484	0.739693	0.470642	0.576669	-6.02858
C1qtnf4	-0.816021	3.34244	-1.67315	0.114538	0.2102	-4.98445
Ndufs3	-0.191747	7.1881	-1.31027	0.209361	0.316838	-5.4685
Kbtbd4	0.292126	3.50571	1.08317	0.295446	0.40673	-5.72367
Ptpmt1	0.745355	5.42978	3.68758	0.002118	0.0240727	-1.352
Celf1	-0.376853	7.45941	-2.66661	0.0173302	0.0690275	-3.3162
Rapsn	-0.837296	-1.23616	-2.33258	0.0336514	0.0994742	-3.91915
Gm13778	-1.95052	0.885778	-3.0794	0.00746232	0.0446865	-2.53595
Psmc3	-0.508782	8.23819	-2.85336	0.0118644	0.0563417	-2.96696
Slc39a13	0.0780973	2.82282	0.24822	0.807252	0.858543	-6.2737
Spi1	-1.91981	3.77272	-2.10502	0.0521401	0.12941	-4.30882
Madd	-1.34167	2.03901	-1.93609	0.0714809	0.15582	-4.58417
Nr1h3	0.244008	-0.526232	0.444319	0.663009	0.746092	-6.20434
Acp2	-1.42998	2.57771	-1.90523	0.0756461	0.161293	-4.63302
Ddb2	-0.150964	3.51611	-0.700699	0.49397	0.597789	-6.05653
Arfgap2	-0.650216	4.96868	-4.12239	0.000863598	0.0173401	-0.502228
1110051M20Rik	-1.2111	2.19502	-1.64379	0.120528	0.217178	-5.02675
Lrp4	-0.108059	-1.3987	-0.299288	0.768732	0.829514	-6.25937
Ckap5	-0.505704	7.49147	-3.06871	0.00762838	0.0451158	-2.55649
F2	-0.532499	-1.07221	-1.58499	0.133339	0.232274	-5.1099
Zfp408	-0.527737	1.70713	-0.693714	0.49822	0.602244	-6.06139
Arhgap1	0.463065	3.68892	1.83644	0.0857229	0.174447	-4.7402
Atg13	-0.68795	3.72433	-2.73288	0.0151578	0.0647023	-3.1931
Harbi1	0.639793	2.62599	1.97012	0.0671286	0.149919	-4.52976
Ambra1	-0.176432	5.81464	-1.24007	0.233561	0.342259	-5.55161
Mdk	-0.731405	-0.38919	-1.43938	0.170111	0.273778	-5.30635
Dgkz	0.334925	4.97382	1.22785	0.237988	0.347098	-5.56569
Gm9821	0.405735	-0.650638	0.964019	0.34997	0.461838	-5.84101
Creb3l1	-0.962176	-1.1401	-2.74725	0.0147227	0.063524	-3.16628
Phf21a	-0.226167	4.06562	-0.958743	0.352538	0.464401	-5.84593
Pex16	0.00485973	3.81555	0.0214187	0.983187	0.988523	-6.30513
1700029I15Rik	-0.588814	-1.42731	-1.90784	0.0752854	0.160852	-4.6289
Cry2	-0.0208819	3.26163	-0.0810848	0.936422	0.957086	-6.30198
Slc35c1	0.636634	2.56527	1.39524	0.182793	0.288056	-5.36311
Gm13814	-0.424112	-1.554	-1.43281	0.171952	0.275501	-5.31488
Prdm11	-1.07465	0.636106	-1.97537	0.0664784	0.149036	-4.52131
Trp53i11	-0.641699	-1.38662	-2.50232	0.0240821	0.0821828	-3.61673
Tspan18	-0.91482	-0.778116	-2.4517	0.0266258	0.0868401	-3.70786
Gm13807	-0.427748	-1.5512	-1.6272	0.124032	0.221293	-5.05043
Cd82	-1.08226	6.73593	-3.64479	0.00231437	0.0251292	-1.43579
Gm10804	0.0522877	-0.99203	0.0938317	0.926456	0.950345	-6.30084
Ext2	-0.0584527	4.67868	-0.356529	0.726295	0.796597	-6.24017
Accs	-0.791288	-0.65828	-1.95135	0.0694986	0.153143	-4.55984
Gm13889	-0.532684	-1.47048	-2.0196	0.0612266	0.141926	-4.44967
Alkbh3	-1.77862	3.90405	-1.91307	0.0745682	0.160054	-4.62066
Hsd17b12	0.725833	4.96396	2.36197	0.0317709	0.0961366	-3.86743
Mir670hg	-0.205079	-1.10921	-0.438873	0.666864	0.749157	-6.20679
Ttc17	0.260372	4.98328	1.32871	0.203346	0.310189	-5.44606
2810002D19Rik	-0.759479	1.74039	-1.04259	0.313272	0.42534	-5.76496
Api5	0.181508	6.87386	1.48671	0.15733	0.259838	-5.24402
Lrrc4c	-0.508257	-1.48927	-1.44887	0.167483	0.271078	-5.29397
B230118H07Rik	0.837969	3.62514	2.76786	0.0141196	0.0621339	-3.12773
Rag2	-0.305021	-1.64561	-1.11038	0.283919	0.394854	-5.69523
Traf6	-2.11931	3.33413	-2.74632	0.0147503	0.0635878	-3.168
Prr5l	-1.12909	-0.398431	-2.68832	0.0165873	0.0673902	-3.27597
Commd9	0.835412	3.65872	3.68084	0.00214774	0.0242251	-1.36518
Ldlrad3	-0.927895	0.457495	-1.52682	0.147135	0.248256	-5.19004
Gm13919	0.0888921	-1.5502	0.311291	0.759765	0.822473	-6.25561
Trim44	-0.230887	5.56964	-1.51472	0.150149	0.251909	-5.20643
Cd44	0.461996	6.26633	1.97615	0.0663825	0.148956	-4.52006
Pdhx	0.216777	5.1885	1.24801	0.230718	0.339435	-5.54239
Apip	-1.3236	6.25227	-3.3276	0.00446749	0.0343441	-2.05552
Ehf	0.506262	-1.04412	0.850259	0.408241	0.517715	-5.94173
Cat	0.410753	5.38011	1.83968	0.0852231	0.173836	-4.73521
Abtb2	-2.10778	1.77825	-3.61604	0.00245649	0.025862	-1.49208
Nat10	0.644831	4.65902	1.97392	0.0666577	0.149321	-4.52365
Caprin1	-0.121218	7.73658	-0.883002	0.390846	0.500842	-5.9139
Gm13881	0.0702709	-0.607449	0.15836	0.876237	0.912244	-6.29246
Lmo2	-0.162638	9.1139	-0.778888	0.447881	0.555345	-5.99906
4931422A03Rik	-1.66562	1.37193	-3.03816	0.00812359	0.0464864	-2.61513
Fbxo3	-0.398783	6.76998	-2.04662	0.0582071	0.138062	-4.40547
Cd59b	-0.616743	4.12387	-1.88715	0.0781864	0.164883	-4.66142
Cd59a	-2.99631	4.86197	-3.0655	0.00767896	0.0452881	-2.56265
A930018P22Rik	-0.517567	0.0595944	-0.95302	0.355339	0.467093	-5.85124
Hipk3	-0.495852	4.06791	-2.21097	0.0425951	0.113728	-4.12985
Cstf3	-0.0806859	6.28553	-0.496633	0.62648	0.714816	-6.17936
Tcp11l1	-1.4958	0.48915	-2.02557	0.0605472	0.141105	-4.43993
Depdc7	-0.513561	-1.08678	-1.49711	0.154632	0.2569	-5.23013
Qser1	0.329535	4.1208	1.16346	0.262401	0.373444	-5.63804
Prrg4	0.158224	0.0978628	0.215486	0.832224	0.879332	-6.28149
Ccdc73	-2.50434	0.920439	-4.52483	0.000380645	0.0130258	0.275149
Eif3m	0.0764353	8.66516	0.550832	0.589672	0.683149	-6.15064
Them7	-0.0146739	-1.25568	-0.0364755	0.971373	0.980469	-6.30468
Rcn1	0.610042	2.97081	1.94252	0.0706399	0.154509	-4.57393
Elp4	-2.96895	5.76015	-2.66922	0.0172391	0.0687755	-3.31136
Immp1l	0.0434309	6.24863	0.282978	0.780972	0.838343	-6.26423
Dnajc24	-0.556043	5.38059	-1.68425	0.112341	0.207477	-4.96832
Mpped2	-2.20241	-0.186074	-4.02935	0.00104551	0.0187373	-0.683513
Arl14ep	-1.29504	2.64511	-1.66236	0.11671	0.212866	-5.00006
Mettl15	-0.00745631	4.56948	-0.0484698	0.961967	0.974725	-6.30416
Kif18a	-0.695775	6.81894	-3.32733	0.00446999	0.0343441	-2.05604
Lin7c	0.0630791	4.42201	0.391217	0.70101	0.777781	-6.22693
Lgr4	-1.27162	1.13506	-2.19446	0.0439672	0.11595	-4.15803
Ccdc34	-0.863456	7.55586	-2.72884	0.0152824	0.0648998	-3.20063
Ccdc34os	-0.578046	-1.43559	-1.84606	0.0842457	0.172629	-4.72536
Lpcat4	-0.327633	0.309908	-0.434323	0.670094	0.751814	-6.20881
Nop10	0.454764	8.92604	1.60598	0.128639	0.227107	-5.08046
Slc12a6	-0.225446	5.44294	-1.1931	0.250934	0.361182	-5.60513
Emc4	0.378874	4.94704	1.37244	0.189638	0.295545	-5.3919
Katnbl1	-0.253729	5.2631	-1.42141	0.175184	0.279153	-5.32962
Emc7	-0.505121	6.50277	-2.68424	0.0167247	0.0677442	-3.28355
Aven	0.708359	5.86168	4.4356	0.000455919	0.0138184	0.103919
Ryr3	-0.769048	-0.890249	-2.03654	0.0593174	0.13961	-4.42199
Fmn1	-1.02263	-1.0936	-3.4781	0.00327	0.0299093	-1.76193
Scg5	-1.53144	-0.303794	-4.01904	0.00106793	0.0190009	-0.703627
Arhgap11a	-0.537752	5.57259	-3.14363	0.00653634	0.041374	-2.4122
Aqr	-0.210575	6.13037	-1.36852	0.190836	0.296817	-5.3968
Zfp770	0.911245	3.65491	2.89589	0.0108772	0.0535915	-2.88648
Dph6	0.109997	4.93976	0.554751	0.587053	0.681132	-6.14845
Gm13972	0.361233	-1.22968	0.770902	0.452461	0.55962	-6.00519
Gm13977	-0.812925	-0.326482	-1.66431	0.116314	0.212512	-4.99724
BC052040	-0.361776	5.54266	-2.22013	0.0418506	0.11251	-4.11416
Spred1	0.36816	4.42381	1.5531	0.14076	0.240624	-5.1541
Fam98b	-0.751029	5.70793	-2.00095	0.0633939	0.144659	-4.48
Rasgrp1	-0.591768	-1.02662	-2.32547	0.0341217	0.100254	-3.93162
Gm13986	-0.822801	-1.24731	-2.67976	0.0168765	0.0680717	-3.29185
Thbs1	-1.32872	-0.459732	-3.30414	0.00468993	0.0352726	-2.10115
Eif2ak4	0.549786	4.08288	2.46201	0.0260879	0.0860807	-3.68936
Srp14	0.381808	7.33216	2.84091	0.0121695	0.0573146	-2.99045
Bmf	-0.0588838	-1.22167	-0.159904	0.875041	0.911319	-6.29221
Bub1b	-0.608927	6.27075	-3.50615	0.0030852	0.0289954	-1.7071
Pak6	-0.786937	1.94022	-0.982006	0.341313	0.452996	-5.82406
Plcb2	-2.10758	0.615236	-3.93556	0.00126833	0.0201478	-0.866644
Inafm2	-2.54332	3.22198	-3.64326	0.00232174	0.0251544	-1.43879
Ccdc9b	0.315582	0.435951	0.436459	0.668577	0.750567	-6.20786
Disp2	-0.705744	-1.33736	-2.69754	0.0162812	0.066767	-3.25886
Knstrn	-0.06093	6.4967	-0.370198	0.71629	0.789247	-6.2351
Gm14091	-0.862094	-1.21709	-3.09896	0.00716739	0.0436433	-2.49831
Ivd	-1.49029	3.37	-1.70139	0.109021	0.203476	-4.94329
Bahd1	-1.87353	2.31626	-2.8274	0.0125094	0.0580468	-3.01592
Chst14	-0.883405	0.894611	-1.52134	0.148493	0.249808	-5.19747
Ccdc32	-0.341924	5.91895	-1.61122	0.127486	0.225563	-5.07306
Rpusd2	0.696198	2.6312	1.78444	0.0941155	0.185219	-4.81959
Knl1	-0.605089	8.29945	-3.55852	0.00276767	0.02753	-1.60467
Rad51	-0.803352	6.33687	-4.03365	0.00103629	0.0187076	-0.675119
Rmdn3	-0.11039	6.2077	-0.643907	0.529134	0.630258	-6.09471
Gchfr	-0.680745	-1.35659	-2.86227	0.0116505	0.055734	-2.95011
Dnajc17	0.11969	4.14693	0.348392	0.732275	0.800953	-6.2431
Zfyve19	0.885132	3.26851	2.99341	0.00890638	0.0486069	-2.7008
Spint1	-0.448304	-1.13698	-1.20015	0.248266	0.358351	-5.59721
Vps18	0.57478	2.55822	1.33088	0.202648	0.30957	-5.44341
Gm14207	-0.41645	-1.55989	-2.12426	0.050272	0.126311	-4.27666
Chac1	-3.21012	1.75597	-5.0091	0.000145022	0.00966062	1.18981
Ino80	0.318859	5.78331	2.07828	0.0548424	0.133315	-4.35326
Exd1	-0.333913	-1.01011	-0.922874	0.370344	0.481226	-5.87874
Chp1	-1.07818	4.5188	-5.64744	4.24192e-05	0.0077765	2.34955
Oip5os1	-0.610617	7.08768	-3.28187	0.00491135	0.0361785	-2.14445
Oip5	-0.473118	4.89868	-1.78419	0.0941574	0.185261	-4.81997
Nusap1	-1.91965	8.01748	-3.82628	0.00158944	0.0220779	-1.0804
Ndufaf1	0.159899	4.87481	0.851924	0.407344	0.516843	-5.94034
Rtf1	-0.519915	6.50147	-2.95814	0.00957513	0.0502347	-2.76813
Itpka	-0.342261	-1.21855	-1.08056	0.29657	0.40797	-5.72637
Rpap1	0.103189	3.47565	0.318157	0.754651	0.818611	-6.2534
Mga	0.32151	5.27995	1.58471	0.133403	0.232308	-5.11029
Mapkbp1	0.798151	1.74781	1.79548	0.0922756	0.182934	-4.80286
Jmjd7	-1.23144	2.59572	-1.56763	0.137336	0.236709	-5.13404
Pla2g4b	-0.983666	-0.249314	-2.04348	0.0585504	0.138563	-4.41061
Ehd4	-0.000859221	5.06712	-0.00545799	0.995715	0.996994	-6.30535
Vps39	-1.70425	2.95335	-2.19806	0.0436642	0.1155	-4.15189
Tmem87a	-0.0602966	5.49294	-0.394274	0.698799	0.776088	-6.22571
Ganc	-0.62511	4.72532	-1.92004	0.0736213	0.158619	-4.60964
Capn3	-1.05753	-1.06676	-3.24241	0.00532929	0.0372397	-2.22105
Zfp106	0.572191	6.91388	2.46277	0.0260486	0.0860541	-3.68799
Snap23	-0.0237448	5.65864	-0.181476	0.858367	0.89869	-6.28842
Lrrc57	-0.528746	3.87287	-2.13221	0.0495177	0.12541	-4.26332
Haus2	-0.712686	4.75538	-2.88658	0.0110862	0.0541914	-2.90412
Stard9	-0.880227	0.767778	-1.58032	0.134404	0.233618	-5.11641
Cdan1	0.0130153	4.18966	0.0449326	0.96474	0.976421	-6.30433
Ttbk2	-1.30713	1.22505	-2.27965	0.0373033	0.105792	-4.01151
AV039307	-0.635248	-0.993172	-1.65198	0.118831	0.215403	-5.01501
Ubr1	-0.337369	6.09849	-2.6713	0.017167	0.068617	-3.30751
Tmem62	0.502572	2.10557	1.29725	0.213692	0.321405	-5.48419
Ccndbp1	-0.492107	5.9686	-1.9922	0.0644342	0.145977	-4.49416
Epb42	-2.23619	6.24564	-5.52869	5.31074e-05	0.00843653	2.13819
Lcmt2	-1.70373	2.67337	-2.32669	0.03404	0.100121	-3.92946
Adal	-2.19676	2.72375	-3.20423	0.00576713	0.0387288	-2.29503
Zscan29	-1.86724	2.19909	-2.94466	0.00984337	0.0509032	-2.7938
Tubgcp4	-0.469929	4.86821	-2.10611	0.0520328	0.129241	-4.30701
Trp53bp1	-0.411125	3.86312	-2.1164	0.051027	0.127524	-4.28981
Map1a	-0.732365	-1.31688	-2.55459	0.0216997	0.0776822	-3.52189
Ppip5k1	0.253635	3.19449	0.907881	0.377966	0.488645	-5.89213
Catsper2	-1.86982	0.52378	-3.52034	0.00299572	0.0285711	-1.67935
Pdia3	0.0175902	8.55033	0.130337	0.897992	0.929928	-6.29662
Serinc4	-0.864928	-1.21491	-3.23637	0.00539627	0.0375035	-2.23276
Serf2	-0.512935	9.55653	-2.17312	0.0458016	0.118946	-4.1943
Hypk	0.1014	6.35405	0.366955	0.718659	0.791091	-6.23632
Mfap1b	-0.261258	4.3363	-1.46995	0.161761	0.264855	-5.26626
Mfap1a	-0.318324	4.78865	-2.158	0.0471441	0.121054	-4.21989
Wdr76	-0.902009	6.74995	-3.94799	0.00123625	0.0201175	-0.842363
Frmd5	-1.03398	1.32204	-1.38248	0.186598	0.292128	-5.37926
Casc4	0.858979	4.53103	3.03152	0.00823533	0.046737	-2.62786
Ctdspl2	-0.485937	6.01995	-2.77324	0.0139662	0.061863	-3.11765
Eif3j1	-0.290364	7.28275	-1.16803	0.260605	0.371696	-5.633
Spg11	-0.0529173	3.61482	-0.259008	0.799068	0.852198	-6.27089
Patl2	-1.51738	0.0482367	-3.25785	0.00516167	0.0367971	-2.19109
B2m	-0.396383	9.0454	-2.04601	0.0582741	0.138122	-4.40647
Trim69	-0.813129	-0.85634	-2.23781	0.0404491	0.11048	-4.08382
Terb2	-0.346062	-1.61404	-1.39036	0.184241	0.289642	-5.3693
Sord	-0.587315	4.84625	-1.71868	0.105757	0.199367	-4.91785
Shf	-1.56063	2.62426	-1.93072	0.0721907	0.156727	-4.5927
Slc28a2	-1.81646	-0.0845453	-3.35898	0.00418618	0.0333739	-1.9944
Gatm	0.575119	6.9156	3.38128	0.00399707	0.0326574	-1.95094
Spata5l1	-0.553762	0.0874374	-1.15456	0.265919	0.376894	-5.64778
AA467197	-1.48327	1.35604	-2.36962	0.031298	0.0951855	-3.85393
Bloc1s6os	-1.2305	-0.933699	-3.60097	0.00253444	0.0263046	-1.52158
Bloc1s6	0.039946	4.3273	0.155524	0.878434	0.913574	-6.29292
Sqor	-0.851252	1.04261	-1.38157	0.186872	0.292433	-5.38041
Sema6d	-0.18699	-1.33799	-0.616418	0.546647	0.645824	-6.11209
Slc24a5	-2.74487	1.76385	-3.70518	0.00204216	0.0237951	-1.31753
Myef2	-0.464156	5.98324	-3.10248	0.00711554	0.0435064	-2.49153
Dut	0.0750361	10.1775	0.435874	0.668992	0.750919	-6.20812
Cep152	-0.493891	5.48878	-2.78429	0.0136564	0.061093	-3.09696
Shc4	-0.853312	3.38072	-2.262	0.0386012	0.107699	-4.04209
Eid1	-0.554907	7.83177	-2.08276	0.0543808	0.13289	-4.34583
Secisbp2l	-0.846702	5.06118	-2.94688	0.00979882	0.0508149	-2.78958
Cops2	-0.132689	6.93808	-1.1945	0.250403	0.360733	-5.60356
Galk2	-1.13376	2.43844	-1.46575	0.162889	0.266054	-5.27181
Fam227b	-0.774731	-0.885877	-1.59948	0.130078	0.228666	-5.0896
Dtwd1	-0.506176	5.18622	-1.59818	0.130368	0.229066	-5.09143
Atp8b4	-0.316838	3.64657	-0.938948	0.36229	0.473835	-5.86418
Hdc	-1.62656	1.56221	-2.53698	0.0224758	0.0791619	-3.55391
Gabpb1	-0.896146	4.87794	-3.78719	0.00172326	0.0228231	-1.15692
Gm27003	-1.27311	1.19439	-2.22205	0.0416967	0.112326	-4.11088
Usp8	-2.68333	4.73527	-2.81916	0.0127211	0.0586555	-3.03144
Usp50	0.265943	4.19315	0.516327	0.61298	0.703062	-6.16925
Trpm7	-0.126127	6.66681	-0.71653	0.484418	0.58969	-6.04535
Sppl2a	-0.290303	6.39	-1.80654	0.0904631	0.180492	-4.78602
Ap4e1	-0.161613	3.68637	-0.630996	0.53732	0.637689	-6.10296
Blvra	-0.66829	6.41416	-3.27758	0.00495514	0.0363511	-2.15278
Ncaph	-0.987635	5.94983	-3.89825	0.00136983	0.0206534	-0.939584
Itpripl1	0.421873	3.61198	1.20957	0.244731	0.354354	-5.58655
1810024B03Rik	0.384301	3.44507	0.790783	0.441111	0.548696	-5.98983
Snrnp200	0.101534	6.04434	0.739341	0.470849	0.57678	-6.02884
Ciao1	-0.342054	5.30248	-1.74193	0.101505	0.194104	-4.88338
Tmem127	-0.687421	4.39649	-2.70907	0.0159062	0.066128	-3.23744
Stard7	0.348522	5.86691	2.08144	0.0545161	0.133045	-4.34802
Dusp2	-1.39664	0.122527	-2.43264	0.027648	0.0888617	-3.74197
Fahd2a	-1.7579	2.17603	-2.70867	0.015919	0.0661442	-3.23818
Kcnip3	-0.663092	-0.971754	-1.43459	0.171451	0.275032	-5.31257
Zfp661	-0.123519	-0.45838	-0.264753	0.79472	0.848782	-6.26935
Mrps5	-0.0665904	7.02992	-0.289427	0.776125	0.834818	-6.26234
Nphp1	-1.54867	2.53546	-2.13908	0.0488749	0.124122	-4.25177
Mtln	0.50668	5.24994	1.59075	0.132034	0.230737	-5.10185
Bub1	-0.372286	6.69453	-2.22567	0.0414069	0.111871	-4.10467
Acoxl	-0.878364	-0.591299	-1.99805	0.0637363	0.14515	-4.48469
Bcl2l11	-0.322955	5.07115	-1.81452	0.0891765	0.179066	-4.77384
Morrbid	-1.57788	2.08884	-2.25738	0.0389479	0.108139	-4.05008
Gm39929	-1.43216	-0.0173168	-2.63325	0.0185342	0.0714475	-3.37777
Anapc1	-0.164957	6.25566	-0.850674	0.408017	0.51752	-5.94138
Mertk	-0.716122	-1.32938	-2.18263	0.0449757	0.117561	-4.17816
Tmem87b	0.0844166	2.88413	0.20086	0.843443	0.888211	-6.28462
Zc3h8	-1.27448	2.85363	-1.50446	0.152748	0.254855	-5.22026
Gm10762	0.399094	3.22731	1.23715	0.234612	0.343378	-5.55498
Zc3h6	-2.17528	2.78222	-3.14463	0.00652296	0.0413654	-2.41028
Gm14027	-0.474024	-1.11719	-1.43046	0.172613	0.276333	-5.31792
Ttl	-1.36954	0.215744	-2.49525	0.0244231	0.0829207	-3.62951
Polr1b	0.10174	3.91376	0.298059	0.769652	0.830326	-6.25974
Chchd5	0.134907	3.65862	0.516435	0.612906	0.703062	-6.1692
Slc20a1	-0.938342	5.66768	-3.90454	0.00135216	0.0205122	-0.927286
9830144P21Rik	-2.96306	0.39904	-9.06163	1.48372e-07	0.00128764	7.49167
A730036I17Rik	-2.26125	2.35036	-3.41899	0.00369653	0.0315771	-1.87739
Ckap2l	-0.965874	6.83681	-4.14233	0.000829	0.0171123	-0.463442
Gm14023	-1.89794	2.189	-2.92368	0.0102758	0.0519785	-2.83371
Il1a	0.0563616	-1.52518	0.182396	0.857658	0.898205	-6.28825
Il1b	-1.51882	2.50588	-2.02267	0.0608768	0.141453	-4.44467
Il1bos	-1.37921	-0.0580478	-3.03324	0.00820632	0.0466984	-2.62457
Sirpa	-2.98617	1.38251	-5.30449	8.15812e-05	0.00843653	1.73356
Stk35	-0.0670742	3.69622	-0.193586	0.849037	0.892326	-6.28609
Tgm3	-0.400333	-1.57229	-1.52162	0.148423	0.249748	-5.19709
Snrpb	0.0195066	8.91132	0.133856	0.895254	0.927482	-6.29615
Tmc2	-0.162704	-1.14181	-0.400639	0.694204	0.772298	-6.22313
Nop56	0.320066	7.85808	1.77023	0.0965305	0.187729	-4.84102
Idh3b	-0.00128358	6.62706	-0.00864098	0.993217	0.995356	-6.30533
Pced1a	-2.64908	0.555929	-6.74905	5.77931e-06	0.00442445	4.20641
Vps16	-0.0722605	4.31811	-0.309724	0.760933	0.823256	-6.25611
Ptpra	-0.276404	6.58987	-1.5168	0.149629	0.251206	-5.20362
4930473A02Rik	-1.26012	-0.297641	-3.12403	0.00680628	0.0422339	-2.45002
Mrps26	0.348334	6.71831	2.23206	0.0408997	0.111078	-4.0937
Ubox5	-1.40649	2.19085	-2.03523	0.0594628	0.139755	-4.42414
Fastkd5	-1.06004	1.9957	-1.45753	0.165111	0.26851	-5.28262
Lzts3	-0.469931	-0.905478	-1.10152	0.287634	0.398734	-5.70455
Ddrgk1	-2.50768	5.01784	-2.42137	0.0282696	0.0898051	-3.76208
Itpa	0.0316025	6.71436	0.182521	0.857561	0.898205	-6.28823
4930402H24Rik	-0.280983	5.11032	-1.23808	0.234276	0.343002	-5.5539
A730017L22Rik	0.438788	0.232561	0.668237	0.5139	0.616722	-6.07873
Atrn	-0.497227	4.63823	-2.19355	0.044044	0.116022	-4.15958
Adam33	-1.94208	1.12	-2.21953	0.0418989	0.112599	-4.11519
Hspa12b	-0.00385555	-1.47886	-0.0114326	0.991026	0.993909	-6.3053
1700037H04Rik	-0.846037	6.4235	-2.82899	0.0124688	0.0579313	-3.01292
Gm14232	-0.40417	-1.56934	-1.29747	0.213618	0.321359	-5.48392
Spef1	-2.01414	0.543359	-3.3651	0.00413344	0.0332223	-1.98248
Cenpb	-3.10899	4.43069	-3.67818	0.00215964	0.0243222	-1.3704
Cdc25b	-3.89079	5.46218	-4.071	0.000959696	0.0179365	-0.602301
Ap5s1	-2.33262	2.65754	-3.04498	0.00801034	0.0462409	-2.60205
Mavs	-1.09362	3.31265	-2.50199	0.0240981	0.0822186	-3.61733
Pank2	-0.628314	5.8774	-3.47872	0.00326583	0.0299093	-1.76073
Rnf24	0.246733	4.53478	0.793567	0.439536	0.547103	-5.98765
Smox	-3.8371	6.11481	-3.50263	0.0031078	0.0291339	-1.71398
Prnp	-1.13916	5.01629	-3.21845	0.00560003	0.0380574	-2.26749
Rassf2	0.770722	0.948553	1.15412	0.266093	0.377033	-5.64826
Slc23a2	-1.31848	1.70869	-1.97597	0.066405	0.148977	-4.52035
Tmem230	-0.0840094	4.04229	-0.314648	0.757263	0.820603	-6.25454
Pcna	-0.502668	9.1877	-2.50009	0.024189	0.0824151	-3.62076
AV099323	-2.04296	3.14938	-2.65291	0.0178153	0.0701039	-3.34152
Cds2	0.758163	3.42653	2.43601	0.0274644	0.0884782	-3.73594
Gpcpd1	-1.40205	5.5407	-4.65522	0.000292828	0.0119945	0.523966
AU019990	0.547467	-1.37294	1.19569	0.249952	0.360294	-5.60223
Shld1	-2.31609	2.94195	-3.21429	0.00564851	0.0382302	-2.27557
Trmt6	0.326187	5.60413	1.31867	0.206606	0.313869	-5.45832
Mcm8	-0.454345	4.3453	-2.42415	0.0281148	0.0895338	-3.75712
Crls1	0.387339	4.87037	2.33925	0.0332157	0.0987147	-3.90744
Tmx4	-0.239609	5.74792	-1.17337	0.258521	0.36941	-5.62711
Plcb1	-0.457419	1.17821	-0.624556	0.541429	0.6415	-6.10702
Plcb4	0.567279	4.37635	1.91172	0.0747527	0.160254	-4.62279
Gm14211	0.00391147	-1.48483	0.012444	0.990232	0.993389	-6.30529
Mkks	-1.30681	1.36172	-2.17153	0.0459412	0.119162	-4.197
Slx4ip	-1.07978	5.28607	-4.32265	0.000573497	0.0146548	-0.113818
Jag1	-0.404418	-1.56915	-1.93112	0.0721381	0.156722	-4.59207
Btbd3	0.182868	-1.09248	0.380663	0.708667	0.783759	-6.23109
Tasp1	-0.0902634	5.33749	-0.558382	0.584633	0.679113	-6.14642
Esf1	-0.320218	6.32378	-1.29241	0.215323	0.323267	-5.49
Ndufaf5	-1.64997	2.64965	-2.2404	0.0402468	0.110319	-4.07935
Macrod2	0.549572	3.66133	2.12956	0.0497683	0.125686	-4.26777
Kif16b	1.14282	2.86911	3.4751	0.00329042	0.0299193	-1.7678
Kif16bos	-0.299817	-1.64961	-1.14464	0.269883	0.380801	-5.65857
Snrpb2	-0.100565	6.9426	-0.479482	0.638351	0.72537	-6.18784
Dstn	-0.296024	5.07332	-0.767643	0.454339	0.561287	-6.00767
Rrbp1	0.246485	6.32391	1.20596	0.246083	0.355928	-5.59065
Gm5535	-0.354346	-0.733406	-0.777796	0.448505	0.555791	-5.9999
Snx5	0.201323	7.22949	1.42797	0.173319	0.277255	-5.32115
Mgme1	0.223045	4.25096	1.11334	0.282681	0.393687	-5.69209
Kat14	0.176073	3.73901	0.731875	0.475265	0.580653	-6.0343
Polr3f	-0.193775	4.35842	-0.849377	0.408716	0.517994	-5.94247
Rbbp9	-0.672441	1.24631	-0.973842	0.345223	0.456835	-5.83179
Sec23b	-0.360304	5.36736	-2.34294	0.0329767	0.0982605	-3.90095
Smim26	0.735257	4.99071	2.22387	0.0415503	0.112089	-4.10775
Dtd1	0.886533	6.35359	4.08288	0.000936551	0.0177203	-0.579148
Slc24a3	0.0880597	0.308385	0.108459	0.915036	0.941984	-6.29931
Rin2	-2.01905	-0.32712	-5.65441	4.18657e-05	0.0077765	2.36189
Naa20	0.35318	5.95866	2.1608	0.0468925	0.120801	-4.21515
Crnkl1	-0.0248223	6.18711	-0.167253	0.869353	0.907198	-6.29097
Cfap61	-0.123642	-1.38671	-0.379926	0.709202	0.784117	-6.23137
Ralgapa2	-0.668949	5.71607	-3.12872	0.0067407	0.0420918	-2.44097
Kiz	0.0517667	4.49255	0.213681	0.833606	0.880466	-6.28189
Xrn2	0.248695	7.33122	1.54951	0.141616	0.241683	-5.15903
Thbd	-0.398883	-1.57341	-1.51068	0.151169	0.253109	-5.21189
Cd93	-1.58047	-0.0512186	-3.74199	0.00189224	0.0234293	-1.24542
Nxt1	-0.574981	6.70249	-2.40853	0.0289943	0.0911979	-3.78496
Gzf1	-2.03627	3.76769	-2.36542	0.0315574	0.0956271	-3.86136
Napb	-0.483755	-1.50812	-1.62019	0.125537	0.223024	-5.06037
Cst3	-0.285046	6.94827	-1.15899	0.264163	0.375406	-5.64294
Zfp120	0.138868	3.38125	0.445954	0.661853	0.745163	-6.2036
3300002I08Rik	-0.751195	-0.373967	-1.18836	0.252744	0.363187	-5.61045
Gm10130	-0.66208	0.823097	-1.0431	0.313044	0.425108	-5.76445
Zfp442	-0.778613	-1.28131	-2.97337	0.0092805	0.0495841	-2.73907
Cst7	1.38583	1.80856	2.55558	0.0216566	0.0775482	-3.52007
Apmap	-2.36548	4.04248	-2.74669	0.0147393	0.0635774	-3.16732
Gm14123	0.747298	-1.22953	1.30441	0.211304	0.318817	-5.47558
Acss1	-1.06209	5.89605	-2.80021	0.0132212	0.0598809	-3.06706
E130215H24Rik	-1.50214	2.28703	-2.0636	0.0563798	0.135376	-4.37752
Entpd6	0.679496	2.85725	1.74553	0.10086	0.193321	-4.87802
Pygb	-1.48982	1.96981	-2.22041	0.0418282	0.112491	-4.11369
Abhd12	-0.38246	4.02309	-1.84854	0.083868	0.172296	-4.72152
Gins1	-0.575921	6.25523	-2.53484	0.0225722	0.0792725	-3.55781
Ninl	-0.224929	5.4584	-0.980924	0.34183	0.45349	-5.82509
Nanp	-0.450282	6.50122	-2.00374	0.0630648	0.144397	-4.47546
Nsfl1c	0.474652	6.45066	3.03609	0.00815827	0.0466128	-2.6191
Gm14167	-0.0542231	-1.44011	-0.140353	0.890205	0.923543	-6.29523
Fkbp1a	0.120697	4.4726	0.316027	0.756236	0.81973	-6.25409
Psmf1	-0.759667	7.15047	-2.97247	0.00929774	0.0496047	-2.7408
Gm14154	-0.561668	-1.44819	-1.65001	0.119236	0.215881	-5.01782
Fam110a	-2.45083	2.28094	-4.05305	0.000995765	0.0182651	-0.637289
Slc52a3	0.460458	-0.395608	0.729364	0.476755	0.582042	-6.03612
Srxn1	-2.17469	2.13846	-3.50713	0.00307896	0.0289845	-1.70519
Tcf15	-0.0637667	-0.902758	-0.124924	0.902205	0.932792	-6.29734
Csnk2a1	-0.0776831	7.47636	-0.530764	0.603173	0.694663	-6.16161
Tbc1d20	0.49654	4.05605	2.72011	0.0155546	0.0653819	-3.21688
Rbck1	0.407363	5.54429	2.03104	0.0599315	0.140323	-4.431
Trib3	-2.87449	2.73782	-4.10815	0.000889212	0.0174556	-0.529953
Gm14164	-1.81295	2.60721	-2.53342	0.0226362	0.0793684	-3.56039
Sox12	-1.87415	2.93573	-2.50181	0.0241068	0.0822294	-3.61766
Zcchc3	-0.110734	4.1436	-0.399672	0.694901	0.772737	-6.22352
6820408C15Rik	-0.819382	-0.321516	-1.58514	0.133305	0.232274	-5.10969
H13	0.102848	5.69636	0.534891	0.600384	0.692528	-6.15938
Mcts2	-0.463761	-1.12509	-0.735965	0.472843	0.578695	-6.03131
Id1	-1.48404	2.06821	-2.04933	0.0579115	0.137811	-4.40101
Cox4i2	-0.162156	-1.35709	-0.514813	0.614012	0.703952	-6.17004
Bcl2l1	-2.40074	3.11012	-3.37732	0.00403001	0.0327871	-1.95865
Tpx2	-0.82896	8.25422	-4.26616	0.000643494	0.0154144	-0.223101
Ttll9	-0.635605	-1.39131	-2.0107	0.0622524	0.143248	-4.46416
Pdrg1	0.463975	5.0318	1.88795	0.0780722	0.164807	-4.66017
Ccm2l	-0.722794	-1.32424	-2.52237	0.0231403	0.0803004	-3.58045
Hck	0.404978	2.03332	0.672376	0.511333	0.614686	-6.07595
Tm9sf4	-0.0890014	5.15524	-0.427181	0.675175	0.756427	-6.21194
Tspyl3	-1.4881	0.0257083	-3.39844	0.00385742	0.0321545	-1.91748
Plagl2	-0.515404	5.36745	-2.29942	0.0358981	0.103491	-3.97714
Pofut1	-0.659895	4.49963	-3.3378	0.00437409	0.0339993	-2.03567
Kif3b	-0.0180341	3.83953	-0.0778113	0.938983	0.959042	-6.30225
2500004C02Rik	-1.45504	2.2296	-2.02788	0.0602861	0.140797	-4.43615
Asxl1	0.229376	6.34537	1.74652	0.100684	0.193071	-4.87655
Nol4l	-2.48838	3.47756	-3.32311	0.00450923	0.0344847	-2.06425
Commd7	0.43009	5.47482	2.27029	0.0379862	0.106804	-4.02774
Dnmt3b	-0.703285	2.02481	-0.85841	0.403863	0.51357	-5.93489
Dnmt3c	-1.13089	2.52802	-1.41645	0.176604	0.281011	-5.33599
Mapre1	-0.0333186	7.46124	-0.352648	0.729145	0.798718	-6.24157
Efcab8	0.687033	0.15022	0.861321	0.402308	0.511881	-5.93244
Cdk5rap1	-2.04866	2.90407	-2.84508	0.0120665	0.0570457	-2.98259
Snta1	-0.282679	-0.734364	-0.548376	0.591316	0.684768	-6.152
Cbfa2t2	-2.21805	4.09886	-2.46727	0.0258172	0.0856488	-3.6799
Necab3	-1.0232	0.893654	-1.75265	0.0995957	0.191827	-4.8674
1700003F12Rik	-0.289187	-1.25937	-0.732456	0.47492	0.580438	-6.03387
E2f1	-0.869309	5.74744	-3.14973	0.00645457	0.0411632	-2.40043
Pxmp4	-0.527788	4.3709	-1.96311	0.0680055	0.151088	-4.54102
4930519P11Rik	-0.0889238	-1.41342	-0.29268	0.773684	0.83295	-6.26137
Zfp341	-0.681793	3.07367	-1.58362	0.133651	0.232712	-5.11181
Gm14198	-2.87494	3.42566	-3.82935	0.00157938	0.0220779	-1.07439
Chmp4b	-0.86665	7.13	-3.65043	0.00228749	0.0249286	-1.42475
Raly	-0.187982	7.95076	-1.02945	0.31921	0.430824	-5.77804
a	-2.61724	1.58195	-3.64881	0.00229515	0.0249754	-1.42791
Eif2s2	-0.670892	8.90617	-2.89259	0.0109507	0.0538668	-2.89272
Ahcy	-0.193496	4.07161	-0.694347	0.497834	0.601876	-6.06095
Gm45609	-0.59157	-1.02677	-1.47308	0.160926	0.263925	-5.26212
Itch	-0.0624392	6.07068	-0.395053	0.698236	0.775521	-6.22539
Dynlrb1	0.0271871	7.1484	0.166772	0.869725	0.907249	-6.29106
Map1lc3a	-0.50213	3.8324	-1.65334	0.118551	0.215052	-5.01305
Pigu	-0.227576	4.67003	-0.878551	0.393182	0.503051	-5.91774
Trp53inp2	-1.33864	-0.237241	-3.51618	0.00302169	0.0287449	-1.68749
Ncoa6	0.0544464	5.32512	0.370196	0.716292	0.789247	-6.2351
Acss2	-0.432531	4.68048	-1.67621	0.113928	0.209512	-4.98001
Gss	0.319594	4.46302	1.81144	0.0896721	0.1796	-4.77856
Myh7b	-1.70441	-0.170736	-3.64165	0.00232949	0.0251544	-1.44194
Trpc4ap	0.490816	4.97402	2.54026	0.0223292	0.0788707	-3.54795
Edem2	0.0240545	4.30697	0.0807733	0.936665	0.957269	-6.30201
BC029722	-0.628961	1.4089	-0.893878	0.38518	0.495336	-5.90445
Eif6	0.340497	6.63175	1.97006	0.0671355	0.149919	-4.52985
Uqcc1	0.0592843	4.84361	0.265549	0.794118	0.848383	-6.26913
Cep250	-0.358744	4.87898	-2.3335	0.0335906	0.0993513	-3.91753
6430550D23Rik	-1.97436	1.87522	-3.39213	0.00390819	0.0323956	-1.92978
Ergic3	-0.137285	5.66366	-0.691519	0.499559	0.603421	-6.06291
Fer1l4	-0.5097	-1.08975	-1.19242	0.251194	0.361381	-5.6059
Spag4	-0.92966	-0.55184	-1.63939	0.12145	0.218013	-5.03305
Cpne1	-0.684767	5.33437	-2.24339	0.0400153	0.110001	-4.07421
Nfs1	0.00925067	5.76248	0.0701441	0.944984	0.963181	-6.30284
Romo1	-0.0951464	7.73638	-0.338478	0.739586	0.806519	-6.24658
Rbm39	-0.466688	8.6776	-3.08033	0.00744801	0.044673	-2.53416
Phf20	0.115334	4.39795	0.406966	0.689648	0.76869	-6.22052
Scand1	-0.0790982	7.25352	-0.491003	0.630366	0.718279	-6.18217
Cnbd2	-1.00803	1.22942	-1.65676	0.117849	0.214233	-5.00812
2900097C17Rik	-0.312586	4.96179	-0.936102	0.363707	0.475017	-5.86677
Epb41l1	-0.588828	-1.42729	-2.03263	0.0597532	0.140105	-4.42839
Aar2	-0.292138	3.37907	-0.976978	0.343718	0.45525	-5.82883
Gm14168	0.782274	-0.7923	1.49098	0.156217	0.258622	-5.23832
Dlgap4	-1.29369	1.7242	-2.00326	0.0631216	0.144486	-4.47625
4930405A21Rik	-1.09005	-0.643322	-2.60285	0.019701	0.0737717	-3.43365
Myl9	0.00266204	-1.48387	0.0083969	0.993408	0.995356	-6.30533
Gm14230	-0.812603	-1.25516	-2.52313	0.023105	0.0802649	-3.57905
Tgif2	-0.386067	1.62335	-0.465559	0.648064	0.733091	-6.19452
5430405H02Rik	-2.16691	2.16397	-3.51765	0.00301251	0.0286759	-1.68462
Rab5if	0.30956	7.69926	2.15065	0.0478099	0.122172	-4.2323
Sla2	-0.0129539	-0.904581	-0.0210837	0.98345	0.98872	-6.30514
Ndrg3	-0.608776	4.51373	-3.26474	0.00508861	0.0367077	-2.17772
Dsn1	-0.357931	5.01611	-1.82051	0.0882207	0.177652	-4.76468
Soga1	-0.628527	1.36662	-0.848088	0.409412	0.518623	-5.94354
Samhd1	-2.80366	5.42801	-2.62349	0.0189015	0.0722009	-3.39574
Rbl1	-0.860517	6.53123	-3.19557	0.00587141	0.0390926	-2.31182
Mroh8	-0.532091	-1.07252	-1.31122	0.209048	0.316553	-5.46735
Rpn2	-0.236045	6.46436	-1.40875	0.178831	0.283501	-5.34587
Manbal	-0.155384	4.79863	-0.924042	0.369755	0.480798	-5.87769
Src	-0.369754	-1.59581	-1.45742	0.165142	0.26851	-5.28277
Gm14286	0.0492873	-1.51974	0.16685	0.869665	0.907249	-6.29104
Blcap	-1.04322	1.53152	-1.61864	0.125873	0.223421	-5.06258
Platr27	-1.47263	-0.747443	-3.34027	0.00435171	0.0339456	-2.03085
Ctnnbl1	0.169052	5.24688	1.09258	0.29142	0.402304	-5.7139
Tti1	-0.390898	3.66724	-1.49167	0.156038	0.258454	-5.2374
Rprd1b	-0.34067	6.70994	-2.56584	0.0212173	0.0766418	-3.50138
2010009K17Rik	-0.901791	-1.18655	-2.83601	0.0122918	0.0575433	-2.9997
Tgm2	-3.64116	3.53412	-5.46606	5.98336e-05	0.00843653	2.0259
Lbp	-0.787166	1.05952	-1.1043	0.286463	0.397386	-5.70163
Snhg17	0.978383	2.86253	1.97292	0.0667812	0.149399	-4.52526
Ralgapb	-0.522434	4.9028	-1.95401	0.0691582	0.152733	-4.55558
Arhgap40	-0.730857	-1.31804	-1.47128	0.161406	0.264504	-5.2645
Actr5	-0.00822184	4.10626	-0.0328215	0.97424	0.982259	-6.30482
Ppp1r16b	-0.375789	-1.19276	-0.850134	0.408308	0.517756	-5.94184
Fam83d	-0.595856	3.96184	-2.27988	0.0372866	0.105792	-4.01111
Dhx35	-1.34474	2.59866	-1.75095	0.0998965	0.192182	-4.86994
Mafb	-0.233755	-0.076459	-0.374713	0.712997	0.786553	-6.23338
Gm14221	-0.585026	-1.43022	-2.40134	0.0294077	0.0917775	-3.79774
Top1	-0.801108	8.47974	-3.62562	0.00240819	0.0256039	-1.47333
Plcg1	-0.933444	0.3795	-1.92888	0.0724348	0.156907	-4.59562
Zhx3	-2.05064	2.843	-2.84145	0.0121561	0.0572863	-2.98943
Gm16751	-0.861539	-1.21752	-2.8409	0.0121698	0.0573146	-2.99048
Chd6	0.134675	5.44	0.947117	0.358243	0.469786	-5.85669
Srsf6	0.288212	7.63598	2.44033	0.0272309	0.0880624	-3.72821
L3mbtl1	-0.851005	-1.22562	-3.09995	0.00715286	0.0436266	-2.49642
Ift52	0.0939741	4.39201	0.354869	0.727514	0.797634	-6.24077
Mybl2	-1.26827	5.75174	-3.72979	0.00194069	0.0235183	-1.26933
Tox2	-0.504126	-1.49245	-1.84463	0.0844639	0.17293	-4.72757
Oser1	-0.419191	4.84888	-1.55106	0.141246	0.241286	-5.1569
2900093K20Rik	-1.07216	1.13854	-1.63517	0.122339	0.219195	-5.03908
Fitm2	-1.26281	1.92064	-1.79842	0.0917912	0.182333	-4.79839
2310001K24Rik	-0.625651	-1.39897	-2.4033	0.0292941	0.0916158	-3.79425
Hnf4a	0.824622	-1.18772	1.93884	0.0711208	0.155161	-4.5798
Ttpal	0.145227	3.60326	0.657094	0.520846	0.623341	-6.08612
Serinc3	-0.907075	8.2593	-3.95415	0.00122064	0.0200737	-0.83032
0610039K10Rik	-0.949547	-0.751404	-2.4035	0.0292827	0.0916158	-3.79389
Pkig	-0.37886	7.87626	-2.27218	0.0378475	0.10666	-4.02447
Gm16316	-0.143379	0.216865	-0.253742	0.80306	0.855427	-6.27227
Ada	-1.15353	2.43856	-1.45412	0.166041	0.269355	-5.2871
Ywhab	-0.157951	7.4443	-1.00936	0.328438	0.440006	-5.79776
Pabpc1l	-0.521199	-0.550887	-0.941892	0.360828	0.472256	-5.86148
Tomm34	0.410322	4.94554	2.47952	0.025198	0.0845123	-3.65787
Stk4	0.500366	5.88696	2.66087	0.0175317	0.0694751	-3.3268
Slpi	-0.113964	4.41127	-0.380126	0.709057	0.784015	-6.23129
Sdc4	-0.688174	-1.35087	-2.19194	0.04418	0.116221	-4.16232
Sys1	0.351189	6.33981	2.55081	0.0218642	0.077922	-3.52877
Dbndd2	0.0346085	0.0799516	0.0637659	0.949979	0.9669	-6.30328
Pigt	0.106943	4.50751	0.455647	0.65502	0.739266	-6.19916
Wfdc3	-0.487121	-1.50553	-1.86964	0.0807197	0.168144	-4.68878
Dnttip1	-0.4309	5.85572	-1.86346	0.081631	0.169258	-4.6984
Gm11457	-0.935852	1.46626	-1.45585	0.165569	0.268979	-5.28483
Ube2c	-1.19584	9.75054	-3.2098	0.00570112	0.0384133	-2.28425
Snx21	-0.742557	0.017803	-1.59751	0.130517	0.22922	-5.09236
Acot8	-0.400874	4.30038	-2.06308	0.0564351	0.135453	-4.37838
Zswim3	-1.34436	2.1807	-1.90756	0.075325	0.160887	-4.62936
Zswim1	-1.1851	2.34047	-1.56981	0.136828	0.236162	-5.13101
Neurl2	-0.547377	-0.53075	-1.051	0.309513	0.421355	-5.75651
Ctsa	-0.167872	3.8939	-0.569118	0.577504	0.67321	-6.14031
Pltp	-1.0551	-1.06863	-3.35411	0.00422869	0.0334615	-2.0039
Pcif1	-0.484649	6.08667	-2.15861	0.0470896	0.120935	-4.21887
Zfp335	0.452139	3.45441	1.68884	0.111443	0.206463	-4.96164
Zfp335os	0.437454	2.73801	1.02942	0.319221	0.430824	-5.77807
Mmp9	-0.0259168	2.708	-0.050416	0.960441	0.974009	-6.30406
Ncoa5	0.222643	4.70127	0.911398	0.376168	0.486874	-5.889
Cd40	-0.94213	-1.15552	-2.53819	0.0224219	0.0790394	-3.55173
Slc35c2	0.720105	3.07217	1.71421	0.106593	0.200282	-4.92445
Elmo2	-1.66497	2.26237	-2.45752	0.0263207	0.0863433	-3.69741
Ocstamp	-0.503099	-1.49324	-1.86987	0.0806865	0.168114	-4.68843
Trp53rka	1.59369	2.93256	3.31617	0.00457453	0.0347687	-2.07776
Eya2	-0.0543024	-1.44005	-0.147576	0.884597	0.918689	-6.29416
Zmynd8	-0.124146	6.978	-1.13939	0.272001	0.383096	-5.66425
Gm11465	-0.353053	-1.60866	-1.39568	0.182662	0.287943	-5.36255
Gm11464	1.47609	-1.218	1.86982	0.0806938	0.168114	-4.68851
Ncoa3	-1.94442	2.58091	-2.88332	0.0111603	0.0543698	-2.91029
Sulf2	-1.51168	-0.717405	-4.14673	0.000821553	0.0169822	-0.454882
Prex1	-1.08926	5.24255	-3.36672	0.00411958	0.0331648	-1.97932
Trp53rkb	0.467351	2.81046	0.946818	0.358391	0.469893	-5.85696
Arfgef2	-0.236567	4.80391	-1.35192	0.195974	0.30243	-5.41748
Cse1l	0.0617693	6.30122	0.41876	0.681189	0.761495	-6.21556
Stau1	-0.0203164	5.17399	-0.138355	0.891757	0.9247	-6.29552
Ddx27	-0.220423	6.90998	-1.31193	0.208813	0.316282	-5.46649
Znfx1	-0.881521	4.61278	-2.96175	0.00950444	0.0501527	-2.76124
Zfas1	0.196581	6.76922	0.700959	0.493812	0.597648	-6.05635
Kcnb1	0.636004	-1.44104	1.39967	0.181485	0.286605	-5.35747
B4galt5	-0.296299	0.0373717	-0.451078	0.658237	0.742004	-6.20126
Slc9a8	-0.453246	4.42628	-2.36955	0.0313025	0.0951855	-3.85406
Spata2	-1.93965	2.39495	-2.95901	0.00955795	0.0502315	-2.76646
Rnf114	-0.155002	3.94833	-0.650018	0.525284	0.626578	-6.09075
Gm11476	-0.848948	-1.2272	-2.91655	0.0104268	0.0524205	-2.84726
Ube2v1	-0.345127	6.91817	-1.83559	0.0858551	0.174596	-4.74152
Tmem189	0.135102	3.92019	0.474835	0.641586	0.72793	-6.19009
Cebpb	-2.32327	4.28255	-2.51183	0.023631	0.0812421	-3.59954
9230111E07Rik	-0.844372	-1.23072	-2.68657	0.0166461	0.0674998	-3.27922
Ptpn1	0.54565	5.7073	2.88398	0.0111451	0.054336	-2.90903
Pard6b	-0.611422	-1.0115	-1.53601	0.144877	0.245607	-5.17751
E130018N17Rik	0.854509	-1.21071	2.04138	0.0587822	0.138839	-4.41407
Adnp	-0.309514	6.1648	-2.39813	0.029594	0.0920565	-3.80344
Dpm1	-0.158465	6.96704	-1.0346	0.316872	0.429003	-5.77293
Mocs3	-1.39723	2.25507	-1.96398	0.0678952	0.150895	-4.53961
Nfatc2	-1.46222	-0.755452	-3.42636	0.00364043	0.0313144	-1.863
Zfp64	0.726677	4.04036	2.38076	0.0306214	0.0940879	-3.83423
Tshz2	-0.481306	-1.51	-1.55092	0.141278	0.241286	-5.15709
Zfp217	0.330117	4.25128	1.23599	0.235034	0.343873	-5.55633
Pfdn4	0.34587	6.32254	1.58955	0.132306	0.231184	-5.10353
Fam210b	-1.53152	7.54087	-4.40294	0.000487134	0.0141012	0.0410736
Aurka	-0.675989	7.3534	-2.95226	0.0096913	0.0506112	-2.77933
Cstf1	0.317128	4.62692	1.58474	0.133394	0.232308	-5.11024
Cass4	-0.354168	-1.20939	-1.07298	0.299851	0.41111	-5.73417
Gm14455	-0.870373	-1.21072	-2.38016	0.0306575	0.0941124	-3.83529
Rtf2	-0.192174	6.35169	-1.01868	0.324132	0.435654	-5.78865
Gcnt7	-1.04524	-0.314951	-2.22677	0.0413194	0.111762	-4.10279
Fam209	0.0876547	-1.54925	0.252318	0.804141	0.856129	-6.27264
Rae1	0.391796	6.52879	2.06216	0.0565329	0.135583	-4.3799
Rbm38	-0.629953	6.75095	-2.03454	0.0595399	0.139779	-4.42527
Gm14453	-1.1289	-1.01185	-3.07808	0.00748254	0.0447172	-2.53848
Ctcflos	-0.477456	-1.51296	-1.96461	0.0678167	0.150759	-4.53861
Zbp1	-0.801181	0.0628984	-1.06433	0.303626	0.414865	-5.74301
Pmepa1	-0.438339	-1.54305	-1.45709	0.165232	0.268578	-5.2832
Rab22a	0.00976823	5.79102	0.0637357	0.950003	0.9669	-6.30328
Vapb	0.077151	5.13179	0.334557	0.742484	0.808966	-6.24793
Stx16	0.307681	5.33439	2.29143	0.03646	0.104501	-3.99105
Npepl1	0.990085	3.42422	2.61836	0.019097	0.0726108	-3.40516
Gnasas1	1.0889	2.98764	2.72505	0.0153999	0.0651832	-3.20768
Gnas	-0.452032	8.49222	-2.2835	0.0370252	0.105409	-4.00482
Gm20721	-1.61023	1.69265	-2.64211	0.0182068	0.0709316	-3.36145
Nelfcd	-1.01368	5.45203	-3.05769	0.00780359	0.045733	-2.57767
Ctsz	0.640577	5.40612	3.06532	0.00768196	0.0452881	-2.56302
Atp5e	-0.549504	8.42661	-1.7907	0.0930685	0.183909	-4.81011
Prelid3b	0.427335	7.12407	2.2912	0.036476	0.104506	-3.99144
Zfp831	-0.43065	1.13661	-0.605259	0.553846	0.651886	-6.11894
Gm14399	-0.63599	-0.462586	-1.29553	0.214269	0.322045	-5.48625
Gm14443	-0.669727	-1.36506	-2.21724	0.042084	0.112933	-4.11911
Gm14391	-0.512419	-1.48607	-2.06826	0.0558873	0.134737	-4.36983
Gm4631	-0.860828	-0.456805	-1.60762	0.128276	0.226574	-5.07814
Zfp968	0.89697	-0.772529	1.07927	0.297125	0.408392	-5.72769
Gm4724	-0.484889	-1.50725	-1.90362	0.0758691	0.161699	-4.63556
Zfp965	-0.668407	-1.36608	-2.8807	0.0112202	0.0545229	-2.91526
Gm6710	-0.883074	0.693172	-1.63062	0.123301	0.220543	-5.04555
Zfp966	-0.285475	-1.26223	-0.809217	0.430749	0.539154	-5.97526
Gm14308	-0.396461	-1.57527	-1.2631	0.225392	0.33392	-5.52475
Zfp973	0.278124	-0.868626	0.455059	0.655433	0.739677	-6.19943
Gm14305	-0.0734677	0.367522	-0.124711	0.90237	0.932807	-6.29736
Gm14295	-1.46069	0.117629	-2.65518	0.0177337	0.0698958	-3.33731
Gm14296	-1.04642	-0.109603	-1.84808	0.083939	0.172296	-4.72225
Gm14419	-0.441418	-0.927411	-1.13794	0.272586	0.383773	-5.66581
Gm14410	-0.568342	0.395777	-0.995025	0.335143	0.446996	-5.81162
Gm14412	-0.300142	-1.64936	-1.20712	0.245649	0.355405	-5.58934
Gm14418	0.23291	-1.18514	0.451064	0.658247	0.742004	-6.20127
Zfp970	-0.134291	-0.450094	-0.270516	0.790365	0.845227	-6.26777
Gm14403	-0.56843	-0.568726	-1.04648	0.311529	0.423361	-5.76106
Gm14325	1.06689	2.13318	2.67385	0.0170787	0.0684248	-3.30278
Gm14327	-0.548686	-1.45817	-1.68328	0.112532	0.207753	-4.96974
Zfp972	-0.556592	-0.0442514	-0.750832	0.464103	0.570543	-6.02033
Gm14326	-0.613858	1.42878	-0.844022	0.411611	0.52064	-5.94692
Zfp971	-1.08358	1.14733	-1.82868	0.0869327	0.175703	-4.75215
Zfp931	-0.734777	0.722098	-1.2595	0.226653	0.335157	-5.52897
Ppp1r3d	-0.0231074	-0.934034	-0.049219	0.961379	0.974379	-6.30412
Fam217b	-1.35553	-0.837525	-4.5242	0.000381132	0.0130258	0.273934
Taf4	-2.51747	3.62709	-3.25198	0.00522481	0.0369055	-2.20249
4921531C22Rik	-1.14766	1.14978	-1.94657	0.0701139	0.153775	-4.56747
Lsm14b	-1.79533	2.97557	-2.32125	0.0344034	0.100769	-3.939
Psma7	-0.076957	9.02008	-0.37643	0.711747	0.785642	-6.23272
Ss18l1	-0.676414	0.329767	-1.35024	0.196502	0.303044	-5.41957
Mtg2	0.481864	3.45905	1.60382	0.129115	0.227575	-5.0835
Osbpl2	-0.236487	3.34638	-0.901919	0.381026	0.49138	-5.8974
Adrm1	0.142811	6.46124	0.910278	0.37674	0.487444	-5.89
Lama5	-1.29453	-0.12319	-2.4068	0.0290932	0.0913345	-3.78803
Rps21	-0.325764	10.875	-0.989447	0.337777	0.449456	-5.81697
Cables2	-1.70966	2.40033	-2.49394	0.0244868	0.0830099	-3.63188
B230312C02Rik	-0.908038	-0.783334	-1.85598	0.0827456	0.170685	-4.71
Slco4a1	1.30821	-0.690451	1.64421	0.12044	0.217108	-5.02614
Mrgbp	-1.80361	4.15675	-1.81111	0.0897239	0.179654	-4.77905
Ogfr	-0.205441	4.97403	-0.828632	0.420004	0.528831	-5.95959
Col9a3	-0.743203	-1.30854	-2.60768	0.0195111	0.0733759	-3.42479
Dido1	-0.655304	6.07913	-3.03144	0.00823676	0.046737	-2.62802
Gid8	-1.0267	7.67488	-3.40828	0.00377947	0.031856	-1.89827
Slc17a9	-2.22026	0.440926	-5.3461	7.52965e-05	0.00843653	1.8092
Ythdf1	-0.247172	5.54341	-1.78297	0.094362	0.185561	-4.8218
Arfgap1	0.383606	4.26929	1.495	0.155175	0.257543	-5.23295
9230112E08Rik	-0.382644	-0.657467	-0.833779	0.417184	0.526265	-5.95538
Col20a1	-0.843831	-0.302709	-1.74264	0.101377	0.193989	-4.88232
Ppdpf	-0.785127	5.18093	-2.89875	0.0108136	0.0534622	-2.88105
Helz2	-2.20491	2.74474	-3.09402	0.00724076	0.0438639	-2.50782
Gmeb2	0.0548345	5.2052	0.212057	0.834851	0.881479	-6.28224
Rtel1	-0.0782657	4.08564	-0.367088	0.718562	0.791091	-6.23627
[truncated: 12,822 more rows]
