# Supplementary material for: Spatially resolved, multimodal in vivo Perturb-seq using antibody-based cell hashing
Source: bioRxiv preprint, doi:10.64898/2026.05.25.727765, version 1 (2026-05-26)
Supplement: Extended Data Table 8 [file 727765_file03.xlsx]

## Sheet: MouSSE_signatures
source	target	weight
IL1β	Cxcl3	5.57376
IL1β	Thbs1	4.5467
IL1β	Gm5483	4.48216
IL1β	Hsd11b2	4.46624
IL1β	Vdr	4.4544
IL1β	Retnlg	4.43758
IL1β	Plet1	4.4257
IL1β	Ch25h	4.4143
IL1β	Cxcl2	4.39653
IL1β	Sphk1	4.30792
IL1β	A530021J07Rik	-4.21877
IL1β	Ccl24	4.20003
IL1β	Lcn2	4.11305
IL1β	Dmkn	3.94586
IL1β	Gzmc	3.87556
IL1β	Cd177	3.86466
IL1β	Pla1a	3.85013
IL1β	Mmp8	3.84274
IL1β	Timp1	3.8298
IL1β	Gm30948	-3.7941
IL1β	S100a9	3.79294
IL1β	AA467197	3.76331
IL1β	Wfdc21	3.76064
IL1β	Trem1	3.66638
IL1β	Cables1	3.61799
IL1β	Ccl17	3.60611
IL1β	Rab44	3.59077
IL1β	Cd14	3.58317
IL1β	S100a8	3.57107
IL1β	Ccl6	3.56482
IL1β	Cxcl1	3.55765
IL1β	Stfa2l1	3.45826
IL1β	AC110211.1	3.37598
IL1β	Il6	3.36511
IL1β	Lrg1	3.32379
IL1β	Cd80	3.32207
IL1β	C5ar1	3.31046
IL1β	Ocstamp	3.30794
IL1β	Il1r2	3.27929
IL1β	Ccr1	3.18913
IL1β	Saa3	3.17562
IL1β	Wfdc17	3.15171
IL1β	Enah	3.10895
IL1β	Slfn4	3.06543
IL1β	D930028M14Rik	-3.06466
IL1β	Tarm1	3.03983
IL1β	Htr7	3.02871
IL1β	Ier3	2.95316
IL1β	Npnt	2.95124
IL1β	Siglece	2.9506
IL1β	Steap4	2.91997
IL1β	Cxcr2	2.91959
IL1β	Ccl9	2.91585
IL1β	Ifitm6	2.87436
IL1β	Nr4a3	2.85341
IL1β	Clec4d	2.84779
IL1β	Ifitm1	2.78802
IL1β	Mmp19	2.78749
IL1β	Tcaf2	2.78248
IL1β	Mrc1	2.77725
IL2	Fn1	3.19748
IL2	Gzmb	3.02674
IL2	Lif	2.93358
IL2	F13a1	2.87197
IL2	AI839979	2.7922
IL2	Mgst1	2.64429
IL2	Mfsd2a	2.55677
IL2	Klra2	2.54961
IL2	Chil3	2.5135
IL2	Ighg2b	2.51037
IL2	Trem2	2.46103
IL2	Cxcl9	2.44733
IL2	Slc6a19	-2.44578
IL2	Ifng	2.44159
IL2	Cxcl10	2.40936
IL2	Batf2	2.40532
IL2	Gm9733	2.39811
IL2	Ifitm6	2.35905
IL2	Cd209e	2.34484
IL2	Hacd4	2.33478
IL2	Gpr33	2.31811
IL2	Cd177	2.30737
IL2	Plcb1	2.28254
IL2	Adora2b	2.26982
IL2	Tnip3	2.26865
IL2	Tarm1	2.24495
IL2	Hrh1	2.21827
IL2	Bspry	2.19682
IL2	Hp	2.18746
IL2	Ngfr	2.1643
IL2	F10	2.15178
IL2	Vcan	2.15013
IL2	Mmp8	2.10329
IL2	Cdh1	2.08563
IL2	Htr7	2.08551
IL2	Gprc5c	2.08066
IL2	Lta	2.06087
IL2	Dram1	2.05797
IL2	Ifi207	2.05239
IL2	Serpina3g	2.02636
IL2	Serpina3f	2.02053
IL2	Fcgr4	2.01784
IL2	Ccl6	2.01331
IL2	Hbegf	2.00509
IL2	F2rl2	1.99428
IL2	Vpreb3	-1.96472
IL2	Nfe2	1.95509
IL2	Emilin2	1.95183
IL2	F830016B08Rik	1.93699
IL2	Ubd	1.93329
IL2	Gda	1.91574
IL2	Nlrp3	1.90895
IL2	Gpr141	1.90593
IL2	Lrp1	1.90485
IL2	Ifit3b	-1.89442
IL2	Tbxas1	1.88966
IL2	Cyp7b1	1.88638
IL2	Asns	1.87723
IL2	Ms4a8a	1.8765
IL2	Serpinb8	1.87449
FLT3L	Ifit3b	-3.2634
FLT3L	Cxcl10	-3.07033
FLT3L	Ifit3	-2.97864
FLT3L	Rsad2	-2.82565
FLT3L	Isg15	-2.72615
FLT3L	Ifi204	-2.33894
FLT3L	Ifit1	-2.20539
FLT3L	Cmpk2	-2.10734
FLT3L	Oasl2	-1.84315
FLT3L	Cxcl9	-1.71476
FLT3L	Ifi44	-1.67908
FLT3L	Trim30c	-1.58618
FLT3L	Iigp1	-1.56538
FLT3L	Isg20	-1.55671
FLT3L	Xdh	-1.49574
FLT3L	Oasl1	-1.49482
FLT3L	Oas2	-1.41495
FLT3L	Ifitm3	-1.39941
FLT3L	Wfdc17	-1.36408
FLT3L	Irf7	-1.34692
FLT3L	Usp18	-1.32665
FLT3L	Cd207	1.26761
FLT3L	Ms4a6d	-1.26755
FLT3L	Dhx58	-1.26439
FLT3L	Rtp4	-1.20541
FLT3L	Gbp6	-1.19144
FLT3L	Oas3	-1.17714
FLT3L	Zbp1	-1.16766
FLT3L	Oas1a	-1.15492
FLT3L	Fzd1	1.15381
FLT3L	Gbp5	-1.05882
FLT3L	Gbp2	-1.03692
FLT3L	Phf11a	-1.01282
FLT3L	Phf11b	-1.00791
FLT3L	AW011738	-1.00023
FLT3L	Parp12	-0.98746
FLT3L	AY036118	-0.985727
FLT3L	Slfn5	-0.980246
FLT3L	Ifi207	-0.948713
FLT3L	Tgtp2	-0.946287
FLT3L	Xaf1	-0.94313
FLT3L	Rnf213	-0.940983
FLT3L	Serpina3g	-0.928088
FLT3L	Mx1	-0.908856
FLT3L	Ddx60	-0.902946
FLT3L	S100a8	-0.877717
FLT3L	Ifih1	-0.851265
FLT3L	Ms4a4c	-0.847581
FLT3L	Saa3	-0.845644
FLT3L	Lpcat4	0.839757
FLT3L	Tgtp1	-0.823483
FLT3L	Eif2ak2	-0.810276
FLT3L	Ms4a1	-0.776081
FLT3L	F630028O10Rik	0.774326
FLT3L	Trim30d	-0.774156
FLT3L	Igtp	-0.771808
FLT3L	Pml	-0.758224
FLT3L	Parp9	-0.75109
FLT3L	S100a9	-0.745893
FLT3L	Parp14	-0.740375
TNFα	Saa3	4.96544
TNFα	Gpr84	4.63118
TNFα	Lcn2	3.69084
TNFα	Wfdc21	3.47323
TNFα	Clec4e	3.44658
TNFα	Cxcl2	3.41636
TNFα	Cd14	3.15812
TNFα	Fpr2	3.14931
TNFα	Il1rn	2.89213
TNFα	Acod1	2.87995
TNFα	Hpgd	-2.81937
TNFα	AA467197	2.81106
TNFα	Trem3	2.61396
TNFα	Gm26802	-2.48899
TNFα	C5ar1	2.47169
TNFα	Trem1	2.42183
TNFα	Gpr85	2.39273
TNFα	Clec4d	2.32718
TNFα	Hspa1a	-2.29474
TNFα	Hspa1b	-2.27365
TNFα	Cxcl13	2.23055
TNFα	Trnp1	2.1975
TNFα	Cd70	2.18314
TNFα	A530021J07Rik	-2.15942
TNFα	Pla1a	2.13387
TNFα	Jdp2	2.04824
TNFα	Cxcl1	2.0472
TNFα	1600010M07Rik	-2.03446
TNFα	Il1a	2.00141
TNFα	Cyp7b1	1.99116
TNFα	Ccl9	1.96873
TNFα	Sh2d1b1	-1.95807
TNFα	Ccl17	1.95795
TNFα	Dgat2	1.95523
TNFα	Tnfrsf8	1.93002
TNFα	Tmem37	-1.91827
TNFα	Htr7	1.89417
TNFα	S100a9	1.87725
TNFα	Sirpb1c	-1.87412
TNFα	Cdk5r1	1.86495
TNFα	Mmp14	1.86405
TNFα	Sept3	-1.83483
TNFα	Cables1	1.82908
TNFα	Ccrl2	1.818
TNFα	Slc7a11	1.81656
TNFα	2310040G24Rik	-1.81471
TNFα	Spata31d1b	1.81439
TNFα	S100a8	1.76035
TNFα	Trim30c	-1.75601
TNFα	Gm14085	-1.73734
TNFα	Upp1	1.72368
TNFα	Ccl22	1.72103
TNFα	Slc27a3	1.71727
TNFα	Birc5	1.70639
TNFα	Atf3	-1.68235
TNFα	Marcksl1	1.66499
TNFα	Clec5a	1.66318
TNFα	Klf4	-1.64896
TNFα	Il1b	1.62624
TNFα	Il1r2	1.58837
PBS	Chil3	-2.57515
PBS	Ccl12	-2.22677
PBS	Cxcl10	-1.6594
PBS	Gzmb	-1.55853
PBS	Iigp1	-1.37556
PBS	Isg15	-1.36421
PBS	Ifi204	-1.3408
PBS	Isg20	-1.32289
PBS	Gm4951	-1.32087
PBS	F13a1	-1.30536
PBS	AA467197	-1.2921
PBS	Cxcl9	-1.28082
PBS	Gm26532	1.27601
PBS	Ifit3b	-1.26278
PBS	Fcgr1	-1.26135
PBS	Gm17056	1.25921
PBS	Fn1	-1.25065
PBS	Rsad2	-1.24756
PBS	Hspa1a	1.2241
PBS	Ifitm6	-1.19747
PBS	Ccr1	-1.1893
PBS	Oasl2	-1.16264
PBS	Serpina3f	-1.15768
PBS	Ccl17	-1.15192
PBS	Ifit3	-1.13947
PBS	Msr1	-1.13842
PBS	Ifit1	-1.1279
PBS	Nr4a2	1.11349
PBS	Oasl1	-1.08233
PBS	Fos	1.07999
PBS	Ifi44	-1.07112
PBS	Clec4n	-1.06071
PBS	Hp	-1.0592
PBS	Hspa1b	1.04263
PBS	Ms4a6d	-0.981846
PBS	Gbp2	-0.973885
PBS	Oas1a	-0.943997
PBS	Oas2	-0.942623
PBS	Dusp1	0.922166
PBS	Fosb	0.921884
PBS	Trim30c	-0.918908
PBS	Il1rn	-0.917359
PBS	Zbp1	-0.916737
PBS	Cmpk2	-0.898207
PBS	Oas3	-0.892641
PBS	Irf7	-0.892586
PBS	Rhob	0.883574
PBS	B430306N03Rik	-0.88239
PBS	Nr4a1	0.869411
PBS	Rgs16	0.868602
PBS	Gm26802	0.860507
PBS	Dram1	-0.853479
PBS	Phf11d	-0.846402
PBS	Ifitm3	-0.842394
PBS	Ly6a	-0.841906
PBS	Cd300lf	-0.8377
PBS	Atf3	0.829347
PBS	Gda	-0.822564
PBS	Dhx58	-0.794478
PBS	Ifi207	-0.79191
IL22	Cxcl10	-2.56268
IL22	Gzmb	-2.47725
IL22	Fn1	-1.96872
IL22	Ifng	-1.72843
IL22	Serpina3f	-1.7084
IL22	Cxcl9	-1.53736
IL22	Rsad2	-1.51241
IL22	Iigp1	-1.50319
IL22	Ifi204	-1.46486
IL22	Ifit3b	-1.39718
IL22	Ifit3	-1.37622
IL22	Isg15	-1.32472
IL22	Socs3	-1.26585
IL22	Gbp2	-1.15982
IL22	Isg20	-1.13425
IL22	Gbp6	-1.11098
IL22	Gadd45g	-1.09307
IL22	Ifit1	-1.06176
IL22	Ccl2	-1.0265
IL22	Cmpk2	-1.02601
IL22	Gzma	-1.02206
IL22	Oas1a	-1.01974
IL22	Ms4a6d	-0.985081
IL22	Fabp1	0.971978
IL22	Tgtp1	-0.963771
IL22	Fam83f	0.931513
IL22	Serpina3g	-0.930117
IL22	Ppa1	-0.919566
IL22	Pgam2	0.890332
IL22	Cd300c	0.8864
IL22	Hbb-bs	-0.8722
IL22	Igtp	-0.86975
IL22	Cd274	-0.869055
IL22	Oasl2	-0.847482
IL22	Gm12185	-0.843298
IL22	Smim5	0.830513
IL22	Socs1	-0.823413
IL22	Gbp5	-0.822471
IL22	Tgtp2	-0.814699
IL22	Irgm2	-0.811016
IL22	Ifit2	-0.807863
IL22	Irgm1	-0.800849
IL22	Oas2	-0.797817
IL22	Scd1	-0.786685
IL22	Obscn	0.765847
IL22	Zbp1	-0.764695
IL22	Oasl1	-0.75512
IL22	Oas3	-0.75351
IL22	Cd79a	-0.73839
IL22	Ms4a1	-0.733927
IL22	Gbp7	-0.728932
IL22	Gm31243	-0.728627
IL22	Klk1	0.714898
IL22	Pax5	-0.701458
IL22	Atp2a1	0.701108
IL22	Klk1b27	0.699925
IL22	Bank1	-0.697814
IL22	Slfn5	-0.677033
IL22	Dntt	0.670031
IL22	Ccdc162	0.669126
IL21	Glycam1	2.30036
IL21	Cd5l	1.49214
IL21	Hspa1a	-1.45494
IL21	Gbp6	-1.39225
IL21	Hspa1b	-1.3547
IL21	Pald1	1.12426
IL21	Ifit3	-1.06429
IL21	Iigp1	-1.05829
IL21	Folr2	1.05353
IL21	Oasl2	-0.936561
IL21	Marco	0.932468
IL21	Kcnj8	0.854521
IL21	Hbb-bs	0.797722
IL21	Igfbp4	0.78728
IL21	Cd209b	0.744981
IL21	Ccl12	0.73182
IL21	Dhrs13	0.706802
IL21	Pianp	0.688245
IL21	Tmem37	0.685113
IL21	Ifit1	-0.683222
IL21	S1pr5	0.645446
IL21	Cd244	0.618487
IL21	Cd274	-0.61202
IL21	Tbx21	0.611938
IL21	Igtp	-0.600692
IL21	Klra7	0.600183
IL21	Cars	0.596203
IL21	B230217C12Rik	0.594601
IL21	Irgm1	-0.591983
IL21	Gatc	0.585842
IL21	Myo6	0.583073
IL21	Tubb4b	0.570346
IL21	Espl1	0.558289
IL21	Socs3	0.557573
IL21	Pcgf6	0.5494
IL21	Klra1	0.542424
IL21	Celf4	0.539495
IL21	Stat1	-0.53584
IL21	Plxdc1	0.535132
IL21	Mcemp1	0.51859
IL21	Uba52	-0.512656
IL21	Bysl	0.511934
IL21	Gbp4	-0.510809
IL21	Nkg7	0.506397
IL21	Mid1	0.496298
IL21	Gbp7	-0.494067
IL21	Foxred2	0.490079
IL21	Rrp12	0.474348
IL21	Lyz1	0.471778
IL21	Parp14	-0.471057
IL21	Klra6	0.469615
IL21	Ifngas1	0.467955
IL21	Gm8369	-0.466945
IL21	Pdcd4	-0.465479
IL21	Mgst2	-0.463488
IL21	Dusp3	0.456761
IL21	Gngt2	0.454238
IL21	Ifi213	-0.452727
IL21	Trat1	-0.450318
IL21	Ifi208	-0.449694
IL11	Glycam1	2.84178
IL11	Ifit3b	-2.18927
IL11	Ifit3	-1.98066
IL11	Isg15	-1.75213
IL11	Rsad2	-1.73381
IL11	Ifit1	-1.72342
IL11	Gbp6	-1.61921
IL11	Il33	1.58309
IL11	Cacnb4	1.53228
IL11	Ecscr	1.5118
IL11	Arhgap8	1.49611
IL11	Iigp1	-1.49145
IL11	Slc40a1	1.46963
IL11	Tgtp1	-1.40586
IL11	9530059O14Rik	1.39538
IL11	Soat2	1.3233
IL11	Pald1	1.28233
IL11	Isg20	-1.25819
IL11	Stab2	1.25625
IL11	Gm26778	1.25465
IL11	Trp53cor1	1.24453
IL11	Snta1	1.24164
IL11	Rnf152	1.24103
IL11	Marco	1.21129
IL11	Asprv1	1.20445
IL11	Mertk	1.20375
IL11	Gm12972	1.19849
IL11	Ms4a8a	1.19317
IL11	Lrg1	1.18467
IL11	Oasl1	-1.1738
IL11	Slc1a3	1.17003
IL11	Tmem132a	1.16428
IL11	Ank2	1.15622
IL11	Oasl2	-1.15455
IL11	Npl	1.15192
IL11	Ly6c1	-1.15146
IL11	Gm26632	1.15132
IL11	Ifit2	-1.14624
IL11	Optn	1.14456
IL11	Rbp1	1.13985
IL11	Skint3	1.13272
IL11	Fam20c	1.12769
IL11	4930455G09Rik	1.12314
IL11	Emp2	1.12007
IL11	Itga9	1.11414
IL11	Sash1	1.11196
IL11	Tnni3	1.1029
IL11	Ptgs1	1.10055
IL11	Fxyd6	1.10024
IL11	Clec1a	1.09811
IL11	Cpt1c	1.09699
IL11	Fmn1	1.09665
IL11	Gas6	1.0801
IL11	Hpgd	1.07616
IL11	Trpm2	1.07522
IL11	Folr2	1.05816
IL11	Igtp	-1.05705
IL11	Rxrg	1.05128
IL11	Parvb	1.02548
IL11	C1qa	1.01905
TPO	Msr1	-2.61953
TPO	Gzmb	-1.71907
TPO	Ifit3b	-1.62106
TPO	Il1b	-1.58533
TPO	Rsad2	-1.52803
TPO	Lilr4b	-1.52329
TPO	Ifi204	-1.49445
TPO	Ms4a6d	-1.3055
TPO	Ly6k	-1.26409
TPO	Ifitm3	-1.23986
TPO	Gm26532	-1.21866
TPO	S100a9	-1.21552
TPO	Isg15	-1.189
TPO	Oasl2	-1.18586
TPO	Cd300lf	-1.17224
TPO	Iigp1	-1.15257
TPO	Wfdc17	-1.15049
TPO	Ifit3	-1.09911
TPO	Ifi211	-1.09859
TPO	Oas1a	-1.05002
TPO	Gm21887	1.02578
TPO	Cebpb	-0.961699
TPO	Cmpk2	-0.900261
TPO	Isg20	-0.887135
TPO	Gbp2	-0.866779
TPO	Gm14005	-0.857639
TPO	Serpina3g	-0.834241
TPO	Ly6a	-0.816013
TPO	Fos	-0.809958
TPO	Oasl1	-0.808738
TPO	Dusp1	-0.761549
TPO	Gbp5	-0.739523
TPO	Bcl3	-0.710354
TPO	Gm42047	-0.705825
TPO	Socs3	-0.70571
TPO	Ms4a6c	-0.695305
TPO	Gadd45g	-0.693389
TPO	Cd274	-0.681494
TPO	Irgm1	-0.676404
TPO	Irf7	-0.659887
TPO	Fosl2	-0.627865
TPO	Bst2	-0.625536
TPO	Bhlhe40	-0.62303
TPO	Plac8	-0.602417
TPO	Plek	-0.593138
TPO	Sdc4	-0.590233
TPO	Ly86	-0.589327
TPO	Ppa1	-0.588768
TPO	Nampt	-0.574712
TPO	Hist1h2ap	-0.562201
TPO	Zbp1	-0.56116
TPO	Gstp1	-0.55367
TPO	Trib1	-0.537828
TPO	Kmo	-0.537031
TPO	Lyn	-0.501799
TPO	Nme2	-0.499221
TPO	Stat2	-0.495231
TPO	Socs1	-0.495035
TPO	Pim1	-0.491193
TPO	Igtp	-0.48777
IL31	Cxcl10	-2.08408
IL31	Cd209f	1.90809
IL31	Iglc1	-1.8005
IL31	Oas2	-1.7168
IL31	Gm31243	-1.65121
IL31	Hmox1	1.64469
IL31	Ifi44	-1.629
IL31	Isg15	-1.60999
IL31	Iigp1	-1.5989
IL31	Ifit3	-1.51027
IL31	Cd5l	1.41637
IL31	Isg20	-1.40913
IL31	Ms4a1	-1.40564
IL31	Oasl2	-1.37391
IL31	Ifit3b	-1.28974
IL31	Bank1	-1.27973
IL31	Ifit1	-1.25782
IL31	Vpreb3	-1.22328
IL31	Ebf1	-1.22132
IL31	Marco	1.21764
IL31	Cd79a	-1.21373
IL31	Rsad2	-1.18887
IL31	Oasl1	-1.16762
IL31	Cr2	-1.15817
IL31	Bpifb3	1.14665
IL31	Iglc2	-1.13932
IL31	Gbp6	-1.13816
IL31	Ifit2	-1.13357
IL31	Folr2	1.11772
IL31	Cmpk2	-1.11094
IL31	Gbp2	-1.04092
IL31	Ighd	-1.01585
IL31	Scd1	-0.992457
IL31	Hepacam2	0.988903
IL31	Tnfrsf13c	-0.958213
IL31	Oas3	-0.951538
IL31	Ly6a	-0.917582
IL31	Zbp1	-0.890864
IL31	Fblim1	0.887931
IL31	Fcmr	-0.879183
IL31	Slc1a3	0.878369
IL31	Clec4b1	0.862713
IL31	Rab7b	0.84815
IL31	Map3k20	0.841412
IL31	Irf7	-0.833192
IL31	C1qb	0.830795
IL31	Slfn5	-0.820331
IL31	Igf1	0.814502
IL31	Rtp4	-0.811848
IL31	Aph1b	0.80307
IL31	Socs3	-0.796693
IL31	Cd19	-0.796014
IL31	Hbb-bs	-0.794763
IL31	Trf	0.794756
IL31	Fcer2a	-0.781158
IL31	C1qa	0.779909
IL31	Gbp5	-0.770103
IL31	Tgtp2	-0.767163
IL31	Sept3	0.763039
IL31	Nr1h3	0.76206
Noggin	Ccl2	-2.56522
Noggin	Cxcl10	-2.51002
Noggin	Il1rn	-2.40548
Noggin	Fn1	-2.1613
Noggin	AA467197	-2.11511
Noggin	Ifitm6	-2.07158
Noggin	Ifi204	-2.02185
Noggin	Hp	-1.91438
Noggin	Ifng	-1.77797
Noggin	Serpina3f	-1.75215
Noggin	Iigp1	-1.69117
Noggin	Rsad2	-1.4988
Noggin	Isg15	-1.40879
Noggin	Ifitm3	-1.38799
Noggin	Gzmb	-1.38379
Noggin	Oas1a	-1.31705
Noggin	Oas2	-1.27645
Noggin	Isg20	-1.2414
Noggin	Gadd45g	-1.22789
Noggin	Ifi211	-1.2225
Noggin	Ccl6	-1.21902
Noggin	Cebpb	-1.2029
Noggin	Socs3	-1.19324
Noggin	Gbp6	-1.18386
Noggin	Ifi207	-1.16998
Noggin	Gbp2	-1.16526
Noggin	Ifit3	-1.16126
Noggin	Slc7a5	-1.16077
Noggin	Lilr4b	-1.14989
Noggin	Atf3	-1.13712
Noggin	Oasl2	-1.09916
Noggin	Ifit3b	-1.08757
Noggin	Dram1	-1.08171
Noggin	Gm30948	1.08039
Noggin	Ms4a6d	-1.06816
Noggin	Serpina3g	-1.01946
Noggin	Fos	-0.990489
Noggin	Irgm1	-0.98889
Noggin	Bcl3	-0.975839
Noggin	Dusp1	-0.95901
Noggin	Casp4	-0.941193
Noggin	Ccrl2	-0.935727
Noggin	Prdm1	-0.933537
Noggin	Bhlhe40	-0.931612
Noggin	Nr4a3	-0.93031
Noggin	Cd274	-0.923145
Noggin	Gbp5	-0.922553
Noggin	Nr4a2	-0.896817
Noggin	Wfdc17	-0.895771
Noggin	Fosb	-0.881084
Noggin	Gm47283	-0.87234
Noggin	Ifitm2	-0.868079
Noggin	Nupr1	-0.845423
Noggin	Gem	-0.843523
Noggin	Socs1	-0.822467
Noggin	Ifit1	-0.819561
Noggin	Zbp1	-0.817509
Noggin	Fosl2	-0.814529
Noggin	Oas3	-0.789712
Noggin	Ccl9	-0.782566
PSPN (Persephin)	Cxcl10	-2.45674
PSPN (Persephin)	Fn1	-1.86286
PSPN (Persephin)	Gzmb	-1.79421
PSPN (Persephin)	Ighg2c	-1.76991
PSPN (Persephin)	Ifi204	-1.50877
PSPN (Persephin)	Lilr4b	-1.46672
PSPN (Persephin)	Xlr3b	1.21935
PSPN (Persephin)	Iigp1	-1.13622
PSPN (Persephin)	Socs3	-1.11067
PSPN (Persephin)	Gbp2	-1.02184
PSPN (Persephin)	S100a8	-0.969245
PSPN (Persephin)	Gadd45g	-0.952499
PSPN (Persephin)	Cebpb	-0.822982
PSPN (Persephin)	Cish	-0.806527
PSPN (Persephin)	Isg15	-0.750669
PSPN (Persephin)	Cdk5rap1	0.742765
PSPN (Persephin)	Socs1	-0.722405
PSPN (Persephin)	Gbp5	-0.696842
PSPN (Persephin)	Cd274	-0.691748
PSPN (Persephin)	Gstp1	-0.690754
PSPN (Persephin)	Hyou1	-0.662075
PSPN (Persephin)	Hspa1a	0.661122
PSPN (Persephin)	Ppa1	-0.652975
PSPN (Persephin)	Cars	-0.622091
PSPN (Persephin)	Hspa1b	0.617449
PSPN (Persephin)	Igtp	-0.610815
PSPN (Persephin)	Gbp7	-0.597753
PSPN (Persephin)	Bcl3	-0.569074
PSPN (Persephin)	Pim1	-0.554419
PSPN (Persephin)	Irgm1	-0.527515
PSPN (Persephin)	Nampt	-0.527153
PSPN (Persephin)	Gbp4	-0.51959
PSPN (Persephin)	Slc7a1	-0.501662
PSPN (Persephin)	Igfbp4	-0.468546
PSPN (Persephin)	Zbp1	-0.465474
PSPN (Persephin)	Ly6a	-0.457398
PSPN (Persephin)	Junb	-0.416837
PSPN (Persephin)	Ppp1r16b	-0.415599
PSPN (Persephin)	Dtx3l	-0.41438
PSPN (Persephin)	Polr2l	-0.397789
PSPN (Persephin)	Pdia3	-0.392617
PSPN (Persephin)	Stat1	-0.386901
PSPN (Persephin)	Lars2	0.380723
PSPN (Persephin)	Zfp36	-0.379932
PSPN (Persephin)	Zufsp	-0.375114
PSPN (Persephin)	Ppfia4	0.3668
PSPN (Persephin)	Rtp4	-0.36327
PSPN (Persephin)	Irf1	-0.354769
PSPN (Persephin)	Rpl10-ps3	0.350771
PSPN (Persephin)	Erh	-0.350644
PSPN (Persephin)	Uba52	-0.34301
PSPN (Persephin)	Gm42418	0.336153
PSPN (Persephin)	Adck5	0.336134
PSPN (Persephin)	Ifi47	-0.334614
PSPN (Persephin)	Usp25	-0.326118
PSPN (Persephin)	Hspa5	-0.323898
PSPN (Persephin)	Rsrp1	0.315171
PSPN (Persephin)	Gm10076	-0.314981
PSPN (Persephin)	Nars	-0.30666
PSPN (Persephin)	Mxd4	0.281171
SCF	Cxcl10	-4.01006
SCF	Ifitm6	-2.97377
SCF	Gzmb	-2.7338
SCF	Isg15	-2.60583
SCF	Ifi204	-2.43272
SCF	Cxcl9	-2.30155
SCF	Rsad2	-2.26099
SCF	Oasl2	-2.01968
SCF	Oas2	-1.95046
SCF	Ifitm3	-1.93125
SCF	Ncr1	-1.92603
SCF	Oasl1	-1.85643
SCF	Gzma	-1.78812
SCF	Ifit3	-1.71104
SCF	Xcl1	-1.67676
SCF	Isg20	-1.56274
SCF	Ifit1	-1.55777
SCF	Iigp1	-1.55016
SCF	Cmpk2	-1.51882
SCF	Oas3	-1.50421
SCF	Ifi207	-1.48149
SCF	Serpina3g	-1.44424
SCF	Gbp2	-1.37365
SCF	Slfn5	-1.18823
SCF	Irf7	-1.16285
SCF	Gbp5	-1.07201
SCF	Irgm2	-1.05498
SCF	Rnf213	-1.03925
SCF	Wfdc17	-0.985239
SCF	Ccr5	-0.975709
SCF	Klrb1c	-0.975557
SCF	Ppa1	-0.95098
SCF	Rtp4	-0.943241
SCF	Cd207	0.933755
SCF	Zbp1	-0.921038
SCF	Ly6c2	-0.907367
SCF	Trnp1	0.902234
SCF	Cd274	-0.895986
SCF	Socs3	-0.869457
SCF	Stat2	-0.84684
SCF	Fcer1g	-0.83695
SCF	Nampt	-0.826441
SCF	Cybb	-0.807571
SCF	Bst2	-0.797112
SCF	Gbp7	-0.791057
SCF	Plac8	-0.789243
SCF	Gbp4	-0.785849
SCF	Xaf1	-0.768988
SCF	Zbtb49	0.75743
SCF	Eif2ak2	-0.757179
SCF	Gm38405	0.719971
SCF	Cdk5rap1	0.719747
SCF	Bend5	0.710164
SCF	Ms4a4c	-0.710039
SCF	Fgr	-0.704248
SCF	Cpt1a	0.686895
SCF	Zscan2	0.685095
SCF	Zfp354c	0.674109
SCF	Fcmr	0.66671
SCF	Irgm1	-0.663968
VEGF	Cxcl10	-3.54788
VEGF	Ifi204	-2.25827
VEGF	Rsad2	-2.15364
VEGF	Isg15	-1.98444
VEGF	Ifit3	-1.96228
VEGF	Ifit3b	-1.91965
VEGF	Gzmb	-1.80552
VEGF	Oasl1	-1.71814
VEGF	Ifit1	-1.71256
VEGF	Oasl2	-1.64382
VEGF	Cmpk2	-1.63525
VEGF	Oas3	-1.59939
VEGF	Iigp1	-1.47551
VEGF	Isg20	-1.37676
VEGF	Igkc	-1.23933
VEGF	Gbp6	-1.19854
VEGF	Dhx58	-1.1945
VEGF	Ifitm3	-1.14613
VEGF	Gbp2	-1.1144
VEGF	Gadd45g	-1.1001
VEGF	Gbp5	-1.0604
VEGF	Eif2ak2	-1.0183
VEGF	Usp18	-0.988482
VEGF	Iglc2	-0.967606
VEGF	Serpina3g	-0.95005
VEGF	Ifih1	-0.945932
VEGF	Irf7	-0.931749
VEGF	Zbp1	-0.925682
VEGF	Ms4a1	-0.890151
VEGF	Rtp4	-0.886336
VEGF	AI847159	0.878519
VEGF	Cd274	-0.857345
VEGF	Rnf213	-0.82751
VEGF	Gbp7	-0.811944
VEGF	Gm11707	0.804264
VEGF	Helz2	-0.803086
VEGF	Ly6a	-0.755241
VEGF	Ebf1	-0.744371
VEGF	Ms4a4c	-0.736936
VEGF	Ppa1	-0.719509
VEGF	AY036118	-0.703978
VEGF	Plac8	-0.699953
VEGF	Trim30a	-0.689476
VEGF	Cd79a	-0.650837
VEGF	Igtp	-0.64867
VEGF	Iglc3	-0.611489
VEGF	Capn3	0.588235
VEGF	Dtx3l	-0.587751
VEGF	Gbp4	-0.58032
VEGF	Gm10076	0.559114
VEGF	Gm9844	0.535116
VEGF	Serpinb1a	-0.531246
VEGF	Bst2	-0.517755
VEGF	Stat1	-0.513051
VEGF	Samhd1	-0.499006
VEGF	Jaml	-0.487688
VEGF	A630023P12Rik	0.476544
VEGF	Ly6d	-0.472426
VEGF	Trmt10a	0.466557
VEGF	Ifi35	-0.463772
LIGHT	Chil3	-4.45492
LIGHT	Cxcl10	-3.16761
LIGHT	Ifi44	-3.06778
LIGHT	Ifit3b	-2.92476
LIGHT	Ifit3	-2.56182
LIGHT	Fn1	-2.49165
LIGHT	Isg15	-2.42127
LIGHT	Ighg2b	2.39827
LIGHT	Cxcl9	-2.33913
LIGHT	Rsad2	-2.3219
LIGHT	Ifi204	-2.31674
LIGHT	Oasl2	-2.11071
LIGHT	Hp	-2.08787
LIGHT	Ifit1	-2.0758
LIGHT	Iigp1	-1.99299
LIGHT	Gzmb	-1.91142
LIGHT	Isg20	-1.87835
LIGHT	Serpina3f	-1.78021
LIGHT	Cmpk2	-1.7556
LIGHT	Ifi211	-1.73684
LIGHT	Oasl1	-1.71071
LIGHT	Il1rn	-1.708
LIGHT	Oas2	-1.69804
LIGHT	Ifitm3	-1.66222
LIGHT	Gbp6	-1.63834
LIGHT	Ighg1	-1.53252
LIGHT	Irf7	-1.48337
LIGHT	Oas3	-1.4476
LIGHT	Ighg2c	1.43363
LIGHT	Tgtp1	-1.38531
LIGHT	Dhx58	-1.38351
LIGHT	Trim30c	-1.37884
LIGHT	Phf11d	-1.36812
LIGHT	Rtp4	-1.36635
LIGHT	Ms4a6d	-1.33683
LIGHT	Serpina3g	-1.33332
LIGHT	Ifi207	-1.24914
LIGHT	Xdh	-1.19884
LIGHT	Ifih1	-1.18773
LIGHT	Fcgr3	-1.13856
LIGHT	Usp18	-1.13197
LIGHT	Slfn5	-1.129
LIGHT	Gbp2	-1.12557
LIGHT	Oas1a	-1.10686
LIGHT	Zbp1	-1.08752
LIGHT	Xaf1	-1.08586
LIGHT	Ifitm2	-1.05926
LIGHT	Rnf213	-1.05264
LIGHT	Iglc2	1.04676
LIGHT	Bcl3	-1.02534
LIGHT	Ifit2	-1.02009
LIGHT	Igtp	-0.997665
LIGHT	Gm30948	0.986461
LIGHT	Gbp7	-0.940449
LIGHT	Phf11c	-0.931355
LIGHT	Cebpb	-0.928205
LIGHT	Irgm1	-0.925309
LIGHT	Ppa1	-0.922985
LIGHT	H2-T24	-0.915145
LIGHT	Gda	-0.880704
MCSF	Arg1	3.55781
MCSF	Lpl	2.29877
MCSF	Fn1	1.8604
MCSF	F13a1	1.82231
MCSF	Msr1	1.81425
MCSF	Slc15a2	-1.63634
MCSF	C5ar1	1.60398
MCSF	Trem3	1.54812
MCSF	Ccl12	1.49709
MCSF	Nr1h3	1.439
MCSF	Vcan	1.43691
MCSF	Serpinb8	1.36741
MCSF	Gm5150	1.34398
MCSF	Isg15	-1.3187
MCSF	Pilra	1.3184
MCSF	Lilra6	1.2937
MCSF	Dmwd	1.28546
MCSF	Fam20c	1.26392
MCSF	Emilin2	1.24997
MCSF	Slc11a1	1.24994
MCSF	Cd300lb	1.22004
MCSF	Alox5	1.17797
MCSF	Ifit3	-1.17754
MCSF	Isg20	-1.17647
MCSF	Tubb6	1.17144
MCSF	Clec4d	1.15255
MCSF	Ccl9	1.13685
MCSF	Ifit3b	-1.13645
MCSF	Ccl6	1.09639
MCSF	Hmox1	1.08584
MCSF	Ifit1	-1.05939
MCSF	Vat1	1.04395
MCSF	Cd300ld	1.04132
MCSF	Pilrb1	1.03601
MCSF	Itgam	1.01859
MCSF	Ankrd6	1.00521
MCSF	Clec5a	1.00461
MCSF	Mid1	-0.982725
MCSF	Parvb	0.976514
MCSF	Ifitm6	0.973765
MCSF	Iigp1	-0.961626
MCSF	F10	0.942115
MCSF	Hp	0.938346
MCSF	Gda	0.93362
MCSF	Klra2	0.927888
MCSF	Clec4a2	0.925735
MCSF	Adam15	0.921717
MCSF	Igkc	-0.907745
MCSF	AI839979	0.878115
MCSF	Lgals3	0.863663
MCSF	6430548M08Rik	0.863332
MCSF	Lrp1	0.860022
MCSF	Klrg1	0.857794
MCSF	Chil3	0.848639
MCSF	Ptgir	0.847206
MCSF	Clec4e	0.839979
MCSF	Zbp1	-0.799666
MCSF	Pilrb2	0.796191
MCSF	Cd177	0.795826
MCSF	Gm47283	-0.781463
IL5	Cxcl10	-1.20319
IL5	Hspa1b	-1.13567
IL5	Hspa1a	-1.06966
IL5	Fcmr	-0.857928
IL5	Mtus2	0.83167
IL5	Cmtm3	0.770557
IL5	Cebpa	0.747263
IL5	Cd200r1	0.728451
IL5	Gbp2	-0.717708
IL5	Iigp1	-0.696608
IL5	Iglc2	-0.638093
IL5	Cd79a	-0.591755
IL5	Ly6a	-0.578449
IL5	Iglc3	-0.544182
IL5	Ighd	-0.508211
IL5	Igtp	-0.504161
IL5	Ebf1	-0.498934
IL5	Plbd1	0.487728
IL5	Socs1	-0.472845
IL5	Zbp1	-0.456483
IL5	Gbp7	-0.437524
IL5	Gbp4	-0.427488
IL5	Utp23	0.373691
IL5	Ifi47	-0.352618
IL5	Efhd2	0.350965
IL5	Tuba1c	0.324477
IL5	Gm42418	0.300076
IL5	Hist1h1e	0.292403
IL5	Psap	0.290291
IL5	Sdhd	0.272989
IL5	Ahnak	0.258818
IL5	Cap1	0.25825
IL5	Gltp	0.251686
IL5	Lars2	0.251045
IL5	Vim	0.245169
IL5	2310011J03Rik	0.235845
IL5	Cotl1	0.212382
IL5	Plac8	-0.211483
IL5	Arpc4	0.207183
IL5	S100a11	0.195137
IL5	Actb	0.195054
IL5	Actg1	0.191
IL5	Arhgap15	-0.189907
IL5	Anxa2	0.184832
IL5	Arpp19	-0.176663
IL5	Dnaja1	-0.17423
IL5	Ltb	-0.167314
IL5	Cfl1	0.159648
IL5	Laptm5	0.145008
IL5	Dynll1	-0.136708
IL5	Rpl27	0.128482
IL5	mt-Nd3	-0.118268
IL5	Pfn1	0.115976
IL5	Arpc2	0.110508
IL5	Rps29	-0.110481
IL5	Malat1	-0.1096
IL5	Calm1	0.105895
IL5	Rpl10	0.105489
IL5	Tmsb4x	0.100219
Leptin	Cxcl10	-1.8871
Leptin	Isg15	-1.71547
Leptin	Ccl17	-1.71159
Leptin	Ighg1	-1.48434
Leptin	Cxcl9	-1.45213
Leptin	Rsad2	-1.39961
Leptin	Gzmb	-1.39392
Leptin	Ifit3b	-1.24038
Leptin	Ifit3	-1.22615
Leptin	Oasl2	-1.11137
Leptin	Gadd45g	-1.05926
Leptin	Iigp1	-1.01603
Leptin	Ifit1	-0.988545
Leptin	Oasl1	-0.985199
Leptin	Gbp2	-0.92821
Leptin	Wfdc17	-0.826856
Leptin	Gzma	-0.824136
Leptin	Gm47283	0.796133
Leptin	Gbp5	-0.755621
Leptin	Serpina3g	-0.723734
Leptin	Ly6a	-0.682438
Leptin	Fabp5	-0.65888
Leptin	Socs1	-0.627162
Leptin	Gbp7	-0.595081
Leptin	Igtp	-0.56048
Leptin	Clic4	-0.555766
Leptin	Gbp4	-0.554904
Leptin	Irgm1	-0.540541
Leptin	Tmem141	0.471842
Leptin	Mid1	0.425905
Leptin	Dusp19	0.407474
Leptin	Samhd1	-0.396573
Leptin	Actn2	0.394639
Leptin	Pim1	-0.368119
Leptin	G0s2	0.350141
Leptin	Igkc	0.347776
Leptin	Id3	0.331706
Leptin	Hba-a2	0.327497
Leptin	Cep164	0.287432
Leptin	Tspan32	0.2716
Leptin	Flad1	0.271464
Leptin	Cd8b1	0.269203
Leptin	Rgcc	0.265666
Leptin	Cxcr3	0.261934
Leptin	Ccdc32	0.259313
Leptin	Gstt2	0.259191
Leptin	Ypel3	0.252644
Leptin	Hist1h1e	0.252448
Leptin	S1pr4	0.249873
Leptin	Dhrs7	0.249197
Leptin	Cd3g	0.247499
Leptin	Emc9	0.246967
Leptin	Ramp1	0.244955
Leptin	Tesc	0.243453
Leptin	Acp5	0.240934
Leptin	Tdrp	0.240383
Leptin	Timp2	0.239864
Leptin	Tsr3	0.238127
Leptin	Fam58b	0.233832
Leptin	Uba52	-0.233209
HGF	Chil3	-3.96961
HGF	Cxcl10	-2.67
HGF	F13a1	-2.55736
HGF	Ccl12	-2.35289
HGF	Fn1	-2.30357
HGF	AA467197	-2.17028
HGF	Cxcl9	-1.99527
HGF	Gzmb	-1.79286
HGF	Ccl17	-1.74184
HGF	Wfdc17	-1.57477
HGF	Il1rn	-1.5554
HGF	Hbb-bs	-1.43201
HGF	Ifi207	-1.41361
HGF	Eps8l1	-1.34142
HGF	Ccl9	-1.33466
HGF	Gpr141	-1.28029
HGF	Lilr4b	-1.27855
HGF	Isg15	-1.27014
HGF	Bcl3	-1.14445
HGF	Cdkn1a	-1.10864
HGF	Serpina3g	-1.05461
HGF	Ifitm1	-1.05181
HGF	Socs3	-1.015
HGF	Sowahc	-1.00319
HGF	Ccl22	-0.990027
HGF	Ifi204	-0.985989
HGF	Il1b	-0.964247
HGF	Gbp2	-0.950924
HGF	Mt1	-0.93238
HGF	Fabp5	-0.903124
HGF	Clic4	-0.902771
HGF	Atf3	-0.884699
HGF	Marco	-0.882439
HGF	Ifi205	-0.870131
HGF	Gm9888	0.865849
HGF	Ifitm2	-0.864959
HGF	Ifitm3	-0.86307
HGF	Pirb	-0.849604
HGF	AC146911.1	0.84851
HGF	Gadd45g	-0.848007
HGF	Litaf	-0.807345
HGF	Csf2rb	-0.803123
HGF	Gbp5	-0.799316
HGF	Clec10a	-0.776664
HGF	A530021J07Rik	0.775546
HGF	Ms4a6c	-0.75851
HGF	Pkib	-0.738571
HGF	Bcl2a1a	-0.735717
HGF	Scimp	-0.729856
HGF	Il10ra	-0.727919
HGF	Cish	-0.723013
HGF	Plek	-0.704213
HGF	Ccnd1	-0.701914
HGF	Socs1	-0.688885
HGF	Stx11	-0.686586
HGF	Serpinb9	-0.685882
HGF	Irf5	-0.683453
HGF	Cst3	-0.65827
HGF	Ampd1	0.65135
HGF	Fgr	-0.64741
IL6	Gm26802	1.35159
IL6	Iigp1	-1.11725
IL6	Hspa1a	1.05203
IL6	Gbp2	-1.04021
IL6	Fosb	0.973953
IL6	Hspa1b	0.933824
IL6	Klf4	0.930676
IL6	Socs3	-0.929783
IL6	Fos	0.921671
IL6	Hacl1	0.824294
IL6	Irgm2	-0.726201
IL6	Sik1	0.701465
IL6	Gm42670	0.6963
IL6	Jun	0.667626
IL6	Igtp	-0.666064
IL6	Ppa1	-0.606991
IL6	Bcl3	-0.571518
IL6	Gm47283	-0.567549
IL6	Rhob	0.549394
IL6	Ifi47	-0.547006
IL6	Ppp1r15a	0.545459
IL6	Stat1	-0.503377
IL6	Dusp1	0.501579
IL6	Rgs2	0.499785
IL6	Hist1h2ae	0.488804
IL6	Gbp7	-0.474206
IL6	Klf6	0.441604
IL6	Zbp1	-0.436047
IL6	Dbp	0.435142
IL6	Gbp4	-0.42429
IL6	Hist1h1e	0.415221
IL6	Socs1	-0.412782
IL6	H2-M2	0.402815
IL6	Stip1	-0.402577
IL6	Tbc1d4	0.402296
IL6	S100a4	0.388262
IL6	Hist1h1c	0.381946
IL6	Ephx1	0.380415
IL6	Plin3	0.365837
IL6	Fbrsl1	0.361249
IL6	Btg2	0.358044
IL6	Ly6a	-0.357808
IL6	Tnfaip3	0.355825
IL6	Samhd1	-0.340539
IL6	Cd7	0.338468
IL6	Tmem176a	0.335636
IL6	Cirbp	0.331019
IL6	Il21r	-0.330407
IL6	Baz2b	0.325049
IL6	Parp14	-0.312597
IL6	Ctsh	0.306968
IL6	Ptpn1	-0.29223
IL6	Mat2a	-0.290249
IL6	Ccnd2	-0.288319
IL6	Cacybp	-0.283995
IL6	Ccnd3	-0.279579
IL6	Ifi203	-0.27943
IL6	Junb	0.277461
IL6	Cdkn1b	0.272315
IL6	Hspa8	-0.27187
IL15	Acod1	4.4504
IL15	Cxcl10	4.3928
IL15	Chil3	3.86115
IL15	Prtn3	3.80238
IL15	Gzmb	3.79423
IL15	Gm4814	-3.70764
IL15	Nrg1	3.70517
IL15	Batf2	3.63955
IL15	Vcan	3.55489
IL15	Trem2	3.53121
IL15	Fcgr1	3.43359
IL15	F13a1	3.43315
IL15	Cxcl9	3.36146
IL15	C1rl	3.34203
IL15	Plcb1	3.32879
IL15	Hp	3.32366
IL15	Fcgr4	3.28462
IL15	Fn1	3.24799
IL15	Klra2	3.14226
IL15	Ifitm6	3.13749
IL15	F10	3.11485
IL15	Lif	3.08191
IL15	Ifi204	3.0336
IL15	Ccr1	3.02295
IL15	Dmkn	3.02173
IL15	Pstpip2	2.93265
IL15	Mgst1	2.92735
IL15	Gm4841	2.90245
IL15	Gpld1	2.89472
IL15	Serpina3f	2.88709
IL15	Gpr141	2.86155
IL15	Il27	2.81092
IL15	Ifi207	2.79465
IL15	F830016B08Rik	2.7665
IL15	Ifi211	2.73798
IL15	Slfn4	2.71882
IL15	Tarm1	2.71162
IL15	Saa3	2.69916
IL15	Clec4e	2.67475
IL15	Rhou	2.6493
IL15	Ifng	2.62227
IL15	AI839979	2.6028
IL15	Msr1	2.59138
IL15	Ubd	2.58068
IL15	Ifitm3	2.52253
IL15	Mmp8	2.47182
IL15	Gda	2.46782
IL15	Steap4	2.46407
IL15	Gm4951	2.45038
IL15	Ifi205	2.44112
IL15	Olfr56	2.43432
IL15	Serpina3g	2.41028
IL15	Mfsd2a	2.37543
IL15	Arl4d	-2.3729
IL15	Lilr4b	2.3215
IL15	Ms4a6d	2.31947
IL15	Cd177	2.31327
IL15	Atf3	2.30464
IL15	Fpr2	2.28801
IL15	Dgkg	2.26335
IL19	Chil3	-3.26867
IL19	Cd14	-2.89793
IL19	Fn1	-2.84033
IL19	Ifitm1	-2.71985
IL19	Cxcl10	-2.61916
IL19	Ccl12	-2.54961
IL19	F13a1	-2.49653
IL19	Gm21887	-2.31354
IL19	Emilin2	-2.2939
IL19	Ifitm6	-2.28776
IL19	Mgst1	-2.12175
IL19	Hp	-1.99218
IL19	Il1rn	-1.87382
IL19	Slc11a1	-1.86604
IL19	Serpina3f	-1.84503
IL19	Nlrp3	-1.83337
IL19	Cxcl9	-1.75473
IL19	Gzmb	-1.75098
IL19	Ifi204	-1.73509
IL19	Dab2	-1.68505
IL19	Clec4n	-1.66934
IL19	Ifitm3	-1.6589
IL19	Tgm2	-1.61174
IL19	Ifit3b	-1.56601
IL19	Ccr1	-1.56342
IL19	Ccl9	-1.55419
IL19	Wfdc17	-1.53302
IL19	Ccl6	-1.52367
IL19	Pik3ap1	-1.51232
IL19	Cdkn2a	-1.4916
IL19	Hmox1	-1.44322
IL19	Gda	-1.4414
IL19	Oas2	-1.42251
IL19	Rsad2	-1.41895
IL19	Ifi207	-1.37965
IL19	Cox6a2	-1.34912
IL19	Fcgr2b	-1.34293
IL19	Tlr2	-1.33386
IL19	Bst1	-1.32062
IL19	Gatm	-1.28577
IL19	Lilr4b	-1.28419
IL19	Iigp1	-1.27765
IL19	Ifi205	-1.27568
IL19	Nupr1	-1.25673
IL19	Pkib	-1.24644
IL19	Nr1h3	-1.24131
IL19	Vpreb3	-1.235
IL19	Arl11	-1.23444
IL19	Cd79a	-1.23435
IL19	Cd209a	-1.23139
IL19	Isg15	-1.22987
IL19	Rab3il1	-1.21861
IL19	Fcgr3	-1.21504
IL19	Gbp2	-1.20974
IL19	Ifitm2	-1.20544
IL19	Ms4a1	-1.19395
IL19	Siglech	-1.19352
IL19	Slamf9	-1.18142
IL19	Pira2	-1.17798
IL19	Ccl2	-1.17629
IL20	Gzmb	-2.07706
IL20	Gm21887	-1.88237
IL20	Cxcl10	-1.78099
IL20	Slc15a2	-1.73185
IL20	Rsad2	-1.62311
IL20	Cxcl9	-1.59764
IL20	Ifit3b	-1.59384
IL20	Ifit3	-1.53428
IL20	Isg15	-1.48121
IL20	Gab2	-1.35805
IL20	Trim30b	-1.33531
IL20	Gm30211	-1.30813
IL20	Stxbp1	-1.26715
IL20	Pltp	-1.26318
IL20	Oasl1	-1.25932
IL20	Mzb1	-1.25856
IL20	Procr	-1.24427
IL20	Fcrla	-1.21859
IL20	Iigp1	-1.20313
IL20	Oasl2	-1.19921
IL20	Ly6d	-1.17138
IL20	Scd1	-1.16413
IL20	Arhgap28	-1.16209
IL20	Spns3	-1.16141
IL20	Blnk	-1.15531
IL20	Gm47283	-1.14867
IL20	Clec4n	-1.14256
IL20	Vpreb3	-1.14231
IL20	Gm31243	-1.1373
IL20	Ifi44	-1.11951
IL20	Ebf1	-1.10471
IL20	Mid1	-1.09876
IL20	Oas2	-1.09703
IL20	Gadd45g	-1.08103
IL20	Gpr35	-1.08042
IL20	Isg20	-1.07781
IL20	Serpina3g	-1.07228
IL20	Tnip3	-1.0669
IL20	Ccrl2	-1.06004
IL20	Gbp2	-1.04275
IL20	Fcmr	-1.02579
IL20	Siglecg	-1.02416
IL20	Lmo2	-1.02308
IL20	Cd79a	-1.02267
IL20	Ifit1	-1.01382
IL20	Cd19	-1.01055
IL20	Bst1	-1.00516
IL20	Sdc4	-0.999457
IL20	Scimp	-0.997972
IL20	Guca1a	-0.995983
IL20	Atf3	-0.995626
IL20	Pax5	-0.989196
IL20	Fcer2a	-0.986443
IL20	Iglc2	-0.979028
IL20	Ly6a	-0.976597
IL20	Irf8	-0.96657
IL20	Mef2c	-0.962928
IL20	Bank1	-0.953056
IL20	Fcgr2b	-0.946082
IL20	Cd38	-0.945622
IL1Ra	Hspa1b	-3.25095
IL1Ra	Hspa1a	-3.07609
IL1Ra	Ifit3b	-2.44568
IL1Ra	Rsad2	-2.33984
IL1Ra	Oas2	-2.25866
IL1Ra	Ifi204	-2.19027
IL1Ra	Ifit3	-2.15832
IL1Ra	Oasl2	-2.08636
IL1Ra	Isg15	-1.93334
IL1Ra	Cmpk2	-1.81407
IL1Ra	S100a8	-1.77096
IL1Ra	Ifi44	-1.69537
IL1Ra	Isg20	-1.65874
IL1Ra	Ifit1	-1.58992
IL1Ra	Oasl1	-1.55331
IL1Ra	Iigp1	-1.52317
IL1Ra	Gbp6	-1.49054
IL1Ra	Oas1a	-1.47823
IL1Ra	Tgtp1	-1.4171
IL1Ra	Ifi211	-1.35538
IL1Ra	Trim30c	-1.3541
IL1Ra	Irf7	-1.31953
IL1Ra	Dhx58	-1.29568
IL1Ra	Ifi207	-1.29063
IL1Ra	Ifitm3	-1.28895
IL1Ra	Rtp4	-1.25452
IL1Ra	Ms4a6d	-1.157
IL1Ra	Eps8l1	-1.15642
IL1Ra	Oas3	-1.13528
IL1Ra	Ifit2	-1.12671
IL1Ra	Fcmr	-1.12163
IL1Ra	Cd79a	-1.08746
IL1Ra	Usp18	-1.07356
IL1Ra	Iglc2	-1.03444
IL1Ra	Fcer2a	-1.01893
IL1Ra	Gbp2	-1.01817
IL1Ra	Il18bp	-1.00717
IL1Ra	Phf11a	-0.996485
IL1Ra	Ly6a	-0.99064
IL1Ra	Slfn5	-0.984205
IL1Ra	Tnfrsf13c	-0.983433
IL1Ra	Cd22	-0.976408
IL1Ra	Phf11d	-0.974862
IL1Ra	Cd19	-0.959685
IL1Ra	Igtp	-0.950509
IL1Ra	Ighd	-0.949352
IL1Ra	Zbp1	-0.937983
IL1Ra	Xaf1	-0.925703
IL1Ra	Ms4a1	-0.925024
IL1Ra	Ly6d	-0.913411
IL1Ra	Gm31243	-0.888371
IL1Ra	Serpina3g	-0.863157
IL1Ra	Bank1	-0.862491
IL1Ra	Tgtp2	-0.855974
IL1Ra	Parp12	-0.844662
IL1Ra	Ebf1	-0.837816
IL1Ra	Bcl3	-0.833457
IL1Ra	Ifih1	-0.785518
IL1Ra	Pkib	-0.780277
IL1Ra	Trim30d	-0.779534
IL24	Cxcl10	-2.98987
IL24	Iglc1	-2.84246
IL24	Pax5	-2.34793
IL24	Cd79a	-2.25563
IL24	Ebf1	-2.10111
IL24	Gm31243	-2.03441
IL24	Cr2	-1.98057
IL24	Tnfrsf13c	-1.95352
IL24	Ms4a1	-1.94523
IL24	Gbp2b	1.89623
IL24	Isg15	-1.86596
IL24	Vpreb3	-1.80147
IL24	Fcmr	-1.77597
IL24	Ighd	-1.75105
IL24	Cd19	-1.7248
IL24	Fcrl1	-1.68852
IL24	Rsad2	-1.68161
IL24	Iglc2	-1.66047
IL24	Bank1	-1.63431
IL24	Gm30211	-1.62022
IL24	Fcer2a	-1.57939
IL24	Scd1	-1.53241
IL24	Cd22	-1.52983
IL24	Phactr3	1.51238
IL24	Chst3	-1.50784
IL24	Cxcr5	-1.43469
IL24	Cd79b	-1.39712
IL24	Cd5l	1.35
IL24	Ccl8	1.30993
IL24	Oasl1	-1.29189
IL24	Cmpk2	-1.2892
IL24	Cyp4f18	-1.27998
IL24	Ifit3	-1.23949
IL24	Ifit2	-1.20924
IL24	Ifit1	-1.19962
IL24	Oasl2	-1.15659
IL24	Mzb1	-1.03485
IL24	Klra4	1.01471
IL24	Iigp1	-1.01384
IL24	Gbp6	-0.998334
IL24	Iglc3	-0.990969
IL24	Ifitm3	-0.976964
IL24	Isg20	-0.968478
IL24	Styk1	0.95511
IL24	Klra9	0.952904
IL24	Siglecg	-0.925031
IL24	Ralgps2	-0.911183
IL24	C1qb	0.899482
IL24	Tnfsf12	0.897256
IL24	Socs3	-0.885031
IL24	C1qc	0.854244
IL24	Slfn5	-0.828853
IL24	Klra7	0.826258
IL24	Mef2c	-0.826217
IL24	Zbp1	-0.824565
IL24	Gzma	0.816558
IL24	Dok3	-0.798303
IL24	Ppa1	-0.797867
IL24	Dhx58	-0.794177
IL24	Cd209b	0.793492
IL34	Cxcl10	-2.56003
IL34	Iglc1	-2.14483
IL34	Vpreb3	-1.70783
IL34	Pax5	-1.70241
IL34	Ifi204	-1.67264
IL34	Iglc2	-1.61927
IL34	Fcmr	-1.6137
IL34	Ebf1	-1.60518
IL34	Cd19	-1.60369
IL34	Dab2	-1.60231
IL34	Fcer2a	-1.56229
IL34	Cd79a	-1.55203
IL34	Lilr4b	-1.54825
IL34	Ms4a1	-1.52321
IL34	Scd1	-1.50982
IL34	Gzmb	-1.5024
IL34	Wfdc17	-1.49245
IL34	Cr2	-1.45961
IL34	Tnfrsf13c	-1.4375
IL34	Cd79b	-1.40942
IL34	Mzb1	-1.40628
IL34	Gm31243	-1.40315
IL34	Fcrl1	-1.36507
IL34	Igkc	-1.33778
IL34	Bank1	-1.33693
IL34	Gadd45g	-1.33674
IL34	Siglecg	-1.32418
IL34	Cd22	-1.32041
IL34	Ifi211	-1.31708
IL34	Iglc3	-1.28685
IL34	Il1b	-1.28157
IL34	Mef2c	-1.23344
IL34	Rasgrp3	-1.21429
IL34	Ifi205	-1.17857
IL34	Cd38	-1.12667
IL34	Fcrla	-1.10162
IL34	Ly6d	-1.09106
IL34	Cd302	-1.05049
IL34	Slamf8	-1.04161
IL34	Dok3	-1.03074
IL34	Serpina3g	-0.985429
IL34	Ighd	-0.974731
IL34	Themis2	-0.969485
IL34	5430431A17Rik	0.959915
IL34	H2-DMb2	-0.943066
IL34	Socs3	-0.938925
IL34	Hhex	-0.925246
IL34	Blnk	-0.919686
IL34	Syk	-0.90212
IL34	Frmd4b	-0.898636
IL34	Pkib	-0.896088
IL34	Fabp5	-0.895577
IL34	March1	-0.889356
IL34	Metrnl	-0.881439
IL34	Tgfbi	-0.879617
IL34	Lmo2	-0.87093
IL34	Scimp	-0.868622
IL34	Trnp1	0.853863
IL34	Napsa	-0.84752
IL34	Gm47283	-0.845502
IL30	Chil3	-4.04806
IL30	Cxcl10	-3.44883
IL30	Ifit3b	-3.19699
IL30	Rsad2	-3.10897
IL30	Hp	-3.03702
IL30	Ifit3	-2.64797
IL30	Ifitm1	-2.44926
IL30	Oasl2	-2.35444
IL30	Ifitm6	-2.32781
IL30	Fcgr1	-2.30495
IL30	Ifi204	-2.2354
IL30	Il1b	-2.22776
IL30	Ifit1	-2.16796
IL30	Isg15	-2.09048
IL30	Cxcl9	-1.94268
IL30	Iigp1	-1.91027
IL30	Fn1	-1.88391
IL30	S100a9	-1.8629
IL30	Serpina3f	-1.8296
IL30	S100a8	-1.79266
IL30	Isg20	-1.71801
IL30	Oas2	-1.67736
IL30	Oasl1	-1.63565
IL30	Ifitm3	-1.58728
IL30	Ms4a6d	-1.58257
IL30	Cmpk2	-1.57669
IL30	Ifi44	-1.51525
IL30	Oas3	-1.48079
IL30	Usp18	-1.47948
IL30	Gm19951	-1.4577
IL30	Gbp2	-1.41513
IL30	Trim30c	-1.40303
IL30	Ifi211	-1.40065
IL30	Irf7	-1.3407
IL30	Rtp4	-1.33399
IL30	Lilr4b	-1.32752
IL30	Gzmb	-1.3167
IL30	Ifit2	-1.288
IL30	Tgtp1	-1.21567
IL30	Zbp1	-1.19497
IL30	Phf11d	-1.19258
IL30	Trim30b	-1.18693
IL30	Gm21887	1.14549
IL30	Slfn5	-1.13309
IL30	Ifi205	-1.13174
IL30	Tubb6	-1.10945
IL30	Gadd45g	-1.10173
IL30	Wfdc17	-1.09904
IL30	Igtp	-1.0726
IL30	Irgm2	-1.05503
IL30	Ifih1	-1.04335
IL30	Sh3pxd2b	-1.04219
IL30	Ldlr	-1.03972
IL30	Gda	-1.02222
IL30	Parp12	-1.01351
IL30	Ifi207	-1.00474
IL30	Ifitm2	-0.994674
IL30	Oas1a	-0.990607
IL30	Gab2	-0.987958
IL30	Serpina3g	-0.982988
CD27L	Ccl12	-3.02654
CD27L	Ccl2	-2.58762
CD27L	Cxcl10	-2.23903
CD27L	Gzmb	-2.16093
CD27L	AA467197	-2.11247
CD27L	Ifi204	-2.02331
CD27L	Ifit3b	-1.98766
CD27L	Ifit3	-1.94873
CD27L	Isg15	-1.90665
CD27L	Hp	-1.80438
CD27L	Ifitm6	-1.78354
CD27L	Isg20	-1.68809
CD27L	Oasl2	-1.65663
CD27L	Rsad2	-1.63657
CD27L	Ifit1	-1.56102
CD27L	Clec4n	-1.55201
CD27L	Ccl17	-1.51492
CD27L	Ifitm3	-1.47783
CD27L	Atf3	-1.39757
CD27L	Ms4a6d	-1.36455
CD27L	Oas1a	-1.34816
CD27L	Cmpk2	-1.34619
CD27L	Ifi207	-1.33747
CD27L	Iigp1	-1.26052
CD27L	Oasl1	-1.25564
CD27L	Cr2	-1.18145
CD27L	Lilr4b	-1.17626
CD27L	Irf7	-1.09476
CD27L	Ifi211	-1.09454
CD27L	Serpina3g	-1.08102
CD27L	Usp18	-1.05049
CD27L	Rtp4	-1.04635
CD27L	Metrnl	-1.04505
CD27L	Zbp1	-1.01074
CD27L	Scimp	-1.00529
CD27L	Gbp6	-1.00491
CD27L	Cebpb	-0.98699
CD27L	Gbp2	-0.955938
CD27L	Ly6a	-0.954062
CD27L	Slfn5	-0.942204
CD27L	Dhx58	-0.938142
CD27L	Gadd45g	-0.929462
CD27L	Pkib	-0.913642
CD27L	Oas3	-0.90901
CD27L	Irgm1	-0.848386
CD27L	Bcl3	-0.843076
CD27L	Igtp	-0.802594
CD27L	Ifih1	-0.79078
CD27L	Sdc4	-0.773091
CD27L	Eif2ak2	-0.771915
CD27L	Lyn	-0.770421
CD27L	Xaf1	-0.738178
CD27L	AW011738	-0.73473
CD27L	Gbp3	-0.73001
CD27L	Gzma	-0.729289
CD27L	Plek	-0.72202
CD27L	Plcg2	-0.718876
CD27L	Gbp7	-0.713438
CD27L	Pxdc1	-0.710219
CD27L	Socs3	-0.707698
TWEAK	Ighg2c	-4.44135
TWEAK	Cxcl10	-3.14515
TWEAK	Gzmb	-1.71426
TWEAK	Ifi204	-1.68497
TWEAK	Gda	-1.29285
TWEAK	Lilr4b	-1.22226
TWEAK	Gadd45g	-1.18315
TWEAK	Iigp1	-1.07135
TWEAK	Socs3	-1.05442
TWEAK	Iglc2	-0.876687
TWEAK	Serpina3g	-0.829453
TWEAK	Hspa1a	-0.784163
TWEAK	Cish	-0.747695
TWEAK	Ppa1	-0.699531
TWEAK	Slc6a19	0.633901
TWEAK	Bcl3	-0.58738
TWEAK	Slc15a2	0.57537
TWEAK	Ccr9	0.55108
TWEAK	Hid1	0.523863
TWEAK	Cd79a	-0.518768
TWEAK	Odc1	-0.509989
TWEAK	Apol7e	0.50526
TWEAK	Zbp1	-0.502507
TWEAK	Guf1	0.485439
TWEAK	AY036118	-0.482517
TWEAK	Ide	-0.480647
TWEAK	Usp50	0.480582
TWEAK	Socs1	-0.469035
TWEAK	Gm10076	0.46449
TWEAK	Lcn4	0.444628
TWEAK	Rpgrip1	0.428084
TWEAK	Rapgef4	0.367734
TWEAK	Cd7	0.347591
TWEAK	Jun	-0.344047
TWEAK	Trp53i13	0.334592
TWEAK	Ubl7	0.333798
TWEAK	Cd96	0.33327
TWEAK	Klrd1	0.331631
TWEAK	Atp1b1	0.329342
TWEAK	AC149090.1	0.321241
TWEAK	Pim1	-0.321099
TWEAK	Arl6ip5	0.320789
TWEAK	Ier2	-0.313278
TWEAK	Ly6c2	0.30572
TWEAK	Ypel3	0.305594
TWEAK	Ifi27l2a	0.303515
TWEAK	R3hdm4	0.290903
TWEAK	Ncl	-0.288427
TWEAK	Cd8b1	0.287948
TWEAK	Lars2	-0.283458
TWEAK	Mta3	0.283382
TWEAK	Junb	-0.277061
TWEAK	Themis	0.275125
TWEAK	Arl5c	0.270723
TWEAK	Actn1	0.269924
TWEAK	Cd3e	0.267374
TWEAK	Gramd3	0.26619
TWEAK	Mrpl20	-0.265958
TWEAK	Fam46a	0.25884
TWEAK	Tbxa2r	0.257828
OX40L	Cxcl10	-3.09884
OX40L	Rsad2	-2.18278
OX40L	Isg15	-1.99334
OX40L	Ccl12	-1.91459
OX40L	Ifit3b	-1.91397
OX40L	Hp	-1.89056
OX40L	Ifit3	-1.73612
OX40L	Oasl2	-1.61465
OX40L	Ifit1	-1.56439
OX40L	Iigp1	-1.53574
OX40L	Oas2	-1.47378
OX40L	Oasl1	-1.45467
OX40L	Ifi204	-1.44062
OX40L	Trim30b	-1.285
OX40L	Isg20	-1.28281
OX40L	Cmpk2	-1.27095
OX40L	Cxcl9	-1.22863
OX40L	Ighg1	-1.18583
OX40L	Gm12185	-1.08557
OX40L	Gbp2	-1.07657
OX40L	Socs3	-1.05588
OX40L	Rtp4	-1.01437
OX40L	Ifitm3	-0.9933
OX40L	Ms4a6d	-0.966345
OX40L	Parp12	-0.955862
OX40L	Zbp1	-0.948994
OX40L	Oas3	-0.938358
OX40L	Usp18	-0.917248
OX40L	Ly6a	-0.895101
OX40L	Igtp	-0.885614
OX40L	Irf7	-0.875208
OX40L	Gm31243	-0.86902
OX40L	Xaf1	-0.821701
OX40L	Dhx58	-0.804041
OX40L	Gadd45g	-0.796727
OX40L	Gm47283	-0.793336
OX40L	Ifit2	-0.788977
OX40L	Slfn5	-0.775091
OX40L	Irgm2	-0.76942
OX40L	Cd79a	-0.747964
OX40L	Irgm1	-0.740239
OX40L	Ppa1	-0.717191
OX40L	Socs1	-0.688145
OX40L	Ccl8	-0.665259
OX40L	Gbp6	-0.662732
OX40L	Gbp7	-0.662188
OX40L	Bank1	-0.650445
OX40L	Serpina3g	-0.647898
OX40L	Ifit1bl1	-0.640281
OX40L	Rnf213	-0.639471
OX40L	Ly6c1	-0.637826
OX40L	Tgtp2	-0.629853
OX40L	Gm42418	0.627797
OX40L	Fam26f	-0.626803
OX40L	Gbp5	-0.625615
OX40L	Stat2	-0.622728
OX40L	Ifih1	-0.608514
OX40L	Phf11b	-0.605784
OX40L	Ebf1	-0.592599
OX40L	Ddx60	-0.591007
CD30L	Cxcl10	-1.78465
CD30L	Socs3	-1.20672
CD30L	Iigp1	-1.05669
CD30L	Hba-a1	0.951578
CD30L	Hba-a2	0.898944
CD30L	Ebf1	-0.895818
CD30L	Slc15a2	0.887332
CD30L	Cebpb	-0.852128
CD30L	Dusp1	-0.809428
CD30L	Cd79a	-0.783955
CD30L	Hbb-bs	0.754384
CD30L	Ms4a1	-0.719362
CD30L	Cish	-0.668743
CD30L	Igfbp4	-0.65484
CD30L	Cd274	-0.62098
CD30L	Igtp	-0.613865
CD30L	Ppa1	-0.613853
CD30L	Socs1	-0.611477
CD30L	Ddit4	0.597626
CD30L	Fcmr	-0.578899
CD30L	Gm9493	-0.540532
CD30L	Junb	-0.53449
CD30L	Pigh	0.527359
CD30L	Zbp1	-0.515758
CD30L	Zadh2	0.474152
CD30L	Bcl3	-0.472374
CD30L	Tmco6	0.460356
CD30L	Hist1h2bc	0.44856
CD30L	Lrrcc1	0.439656
CD30L	Ly6a	-0.42098
CD30L	Atp1b1	0.407989
CD30L	Cd7	0.401751
CD30L	Hspa1b	0.397827
CD30L	Fbrsl1	0.39528
CD30L	Abhd2	0.383023
CD30L	Ifi47	-0.381797
CD30L	AY036118	-0.362233
CD30L	Vipr1	0.350478
CD30L	Klrd1	0.347682
CD30L	Gdi1	0.340096
CD30L	Tyrobp	0.331357
CD30L	Cxcr4	0.331268
CD30L	Ccdc88a	0.32897
CD30L	Trim5	0.326375
CD30L	Rapgef4	0.307497
CD30L	Unc5cl	0.304378
CD30L	Klf2	-0.300922
CD30L	Creg1	0.300895
CD30L	Gm20186	0.281269
CD30L	Gm2a	0.279381
CD30L	Dhrs7	0.271102
CD30L	Fcer1g	0.270077
CD30L	Itga4	0.267538
CD30L	Tsc22d3	0.266836
CD30L	Dnajb4	0.266005
CD30L	Ahnak	0.262005
CD30L	Eif5a	-0.253337
CD30L	Hbb-bt	0.243837
CD30L	Itgb1	0.242532
CD30L	Rnaset2b	0.241804
GITRL	Ccl2	-2.58632
GITRL	Slc15a2	-2.00709
GITRL	Emilin2	-1.91419
GITRL	Ccl12	-1.9093
GITRL	Fcgr1	-1.86658
GITRL	Ier3	-1.77072
GITRL	Cxcl10	-1.66915
GITRL	Ifi204	-1.41129
GITRL	Ifitm3	-1.39616
GITRL	Clec4n	-1.34841
GITRL	Cd302	-1.20457
GITRL	Wfdc17	-1.11832
GITRL	Mafb	-1.11688
GITRL	Cxcl9	-1.11609
GITRL	Ifitm2	-1.03038
GITRL	Tmem106a	-0.843885
GITRL	Isg20	-0.834662
GITRL	Cebpb	-0.828136
GITRL	Iigp1	-0.822346
GITRL	Oasl2	-0.816246
GITRL	Socs3	-0.813076
GITRL	Gbp2	-0.750985
GITRL	Ly6a	-0.735349
GITRL	Cd274	-0.7249
GITRL	Gm42418	0.647828
GITRL	Fos	-0.639317
GITRL	Lars2	0.626003
GITRL	Lgals3	-0.569301
GITRL	Pnp	-0.534251
GITRL	Hspa1b	-0.52984
GITRL	Isg15	-0.517691
GITRL	Irf7	-0.516211
GITRL	Hbb-bs	-0.507831
GITRL	Socs1	-0.506141
GITRL	AY036118	0.499381
GITRL	Hspa1a	-0.473606
GITRL	Irgm1	-0.461137
GITRL	Rtp4	-0.432621
GITRL	Bcl3	-0.401422
GITRL	Ppa1	-0.378601
GITRL	Ifi27l2a	-0.360271
GITRL	Lyz2	-0.357809
GITRL	Apoe	-0.337828
GITRL	Igtp	-0.332123
GITRL	Cxcr3	0.326816
GITRL	Ifi35	-0.322273
GITRL	Samhd1	-0.302513
GITRL	Alyref	-0.288963
GITRL	Mthfd2	-0.283803
GITRL	Chmp4b	-0.273008
GITRL	Gm10076	-0.272204
GITRL	Cst3	-0.269118
GITRL	H2-Ab1	-0.266651
GITRL	Txn1	-0.258862
GITRL	Cd74	-0.251397
GITRL	Cyth1	-0.249505
GITRL	H2-T23	-0.238072
GITRL	Tap2	-0.23643
GITRL	Zfp36	-0.234661
GITRL	Cdc42ep3	0.232345
BAFF	Glycam1	-2.34085
BAFF	Ifit3b	-2.19906
BAFF	Hspa1b	-1.89469
BAFF	Hspa1a	-1.87317
BAFF	Ace	1.74752
BAFF	Hist1h3c	1.74227
BAFF	Kif18b	1.72683
BAFF	Cxcl10	-1.59459
BAFF	Bub1	1.58989
BAFF	Ifit3	-1.55701
BAFF	Stil	1.50655
BAFF	Iglc1	-1.4985
BAFF	1500009L16Rik	1.48872
BAFF	Hist1h2ab	1.47272
BAFF	Ncapg	1.4508
BAFF	Aunip	1.40263
BAFF	Rrm2	1.40142
BAFF	Kif20a	1.40012
BAFF	Hist1h2ae	1.38898
BAFF	Anln	1.37467
BAFF	Pclaf	1.37463
BAFF	Ccna2	1.37281
BAFF	Ccnb2	1.34631
BAFF	Lrr1	1.34221
BAFF	Aspm	1.33802
BAFF	Jchain	1.33356
BAFF	Isg15	-1.31385
BAFF	Fcmr	-1.29806
BAFF	Hist1h1b	1.29649
BAFF	Sgo2a	1.29422
BAFF	Ska1	1.2759
BAFF	Nxpe4	1.26094
BAFF	Mxd3	1.25491
BAFF	Depdc1a	1.25175
BAFF	Cdca3	1.24437
BAFF	Nek2	1.23438
BAFF	Isg20	-1.22828
BAFF	Kif15	1.22776
BAFF	Sapcd2	1.20992
BAFF	Nuf2	1.20314
BAFF	1300017J02Rik	1.20154
BAFF	Spag5	1.19585
BAFF	E2f8	1.19394
BAFF	Kif14	1.18925
BAFF	Ska3	1.1882
BAFF	Birc5	1.18074
BAFF	Fabp1	1.17369
BAFF	Gm1673	1.17292
BAFF	Iigp1	-1.16421
BAFF	Esco2	1.16177
BAFF	Cdca2	1.1607
BAFF	Car5b	1.1572
BAFF	Cenpf	1.1536
BAFF	Mki67	1.15033
BAFF	Ube2c	1.14779
BAFF	Oasl1	-1.14651
BAFF	Rsad2	-1.1451
BAFF	Nusap1	1.14435
BAFF	Oasl2	-1.14364
BAFF	Ttc36	1.14187
TRAIL	Ccl12	-3.15407
TRAIL	Cxcl10	-2.75535
TRAIL	Ifi204	-2.32065
TRAIL	Cxcl9	-1.90134
TRAIL	Rsad2	-1.63616
TRAIL	Gzmb	-1.57365
TRAIL	Ifitm3	-1.50443
TRAIL	Lilr4b	-1.31601
TRAIL	Serpina3g	-1.23885
TRAIL	Iigp1	-1.22464
TRAIL	Gbp2	-1.15874
TRAIL	Isg20	-1.13222
TRAIL	Ifitm2	-1.10807
TRAIL	Isg15	-1.09247
TRAIL	Gm43597	0.995926
TRAIL	Gadd45g	-0.9903
TRAIL	Bhlhe40	-0.924729
TRAIL	Bcl3	-0.896958
TRAIL	Map3k8	-0.865191
TRAIL	Cdkn1a	-0.793192
[truncated: 640 more rows]

## Sheet: cytokine_NCA_results
cytokine	n_p	n_n	mean_zp	mean_zn	delta	p	padj	signed_nlogp	rank
IFNγ	257	2594	0.206455	-0.0162457	0.222701	0.00324314	0.142698	2.48903	1
IL11	257	2594	0.102618	0.00825583	0.0943622	0.0915182	0.909442	1.03849	2
HGF	257	2594	0.0819173	-0.00886082	0.0907782	0.113084	0.909442	0.946599	3
IFNλ2	257	2594	0.104952	0.00686248	0.0980891	0.128458	0.909442	0.89124	4
IL17C	257	2594	0.0528831	-0.0197726	0.0726557	0.191894	0.909442	0.716939	5
IFNκ	257	2594	0.0870959	0.00224704	0.0848489	0.215795	0.909442	0.665958	6
VEGF	257	2594	0.0336762	-0.0156544	0.0493307	0.283334	0.909442	0.547701	7
IL22	257	2594	0.0729652	-0.00785694	0.0808221	0.329214	0.909442	0.482522	8
OX40L	257	2594	0.0340585	-0.0108688	0.0449273	0.350842	0.909442	0.454889	9
PBS	257	2594	0.0208904	-0.0155292	0.0364196	0.403627	0.934715	0.39402	10
IL30	257	2594	0.029065	0.00627133	0.0227937	0.507786	0.949268	0.29432	11
PSPN (Persephin)	257	2594	0.0428965	-0.0173163	0.0602128	0.516581	0.949268	0.286862	12
IL24	257	2594	0.0652325	0.0216002	0.0436323	0.602562	0.949268	0.219998	13
Noggin	257	2594	0.0299022	-0.00303791	0.0329401	0.617813	0.949268	0.209143	14
IL17E	257	2594	0.0271307	0.0104546	0.0166761	0.665698	0.949268	0.176723	15
MCSF	257	2594	-0.0189965	-0.0347704	0.0157739	0.719082	0.949268	0.143221	16
CD27L	257	2594	0.0218292	0.0131461	0.00868311	0.722591	0.949268	0.141107	17
GITRL	257	2594	0.022566	0.0141951	0.00837087	0.723663	0.949268	0.140464	18
TPO	257	2594	0.00997001	-0.011307	0.021277	0.810051	0.949268	0.0914874	19
IL31	257	2594	0.0538409	0.00447625	0.0493646	0.85405	0.949268	0.0685169	20
SCF	257	2594	0.0252209	0.0131171	0.0121037	0.93551	0.970563	0.0289515	21
TRAIL	257	2594	0.0136243	-0.00187509	0.0154994	0.970563	0.970563	0.0129762	22
Leptin	257	2594	-0.0296301	-0.0044416	-0.0251885	0.950684	0.970563	-0.0219637	23
IL5	257	2594	-0.0197774	-0.0170974	-0.00267997	0.919792	0.970563	-0.0363105	24
IL1Ra	257	2594	0.00710442	0.0159093	-0.00880492	0.862971	0.949268	-0.0640038	25
IL21	257	2594	-0.0369968	-0.0146614	-0.0223353	0.844401	0.949268	-0.0734515	26
TWEAK	257	2594	-0.00652544	0.000115027	-0.00664047	0.789979	0.949268	-0.102384	27
IL19	257	2594	-0.0249279	0.00173352	-0.0266614	0.763312	0.949268	-0.117298	28
IL17B	257	2594	-0.0321399	-0.00138156	-0.0307583	0.734767	0.949268	-0.13385	29
CD30L	257	2594	-0.0326686	0.0129279	-0.0455965	0.642366	0.949268	-0.192217	30
IL1β	257	2594	-0.0155316	0.0178964	-0.033428	0.630236	0.949268	-0.200497	31
BAFF	257	2594	-0.0131966	-0.00461265	-0.00858395	0.586936	0.949268	-0.231409	32
Decorin	257	2594	-0.0357907	0.0164066	-0.0521974	0.571284	0.949268	-0.243148	33
IL20	257	2594	-0.0233803	0.0157424	-0.0391227	0.530284	0.949268	-0.275491	34
ILY	257	2594	-0.0707779	-0.0172787	-0.0534992	0.450582	0.949268	-0.346226	35
FLT3L	257	2594	-0.0349503	0.00722073	-0.042171	0.377501	0.92278	-0.423082	36
IFNε	257	2594	-0.0627385	0.00638883	-0.0691273	0.351375	0.909442	-0.454229	37
LIGHT	257	2594	-0.0614282	0.00895628	-0.0703845	0.351006	0.909442	-0.454685	38
IL15	257	2594	-0.0304882	0.0216999	-0.0521882	0.285013	0.909442	-0.545135	39
IL2	257	2594	-0.0833588	-0.0245586	-0.0588001	0.245172	0.909442	-0.610528	40
IL6	257	2594	-0.0842804	0.000300978	-0.0845814	0.227998	0.909442	-0.642069	41
IL34	257	2594	-0.108609	-0.00284411	-0.105765	0.152454	0.909442	-0.816861	42
IL17F	257	2594	-0.0907758	-0.000460379	-0.0903154	0.122327	0.909442	-0.912476	43
TNFα	257	2594	-0.158981	-0.00665393	-0.152327	0.0326222	0.717689	-1.48649	44

## Sheet: IFNg_neighbour_DGE
gene	n_p	n_n	mean_zp	mean_zn	delta	p	padj
Lrrcc1	257	2594	0.217158	-0.00553693	0.222695	0.000508435	0.119352
Hk3	257	2594	0.137546	-0.0283428	0.165889	0.000572433	0.119352
Cd14	257	2594	-0.204468	0.0171029	-0.221571	0.00108399	0.150674
H2-T24	257	2594	0.13785	-0.0181256	0.155975	0.00597941	0.369731
Hspa1b	257	2594	0.0996748	-0.000826963	0.100502	0.00667566	0.369731
Tgtp2	257	2594	0.120788	0.0102483	0.11054	0.00708753	0.369731
Ddx60	257	2594	0.171129	-0.0116958	0.182825	0.00725108	0.369731
Syk	257	2594	0.137754	-0.0232401	0.160994	0.00857245	0.369731
Ypel3	257	2594	-0.142543	-0.0107275	-0.131816	0.00861179	0.369731
Eps8	257	2594	0.113417	-0.025636	0.139053	0.00919483	0.369731
Cd5l	257	2594	0.12026	0.00531525	0.114945	0.0097531	0.369731
Ifi47	257	2594	-0.103786	0.0271372	-0.130924	0.0120423	0.418471
Adam15	257	2594	0.107146	0.0145398	0.0926057	0.0133453	0.428077
Nupr1	257	2594	-0.078482	-0.0120901	-0.0663919	0.0162597	0.442695
Ahnak	257	2594	-0.158479	0.0153784	-0.173858	0.0169798	0.442695
Lilr4b	257	2594	0.0116877	-0.0031519	0.0148396	0.0169859	0.442695
Hbb-bs	257	2594	-0.039404	0.00252777	-0.0419318	0.0182822	0.443217
Emilin2	257	2594	-0.0554134	0.0114437	-0.0668571	0.0191317	0.443217
Marcks	257	2594	0.132805	-0.0211953	0.154	0.0244204	0.50439
Gbp6	257	2594	0.0849345	0.00804495	0.0768895	0.0250369	0.50439
Hpgd	257	2594	0.167646	0.0171358	0.15051	0.025401	0.50439
S100a1	257	2594	-0.0960526	0.0130398	-0.109092	0.0268595	0.50911
Dhrs7	257	2594	0.0992156	-0.0051983	0.104414	0.0295981	0.536626
Itga9	257	2594	0.117988	-0.0226862	0.140674	0.0378799	0.636613
Parvb	257	2594	0.106932	-0.0130287	0.11996	0.0402397	0.636613
Gbp8	257	2594	0.173762	0.0025042	0.171258	0.0432147	0.636613
Laptm5	257	2594	0.0961041	0.00377205	0.092332	0.044438	0.636613
Lilrb4a	257	2594	-0.0960083	0.000464428	-0.0964727	0.0449794	0.636613
Nav1	257	2594	0.147534	0.00555519	0.141979	0.04512	0.636613
Gm12185	257	2594	0.167237	0.000981385	0.166255	0.0518834	0.636613
C5ar1	257	2594	-0.052399	0.0145435	-0.0669424	0.0518844	0.636613
Gpr141	257	2594	-0.0848972	-0.0215493	-0.0633478	0.052615	0.636613
Mthfd2	257	2594	-0.101933	-0.00778391	-0.0941493	0.0535443	0.636613
Il18	257	2594	-0.103533	-0.00944856	-0.0940845	0.0556221	0.636613
Tap2	257	2594	0.087138	-0.0213212	0.108459	0.0558111	0.636613
P2ry6	257	2594	0.0691164	0.000338533	0.0687778	0.0563861	0.636613
Nr1h3	257	2594	0.219862	-0.0104719	0.230334	0.0564861	0.636613
Cyth1	257	2594	0.097838	0.0110453	0.0867927	0.061861	0.661384
Ifitm6	257	2594	-0.0670253	-0.0127255	-0.0542998	0.0626989	0.661384
Apoe	257	2594	-0.117854	-0.00140022	-0.116453	0.0634421	0.661384
Pik3ap1	257	2594	0.127966	-0.0174829	0.145449	0.0711658	0.723808
Cap1	257	2594	0.0779697	-0.0218027	0.0997724	0.0731174	0.725733
Ppp1r16b	257	2594	-0.0522937	0.00417206	-0.0564657	0.0748358	0.725733
Hist1h2bc	257	2594	-0.122945	0.00058936	-0.123534	0.0809468	0.740635
R3hdm4	257	2594	0.200982	-0.0229032	0.223885	0.0813309	0.740635
Stat1	257	2594	0.121384	0.012697	0.108686	0.0817007	0.740635
1600010M07Rik	257	2594	-0.0606531	0.00332258	-0.0639757	0.0929911	0.796311
Eif5a	257	2594	-0.1169	-0.0014092	-0.115491	0.0960482	0.796311
Lgals3	257	2594	-0.093725	-0.00597494	-0.08775	0.0991961	0.796311
Ctsh	257	2594	-0.075608	0.0210144	-0.0966224	0.099473	0.796311
Map3k20	257	2594	0.0810521	-0.0185849	0.099637	0.105401	0.796311
Myo6	257	2594	-0.0893549	0.0261475	-0.115502	0.105676	0.796311
Herc6	257	2594	0.0966988	0.0001016	0.0965972	0.105897	0.796311
Cd300lf	257	2594	-0.102768	-0.00140972	-0.101359	0.109233	0.796311
Isg15	257	2594	-0.0614821	0.0160554	-0.0775375	0.109256	0.796311
Ralgps2	257	2594	0.0334065	-0.0209893	0.0543958	0.11346	0.796311
Pdia3	257	2594	-0.0715158	0.0115105	-0.0830263	0.114048	0.796311
Trem3	257	2594	-0.0285161	-0.0116096	-0.0169065	0.117599	0.796311
Gbp5	257	2594	-0.0112852	0.0209622	-0.0322474	0.120526	0.796311
Nme2	257	2594	-0.137908	-0.0168182	-0.12109	0.124103	0.796311
Arpc4	257	2594	-0.112314	-0.00183497	-0.110479	0.12778	0.796311
Gm47283	257	2594	-0.070374	0.0218484	-0.0922224	0.129785	0.796311
Il13ra1	257	2594	-0.102004	-0.000115192	-0.101889	0.130601	0.796311
Rgs1	257	2594	-0.0425588	0.0375096	-0.0800684	0.135678	0.796311
Parp14	257	2594	0.0942081	-0.00317932	0.0973874	0.136079	0.796311
Hspa1a	257	2594	0.0819748	0.0153989	0.0665759	0.1363	0.796311
Gm10076	257	2594	-0.0207019	-0.0105693	-0.0101325	0.142066	0.796311
Calm1	257	2594	-0.0401062	0.0108673	-0.0509735	0.142951	0.796311
Tbxas1	257	2594	0.105868	-0.00577351	0.111641	0.149922	0.796311
Gab2	257	2594	0.0481817	-0.0248493	0.073031	0.150867	0.796311
Trim30a	257	2594	0.114862	0.0153569	0.0995049	0.151	0.796311
Cst3	257	2594	-0.0838912	0.0168439	-0.100735	0.153843	0.796311
Ldlr	257	2594	-0.0828684	0.00552584	-0.0883943	0.161089	0.796311
Ifi203	257	2594	0.0801459	-0.014982	0.0951279	0.162852	0.796311
Pdcd4	257	2594	0.0722381	-0.00811195	0.0803501	0.165002	0.796311
Ptpn1	257	2594	0.0614093	-0.0198988	0.0813081	0.166908	0.796311
Mrpl20	257	2594	-0.0600598	0.00375081	-0.0638106	0.170918	0.796311
Stat2	257	2594	0.0668346	-0.0077704	0.0746049	0.171541	0.796311
mt-Nd3	257	2594	-0.07129	0.0101711	-0.0814611	0.171615	0.796311
Ms4a6d	257	2594	-0.0307407	0.0262834	-0.057024	0.174842	0.796311
Ifi35	257	2594	-0.0329407	0.00234497	-0.0352856	0.176357	0.796311
Txn1	257	2594	0.0841682	0.000461714	0.0837064	0.176823	0.796311
Nlrp3	257	2594	-0.0762812	-0.00382184	-0.0724594	0.180119	0.796311
F630028O10Rik	257	2594	-0.0550977	0.00840011	-0.0634978	0.182132	0.796311
Gdi1	257	2594	0.0835166	-0.00123233	0.084749	0.182785	0.796311
Plin3	257	2594	-0.0582425	0.0177716	-0.0760142	0.186348	0.796311
AC149090.1	257	2594	0.0695059	0.0099725	0.0595334	0.189001	0.796311
Ly86	257	2594	0.066983	0.0217481	0.0452349	0.189993	0.796311
Tspan32	257	2594	-0.0422584	0.00395546	-0.0462138	0.190859	0.796311
Igkc	257	2594	-0.151122	0.00484577	-0.155968	0.192215	0.796311
Wars	257	2594	0.0370485	0.00234101	0.0347075	0.193547	0.796311
Iigp1	257	2594	0.105364	0.00173789	0.103626	0.194277	0.796311
Xaf1	257	2594	-0.055769	-0.00791312	-0.0478558	0.195787	0.796311
Gng11	257	2594	0.055452	0.0022433	0.0532087	0.195968	0.796311
Ifih1	257	2594	0.0673113	0.0142267	0.0530846	0.196996	0.796311
Cd274	257	2594	0.108251	-0.0104964	0.118748	0.20002	0.796311
Pml	257	2594	0.134603	0.00190104	0.132702	0.20081	0.796311
Stip1	257	2594	-0.113451	0.0071828	-0.120634	0.201568	0.796311
Cxcr4	257	2594	-0.0569606	0.0112394	-0.0681999	0.201613	0.796311
Ier2	257	2594	-0.1254	0.0166874	-0.142087	0.205981	0.796311
Trpm2	257	2594	0.112766	-0.0111484	0.123914	0.206418	0.796311
Rtp4	257	2594	0.0841077	-0.00706741	0.0911751	0.207524	0.796311
Junb	257	2594	-0.0257072	0.0232444	-0.0489515	0.207945	0.796311
Frmd4b	257	2594	0.154832	0.0156524	0.13918	0.207976	0.796311
Lpl	257	2594	0.0377575	-0.0166394	0.0543969	0.208827	0.796311
Zadh2	257	2594	-0.0278386	-0.00532582	-0.0225128	0.208986	0.796311
Lyz2	257	2594	-0.0831291	-0.00272066	-0.0804084	0.212013	0.796311
Mat2a	257	2594	0.049685	-0.00550184	0.0551868	0.212526	0.796311
Cebpa	257	2594	-0.0409864	0.00667815	-0.0476646	0.212899	0.796311
Tgm2	257	2594	0.0744213	-0.0168855	0.0913067	0.212956	0.796311
Ms4a6c	257	2594	0.0477923	0.00852991	0.0392624	0.213883	0.796311
Igfbp7	257	2594	-0.0443088	0.00782192	-0.0521307	0.222268	0.796311
Id3	257	2594	0.0615381	-0.00198928	0.0635274	0.224834	0.796311
Tmem176a	257	2594	-0.0812351	-0.00137454	-0.0798606	0.226744	0.796311
Clec4e	257	2594	-0.114073	-0.00608349	-0.107989	0.227106	0.796311
Cyp4f18	257	2594	-0.0659254	0.0096989	-0.0756243	0.227482	0.796311
Skint3	257	2594	-0.0227226	0.000296693	-0.0230193	0.227576	0.796311
Scimp	257	2594	-0.0226689	0.00525462	-0.0279235	0.227754	0.796311
Cmpk2	257	2594	-0.0327515	-0.0128539	-0.0198976	0.229269	0.796311
Mrc1	257	2594	0.0368578	0.00293544	0.0339223	0.232994	0.796311
Cd300a	257	2594	0.0884178	0.00661491	0.0818029	0.238943	0.796311
Bhlhe40	257	2594	-0.0672362	-0.0213482	-0.045888	0.241541	0.796311
Gbp3	257	2594	0.0662607	0.00700561	0.0592551	0.241946	0.796311
Pilrb2	257	2594	-0.0778063	-0.00675604	-0.0710503	0.243114	0.796311
Cybb	257	2594	0.0992852	-0.00774222	0.107027	0.243464	0.796311
Gatm	257	2594	0.0697156	-0.00970456	0.0794202	0.246593	0.796311
Actb	257	2594	-0.0636734	0.00386276	-0.0675362	0.247958	0.796311
Irf8	257	2594	-0.0779225	-0.0202876	-0.0576349	0.248172	0.796311
Clec4a2	257	2594	0.103718	-0.0228376	0.126556	0.249585	0.796311
Itgam	257	2594	-0.0726896	-0.01986	-0.0528296	0.249651	0.796311
Oas3	257	2594	0.0133335	0.0141026	-0.00076905	0.25016	0.796311
Sh2d1b1	257	2594	-0.00528445	-0.00103417	-0.00425028	0.254662	0.8045
Gm42418	257	2594	0.070308	0.00157959	0.0687284	0.267205	0.837777
Cfl1	257	2594	-0.117861	-0.011787	-0.106074	0.273945	0.848826
Itgb3	257	2594	-0.00930147	0.00868588	-0.0179873	0.2748	0.848826
Zfp366	257	2594	0.0780257	-0.00965847	0.0876842	0.282553	0.866356
2610035D17Rik	257	2594	0.076491	-0.0155533	0.0920443	0.287753	0.875862
Slamf8	257	2594	0.0794289	-0.0185621	0.0979909	0.296919	0.897212
Pira2	257	2594	0.0939245	-0.0118373	0.105762	0.299208	0.897624
Tsc22d3	257	2594	-0.0465029	0.00532794	-0.0518309	0.304945	0.904204
Hmox1	257	2594	-0.0704601	-0.00663928	-0.0638208	0.305738	0.904204
Fcer1g	257	2594	-0.0738259	0.000569474	-0.0743953	0.30992	0.910116
Cebpd	257	2594	-0.0525551	0.0127572	-0.0653123	0.313769	0.911937
Ltb4r1	257	2594	-0.0421426	-0.0106604	-0.0314822	0.314913	0.911937
Lima1	257	2594	0.00608104	-0.0259156	0.0319966	0.326519	0.91334
S100a11	257	2594	-0.0715892	0.00400461	-0.0755938	0.327765	0.91334
Cep164	257	2594	0.124098	-0.00110362	0.125202	0.332084	0.91334
Ccdc32	257	2594	0.00428318	0.00360257	0.000680603	0.332206	0.91334
F10	257	2594	-0.103628	-0.0424478	-0.0611804	0.332525	0.91334
Gas6	257	2594	0.0127759	0.00410952	0.00866638	0.332737	0.91334
Vat1	257	2594	0.00928853	-0.00924582	0.0185344	0.339134	0.91334
Klra2	257	2594	-0.033937	0.000560603	-0.0344976	0.340166	0.91334
Ly6c2	257	2594	-0.0209956	-0.00343979	-0.0175558	0.342681	0.91334
Casp4	257	2594	0.0842267	0.0277744	0.0564523	0.349158	0.91334
Plac8	257	2594	-0.0771035	-0.00501088	-0.0720926	0.349346	0.91334
Nampt	257	2594	0.0498546	-0.0117496	0.0616042	0.349763	0.91334
Fabp4	257	2594	0.043276	-0.0285579	0.0718339	0.350398	0.91334
C1qb	257	2594	-0.000982418	0.0153732	-0.0163557	0.351532	0.91334
Bcl2a1a	257	2594	0.021631	0.0219213	-0.000290331	0.352631	0.91334
Marcksl1	257	2594	0.0687636	0.00649703	0.0622665	0.353107	0.91334
Pilra	257	2594	0.0218386	-0.0113214	0.0331599	0.353108	0.91334
Nr4a1	257	2594	-0.00558746	-0.00705766	0.0014702	0.355892	0.91334
Dhx58	257	2594	0.0696536	-0.0342783	0.103932	0.358282	0.91334
Timp2	257	2594	-0.0061891	0.0172423	-0.0234314	0.36675	0.91334
Trim12c	257	2594	-0.0505084	0.0158505	-0.0663588	0.367765	0.91334
Gm15987	257	2594	-0.0175979	-0.0134341	-0.00416373	0.369761	0.91334
Cd300lb	257	2594	-0.0727419	-0.0136299	-0.0591121	0.375585	0.91334
Irf5	257	2594	-0.0645348	0.00339351	-0.0679283	0.376917	0.91334
Il1b	257	2594	-0.0281569	0.00607421	-0.0342312	0.37937	0.91334
Gm19951	257	2594	0.0304966	-0.0229418	0.0534384	0.380174	0.91334
Ifi27l2a	257	2594	-0.0203747	0.0289627	-0.0493374	0.380635	0.91334
Trim30d	257	2594	0.0137094	-0.0192782	0.0329876	0.38123	0.91334
Tuba1c	257	2594	-0.0870538	-0.00583449	-0.0812193	0.38391	0.91334
Anxa3	257	2594	0.0269871	-0.0103617	0.0373488	0.385273	0.91334
Lgals3bp	257	2594	0.0362114	-0.0127056	0.048917	0.390653	0.91334
Abhd2	257	2594	-0.00263377	0.00957207	-0.0122058	0.394389	0.91334
Ifitm2	257	2594	-0.0508997	-0.00631233	-0.0445874	0.396702	0.91334
Nostrin	257	2594	-0.0546817	-0.000361151	-0.0543206	0.397218	0.91334
Ifitm3	257	2594	-0.0351427	-0.00941061	-0.0257321	0.397545	0.91334
Lrrc25	257	2594	0.00218997	-0.0109698	0.0131598	0.397711	0.91334
Plxdc1	257	2594	0.0431599	0.00542231	0.0377376	0.401599	0.91334
Rpl10	257	2594	-0.062406	-0.000278996	-0.062127	0.402406	0.91334
Pnp	257	2594	0.0223558	-0.0273231	0.0496789	0.405821	0.91334
Fosl2	257	2594	-0.0377263	0.0294636	-0.0671898	0.409705	0.91334
Pfn1	257	2594	0.0619896	0.0113206	0.050669	0.413835	0.91334
Dusp1	257	2594	-0.00248833	-0.0215726	0.0190843	0.417109	0.91334
March1	257	2594	0.0705532	-0.0178603	0.0884135	0.422735	0.91334
Tnfsf12	257	2594	-0.00411789	0.00223235	-0.00635023	0.422739	0.91334
Socs3	257	2594	-0.0885036	0.0060602	-0.0945638	0.426003	0.91334
Mta3	257	2594	0.0651356	0.0147373	0.0503983	0.427227	0.91334
Acp5	257	2594	0.154886	0.0259346	0.128951	0.429865	0.91334
Xdh	257	2594	0.0335042	-0.00217029	0.0356745	0.429906	0.91334
Fos	257	2594	-0.0373203	-0.0122271	-0.0250933	0.433674	0.91334
Dnaja1	257	2594	0.0507108	0.00427603	0.0464347	0.434786	0.91334
Slc40a1	257	2594	-0.00611924	0.000676206	-0.00679544	0.43574	0.91334
Odc1	257	2594	-0.0733638	-0.0211015	-0.0522623	0.440016	0.91334
Parp9	257	2594	0.0244869	0.021696	0.00279086	0.441382	0.91334
Ltb	257	2594	-0.00150353	0.0248228	-0.0263264	0.442262	0.91334
Ccnd2	257	2594	0.0197356	0.00173418	0.0180015	0.443905	0.91334
Btg2	257	2594	-0.0365629	0.00315292	-0.0397159	0.447016	0.91334
Gbp4	257	2594	0.109759	0.00732971	0.102429	0.456796	0.91334
Napsa	257	2594	-0.058038	-0.0189129	-0.0391251	0.459365	0.91334
Hhex	257	2594	-0.0535919	-0.0182995	-0.0352924	0.460609	0.91334
Ifit2	257	2594	0.0669962	-0.00579988	0.0727961	0.461114	0.91334
Pltp	257	2594	0.0404585	0.0159244	0.0245341	0.462972	0.91334
Mmp14	257	2594	-0.0624905	-0.00344298	-0.0590475	0.463455	0.91334
Cd300ld	257	2594	-0.0207083	0.00451667	-0.025225	0.464493	0.91334
H2-Ab1	257	2594	0.0702445	0.0216285	0.0486159	0.465322	0.91334
Pkib	257	2594	0.0750996	-0.00468078	0.0797804	0.465481	0.91334
Tubb4b	257	2594	0.00677991	-0.00227966	0.00905957	0.467281	0.91334
Klf6	257	2594	0.031448	0.00952581	0.0219221	0.470645	0.91334
Rhob	257	2594	0.0191423	-0.000128563	0.0192709	0.475511	0.91334
Tyrobp	257	2594	-0.0647489	0.0116536	-0.0764025	0.476233	0.91334
Lmo2	257	2594	0.0287548	-0.0185431	0.0472978	0.476965	0.91334
Trf	257	2594	-0.0375708	0.0133966	-0.0509674	0.478572	0.91334
Ehd4	257	2594	-0.0488019	-0.0026174	-0.0461845	0.481459	0.91334
Samhd1	257	2594	0.0155514	-0.0265961	0.0421475	0.488001	0.91334
Mcemp1	257	2594	0.0529599	-0.0176948	0.0706547	0.488428	0.91334
Mxd4	257	2594	-0.0733451	0.00050354	-0.0738486	0.489648	0.91334
Ube2l6	257	2594	-0.0575303	-0.00252698	-0.0550033	0.489975	0.91334
Fbrsl1	257	2594	0.0627648	-0.00714125	0.069906	0.491249	0.91334
Mt1	257	2594	0.0284256	-0.00646509	0.0348907	0.497203	0.91334
Bst2	257	2594	-0.00800352	0.00521413	-0.0132176	0.498384	0.91334
Cacybp	257	2594	0.0412934	-0.00240795	0.0437013	0.500082	0.91334
Actg1	257	2594	-0.0843156	-0.00621093	-0.0781046	0.500825	0.91334
Il21r	257	2594	0.00469057	0.00980764	-0.00511707	0.502434	0.91334
Cttnbp2nl	257	2594	-0.0417578	0.0189384	-0.0606963	0.502822	0.91334
Themis2	257	2594	0.0964409	0.00625789	0.090183	0.506003	0.91334
Sash1	257	2594	0.0238633	0.0137395	0.0101238	0.507296	0.91334
Igtp	257	2594	0.0560383	-0.00348693	0.0595252	0.508368	0.91334
Ace	257	2594	-0.0641467	-0.0113074	-0.0528393	0.512069	0.91334
Usp25	257	2594	-0.0310716	0.0161541	-0.0472256	0.512393	0.91334
Fcgr3	257	2594	0.0960381	0.0165729	0.0794652	0.51384	0.91334
Ppp1r15a	257	2594	-0.0637296	-0.00678282	-0.0569468	0.52075	0.91334
Irf7	257	2594	0.0131418	-0.011623	0.0247648	0.520785	0.91334
Cd38	257	2594	0.0637957	6.81822e-05	0.0637275	0.521959	0.91334
C1qa	257	2594	0.03445	0.000570634	0.0338794	0.523348	0.91334
Arl6ip5	257	2594	-0.0148725	0.0249077	-0.0397802	0.523725	0.91334
Slc11a1	257	2594	-0.0828474	-0.019118	-0.0637294	0.527305	0.91334
Zbp1	257	2594	-0.020335	0.00101513	-0.0213501	0.530839	0.91334
Mgst1	257	2594	-0.0378585	0.00367814	-0.0415366	0.531013	0.91334
Itga4	257	2594	0.0511402	-0.0171288	0.068269	0.532326	0.91334
Bcl3	257	2594	-0.0842122	0.0148871	-0.0990993	0.536503	0.91334
Lyn	257	2594	-0.00588959	-0.0167633	0.0108737	0.536536	0.91334
Fgr	257	2594	0.046998	-0.0277137	0.0747117	0.53868	0.91334
Spi1	257	2594	-0.00386587	-0.00371384	-0.000152031	0.538805	0.91334
Cdkn1a	257	2594	-0.0295509	-0.0104352	-0.0191157	0.541672	0.913574
Dtx3l	257	2594	0.0422604	-0.00375818	0.0460186	0.545398	0.913574
Serpina3g	257	2594	0.0956297	0.0044487	0.091181	0.555207	0.913574
Upp1	257	2594	-0.0944763	-0.0426994	-0.0517769	0.555445	0.913574
AY036118	257	2594	-0.0403729	-0.00825944	-0.0321134	0.557484	0.913574
Igf1	257	2594	0.0558844	-0.00806881	0.0639532	0.558227	0.913574
Rnaset2b	257	2594	0.0239026	-0.00720312	0.0311057	0.561384	0.913574
Dram1	257	2594	-0.00810059	-0.0146578	0.00655721	0.562592	0.913574
Ifi207	257	2594	-0.0511189	-0.0186664	-0.0324525	0.562652	0.913574
2310011J03Rik	257	2594	0.045887	0.00195804	0.043929	0.563306	0.913574
Sik1	257	2594	-0.000458881	-0.0178962	0.0174373	0.563704	0.913574
Oasl2	257	2594	-0.0148279	-0.0124956	-0.00233228	0.566888	0.913574
Hp	257	2594	-0.0128085	-0.0225257	0.00971722	0.567423	0.913574
Ctnnd1	257	2594	0.0339891	0.00577842	0.0282107	0.578587	0.926214
Rnf213	257	2594	0.062569	0.02439	0.0381791	0.583538	0.926214
Il18bp	257	2594	0.069766	-0.0105152	0.0802812	0.585839	0.926214
Rgl1	257	2594	0.0401161	0.00820362	0.0319125	0.587488	0.926214
Ncl	257	2594	-0.0313801	-0.00424186	-0.0271383	0.589821	0.926214
C1qc	257	2594	-0.0130559	0.0113448	-0.0244007	0.589942	0.926214
Ifi205	257	2594	0.0793408	0.0225393	0.0568015	0.595786	0.926214
Arl5c	257	2594	0.00072523	-0.0118036	0.0125289	0.596201	0.926214
Ccnd3	257	2594	-0.063815	-0.0102081	-0.053607	0.601722	0.926214
Gltp	257	2594	0.0562839	-0.00539142	0.0616753	0.602011	0.926214
Klf4	257	2594	-0.0948362	0.00731229	-0.102148	0.60429	0.926214
Phf11b	257	2594	-0.0673137	-0.0110825	-0.0562312	0.60617	0.926214
Ifi211	257	2594	0.0416638	-0.00829885	0.0499627	0.616463	0.926214
Pla2g7	257	2594	-0.0271838	0.00554486	-0.0327287	0.617427	0.926214
Irf1	257	2594	-0.0328498	0.0112755	-0.0441253	0.617656	0.926214
Ccnd1	257	2594	-0.0124238	-0.0372477	0.0248239	0.61849	0.926214
Pak1	257	2594	0.053838	-0.000921763	0.0547598	0.619665	0.926214
Hist1h1e	257	2594	-0.113806	0.00401888	-0.117825	0.622684	0.926214
Igsf6	257	2594	0.00413353	0.00517718	-0.00104365	0.624502	0.926214
Erh	257	2594	0.0542667	-0.0189852	0.0732519	0.625755	0.926214
Cd302	257	2594	0.0148106	-0.0155339	0.0303445	0.630366	0.926214
Fcgr4	257	2594	0.0835737	0.0170261	0.0665476	0.632861	0.926214
Hist1h1c	257	2594	-0.0634017	-0.00811819	-0.0552835	0.63497	0.926214
Sirpb1c	257	2594	0.0541664	-0.0155666	0.0697331	0.636994	0.926214
Il10ra	257	2594	0.0615712	0.0168191	0.0447521	0.637184	0.926214
Rpl27	257	2594	-0.0102742	0.00458248	-0.0148567	0.639363	0.926214
Gngt2	257	2594	-0.0506704	-0.0276394	-0.023031	0.640173	0.926214
Parp12	257	2594	0.0324277	0.00928363	0.0231441	0.642707	0.926214
Siglece	257	2594	0.0852846	-0.0116308	0.0969154	0.644918	0.926214
Ly6i	257	2594	0.00476883	-0.0132941	0.0180629	0.645424	0.926214
Cmtm3	257	2594	0.0227562	-0.0169833	0.0397396	0.646298	0.926214
H2-T23	257	2594	0.0417851	0.00967338	0.0321118	0.646351	0.926214
Gbp2	257	2594	-0.0224724	-0.000164379	-0.022308	0.659153	0.93367
Csf2rb	257	2594	-0.0601349	-0.0154388	-0.0446961	0.659203	0.93367
Ifi209	257	2594	0.0187445	-0.00701015	0.0257547	0.66132	0.93367
Jun	257	2594	0.0334146	0.0327786	0.000636078	0.672846	0.93367
Gm2a	257	2594	-0.0163212	-0.00404741	-0.0122738	0.674254	0.93367
Ccl6	257	2594	-0.0589605	-0.0222288	-0.0367317	0.675051	0.93367
Alyref	257	2594	-0.076512	-0.00322564	-0.0732864	0.677124	0.93367
Stx11	257	2594	-0.0340756	-0.0276826	-0.00639292	0.67812	0.93367
Arhgap15	257	2594	0.0444952	-0.0069705	0.0514657	0.679045	0.93367
Trib1	257	2594	-0.0895157	0.000428843	-0.0899445	0.679388	0.93367
Bank1	257	2594	-0.00176423	-0.0144864	0.0127222	0.682204	0.93367
Fcgr1	257	2594	-0.0256504	-0.0270027	0.00135231	0.684329	0.93367
Ccr5	257	2594	0.0483763	0.0312229	0.0171535	0.686316	0.93367
Cd80	257	2594	-0.058139	-0.000947035	-0.0571919	0.686988	0.93367
Clic4	257	2594	0.00721986	0.02883	-0.0216102	0.687203	0.93367
Irgm2	257	2594	-0.00883472	0.00204963	-0.0108843	0.687379	0.93367
Slfn8	257	2594	-0.0320061	-0.00613061	-0.0258755	0.695732	0.936724
Fpr2	257	2594	0.0727729	-0.0122527	0.0850256	0.701926	0.936724
Slfn5	257	2594	0.0267426	-0.00250301	0.0292456	0.704437	0.936724
Rgs2	257	2594	-0.0478081	-0.022117	-0.0256911	0.70473	0.936724
Nxpe4	257	2594	0.0163032	0.0158121	0.000491042	0.705199	0.936724
Rasgrp3	257	2594	-0.0290798	-0.0122666	-0.0168133	0.705229	0.936724
Cebpb	257	2594	-0.0201346	-0.00792117	-0.0122134	0.705351	0.936724
Tnfaip3	257	2594	0.00139746	0.0443632	-0.0429658	0.714602	0.943574
Ptgs1	257	2594	-0.0410261	0.00184033	-0.0428664	0.715035	0.943574
Clec4a1	257	2594	0.0375232	-0.0095378	0.047061	0.720095	0.947254
Ifit3	257	2594	-0.00239695	-0.00954648	0.00714953	0.723073	0.948181
Dnajb4	257	2594	-0.0857866	-0.00884951	-0.0769371	0.731563	0.956306
Fabp5	257	2594	0.00847516	0.00857162	-9.64543e-05	0.735168	0.958015
Tmem106a	257	2594	-0.0226135	0.00587534	-0.0284889	0.737783	0.958428
Rps29	257	2594	-0.00265819	0.00890043	-0.0115586	0.746663	0.958431
Msr1	257	2594	0.0410265	0.00381003	0.0372165	0.748275	0.958431
Hyou1	257	2594	0.043744	0.00549496	0.0382491	0.748713	0.958431
Tgfbi	257	2594	-0.0489418	0.00268606	-0.0516279	0.748753	0.958431
Gm5150	257	2594	-0.0550439	-0.0223751	-0.0326688	0.749277	0.958431
Creg1	257	2594	-0.0122814	0.0202027	-0.0324841	0.752076	0.959069
Malat1	257	2594	0.048647	0.018575	0.030072	0.755498	0.959584
Ifi44	257	2594	0.100555	-0.0114857	0.112041	0.76141	0.959584
Cdkn1b	257	2594	0.0137384	0.0129367	0.000801714	0.762636	0.959584
Vcam1	257	2594	0.0375771	-0.0097128	0.0472899	0.765197	0.959584
Batf3	257	2594	0.0198318	0.00547803	0.0143538	0.766459	0.959584
Plbd1	257	2594	-0.032355	-0.00646354	-0.0258915	0.76778	0.959584
Tmsb4x	257	2594	-0.0527106	-0.000577811	-0.0521328	0.768587	0.959584
Ms4a4c	257	2594	0.0423856	-0.00187794	0.0442635	0.775112	0.962971
Stab2	257	2594	-0.0163936	0.00522876	-0.0216224	0.778041	0.962971
Psap	257	2594	-0.0099843	-0.00222492	-0.00775938	0.778229	0.962971
Jdp2	257	2594	0.0169152	-0.00516348	0.0220787	0.786114	0.96985
Hspa8	257	2594	0.0583154	0.0177063	0.0406091	0.795305	0.973405
Map3k8	257	2594	0.00434679	0.00664811	-0.00230132	0.79712	0.973405
Uba52	257	2594	0.0373922	0.0299401	0.00745209	0.802523	0.973405
Cdc42ep3	257	2594	-0.0324917	0.00164669	-0.0341383	0.802667	0.973405
Dynll1	257	2594	0.0220374	-0.0205149	0.0425523	0.803486	0.973405
Ifi206	257	2594	0.119373	-0.00999227	0.129365	0.806849	0.973405
Plcg2	257	2594	0.0321069	0.0202406	0.0118664	0.8089	0.973405
Ubl7	257	2594	-0.0365625	-0.00209974	-0.0344628	0.809883	0.973405
Gpr35	257	2594	0.110122	0.0106361	0.099486	0.810544	0.973405
Mlkl	257	2594	0.0359755	-0.00440931	0.0403848	0.812338	0.973405
Cpt1a	257	2594	0.00969827	0.0105316	-0.000833345	0.817527	0.97506
Litaf	257	2594	-0.0194628	0.00149561	-0.0209584	0.819553	0.97506
Irgm1	257	2594	-0.0427093	0.004855	-0.0475643	0.821625	0.97506
Baz2b	257	2594	-0.00698725	-0.0038461	-0.00314115	0.823073	0.97506
Slc17a5	257	2594	-0.064254	-0.00887496	-0.055379	0.828651	0.976202
Serpina3f	257	2594	-0.0397367	-0.0215599	-0.0181769	0.830244	0.976202
Clec4n	257	2594	0.0125561	0.00618204	0.00637408	0.831059	0.976202
Pim1	257	2594	-0.0543181	0.00864188	-0.06296	0.841938	0.985365
Ifi204	257	2594	0.0248907	0.018397	0.00649372	0.843586	0.985365
Itgb1	257	2594	-0.0319562	-0.0255713	-0.00638491	0.849336	0.985507
Vim	257	2594	-0.0283838	-0.0145156	-0.0138682	0.849365	0.985507
Cxcl9	257	2594	0.0252049	-0.0184333	0.0436382	0.854644	0.985507
Wfdc17	257	2594	-0.000861921	0.00564105	-0.00650297	0.858008	0.985507
Fcgr2b	257	2594	0.00403825	0.00979255	-0.0057543	0.858641	0.985507
Chmp4b	257	2594	-0.0219223	-0.0115917	-0.0103307	0.862779	0.985507
Anxa2	257	2594	-0.00927507	-0.0265787	0.0173036	0.863217	0.985507
Dusp3	257	2594	-0.0134796	-0.0150187	0.00153903	0.866031	0.985507
Tubb6	257	2594	0.0308082	-0.0146113	0.0454195	0.867149	0.985507
Rsrp1	257	2594	-0.00092689	0.00362936	-0.00455625	0.869142	0.985507
Gm4951	257	2594	0.0254046	0.015617	0.00978758	0.870711	0.985507
Phf11d	257	2594	0.00586453	0.00752555	-0.00166102	0.873173	0.985507
Plek	257	2594	0.0207831	0.00586692	0.0149162	0.87784	0.985507
Sdhd	257	2594	0.00956403	0.00753274	0.00203128	0.881542	0.985507
Arpc2	257	2594	0.0293477	0.00166272	0.027685	0.882663	0.985507
Helz2	257	2594	-0.00893144	0.0218788	-0.0308102	0.885093	0.985507
Metrnl	257	2594	0.00700337	-0.00977949	0.0167829	0.885432	0.985507
Ly6a	257	2594	0.0309918	0.0159231	0.0150688	0.886247	0.985507
S100a4	257	2594	-0.0568135	-0.0131925	-0.043621	0.890049	0.986519
Ddit4	257	2594	0.0127439	-0.00469498	0.0174389	0.897779	0.986519
Cotl1	257	2594	-0.0313954	-0.0199599	-0.0114355	0.899602	0.986519
Dab2	257	2594	0.0108007	-0.00996918	0.0207698	0.89988	0.986519
Eif2ak2	257	2594	-0.0106073	-0.0100637	-0.000543545	0.900279	0.986519
Dok3	257	2594	0.0179916	0.0109259	0.00706569	0.902971	0.986519
Ephx1	257	2594	0.0539693	0.00300109	0.0509682	0.904623	0.986519
Mafb	257	2594	-0.0444533	-0.0231804	-0.0212729	0.906083	0.986519
Slc15a3	257	2594	-0.0165404	-0.00826033	-0.00828011	0.912653	0.988512
Klf2	257	2594	-0.0366868	-0.029657	-0.00702979	0.9209	0.988512
Actn1	257	2594	0.00795428	0.00557033	0.00238394	0.921673	0.988512
Gbp7	257	2594	0.0584978	0.0252681	0.0332296	0.922978	0.988512
Arpp19	257	2594	0.0127075	-0.000762598	0.0134701	0.925203	0.988512
Lrp1	257	2594	-0.0407097	-0.0201685	-0.0205412	0.92623	0.988512
6430548M08Rik	257	2594	0.0102244	0.00158012	0.00864428	0.926891	0.988512
Mef2c	257	2594	-0.013593	-0.00259063	-0.0110024	0.927677	0.988512
Utp23	257	2594	-0.0545725	-0.0153046	-0.0392678	0.929741	0.988512
Mir142hg	257	2594	0.0357197	0.00197656	0.0337432	0.932084	0.988512
Lpcat2	257	2594	-0.0393447	-0.0233026	-0.0160422	0.942249	0.988512
Zfp36	257	2594	0.0167079	0.0077199	0.00898797	0.947025	0.988512
Hacd4	257	2594	0.0481208	-0.0128478	0.0609687	0.947497	0.988512
Ifi213	257	2594	0.0367033	0.00682076	0.0298825	0.950669	0.988512
Hspa5	257	2594	-0.0143459	0.0182537	-0.0325997	0.95723	0.988512
Lars2	257	2594	0.041889	0.0192533	0.0226358	0.957424	0.988512
Pilrb1	257	2594	0.0364444	0.00621561	0.0302287	0.957533	0.988512
Ide	257	2594	0.0427094	0.0264847	0.0162248	0.957919	0.988512
Serpinb9	257	2594	-0.00731346	0.0309336	-0.0382471	0.959343	0.988512
Tbc1d4	257	2594	-0.0198915	0.00785971	-0.0277512	0.960905	0.988512
Rsad2	257	2594	-0.0430372	0.000600422	-0.0436376	0.96104	0.988512
Ppfia4	257	2594	-0.0506225	-0.0173031	-0.0333194	0.962922	0.988512
Cd74	257	2594	0.0207026	0.00951869	0.011184	0.96428	0.988512
Efhd2	257	2594	0.00386794	-0.0185589	0.0224269	0.964807	0.988512
Trim25	257	2594	0.0146235	0.0170185	-0.00239502	0.969699	0.990036
Ccdc88a	257	2594	-0.044968	-0.0244625	-0.0205055	0.971043	0.990036
Mertk	257	2594	0.0467139	0.0216279	0.025086	0.976617	0.99329
Eif4ebp1	257	2594	0.0289697	0.00904805	0.0199216	0.985443	0.995514
Gda	257	2594	0.00215871	-0.0365035	0.0386622	0.988212	0.995514
Nars	257	2594	-0.0290864	-0.0212178	-0.00786868	0.989116	0.995514
Kcnk6	257	2594	-0.038078	0.0130738	-0.0511518	0.989596	0.995514
Pstpip2	257	2594	0.0171181	-0.0151928	0.0323109	0.990874	0.995514
Igfbp4	257	2594	0.0306225	0.000720125	0.0299023	0.993127	0.995514
Pirb	257	2594	0.0315265	-0.00310244	0.034629	0.997341	0.997341

## Sheet: focal_cells_IFNg_zscore
cell_barcode	ct2	ct2_merged	well_key	byst	raw_IFNγ	z_IFNγ
AAACCAAAGGGTAGTG-0	DC	DC	880_34_26	NTC	1.32282	-0.204804
AAACCAAAGTTGCTTC-0	Kupffer	Kupffer+MonoMac+Endothelial	880_44_42	NTC	2.91214	-0.381712
AAACCATTCCTCAGCC-0	NK	NK	880_67_24	NTC	1.88992	1.33842
AAACCATTCGTGAACC-0	NK	NK	880_58_22	unassigned	1.06107	0.19639
AAACCCGCATGACTCC-0	B cell	B cell	880_17_69	unassigned	1.10887	0.41194
AAACCCTGTGACTCGC-0	Endothelial	Kupffer+MonoMac+Endothelial	880_35_18	NTC	3.93983	0.909154
AAACCCTGTTTACTAG-0	DC	DC	880_24_42	unassigned	1.73005	0.174966
AAACCCTGTTTGGCAT-0	DC	DC	880_12_18	NTC	1.78752	0.228563
AAACCGCTCACCCTGC-0	Endothelial	Kupffer+MonoMac+Endothelial	880_60_5	unassigned	0.690873	-1.52676
AAACCGCTCCCTGTGC-0	Mono/Mac	Kupffer+MonoMac+Endothelial	880_18_17	NTC	2.30423	0.513033
AAACGACAGCCAGAGA-0	Kupffer	Kupffer+MonoMac+Endothelial	880_32_73	unassigned	2.78968	-0.457493
AAACGATGTAACGGGT-0	Mono/Mac	Kupffer+MonoMac+Endothelial	880_42_33	Ifng	2.09779	0.33544
AAACGATGTTTGATTG-0	CD8 T	CD8 T	880_51_70	unassigned	-0.175451	-0.909526
AAACGCCTCCCGCATC-0	Mono/Mac	Kupffer+MonoMac+Endothelial	880_35_33	unassigned	2.63453	0.797181
AAACGTCCAACCCTAC-0	DC	DC	880_65_51	NTC	0.0810537	-1.36285
AAACGTCCATCGGTAG-0	Endothelial	Kupffer+MonoMac+Endothelial	880_62_44	unassigned	3.50203	0.580912
AAACGTCCATGAGCCA-0	DC	DC	880_68_51	Ifng	0.499883	-0.972258
AAACTCACACATAGGT-0	Kupffer	Kupffer+MonoMac+Endothelial	880_26_65	unassigned	3.43791	-0.0563538
AAACTCACAGGTTCAG-0	Endothelial	Kupffer+MonoMac+Endothelial	880_62_19	unassigned	0.594744	-1.59883
AAACTCCGTATGGGAC-0	Kupffer	Kupffer+MonoMac+Endothelial	880_45_40	NTC	1.44073	-1.29225
AAACTCCGTGGCCTAC-0	CD4 T	CD4 T	880_39_17	NTC	0.150991	-0.56074
AAACTTGCATCCATGC-0	Endothelial	Kupffer+MonoMac+Endothelial	880_55_53	unassigned	4.2344	1.13001
AAAGCATGTGATGAAT-0	Mono/Mac	Kupffer+MonoMac+Endothelial	880_57_18	NTC	0.449629	-1.08243
AAAGCATGTTAGCCAT-0	Mono/Mac	Kupffer+MonoMac+Endothelial	880_25_19	NTC	1.45253	-0.219659
AAAGCCAGTAATCGGA-0	CD8 T	CD8 T	880_37_17	unassigned	0.594471	-0.0380939
AAAGCCAGTAGGCTGG-0	Mono/Mac	Kupffer+MonoMac+Endothelial	880_67_37	Ifng	1.05491	-0.561723
AAAGCTAAGGGTGACA-0	Mono/Mac	Kupffer+MonoMac+Endothelial	880_29_50	NTC	2.84365	0.977079
AAAGGTCAGGTACAGG-0	CD8 T	CD8 T	880_42_50	NTC	0.0387395	-0.667096
AAAGGTCAGTCATCCT-0	Kupffer	Kupffer+MonoMac+Endothelial	880_1_61	unassigned	2.80933	-0.445333
AAAGGTTGTGAGTCGG-0	Mono/Mac	Kupffer+MonoMac+Endothelial	880_49_27	NTC	1.22324	-0.416911
AAAGTAGTCTCATCGT-0	CD8 T	CD8 T	880_37_8	unassigned	0.353001	-0.3114
AAAGTGATCGACTCAA-0	Mono/Mac	Kupffer+MonoMac+Endothelial	880_0_65	unassigned	1.90452	0.169176
AAAGTTGAGCATCACA-0	Endothelial	Kupffer+MonoMac+Endothelial	880_51_39	unassigned	-0.170246	-2.17238
AAAGTTGAGGCACTGT-0	NKT	NKT	880_19_74	NTC	0.931713	0.852617
AAATGAGTCATGGCAC-0	Neutrophil	Neutrophil	880_49_52	NTC	0.990557	-1.03332
AAATGCAAGGCATGTC-0	Endothelial	Kupffer+MonoMac+Endothelial	880_49_59	NTC	2.76938	0.0316059
AAATGCTTCGCTCAGG-0	DC	DC	880_36_53	NTC	1.83297	0.270945
AAATGGATCCGGGTCA-0	Mono/Mac	Kupffer+MonoMac+Endothelial	880_7_72	NTC	-0.433518	-1.84217
AAATGGGCAGCCTAGA-0	Treg	Treg	880_18_40	unassigned	0.905057	0.00860387
AAATGTGAGCCATCGG-0	Endothelial	Kupffer+MonoMac+Endothelial	880_37_24	NTC	3.56879	0.630965
AAATTCGCAAGTCGCA-0	Endothelial	Kupffer+MonoMac+Endothelial	880_29_65	NTC	1.56009	-0.87506
AAATTCGCAATGGAAG-0	Kupffer	Kupffer+MonoMac+Endothelial	880_64_26	NTC	5.30559	1.0994
AAATTGCTCATGACTG-0	Kupffer	Kupffer+MonoMac+Endothelial	880_76_36	Ifng	1.92188	-0.994506
AACACCGCAGGACTAT-0	Endothelial	Kupffer+MonoMac+Endothelial	880_30_14	unassigned	2.13137	-0.446737
AACACCTGTGAGCGCA-0	Mono/Mac	Kupffer+MonoMac+Endothelial	880_4_57	NTC	2.67481	0.83183
AACACGAGTTGAGCGG-0	Mono/Mac	Kupffer+MonoMac+Endothelial	880_76_23	NTC	1.24937	-0.394431
AACACTTAGCTATGCA-0	Treg	Treg	880_54_54	NTC	-1.04924	-1.9045
AACACTTAGGCGTCTG-0	CD8 T	CD8 T	880_43_52	NTC	-0.54359	-1.3262
AACAGCTCAAGCGGAG-0	B cell	B cell	880_64_47	unassigned	0.501257	-0.244675
AACAGCTCATAATTCC-0	NKT	NKT	880_32_28	unassigned	0.417686	-0.0467429
AACAGCTCATGCTTGC-0	Endothelial	Kupffer+MonoMac+Endothelial	880_37_50	unassigned	3.09466	0.275488
AACAGTAAGTGGGTAG-0	Mono/Mac	Kupffer+MonoMac+Endothelial	880_30_14	unassigned	1.57922	-0.110676
AACATAGAGTAAGTAG-0	CD8 T	CD8 T	880_74_37	NTC	1.03864	0.46464
AACATCACATTCCTCT-0	Endothelial	Kupffer+MonoMac+Endothelial	880_23_18	NTC	4.28623	1.16887
AACATTCAGGCAAGCA-0	Cholangiocyte	Cholangiocyte	880_46_70	NTC	1.4572
AACATTGCACCTGTAC-0	DC	DC	880_54_57	NTC	2.11404	0.533063
AACCAACCATCGCTAC-0	B cell	B cell	880_77_41	unassigned	0.839536	0.120884
AACCAAGGTCCATTAA-0	Kupffer	Kupffer+MonoMac+Endothelial	880_55_38	NTC	3.29036	-0.147659
AACCAGCTCGACCTAA-0	Kupffer	Kupffer+MonoMac+Endothelial	880_45_49	NTC	7.0539	2.1813
AACCATTAGGTACGTC-0	Kupffer	Kupffer+MonoMac+Endothelial	880_35_30	NTC	2.82525	-0.435477
AACCCAATCCCTGTAT-0	Mono/Mac	Kupffer+MonoMac+Endothelial	880_56_53	unassigned	0.703423	-0.864095
AACCCAATCTATCACC-0	B cell	B cell	880_32_78	NTC	0.27116	-0.493328
AACCCACAGGATCTCA-0	Mono/Mac	Kupffer+MonoMac+Endothelial	880_53_47	NTC	0.0769051	-1.40307
AACCCAGCATGAGTTA-0	CD8 T	CD8 T	880_66_18	unassigned	-0.286625	-1.03536
AACCCTAAGCCTAGAC-0	pDC	pDC	880_24_74	unassigned	0.827959	0.438391
AACCCTAAGGTCCCGA-0	DC	DC	880_53_57	NTC	1.32237	-0.20523
AACCGATCATAGGTTA-0	Endothelial	Kupffer+MonoMac+Endothelial	880_47_22	NTC	5.38094	1.98963
AACCGGGGTCAACCAT-0	Mono/Mac	Kupffer+MonoMac+Endothelial	880_68_50	Ifng	2.35465	0.556402
AACCTGATCAGCACGT-0	Neutrophil	Neutrophil	880_34_44	NTC	3.8684	0.925151
AACCTGATCCGCCAAG-0	Kupffer	Kupffer+MonoMac+Endothelial	880_51_46	unassigned	3.85541	0.202004
AACCTTGAGCCAGCAT-0	Endothelial	Kupffer+MonoMac+Endothelial	880_42_14	NTC	2.68829	-0.0291912
AACCTTGAGGCATGTC-0	Endothelial	Kupffer+MonoMac+Endothelial	880_79_32	unassigned	3.69909	0.728664
AACGAACAGATAGGTA-0	CD8 T	CD8 T	880_56_50	NTC	0.39436	-0.264589
AACGAATGTAATCGTC-0	Endothelial	Kupffer+MonoMac+Endothelial	880_48_19	unassigned	3.61588	0.666273
AACGAATGTGATCCGC-0	Endothelial	Kupffer+MonoMac+Endothelial	880_35_59	NTC	3.00542	0.208578
AACGAATGTGATGCAA-0	Mono/Mac	Kupffer+MonoMac+Endothelial	880_40_16	unassigned	-0.330929	-1.75392
AACGAATGTTGCGATT-0	Neutrophil	Neutrophil	880_8_52	unassigned	1.30055	-0.822359
AACGACTCACCTTCAA-0	Treg	Treg	880_68_30	unassigned	-1.12456	-1.97822
AACGATCCAGCTACGA-0	Endothelial	Kupffer+MonoMac+Endothelial	880_53_44	unassigned	-0.150961	-2.15793
AACGATCCAGGAACGG-0	Endothelial	Kupffer+MonoMac+Endothelial	880_55_52	NTC	1.85497	-0.653973
AACGATGGTAAGCGAC-0	DC	DC	880_68_20	unassigned	1.30458	-0.221815
AACGATGGTTAATTCG-0	Cholangiocyte	Cholangiocyte	880_66_32	NTC	2.24365
AACGCAAGTTAGCAGA-0	DC	DC	880_30_21	NTC	1.18833	-0.330229
AACGCCACAACCTGAG-0	DC	DC	880_42_13	NTC	2.97897	1.33968
AACGCCACACATGCCT-0	CD8 T	CD8 T	880_43_56	NTC	-0.851747	-1.67499
AACGCCACACTAATCT-0	Kupffer	Kupffer+MonoMac+Endothelial	880_21_50	Ifng	3.11215	-0.257937
AACGCCACATCGGCTT-0	Endothelial	Kupffer+MonoMac+Endothelial	880_27_22	NTC	3.45505	0.54569
AACGCCCGTTGCAGTT-0	Kupffer	Kupffer+MonoMac+Endothelial	880_0_20	unassigned	2.3433	-0.733722
AACGCGAAGATAGTAG-0	Mono/Mac	Kupffer+MonoMac+Endothelial	880_65_23	unassigned	2.71845	0.86937
AACGCGCCACTCATCA-0	Treg	Treg	880_3_79	unassigned	0.598707	-0.291289
AACGCTATCCTCACCA-0	Kupffer	Kupffer+MonoMac+Endothelial	880_54_32	unassigned	2.65912	-0.538281
AACGCTCAGAAGCAAC-0	Endothelial	Kupffer+MonoMac+Endothelial	880_77_46	unassigned	2.46683	-0.19523
AACGCTCAGCCTAGAC-0	Neutrophil	Neutrophil	880_78_41	unassigned	6.58753	2.77561
AACGCTTGTCTGGTCA-0	Endothelial	Kupffer+MonoMac+Endothelial	880_4_51	Ifng	3.11432	0.290229
AACGCTTGTGAGGCCA-0	Hepatocyte	Hepatocyte	880_15_49	NTC	3.05754	0.689108
AACGGATAGCGAACTC-0	B cell	B cell	880_32_53	NTC	2.06233	1.44229
AACGGATAGGAGGATT-0	Endothelial	Kupffer+MonoMac+Endothelial	880_45_34	Ifng	2.23479	-0.369199
AACGGATAGTAAGTTC-0	DC	DC	880_50_16	NTC	0.548214	-0.927185
AACGGCGGTGGCTAGG-0	Mono/Mac	Kupffer+MonoMac+Endothelial	880_38_30	unassigned	2.35341	0.555343
AACGGTAGTCTCAGCA-0	Treg	Treg	880_37_24	NTC	-0.190798	-1.06415
AACGGTAGTTAGTGAG-0	Kupffer	Kupffer+MonoMac+Endothelial	880_36_72	Ifng	3.23569	-0.181491
AACGGTAGTTTGGTGT-0	B cell	B cell	880_47_20	unassigned	0.862615	0.145823
AACGGTGAGGAATGTA-0	Endothelial	Kupffer+MonoMac+Endothelial	880_53_54	NTC	-0.104586	-2.12316
AACGGTGAGGATGATA-0	Kupffer	Kupffer+MonoMac+Endothelial	880_45_39	NTC	1.41523	-1.30803
AACGGTGAGTGACCTA-0	DC	DC	880_48_14	unassigned	1.47542	-0.062493
AACGTAAAGCGAGACA-0	Endothelial	Kupffer+MonoMac+Endothelial	880_55_54	NTC	1.9811	-0.559403
AACGTAGGTTAGTCCG-0	Mono/Mac	Kupffer+MonoMac+Endothelial	880_46_59	unassigned	1.98858	0.241488
AACGTAGGTTCGCGTA-0	Treg	Treg	880_46_59	unassigned	1.13832	0.23695
AACTCAACATCCGTCG-0	Kupffer	Kupffer+MonoMac+Endothelial	880_9_78	unassigned	1.91833	-0.996701
AACTCGATCGTGACTA-0	DC	DC	880_5_77	unassigned	0.601265	-0.877711
AACTCGATCGTTCCGC-0	Neutrophil	Neutrophil	880_38_22	NTC	1.10423	-0.955963
AACTGAAAGCGACTTA-0	B cell	B cell	880_73_27	NTC	0.427963	-0.323879
AACTGACCAAGGGATA-0	Kupffer	Kupffer+MonoMac+Endothelial	880_47_20	unassigned	1.91339	-0.999756
AACTGACCACATGCCT-0	CD8 T	CD8 T	880_56_21	unassigned	0.735885	0.121964
AACTGAGGTAGCGGAT-0	Kupffer	Kupffer+MonoMac+Endothelial	880_55_39	NTC	1.4693	-1.27457
AACTGAGGTTAGGCTT-0	Endothelial	Kupffer+MonoMac+Endothelial	880_13_63	NTC	2.61786	-0.0819924
AACTGCATCATGACGC-0	Endothelial	Kupffer+MonoMac+Endothelial	880_0_71	NTC	1.68915	-0.778293
AACTGCATCTGGTGTA-0	Endothelial	Kupffer+MonoMac+Endothelial	880_50_54	unassigned	0.900437	-1.36964
AACTGGTCAAGTCCCT-0	Endothelial	Kupffer+MonoMac+Endothelial	880_19_77	unassigned	2.56593	-0.12093
AACTGGTCACTCAGGA-0	CD8 T	CD8 T	880_16_73	Ifng	0.0902008	-0.608849
AACTGGTCATCATCAT-0	Kupffer	Kupffer+MonoMac+Endothelial	880_43_75	unassigned	0.800247	-1.68859
AACTTCCTCGCGCATG-0	Endothelial	Kupffer+MonoMac+Endothelial	880_37_26	unassigned	3.20375	0.357277
AACTTCTCAAATGCAC-0	Mono/Mac	Kupffer+MonoMac+Endothelial	880_63_11	unassigned	2.06007	0.302986
AACTTCTCATGTCGGA-0	CD8 T	CD8 T	880_17_25	unassigned	0.367805	-0.294645
AACTTCTCATTACATC-0	CD8 T	CD8 T	880_21_25	unassigned	1.14848	0.588956
AACTTGGTCACGCAGT-0	Kupffer	Kupffer+MonoMac+Endothelial	880_53_57	NTC	1.20784	-1.43637
AACTTGGTCAGCTCGG-0	Endothelial	Kupffer+MonoMac+Endothelial	880_13_47	unassigned	3.57155	0.633034
AAGCAACAGGATGGTG-0	CD8 T	CD8 T	880_56_51	NTC	0.360313	-0.303124
AAGCAATGTCTGTGTG-0	CD8 T	CD8 T	880_28_57	unassigned	-0.478222	-1.25222
AAGCAATGTGCGCAAG-0	NK	NK	880_44_52	NTC	0.110648	-1.11316
AAGCAATGTGGGTATA-0	Endothelial	Kupffer+MonoMac+Endothelial	880_44_44	NTC	2.52215	-0.153749
AAGCAATGTTTACCAA-0	Endothelial	Kupffer+MonoMac+Endothelial	880_14_67	unassigned	0.692309	-1.52568
AAGCACCTCACTGGTA-0	Kupffer	Kupffer+MonoMac+Endothelial	880_63_25	NTC	1.61178	-1.1864
AAGCACCTCTCATCTA-0	Kupffer	Kupffer+MonoMac+Endothelial	880_45_60	NTC	4.77012	0.768045
AAGCATCCAAGGTCGC-0	CD8 T	CD8 T	880_37_50	unassigned	-0.171542	-0.905102
AAGCATCCATAAGGTC-0	Kupffer	Kupffer+MonoMac+Endothelial	880_23_51	unassigned	1.41922	-1.30556
AAGCCAAGTGATCAAG-0	CD8 T	CD8 T	880_77_41	unassigned	0.92752	0.338865
AAGCCAAGTTCGATAC-0	DC	DC	880_38_56	NTC	0.420516	-1.04627
AAGCCAAGTTGCGCTA-0	Hepatocyte	Hepatocyte	880_66_54	unassigned	1.5446	-0.722227
AAGCCATCAAGGGAAC-0	HPC	HPC	880_43_11	unassigned	1.90075
AAGCCATCAAGTGAAG-0	DC	DC	880_68_40	NTC	1.15464	-0.36165
AAGCCCCGTTCGCTAG-0	Mono/Mac	Kupffer+MonoMac+Endothelial	880_7_72	NTC	0.697002	-0.869618
AAGCCGCCAACGTTAA-0	Erythrocytes	Erythrocytes	880_13_50	unassigned	1.13952	1.3538
AAGCCGGGTTATCCAA-0	T other	T other	880_24_62	NTC	-0.361214
AAGCGATAGATTAGCT-0	B cell	B cell	880_78_41	unassigned	0.442356	-0.308326
AAGCGCAAGCCAGCAT-0	Mono/Mac	Kupffer+MonoMac+Endothelial	880_32_21	unassigned	2.35622	0.557759
AAGCGCAAGGATCTCA-0	Endothelial	Kupffer+MonoMac+Endothelial	880_18_39	unassigned	5.09314	1.77385
AAGCGGATCGATGCTA-0	Mono/Mac	Kupffer+MonoMac+Endothelial	880_43_23	unassigned	0.0840837	-1.39689
AAGCGGATCTAACTCC-0	Erythrocytes	Erythrocytes	880_37_30	unassigned	-0.601287	-0.200182
AAGCGGGCATCGCGTT-0	Endothelial	Kupffer+MonoMac+Endothelial	880_13_71	unassigned	5.32051	1.94432
AAGCTAAAGATAGACA-0	Kupffer	Kupffer+MonoMac+Endothelial	880_43_56	NTC	4.65093	0.694286
AAGCTAAAGGAGCCTT-0	Endothelial	Kupffer+MonoMac+Endothelial	880_74_40	NTC	2.25205	-0.35626
AAGCTCGCAATTGAGC-0	Mono/Mac	Kupffer+MonoMac+Endothelial	880_33_16	unassigned	1.38425	-0.2784
AAGCTCTGTTCCTCTA-0	DC	DC	880_4_72	unassigned	1.72493	0.17019
AAGCTCTGTTCGTTCC-0	DC	DC	880_42_35	unassigned	1.1299	-0.384716
AAGCTTGTCCTCATAC-0	Endothelial	Kupffer+MonoMac+Endothelial	880_24_63	Ifng	1.68994	-0.777708
AAGGAAAGTATAGACG-0	Endothelial	Kupffer+MonoMac+Endothelial	880_70_16	unassigned	3.07412	0.260092
AAGGAAAGTCAGCTCA-0	Neutrophil	Neutrophil	880_53_68	NTC	4.14701	1.11476
AAGGAAAGTCCATATA-0	NKT	NKT	880_33_74	NTC	0.663542	0.383416
AAGGAAAGTCTCCAAG-0	Endothelial	Kupffer+MonoMac+Endothelial	880_42_31	unassigned	1.64893	-0.808449
AAGGAAAGTGAGTGAC-0	Mono/Mac	Kupffer+MonoMac+Endothelial	880_8_76	unassigned	3.20958	1.29187
AAGGAAAGTTCAAGTC-0	Mono/Mac	Kupffer+MonoMac+Endothelial	880_19_21	NTC	1.51693	-0.164258
AAGGAAAGTTCGCTGA-0	CD8 T	CD8 T	880_27_34	unassigned	-0.391574	-1.15414
AAGGAAAGTTTAGTGC-0	CD4 T	CD4 T	880_54_55	NTC	0.290208	-0.40336
AAGGACTAGGTAGCTC-0	Mono/Mac	Kupffer+MonoMac+Endothelial	880_40_14	unassigned	0.561492	-0.986194
AAGGACTAGGTGAACG-0	NK	NK	880_26_53	NTC	-0.16895	-1.4984
AAGGACTAGTCGATGC-0	CD8 T	CD8 T	880_48_27	NTC	-0.0052327	-0.716865
AAGGACTAGTTAGCGC-0	CD8 T	CD8 T	880_28_20	unassigned	0.00407421	-0.706331
AAGGATGCATAAGTTG-0	Endothelial	Kupffer+MonoMac+Endothelial	880_35_30	NTC	2.25164	-0.356567
AAGGATGCATTAAGTG-0	Endothelial	Kupffer+MonoMac+Endothelial	880_62_25	NTC	4.02183	0.970637
AAGGATGCATTAGTGA-0	DC	DC	880_59_36	unassigned	1.03318	-0.47492
AAGGCAACACAGGCTA-0	Kupffer	Kupffer+MonoMac+Endothelial	880_54_63	unassigned	3.55618	0.0168375
AAGGCCAAGGATTCGC-0	Endothelial	Kupffer+MonoMac+Endothelial	880_11_52	unassigned	4.47343	1.30923
AAGGCCAAGGTAAGTA-0	CD4 T	CD4 T	880_32_16	unassigned	1.20684	0.632859
AAGGCCAAGTCATCCT-0	Kupffer	Kupffer+MonoMac+Endothelial	880_17_45	unassigned	4.36039	0.514494
AAGGCCCCAAGCTTAA-0	Endothelial	Kupffer+MonoMac+Endothelial	880_49_69	NTC	0.935858	-1.34308
AAGGCCCCACTAACCC-0	B cell	B cell	880_23_20	unassigned	2.20208	1.5933
AAGGCCCCATAATCTC-0	Endothelial	Kupffer+MonoMac+Endothelial	880_50_37	unassigned	1.74414	-0.73707
AAGGCTAGTATGGGAC-0	Kupffer	Kupffer+MonoMac+Endothelial	880_23_20	unassigned	4.70855	0.729944
AAGGCTAGTGGAAGTC-0	Mono/Mac	Kupffer+MonoMac+Endothelial	880_52_16	NTC	1.26342	-0.382345
AAGGCTAGTTATAGCC-0	Kupffer	Kupffer+MonoMac+Endothelial	880_50_71	NTC	5.50478	1.22267
AAGGCTAGTTCGGTGC-0	Mono/Mac	Kupffer+MonoMac+Endothelial	880_45_35	Ifng	4.94949	2.78867
AAGGGCCAGCCTGACG-0	Mono/Mac	Kupffer+MonoMac+Endothelial	880_61_57	unassigned	0.993372	-0.614661
AAGGGCCAGCGCATCG-0	NK	NK	880_64_4	unassigned	0.748397	-0.234431
AAGGGTTAGCGGTCAT-0	Endothelial	Kupffer+MonoMac+Endothelial	880_4_29	unassigned	2.91027	0.137238
AAGGTATGTTTGAGCT-0	Kupffer	Kupffer+MonoMac+Endothelial	880_57_10	unassigned	1.65064	-1.16235
AAGGTCAGTCAAGGTA-0	Kupffer	Kupffer+MonoMac+Endothelial	880_44_54	NTC	1.0022	-1.56362
AAGGTCAGTTGAGTAG-0	DC	DC	880_71_47	unassigned	0.046054	-1.39549
AAGGTTAAGTATGGTT-0	Mono/Mac	Kupffer+MonoMac+Endothelial	880_45_55	NTC	2.06701	0.308956
AAGGTTGGTGAGGACT-0	CD8 T	CD8 T	880_29_24	NTC	0.344272	-0.32128
AAGGTTGGTGCAAGGT-0	DC	DC	880_4_6	unassigned	1.62405	0.0761164
AAGGTTGGTTAGACCT-0	pDC	pDC	880_44_14	NTC	-0.453646	-1.15263
AAGTAACGTCAATTCA-0	Mono/Mac	Kupffer+MonoMac+Endothelial	880_39_17	NTC	0.742759	-0.830255
AAGTAAGTCGATGTGC-0	Kupffer	Kupffer+MonoMac+Endothelial	880_5_50	unassigned	2.08603	-0.892921
AAGTACCCAAACCTGG-0	CD8 T	CD8 T	880_49_25	NTC	1.03587	0.461498
AAGTATGAGCCTATCT-0	NK	NK	880_25_49	NTC	1.30507	0.532584
AAGTATGAGTAATGAG-0	Kupffer	Kupffer+MonoMac+Endothelial	880_12_21	unassigned	0.906361	-1.62293
AAGTCACCAAGCTCAG-0	CD8 T	CD8 T	880_27_59	unassigned	-0.0375618	-0.753457
AAGTCACCACTACCCG-0	Mono/Mac	Kupffer+MonoMac+Endothelial	880_37_76	unassigned	2.16312	0.391636
AAGTCATTCACTTGGA-0	Mono/Mac	Kupffer+MonoMac+Endothelial	880_55_20	Ifng	4.24647	2.18388
AAGTCCATCAATCGCA-0	Endothelial	Kupffer+MonoMac+Endothelial	880_26_55	unassigned	0.864899	-1.39628
AAGTCGCTCACCTACT-0	CD8 T	CD8 T	880_15_75	NTC	1.73088	1.24814
AAGTGATGTAGCCTGC-0	Endothelial	Kupffer+MonoMac+Endothelial	880_71_39	Ifng	1.85142	-0.656633
AAGTGATGTTTCCGAG-0	DC	DC	880_5_77	unassigned	0.826009	-0.66812
AAGTGATGTTTCCGTC-0	Mono/Mac	Kupffer+MonoMac+Endothelial	880_56_39	NTC	1.57143	-0.117377
AAGTGCCTCCCCAGCT-0	DC	DC	880_34_29	NTC	1.63087	0.0824763
AAGTGCCTCCTGTAAG-0	DC	DC	880_50_47	unassigned	1.8304	0.268553
AAGTGGGTCCCCAATT-0	Mono/Mac	Kupffer+MonoMac+Endothelial	880_16_77	NTC	1.11528	-0.509791
AAGTGGGTCCGTTACT-0	CD8 T	CD8 T	880_69_27	unassigned	-0.311233	-1.06321
AAGTGGGTCGAACGAG-0	DC	DC	880_24_53	NTC	1.02709	-0.480592
AAGTGGGTCTGGTCCC-0	NK	NK	880_52_47	NTC	2.00211	1.49301
AAGTGTCCACCTATCA-0	Kupffer	Kupffer+MonoMac+Endothelial	880_37_24	NTC	1.41284	-1.30951
AAGTGTCCATTGCCGT-0	Endothelial	Kupffer+MonoMac+Endothelial	880_26_59	unassigned	2.48579	-0.181016
AAGTTGAAGTAGCCGT-0	Treg	Treg	880_69_21	unassigned	1.54549	0.635533
AAGTTGGGTTTAGTCA-0	DC	DC	880_26_56	unassigned	2.14322	0.560282
AAGTTGGGTTTGCATA-0	Treg	Treg	880_55_33	unassigned	2.51159	1.58127
AAGTTTGCAAGGTTAC-0	Endothelial	Kupffer+MonoMac+Endothelial	880_38_19	NTC	3.89711	0.877128
AAGTTTGCAATCTGCC-0	Mono/Mac	Kupffer+MonoMac+Endothelial	880_23_51	unassigned	0.473513	-1.06188
AATACGAAGCTACCGG-0	CD8 T	CD8 T	880_17_70	unassigned	-0.887324	-1.71525
AATACGAAGGCGCATT-0	Kupffer	Kupffer+MonoMac+Endothelial	880_50_62	NTC	4.47272	0.584007
AATACGAAGTCAGGGA-0	Mono/Mac	Kupffer+MonoMac+Endothelial	880_15_46	unassigned	2.80184	0.941109
AATACGCCACCTTGAC-0	Mono/Mac	Kupffer+MonoMac+Endothelial	880_54_70	unassigned	1.46175	-0.211732
AATACGCCATCAAGCG-0	CD8 T	CD8 T	880_50_37	unassigned	-0.737358	-1.54552
AATACGGGTTCACCTC-0	Endothelial	Kupffer+MonoMac+Endothelial	880_26_66	unassigned	2.31419	-0.30967
AATACGTTCTAAGCTG-0	CD8 T	CD8 T	880_49_44	NTC	2.15327	1.72623
AATATGCTCACGTAGC-0	Treg	Treg	880_52_73	unassigned	2.44351	1.51462
AATATGCTCCCGCACT-0	DC	DC	880_71_7	NTC	1.60942	0.0624697
AATATGCTCGAATCTG-0	Kupffer	Kupffer+MonoMac+Endothelial	880_72_46	unassigned	4.84717	0.815723
AATATGCTCGCGCAAT-0	Kupffer	Kupffer+MonoMac+Endothelial	880_13_54	NTC	3.86318	0.206816
AATATGCTCGTGATTG-0	pDC	pDC	880_28_64	NTC	-0.00633046	-0.597319
AATATGGAGCCAGACT-0	Neutrophil	Neutrophil	880_30_66	unassigned	2.49734	-0.00789883
AATCACTAGCCTGTCC-0	CD8 T	CD8 T	880_43_50	NTC	0.72718	0.112111
AATCACTAGGGCCATT-0	Endothelial	Kupffer+MonoMac+Endothelial	880_51_18	NTC	3.025	0.223263
AATCACTAGTGGCTTA-0	CD8 T	CD8 T	880_42_49	unassigned	1.48222	0.966699
AATCAGCCAAAGGACA-0	Endothelial	Kupffer+MonoMac+Endothelial	880_47_69	unassigned	3.24354	0.387108
AATCAGCCAGCTAGAT-0	Mono/Mac	Kupffer+MonoMac+Endothelial	880_27_50	unassigned	1.16305	-0.468696
AATCCAACATAGAGTC-0	Kupffer	Kupffer+MonoMac+Endothelial	880_63_49	Ifng	1.79476	-1.07317
AATCCATAGGGTCTCG-0	B cell	B cell	880_52_32	NTC	0.970537	0.262449
AATCCCAAGCGGTTCG-0	Mono/Mac	Kupffer+MonoMac+Endothelial	880_61_7	unassigned	1.98438	0.237875
AATCGCATCGAAGCTC-0	Kupffer	Kupffer+MonoMac+Endothelial	880_54_42	NTC	3.23794	-0.180097
AATCGGCTCTAGCCAA-0	DC	DC	880_12_18	NTC	3.38878	1.72186
AATCGTTAGGAGTCAG-0	Endothelial	Kupffer+MonoMac+Endothelial	880_46_74	unassigned	3.80312	0.806661
AATCGTTAGGATCTAT-0	Mono/Mac	Kupffer+MonoMac+Endothelial	880_38_21	NTC	0.788053	-0.791291
AATCGTTAGTTACGTG-0	DC	DC	880_52_36	unassigned	2.22228	0.634009
AATCTAGCAAACCGTG-0	NK	NK	880_68_39	NTC	1.33547	0.574473
AATCTAGCATCGTACC-0	Endothelial	Kupffer+MonoMac+Endothelial	880_1_74	unassigned	4.2533	1.14418
AATCTCCTCGACATTG-0	DC	DC	880_47_51	NTC	0.244668	-1.21027
AATCTGGTCGCGAACT-0	NK	NK	880_41_48	unassigned	0.238454	-0.937059
AATGAACGTAACCGGG-0	Endothelial	Kupffer+MonoMac+Endothelial	880_64_44	NTC	4.36131	1.22516
AATGAACGTAGTAACG-0	CD4 T	CD4 T	880_10_17	NTC	-0.336853	-1.11223
AATGAACGTAGTGACA-0	Kupffer	Kupffer+MonoMac+Endothelial	880_49_76	unassigned	3.48467	-0.0274157
AATGACAAGCAACCGT-0	DC	DC	880_56_43	NTC	0.702633	-0.783178
AATGACAAGGCGTCTG-0	Endothelial	Kupffer+MonoMac+Endothelial	880_58_74	unassigned	1.13925	-1.19059
AATGACAAGTGAGCAG-0	NK	NK	880_45_36	Ifng	1.10175	0.252437
AATGACCCAGGCTATG-0	Endothelial	Kupffer+MonoMac+Endothelial	880_10_54	unassigned	1.46099	-0.949359
AATGACTTCAGTTCGA-0	Endothelial	Kupffer+MonoMac+Endothelial	880_52_11	unassigned	2.94447	0.162881
AATGAGGCACAAGCCA-0	CD8 T	CD8 T	880_53_24	Ifng	1.01194	0.434419
AATGAGGCACCAACTC-0	Mono/Mac	Kupffer+MonoMac+Endothelial	880_63_45	NTC	2.80705	0.945594
AATGATGAGCGCCTTC-0	Kupffer	Kupffer+MonoMac+Endothelial	880_60_9	unassigned	5.10276	0.97389
AATGATGAGGTATGAA-0	CD8 T	CD8 T	880_9_36	unassigned	-0.0325753	-0.747813
AATGCAAAGAAGGTGT-0	Mono/Mac	Kupffer+MonoMac+Endothelial	880_54_42	NTC	2.89892	1.02462
AATGCACCAAGGTATC-0	Endothelial	Kupffer+MonoMac+Endothelial	880_31_63	NTC	1.97857	-0.561302
AATGCACCATGCAGGC-0	Neutrophil	Neutrophil	880_17_72	unassigned	3.9455	0.977619
AATGCAGGTAGCCCGT-0	Endothelial	Kupffer+MonoMac+Endothelial	880_31_67	unassigned	0.868396	-1.39366
AATGCGAGTTGTCCAG-0	CD8 T	CD8 T	880_68_47	unassigned	1.48584	0.9708
AATGCGGAGCCTAGCG-0	Mono/Mac	Kupffer+MonoMac+Endothelial	880_25_70	NTC	2.83834	0.972509
AATGCGGAGGTTGCTA-0	Kupffer	Kupffer+MonoMac+Endothelial	880_6_66	NTC	2.41077	-0.691971
AATGCGGAGGTTGGTC-0	Erythrocytes	Erythrocytes	880_37_53	NTC	-0.197282	0.160465
AATGGATGTCTAAGCT-0	Kupffer	Kupffer+MonoMac+Endothelial	880_21_73	NTC	3.70926	0.111565
AATGGATGTTGGGCCT-0	CD8 T	CD8 T	880_67_27	NTC	1.3026	0.763397
AATGGCAGTAAGGTAT-0	Endothelial	Kupffer+MonoMac+Endothelial	880_57_63	NTC	3.3949	0.500596
AATGGCTCACCATTCA-0	CD8 T	CD8 T	880_53_73	NTC	2.34328	1.94129
AATGGGCGTAGTGAGC-0	CD8 T	CD8 T	880_0_71	NTC	0.540001	-0.0997456
AATGGGGTCGAACCCG-0	Kupffer	Kupffer+MonoMac+Endothelial	880_57_11	unassigned	3.19474	-0.20683
AATGGGTAGATAGTTC-0	Mono/Mac	Kupffer+MonoMac+Endothelial	880_75_4	unassigned	1.88427	0.15175
AATGGGTAGCAATTCG-0	DC	DC	880_37_73	Ifng	0.825096	-0.668972
AATGGTAAGGCACTCG-0	NK	NK	880_16_52	NTC	0.580797	-0.465361
AATGTCCGTGAAGCAC-0	Mono/Mac	Kupffer+MonoMac+Endothelial	880_34_78	NTC	1.93801	0.197983
AATGTCCGTTCGTGAT-0	CD8 T	CD8 T	880_4_40	unassigned	0.360511	-0.3029
AATGTGAAGATTCAGT-0	Kupffer	Kupffer+MonoMac+Endothelial	880_23_18	NTC	3.37167	-0.0973425
AATGTGTTCAGTGCCG-0	B cell	B cell	880_66_16	unassigned	2.01332	1.38932
AATGTGTTCCGGACAT-0	CD8 T	CD8 T	880_34_15	NTC	-0.982304	-1.82276
AATGTGTTCTAGCTCT-0	Mono/Mac	Kupffer+MonoMac+Endothelial	880_50_62	NTC	0.253154	-1.25145
AATGTGTTCTCACTTA-0	Endothelial	Kupffer+MonoMac+Endothelial	880_45_20	NTC	2.69618	-0.0232699
AATGTTGCAAGCACGC-0	NK	NK	880_64_37	unassigned	0.675021	-0.335533
AATTACGCAAGTTCGG-0	B cell	B cell	880_49_75	unassigned	2.39248	1.79906
AATTCCTCAACTCGCT-0	B cell	B cell	880_51_44	NTC	-0.446359	-1.26871
AATTGGGGTAACGAGC-0	Kupffer	Kupffer+MonoMac+Endothelial	880_56_34	unassigned	1.0436	-1.538
AATTGGGGTCTGTGGC-0	CD8 T	CD8 T	880_0_61	unassigned	1.49898	0.985667
AATTGGGGTGGGTATA-0	CD4 T	CD4 T	880_76_18	Ifng	0.357034	-0.327816
AATTGGGGTTGTGCTG-0	B cell	B cell	880_71_42	unassigned	2.37169	1.77659
AATTGGTTCGCTGATA-0	DC	DC	880_10_51	NTC	1.08178	-0.429598
AATTGTCAGCATCCAA-0	CD8 T	CD8 T	880_2_56	unassigned	1.60175	1.10198
AATTGTCAGCGAAGCA-0	pDC	pDC	880_4_51	Ifng	-0.246637	-0.895641
AATTGTCAGCGATGCT-0	DC	DC	880_55_10	unassigned	1.17528	-0.342397
AATTGTCAGGCGCTAT-0	Kupffer	Kupffer+MonoMac+Endothelial	880_43_56	NTC	1.66278	-1.15484
AATTGTCAGTCATCTC-0	CD8 T	CD8 T	880_67_41	NTC	0.680741	0.0595501
ACAACAGGTATTAGCC-0	Kupffer	Kupffer+MonoMac+Endothelial	880_0_21	unassigned	2.6589	-0.538418
ACAACAGGTTGGCATT-0	CD8 T	CD8 T	880_54_22	NTC	0.184345	-0.502293
ACAACATTCCCCAGGA-0	Neutrophil	Neutrophil	880_71_8	NTC	0.771889	-1.18213
ACAACATTCCCGTGAG-0	DC	DC	880_60_28	unassigned	3.34599	1.68195
ACAACATTCCTGAGAC-0	Endothelial	Kupffer+MonoMac+Endothelial	880_42_52	NTC	3.15863	0.323449
ACAACCATCACACCAA-0	CD8 T	CD8 T	880_26_20	NTC	0.496883	-0.148548
ACAACCATCATGCCGG-0	Kupffer	Kupffer+MonoMac+Endothelial	880_65_19	NTC	2.10527	-0.881017
ACAACCGCACCTAATT-0	B cell	B cell	880_48_27	NTC	0.0301946	-0.753725
ACAAGCCTCAATCAGT-0	Endothelial	Kupffer+MonoMac+Endothelial	880_23_64	unassigned	1.5489	-0.883453
ACAAGCCTCATCACAG-0	Mono/Mac	Kupffer+MonoMac+Endothelial	880_6_62	NTC	1.60766	-0.0862036
ACAAGCCTCGCTCCTA-0	B cell	B cell	880_16_51	NTC	0.168005	-0.604802
ACAAGCCTCTCATCCG-0	DC	DC	880_30_20	NTC	1.11991	-0.394039
ACAAGCTCACTAACGG-0	pDC	pDC	880_51_13	unassigned	-0.067448	-0.673191
ACAAGCTCACTTCAGC-0	Neutrophil	Neutrophil	880_56_17	NTC	4.95831	1.66687
ACAAGGCGTGAAGCAC-0	Endothelial	Kupffer+MonoMac+Endothelial	880_14_77	NTC	2.37432	-0.26459
ACAAGGGTCGACATCA-0	Endothelial	Kupffer+MonoMac+Endothelial	880_77_41	unassigned	1.30454	-1.06666
ACAAGGTAGAATCGTT-0	DC	DC	880_59_20	unassigned	0.661437	-0.821596
ACAAGGTAGCGATGCT-0	pDC	pDC	880_9_77	unassigned	-0.61883	-1.35769
ACAAGGTAGCTTAGTG-0	Endothelial	Kupffer+MonoMac+Endothelial	880_38_79	unassigned	3.21822	0.368124
ACAAGGTAGGTTACAT-0	NK	NK	880_42_26	NTC	1.33485	0.57362
ACAAGGTAGGTTCGTA-0	Mono/Mac	Kupffer+MonoMac+Endothelial	880_61_53	unassigned	2.19928	0.422749
ACAAGTAAGGCAATGG-0	CD8 T	CD8 T	880_30_21	NTC	0.163088	-0.526353
ACAAGTTTCCCGTTGC-0	Mono/Mac	Kupffer+MonoMac+Endothelial	880_25_56	unassigned	0.751033	-0.823137
ACAAGTTTCGATTAGT-0	B cell	B cell	880_25_56	unassigned	0.277088	-0.486921
ACAATAGAGGAGTAGT-0	Mono/Mac	Kupffer+MonoMac+Endothelial	880_54_57	NTC	2.58753	0.756745
ACAATCACATCGGCTT-0	DC	DC	880_68_40	NTC	0.226621	-1.2271
ACAATCACATGAAGCT-0	Cholangiocyte	Cholangiocyte	880_51_13	unassigned	1.32009
ACAATCCGTAACTCCG-0	CD8 T	CD8 T	880_37_24	NTC	0.0127288	-0.696536
ACAATCCGTATGTGGA-0	Mono/Mac	Kupffer+MonoMac+Endothelial	880_66_41	NTC	1.56752	-0.120739
ACAATCCGTCAGCTAT-0	Mono/Mac	Kupffer+MonoMac+Endothelial	880_72_8	NTC	1.30455	-0.346962
ACAATGAAGGAATGCG-0	Mono/Mac	Kupffer+MonoMac+Endothelial	880_63_15	unassigned	1.70679	-0.000929486
ACAATTCAGAAGCTCC-0	CD8 T	CD8 T	880_61_30	unassigned	0.370615	-0.291464
ACAATTCAGGGTTAGG-0	CD8 T	CD8 T	880_63_49	Ifng	0.580527	-0.053877
ACACAACCAAGGTCAT-0	Kupffer	Kupffer+MonoMac+Endothelial	880_47_22	NTC	2.49425	-0.640308
ACACAAGGTCAGCTCA-0	NK	NK	880_31_14	unassigned	1.95574	1.42911
ACACACGCAATCGCTC-0	Endothelial	Kupffer+MonoMac+Endothelial	880_35_56	unassigned	2.49817	-0.17173
ACACACGCATCGACTC-0	NK	NK	880_51_24	Ifng	1.09064	0.237135
ACACACGCATGAGCGC-0	Endothelial	Kupffer+MonoMac+Endothelial	880_27_53	unassigned	2.04587	-0.510843
ACACAGTCATCCTCGG-0	Mono/Mac	Kupffer+MonoMac+Endothelial	880_40_27	NTC	0.797327	-0.783313
ACACATTAGTGTCATG-0	CD8 T	CD8 T	880_23_51	unassigned	0.732541	0.118179
ACACCAATCCTCTATA-0	Mono/Mac	Kupffer+MonoMac+Endothelial	880_36_53	NTC	0.0135623	-1.45756
ACACCAGCACAATCCC-0	CD8 T	CD8 T	880_68_53	unassigned	-0.383198	-1.14466
ACACCCAGTATTGCCG-0	Mono/Mac	Kupffer+MonoMac+Endothelial	880_60_29	unassigned	5.34433	3.12834
ACACCCAGTATTGCGT-0	CD4 T	CD4 T	880_44_16	NTC	0.228645	-0.472955
ACACCCAGTGGACAGT-0	CD8 T	CD8 T	880_34_51	unassigned	0.288884	-0.383971
ACACCCAGTTGCAGGG-0	NK	NK	880_70_23	NTC	0.659043	-0.357548
ACACCCTCACTCAAGG-0	Mono/Mac	Kupffer+MonoMac+Endothelial	880_75_16	unassigned	1.98916	0.241983
ACACCCTCATCGACAG-0	B cell	B cell	880_62_58	unassigned	0.402285	-0.351628
ACACGAAGTAACGTGA-0	DC	DC	880_39_36	NTC	1.26478	-0.25893
ACACGAAGTGCACGCT-0	B cell	B cell	880_74_46	unassigned	0.650774	-0.0831011
ACACGAAGTGCATTAC-0	Treg	Treg	880_78_8	unassigned	0.430348	-0.456099
ACACGAAGTTAGTTCA-0	B cell	B cell	880_48_61	NTC	0.102888	-0.675169
ACACGAAGTTCACCGA-0	Treg	Treg	880_53_16	NTC	2.76662	1.83093
ACACGATCAACTTCAT-0	Endothelial	Kupffer+MonoMac+Endothelial	880_49_14	unassigned	4.0109	0.96244
ACACGATCAAGCGGTC-0	Kupffer	Kupffer+MonoMac+Endothelial	880_0_74	unassigned	5.15247	1.00465
ACACGATCAGCAGTAT-0	Mono/Mac	Kupffer+MonoMac+Endothelial	880_40_78	NTC	0.440793	-1.09003
ACACGGGGTTTGGAGA-0	Endothelial	Kupffer+MonoMac+Endothelial	880_16_77	NTC	3.34037	0.459707
ACACGGTTCCCGCACT-0	Mono/Mac	Kupffer+MonoMac+Endothelial	880_43_17	NTC	1.56929	-0.119219
ACACGTTGTTTCGTAA-0	Endothelial	Kupffer+MonoMac+Endothelial	880_73_10	NTC	-0.683179	-2.55696
ACACTAGTCCGTATGA-0	NK	NK	880_53_64	NTC	2.22574	1.80113
ACACTAGTCGCTTCCA-0	B cell	B cell	880_64_9	unassigned	0.333973	-0.425449
ACACTCCCAGTAATCA-0	CD8 T	CD8 T	880_36_17	unassigned	-0.335126	-1.09025
ACACTCCCATCCTTAG-0	Neutrophil	Neutrophil	880_41_16	unassigned	2.90347	0.268483
ACACTGATCCGTATGA-0	CD8 T	CD8 T	880_21_58	unassigned	1.1211	0.557973
ACACTGATCTTGACTC-0	CD8 T	CD8 T	880_40_19	NTC	-0.138092	-0.867241
ACAGAACAGAACGGAT-0	Mono/Mac	Kupffer+MonoMac+Endothelial	880_37_24	NTC	0.298552	-1.21239
ACAGAACAGGATGACG-0	DC	DC	880_43_33	Ifng	1.47336	-0.0644136
ACAGAACAGGTTCCAA-0	B cell	B cell	880_62_38	unassigned	-0.022726	-0.810913
ACAGACAGTAGCTATC-0	Mono/Mac	Kupffer+MonoMac+Endothelial	880_56_52	NTC	1.13601	-0.491952
ACAGACAGTTGGAAGC-0	Treg	Treg	880_34_25	NTC	0.741964	-0.151051
ACAGACAGTTTAGCAC-0	CD8 T	CD8 T	880_18_76	NTC	0.936295	0.348797
ACAGACTCAACCTCGT-0	NKT	NKT	880_32_21	unassigned	0.261	-0.320885
ACAGATGGTAAGCTGA-0	Mono/Mac	Kupffer+MonoMac+Endothelial	880_42_20	unassigned	2.62007	0.784735
ACAGATGGTCAAGTCT-0	Mono/Mac	Kupffer+MonoMac+Endothelial	880_61_53	unassigned	2.33551	0.539941
ACAGCAAGTGCAACTT-0	Kupffer	Kupffer+MonoMac+Endothelial	880_52_55	unassigned	4.35954	0.513968
ACAGCAAGTGGCTTCA-0	DC	DC	880_13_63	NTC	1.20304	-0.31651
ACAGCCACAAAGGTGA-0	B cell	B cell	880_26_23	NTC	0.543418	-0.199114
ACAGCCACATCGGCTT-0	Endothelial	Kupffer+MonoMac+Endothelial	880_39_48	unassigned	2.20602	-0.390773
ACAGCTATCAATCCAG-0	DC	DC	880_53_64	NTC	0.848697	-0.646962
ACAGCTCAGCAAGCCT-0	Mono/Mac	Kupffer+MonoMac+Endothelial	880_35_28	NTC	1.03878	-0.575596
ACAGCTTGTGACTCCA-0	Mono/Mac	Kupffer+MonoMac+Endothelial	880_21_22	unassigned	1.80699	0.0852689
ACAGCTTGTGCAGCTC-0	NK	NK	880_33_55	unassigned	1.13415	0.297078
ACAGCTTGTGGAGCCA-0	Mono/Mac	Kupffer+MonoMac+Endothelial	880_62_16	NTC	0.931356	-0.668011
ACAGGAACAATTCATC-0	CD8 T	CD8 T	880_55_58	NTC	-0.437669	-1.20632
ACAGGAACAGGGACTC-0	Mono/Mac	Kupffer+MonoMac+Endothelial	880_18_19	unassigned	2.05788	0.301101
ACAGGATAGTGAAGCG-0	Mono/Mac	Kupffer+MonoMac+Endothelial	880_69_36	Ifng	2.2069	0.429304
ACAGGATAGTTAGATC-0	DC	DC	880_50_25	unassigned	0.0305105	-1.40998
ACAGGCAAGCAACCCG-0	Mono/Mac	Kupffer+MonoMac+Endothelial	880_18_47	unassigned	3.46934	1.51534
ACAGGCAAGCATAGTT-0	CD8 T	CD8 T	880_4_75	NTC	0.978915	0.397036
ACAGGCAAGGGGTTGA-0	B cell	B cell	880_36_16	Ifng	0.747071	0.0209616
ACAGGCAAGTAACCTG-0	Mono/Mac	Kupffer+MonoMac+Endothelial	880_41_28	NTC	1.69343	-0.012424
ACAGGCGGTGCGTAGG-0	Kupffer	Kupffer+MonoMac+Endothelial	880_12_22	NTC	3.18116	-0.215236
ACAGGCTTCCCTGTCA-0	Neutrophil	Neutrophil	880_25_44	unassigned	1.65694	-0.579825
ACAGGGATCCTGAATG-0	CD8 T	CD8 T	880_1_77	unassigned	1.11145	0.547049
ACAGGGATCCTTCCAG-0	Kupffer	Kupffer+MonoMac+Endothelial	880_44_58	Ifng	5.23214	1.05395
ACAGGGGCACTTAACT-0	Endothelial	Kupffer+MonoMac+Endothelial	880_20_75	unassigned	0.622336	-1.57814
ACAGGGGCATCCTACA-0	Kupffer	Kupffer+MonoMac+Endothelial	880_37_48	NTC	4.7775	0.772612
ACAGGTAGTTTGGAGA-0	CD8 T	CD8 T	880_75_29	unassigned	0.0253992	-0.682195
ACAGGTGAGCAGGTCT-0	Kupffer	Kupffer+MonoMac+Endothelial	880_53_59	NTC	3.07619	-0.280193
ACAGGTGAGTTACCAG-0	Mono/Mac	Kupffer+MonoMac+Endothelial	880_21_16	NTC	0.213207	-1.28581
ACAGTCATCCAGCGAT-0	B cell	B cell	880_54_27	unassigned	0.0672794	-0.713649
ACAGTCGCATAGGCGC-0	Endothelial	Kupffer+MonoMac+Endothelial	880_35_12	NTC	3.12753	0.30013
ACAGTGAGTGAGGACT-0	Kupffer	Kupffer+MonoMac+Endothelial	880_49_51	NTC	2.41734	-0.687902
ACAGTGAGTTGGAATG-0	Mono/Mac	Kupffer+MonoMac+Endothelial	880_47_62	NTC	1.63534	-0.0623911
ACAGTGAGTTTCGTCC-0	Kupffer	Kupffer+MonoMac+Endothelial	880_0_62	unassigned	1.585	-1.20297
ACAGTTACAACCGTAG-0	Endothelial	Kupffer+MonoMac+Endothelial	880_33_23	unassigned	3.96478	0.927863
ACAGTTACAGCACTCT-0	CD8 T	CD8 T	880_53_53	unassigned	-0.172366	-0.906034
ACAGTTGTCGATACGC-0	CD8 T	CD8 T	880_77_29	unassigned	1.09861	0.532511
ACAGTTGTCGTAACCA-0	NKT	NKT	880_74_41	NTC	0.386621	-0.101094
ACAGTTTAGGCGCTAT-0	CD8 T	CD8 T	880_75_28	NTC	-0.383583	-1.1451
ACAGTTTAGGTTCACA-0	CD8 T	CD8 T	880_21_63	unassigned	0.377875	-0.283247
ACATAGAAGGTAGGCA-0	Kupffer	Kupffer+MonoMac+Endothelial	880_29_52	NTC	3.28631	-0.150167
ACATAGCCATCCAGAG-0	Neutrophil	Neutrophil	880_32_57	NTC	2.34196	-0.113645
ACATATCAGCCACTAA-0	Neutrophil	Neutrophil	880_79_10	unassigned	0.208703	-1.5654
ACATATCAGGATGAAC-0	Kupffer	Kupffer+MonoMac+Endothelial	880_62_10	unassigned	5.31157	1.1031
ACATATCAGGATGGGC-0	Mono/Mac	Kupffer+MonoMac+Endothelial	880_71_42	unassigned	1.27878	-0.369131
ACATCATAGGCTTAAT-0	Kupffer	Kupffer+MonoMac+Endothelial	880_57_46	NTC	3.61358	0.052355
ACATCCCCAACCAGTG-0	Mono/Mac	Kupffer+MonoMac+Endothelial	880_21_63	unassigned	2.54605	0.721062
ACATCCCCAGGCATAT-0	NK	NK	880_57_37	NTC	1.76997	1.17315
ACATCCGGTAACGGTA-0	Mono/Mac	Kupffer+MonoMac+Endothelial	880_18_21	NTC	0.897181	-0.697411
ACATCCGGTAAGTACG-0	DC	DC	880_16_46	unassigned	2.21772	0.629761
ACATCCGGTCAATCAC-0	Hepatocyte	Hepatocyte	880_28_51	NTC	1.84196	-0.44484
ACATCCGGTTCCTGTC-0	Kupffer	Kupffer+MonoMac+Endothelial	880_17_74	unassigned	4.41659	0.549271
ACATCTTCATCCCTAA-0	Mono/Mac	Kupffer+MonoMac+Endothelial	880_57_14	NTC	1.75939	0.0443239
ACATCTTCATCGGGAC-0	Mono/Mac	Kupffer+MonoMac+Endothelial	880_76_39	NTC	4.98236	2.81694
ACATGAAAGAAGCGCA-0	CD8 T	CD8 T	880_41_76	NTC	1.53807	1.02991
ACATGAAAGTAGGTCC-0	CD8 T	CD8 T	880_1_63	NTC	0.566885	-0.0693172
ACATGAAAGTTAGGAA-0	DC	DC	880_45_14	NTC	0.847495	-0.648083
ACATGAGGTTGGATAG-0	CD8 T	CD8 T	880_47_20	unassigned	-0.532728	-1.31391
ACATGCATCCACGGCA-0	Mono/Mac	Kupffer+MonoMac+Endothelial	880_50_62	NTC	-0.153799	-1.60154
ACATGCATCCGCCTAC-0	CD8 T	CD8 T	880_49_25	NTC	-0.289149	-1.03821
ACATGCCAGATTACGT-0	T other	T other	880_36_75	unassigned	0.995744
ACATGCCAGCGAGACA-0	Mono/Mac	Kupffer+MonoMac+Endothelial	880_31_23	NTC	0.667415	-0.895072
ACATGCCAGGGGATCA-0	Mono/Mac	Kupffer+MonoMac+Endothelial	880_51_52	unassigned	1.49476	-0.18333
ACATGGTCAACTCGGA-0	Endothelial	Kupffer+MonoMac+Endothelial	880_48_68	unassigned	0.885762	-1.38064
ACATTAGCACAGGCTA-0	Treg	Treg	880_52_70	unassigned	0.54578	-0.3431
ACATTAGCATCCCAAC-0	CD8 T	CD8 T	880_2_62	unassigned	0.530098	-0.110955
ACATTCAGTGATCCAT-0	DC	DC	880_66_33	NTC	3.20685	1.5522
ACATTCAGTTCGCACA-0	CD8 T	CD8 T	880_37_30	unassigned	0.110857	-0.58547
ACATTCCTCACTAGAT-0	Mono/Mac	Kupffer+MonoMac+Endothelial	880_30_75	NTC	4.43239	2.34382
ACATTCCTCCCATATC-0	CD8 T	CD8 T	880_26_56	unassigned	1.51169	1.00005
ACATTGGTCGAATCCA-0	DC	DC	880_22_55	unassigned	0.882893	-0.615072
ACATTTCCATTCAACT-0	Mono/Mac	Kupffer+MonoMac+Endothelial	880_34_30	NTC	1.95888	0.215939
ACATTTGGTTTCCTTG-0	Kupffer	Kupffer+MonoMac+Endothelial	880_0_61	unassigned	6.30046	1.71505
ACCAAACCACAAGCGC-0	Mono/Mac	Kupffer+MonoMac+Endothelial	880_47_10	unassigned	1.65583	-0.0447683
ACCAAACCATAAGCCG-0	CD8 T	CD8 T	880_23_51	unassigned	-0.0586879	-0.777368
ACCAAAGGTAGCGGAT-0	Endothelial	Kupffer+MonoMac+Endothelial	880_35_79	unassigned	4.53521	1.35555
ACCAAAGGTTTACCTT-0	pDC	pDC	880_34_18	unassigned	0.315782	-0.197439
ACCAAATTCAGGAAGT-0	CD8 T	CD8 T	880_60_52	unassigned	-0.315319	-1.06783
ACCAAATTCCCCAGCT-0	Kupffer	Kupffer+MonoMac+Endothelial	880_31_24	NTC	2.92213	-0.37553
ACCAAATTCGCGTTCC-0	Endothelial	Kupffer+MonoMac+Endothelial	880_57_16	unassigned	2.24873	-0.358747
ACCAACATCGATAGGG-0	Kupffer	Kupffer+MonoMac+Endothelial	880_23_54	NTC	2.76266	-0.474212
ACCAAGTCAACTGTAA-0	Mono/Mac	Kupffer+MonoMac+Endothelial	880_79_28	NTC	0.713221	-0.855666
ACCAATGTCACAGCGT-0	Mono/Mac	Kupffer+MonoMac+Endothelial	880_51_22	unassigned	0.487991	-1.04942
ACCAATTAGATTAGGA-0	B cell	B cell	880_12_79	NTC	-0.117609	-0.913447
ACCAATTAGTGAGCCT-0	NK	NK	880_57_50	unassigned	0.880145	-0.0529016
ACCACAATCTAACCCT-0	Mono/Mac	Kupffer+MonoMac+Endothelial	880_19_59	unassigned	2.09062	0.329264
ACCACACAGTCAGTGC-0	CD4 T	CD4 T	880_60_15	NTC	3.24346	2.93517
ACCACACAGTCATCAG-0	DC	DC	880_48_55	Ifng	0.833216	-0.661399
ACCACAGCATGACTCC-0	Mono/Mac	Kupffer+MonoMac+Endothelial	880_41_74	NTC	0.476432	-1.05937
ACCACAGCATGCAGAT-0	Mono/Mac	Kupffer+MonoMac+Endothelial	880_32_19	unassigned	1.45678	-0.216006
ACCACCTCAAGGTCCA-0	CD8 T	CD8 T	880_0_62	unassigned	-0.597283	-1.38697
ACCACCTCAATCGGTG-0	CD8 T	CD8 T	880_28_53	unassigned	0.769072	0.159526
ACCACTAAGATTCAAC-0	Endothelial	Kupffer+MonoMac+Endothelial	880_28_77	NTC	2.91815	0.143148
ACCACTAAGCGCCTTC-0	Mono/Mac	Kupffer+MonoMac+Endothelial	880_18_19	unassigned	2.85705	0.988606
ACCACTAAGGTGGAGC-0	B cell	B cell	880_10_75	unassigned	1.78267	1.14007
ACCAGGCCAGTTAGAC-0	Treg	Treg	880_29_25	NTC	1.38021	0.473736
ACCATAACAAATGCTA-0	Kupffer	Kupffer+MonoMac+Endothelial	880_61_31	unassigned	4.61547	0.672344
ACCATAACAAGGGATA-0	B cell	B cell	880_2_70	NTC	0.811451	0.0905336
ACCATAACACCTTGAC-0	Kupffer	Kupffer+MonoMac+Endothelial	880_59_13	NTC	2.38402	-0.708522
ACCATATAGGGTCATC-0	CD8 T	CD8 T	880_73_42	unassigned	0.202425	-0.481829
ACCATATAGGTTACGC-0	pDC	pDC	880_51_62	NTC	0.00439685	-0.584001
ACCATATAGTTAGACT-0	Endothelial	Kupffer+MonoMac+Endothelial	880_54_66	NTC	2.92658	0.149467
ACCATCAAGAAGGTCG-0	Erythrocytes	Erythrocytes	880_27_55	unassigned	0.143578	0.464745
ACCATCAAGCTGGCTG-0	B cell	B cell	880_52_46	unassigned	0.2114	-0.557907
ACCATCCCACAATCAA-0	Endothelial	Kupffer+MonoMac+Endothelial	880_43_37	unassigned	2.14185	-0.438886
ACCATCCCATCGCTCG-0	DC	DC	880_54_36	unassigned	0.963695	-0.539718
ACCATTAGTGAGATTG-0	B cell	B cell	880_40_71	unassigned	-0.656138	-1.4954
ACCATTGAGAACGAAC-0	B cell	B cell	880_7_44	NTC	1.4298	0.758744
ACCATTGAGCTAGATT-0	Endothelial	Kupffer+MonoMac+Endothelial	880_38_52	NTC	1.2343	-1.11932
ACCATTGAGGAACCTC-0	Endothelial	Kupffer+MonoMac+Endothelial	880_33_60	unassigned	0.847113	-1.40962
ACCATTTCAACTAATG-0	B cell	B cell	880_64_16	NTC	1.25455	0.569362
ACCATTTCAAGTGTCG-0	DC	DC	880_15_17	NTC	1.47837	-0.0597459
ACCATTTCACTCATGC-0	Neutrophil	Neutrophil	880_75_41	NTC	2.20501	-0.206843
ACCATTTCAGGAACTT-0	Mono/Mac	Kupffer+MonoMac+Endothelial	880_11_45	unassigned	0.275444	-1.23227
ACCATTTCATTAGCTT-0	Mono/Mac	Kupffer+MonoMac+Endothelial	880_31_20	NTC	4.01162	1.98184
ACCCAAATCGCTGATA-0	Mono/Mac	Kupffer+MonoMac+Endothelial	880_26_19	NTC	-0.135174	-1.58551
ACCCAGTAGATTAAGG-0	Mono/Mac	Kupffer+MonoMac+Endothelial	880_76_16	Ifng	3.01226	1.12213
ACCCAGTAGCCAACTA-0	Mono/Mac	Kupffer+MonoMac+Endothelial	880_54_47	NTC	0.97849	-0.627463
ACCCAGTAGCGCATGT-0	Endothelial	Kupffer+MonoMac+Endothelial	880_45_17	unassigned	0.223558	-1.87713
ACCCATCCAATAGGGA-0	Neutrophil	Neutrophil	880_0_77	unassigned	2.90294	0.268126
ACCCATCCAGGGACTC-0	Mono/Mac	Kupffer+MonoMac+Endothelial	880_39_21	unassigned	1.80163	0.0806612
ACCCATCCATTAGTAG-0	Endothelial	Kupffer+MonoMac+Endothelial	880_9_68	unassigned	2.14923	-0.433349
ACCCATGGTTATCTGA-0	Kupffer	Kupffer+MonoMac+Endothelial	880_16_70	unassigned	4.36787	0.519128
ACCCATGGTTTCCTGC-0	Treg	Treg	880_1_62	unassigned	-0.284866	-1.15624
ACCCATTTCAGTAATC-0	Endothelial	Kupffer+MonoMac+Endothelial	880_26_23	NTC	1.94732	-0.58473
ACCCCAAGTTATCAGC-0	CD8 T	CD8 T	880_26_65	unassigned	-0.134859	-0.863582
ACCCCAAGTTGTGCTG-0	Kupffer	Kupffer+MonoMac+Endothelial	880_44_58	Ifng	5.12164	0.985575
ACCCCGAAGGAATGAC-0	Endothelial	Kupffer+MonoMac+Endothelial	880_57_65	unassigned	2.1493	-0.433299
ACCCCGTTCACAGCAC-0	Endothelial	Kupffer+MonoMac+Endothelial	880_24_63	Ifng	1.31983	-1.05519
ACCCCGTTCTAAGTCG-0	Mono/Mac	Kupffer+MonoMac+Endothelial	880_41_44	unassigned	1.95195	0.209978
ACCCGATAGTAGCACC-0	NK	NK	880_40_74	NTC	1.04329	0.171885
ACCCGCAAGAATCACT-0	CD4 T	CD4 T	880_13_18	NTC	0.208337	-0.495912
ACCCGCAAGTCGAAGG-0	CD8 T	CD8 T	880_40_16	unassigned	-0.0148425	-0.727742
ACCCGCTTCCAGGTTA-0	Endothelial	Kupffer+MonoMac+Endothelial	880_18_11	unassigned	2.19191	-0.401351
ACCCGCTTCGCGATTA-0	Endothelial	Kupffer+MonoMac+Endothelial	880_36_20	NTC	3.49516	0.575764
ACCCGTAGTTGGTAGA-0	Endothelial	Kupffer+MonoMac+Endothelial	880_13_54	NTC	3.61557	0.666043
ACCCGTAGTTGTAAGG-0	Kupffer	Kupffer+MonoMac+Endothelial	880_18_21	NTC	7.48777	2.44978
ACCCTAGGTATTAGCC-0	Mono/Mac	Kupffer+MonoMac+Endothelial	880_59_11	unassigned	0.3914	-1.13252
ACCCTATTCACAGCAC-0	Kupffer	Kupffer+MonoMac+Endothelial	880_56_40	NTC	2.62606	-0.558743
ACCCTATTCCTCACTG-0	Endothelial	Kupffer+MonoMac+Endothelial	880_35_13	NTC	0.249669	-1.85755
ACCCTCTGTCAAGCCC-0	Endothelial	Kupffer+MonoMac+Endothelial	880_54_51	NTC	2.82212	0.0711514
ACCCTCTGTCTAATGC-0	Kupffer	Kupffer+MonoMac+Endothelial	880_50_37	unassigned	4.22263	0.42925
ACCCTCTGTGAAGTTG-0	Endothelial	Kupffer+MonoMac+Endothelial	880_27_18	unassigned	4.51755	1.3423
ACCCTCTGTTGACGCC-0	Mono/Mac	Kupffer+MonoMac+Endothelial	880_55_24	unassigned	1.0719	-0.547104
ACCCTCTGTTTGCATA-0	CD8 T	CD8 T	880_36_72	Ifng	-0.193507	-0.929962
ACCCTTTAGCAGGTCT-0	Mono/Mac	Kupffer+MonoMac+Endothelial	880_36_52	NTC	1.06245	-0.555231
ACCGACCGTGCGGTCT-0	CD8 T	CD8 T	880_16_75	NTC	1.93236	1.47619
ACCGACTAGCATCGCG-0	B cell	B cell	880_49_33	unassigned	-0.671537	-1.51205
ACCGACTAGCTACAGC-0	Endothelial	Kupffer+MonoMac+Endothelial	880_32_54	NTC	4.42329	1.27163
ACCGACTAGGAATGAC-0	Kupffer	Kupffer+MonoMac+Endothelial	880_42_55	NTC	3.85753	0.203319
ACCGACTAGGTAGTAA-0	NK	NK	880_75_36	NTC	1.26411	0.476144
ACCGACTAGTTGCGGT-0	Neutrophil	Neutrophil	880_29_20	NTC	1.9036	-0.411963
ACCGAGGGTATAGTGG-0	DC	DC	880_50_62	NTC	-0.075681	-1.50902
ACCGAGGGTGGCTACC-0	Endothelial	Kupffer+MonoMac+Endothelial	880_54_41	NTC	1.16918	-1.16815
ACCGAGGGTTTGGTCG-0	CD8 T	CD8 T	880_36_72	Ifng	1.17125	0.614728
ACCGATTGTGATTCGT-0	Mono/Mac	Kupffer+MonoMac+Endothelial	880_21_46	unassigned	2.06649	0.308512
ACCGCAACAATCAATG-0	Kupffer	Kupffer+MonoMac+Endothelial	880_40_62	NTC	5.09053	0.966321
ACCGCAACATTAATCC-0	CD8 T	CD8 T	880_12_25	unassigned	-0.291093	-1.04041
ACCGCCAAGGTGCTTA-0	CD8 T	CD8 T	880_45_12	NTC	1.08449	0.516535
ACCGCCAAGTAGCTCA-0	B cell	B cell	880_46_68	unassigned	0.490941	-0.255823
ACCGCCAAGTGAGTCC-0	DC	DC	880_54_54	NTC	2.40082	0.80051
ACCGCCAAGTGCCATA-0	DC	DC	880_71_8	NTC	1.12062	-0.393377
ACCGCTAGTAGCTTAC-0	Mono/Mac	Kupffer+MonoMac+Endothelial	880_53_39	NTC	2.62717	0.790849
ACCGCTAGTGAAGCCG-0	Mono/Mac	Kupffer+MonoMac+Endothelial	880_50_39	unassigned	2.86114	0.992125
ACCGGATTCCCGTTGC-0	Endothelial	Kupffer+MonoMac+Endothelial	880_51_28	unassigned	0.592973	-1.60016
ACCGGCTGTGCGCAGA-0	CD8 T	CD8 T	880_65_43	NTC	-0.137158	-0.866184
ACCGGCTGTTTCGGTG-0	Endothelial	Kupffer+MonoMac+Endothelial	880_36_79	unassigned	2.56685	-0.120237
ACCGGTTAGGGTGATG-0	Kupffer	Kupffer+MonoMac+Endothelial	880_64_44	NTC	3.03657	-0.304708
ACCGTTGGTTAGAGCA-0	DC	DC	880_73_14	unassigned	1.22014	-0.300561
ACCTAACGTGCGCATC-0	Endothelial	Kupffer+MonoMac+Endothelial	880_12_47	unassigned	3.07257	0.258927
ACCTAACGTTACACTA-0	Endothelial	Kupffer+MonoMac+Endothelial	880_51_41	unassigned	0.678334	-1.53616
ACCTAAGTCTGGGAAG-0	CD8 T	CD8 T	880_15_21	unassigned	0.834788	0.233907
ACCTACTTCGTGATGC-0	Kupffer	Kupffer+MonoMac+Endothelial	880_18_76	NTC	3.48985	-0.0242134
ACCTATGAGTGCTGGT-0	Mono/Mac	Kupffer+MonoMac+Endothelial	880_36_25	NTC	1.14698	-0.48252
ACCTCCATCCATCCTG-0	CD4 T	CD4 T	880_51_75	unassigned	0.811429	0.18586
ACCTCCATCGATGAGG-0	DC	DC	880_0_31	unassigned	2.36941	0.771218
ACCTCCGCACTAGCAG-0	Mono/Mac	Kupffer+MonoMac+Endothelial	880_13_48	unassigned	1.0491	-0.566718
ACCTCGCTCATCAAGT-0	Kupffer	Kupffer+MonoMac+Endothelial	880_76_24	NTC	4.00017	0.291587
ACCTCGCTCGATCCGG-0	Endothelial	Kupffer+MonoMac+Endothelial	880_13_56	NTC	-1.30269	-3.02144
ACCTCGCTCTGGTCGG-0	DC	DC	880_77_38	unassigned	1.20296	-0.316588
ACCTCTTAGGAGTAGT-0	Endothelial	Kupffer+MonoMac+Endothelial	880_40_54	unassigned	4.82821	1.57522
ACCTCTTAGGTAGTGG-0	Mono/Mac	Kupffer+MonoMac+Endothelial	880_50_14	unassigned	1.27375	-0.373458
ACCTGATGTATGTACC-0	CD8 T	CD8 T	880_26_18	unassigned	1.18353	0.628628
ACCTGCCTCCAGATTG-0	Kupffer	Kupffer+MonoMac+Endothelial	880_41_28	NTC	5.34175	1.12178
ACCTTAAGTTTCGGGC-0	Mono/Mac	Kupffer+MonoMac+Endothelial	880_49_11	NTC	1.21727	-0.422051
ACGAACCTCCTGCGTC-0	DC	DC	880_48_55	Ifng	0.879083	-0.618625
ACGAACCTCTCATTCA-0	CD8 T	CD8 T	880_35_26	NTC	3.03456	2.7237
ACGAATGGTTGGTGCC-0	NK	NK	880_31_14	unassigned	1.6281	0.977666
ACGACAAGTAGTGACA-0	Mono/Mac	Kupffer+MonoMac+Endothelial	880_23_58	unassigned	3.59853	1.62648
ACGACATCACATAGAC-0	CD8 T	CD8 T	880_72_36	NTC	0.64707	0.0214401
ACGACATCATCGGGTA-0	CD8 T	CD8 T	880_49_56	NTC	0.717147	0.100756
ACGAGTAGTATGTCAC-0	Mono/Mac	Kupffer+MonoMac+Endothelial	880_23_71	NTC	2.83899	0.973072
ACGATAGGTAACTCTA-0	Kupffer	Kupffer+MonoMac+Endothelial	880_50_42	NTC	4.29897	0.476487
ACGATAGGTAAGCGTA-0	Endothelial	Kupffer+MonoMac+Endothelial	880_43_60	unassigned	2.68894	-0.0286981
ACGATAGGTAGCGCGA-0	Mono/Mac	Kupffer+MonoMac+Endothelial	880_61_12	NTC	2.06337	0.305829
ACGATGGAGCAACCTA-0	Endothelial	Kupffer+MonoMac+Endothelial	880_65_48	unassigned	1.44019	-0.964957
ACGATGGAGCAAGTCC-0	Mono/Mac	Kupffer+MonoMac+Endothelial	880_49_25	NTC	0.966862	-0.637467
ACGATGGAGCTATCCT-0	Endothelial	Kupffer+MonoMac+Endothelial	880_36_68	unassigned	4.46545	1.30324
ACGATGGAGCTATGAT-0	CD8 T	CD8 T	880_14_70	unassigned	0.290023	-0.382682
ACGATTGTCAGCCAAC-0	Endothelial	Kupffer+MonoMac+Endothelial	880_55_52	NTC	2.0712	-0.491851
ACGCAATCAAATCTAG-0	NK	NK	880_37_57	unassigned	0.563401	-0.48933
ACGCAATCAATCGCTC-0	DC	DC	880_54_31	unassigned	0.519464	-0.953997
ACGCAATCATAAGCGT-0	DC	DC	880_43_47	unassigned	1.5221	-0.0189639
ACGCACTAGATAGCGG-0	Endothelial	Kupffer+MonoMac+Endothelial	880_3_67	unassigned	1.36349	-1.02246
ACGCAGCCAATTGGCG-0	B cell	B cell	880_8_58	unassigned	0.382466	-0.373046
ACGCAGCCAGGACATT-0	Kupffer	Kupffer+MonoMac+Endothelial	880_23_46	unassigned	2.65611	-0.540149
ACGCATATCAATCCTC-0	CD8 T	CD8 T	880_69_40	NTC	0.903915	0.312149
ACGCATTGTCAGCTCA-0	Kupffer	Kupffer+MonoMac+Endothelial	880_32_67	unassigned	4.13128	0.372717
ACGCATTGTGAGACTA-0	Kupffer	Kupffer+MonoMac+Endothelial	880_54_42	NTC	2.79065	-0.45689
ACGCCATAGCAGGTTC-0	Kupffer	Kupffer+MonoMac+Endothelial	880_56_17	NTC	2.29878	-0.761271
ACGCCCAAGGGTACTC-0	Kupffer	Kupffer+MonoMac+Endothelial	880_48_36	NTC	5.50662	1.22381
ACGCCTAGTAATGAAC-0	Kupffer	Kupffer+MonoMac+Endothelial	880_42_18	unassigned	0.557895	-1.83856
ACGCCTAGTATGTGAG-0	Treg	Treg	880_54_59	NTC	0.281255	-0.602048
ACGCCTAGTTAGCTCG-0	Mono/Mac	Kupffer+MonoMac+Endothelial	880_41_17	unassigned	0.73523	-0.836732
ACGCGAAAGCGCCATG-0	Kupffer	Kupffer+MonoMac+Endothelial	880_60_9	unassigned	2.42204	-0.684992
ACGCGAAAGGATGTCC-0	Endothelial	Kupffer+MonoMac+Endothelial	880_49_72	unassigned	1.8093	-0.688212
ACGCGAAAGGCTATAT-0	Mono/Mac	Kupffer+MonoMac+Endothelial	880_40_63	NTC	1.08584	-0.53511
ACGCGAAAGTTGCACA-0	Kupffer	Kupffer+MonoMac+Endothelial	880_14_68	unassigned	6.39103	1.7711
ACGCGAGGTCATGGCC-0	Endothelial	Kupffer+MonoMac+Endothelial	880_56_44	NTC	1.25867	-1.10105
ACGCGAGGTCTGTGGC-0	Mono/Mac	Kupffer+MonoMac+Endothelial	880_64_7	unassigned	3.34033	1.40436
ACGCGAGGTTGGATCT-0	Mono/Mac	Kupffer+MonoMac+Endothelial	880_26_47	NTC	-0.136924	-1.58702
ACGCGATTCTGGAACC-0	CD8 T	CD8 T	880_0_54	unassigned	-0.268331	-1.01465
ACGCGGTCAATGAGTC-0	Endothelial	Kupffer+MonoMac+Endothelial	880_24_63	Ifng	4.97452	1.68492
ACGCGGTCACATAGGT-0	CD8 T	CD8 T	880_53_17	NTC	0.445515	-0.206689
ACGCGGTCACTATCCA-0	Endothelial	Kupffer+MonoMac+Endothelial	880_66_36	unassigned	3.84642	0.839125
ACGCGGTCATTCATCG-0	Endothelial	Kupffer+MonoMac+Endothelial	880_62_57	unassigned	3.51364	0.58962
ACGCTAATCGTCTCAT-0	CD8 T	CD8 T	880_66_9	unassigned	0.337776	-0.328633
ACGCTATGTGAGACGT-0	CD8 T	CD8 T	880_47_58	unassigned	0.534017	-0.106518
ACGCTATGTGGCAGTG-0	Mono/Mac	Kupffer+MonoMac+Endothelial	880_34_77	NTC	2.57762	0.748224
ACGCTGACACCTATAT-0	NK	NK	880_67_24	NTC	0.31082	-0.83735
ACGCTTGGTCAGTCGC-0	Endothelial	Kupffer+MonoMac+Endothelial	880_63_8	unassigned	2.47279	-0.19076
ACGCTTGGTGAGGAGA-0	Kupffer	Kupffer+MonoMac+Endothelial	880_52_40	unassigned	6.66873	1.94295
ACGCTTGGTTTGGTGT-0	Mono/Mac	Kupffer+MonoMac+Endothelial	880_16_59	unassigned	1.6146	-0.0802338
ACGGACAAGTCAGCTA-0	Endothelial	Kupffer+MonoMac+Endothelial	880_54_24	unassigned	2.407	-0.240087
ACGGACCCAGCTCATC-0	Endothelial	Kupffer+MonoMac+Endothelial	880_28_76	NTC	2.24693	-0.360102
ACGGAGGCATTACGCC-0	CD8 T	CD8 T	880_50_60	NTC	0.804283	0.19938
ACGGATAGTTGCGGAG-0	Mono/Mac	Kupffer+MonoMac+Endothelial	880_35_58	NTC	2.76998	0.913701
ACGGATTCACTCGCCA-0	CD8 T	CD8 T	880_39_64	NTC	0.269799	-0.405572
ACGGCAAAGGATGACG-0	Neutrophil	Neutrophil	880_65_42	NTC	2.71324	0.139027
ACGGCAAAGGTTGGCT-0	DC	DC	880_29_24	NTC	1.03755	-0.470838
ACGGCAAAGTCATCTC-0	CD8 T	CD8 T	880_11_70	unassigned	0.10315	-0.594193
ACGGCACCAAGGGTCC-0	CD8 T	CD8 T	880_50_73	unassigned	0.697841	0.0789045
ACGGCACCAAGTAGCT-0	Kupffer	Kupffer+MonoMac+Endothelial	880_69_16	unassigned	5.18059	1.02205
ACGGCAGGTTCGTCCT-0	Endothelial	Kupffer+MonoMac+Endothelial	880_43_55	NTC	1.55752	-0.876988
ACGGCTTAGGCATTCA-0	Hepatocyte	Hepatocyte	880_50_73	unassigned	2.19468	-0.115804
ACGGGATGTTGCGATT-0	B cell	B cell	880_71_10	unassigned	-0.41492	-1.23473
ACGGGCAGTCAAGGGT-0	Mono/Mac	Kupffer+MonoMac+Endothelial	880_43_56	NTC	1.33915	-0.317195
ACGGGCTCAACTACGG-0	Endothelial	Kupffer+MonoMac+Endothelial	880_36_57	unassigned	3.24076	0.385029
ACGGGGACAACGGCTA-0	Kupffer	Kupffer+MonoMac+Endothelial	880_49_13	NTC	4.65711	0.69811
ACGGGGACAGTACCGA-0	Mono/Mac	Kupffer+MonoMac+Endothelial	880_32_67	unassigned	1.85311	0.124949
ACGGGGTAGCAAGTCC-0	Kupffer	Kupffer+MonoMac+Endothelial	880_43_41	NTC	1.52793	-1.23829
ACGGGGTAGCAGTTCA-0	CD8 T	CD8 T	880_79_13	NTC	0.839292	0.239005
ACGGGTAAGTACGGCT-0	DC	DC	880_37_42	unassigned	0.822128	-0.671739
ACGGGTAAGTAGGTCC-0	pDC	pDC	880_54_26	NTC	1.73267	1.56152
ACGGGTTTCAATCCGA-0	Mono/Mac	Kupffer+MonoMac+Endothelial	880_35_22	unassigned	1.14218	-0.48665
ACGGGTTTCCGTAGTA-0	Mono/Mac	Kupffer+MonoMac+Endothelial	880_35_30	NTC	1.29908	-0.351673
ACGGGTTTCGCGCACA-0	pDC	pDC	880_54_70	unassigned	-0.625717	-1.36624
ACGGTCACAATCAATG-0	Mono/Mac	Kupffer+MonoMac+Endothelial	880_40_47	unassigned	1.27543	-0.372017
ACGGTTATCTCATCGT-0	Mono/Mac	Kupffer+MonoMac+Endothelial	880_27_27	unassigned	2.34001	0.543809
ACGGTTGCATTCCTCT-0	Endothelial	Kupffer+MonoMac+Endothelial	880_23_64	unassigned	1.84395	-0.662236
ACGTAACCAACTGGTG-0	DC	DC	880_1_73	unassigned	1.71335	0.159394
ACGTAACCAGGTTCGA-0	Endothelial	Kupffer+MonoMac+Endothelial	880_9_73	NTC	3.63908	0.683669
ACGTAACCATGCAGAT-0	Kupffer	Kupffer+MonoMac+Endothelial	880_71_34	NTC	0.750098	-1.71963
ACGTAACCATTAGGGT-0	NK	NK	880_52_32	NTC	1.46884	0.758227
ACGTATTAGATTGACT-0	CD8 T	CD8 T	880_66_36	unassigned	1.03817	0.4641
ACGTATTAGTGCCTGG-0	Endothelial	Kupffer+MonoMac+Endothelial	880_12_52	unassigned	1.21846	-1.1312
ACGTCAATCAGGAAGT-0	Endothelial	Kupffer+MonoMac+Endothelial	880_53_21	NTC	3.64961	0.691563
ACGTCACAGGCAATGG-0	CD8 T	CD8 T	880_29_19	unassigned	0.845227	0.245723
ACGTCACAGGGCTACT-0	Kupffer	Kupffer+MonoMac+Endothelial	880_37_31	unassigned	3.16253	-0.226763
ACGTCCCTCATGAGTT-0	Kupffer	Kupffer+MonoMac+Endothelial	880_73_14	unassigned	5.15466	1.00601
ACGTCCCTCGAACGAG-0	Endothelial	Kupffer+MonoMac+Endothelial	880_48_57	NTC	1.4336	-0.969892
ACGTCCCTCTGGATAT-0	Cholangiocyte	Cholangiocyte	880_47_14	unassigned	0.531399
ACGTCCTCATAACGTA-0	Mono/Mac	Kupffer+MonoMac+Endothelial	880_32_24	NTC	3.09601	1.19418
ACGTCCTCATGACTCC-0	Mono/Mac	Kupffer+MonoMac+Endothelial	880_5_61	unassigned	2.98789	1.10116
ACGTCTAAGCCGCGTA-0	CD8 T	CD8 T	880_45_70	NTC	-0.537777	-1.31962
ACGTCTAAGCGAGCTT-0	Endothelial	Kupffer+MonoMac+Endothelial	880_26_51	NTC	3.80204	0.80585
ACGTCTAAGGGCAGGT-0	Mono/Mac	Kupffer+MonoMac+Endothelial	880_33_52	NTC	2.03566	0.281989
ACGTGAGAGCAACCTA-0	CD8 T	CD8 T	880_30_14	unassigned	-0.89929	-1.7288
ACGTGAGAGCTAGCAC-0	Kupffer	Kupffer+MonoMac+Endothelial	880_75_23	unassigned	2.1803	-0.834589
ACGTTAACAAGCACGC-0	CD8 T	CD8 T	880_48_75	unassigned	0.435191	-0.218375
ACGTTAACACAGCACA-0	Endothelial	Kupffer+MonoMac+Endothelial	880_42_54	NTC	1.20204	-1.14351
ACGTTAGTCATGGCTA-0	CD8 T	CD8 T	880_12_51	unassigned	0.288103	-0.384855
ACGTTAGTCCCGGCTT-0	B cell	B cell	880_46_30	NTC	0.375479	-0.380596
ACGTTAGTCTAACCAG-0	Endothelial	Kupffer+MonoMac+Endothelial	880_50_56	NTC	0.808845	-1.43831
ACGTTATAGGTATATC-0	pDC	pDC	880_1_73	unassigned	1.47316	1.23936
ACGTTATAGTAGTCTG-0	Mono/Mac	Kupffer+MonoMac+Endothelial	880_64_13	unassigned	1.53531	-0.148446
ACGTTATAGTCGATCA-0	CD8 T	CD8 T	880_23_51	unassigned	0.625235	-0.00327469
ACGTTCAAGGATTCGC-0	Mono/Mac	Kupffer+MonoMac+Endothelial	880_50_16	NTC	0.882425	-0.710105
ACGTTCAAGTCAAGGG-0	DC	DC	880_0_76	unassigned	0.584069	-0.893747
ACGTTCCCAAAGGATG-0	CD8 T	CD8 T	880_51_64	NTC	-0.0259969	-0.740367
ACGTTCCCAAGGGACG-0	Endothelial	Kupffer+MonoMac+Endothelial	880_37_48	NTC	4.33414	1.20479
ACGTTCCCAAGTGCAT-0	CD8 T	CD8 T	880_34_51	unassigned	-0.463912	-1.23602
ACGTTTAGTCAGTCGC-0	Mono/Mac	Kupffer+MonoMac+Endothelial	880_26_21	NTC	2.39445	0.590641
ACGTTTAGTGAACCAA-0	CD8 T	CD8 T	880_51_14	unassigned	1.06159	0.490617
ACTAACTAGAATCCGC-0	Endothelial	Kupffer+MonoMac+Endothelial	880_43_56	NTC	2.58708	-0.105068
ACTAACTAGCTAGGGA-0	DC	DC	880_17_79	NTC	0.453077	-1.01591
ACTAACTAGGATGTAA-0	Kupffer	Kupffer+MonoMac+Endothelial	880_62_47	unassigned	-0.452544	-2.46384
ACTAAGCCAAACTTGA-0	Mono/Mac	Kupffer+MonoMac+Endothelial	880_53_39	NTC	1.11866	-0.506878
ACTAAGCCAGGGCACT-0	Mono/Mac	Kupffer+MonoMac+Endothelial	880_57_46	NTC	1.88788	0.154859
ACTAAGGGTAGCCTGC-0	Neutrophil	Neutrophil	880_56_38	NTC	0.460933	-1.39375
ACTAAGGGTTTACGAC-0	Kupffer	Kupffer+MonoMac+Endothelial	880_10_68	unassigned	1.58873	-1.20066
ACTAATGCATCGCGTT-0	DC	DC	880_28_26	unassigned	-0.443303	-1.85185
ACTAATGCATCGTTGC-0	Endothelial	Kupffer+MonoMac+Endothelial	880_20_70	unassigned	3.36949	0.481543
ACTACAACAACCAGGC-0	Endothelial	Kupffer+MonoMac+Endothelial	880_47_69	unassigned	2.26087	-0.349645
ACTACAACAATCCTCA-0	CD8 T	CD8 T	880_76_21	unassigned	-0.206718	-0.944915
ACTACCAAGGTCAAGG-0	Mono/Mac	Kupffer+MonoMac+Endothelial	880_21_63	unassigned	0.641417	-0.917437
ACTACCAAGGTGCGAA-0	Kupffer	Kupffer+MonoMac+Endothelial	880_30_22	NTC	4.05394	0.324861
ACTACCTTCCCTCAGC-0	CD8 T	CD8 T	880_51_23	unassigned	0.0203074	-0.687958
ACTACCTTCGATGAGG-0	DC	DC	880_0_63	NTC	0.808855	-0.684118
ACTACTTCAACCGTCT-0	Mono/Mac	Kupffer+MonoMac+Endothelial	880_60_39	NTC	2.2537	0.469562
ACTACTTCACTAATCT-0	Neutrophil	Neutrophil	880_55_55	NTC	0.949089	-1.06154
ACTATCAGTGAGATCA-0	Endothelial	Kupffer+MonoMac+Endothelial	880_24_72	unassigned	2.4973	-0.17238
ACTATCCTCAGGAAGT-0	Kupffer	Kupffer+MonoMac+Endothelial	880_54_62	NTC	3.15795	-0.229597
ACTATCCTCCTTGGAA-0	DC	DC	880_74_4	unassigned	1.67133	0.120208
ACTATCCTCGATTAGT-0	Treg	Treg	880_0_60	unassigned	0.769509	-0.124087
ACTATCTCAACGGCTA-0	Mono/Mac	Kupffer+MonoMac+Endothelial	880_40_10	unassigned	0.416234	-1.11116
ACTATCTCACAGGGCT-0	Mono/Mac	Kupffer+MonoMac+Endothelial	880_51_28	unassigned	1.149	-0.480782
ACTATCTCAGCACTCT-0	Endothelial	Kupffer+MonoMac+Endothelial	880_50_21	unassigned	2.42809	-0.224275
ACTATCTCAGGGACCT-0	DC	DC	880_14_68	unassigned	1.05531	-0.454278
ACTATTCCAAGTAGTC-0	DC	DC	880_30_51	NTC	1.16788	-0.3493
ACTATTCCAGCTACTC-0	Endothelial	Kupffer+MonoMac+Endothelial	880_71_8	NTC	3.77761	0.787534
ACTATTGGTGACGACG-0	Endothelial	Kupffer+MonoMac+Endothelial	880_35_18	NTC	3.11059	0.28743
ACTCAATAGGTCGAGA-0	Mono/Mac	Kupffer+MonoMac+Endothelial	880_59_52	unassigned	2.46355	0.650085
ACTCAATAGTCGCAGT-0	DC	DC	880_20_47	unassigned	1.58131	0.0362548
ACTCAGGCATTACAGA-0	Mono/Mac	Kupffer+MonoMac+Endothelial	880_29_78	NTC	1.28341	-0.365153
ACTCATTCAATTCACT-0	CD8 T	CD8 T	880_32_36	Ifng	0.521778	-0.120371
ACTCATTCAGCTCTAC-0	Mono/Mac	Kupffer+MonoMac+Endothelial	880_67_32	NTC	2.27315	0.486292
ACTCATTCATCGCTTA-0	Mono/Mac	Kupffer+MonoMac+Endothelial	880_25_24	NTC	-0.995141	-2.32532
ACTCCAAAGGTGCAAG-0	Endothelial	Kupffer+MonoMac+Endothelial	880_78_23	NTC	3.5502	0.617032
ACTCCACCACTTGAGG-0	CD8 T	CD8 T	880_4_23	unassigned	0.858378	0.260608
ACTCCACCATCCGTCG-0	NK	NK	880_31_14	unassigned	0.759706	-0.21885
ACTCCCGCACTTCGTA-0	Treg	Treg	880_65_44	NTC	1.64025	0.728294
ACTCCCGCATCACGTC-0	Mono/Mac	Kupffer+MonoMac+Endothelial	880_39_57	NTC	1.58361	-0.106901
ACTCCCTGTCAGCTCA-0	DC	DC	880_18_21	NTC	0.924544	-0.576229
ACTCCGCTCAGCGAGA-0	DC	DC	880_41_64	NTC	1.22381	-0.297142
ACTCCGCTCGATTACG-0	CD8 T	CD8 T	880_50_68	unassigned	0.455404	-0.195496
ACTCCGCTCGCGTTAA-0	CD8 T	CD8 T	880_75_51	unassigned	-0.20591	-0.944001
ACTCCTTAGGAACCAG-0	Kupffer	Kupffer+MonoMac+Endothelial	880_18_20	unassigned	5.14352	0.999115
ACTCCTTAGTAACCGC-0	Mono/Mac	Kupffer+MonoMac+Endothelial	880_20_60	unassigned	0.652189	-0.90817
ACTCCTTAGTAGGCTC-0	Endothelial	Kupffer+MonoMac+Endothelial	880_58_12	NTC	2.03332	-0.520256
ACTCGAATCAGGTAGG-0	NK	NK	880_8_68	NTC	0.301294	-0.850475
ACTCGAATCCTCACAT-0	Endothelial	Kupffer+MonoMac+Endothelial	880_6_48	unassigned	2.02635	-0.525483
ACTCGCCTCAGGAGCA-0	DC	DC	880_2_19	NTC	1.39263	-0.139701
ACTCGTCCAGTTAATG-0	Neutrophil	Neutrophil	880_60_47	unassigned	2.70007	0.130061
ACTCGTTTCTAATGAC-0	NK	NK	880_36_29	unassigned	0.787833	-0.180095
ACTCTAAGTTGAGGAC-0	B cell	B cell	880_37_49	NTC	-0.743746	-1.59008
ACTCTCACACTTGCCG-0	Endothelial	Kupffer+MonoMac+Endothelial	880_30_59	NTC	6.64721	2.93902
ACTCTGTTCCCGTGAG-0	Endothelial	Kupffer+MonoMac+Endothelial	880_54_53	unassigned	5.19396	1.84945
ACTCTGTTCGCGATTA-0	DC	DC	880_5_77	unassigned	1.38425	-0.147521
ACTCTTGCACAGCGTA-0	Kupffer	Kupffer+MonoMac+Endothelial	880_37_24	NTC	1.83801	-1.0464
ACTCTTGCATTCAACT-0	Endothelial	Kupffer+MonoMac+Endothelial	880_55_32	unassigned	-0.761412	-2.61561
ACTGAAGGTAGCGATA-0	NK	NK	880_25_24	NTC	1.08717	0.232343
ACTGAGGAGGAGGATT-0	B cell	B cell	880_1_72	NTC	0.00773823	-0.777992
ACTGAGGAGGGCTTAC-0	Endothelial	Kupffer+MonoMac+Endothelial	880_57_21	unassigned	3.7091	0.736167
ACTGATTAGGTACTGC-0	Mono/Mac	Kupffer+MonoMac+Endothelial	880_36_53	NTC	-0.379004	-1.79527
ACTGCATGTATGTGGA-0	Endothelial	Kupffer+MonoMac+Endothelial	880_30_71	NTC	2.9219	0.145962
ACTGCATGTCAATCCG-0	CD8 T	CD8 T	880_51_33	unassigned	0.107638	-0.589113
ACTGCATGTCTAGTAC-0	Endothelial	Kupffer+MonoMac+Endothelial	880_49_14	unassigned	4.23333	1.12921
ACTGCATGTTCTGGGC-0	Mono/Mac	Kupffer+MonoMac+Endothelial	880_23_44	unassigned	2.13713	0.36928
ACTGCCCTCATCACGA-0	DC	DC	880_57_57	unassigned	1.56651	0.0224575
ACTGCCCTCTAGATAC-0	Mono/Mac	Kupffer+MonoMac+Endothelial	880_55_64	unassigned	3.05965	1.1629
ACTGCCCTCTGGATCA-0	Endothelial	Kupffer+MonoMac+Endothelial	880_9_69	unassigned	5.90015	2.37891
ACTGCGCGTCAGCCGT-0	NK	NK	880_37_53	NTC	1.0739	0.214071
ACTGCGCGTTAGCAGA-0	Endothelial	Kupffer+MonoMac+Endothelial	880_30_65	unassigned	0.391307	-1.75136
ACTGCTAAGCGGGATA-0	Mono/Mac	Kupffer+MonoMac+Endothelial	880_4_34	unassigned	1.48868	-0.188567
ACTGGGTTCCGGGTCA-0	DC	DC	880_21_21	unassigned	0.421232	-1.04561
ACTGGGTTCTATGCAG-0	Kupffer	Kupffer+MonoMac+Endothelial	880_40_44	unassigned	2.48785	-0.644269
ACTGTCAAGTAGTCTG-0	NKT	NKT	880_49_25	NTC	0.0158193	-0.749862
ACTGTTAGTAAGCAAT-0	Endothelial	Kupffer+MonoMac+Endothelial	880_49_52	NTC	2.86963	0.10677
ACTGTTGAGCCATGCG-0	CD8 T	CD8 T	880_23_51	unassigned	0.195167	-0.490044
ACTGTTGAGCCGCATG-0	DC	DC	880_16_66	unassigned	0.95392	-0.548834
ACTTAACAGGATATGA-0	Endothelial	Kupffer+MonoMac+Endothelial	880_43_69	NTC	3.83903	0.833579
ACTTAACAGGCTCTCC-0	Mono/Mac	Kupffer+MonoMac+Endothelial	880_57_45	NTC	2.68766	0.842884
ACTTACCTCAATCGGC-0	Kupffer	Kupffer+MonoMac+Endothelial	880_5_74	NTC	2.05778	-0.910407
ACTTACCTCCGGTTCC-0	Treg	Treg	880_49_26	NTC	1.58202	0.671292
ACTTACCTCGTAGTGC-0	Kupffer	Kupffer+MonoMac+Endothelial	880_69_54	NTC	1.48821	-1.26287
ACTTACTCAACATGCG-0	Endothelial	Kupffer+MonoMac+Endothelial	880_42_31	unassigned	4.53147	1.35274
ACTTAGGTCCGGGTAT-0	Neutrophil	Neutrophil	880_23_13	unassigned	0.856583	-1.12449
ACTTAGGTCTAAGCTG-0	Mono/Mac	Kupffer+MonoMac+Endothelial	880_77_28	NTC	0.564626	-0.983498
ACTTAGGTCTCACATC-0	CD8 T	CD8 T	880_32_65	unassigned	-0.230375	-0.971691
ACTTATGGTCCATAGT-0	CD8 T	CD8 T	880_0_22	unassigned	0.757784	0.146751
ACTTATGGTTGCGACC-0	Kupffer	Kupffer+MonoMac+Endothelial	880_76_44	NTC	0.876733	-1.64126
ACTTATGGTTTCCTCA-0	Kupffer	Kupffer+MonoMac+Endothelial	880_21_21	unassigned	3.0546	-0.29355
ACTTCATCACATGAGT-0	Mono/Mac	Kupffer+MonoMac+Endothelial	880_44_19	NTC	3.04579	1.15097
ACTTGAGTCAGTATGT-0	CD8 T	CD8 T	880_46_75	unassigned	0.992826	0.412782
ACTTGAGTCGCGAGTT-0	Endothelial	Kupffer+MonoMac+Endothelial	880_54_54	NTC	0.859476	-1.40035
ACTTGGGCAATAGCCG-0	Mono/Mac	Kupffer+MonoMac+Endothelial	880_67_22	unassigned	2.91815	1.04116
ACTTGGGCAGCTCACT-0	Endothelial	Kupffer+MonoMac+Endothelial	880_52_66	unassigned	2.84625	0.0892397
ACTTGGGCAGCTCGTT-0	Mono/Mac	Kupffer+MonoMac+Endothelial	880_66_5	unassigned	0.705196	-0.86257
ACTTGGGCATTCAGCC-0	Kupffer	Kupffer+MonoMac+Endothelial	880_52_62	NTC	2.48223	-0.647744
ACTTGTGAGCAATCTG-0	Kupffer	Kupffer+MonoMac+Endothelial	880_16_69	unassigned	2.84692	-0.422067
ACTTTCATCAGGACGA-0	Mono/Mac	Kupffer+MonoMac+Endothelial	880_19_61	unassigned	0.222881	-1.27749
ACTTTCATCCGTAGAC-0	CD8 T	CD8 T	880_20_23	NTC	0.494657	-0.151068
ACTTTCATCGTGCTAA-0	Kupffer	Kupffer+MonoMac+Endothelial	880_30_58	NTC	4.37222	0.521815
ACTTTCGCAAGCATTA-0	Endothelial	Kupffer+MonoMac+Endothelial	880_16_78	NTC	1.68652	-0.780267
ACTTTCGCATCCCATA-0	CD4 T	CD4 T	880_0_61	unassigned	0.381476	-0.300185
ACTTTGAGTAGTCATC-0	Mono/Mac	Kupffer+MonoMac+Endothelial	880_42_44	unassigned	0.937811	-0.662458
ACTTTGAGTAGTGTCT-0	DC	DC	880_19_53	unassigned	1.05968	-0.450202
ACTTTGAGTTAAGCCT-0	Mono/Mac	Kupffer+MonoMac+Endothelial	880_37_24	NTC	1.74502	0.0319582
ACTTTGCTCCAGGTGT-0	Kupffer	Kupffer+MonoMac+Endothelial	880_68_16	unassigned	4.34199	0.503112
ACTTTGGAGGAGCTGA-0	Mono/Mac	Kupffer+MonoMac+Endothelial	880_51_16	NTC	2.21492	0.436203
ACTTTGGAGGGGATCA-0	DC	DC	880_61_53	unassigned	2.49478	0.888137
ACTTTGGAGGTACGGA-0	B cell	B cell	880_45_59	unassigned	1.23553	0.548808
AGAAGGTTCGACTACA-0	B cell	B cell	880_40_69	unassigned	0.173837	-0.598499
AGAAGGTTCTAGTCTC-0	CD8 T	CD8 T	880_77_28	NTC	1.64401	1.14982
AGAAGTTGTAATCACC-0	CD8 T	CD8 T	880_60_55	Ifng	0.718118	0.101855
AGAAGTTGTCTAGGTT-0	Mono/Mac	Kupffer+MonoMac+Endothelial	880_34_77	NTC	5.42295	3.19597
AGAATCAAGCGCAACT-0	Kupffer	Kupffer+MonoMac+Endothelial	880_27_53	unassigned	5.78983	1.39907
AGACAACAGTAAGGCG-0	CD8 T	CD8 T	880_63_27	NTC	0.661335	0.0375853
AGACACAGTTTCGAGT-0	Endothelial	Kupffer+MonoMac+Endothelial	880_54_41	NTC	0.285426	-1.83074
AGACAGACAAGCTCGA-0	Mono/Mac	Kupffer+MonoMac+Endothelial	880_37_24	NTC	1.35934	-0.299829
AGACAGACAAGTAACC-0	CD8 T	CD8 T	880_64_44	NTC	0.375298	-0.286164
AGACATAAGCCAGTCG-0	NKT	NKT	880_59_15	NTC	0.395072	-0.0863092
AGACATCCACAGGGCT-0	Kupffer	Kupffer+MonoMac+Endothelial	880_44_31	NTC	3.23863	-0.179671
AGACATGGTGATCCTG-0	Endothelial	Kupffer+MonoMac+Endothelial	880_55_25	unassigned	2.51056	-0.162443
AGACATGGTTCCGTCT-0	CD8 T	CD8 T	880_39_17	NTC	0.575413	-0.0596645
AGACATGGTTGCGCTA-0	Endothelial	Kupffer+MonoMac+Endothelial	880_48_52	NTC	4.17191	1.08316
AGACGAACATTACCCA-0	Endothelial	Kupffer+MonoMac+Endothelial	880_51_55	NTC	2.77172	0.0333651
AGACGATAGCATTACG-0	pDC	pDC	880_21_58	unassigned	0.094789	-0.471786
AGACGATAGTAATTGC-0	Endothelial	Kupffer+MonoMac+Endothelial	880_31_67	unassigned	2.91071	0.137568
AGACGGATCAGGTCCG-0	Mono/Mac	Kupffer+MonoMac+Endothelial	880_53_57	NTC	1.31832	-0.335116
AGACGGATCGCATGGT-0	Endothelial	Kupffer+MonoMac+Endothelial	880_30_13	NTC	1.43086	-0.971952
AGACGGATCGCGCTAG-0	Endothelial	Kupffer+MonoMac+Endothelial	880_54_20	Ifng	0.461764	-1.69853
AGACGGGCAGTTGAGT-0	Mono/Mac	Kupffer+MonoMac+Endothelial	880_53_24	Ifng	0.264516	-1.24167
AGACGTAGTATGTGTC-0	DC	DC	880_30_21	NTC	0.463122	-1.00654
AGACTGCTCGACTGAC-0	Mono/Mac	Kupffer+MonoMac+Endothelial	880_60_35	unassigned	1.48428	-0.192349
AGACTTACAAGCCAGC-0	Kupffer	Kupffer+MonoMac+Endothelial	880_66_28	NTC	0.933571	-1.60609
AGACTTACAATGTCGG-0	B cell	B cell	880_78_19	NTC	0.159009	-0.614523
AGACTTACAATTCGCC-0	Endothelial	Kupffer+MonoMac+Endothelial	880_53_64	NTC	0.207544	-1.88913
AGAGACCGTAGTCATC-0	Mono/Mac	Kupffer+MonoMac+Endothelial	880_48_18	unassigned	1.85453	0.126171
AGAGACCGTTAGACCT-0	Kupffer	Kupffer+MonoMac+Endothelial	880_13_58	NTC	2.53451	-0.615395
AGAGACTAGCCAGCAT-0	Mono/Mac	Kupffer+MonoMac+Endothelial	880_40_57	NTC	1.93191	0.192735
AGAGACTAGCGGATCT-0	CD8 T	CD8 T	880_18_75	NTC	1.62859	1.13236
AGAGAGAAGATAGCCC-0	Kupffer	Kupffer+MonoMac+Endothelial	880_15_36	unassigned	-0.0313703	-2.20321
AGAGAGGGTGACTCCA-0	CD8 T	CD8 T	880_48_64	unassigned	0.313671	-0.355916
AGAGAGGGTTAACCAC-0	Kupffer	Kupffer+MonoMac+Endothelial	880_68_13	unassigned	5.8216	1.41872
AGAGATGCAAAGGGAC-0	Endothelial	Kupffer+MonoMac+Endothelial	880_28_27	NTC	2.32141	-0.304255
AGAGATTGTGAGACTA-0	CD8 T	CD8 T	880_38_25	NTC	0.413464	-0.242966
AGAGATTGTGATGCGG-0	NK	NK	880_43_72	Ifng	0.983362	0.0893162
AGAGATTGTTAGGCTT-0	DC	DC	880_47_53	NTC	1.91671	0.349037
AGAGATTGTTCGGTCA-0	Mono/Mac	Kupffer+MonoMac+Endothelial	880_51_71	unassigned	1.02947	-0.583605
AGAGGAGGTTGTGCAT-0	DC	DC	880_39_70	unassigned	2.68432	1.0649
AGAGGCATCTAGATAC-0	Mono/Mac	Kupffer+MonoMac+Endothelial	880_13_22	NTC	3.76934	1.77342
AGAGGCGCAAGCCACA-0	pDC	pDC	880_40_73	NTC	-0.45889	-1.15914
AGAGGCGCACAGGCTA-0	B cell	B cell	880_64_16	NTC	1.70741	1.05875
AGAGGCGCACTAACGG-0	Endothelial	Kupffer+MonoMac+Endothelial	880_60_17	unassigned	1.95951	-0.575591
AGAGGGTCATCACGGA-0	Mono/Mac	Kupffer+MonoMac+Endothelial	880_14_79	NTC	2.08679	0.325975
AGAGGTTAGAATCGCC-0	Endothelial	Kupffer+MonoMac+Endothelial	880_46_18	unassigned	1.61098	-0.836902
AGAGGTTAGTAGTCAT-0	Kupffer	Kupffer+MonoMac+Endothelial	880_36_53	NTC	3.44255	-0.0534791
AGAGTAATCCATCTAC-0	Kupffer	Kupffer+MonoMac+Endothelial	880_69_27	unassigned	2.42123	-0.685496
AGAGTATGTGAGCGTG-0	Kupffer	Kupffer+MonoMac+Endothelial	880_1_62	unassigned	3.69988	0.105758
AGAGTATGTTCGCAAT-0	Mono/Mac	Kupffer+MonoMac+Endothelial	880_52_24	Ifng	2.84648	0.979516
AGAGTCAGTAATCCTA-0	Mono/Mac	Kupffer+MonoMac+Endothelial	880_51_31	NTC	1.50433	-0.175102
AGAGTCAGTTCGCACA-0	CD8 T	CD8 T	880_12_19	NTC	0.171999	-0.516267
AGAGTCCTCCTGAGCG-0	NKT	NKT	880_45_30	NTC	-0.0580208	-0.879055
AGAGTTGGTGAGGAGA-0	Kupffer	Kupffer+MonoMac+Endothelial	880_48_16	Ifng	3.23434	-0.182324
AGAGTTGGTGCAGCGA-0	Kupffer	Kupffer+MonoMac+Endothelial	880_22_55	unassigned	2.38081	-0.71051
AGCAAATGTAGTAGCA-0	B cell	B cell	880_48_56	NTC	0.905081	0.191715
AGCAAATGTTCCTGTC-0	CD8 T	CD8 T	880_66_6	unassigned	-0.0429718	-0.75958
AGCAAATGTTGTAGTC-0	CD8 T	CD8 T	880_30_28	unassigned	-0.833572	-1.65442
AGCAATCCAAGTATGC-0	Kupffer	Kupffer+MonoMac+Endothelial	880_67_54	unassigned	5.33665	1.11862
AGCAATCCACAAGCAT-0	Mono/Mac	Kupffer+MonoMac+Endothelial	880_24_23	NTC	1.31056	-0.341794
AGCACCACAAGCTTAA-0	Mono/Mac	Kupffer+MonoMac+Endothelial	880_16_62	unassigned	1.96456	0.220819
AGCACCACACCTATCA-0	Endothelial	Kupffer+MonoMac+Endothelial	880_69_36	Ifng	0.912821	-1.36035
AGCACCACAGGTAGCC-0	Mono/Mac	Kupffer+MonoMac+Endothelial	880_57_13	NTC	2.80438	0.943295
AGCACGCCAAACCAGT-0	Mono/Mac	Kupffer+MonoMac+Endothelial	880_2_62	unassigned	0.110213	-1.37442
AGCACGCCAAGGTCGC-0	Erythrocytes	Erythrocytes	880_24_69	unassigned	-0.85169	-0.423712
AGCACGCCAGCACTGA-0	Mono/Mac	Kupffer+MonoMac+Endothelial	880_53_47	NTC	2.30669	0.51515
AGCACGTTCCATGCAA-0	Mono/Mac	Kupffer+MonoMac+Endothelial	880_30_19	unassigned	1.36335	-0.296379
AGCACTATCGCTGAGT-0	CD8 T	CD8 T	880_74_23	unassigned	0.329724	-0.337746
AGCAGCAAGCTATCAG-0	Endothelial	Kupffer+MonoMac+Endothelial	880_16_14	unassigned	2.96029	0.174745
AGCAGCAAGTGGCGTT-0	HPC	HPC	880_40_27	NTC	0.831456
AGCAGCAAGTTACGCA-0	CD8 T	CD8 T	880_37_19	NTC	0.650702	0.0255501
AGCATAGGTCATGTGT-0	Endothelial	Kupffer+MonoMac+Endothelial	880_52_33	unassigned	2.89166	0.12329
AGCATAGGTTAACCAC-0	CD8 T	CD8 T	880_29_19	unassigned	1.23325	0.684907
AGCATCATCAGTGCCG-0	CD8 T	CD8 T	880_30_19	unassigned	0.00692224	-0.703108
AGCATCGCATCACTCA-0	CD8 T	CD8 T	880_1_45	NTC	4.00736	3.82476
AGCATGAGTGGCTGCT-0	Mono/Mac	Kupffer+MonoMac+Endothelial	880_5_16	unassigned	1.15014	-0.479801
AGCATGAGTTGAATCC-0	DC	DC	880_16_66	unassigned	1.10897	-0.404241
AGCATTGTCTAGCTGA-0	Mono/Mac	Kupffer+MonoMac+Endothelial	880_14_19	NTC	2.97108	1.0867
AGCCACTAGTCAGTCA-0	CD8 T	CD8 T	880_1_45	NTC	3.40441	3.14232
AGCCAGCCAATCGCCT-0	Mono/Mac	Kupffer+MonoMac+Endothelial	880_58_40	NTC	1.61496	-0.0799234
AGCCATTGTCTAATGC-0	Endothelial	Kupffer+MonoMac+Endothelial	880_10_69	unassigned	2.66689	-0.0452317
AGCCCAACAGGCAACC-0	B cell	B cell	880_0_60	unassigned	0.863973	0.147291
AGCCCATAGGGTGACA-0	Kupffer	Kupffer+MonoMac+Endothelial	880_69_17	unassigned	4.71977	0.736889
AGCCCCTTCCGGTTAA-0	Treg	Treg	880_76_36	Ifng	0.805094	-0.0892521
AGCCCCTTCGTCTCGC-0	pDC	pDC	880_31_21	NTC	-0.0216139	-0.616292
AGCCCGATCAGCGACT-0	Mono/Mac	Kupffer+MonoMac+Endothelial	880_48_47	unassigned	0.343895	-1.17339
AGCCCGATCCAGATAT-0	Endothelial	Kupffer+MonoMac+Endothelial	880_33_32	unassigned	2.0254	-0.526192
AGCCCTAGTCTAATTG-0	NK	NK	880_2_77	NTC	0.885723	-0.0452169
AGCCCTAGTGCGATGG-0	Mono/Mac	Kupffer+MonoMac+Endothelial	880_54_45	unassigned	3.73233	1.74158
AGCCGAAAGATAGTGA-0	Kupffer	Kupffer+MonoMac+Endothelial	880_45_75	unassigned	3.47392	-0.0340683
AGCCGAAAGCATGTAT-0	DC	DC	880_40_28	NTC	2.05048	0.473793
AGCCGAAAGGGGATTG-0	Kupffer	Kupffer+MonoMac+Endothelial	880_66_37	unassigned	2.60241	-0.573377
AGCCGAAAGGTGACAG-0	DC	DC	880_52_76	NTC	3.09858	1.45122
AGCCGATTCACCCTGC-0	Treg	Treg	880_29_32	unassigned	0.281446	-0.601861
AGCCGATTCCCAATTC-0	Kupffer	Kupffer+MonoMac+Endothelial	880_26_69	NTC	1.52626	-1.23932
AGCCGATTCTGGCCGA-0	Endothelial	Kupffer+MonoMac+Endothelial	880_19_59	unassigned	2.48442	-0.182042
AGCCGTTAGTCATACG-0	CD8 T	CD8 T	880_24_66	unassigned	1.20475	0.652647
AGCCTCTCAGCCATTC-0	B cell	B cell	880_43_22	unassigned	0.266501	-0.498362
AGCCTGACAAATTACG-0	CD8 T	CD8 T	880_68_33	NTC	-0.252943	-0.997234
AGCCTGACAAGCTAGT-0	Kupffer	Kupffer+MonoMac+Endothelial	880_6_52	unassigned	1.64005	-1.16891
AGCCTGACAAGTATGC-0	Treg	Treg	880_11_54	unassigned	0.891708	-0.00446378
AGCCTGACAGTTGGAT-0	Kupffer	Kupffer+MonoMac+Endothelial	880_51_70	unassigned	2.95803	-0.353314
AGCCTGGTCATCTAGG-0	Kupffer	Kupffer+MonoMac+Endothelial	880_62_17	NTC	2.18898	-0.829215
AGCCTGGTCCCCAATT-0	Kupffer	Kupffer+MonoMac+Endothelial	880_54_11	unassigned	3.77026	0.14931
AGCCTGGTCGAACCGT-0	pDC	pDC	880_24_8	unassigned	1.60877	1.4077
AGCCTGGTCTAGTTCC-0	Kupffer	Kupffer+MonoMac+Endothelial	880_68_54	unassigned	3.31779	-0.130684
AGCCTTGGTAGCCCTA-0	Endothelial	Kupffer+MonoMac+Endothelial	880_33_18	unassigned	3.77511	0.785655
AGCCTTGGTAGTAACG-0	Endothelial	Kupffer+MonoMac+Endothelial	880_72_18	NTC	4.95379	1.66938
AGCCTTGGTGCAGCTC-0	CD8 T	CD8 T	880_34_77	NTC	0.587081	-0.046459
AGCCTTGGTGCGGACA-0	NKT	NKT	880_76_5	NTC	0.439519	-0.00854353
AGCCTTGGTTAGTACC-0	B cell	B cell	880_19_66	NTC	1.78108	1.13836
AGCGACAAGCATAGCC-0	Kupffer	Kupffer+MonoMac+Endothelial	880_52_55	unassigned	2.96277	-0.350378
AGCGACAAGGATGACG-0	Kupffer	Kupffer+MonoMac+Endothelial	880_3_59	unassigned	2.69521	-0.515948
AGCGACAAGGATTACT-0	Endothelial	Kupffer+MonoMac+Endothelial	880_33_61	unassigned	1.22158	-1.12886
AGCGAGGCAACTAGGT-0	B cell	B cell	880_23_28	unassigned	0.777016	0.053322
AGCGAGGCAACTTACT-0	NK	NK	880_51_67	unassigned	0.179779	-1.0179
AGCGAGGCACTAGTAA-0	Kupffer	Kupffer+MonoMac+Endothelial	880_1_70	NTC	2.99743	-0.328928
AGCGATAGTGATGACA-0	NK	NK	880_57_45	NTC	0.578077	-0.469108
AGCGATGAGCGCTGTG-0	Kupffer	Kupffer+MonoMac+Endothelial	880_54_54	NTC	2.62777	-0.557687
AGCGATTCAACTTCGC-0	CD8 T	CD8 T	880_34_36	unassigned	-0.213794	-0.952924
AGCGCACCAAATTCGA-0	CD8 T	CD8 T	880_65_11	unassigned	2.08291	1.64659
AGCGCACCATGACAGT-0	DC	DC	880_71_18	NTC	0.296934	-1.16152
AGCGCATTCGCATTAG-0	Kupffer	Kupffer+MonoMac+Endothelial	880_36_12	NTC	2.57214	-0.592109
AGCGCATTCTAAGCCA-0	Endothelial	Kupffer+MonoMac+Endothelial	880_54_32	unassigned	2.77764	0.0377993
AGCGCCATCCGCACCT-0	CD4 T	CD4 T	880_42_50	NTC	1.26372	0.697161
AGCGCCTGTAATCGCT-0	Kupffer	Kupffer+MonoMac+Endothelial	880_77_24	NTC	2.53695	-0.613887
AGCGCCTGTCTCACAG-0	Mono/Mac	Kupffer+MonoMac+Endothelial	880_39_12	unassigned	1.8867	0.153839
AGCGGATGTTTGGAGA-0	Kupffer	Kupffer+MonoMac+Endothelial	880_29_28	unassigned	1.64136	-1.1681
AGCGGTTTCACTATCC-0	Treg	Treg	880_5_48	NTC	-0.0244474	-0.901306
AGCGTAAGTGAGTTAG-0	NK	NK	880_34_21	unassigned	0.867466	-0.0703714
AGCGTAAGTTCGATGT-0	Endothelial	Kupffer+MonoMac+Endothelial	880_21_22	unassigned	1.41216	-0.985973
AGCGTAAGTTTAGGAG-0	DC	DC	880_19_18	unassigned	1.15123	-0.364828
AGCGTTGCAAGTATCA-0	Treg	Treg	880_75_17	unassigned	0.535502	-0.353161
AGCGTTGCATAGGGCC-0	CD8 T	CD8 T	880_47_75	NTC	-0.669997	-1.46927
AGCGTTGCATGCGCTT-0	Kupffer	Kupffer+MonoMac+Endothelial	880_56_56	unassigned	4.63655	0.68539
AGCTACGCAGTTAATG-0	Kupffer	Kupffer+MonoMac+Endothelial	880_53_18	unassigned	7.50408	2.45988
AGCTACGCATGCGTCT-0	DC	DC	880_37_57	unassigned	4.68241	2.92827
AGCTATGTCTAGTCGA-0	Mono/Mac	Kupffer+MonoMac+Endothelial	880_31_35	unassigned	0.858525	-0.730665
AGCTGAGAGCGCTGTG-0	NK	NK	880_49_19	NTC	0.269514	-0.894263
AGCTGAGAGGCTTCGG-0	Endothelial	Kupffer+MonoMac+Endothelial	880_28_73	NTC	3.29122	0.422862
AGCTGAGAGTCAAGCC-0	Endothelial	Kupffer+MonoMac+Endothelial	880_43_23	unassigned	2.86349	0.102166
AGCTGGTTCCGCGAAT-0	NK	NK	880_60_15	NTC	2.15202	1.69956
AGCTGTTGTCTCCAGA-0	CD8 T	CD8 T	880_54_47	NTC	0.322765	-0.345623
AGCTGTTGTGAGGAAG-0	Mono/Mac	Kupffer+MonoMac+Endothelial	880_38_17	Ifng	1.67779	-0.0258807
AGCTTAACAACGGGTC-0	Kupffer	Kupffer+MonoMac+Endothelial	880_39_15	unassigned	3.59954	0.0436645
AGCTTAACACAATGAC-0	Endothelial	Kupffer+MonoMac+Endothelial	880_28_68	unassigned	3.95605	0.921315
AGCTTAACATGCTACC-0	Endothelial	Kupffer+MonoMac+Endothelial	880_48_26	NTC	1.41988	-0.980182
AGCTTACGTTTACGCG-0	Treg	Treg	880_1_45	NTC	2.69471	1.76053
AGCTTAGTCAGCCTAA-0	CD4 T	CD4 T	880_13_13	NTC	0.893259	0.278366
AGCTTAGTCCATGTCT-0	Endothelial	Kupffer+MonoMac+Endothelial	880_38_70	unassigned	5.14858	1.81542
AGCTTAGTCCTCAGCC-0	CD8 T	CD8 T	880_78_34	unassigned	0.899826	0.30752
AGCTTATAGGAACCAG-0	DC	DC	880_32_53	NTC	3.14661	1.49602
AGCTTATAGTAAGTAG-0	Kupffer	Kupffer+MonoMac+Endothelial	880_78_10	unassigned	4.50929	0.606638
AGGAAATCACCTGTGT-0	Endothelial	Kupffer+MonoMac+Endothelial	880_51_74	unassigned	3.23344	0.379539
AGGAACTAGGGCAGAC-0	Mono/Mac	Kupffer+MonoMac+Endothelial	880_22_16	NTC	2.70885	0.861115
AGGAACTAGGTAGCGA-0	Mono/Mac	Kupffer+MonoMac+Endothelial	880_11_79	NTC	0.757219	-0.817816
AGGAACTAGTAGGAAC-0	CD8 T	CD8 T	880_46_55	NTC	0.471775	-0.176967
AGGAATGCAAGCTGTG-0	Mono/Mac	Kupffer+MonoMac+Endothelial	880_44_19	NTC	-0.013789	-1.48109
AGGACAACAAACTCGG-0	Kupffer	Kupffer+MonoMac+Endothelial	880_21_51	Ifng	1.21337	-1.43294
AGGACCAAGCAACCTA-0	CD8 T	CD8 T	880_27_23	NTC	0.0476896	-0.656966
AGGACCCCATCGCTCG-0	Treg	Treg	880_49_24	NTC	1.32864	0.42326
AGGAGATTCTCACCTG-0	Endothelial	Kupffer+MonoMac+Endothelial	880_16_16	unassigned	2.04641	-0.510438
AGGAGCCAGCATTAAC-0	DC	DC	880_40_57	NTC	0.913627	-0.58641
AGGAGTTAGTGATCTG-0	Mono/Mac	Kupffer+MonoMac+Endothelial	880_34_71	NTC	2.51776	0.696727
AGGATCAGTGAGTGTA-0	Endothelial	Kupffer+MonoMac+Endothelial	880_6_50	Ifng	3.26427	0.402652
AGGATCAGTTAGTGCT-0	CD8 T	CD8 T	880_1_51	unassigned	1.11848	0.555005
AGGATTAAGAACCTGC-0	Kupffer	Kupffer+MonoMac+Endothelial	880_56_55	unassigned	1.04342	-1.53811
AGGATTGGTATGGCAA-0	B cell	B cell	880_79_19	NTC	0.00321948	-0.782875
AGGCAAGTCATGTGCA-0	Kupffer	Kupffer+MonoMac+Endothelial	880_65_5	unassigned	1.54122	-1.23006
AGGCACGGTTTCACTT-0	Endothelial	Kupffer+MonoMac+Endothelial	880_55_59	NTC	0.588009	-1.60388
AGGCATGAGCGCTCCT-0	Kupffer	Kupffer+MonoMac+Endothelial	880_19_47	unassigned	2.75551	-0.478633
AGGCATGAGGGCTATC-0	Endothelial	Kupffer+MonoMac+Endothelial	880_70_17	unassigned	5.34308	1.96124
AGGCATGAGTTGGTTG-0	CD8 T	CD8 T	880_24_66	unassigned	0.414193	-0.242141
AGGCATTCAATCTAAG-0	Kupffer	Kupffer+MonoMac+Endothelial	880_64_7	unassigned	1.55017	-1.22452
AGGCCAAAGGTATGAA-0	CD8 T	CD8 T	880_22_52	unassigned	1.38863	0.860765
AGGCCAGGTAGCGCAG-0	B cell	B cell	880_18_9	unassigned	0.844728	0.126494
AGGCCATTCACACACA-0	Mono/Mac	Kupffer+MonoMac+Endothelial	880_63_9	unassigned	1.12768	-0.499117
AGGCCATTCCTTAACC-0	Endothelial	Kupffer+MonoMac+Endothelial	880_52_62	NTC	3.66103	0.700127
AGGCCATTCGATCATG-0	Mono/Mac	Kupffer+MonoMac+Endothelial	880_25_54	unassigned	2.88248	1.01048
AGGCCATTCGCTCTAT-0	Mono/Mac	Kupffer+MonoMac+Endothelial	880_46_59	unassigned	0.225171	-1.27552
AGGCGAATCTGGTAGC-0	CD8 T	CD8 T	880_66_33	NTC	0.68836	0.0681737
AGGCGCAGTATTGCAC-0	Mono/Mac	Kupffer+MonoMac+Endothelial	880_64_42	unassigned	2.55234	0.726471
AGGCGGACAATATCTC-0	B cell	B cell	880_54_47	NTC	0.059023	-0.722572
AGGCGGACATCCGGTT-0	Mono/Mac	Kupffer+MonoMac+Endothelial	880_15_51	NTC	0.596903	-0.955731
AGGCGTTTCACTAGGC-0	Mono/Mac	Kupffer+MonoMac+Endothelial	880_69_5	NTC	1.73649	0.0246201
AGGCGTTTCAGTACCA-0	Endothelial	Kupffer+MonoMac+Endothelial	880_31_77	NTC	1.41682	-0.982478
AGGCTCCGTAACGTCT-0	Endothelial	Kupffer+MonoMac+Endothelial	880_76_14	NTC	3.33357	0.454611
AGGCTCCGTAACTGCT-0	CD8 T	CD8 T	880_52_16	NTC	1.25343	0.707745
AGGCTTATCATGGACC-0	pDC	pDC	880_18_52	unassigned	-0.280777	-0.938024
AGGCTTGCAAAGGAAT-0	DC	DC	880_51_25	unassigned	1.442	-0.0936647
AGGCTTGCATGCTCCG-0	Endothelial	Kupffer+MonoMac+Endothelial	880_68_38	Ifng	2.19182	-0.401418
AGGCTTGCATTCGGCT-0	Treg	Treg	880_43_19	NTC	0.542672	-0.346142
AGGGAACCAGCTACCT-0	Mono/Mac	Kupffer+MonoMac+Endothelial	880_70_62	unassigned	0.459469	-1.07396
AGGGAACCATTGGCAG-0	B cell	B cell	880_39_61	NTC	0.203922	-0.565987
AGGGAAGGTATAGCCT-0	CD8 T	CD8 T	880_17_25	unassigned	0.316663	-0.35253
AGGGAAGGTGGCGTGA-0	Endothelial	Kupffer+MonoMac+Endothelial	880_43_19	NTC	2.70535	-0.0164008
AGGGAAGGTTCGCACA-0	CD8 T	CD8 T	880_68_29	unassigned	0.501324	-0.143522
AGGGAGTCATCGAACG-0	B cell	B cell	880_23_51	unassigned	0.0715147	-0.709073
AGGGATTAGCGGACTT-0	CD8 T	CD8 T	880_73_43	unassigned	-0.0245439	-0.738723
AGGGCTAAGCAGGGAC-0	Endothelial	Kupffer+MonoMac+Endothelial	880_4_51	Ifng	7.88385	3.86619
AGGGCTAAGCGCCAAT-0	Endothelial	Kupffer+MonoMac+Endothelial	880_51_41	unassigned	2.62509	-0.0765754
AGGGCTAAGGGTCCAT-0	CD8 T	CD8 T	880_7_71	unassigned	1.36796	0.837378
AGGGCTAAGTTAGTAC-0	Mono/Mac	Kupffer+MonoMac+Endothelial	880_40_69	unassigned	2.31458	0.521936
AGGGGTTGTTTAATCG-0	CD8 T	CD8 T	880_12_74	unassigned	0.581179	-0.0531387
AGGGTACGTAGGTAGC-0	NK	NK	880_21_67	unassigned	0.919127	0.000809503
AGGGTATAGGCGTCTG-0	CD8 T	CD8 T	880_21_27	unassigned	1.05693	0.485341
AGGGTTGAGCCAGTGT-0	Kupffer	Kupffer+MonoMac+Endothelial	880_14_60	NTC	1.88413	-1.01786
AGGTAAATCACACTAG-0	CD8 T	CD8 T	880_18_50	NTC	0.326233	-0.341698
AGGTAAATCCATCAAG-0	Mono/Mac	Kupffer+MonoMac+Endothelial	880_56_55	unassigned	2.0537	0.29751
AGGTAACAGAAGCTAA-0	Kupffer	Kupffer+MonoMac+Endothelial	880_53_57	NTC	1.63423	-1.17251
AGGTAACAGCCAGGTT-0	Treg	Treg	880_0_60	unassigned	0.401548	-0.484291
AGGTAGTAGTAGCTGC-0	CD8 T	CD8 T	880_41_64	NTC	-0.760272	-1.57145
AGGTATGGTCTGTCCT-0	DC	DC	880_75_34	NTC	3.15693	1.50565
AGGTGCAAGCGCTACG-0	Mono/Mac	Kupffer+MonoMac+Endothelial	880_31_26	Ifng	3.64498	1.66644
AGGTGCTTCTAGTCGA-0	Endothelial	Kupffer+MonoMac+Endothelial	880_26_50	unassigned	2.08902	-0.478495
AGGTGCTTCTGGAACC-0	Mono/Mac	Kupffer+MonoMac+Endothelial	880_30_61	unassigned	0.474917	-1.06067
AGGTTAGGTAAGCAGC-0	Endothelial	Kupffer+MonoMac+Endothelial	880_58_40	NTC	4.9523	1.66826
AGGTTAGGTTTACGAC-0	Kupffer	Kupffer+MonoMac+Endothelial	880_48_9	unassigned	3.92351	0.244144
AGGTTCATCCTTCGGC-0	CD8 T	CD8 T	880_49_26	NTC	0.405086	-0.252449
AGGTTGAGTTCCGTCT-0	Cholangiocyte	Cholangiocyte	880_45_19	NTC	3.29273
AGGTTGCTCCCATACT-0	DC	DC	880_68_30	unassigned	1.16721	-0.349925
AGTAACCCAACATAGC-0	Kupffer	Kupffer+MonoMac+Endothelial	880_14_22	NTC	5.30533	1.09924
AGTAACGGTTCGTTGG-0	Neutrophil	Neutrophil	880_42_53	NTC	1.9758	-0.362826
AGTAATGAGGTCATGC-0	Endothelial	Kupffer+MonoMac+Endothelial	880_48_6	unassigned	2.99778	0.202856
AGTACACCATAATTCC-0	Kupffer	Kupffer+MonoMac+Endothelial	880_56_17	NTC	1.45618	-1.28269
AGTACAGGTGAGACAC-0	Kupffer	Kupffer+MonoMac+Endothelial	880_75_34	NTC	3.66988	0.0871951
AGTACAGGTGGAGAGA-0	Mono/Mac	Kupffer+MonoMac+Endothelial	880_33_61	unassigned	0.164812	-1.32745
AGTACCATCACTCTCG-0	Mono/Mac	Kupffer+MonoMac+Endothelial	880_41_39	unassigned	1.66314	-0.0384835
AGTACCATCCTTAACC-0	CD8 T	CD8 T	880_76_27	NTC	0.302309	-0.368776
AGTACCGCAACATCCC-0	Mono/Mac	Kupffer+MonoMac+Endothelial	880_4_46	unassigned	1.46663	-0.207529
AGTACCGCACATAGGT-0	Mono/Mac	Kupffer+MonoMac+Endothelial	880_77_43	unassigned	1.34376	-0.313236
AGTACCGCATAGACGT-0	Treg	Treg	880_45_14	NTC	1.34276	0.437082
AGTACCGCATTCAGGG-0	HPC	HPC	880_42_71	unassigned	1.77843
AGTACCTGTCAGGACG-0	Endothelial	Kupffer+MonoMac+Endothelial	880_61_31	unassigned	2.7943	0.0502908
AGTACGGAGCGACTGT-0	B cell	B cell	880_7_56	unassigned	3.72928	3.24367
AGTACTTAGGATCAGG-0	Mono/Mac	Kupffer+MonoMac+Endothelial	880_54_7	unassigned	3.21827	1.29935
AGTACTTAGGGTTGGA-0	HPC	HPC	880_15_76	NTC	-0.467795
AGTATCACAAGCCTGA-0	Mono/Mac	Kupffer+MonoMac+Endothelial	880_28_69	unassigned	0.50841	-1.03186
AGTATCACAAGTTACA-0	Erythrocytes	Erythrocytes	880_29_30	NTC	-1.05292	-0.603343
AGTATCACAATGGAGA-0	Mono/Mac	Kupffer+MonoMac+Endothelial	880_36_57	unassigned	0.314443	-1.19872
AGTATCACATGAGCGC-0	Endothelial	Kupffer+MonoMac+Endothelial	880_25_24	NTC	2.27457	-0.339373
AGTATGAAGTTGCCGG-0	NK	NK	880_48_38	unassigned	0.312142	-0.835527
AGTATTGCACAAGCGC-0	Mono/Mac	Kupffer+MonoMac+Endothelial	880_4_73	unassigned	1.89235	0.158702
AGTATTGCATAGGTGT-0	NKT	NKT	880_77_8	unassigned	-0.0361816	-0.840844
AGTCAACCATCCATGC-0	Erythrocytes	Erythrocytes	880_27_55	unassigned	-1.46926	-0.975008
AGTCAAGGTTCGATTA-0	DC	DC	880_32_51	unassigned	4.88942	3.12132
AGTCACGCATCATCTG-0	Mono/Mac	Kupffer+MonoMac+Endothelial	880_18_58	unassigned	1.77526	0.0579714
AGTCACGCATGGAACT-0	CD8 T	CD8 T	880_68_30	unassigned	0.693535	0.0740306
AGTCAGCTCAATCACG-0	DC	DC	880_2_67	unassigned	2.80859	1.18079
AGTCAGGAGCATGGTC-0	Mono/Mac	Kupffer+MonoMac+Endothelial	880_28_77	NTC	2.74117	0.888919
AGTCAGGAGGTTGATT-0	CD8 T	CD8 T	880_34_77	NTC	0.266041	-0.409826
AGTCAGGAGTCGACCG-0	Kupffer	Kupffer+MonoMac+Endothelial	880_72_45	unassigned	7.43898	2.41959
AGTCAGGAGTTGGCCG-0	Endothelial	Kupffer+MonoMac+Endothelial	880_49_48	NTC	2.48014	-0.18525
AGTCAGTCAGTAATGC-0	CD4 T	CD4 T	880_21_44	unassigned	-0.384684	-1.1663
AGTCATTAGGAGGACC-0	Kupffer	Kupffer+MonoMac+Endothelial	880_43_56	NTC	3.3597	-0.104753
AGTCCAGCAACCTGTC-0	Endothelial	Kupffer+MonoMac+Endothelial	880_61_52	unassigned	3.0795	0.264122
AGTCCAGCACCAGCAA-0	CD8 T	CD8 T	880_31_21	NTC	1.26356	0.719209
AGTCCAGCAGGACTGC-0	DC	DC	880_44_62	unassigned	1.18403	-0.33424
AGTCCAGCATCGCTAC-0	Mono/Mac	Kupffer+MonoMac+Endothelial	880_16_52	NTC	0.861131	-0.728424
AGTCCCAGTAATGGGC-0	B cell	B cell	880_26_23	NTC	2.85708	2.30112
AGTCCCAGTCCCGATA-0	Treg	Treg	880_0_67	unassigned	-0.411235	-1.27994
AGTCCCAGTGAGATAT-0	CD8 T	CD8 T	880_49_25	NTC	-0.0995294	-0.823594
AGTCCCTCATGACGTG-0	Kupffer	Kupffer+MonoMac+Endothelial	880_52_16	NTC	2.24587	-0.794008
AGTCCTGGTCAAGGCG-0	CD8 T	CD8 T	880_51_21	unassigned	-0.414859	-1.1805
AGTCCTGGTGGCGCAA-0	Mono/Mac	Kupffer+MonoMac+Endothelial	880_39_17	NTC	1.50375	-0.175599
AGTCGATCATTCAGTT-0	DC	DC	880_9_10	unassigned	-0.0770519	-1.51029
AGTCGGGGTAAGCTGA-0	Endothelial	Kupffer+MonoMac+Endothelial	880_12_50	unassigned	1.13029	-1.1973
AGTCGGGGTATGGTTC-0	Mono/Mac	Kupffer+MonoMac+Endothelial	880_49_49	NTC	1.21042	-0.427937
AGTCGGGGTCCATCAG-0	Mono/Mac	Kupffer+MonoMac+Endothelial	880_44_57	unassigned	2.23112	0.450132
AGTCGGTTCATGAGCC-0	CD8 T	CD8 T	880_52_44	unassigned	0.108264	-0.588405
AGTCGGTTCCTGCGCT-0	DC	DC	880_61_53	unassigned	1.36368	-0.166701
AGTCTCAAGCATAGCC-0	Mono/Mac	Kupffer+MonoMac+Endothelial	880_35_18	NTC	2.03582	0.282122
AGTCTTAGTTCGCTCT-0	CD8 T	CD8 T	880_32_53	NTC	1.88025	1.4172
AGTCTTAGTTGACGGG-0	Endothelial	Kupffer+MonoMac+Endothelial	880_70_10	unassigned	2.3618	-0.273977
AGTCTTGAGAAGCCAG-0	B cell	B cell	880_54_30	unassigned	1.10542	0.408211
AGTGAACAGCATTACG-0	CD8 T	CD8 T	880_22_22	unassigned	0.522673	-0.119359
AGTGAATGTTCCGGTA-0	Kupffer	Kupffer+MonoMac+Endothelial	880_46_43	unassigned	3.31755	-0.130834
AGTGAATGTTGAGTGA-0	Mono/Mac	Kupffer+MonoMac+Endothelial	880_75_17	unassigned	3.66943	1.68747
AGTGAATGTTGCTATA-0	Endothelial	Kupffer+MonoMac+Endothelial	880_73_10	NTC	0.626999	-1.57465
AGTGAATGTTGGCCGT-0	Mono/Mac	Kupffer+MonoMac+Endothelial	880_35_35	NTC	0.787534	-0.791737
AGTGAATGTTTGGGCC-0	Kupffer	Kupffer+MonoMac+Endothelial	880_50_17	NTC	4.95805	0.88434
AGTGACAGTGGGTTAA-0	CD8 T	CD8 T	880_42_9	unassigned	-0.427592	-1.19491
AGTGACAGTTAGAGTG-0	pDC	pDC	880_21_58	unassigned	-0.381721	-1.06334
AGTGAGGTCATGACTG-0	Endothelial	Kupffer+MonoMac+Endothelial	880_60_56	Ifng	2.15177	-0.431449
AGTGAGGTCGACCTGG-0	Mono/Mac	Kupffer+MonoMac+Endothelial	880_17_40	unassigned	0.942245	-0.658644
AGTGAGGTCTGGTGTA-0	CD8 T	CD8 T	880_29_67	unassigned	-0.126989	-0.854675
AGTGAGTAGATTCCAG-0	Mono/Mac	Kupffer+MonoMac+Endothelial	880_75_16	unassigned	2.0961	0.333981
AGTGAGTAGGTCATAT-0	Kupffer	Kupffer+MonoMac+Endothelial	880_57_10	unassigned	2.87617	-0.403969
AGTGAGTAGTAGCGAG-0	Endothelial	Kupffer+MonoMac+Endothelial	880_34_63	unassigned	-0.31309	-2.27948
AGTGATCCATCCATCA-0	Mono/Mac	Kupffer+MonoMac+Endothelial	880_16_59	unassigned	2.73802	0.886203
AGTGATGGTCAATGTC-0	Kupffer	Kupffer+MonoMac+Endothelial	880_3_73	unassigned	1.93784	-0.984627
AGTGATGGTGAACCTT-0	NKT	NKT	880_49_69	NTC	1.72704	2.24415
AGTGATGGTTCCAGCA-0	Mono/Mac	Kupffer+MonoMac+Endothelial	880_59_53	unassigned	2.5808	0.750953
AGTGATTTCATGCACA-0	Kupffer	Kupffer+MonoMac+Endothelial	880_14_59	NTC	4.07499	0.337886
AGTGATTTCCACCTAT-0	Endothelial	Kupffer+MonoMac+Endothelial	880_63_22	unassigned	0.324126	-1.80173
AGTGATTTCCATCATC-0	Kupffer	Kupffer+MonoMac+Endothelial	880_52_24	Ifng	5.49917	1.21919
AGTGCATCATCGAAGT-0	NK	NK	880_14_17	NTC	0.274882	-0.886866
AGTGCCCGTTAATTCG-0	Mono/Mac	Kupffer+MonoMac+Endothelial	880_49_52	NTC	1.83697	0.111062
AGTGCCCGTTAGAGGC-0	B cell	B cell	880_70_24	NTC	1.15923	0.466357
AGTGCCCGTTATGAGG-0	Mono/Mac	Kupffer+MonoMac+Endothelial	880_37_12	NTC	1.89101	0.157548
AGTGCGCCAGTAATGC-0	NK	NK	880_40_12	unassigned	0.554928	-0.501004
AGTGCGGGTTTGCACG-0	DC	DC	880_49_54	unassigned	1.81639	0.255489
AGTGCTTGTCTAGGTT-0	Neutrophil	Neutrophil	880_47_15	Ifng	6.62383	2.80032
AGTGCTTGTGCAGCCT-0	Kupffer	Kupffer+MonoMac+Endothelial	880_30_20	NTC	3.50569	-0.0144099
AGTGCTTGTTGGCTTG-0	CD4 T	CD4 T	880_0_59	NTC	3.93968	3.72223
AGTGGAACAACTGGTG-0	Kupffer	Kupffer+MonoMac+Endothelial	880_75_29	unassigned	2.95385	-0.355897
AGTGGATAGAACCTTG-0	Treg	Treg	880_37_46	unassigned	0.180776	-0.700409
AGTGGATAGCGGAGAC-0	Treg	Treg	880_64_42	unassigned	2.85448	1.91693
AGTGGCGGTAAGCGCG-0	DC	DC	880_52_44	unassigned	0.874143	-0.623232
AGTGGCGGTAATGCGA-0	Kupffer	Kupffer+MonoMac+Endothelial	880_24_72	unassigned	1.66486	-1.15355
AGTGGTGAGCAGGCTT-0	Mono/Mac	Kupffer+MonoMac+Endothelial	880_16_73	Ifng	2.91106	1.03507
AGTGTAAAGCTACAGC-0	Mono/Mac	Kupffer+MonoMac+Endothelial	880_12_17	NTC	1.74156	0.028983
AGTGTAAAGTAGGTCC-0	Mono/Mac	Kupffer+MonoMac+Endothelial	880_49_25	NTC	2.01296	0.262459
AGTGTCATCCTTAACC-0	Cholangiocyte	Cholangiocyte	880_30_67	unassigned	1.76793
AGTGTCGCACAATTAG-0	DC	DC	880_34_79	unassigned	2.29382	0.700724
AGTGTCGCATGAAGTC-0	B cell	B cell	880_15_48	NTC	0.45271	-0.297137
AGTGTCGCATGGATTA-0	B cell	B cell	880_14_65	unassigned	-0.650445	-1.48925
AGTGTGAGTTTGACTA-0	Mono/Mac	Kupffer+MonoMac+Endothelial	880_10_60	unassigned	0.767337	-0.809112
AGTGTTGTCATGACGC-0	Mono/Mac	Kupffer+MonoMac+Endothelial	880_23_72	unassigned	2.5746	0.745621
AGTTAGAAGGTACCAC-0	DC	DC	880_64_27	NTC	0.435168	-1.03261
AGTTAGAAGTTAACGT-0	Kupffer	Kupffer+MonoMac+Endothelial	880_32_66	unassigned	3.80758	0.172409
AGTTAGCCATCCTGAC-0	Kupffer	Kupffer+MonoMac+Endothelial	880_39_50	NTC	2.37266	-0.715552
AGTTATCAGAATCATC-0	Kupffer	Kupffer+MonoMac+Endothelial	880_44_12	NTC	5.80899	1.41092
AGTTATCAGGTCCCAG-0	CD8 T	CD8 T	880_58_70	unassigned	-0.0957727	-0.819342
AGTTATCAGTAGGGCA-0	DC	DC	880_61_53	unassigned	1.00078	-0.505137
AGTTGAAAGAACCTTG-0	Treg	Treg	880_13_72	NTC	1.2591	0.355186
AGTTGAGGTGAGCCGA-0	Endothelial	Kupffer+MonoMac+Endothelial	880_59_43	unassigned	0.408001	-1.73884
AGTTGCATCACTCTAC-0	Neutrophil	Neutrophil	880_37_54	NTC	2.10028	-0.278118
AGTTGCATCCTCATGT-0	Neutrophil	Neutrophil	880_49_61	NTC	2.30099	-0.141526
AGTTGCATCTATGGCA-0	Kupffer	Kupffer+MonoMac+Endothelial	880_63_4	unassigned	4.98538	0.901252
AGTTGGGAGCGGTTCG-0	Endothelial	Kupffer+MonoMac+Endothelial	880_63_25	NTC	1.95601	-0.578216
AGTTGGTCACTCGCAT-0	Kupffer	Kupffer+MonoMac+Endothelial	880_6_60	unassigned	2.5939	-0.578641
AGTTTAGCAAACCGGC-0	Endothelial	Kupffer+MonoMac+Endothelial	880_36_75	unassigned	4.06953	1.0064
AGTTTAGCAACTGCGA-0	Mono/Mac	Kupffer+MonoMac+Endothelial	880_52_16	NTC	1.58986	-0.101518
AGTTTAGCAGGTATGT-0	Endothelial	Kupffer+MonoMac+Endothelial	880_12_62	unassigned	2.33667	-0.292816
AGTTTCAGTTCGCTAG-0	Endothelial	Kupffer+MonoMac+Endothelial	880_2_53	unassigned	0.553454	-1.62979
AGTTTCCTCGTGCATA-0	CD8 T	CD8 T	880_12_46	unassigned	0.475031	-0.173281
AGTTTCCTCTAGTCCT-0	CD8 T	CD8 T	880_49_25	NTC	0.352347	-0.312141
ATAACCACATAACGAC-0	Endothelial	Kupffer+MonoMac+Endothelial	880_23_64	unassigned	1.29427	-1.07436
ATAACGGGTCCATTCC-0	Endothelial	Kupffer+MonoMac+Endothelial	880_39_58	unassigned	3.68574	0.718652
ATAACGTTCCCTTGAT-0	Kupffer	Kupffer+MonoMac+Endothelial	880_75_3	unassigned	3.42553	-0.0640163
ATAAGCAAGGATCTGC-0	Endothelial	Kupffer+MonoMac+Endothelial	880_73_10	NTC	0.356529	-1.77743
ATAAGCTTCAGCGGTT-0	Endothelial	Kupffer+MonoMac+Endothelial	880_30_64	NTC	3.03073	0.227555
ATAAGTGAGCGATCTA-0	Kupffer	Kupffer+MonoMac+Endothelial	880_53_57	NTC	4.20025	0.4154
ATAAGTGAGTTGGTAT-0	Mono/Mac	Kupffer+MonoMac+Endothelial	880_19_23	NTC	1.76632	0.0502864
ATACAGCCAACTCGGA-0	CD8 T	CD8 T	880_37_24	NTC	-0.145011	-0.875072
ATACAGCCACTTCGCG-0	Mono/Mac	Kupffer+MonoMac+Endothelial	880_45_18	NTC	1.23839	-0.403879
ATACCAACAGGATGGG-0	Endothelial	Kupffer+MonoMac+Endothelial	880_38_73	Ifng	4.29952	1.17884
ATACCATAGGATAGAC-0	Mono/Mac	Kupffer+MonoMac+Endothelial	880_52_36	unassigned	2.47977	0.66404
ATACCATAGGCATGTC-0	Endothelial	Kupffer+MonoMac+Endothelial	880_12_51	unassigned	3.99025	0.94696
ATACCATAGGGGCTAA-0	DC	DC	880_68_57	unassigned	0.677039	-0.807047
ATACCATAGTCAGCTA-0	NK	NK	880_35_52	NTC	0.424038	-0.681351
ATACCCTTCTATGACG-0	Mono/Mac	Kupffer+MonoMac+Endothelial	880_44_20	NTC	2.66363	0.822214
ATACCTAGTTGAGTCT-0	CD8 T	CD8 T	880_56_55	unassigned	1.76499	1.28675
ATACGAAAGAAGCTAA-0	CD4 T	CD4 T	880_25_25	NTC	1.40704	0.859181
ATACGAAAGTCGAATT-0	Mono/Mac	Kupffer+MonoMac+Endothelial	880_42_46	unassigned	0.555126	-0.991671
ATACGAAAGTTACCGA-0	Endothelial	Kupffer+MonoMac+Endothelial	880_0_75	unassigned	1.51336	-0.910098
ATACGATTCATGCAAT-0	Endothelial	Kupffer+MonoMac+Endothelial	880_50_29	unassigned	4.22615	1.12383
ATACGATTCGAACGGA-0	CD8 T	CD8 T	880_58_7	unassigned	0.305452	-0.365219
ATACGTTAGCGCTCGA-0	DC	DC	880_23_57	unassigned	5.44356	3.6381
ATACGTTAGGATGACG-0	CD8 T	CD8 T	880_1_49	unassigned	1.15926	0.601159
ATACGTTAGGTCCAAC-0	Endothelial	Kupffer+MonoMac+Endothelial	880_57_27	unassigned	2.02119	-0.529351
ATACTCCTCATGCTCT-0	Treg	Treg	880_42_58	NTC	-0.664292	-1.52766
ATACTCCTCCTCACCA-0	CD8 T	CD8 T	880_51_38	unassigned	-0.917337	-1.74923
ATACTCCTCCTGTGAA-0	B cell	B cell	880_30_17	unassigned	0.534323	-0.208942
ATACTGGTCCGCCAGA-0	DC	DC	880_40_28	NTC	2.80582	1.1782
ATACTTGGTGCGAGTG-0	NKT	NKT	880_35_28	NTC	0.252454	-0.335838
ATACTTGGTTTACGAC-0	CD8 T	CD8 T	880_74_44	NTC	1.57219	1.06854
ATAGCAGGTTCGCACA-0	NK	NK	880_45_12	NTC	0.300407	-0.851696
ATAGCAGGTTTCGGGC-0	Kupffer	Kupffer+MonoMac+Endothelial	880_73_22	Ifng	3.24222	-0.177448
ATAGCCTGTCATGCTG-0	CD8 T	CD8 T	880_16_69	unassigned	0.546385	-0.0925198
ATAGCCTGTGCGCATC-0	Endothelial	Kupffer+MonoMac+Endothelial	880_30_21	NTC	1.36531	-1.02109
ATAGCCTGTTCACCAG-0	Mono/Mac	Kupffer+MonoMac+Endothelial	880_26_75	NTC	2.42371	0.615816
ATAGCGAGTGAACTAG-0	CD8 T	CD8 T	880_16_28	unassigned	1.08623	0.518503
ATAGCGCTCACTGGTA-0	Mono/Mac	Kupffer+MonoMac+Endothelial	880_42_58	NTC	2.5031	0.684113
ATAGCGCTCCCATGAA-0	Kupffer	Kupffer+MonoMac+Endothelial	880_54_42	NTC	1.16286	-1.4642
ATAGCGGAGCATGCGT-0	Endothelial	Kupffer+MonoMac+Endothelial	880_40_36	unassigned	4.27985	1.16408
ATAGCGGAGGGTATCC-0	Kupffer	Kupffer+MonoMac+Endothelial	880_76_28	NTC	0.570074	-1.83103
ATAGGATGTGAAGCCG-0	Endothelial	Kupffer+MonoMac+Endothelial	880_55_52	NTC	0.657683	-1.55164
ATAGGATGTTGCCCTT-0	Kupffer	Kupffer+MonoMac+Endothelial	880_48_77	Ifng	0.797401	-1.69035
ATAGGCCTCGACCGAT-0	CD8 T	CD8 T	880_39_55	NTC	0.508137	-0.135811
ATAGGCGAGAAGGACT-0	Kupffer	Kupffer+MonoMac+Endothelial	880_54_44	unassigned	3.15803	-0.229546
ATAGGCGAGATTCGCA-0	Mono/Mac	Kupffer+MonoMac+Endothelial	880_34_29	NTC	0.516906	-1.02455
ATAGGCGAGCGGTCCA-0	Kupffer	Kupffer+MonoMac+Endothelial	880_35_74	NTC	1.54602	-1.22709
ATAGGCGAGGCTATAT-0	DC	DC	880_26_20	NTC	1.02622	-0.481405
ATAGGCGAGGGTAGAT-0	Endothelial	Kupffer+MonoMac+Endothelial	880_29_72	NTC	2.73759	0.00777339
ATAGGCTCAAGCTAGT-0	NK	NK	880_10_79	unassigned	-0.3394	-1.73326
ATAGGGGTCCGCTAGG-0	Mono/Mac	Kupffer+MonoMac+Endothelial	880_43_55	NTC	1.13025	-0.49691
ATAGGGGTCCTCTCGA-0	Kupffer	Kupffer+MonoMac+Endothelial	880_34_15	NTC	6.11237	1.59866
ATAGGGGTCGTTAGGC-0	Mono/Mac	Kupffer+MonoMac+Endothelial	880_47_30	NTC	1.06225	-0.555409
ATAGGGGTCTATGCGA-0	Endothelial	Kupffer+MonoMac+Endothelial	880_64_44	NTC	0.778957	-1.46072
ATAGGGTAGCCACACG-0	Treg	Treg	880_66_24	NTC	0.783692	-0.110202
ATAGGGTAGCCTGGTG-0	CD8 T	CD8 T	880_0_62	unassigned	-0.0909323	-0.813864
ATAGGGTAGTCATCCT-0	DC	DC	880_16_66	unassigned	1.51777	-0.0229972
ATAGTCACATTCAACT-0	Mono/Mac	Kupffer+MonoMac+Endothelial	880_60_16	NTC	0.430547	-1.09884
ATATCAGCAACCTTCA-0	Endothelial	Kupffer+MonoMac+Endothelial	880_57_11	unassigned	4.96527	1.67798
ATATCAGCAAGGGATA-0	Endothelial	Kupffer+MonoMac+Endothelial	880_55_52	NTC	1.61247	-0.835791
ATATCCCTCACCCTGC-0	Kupffer	Kupffer+MonoMac+Endothelial	880_45_74	unassigned	3.04257	-0.300998
ATATCCCTCGCGCCAA-0	DC	DC	880_30_19	unassigned	1.43557	-0.0996542
ATATCCTCAATCCTGC-0	Neutrophil	Neutrophil	880_34_77	NTC	4.53371	1.37792
ATATCCTCACAGCAAT-0	CD8 T	CD8 T	880_48_9	unassigned	-0.165449	-0.898206
ATATCCTCACTTAGGG-0	Kupffer	Kupffer+MonoMac+Endothelial	880_23_76	Ifng	3.29748	-0.143253
ATATGGGGTGATCCGC-0	Kupffer	Kupffer+MonoMac+Endothelial	880_24_64	Ifng	4.03804	0.315019
ATATGGTTCTAGCCAA-0	Endothelial	Kupffer+MonoMac+Endothelial	880_53_7	unassigned	0.762159	-1.47331
ATATGTCAGGATAGAC-0	B cell	B cell	880_32_19	unassigned	2.60197	2.02544
ATATTCCCAACTTCCA-0	Kupffer	Kupffer+MonoMac+Endothelial	880_23_52	unassigned	1.43529	-1.29561
ATATTCCCATAATCAG-0	Mono/Mac	Kupffer+MonoMac+Endothelial	880_69_40	NTC	2.61845	0.783342
ATCAACTAGGCACACT-0	Mono/Mac	Kupffer+MonoMac+Endothelial	880_26_21	NTC	2.6908	0.845588
ATCAACTAGTGAGTCC-0	Kupffer	Kupffer+MonoMac+Endothelial	880_50_37	unassigned	0.494329	-1.8779
ATCAAGCCAAATTCCT-0	Endothelial	Kupffer+MonoMac+Endothelial	880_50_22	unassigned	2.947	0.164777
ATCAAGCCAAGCCAAT-0	Neutrophil	Neutrophil	880_64_36	unassigned	1.78605	-0.491961
ATCAAGGGTCATGGTT-0	DC	DC	880_60_54	Ifng	0.537693	-0.936997
ATCACAACAAGGTCTG-0	Kupffer	Kupffer+MonoMac+Endothelial	880_45_44	NTC	6.61142	1.90748
ATCACAACAGCACCTT-0	DC	DC	880_55_15	NTC	2.28472	0.692238
ATCACAACATTCAGTT-0	CD4 T	CD4 T	880_18_35	unassigned	0.309932	-0.381063
ATCACATAGCCTGAAC-0	Mono/Mac	Kupffer+MonoMac+Endothelial	880_78_27	NTC	1.53712	-0.146889
ATCACCTTCGAATCAT-0	CD8 T	CD8 T	880_17_21	NTC	0.893186	0.300004
ATCACCTTCGTTCATC-0	Endothelial	Kupffer+MonoMac+Endothelial	880_23_64	unassigned	0.785688	-1.45567
ATCACGATCAGCGAGA-0	Kupffer	Kupffer+MonoMac+Endothelial	880_27_29	Ifng	3.66943	0.0869183
ATCACTTCATAGGGCC-0	B cell	B cell	880_64_38	Ifng	-0.294038	-1.1041
ATCACTTCATCACATT-0	CD8 T	CD8 T	880_46_52	unassigned	0.0565422	-0.646946
ATCAGCCAGCCAGAGA-0	Endothelial	Kupffer+MonoMac+Endothelial	880_20_12	unassigned	4.21436	1.11498
ATCAGCCAGGATGGTG-0	Kupffer	Kupffer+MonoMac+Endothelial	880_10_18	NTC	3.25547	-0.169248
ATCAGCCAGGCGTTAC-0	Mono/Mac	Kupffer+MonoMac+Endothelial	880_76_29	unassigned	0.374753	-1.14684
ATCAGCCAGGTAGACG-0	Mono/Mac	Kupffer+MonoMac+Endothelial	880_50_31	NTC	2.43669	0.626979
ATCAGGCTCATATAGC-0	Mono/Mac	Kupffer+MonoMac+Endothelial	880_14_37	unassigned	1.53491	-0.148792
ATCAGGCTCCATGACA-0	Mono/Mac	Kupffer+MonoMac+Endothelial	880_45_45	NTC	3.58829	1.61767
ATCAGGGAGCTATGCA-0	Kupffer	Kupffer+MonoMac+Endothelial	880_63_57	NTC	1.31562	-1.36967
ATCAGGTCATTAGATG-0	CD8 T	CD8 T	880_18_19	unassigned	0.227475	-0.453476
ATCAGTTAGGCTTAAT-0	Mono/Mac	Kupffer+MonoMac+Endothelial	880_69_21	unassigned	1.69165	-0.0139502
ATCATCAGTGAGAGCT-0	CD8 T	CD8 T	880_18_23	NTC	0.910557	0.319666
ATCATCAGTTCGCGGT-0	DC	DC	880_79_35	unassigned	-0.587215	-1.98606
ATCATGGTCACGGCTG-0	Mono/Mac	Kupffer+MonoMac+Endothelial	880_37_58	NTC	1.72063	0.0109808
ATCATGGTCAGGTTCA-0	CD8 T	CD8 T	880_19_47	unassigned	-0.194384	-0.930955
ATCATTCCAAATGGGA-0	Mono/Mac	Kupffer+MonoMac+Endothelial	880_36_9	unassigned	0.501996	-1.03738
ATCCAAGTCCAGCTAA-0	Kupffer	Kupffer+MonoMac+Endothelial	880_11_75	unassigned	2.15806	-0.84835
ATCCAAGTCGCTTCCA-0	B cell	B cell	880_36_11	NTC	0.402888	-0.350977
ATCCAATAGGTAGCGA-0	Mono/Mac	Kupffer+MonoMac+Endothelial	880_56_64	unassigned	2.14904	0.379528
ATCCAATAGTATGGCC-0	Mono/Mac	Kupffer+MonoMac+Endothelial	880_37_57	unassigned	1.78515	0.0664818
ATCCAATAGTTAGTCG-0	Kupffer	Kupffer+MonoMac+Endothelial	880_19_75	unassigned	6.40826	1.78176
ATCCACAAGGATCATT-0	Treg	Treg	880_33_67	NTC	-0.318594	-1.18925
ATCCACAAGGCTCCTC-0	Mono/Mac	Kupffer+MonoMac+Endothelial	880_70_54	NTC	2.71332	0.86496
ATCCACAAGGTTGCGT-0	B cell	B cell	880_47_52	NTC	1.5208	0.85709
ATCCACGGTCTTGCCT-0	Kupffer	Kupffer+MonoMac+Endothelial	880_22_13	unassigned	7.2942	2.33
ATCCACGGTGAGCATA-0	Kupffer	Kupffer+MonoMac+Endothelial	880_62_55	unassigned	4.09788	0.352047
ATCCACGGTTGTCCTC-0	B cell	B cell	880_43_23	unassigned	0.445102	-0.305359
ATCCACTTCCCCAATT-0	Endothelial	Kupffer+MonoMac+Endothelial	880_26_72	unassigned	3.47858	0.563332
ATCCATGAGTGCTTGA-0	CD8 T	CD8 T	880_46_61	NTC	-0.0266252	-0.741078
ATCCCAAAGCTGGTCG-0	Kupffer	Kupffer+MonoMac+Endothelial	880_50_61	NTC	3.55232	0.0144491
ATCCCAGGTCATTGGT-0	DC	DC	880_0_62	unassigned	1.47388	-0.0639301
ATCCCAGGTGCGGATG-0	pDC	pDC	880_52_13	unassigned	-0.206027	-0.845227
ATCCCAGGTTCCAGAT-0	Endothelial	Kupffer+MonoMac+Endothelial	880_63_11	unassigned	0.847381	-1.40942
ATCCCCATCATCAGCA-0	Mono/Mac	Kupffer+MonoMac+Endothelial	880_13_61	NTC	2.68898	0.844023
ATCCCCATCGATCCGG-0	Endothelial	Kupffer+MonoMac+Endothelial	880_57_64	unassigned	2.95256	0.168947
ATCCCCTGTTCGTAGT-0	CD8 T	CD8 T	880_48_62	NTC	-0.515507	-1.29442
ATCCCGCTCATGTGTG-0	Mono/Mac	Kupffer+MonoMac+Endothelial	880_49_44	NTC	1.82371	0.0996558
ATCCCGCTCCCAGTCC-0	Endothelial	Kupffer+MonoMac+Endothelial	880_55_21	NTC	3.39019	0.49706
ATCCCGCTCCTGATCT-0	Endothelial	Kupffer+MonoMac+Endothelial	880_35_27	NTC	2.36445	-0.271991
ATCCCGCTCGATAGGG-0	Kupffer	Kupffer+MonoMac+Endothelial	880_0_61	unassigned	2.8662	-0.410141
ATCCCGCTCTAGCCAA-0	Mono/Mac	Kupffer+MonoMac+Endothelial	880_23_73	unassigned	2.13335	0.366029
ATCCCTTAGAATCGGG-0	B cell	B cell	880_30_19	unassigned	0.910637	0.197718
ATCCCTTAGTGGCGTT-0	Mono/Mac	Kupffer+MonoMac+Endothelial	880_30_57	NTC	0.220887	-1.27921
ATCCGACAGCGGTTCG-0	B cell	B cell	880_48_53	unassigned	0.351849	-0.406132
ATCCGACAGTATGACT-0	Endothelial	Kupffer+MonoMac+Endothelial	880_49_58	NTC	3.89419	0.874938
ATCCGGGTCGTTACTC-0	Mono/Mac	Kupffer+MonoMac+Endothelial	880_57_59	unassigned	1.40472	-0.260789
ATCCGTAAGGTGGCAA-0	NKT	NKT	880_54_24	unassigned	1.09794	1.14344
ATCCTAAGTGATGATG-0	Endothelial	Kupffer+MonoMac+Endothelial	880_63_37	unassigned	1.94458	-0.586784
ATCCTAAGTTGCGGAG-0	Mono/Mac	Kupffer+MonoMac+Endothelial	880_15_47	NTC	1.96671	0.222674
ATCCTAGAGCGATGCT-0	Treg	Treg	880_39_20	NTC	1.76606	0.851456
ATCCTAGAGTAGGCAG-0	Mono/Mac	Kupffer+MonoMac+Endothelial	880_34_64	unassigned	6.66581	4.26516
ATCCTCACAAATGCGT-0	CD8 T	CD8 T	880_17_45	unassigned	0.733248	0.118979
ATCCTCACAATTCGTT-0	CD8 T	CD8 T	880_23_51	unassigned	0.416089	-0.239994
ATCCTCCGTCAGCTTG-0	Endothelial	Kupffer+MonoMac+Endothelial	880_29_72	NTC	2.9367	0.157059
ATCCTCCGTTGACCAT-0	Endothelial	Kupffer+MonoMac+Endothelial	880_36_64	NTC	4.3494	1.21623
ATCCTGAAGGGCTATC-0	Mono/Mac	Kupffer+MonoMac+Endothelial	880_28_77	NTC	1.55842	-0.128566
ATCCTGTTCACCAGTA-0	Mono/Mac	Kupffer+MonoMac+Endothelial	880_49_54	unassigned	2.81247	0.95025
ATCCTGTTCCTGTCGC-0	CD8 T	CD8 T	880_63_45	NTC	1.10879	0.544033
ATCGAACCATAACGAC-0	Mono/Mac	Kupffer+MonoMac+Endothelial	880_39_15	unassigned	0.727799	-0.843125
ATCGAACCATCCCGAT-0	Endothelial	Kupffer+MonoMac+Endothelial	880_49_64	NTC	3.20443	0.357786
ATCGATTAGTCGCTAA-0	Kupffer	Kupffer+MonoMac+Endothelial	880_49_72	unassigned	3.15378	-0.232179
ATCGCCCTCCGTTAAG-0	Kupffer	Kupffer+MonoMac+Endothelial	880_58_62	NTC	2.83263	-0.430914
ATCGCCTCATAAGCCG-0	Kupffer	Kupffer+MonoMac+Endothelial	880_23_77	Ifng	3.49641	-0.0201494
ATCGCCTCATCCATGC-0	Mono/Mac	Kupffer+MonoMac+Endothelial	880_53_34	unassigned	0.701409	-0.865828
ATCGCCTCATGGCTCT-0	Kupffer	Kupffer+MonoMac+Endothelial	880_46_79	unassigned	2.75285	-0.480279
ATCGGGCCAAAGGAGC-0	pDC	pDC	880_75_35	NTC	0.58736	0.139705
ATCGGGCCATTAATCC-0	Mono/Mac	Kupffer+MonoMac+Endothelial	880_52_16	NTC	0.898076	-0.696641
ATCGGTCAGGCTTCGG-0	Mono/Mac	Kupffer+MonoMac+Endothelial	880_49_54	unassigned	4.21132	2.15364
ATCGGTCAGTGAGCGA-0	B cell	B cell	880_28_20	unassigned	0.955928	0.246662
ATCGTAGTCAGGGACA-0	T other	T other	880_44_72	Ifng	-0.618531
ATCGTAGTCCGTGCAG-0	Mono/Mac	Kupffer+MonoMac+Endothelial	880_53_47	NTC	0.653327	-0.907191
ATCGTCAAGCGAGCAA-0	Endothelial	Kupffer+MonoMac+Endothelial	880_74_44	NTC	0.472363	-1.69059
ATCGTCAAGGGTGAGC-0	Endothelial	Kupffer+MonoMac+Endothelial	880_12_63	unassigned	0.833955	-1.41948
ATCGTTAGTCTTACCC-0	CD8 T	CD8 T	880_53_21	NTC	0.714179	0.097396
ATCGTTAGTTCACTGG-0	DC	DC	880_44_53	unassigned	0.13539	-1.31218
ATCGTTGAGCCACATA-0	Kupffer	Kupffer+MonoMac+Endothelial	880_20_18	NTC	5.75715	1.37884
ATCGTTGAGGGCTTCG-0	Endothelial	Kupffer+MonoMac+Endothelial	880_31_25	NTC	3.95776	0.922601
ATCGTTGAGGTTACGC-0	CD8 T	CD8 T	880_56_7	NTC	-0.531981	-1.31306
ATCGTTGAGTGGCGAA-0	Mono/Mac	Kupffer+MonoMac+Endothelial	880_33_52	NTC	1.75935	0.0442832
ATCTAACAGGAATGAC-0	Mono/Mac	Kupffer+MonoMac+Endothelial	880_71_7	NTC	2.35457	0.556339
ATCTACCTCCGCGCTT-0	DC	DC	880_0_61	unassigned	2.6161	1.00128
ATCTACTCAATACGAC-0	Kupffer	Kupffer+MonoMac+Endothelial	880_63_43	NTC	4.72167	0.738064
ATCTACTCATTACTGT-0	Endothelial	Kupffer+MonoMac+Endothelial	880_77_20	unassigned	2.73396	0.00505189
ATCTATGGTATTGACC-0	Mono/Mac	Kupffer+MonoMac+Endothelial	880_19_8	unassigned	2.55652	0.730065
ATCTATGGTTATGAGG-0	Mono/Mac	Kupffer+MonoMac+Endothelial	880_48_75	unassigned	0.468776	-1.06595
ATCTATGGTTATGCGT-0	Endothelial	Kupffer+MonoMac+Endothelial	880_73_5	unassigned	1.09839	-1.22122
ATCTCCACACCTGTAC-0	Mono/Mac	Kupffer+MonoMac+Endothelial	880_29_50	NTC	2.34885	0.551418
ATCTCCACATGGAATC-0	Mono/Mac	Kupffer+MonoMac+Endothelial	880_47_62	NTC	0.758852	-0.816411
ATCTCCACATTAGATG-0	Endothelial	Kupffer+MonoMac+Endothelial	880_28_17	unassigned	2.00769	-0.539472
ATCTCGCCATAGGTCG-0	Mono/Mac	Kupffer+MonoMac+Endothelial	880_17_76	NTC	2.25767	0.472979
ATCTCGCCATTCGCTA-0	CD8 T	CD8 T	880_10_17	NTC	0.213204	-0.469629
ATCTGAGTCCATCTGT-0	Hepatocyte	Hepatocyte	880_45_70	NTC	2.22369	-0.0887455
ATCTGCAAGCTAAGTT-0	Kupffer	Kupffer+MonoMac+Endothelial	880_23_29	unassigned	1.90955	-1.00213
ATCTGGATCCCTCTGA-0	pDC	pDC	880_35_16	unassigned	-1.28488	-2.18454
ATCTGTTCACTTCACA-0	Endothelial	Kupffer+MonoMac+Endothelial	880_53_68	NTC	4.7452	1.51299
ATCTTCATCAGGACTC-0	Endothelial	Kupffer+MonoMac+Endothelial	880_38_70	unassigned	3.83533	0.830807
ATCTTCATCCGCAGAT-0	B cell	B cell	880_36_53	NTC	-0.161263	-0.960622
ATCTTCATCCTGATCT-0	Neutrophil	Neutrophil	880_18_51	NTC	0.751264	-1.19617
ATCTTGCTCCAGAGGA-0	Endothelial	Kupffer+MonoMac+Endothelial	880_7_46	NTC	1.63	-0.822644
ATCTTGCTCCGTCCTA-0	Mono/Mac	Kupffer+MonoMac+Endothelial	880_27_23	NTC	2.23819	0.456221
ATCTTGCTCGCATCAA-0	Endothelial	Kupffer+MonoMac+Endothelial	880_72_28	unassigned	2.15223	-0.431098
ATGAACGGTTGCGTCA-0	DC	DC	880_27_49	unassigned	0.200134	-1.2518
ATGACCCAGCGAGTAG-0	Kupffer	Kupffer+MonoMac+Endothelial	880_42_12	unassigned	3.16831	-0.223185
ATGACCCAGCGATGGA-0	Endothelial	Kupffer+MonoMac+Endothelial	880_62_24	unassigned	3.179	0.338723
ATGACCCAGTAGAGCG-0	Endothelial	Kupffer+MonoMac+Endothelial	880_43_33	Ifng	2.11186	-0.461372
ATGACGGAGCCTGGTG-0	Treg	Treg	880_1_45	NTC	2.92756	1.98847
ATGAGTAAGTCGACAC-0	CD8 T	CD8 T	880_73_44	unassigned	-0.345872	-1.10242
ATGAGTAAGTCGATGC-0	DC	DC	880_56_41	unassigned	1.44187	-0.0937782
ATGAGTTTCCTGCGTC-0	CD8 T	CD8 T	880_21_19	NTC	1.3338	0.798716
ATGATCCGTTAGAGTG-0	Neutrophil	Neutrophil	880_62_73	unassigned	0.251778	-1.53608
ATGATGAAGGTAGGTG-0	Endothelial	Kupffer+MonoMac+Endothelial	880_35_20	NTC	1.88138	-0.634175
ATGATGTTCACATGGC-0	Kupffer	Kupffer+MonoMac+Endothelial	880_1_71	NTC	3.58611	0.0353566
ATGATTGCAATCCGCT-0	Treg	Treg	880_79_18	NTC	1.6966	0.78346
ATGCAAGGTCAAGTCT-0	DC	DC	880_53_64	NTC	1.76101	0.203841
ATGCACGCAACCTGCT-0	DC	DC	880_48_43	NTC	0.663708	-0.819479
ATGCAGCTCGTGCGTG-0	Kupffer	Kupffer+MonoMac+Endothelial	880_67_44	unassigned	5.61027	1.28795
ATGCAGGAGGAGTCGA-0	Endothelial	Kupffer+MonoMac+Endothelial	880_57_44	NTC	4.11763	1.04247
ATGCAGGAGGTACCAC-0	CD8 T	CD8 T	880_32_43	NTC	0.510898	-0.132686
ATGCATTAGGAGGTTG-0	Endothelial	Kupffer+MonoMac+Endothelial	880_28_69	unassigned	3.99916	0.953637
ATGCATTAGGTGAGGC-0	Kupffer	Kupffer+MonoMac+Endothelial	880_33_21	unassigned	2.15074	-0.852882
ATGCCAATCATCACAG-0	DC	DC	880_5_47	unassigned	1.63189	0.0834217
ATGCCAGCAACCAGGC-0	CD8 T	CD8 T	880_49_69	NTC	0.194609	-0.490676
ATGCCAGCAGGATGCC-0	DC	DC	880_34_30	NTC	0.925149	-0.575665
ATGCCCAGTCAATCCG-0	Mono/Mac	Kupffer+MonoMac+Endothelial	880_75_17	unassigned	3.67851	1.69528
ATGCCCAGTTCGTGCA-0	Endothelial	Kupffer+MonoMac+Endothelial	880_19_19	unassigned	1.30616	-1.06545
ATGCCCTCAATAGGGA-0	DC	DC	880_33_67	NTC	2.90393	1.2697
ATGCCCTCAGGTTACG-0	Mono/Mac	Kupffer+MonoMac+Endothelial	880_23_58	unassigned	2.46404	0.650511
ATGCCTAAGCGAGTAG-0	NK	NK	880_53_44	unassigned	0.711201	-0.285682
ATGCCTAAGGAATGAC-0	Endothelial	Kupffer+MonoMac+Endothelial	880_38_70	unassigned	4.61721	1.41702
ATGCCTAAGGTAGGCA-0	CD8 T	CD8 T	880_65_27	NTC	0.234097	-0.445981
ATGCCTGGTAGTGCAA-0	Mono/Mac	Kupffer+MonoMac+Endothelial	880_19_40	unassigned	2.32295	0.529133
ATGCCTGGTTCGAATC-0	DC	DC	880_13_79	NTC	2.67981	1.06069
ATGCGAAGTAGCGATA-0	Endothelial	Kupffer+MonoMac+Endothelial	880_27_76	NTC	1.06045	-1.24967
ATGCGAAGTTAGCGTT-0	DC	DC	880_23_67	unassigned	0.950624	-0.551907
ATGCGAAGTTTCCTTG-0	NK	NK	880_71_11	unassigned	0.967238	0.0670991
ATGCTAACAATACGCG-0	NKT	NKT	880_19_51	NTC	0.897636	0.792993
ATGCTAGTCAGGAGAT-0	Mono/Mac	Kupffer+MonoMac+Endothelial	880_57_13	NTC	2.27776	0.490255
ATGCTCCCAGTACCGA-0	Neutrophil	Neutrophil	880_13_76	unassigned	-0.381806	-1.96726
ATGCTCCCATGACCCT-0	NK	NK	880_26_28	unassigned	1.09243	0.239603
ATGCTTAGTTAAGCAG-0	DC	DC	880_54_38	NTC	1.2168	-0.303676
ATGCTTGAGGTTGCCG-0	Kupffer	Kupffer+MonoMac+Endothelial	880_53_63	NTC	4.2435	0.442163
ATGGACCTCATCTCAC-0	Mono/Mac	Kupffer+MonoMac+Endothelial	880_69_51	Ifng	0.834207	-0.751585
ATGGACCTCCATTCCG-0	Kupffer	Kupffer+MonoMac+Endothelial	880_34_62	unassigned	3.03573	-0.305229
ATGGACCTCCGTCCAC-0	DC	DC	880_51_75	unassigned	3.17167	1.51939
ATGGACCTCGTGACCG-0	Mono/Mac	Kupffer+MonoMac+Endothelial	880_3_57	unassigned	3.31744	1.38467
ATGGACTCACCATGAG-0	DC	DC	880_43_18	NTC	1.54519	0.0025692
ATGGCCCGTTCCCTGT-0	Mono/Mac	Kupffer+MonoMac+Endothelial	880_21_49	unassigned	2.32156	0.527939
ATGGCGAAGCGATGTC-0	Kupffer	Kupffer+MonoMac+Endothelial	880_7_33	unassigned	1.97884	-0.959255
ATGGCGAAGCTATGGC-0	Endothelial	Kupffer+MonoMac+Endothelial	880_45_59	unassigned	3.21229	0.36368
ATGGCGAAGCTGGAGA-0	Kupffer	Kupffer+MonoMac+Endothelial	880_59_4	unassigned	5.72649	1.35987
ATGGCGAAGTGCAAGG-0	CD8 T	CD8 T	880_62_60	unassigned	1.59802	1.09777
ATGGCTTGTATGGTCT-0	NK	NK	880_61_41	NTC	0.731228	-0.258087
ATGGCTTGTATTAGGG-0	Endothelial	Kupffer+MonoMac+Endothelial	880_12_60	unassigned	2.43623	-0.218174
ATGGGCAAGGATTCGC-0	DC	DC	880_23_75	unassigned	2.13165	0.54949
ATGGGCAAGTTAGCTG-0	NK	NK	880_69_11	unassigned	-0.162809	-1.48994
ATGGGCTTCCGTGCGA-0	Mono/Mac	Kupffer+MonoMac+Endothelial	880_48_13	NTC	2.1631	0.391623
ATGGGCTTCGCTCCAC-0	DC	DC	880_64_51	unassigned	2.05128	0.474542
ATGGGTAGTGCGGTAG-0	CD8 T	CD8 T	880_51_73	unassigned	0.915691	0.325476
ATGGGTGAGGGTATCC-0	CD8 T	CD8 T	880_57_47	NTC	1.59785	1.09757
ATGGGTGAGGTAACTT-0	NK	NK	880_10_79	unassigned	1.7325	1.12151
ATGGTAAAGGCACGTT-0	T other	T other	880_27_63	unassigned	2.93664
ATGGTAAAGTATGATC-0	CD8 T	CD8 T	880_34_78	NTC	1.06649	0.496162
ATGGTAGGTTGTCCCT-0	Endothelial	Kupffer+MonoMac+Endothelial	880_24_46	NTC	2.69957	-0.0207288
ATGGTCATCGTGCAAC-0	Kupffer	Kupffer+MonoMac+Endothelial	880_62_15	unassigned	6.86772	2.06609
ATGGTCATCTCACTGT-0	Endothelial	Kupffer+MonoMac+Endothelial	880_31_28	unassigned	3.53988	0.609293
ATGGTGGAGGCGATCT-0	Erythrocytes	Erythrocytes	880_27_66	NTC	-0.627263	-0.223371
ATGGTTACAAGGTCGC-0	DC	DC	880_12_63	unassigned	1.24866	-0.273962
ATGGTTACACCTGCCA-0	Treg	Treg	880_54_9	unassigned	2.56262	1.63122
ATGTACCGTTAGCGTT-0	Mono/Mac	Kupffer+MonoMac+Endothelial	880_53_59	NTC	0.370741	-1.15029
ATGTACCGTTGAAGGC-0	DC	DC	880_42_27	NTC	1.95472	0.38449
ATGTCAACACATGAAC-0	Endothelial	Kupffer+MonoMac+Endothelial	880_40_22	unassigned	1.77924	-0.710753
ATGTCCTTCTAAGCAT-0	CD8 T	CD8 T	880_15_57	NTC	1.33005	0.794461
ATGTGAGGTCAGGAAC-0	Mono/Mac	Kupffer+MonoMac+Endothelial	880_53_66	unassigned	3.83807	1.83255
ATGTGAGGTGGCTGTC-0	Kupffer	Kupffer+MonoMac+Endothelial	880_59_48	unassigned	5.01831	0.921632
ATGTGCATCTGGCTAA-0	Neutrophil	Neutrophil	880_53_7	unassigned	1.48387	-0.697603
ATGTGGCTCCGCCTTA-0	Kupffer	Kupffer+MonoMac+Endothelial	880_25_77	unassigned	-0.304335	-2.37213
ATGTGGGAGGGTAGAT-0	CD4 T	CD4 T	880_36_25	NTC	1.24818	0.679593
ATGTGTTAGGTGCGTT-0	Mono/Mac	Kupffer+MonoMac+Endothelial	880_75_45	NTC	3.27451	1.34773
ATTAAGCTCAGCTATG-0	Endothelial	Kupffer+MonoMac+Endothelial	880_45_26	unassigned	3.91796	0.892762
ATTAAGCTCCGCTGCT-0	Mono/Mac	Kupffer+MonoMac+Endothelial	880_46_68	unassigned	0.792307	-0.787631
ATTACCCTCCCTGTAT-0	Mono/Mac	Kupffer+MonoMac+Endothelial	880_39_73	unassigned	2.05609	0.299562
ATTACCCTCGCGCTGA-0	Endothelial	Kupffer+MonoMac+Endothelial	880_43_74	unassigned	3.45067	0.54241
ATTACCTCAATCTCCA-0	Mono/Mac	Kupffer+MonoMac+Endothelial	880_51_36	unassigned	3.42265	1.47518
ATTACCTCAGTAATCA-0	Mono/Mac	Kupffer+MonoMac+Endothelial	880_25_74	unassigned	3.38505	1.44283
ATTACGTAGCTGGATC-0	Endothelial	Kupffer+MonoMac+Endothelial	880_71_8	NTC	2.85933	0.0990464
ATTACGTAGCTTCCTG-0	CD8 T	CD8 T	880_44_13	NTC	0.290417	-0.382235
ATTACGTAGGAGGTCA-0	NK	NK	880_31_14	unassigned	1.40928	0.676164
ATTACGTAGGTGCAGA-0	Mono/Mac	Kupffer+MonoMac+Endothelial	880_40_16	unassigned	1.52624	-0.156253
ATTACTGGTGAGTAGC-0	Mono/Mac	Kupffer+MonoMac+Endothelial	880_51_22	unassigned	1.84997	0.12224
ATTACTGGTGCACCAC-0	Endothelial	Kupffer+MonoMac+Endothelial	880_36_63	NTC	3.15358	0.319665
ATTACTGGTTATGTGC-0	Endothelial	Kupffer+MonoMac+Endothelial	880_52_48	NTC	3.65336	0.694378
ATTATCCCAATACTAG-0	Kupffer	Kupffer+MonoMac+Endothelial	880_40_25	NTC	3.51078	-0.0112614
ATTATCCCATGGATGT-0	NKT	NKT	880_0_67	unassigned	-0.799851	-2.17699
ATTATCCCATTACGCC-0	Kupffer	Kupffer+MonoMac+Endothelial	880_51_19	NTC	1.16665	-1.46185
ATTCACCTCAGCGATC-0	Endothelial	Kupffer+MonoMac+Endothelial	880_38_70	unassigned	3.04213	0.236104
ATTCACCTCATGAGTT-0	Endothelial	Kupffer+MonoMac+Endothelial	880_14_60	NTC	3.0539	0.244925
ATTCACCTCTAGGCCG-0	DC	DC	880_45_54	NTC	-0.061261	-1.49557
ATTCAGGTCTAGCGCG-0	CD8 T	CD8 T	880_32_14	unassigned	0.844532	0.244936
ATTCATCCACCTGTCG-0	Mono/Mac	Kupffer+MonoMac+Endothelial	880_40_17	unassigned	1.70211	-0.00495627
ATTCATCCATGGCGAC-0	DC	DC	880_79_35	unassigned	0.428524	-1.03881
ATTCATGGTTTCCTGC-0	Endothelial	Kupffer+MonoMac+Endothelial	880_11_51	NTC	5.71809	2.24241
ATTCCAAGTAGGTTAG-0	Endothelial	Kupffer+MonoMac+Endothelial	880_13_54	NTC	2.75474	0.0206304
ATTCCAAGTGCAGTCC-0	Endothelial	Kupffer+MonoMac+Endothelial	880_39_20	NTC	3.32389	0.447358
ATTCCAAGTGCATTCG-0	Endothelial	Kupffer+MonoMac+Endothelial	880_31_75	NTC	1.71256	-0.760744
ATTCCAAGTTGCTCCT-0	Mono/Mac	Kupffer+MonoMac+Endothelial	880_45_54	NTC	2.79065	0.931483
ATTCCAAGTTGGAGAC-0	Kupffer	Kupffer+MonoMac+Endothelial	880_54_7	unassigned	3.72617	0.122026
ATTCCAAGTTTGATGC-0	Kupffer	Kupffer+MonoMac+Endothelial	880_36_67	unassigned	2.87474	-0.404856
ATTCCGCCAAGCCGGT-0	Kupffer	Kupffer+MonoMac+Endothelial	880_7_77	unassigned	6.28096	1.70298
ATTCCGCCACTCGCCA-0	Mono/Mac	Kupffer+MonoMac+Endothelial	880_16_18	unassigned	1.85824	0.129363
ATTCCGGGTATGTGCT-0	CD8 T	CD8 T	880_30_27	unassigned	0.336365	-0.33023
ATTCCTTGTAATCCAC-0	Mono/Mac	Kupffer+MonoMac+Endothelial	880_62_48	unassigned	-0.0441068	-1.50717
ATTCGATAGCATGGCT-0	Mono/Mac	Kupffer+MonoMac+Endothelial	880_0_61	unassigned	1.90652	0.170897
ATTCGATAGCGAATGG-0	Kupffer	Kupffer+MonoMac+Endothelial	880_26_51	NTC	2.16567	-0.843639
ATTCGCTTCTAGGCAC-0	Mono/Mac	Kupffer+MonoMac+Endothelial	880_3_34	unassigned	1.01595	-0.59524
ATTCGGGCACAGCAGC-0	NK	NK	880_4_20	unassigned	2.52874	2.21862
ATTCGTAGTAGTCCTG-0	CD8 T	CD8 T	880_68_53	unassigned	-0.147584	-0.877985
ATTCGTAGTTTGAGGA-0	B cell	B cell	880_42_44	unassigned	0.415182	-0.337691
ATTCGTTCACATTCAT-0	CD8 T	CD8 T	880_36_68	unassigned	0.873169	0.277349
ATTCGTTCATGGCAGC-0	B cell	B cell	880_64_47	unassigned	0.098188	-0.680248
ATTCTCATCGATGACC-0	Endothelial	Kupffer+MonoMac+Endothelial	880_62_64	unassigned	2.30045	-0.31997
ATTGAGAAGCGATACC-0	CD8 T	CD8 T	880_37_72	Ifng	0.120328	-0.57475
ATTGAGAAGGTACCCG-0	Kupffer	Kupffer+MonoMac+Endothelial	880_61_61	unassigned	1.23623	-1.4188
ATTGAGGGTGCAGCCT-0	Mono/Mac	Kupffer+MonoMac+Endothelial	880_79_25	unassigned	4.9501	2.78919
ATTGATGCACCAATCC-0	NKT	NKT	880_0_54	unassigned	0.0454603	-0.698001
ATTGATGCATGGCTCT-0	CD8 T	CD8 T	880_3_46	unassigned	1.00848	0.430502
ATTGCCCCAAACCATA-0	B cell	B cell	880_0_64	NTC	2.39728	1.80425
ATTGCCCCAATAGTGC-0	Mono/Mac	Kupffer+MonoMac+Endothelial	880_56_53	unassigned	0.359719	-1.15977
ATTGCCCCACCTTACA-0	Treg	Treg	880_22_52	unassigned	0.952242	0.054794
ATTGCCCCATCAATTC-0	Hepatocyte	Hepatocyte	880_1_63	NTC	2.62682	0.287317
ATTGCCTTCAAGTAGA-0	Kupffer	Kupffer+MonoMac+Endothelial	880_45_70	NTC	2.56554	-0.596195
ATTGCCTTCAATGTAC-0	Endothelial	Kupffer+MonoMac+Endothelial	880_67_21	NTC	0.788797	-1.45334
ATTGCCTTCCATCTAC-0	Mono/Mac	Kupffer+MonoMac+Endothelial	880_33_16	unassigned	2.69167	0.846333
ATTGGCGCAACCTTCA-0	Endothelial	Kupffer+MonoMac+Endothelial	880_41_22	unassigned	3.50267	0.581396
ATTGGCTGTTAGGTAG-0	Endothelial	Kupffer+MonoMac+Endothelial	880_12_70	unassigned	4.05791	0.997686
ATTGGCTGTTCCTCGT-0	Neutrophil	Neutrophil	880_38_22	NTC	2.52258	0.0092764
ATTGGCTGTTTCGACG-0	Kupffer	Kupffer+MonoMac+Endothelial	880_3_59	unassigned	2.51636	-0.626626
ATTGGTTAGGATACTT-0	CD8 T	CD8 T	880_17_52	NTC	-0.759773	-1.57089
ATTGGTTAGGCAACGA-0	CD8 T	CD8 T	880_57_47	NTC	3.57313	3.33328
ATTGGTTAGGCGCTAT-0	Kupffer	Kupffer+MonoMac+Endothelial	880_64_25	NTC	2.07809	-0.897835
ATTGTCAGTGACTCTG-0	Mono/Mac	Kupffer+MonoMac+Endothelial	880_64_36	unassigned	1.08135	-0.538978
CAAACCCAGATTCGTG-0	Mono/Mac	Kupffer+MonoMac+Endothelial	880_40_59	NTC	1.26321	-0.382528
CAAACCCAGCGATCTA-0	Hepatocyte	Hepatocyte	880_53_64	NTC	1.16155	-1.07955
CAAACCCAGTGACCAC-0	Kupffer	Kupffer+MonoMac+Endothelial	880_34_21	unassigned	3.57946	0.0312388
CAAACCTGTGGGTCGA-0	DC	DC	880_57_52	unassigned	0.678638	-0.805555
CAAACCTGTTGTCTAA-0	Mono/Mac	Kupffer+MonoMac+Endothelial	880_31_16	unassigned	2.07962	0.319807
CAAACGGAGATAGTTC-0	Mono/Mac	Kupffer+MonoMac+Endothelial	880_52_16	NTC	2.75688	0.902433
CAAACGGAGGTACGAG-0	Mono/Mac	Kupffer+MonoMac+Endothelial	880_72_24	NTC	0.786857	-0.792319
CAAACGGAGTTGCGGT-0	Kupffer	Kupffer+MonoMac+Endothelial	880_77_41	unassigned	2.41919	-0.686755
CAAACTTAGGATATGA-0	B cell	B cell	880_19_23	NTC	1.45615	0.787224
CAAAGCGAGCGAGTCT-0	Kupffer	Kupffer+MonoMac+Endothelial	880_68_41	unassigned	4.32073	0.489951
CAAAGCGAGGTTAGGG-0	Kupffer	Kupffer+MonoMac+Endothelial	880_2_52	unassigned	3.64035	0.0689183
CAAAGCTCAACTAATG-0	Mono/Mac	Kupffer+MonoMac+Endothelial	880_68_74	unassigned	0.635652	-0.922397
CAAAGCTCAAGTGGAA-0	pDC	pDC	880_35_30	NTC	0.202638	-0.3379
CAAAGGCGTTCCGTCT-0	Endothelial	Kupffer+MonoMac+Endothelial	880_10_51	NTC	1.50786	-0.914219
CAAAGGGTCCAGAGCT-0	CD4 T	CD4 T	880_6_67	NTC	3.03044	2.69436
CAAAGTAAGCCAGGAA-0	Mono/Mac	Kupffer+MonoMac+Endothelial	880_47_44	NTC	1.76213	0.0466753
CAAATCACAGGTTCAG-0	Kupffer	Kupffer+MonoMac+Endothelial	880_44_44	NTC	2.76392	-0.473434
CAAATCCGTGAGTGAC-0	DC	DC	880_30_20	NTC	0.0879404	-1.35643
CAAATGAAGCATTAGT-0	NKT	NKT	880_71_24	NTC	0.158245	-0.50067
CAAATGGGTTAAGGTG-0	Treg	Treg	880_45_74	unassigned	-0.519683	-1.3861
CAAATGGGTTATCCAA-0	Neutrophil	Neutrophil	880_70_17	unassigned	2.05587	-0.308339
CAAATGTTCCGCCTTA-0	Mono/Mac	Kupffer+MonoMac+Endothelial	880_71_8	NTC	3.16336	1.25212
CAAATGTTCTGGTAAT-0	Kupffer	Kupffer+MonoMac+Endothelial	880_54_30	unassigned	5.93746	1.49042
CAAATTCAGGTCGATC-0	DC	DC	880_9_73	NTC	1.26483	-0.258887
CAAATTCAGTCGCTAA-0	Mono/Mac	Kupffer+MonoMac+Endothelial	880_59_11	unassigned	0.788323	-0.791058
CAACACGCAAAGGTGA-0	CD8 T	CD8 T	880_76_31	NTC	0.86877	0.272369
CAACACGCACATAGGT-0	Mono/Mac	Kupffer+MonoMac+Endothelial	880_75_16	unassigned	0.214005	-1.28513
CAACACGCACCTTAGC-0	Kupffer	Kupffer+MonoMac+Endothelial	880_77_22	NTC	3.04263	-0.300962
CAACACGCAGCACCTT-0	Endothelial	Kupffer+MonoMac+Endothelial	880_36_64	NTC	2.85673	0.0970997
CAACACGCATAATCTC-0	Endothelial	Kupffer+MonoMac+Endothelial	880_32_77	NTC	0.919159	-1.3556
CAACAGTCACTACCTA-0	CD8 T	CD8 T	880_72_15	unassigned	1.46604	0.94839
CAACATTAGCGCTTAA-0	Kupffer	Kupffer+MonoMac+Endothelial	880_70_25	NTC	6.19656	1.65076
CAACCAGCACTAGTAA-0	Kupffer	Kupffer+MonoMac+Endothelial	880_54_60	NTC	2.88768	-0.396845
CAACCAGCATCACACC-0	Kupffer	Kupffer+MonoMac+Endothelial	880_47_34	unassigned	4.65619	0.697545
CAACCCAGTGCGGACA-0	CD8 T	CD8 T	880_43_64	NTC	0.00284206	-0.707726
CAACCCTCAATACAGC-0	Kupffer	Kupffer+MonoMac+Endothelial	880_76_38	unassigned	6.34543	1.74288
CAACCCTCACAGGGCT-0	CD8 T	CD8 T	880_5_48	NTC	-0.155886	-0.887381
CAACCCTCACCAATCC-0	CD8 T	CD8 T	880_69_18	unassigned	-0.15729	-0.88897
CAACGAAGTTGTAGAG-0	DC	DC	880_55_20	Ifng	2.47973	0.874099
CAACGATCATCACTGC-0	Mono/Mac	Kupffer+MonoMac+Endothelial	880_0_62	unassigned	2.79743	0.937313
CAACGATCATCCTGTA-0	Neutrophil	Neutrophil	880_69_9	unassigned	0.979968	-1.04053
CAACGGGGTCATCGGC-0	Endothelial	Kupffer+MonoMac+Endothelial	880_0_78	unassigned	3.70313	0.731694
CAACGGGGTGAGATAT-0	Mono/Mac	Kupffer+MonoMac+Endothelial	880_78_45	unassigned	1.35503	-0.303538
CAACTAACATGAGCGC-0	DC	DC	880_36_16	Ifng	1.30031	-0.225799
CAACTAGTCGCGAGTT-0	Mono/Mac	Kupffer+MonoMac+Endothelial	880_24_65	Ifng	2.12198	0.356245
CAACTGATCACCTGGG-0	Mono/Mac	Kupffer+MonoMac+Endothelial	880_54_52	NTC	3.17855	1.26518
CAACTGATCCCAGATA-0	Endothelial	Kupffer+MonoMac+Endothelial	880_48_26	NTC	1.3238	-1.05222
CAACTGATCGATCCTT-0	Endothelial	Kupffer+MonoMac+Endothelial	880_25_23	NTC	2.60511	-0.0915557
CAAGACTCAACCAGGC-0	Endothelial	Kupffer+MonoMac+Endothelial	880_65_46	NTC	1.58363	-0.857408
CAAGCAAGTGCGATGG-0	Kupffer	Kupffer+MonoMac+Endothelial	880_45_74	unassigned	4.50719	0.605342
CAAGCAAGTGGAGCTG-0	Mono/Mac	Kupffer+MonoMac+Endothelial	880_57_41	unassigned	4.02935	1.9971
CAAGCAAGTGGGTATA-0	Mono/Mac	Kupffer+MonoMac+Endothelial	880_47_62	NTC	1.44489	-0.226233
CAAGCCACAAGTGGAA-0	B cell	B cell	880_44_28	NTC	1.84705	1.20965
CAAGCCCGTAATGAGT-0	Kupffer	Kupffer+MonoMac+Endothelial	880_32_72	unassigned	0.521818	-1.86089
CAAGCCCGTATTGCTA-0	CD8 T	CD8 T	880_37_62	NTC	0.651905	0.0269119
CAAGCCCGTCATGGTT-0	Mono/Mac	Kupffer+MonoMac+Endothelial	880_0_61	unassigned	3.81576	1.81335
CAAGCGAAGCAGGTAG-0	DC	DC	880_33_66	unassigned	3.69757	2.00983
CAAGCGGGTAAGTGTG-0	CD8 T	CD8 T	880_57_26	unassigned	0.17299	-0.515145
CAAGCTCAGGAGTATA-0	Mono/Mac	Kupffer+MonoMac+Endothelial	880_53_16	NTC	1.898	0.163565
CAAGCTGCAGGACACC-0	Kupffer	Kupffer+MonoMac+Endothelial	880_40_14	unassigned	3.39293	-0.0841857
CAAGGAACATAAGCCG-0	Endothelial	Kupffer+MonoMac+Endothelial	880_27_32	unassigned	1.73626	-0.742975
CAAGGATAGCGAGTTC-0	Mono/Mac	Kupffer+MonoMac+Endothelial	880_56_49	unassigned	1.44172	-0.228957
CAAGGATAGTAGCACC-0	CD8 T	CD8 T	880_32_15	unassigned	-0.0520015	-0.7698
CAAGGGATCAGTTAGT-0	DC	DC	880_25_63	Ifng	2.14767	0.564431
CAAGGGATCTAAGTGT-0	Hepatocyte	Hepatocyte	880_19_78	NTC	1.73488	-0.544728
CAAGGGGCAATAGCAC-0	Endothelial	Kupffer+MonoMac+Endothelial	880_28_28	NTC	2.62761	-0.0746802
CAAGGGGCATTCGTAT-0	Endothelial	Kupffer+MonoMac+Endothelial	880_37_64	NTC	3.10031	0.279722
CAAGGTAGTGATAGAT-0	Kupffer	Kupffer+MonoMac+Endothelial	880_23_52	unassigned	1.44872	-1.28731
CAAGGTAGTGCAGCGA-0	Mono/Mac	Kupffer+MonoMac+Endothelial	880_14_71	unassigned	2.6976	0.851435
CAAGGTGAGGTTGGAG-0	DC	DC	880_64_20	unassigned	3.08232	1.43606
CAAGGTTCAGCTCAAG-0	Treg	Treg	880_16_72	Ifng	0.187439	-0.693887
CAAGGTTCATCCTGCG-0	DC	DC	880_24_67	unassigned	1.67618	0.124728
CAAGGTTCATTGACGG-0	DC	DC	880_51_22	unassigned	0.309036	-1.15024
CAAGTAAAGAACGGCA-0	CD8 T	CD8 T	880_16_66	unassigned	0.768178	0.158515
CAAGTAAAGCGACTTA-0	CD8 T	CD8 T	880_29_19	unassigned	-0.38677	-1.14871
CAAGTAAAGGTTCGGT-0	Mono/Mac	Kupffer+MonoMac+Endothelial	880_61_55	Ifng	2.43923	0.629164
CAAGTAGGTGGCGTGA-0	DC	DC	880_45_59	unassigned	1.52476	-0.0164855
CAAGTCATCCACGGAT-0	CD8 T	CD8 T	880_79_13	NTC	1.43131	0.909081
CAAGTCATCTATGGAT-0	DC	DC	880_54_16	unassigned	1.68187	0.130037
CAAGTCGCAATTAACG-0	Mono/Mac	Kupffer+MonoMac+Endothelial	880_29_50	NTC	0.448955	-1.08301
CAAGTCGCAATTCAAG-0	pDC	pDC	880_64_25	NTC	0.493902	0.0236829
CAAGTCGCAATTCATC-0	Mono/Mac	Kupffer+MonoMac+Endothelial	880_36_15	unassigned	1.35815	-0.300853
CAAGTCTGTAGTAAGT-0	CD8 T	CD8 T	880_34_29	NTC	4.32132	4.18011
CAAGTGAGTTAACTGC-0	CD8 T	CD8 T	880_1_32	unassigned	0.554441	-0.083402
CAAGTGAGTTCGATGT-0	Mono/Mac	Kupffer+MonoMac+Endothelial	880_18_25	NTC	2.03001	0.277127
CAAGTTACAAGCCGAC-0	Kupffer	Kupffer+MonoMac+Endothelial	880_68_12	unassigned	2.86887	-0.408483
CAAGTTACACCTGTAC-0	HPC	HPC	880_18_63	unassigned	-0.0805752
CAAGTTACAGCACGTA-0	Mono/Mac	Kupffer+MonoMac+Endothelial	880_49_25	NTC	3.30797	1.37652
CAAGTTTAGCCCTGCT-0	CD8 T	CD8 T	880_14_60	NTC	-0.0505122	-0.768115
CAAGTTTAGTGATCGC-0	Kupffer	Kupffer+MonoMac+Endothelial	880_71_40	Ifng	4.8915	0.843155
CAATAGAAGAACGACG-0	Mono/Mac	Kupffer+MonoMac+Endothelial	880_79_46	unassigned	2.62474	0.788753
CAATAGAAGCGATGTC-0	NK	NK	880_64_52	unassigned	-0.0905506	-1.39038
CAATAGAAGGGGACTA-0	Mono/Mac	Kupffer+MonoMac+Endothelial	880_75_17	unassigned	1.72187	0.0120445
CAATAGAAGTTAGCTG-0	NKT	NKT	880_52_37	NTC	0.59061	0.255811
CAATAGCCAACTGGTG-0	B cell	B cell	880_30_28	unassigned	1.6215	0.965912
CAATAGCCAATGAGCT-0	Kupffer	Kupffer+MonoMac+Endothelial	880_50_61	NTC	6.4231	1.79094
CAATATCAGCAAGGCA-0	CD8 T	CD8 T	880_1_51	unassigned	-0.394565	-1.15753
CAATATCAGCCAGGAA-0	pDC	pDC	880_0_61	unassigned	1.1399	0.825643
CAATATCAGCCTTCGC-0	Kupffer	Kupffer+MonoMac+Endothelial	880_70_12	unassigned	5.70346	1.34561
CAATCCCCATCACTGC-0	Endothelial	Kupffer+MonoMac+Endothelial	880_57_61	NTC	3.9161	0.891362
CAATCCGGTATTGCTA-0	Mono/Mac	Kupffer+MonoMac+Endothelial	880_39_15	unassigned	2.66087	0.81984
CAATCCGGTTCCGTAG-0	Kupffer	Kupffer+MonoMac+Endothelial	880_40_69	unassigned	2.96824	-0.346994
CAATCCGGTTTCCGAG-0	Mono/Mac	Kupffer+MonoMac+Endothelial	880_75_35	NTC	-0.089286	-1.54604
CAATCGATCACCACTT-0	Cholangiocyte	Cholangiocyte	880_47_33	unassigned	1.42636
CAATCGATCCGCCACT-0	Kupffer	Kupffer+MonoMac+Endothelial	880_5_47	unassigned	3.19909	-0.204138
CAATCTTCATCGAAGT-0	Endothelial	Kupffer+MonoMac+Endothelial	880_16_20	NTC	2.72102	-0.00464851
CAATGCATCCCGCACT-0	Mono/Mac	Kupffer+MonoMac+Endothelial	880_68_39	NTC	0.402292	-1.12315
CAATGGCTCGATCCTT-0	DC	DC	880_56_36	unassigned	2.61455	0.999831
CAATGGCTCTAACTCC-0	CD4 T	CD4 T	880_25_52	NTC	0.741349	0.106638
CAATGGGAGGATAGCG-0	Kupffer	Kupffer+MonoMac+Endothelial	880_36_21	NTC	5.90441	1.46996
CAATGGGAGTAGGCAG-0	B cell	B cell	880_73_28	NTC	0.231549	-0.536133
CAATGTTAGCCCTACC-0	Mono/Mac	Kupffer+MonoMac+Endothelial	880_14_78	NTC	0.986541	-0.620538
CAATTAGCATAACGTA-0	Kupffer	Kupffer+MonoMac+Endothelial	880_68_2	unassigned	2.5457	-0.608468
CAATTCCTCCCCATAT-0	Kupffer	Kupffer+MonoMac+Endothelial	880_62_15	unassigned	2.05075	-0.914757
CAATTTCCACAGCCTT-0	DC	DC	880_77_44	unassigned	2.06434	0.48672
CAATTTCCACATAGGT-0	Mono/Mac	Kupffer+MonoMac+Endothelial	880_16_50	NTC	-0.139896	-1.58958
CACAACATCACGCCGA-0	Mono/Mac	Kupffer+MonoMac+Endothelial	880_19_20	unassigned	3.71812	1.72936
CACAACATCAGGAGTG-0	Kupffer	Kupffer+MonoMac+Endothelial	880_18_50	NTC	3.18123	-0.215193
CACAAGCTCCGTGGCA-0	Mono/Mac	Kupffer+MonoMac+Endothelial	880_5_76	NTC	1.35481	-0.303724
CACAAGCTCTATCGGA-0	pDC	pDC	880_10_51	NTC	0.0363705	-0.544308
CACAAGTCAGCTATGG-0	Kupffer	Kupffer+MonoMac+Endothelial	880_0_60	unassigned	0.670529	-1.76886
CACAATTAGGGGACTA-0	CD8 T	CD8 T	880_53_36	unassigned	0.148371	-0.54301
CACAATTAGGGGCAAC-0	Mono/Mac	Kupffer+MonoMac+Endothelial	880_53_26	unassigned	1.09129	-0.530426
CACAATTAGTAACCTG-0	NK	NK	880_40_69	unassigned	0.482269	-0.601117
CACAATTAGTCGCATA-0	Endothelial	Kupffer+MonoMac+Endothelial	880_46_52	unassigned	3.20395	0.357428
CACAATTAGTTACGAT-0	Endothelial	Kupffer+MonoMac+Endothelial	880_50_20	NTC	1.3667	-1.02005
CACACAATCACTCTCG-0	CD8 T	CD8 T	880_42_65	NTC	0.20762	-0.475949
CACACACAGAACGGTG-0	Mono/Mac	Kupffer+MonoMac+Endothelial	880_50_56	NTC	1.14583	-0.483504
CACACACAGGATGTCC-0	Kupffer	Kupffer+MonoMac+Endothelial	880_68_3	unassigned	0.421102	-1.92321
CACACACAGTGCAAGG-0	Mono/Mac	Kupffer+MonoMac+Endothelial	880_77_40	unassigned	1.71291	0.00433929
CACACAGCACCTTCGG-0	Neutrophil	Neutrophil	880_49_58	NTC	4.24038	1.1783
CACACAGCACTACCTA-0	NK	NK	880_32_36	Ifng	0.45929	-0.632779
CACACCCTCCCATACT-0	CD8 T	CD8 T	880_49_33	unassigned	1.2068	0.654967
CACACCTCATGACAGT-0	Kupffer	Kupffer+MonoMac+Endothelial	880_59_24	unassigned	2.67813	-0.526518
CACACCTCATTAGCTT-0	CD4 T	CD4 T	880_15_57	NTC	1.04244	0.447009
CACACTAAGTTAGGAA-0	DC	DC	880_55_54	NTC	2.52595	0.917205
CACAGGCCAAGGTGCC-0	NK	NK	880_2_52	unassigned	0.210445	-0.975652
CACAGGCCAAGGTTCG-0	B cell	B cell	880_0_61	unassigned	1.05373	0.352347
CACAGGCCAATACCGG-0	Endothelial	Kupffer+MonoMac+Endothelial	880_39_48	unassigned	1.71624	-0.757985
CACAGGCCACCTTACA-0	Mono/Mac	Kupffer+MonoMac+Endothelial	880_54_10	unassigned	2.35373	0.555617
CACAGGCCAGTAATCA-0	Mono/Mac	Kupffer+MonoMac+Endothelial	880_34_22	unassigned	1.60161	-0.0914154
CACAGGTTCCTTCCTC-0	DC	DC	880_5_77	unassigned	2.50112	0.894051
CACATAACAAGCGGAG-0	CD8 T	CD8 T	880_68_14	unassigned	-0.197465	-0.934443
CACATAGTCAAGTAGA-0	DC	DC	880_15_76	NTC	2.22348	0.635132
CACATAGTCACAGGGA-0	Kupffer	Kupffer+MonoMac+Endothelial	880_35_74	NTC	0.571911	-1.82989
CACATAGTCCACCGGA-0	Mono/Mac	Kupffer+MonoMac+Endothelial	880_36_12	NTC	2.99249	1.10512
CACATAGTCCTGTATC-0	Endothelial	Kupffer+MonoMac+Endothelial	880_59_44	NTC	3.00125	0.205457
CACATAGTCTATCTGC-0	Mono/Mac	Kupffer+MonoMac+Endothelial	880_22_53	NTC	2.72469	0.874737
CACATATAGGCACGTT-0	DC	DC	880_55_54	NTC	1.09213	-0.419941
CACATCAAGAATCCAT-0	Endothelial	Kupffer+MonoMac+Endothelial	880_47_79	unassigned	-0.0997397	-2.11952
CACATCAAGCTATACG-0	Neutrophil	Neutrophil	880_44_9	unassigned	0.849894	-1.12905
CACATCAAGGAATTGA-0	Endothelial	Kupffer+MonoMac+Endothelial	880_55_25	unassigned	3.03625	0.231692
CACATTGAGGCAAGCA-0	Endothelial	Kupffer+MonoMac+Endothelial	880_55_53	unassigned	4.7836	1.54178
CACATTGAGTGAATCT-0	Endothelial	Kupffer+MonoMac+Endothelial	880_51_79	unassigned	3.32064	0.444917
CACATTTCAATTACCT-0	Treg	Treg	880_50_21	unassigned	0.582994	-0.30667
CACATTTCAGCACTCT-0	Endothelial	Kupffer+MonoMac+Endothelial	880_10_73	NTC	3.76031	0.774562
CACATTTCATCCGCTG-0	Mono/Mac	Kupffer+MonoMac+Endothelial	880_19_21	NTC	2.01554	0.264683
CACCAAATCAATGTAC-0	Mono/Mac	Kupffer+MonoMac+Endothelial	880_16_77	NTC	3.38188	1.4401
CACCACCTCCTGGTCC-0	CD8 T	CD8 T	880_55_38	NTC	-0.0223357	-0.736223
CACCAGACAATAGGAG-0	DC	DC	880_56_53	unassigned	1.63051	0.0821407
CACCAGACAATGTGCG-0	Kupffer	Kupffer+MonoMac+Endothelial	880_72_2	unassigned	2.89528	-0.392142
CACCAGACACCTTAAT-0	DC	DC	880_0_61	unassigned	2.93105	1.29499
CACCAGTAGCCACAGT-0	Mono/Mac	Kupffer+MonoMac+Endothelial	880_64_25	NTC	2.36941	0.5691
CACCAGTAGCTATCTC-0	Endothelial	Kupffer+MonoMac+Endothelial	880_13_46	unassigned	3.14784	0.315358
CACCAGTAGGAACTGG-0	DC	DC	880_71_53	NTC	0.574076	-0.903067
CACCAGTAGGGGATTG-0	NK	NK	880_42_73	NTC	0.355234	-0.776153
CACCAGTAGTCTCTGT-0	CD8 T	CD8 T	880_59_36	unassigned	0.444385	-0.207968
CACCATAAGCGCCTTC-0	Kupffer	Kupffer+MonoMac+Endothelial	880_19_48	unassigned	4.56681	0.642236
CACCATAAGTACGCTA-0	Endothelial	Kupffer+MonoMac+Endothelial	880_55_52	NTC	2.82794	0.0755118
CACCATAAGTAGCTGC-0	Mono/Mac	Kupffer+MonoMac+Endothelial	880_33_16	unassigned	1.25839	-0.386673
CACCATCCAACCCGAA-0	Kupffer	Kupffer+MonoMac+Endothelial	880_36_12	NTC	4.64975	0.693555
CACCATCCACTATGAA-0	Mono/Mac	Kupffer+MonoMac+Endothelial	880_37_75	unassigned	1.02671	-0.585977
CACCATCCATCCAAGG-0	Kupffer	Kupffer+MonoMac+Endothelial	880_53_64	NTC	2.13871	-0.860323
CACCCAAGTAAGCTGA-0	DC	DC	880_4_72	unassigned	0.923385	-0.57731
CACCCAAGTATGGTAG-0	DC	DC	880_0_61	unassigned	2.96955	1.33089
CACCCATCAAACCTGG-0	Endothelial	Kupffer+MonoMac+Endothelial	880_13_18	NTC	2.24176	-0.363976
CACCCATCAACTGCGA-0	Kupffer	Kupffer+MonoMac+Endothelial	880_6_47	unassigned	3.36974	-0.0985408
CACCCATCAAGCTGTG-0	Kupffer	Kupffer+MonoMac+Endothelial	880_0_43	unassigned	4.19636	0.41299
CACCCGTTCAGTAATC-0	CD8 T	CD8 T	880_34_13	NTC	4.6852	4.59198
CACCCTGCACTAGGTG-0	CD8 T	CD8 T	880_43_56	NTC	1.31408	0.776396
CACCCTTGTTCCCAAG-0	Neutrophil	Neutrophil	880_42_43	unassigned	0.00491277	-1.70409
CACCGAACAAAGGACA-0	CD8 T	CD8 T	880_34_21	unassigned	4.61772	4.51559
CACCGATAGCCTAGAC-0	Kupffer	Kupffer+MonoMac+Endothelial	880_73_8	NTC	4.16346	0.392629
CACCGATAGCGGCATT-0	pDC	pDC	880_27_59	unassigned	0.398423	-0.0948469
CACCGCAAGAACCTGC-0	Mono/Mac	Kupffer+MonoMac+Endothelial	880_54_11	unassigned	2.54782	0.722585
CACCGCAAGAATCGCC-0	Mono/Mac	Kupffer+MonoMac+Endothelial	880_38_24	NTC	2.11378	0.349194
CACCGCAAGCGCTTGG-0	Treg	Treg	880_64_40	unassigned	-0.831573	-1.69142
CACCGCAAGTCATCTC-0	CD8 T	CD8 T	880_63_34	Ifng	-0.691683	-1.49382
CACCGCAAGTTACGTG-0	DC	DC	880_33_53	NTC	2.23702	0.647757
CACCGTAGTGGCTCGT-0	CD8 T	CD8 T	880_5_68	unassigned	0.54601	-0.0929447
CACCGTAGTTCAAGCT-0	CD8 T	CD8 T	880_35_23	NTC	0.909572	0.318551
CACCTAAAGGTATGAA-0	Treg	Treg	880_39_15	unassigned	1.63973	0.727789
CACCTAAAGTTGCTCT-0	Mono/Mac	Kupffer+MonoMac+Endothelial	880_12_63	unassigned	2.21329	0.4348
CACCTATTCATAGGTT-0	Endothelial	Kupffer+MonoMac+Endothelial	880_70_41	unassigned	2.93754	0.15769
CACCTATTCGTGCTCC-0	Endothelial	Kupffer+MonoMac+Endothelial	880_41_20	NTC	2.46718	-0.194968
CACCTATTCTCACAGA-0	Kupffer	Kupffer+MonoMac+Endothelial	880_66_14	unassigned	5.84886	1.43559
CACCTCGCAACTGGTG-0	CD8 T	CD8 T	880_59_25	unassigned	0.401657	-0.25633
CACCTCGCATGGTCCT-0	DC	DC	880_12_18	NTC	1.46678	-0.0705499
CACCTCTGTTGCGAGG-0	Endothelial	Kupffer+MonoMac+Endothelial	880_43_30	NTC	3.51365	0.589631
CACGACCGTTGAATCC-0	NK	NK	880_0_70	NTC	1.26104	0.471913
CACGACTAGTCGCTGG-0	CD8 T	CD8 T	880_40_30	unassigned	0.728432	0.113528
CACGAGGGTAAGTTCC-0	Mono/Mac	Kupffer+MonoMac+Endothelial	880_63_45	NTC	2.69708	0.850987
CACGAGGGTGGCCAAG-0	Endothelial	Kupffer+MonoMac+Endothelial	880_56_57	NTC	1.7946	-0.699238
CACGATGCACTAGCAG-0	Mono/Mac	Kupffer+MonoMac+Endothelial	880_40_15	unassigned	1.4391	-0.231217
CACGATTGTAGGTGTA-0	Neutrophil	Neutrophil	880_51_44	NTC	1.38444	-0.765271
CACGCAACACATAGCG-0	Endothelial	Kupffer+MonoMac+Endothelial	880_66_22	unassigned	2.76472	0.0281133
CACGCAACATAGATTG-0	CD8 T	CD8 T	880_48_28	unassigned	1.69316	1.20546
CACGCAACATCACGGA-0	pDC	pDC	880_34_67	NTC	0.271764	-0.252084
CACGCCAAGTAATGCT-0	CD8 T	CD8 T	880_27_59	unassigned	1.64241	1.14801
CACGCTAGTGATAGTG-0	B cell	B cell	880_49_50	NTC	2.43301	1.84286
CACGCTAGTGGCGACA-0	Neutrophil	Neutrophil	880_53_20	Ifng	1.2617	-0.848798
CACGCTAGTTTACTAG-0	NK	NK	880_53_59	NTC	0.329803	-0.811193
CACGGCTGTATGTAGG-0	Kupffer	Kupffer+MonoMac+Endothelial	880_25_62	unassigned	3.73182	0.125526
CACGGTTAGGATGGCA-0	Endothelial	Kupffer+MonoMac+Endothelial	880_14_62	NTC	1.9054	-0.616163
CACGGTTAGGGGCAAC-0	NK	NK	880_21_44	unassigned	0.989385	0.0976151
CACGTAATCAGCGAGA-0	B cell	B cell	880_62_52	unassigned	0.418727	-0.333861
CACGTAATCCATCGAA-0	Kupffer	Kupffer+MonoMac+Endothelial	880_50_17	NTC	1.93972	-0.983463
CACGTAATCTGGGCTG-0	CD8 T	CD8 T	880_49_76	unassigned	1.56894	1.06485
CACGTATGTTTCGGTG-0	CD8 T	CD8 T	880_34_18	unassigned	0.496587	-0.148883
CACTAACGTTATGGCT-0	Mono/Mac	Kupffer+MonoMac+Endothelial	880_13_54	NTC	1.97929	0.233498
CACTACCCAAGCGAGG-0	pDC	pDC	880_28_18	unassigned	-0.544631	-1.26558
CACTACCCATAAGTGC-0	NK	NK	880_48_55	Ifng	1.72616	1.11279
CACTATGAGATAGGGT-0	DC	DC	880_55_54	NTC	0.610947	-0.868682
CACTCAAAGCTTACTC-0	Endothelial	Kupffer+MonoMac+Endothelial	880_42_23	unassigned	2.65423	-0.0547251
CACTCAAAGGAGGTCA-0	Endothelial	Kupffer+MonoMac+Endothelial	880_36_28	unassigned	2.06637	-0.495474
CACTCACCATTAGTGA-0	Kupffer	Kupffer+MonoMac+Endothelial	880_59_24	unassigned	1.6797	-1.14437
CACTCCATCCGGTTGG-0	CD8 T	CD8 T	880_63_21	unassigned	-0.523572	-1.30354
CACTCCATCTAATGCG-0	Mono/Mac	Kupffer+MonoMac+Endothelial	880_21_22	unassigned	2.09028	0.328976
CACTCCGCATGACACG-0	DC	DC	880_53_59	NTC	1.2464	-0.27607
CACTCGCTCACGTTGA-0	Mono/Mac	Kupffer+MonoMac+Endothelial	880_67_40	NTC	1.82365	0.0996003
CACTGCCTCCCTCGGT-0	Neutrophil	Neutrophil	880_1_53	unassigned	2.28814	-0.15027
CACTGGGTCATCGAGC-0	Mono/Mac	Kupffer+MonoMac+Endothelial	880_19_20	unassigned	1.45593	-0.216736
CACTGTCCAAAGGTAG-0	Kupffer	Kupffer+MonoMac+Endothelial	880_59_10	unassigned	4.35964	0.514035
CAGCAAAGTCTAGTAC-0	Mono/Mac	Kupffer+MonoMac+Endothelial	880_42_36	unassigned	-0.101138	-1.55623
CAGCAAAGTCTGGTAT-0	DC	DC	880_52_16	NTC	1.17553	-0.342167
CAGCAAAGTTAGGCAA-0	CD4 T	CD4 T	880_42_74	NTC	0.0672669	-0.655386
CAGCAAAGTTCAAGCT-0	DC	DC	880_6_49	Ifng	0.523189	-0.950523
CAGCAAAGTTTCAGGT-0	Mono/Mac	Kupffer+MonoMac+Endothelial	880_47_29	unassigned	1.76123	0.0459049
CAGCAATCATGATCGG-0	B cell	B cell	880_19_23	NTC	0.125258	-0.650996
CAGCACTAGATTCAAC-0	Mono/Mac	Kupffer+MonoMac+Endothelial	880_72_24	NTC	2.00833	0.25848
CAGCACTAGCTACAGC-0	CD4 T	CD4 T	880_26_35	unassigned	-0.162529	-0.915161
CAGCAGCCAAATCCGG-0	CD8 T	CD8 T	880_0_52	unassigned	0.618425	-0.0109819
CAGCCATAGTGAAGGT-0	CD8 T	CD8 T	880_23_46	unassigned	-0.399555	-1.16318
CAGCCTAGTGGCCTAC-0	Mono/Mac	Kupffer+MonoMac+Endothelial	880_53_59	NTC	0.269886	-1.23705
CAGCGAGGTAAGCGCG-0	Endothelial	Kupffer+MonoMac+Endothelial	880_48_18	unassigned	3.32558	0.448621
CAGCGAGGTGAACGCG-0	Mono/Mac	Kupffer+MonoMac+Endothelial	880_17_49	NTC	3.59218	1.62102
CAGCGATTCAGTTAGT-0	Endothelial	Kupffer+MonoMac+Endothelial	880_16_70	unassigned	1.42788	-0.974184
CAGCGGTCAGCACGGT-0	Endothelial	Kupffer+MonoMac+Endothelial	880_13_49	unassigned	0.233031	-1.87003
CAGCGGTCAGTAATGC-0	Kupffer	Kupffer+MonoMac+Endothelial	880_32_79	unassigned	5.24592	1.06248
CAGCGGTCATCCCTAA-0	Mono/Mac	Kupffer+MonoMac+Endothelial	880_74_56	unassigned	0.694583	-0.8717
CAGCTATGTCTCACGA-0	Endothelial	Kupffer+MonoMac+Endothelial	880_23_79	unassigned	2.79478	0.0506512
CAGCTATGTGAGATTG-0	Endothelial	Kupffer+MonoMac+Endothelial	880_9_45	unassigned	1.29531	-1.07358
CAGCTCTCAAGCGTGC-0	Treg	Treg	880_58_54	unassigned	-0.0711384	-0.947013
CAGCTTGGTAAGTTGG-0	B cell	B cell	880_57_55	unassigned	-0.640446	-1.47845
CAGCTTGGTATAGCGA-0	CD8 T	CD8 T	880_51_66	unassigned	1.41543	0.891107
CAGCTTGGTCTCACGA-0	Mono/Mac	Kupffer+MonoMac+Endothelial	880_6_18	unassigned	1.60735	-0.0864757
CAGCTTGGTTGAGTCT-0	Endothelial	Kupffer+MonoMac+Endothelial	880_66_34	NTC	2.72096	-0.00469762
CAGGACAAGCGATACC-0	Endothelial	Kupffer+MonoMac+Endothelial	880_40_12	unassigned	3.54235	0.611149
CAGGACAAGGTGATCC-0	Kupffer	Kupffer+MonoMac+Endothelial	880_64_18	NTC	2.97884	-0.340436
CAGGAGGCACAAGCCA-0	Mono/Mac	Kupffer+MonoMac+Endothelial	880_69_79	unassigned	1.60547	-0.0880945
CAGGAGGCACTACCTA-0	Endothelial	Kupffer+MonoMac+Endothelial	880_22_69	unassigned	1.40312	-0.992746
CAGGAGGCATCACGGA-0	Neutrophil	Neutrophil	880_31_52	NTC	-0.502559	-2.04944
CAGGATAGTAGGCGTG-0	Mono/Mac	Kupffer+MonoMac+Endothelial	880_16_52	NTC	1.70741	-0.000398376
CAGGATTCAACTGTGG-0	CD8 T	CD8 T	880_43_27	unassigned	1.07029	0.500457
CAGGATTCACATTCCA-0	CD8 T	CD8 T	880_44_27	NTC	-0.724003	-1.5304
CAGGCACCAACGGGTC-0	DC	DC	880_37_53	NTC	0.654185	-0.828359
CAGGCGAGTTAGTACC-0	Endothelial	Kupffer+MonoMac+Endothelial	880_71_37	unassigned	2.16608	-0.420716
CAGGGATGTATGTAGG-0	Mono/Mac	Kupffer+MonoMac+Endothelial	880_57_22	unassigned	3.06104	1.16409
CAGGGATGTTGCTTCC-0	Endothelial	Kupffer+MonoMac+Endothelial	880_53_18	unassigned	3.45736	0.547426
CAGGGCTCAAAGGAAT-0	pDC	pDC	880_44_13	NTC	0.226035	-0.308854
CAGGGCTCATGACTAA-0	Mono/Mac	Kupffer+MonoMac+Endothelial	880_75_44	NTC	2.10948	0.345494
CAGGGGACAAGTTCGG-0	Kupffer	Kupffer+MonoMac+Endothelial	880_51_45	unassigned	4.99069	0.90454
CAGGGGACACATTGCC-0	CD8 T	CD8 T	880_55_32	unassigned	-0.497096	-1.27358
CAGGGTTTCACGGCCA-0	Mono/Mac	Kupffer+MonoMac+Endothelial	880_14_79	NTC	2.20381	0.426645
CAGGGTTTCGTGCCAG-0	DC	DC	880_31_24	NTC	1.62296	0.0750935
CAGGTAAGTGATTCCG-0	Mono/Mac	Kupffer+MonoMac+Endothelial	880_21_44	unassigned	2.97377	1.08902
CAGGTAAGTTGACCAT-0	Endothelial	Kupffer+MonoMac+Endothelial	880_34_21	unassigned	0.663873	-1.547
CAGGTAAGTTGTGGCC-0	Kupffer	Kupffer+MonoMac+Endothelial	880_42_26	NTC	4.734	0.745691
CAGTAACCATGGAACT-0	B cell	B cell	880_0_64	NTC	-0.73586	-1.58156
CAGTAAGGTAGGCTGG-0	B cell	B cell	880_61_32	unassigned	0.228096	-0.539864
CAGTAAGGTTATCTGA-0	CD8 T	CD8 T	880_45_65	unassigned	0.96597	0.382384
CAGTAGCTCACACATG-0	DC	DC	880_53_42	NTC	2.30705	0.71306
CAGTAGCTCACACTAG-0	CD8 T	CD8 T	880_24_44	unassigned	2.19264	1.77079
CAGTAGGAGTCGATCA-0	CD8 T	CD8 T	880_11_51	NTC	1.65251	1.15944
CAGTAGTCACTAATGA-0	Kupffer	Kupffer+MonoMac+Endothelial	880_79_45	unassigned	2.10249	-0.882738
CAGTAGTCATCGTTCA-0	Mono/Mac	Kupffer+MonoMac+Endothelial	880_37_59	NTC	3.26183	1.33683
CAGTATTAGCTATCTC-0	Kupffer	Kupffer+MonoMac+Endothelial	880_23_44	unassigned	1.56015	-1.21835
CAGTATTAGGTTCATG-0	Treg	Treg	880_61_51	unassigned	0.905521	0.00905771
CAGTCAATCCCCATGC-0	Neutrophil	Neutrophil	880_68_42	unassigned	4.05193	1.05005
CAGTCCTCAAATCGTA-0	Mono/Mac	Kupffer+MonoMac+Endothelial	880_55_67	unassigned	4.21617	2.15782
CAGTCCTCAGGCATTG-0	Mono/Mac	Kupffer+MonoMac+Endothelial	880_60_46	unassigned	-1.10512	-2.41993
CAGTCCTCATAGGGCC-0	DC	DC	880_69_22	unassigned	0.714723	-0.771903
CAGTCTAAGATTGAGA-0	Kupffer	Kupffer+MonoMac+Endothelial	880_46_44	unassigned	0.393158	-1.94051
CAGTGTTGTAGGTCCC-0	Treg	Treg	880_37_73	Ifng	1.71721	0.80364
CAGTGTTGTATAGCCT-0	Mono/Mac	Kupffer+MonoMac+Endothelial	880_9_59	unassigned	4.76657	2.63131
CAGTTACGTCAAGCGG-0	Mono/Mac	Kupffer+MonoMac+Endothelial	880_57_58	unassigned	3.19571	1.27995
CAGTTAGTCACTCGCC-0	CD8 T	CD8 T	880_70_24	NTC	1.08766	0.520121
CAGTTAGTCTAGCTGA-0	CD8 T	CD8 T	880_52_64	NTC	0.919339	0.329606
CAGTTATAGGTAAGGT-0	Endothelial	Kupffer+MonoMac+Endothelial	880_25_76	unassigned	3.0765	0.26187
CAGTTCAAGGGTTAGG-0	Endothelial	Kupffer+MonoMac+Endothelial	880_55_63	Ifng	4.84872	1.5906
CAGTTCCCAAGCGCAC-0	Endothelial	Kupffer+MonoMac+Endothelial	880_16_79	NTC	2.52666	-0.150374
CAGTTTGAGTCGAATT-0	Mono/Mac	Kupffer+MonoMac+Endothelial	880_49_41	NTC	1.52124	-0.160548
CATAACTAGGAATGAC-0	CD8 T	CD8 T	880_68_33	NTC	0.372851	-0.288933
CATAACTAGGTATCTG-0	Kupffer	Kupffer+MonoMac+Endothelial	880_57_46	NTC	2.09912	-0.884825
CATAAGCCAATTACAG-0	Mono/Mac	Kupffer+MonoMac+Endothelial	880_69_40	NTC	1.2843	-0.364381
CATAAGCCACTAGCCT-0	Endothelial	Kupffer+MonoMac+Endothelial	880_16_49	NTC	3.02937	0.226536
CATAAGGGTAGCTAGA-0	CD8 T	CD8 T	880_45_27	NTC	0.103959	-0.593277
CATACATAGGTGCTAC-0	Mono/Mac	Kupffer+MonoMac+Endothelial	880_57_19	NTC	1.0098	-0.600529
CATACCAAGAACGATA-0	Mono/Mac	Kupffer+MonoMac+Endothelial	880_71_8	NTC	0.477418	-1.05852
CATACCAAGCCCGTGA-0	Treg	Treg	880_33_23	unassigned	0.260799	-0.622073
CATACCCCAACGGTCA-0	T other	T other	880_43_72	Ifng	0.93718
CATACCCCAAGCACCA-0	Endothelial	Kupffer+MonoMac+Endothelial	880_43_23	unassigned	3.03488	0.230668
CATACTTCACAGGGCT-0	Kupffer	Kupffer+MonoMac+Endothelial	880_31_63	NTC	1.6863	-1.14028
CATACTTCATCATAGA-0	Endothelial	Kupffer+MonoMac+Endothelial	880_15_65	unassigned	4.32545	1.19828
CATAGAGGTTCAAGCT-0	Kupffer	Kupffer+MonoMac+Endothelial	880_41_50	NTC	0.495238	-1.87734
CATAGAGGTTTACCTT-0	Neutrophil	Neutrophil	880_19_63	unassigned	0.658543	-1.25927
CATAGATTCACTCGAA-0	Kupffer	Kupffer+MonoMac+Endothelial	880_17_60	unassigned	2.40216	-0.697296
CATAGCATCACCTTCG-0	Kupffer	Kupffer+MonoMac+Endothelial	880_37_46	unassigned	5.69708	1.34167
CATAGCATCTAGTGTG-0	Neutrophil	Neutrophil	880_25_18	unassigned	4.658	1.4625
CATAGCCAGATTAGCT-0	CD8 T	CD8 T	880_4_68	NTC	0.962491	0.378448
CATAGCCAGGAGTCGA-0	Endothelial	Kupffer+MonoMac+Endothelial	880_27_76	NTC	0.871138	-1.3916
CATAGCCAGGGCAGAC-0	NKT	NKT	880_0_56	unassigned	1.17229	1.27355
CATAGCGCATAGATCA-0	B cell	B cell	880_49_77	Ifng	1.02023	0.31615
CATAGGCTCATATCCC-0	CD8 T	CD8 T	880_40_28	NTC	1.69565	1.20827
CATAGGCTCCCTGGCT-0	Kupffer	Kupffer+MonoMac+Endothelial	880_65_33	NTC	5.59344	1.27753
CATAGGCTCGAGTGTC-0	Mono/Mac	Kupffer+MonoMac+Endothelial	880_39_61	NTC	2.50344	0.684401
CATAGGGAGCATGTGC-0	CD8 T	CD8 T	880_72_14	unassigned	-0.206387	-0.94454
CATAGGTCAATCCGCT-0	CD8 T	CD8 T	880_29_16	unassigned	1.88122	1.4183
CATAGTTAGCTAGTCA-0	Mono/Mac	Kupffer+MonoMac+Endothelial	880_66_22	unassigned	2.15842	0.387592
CATAGTTAGGGTAGCA-0	Mono/Mac	Kupffer+MonoMac+Endothelial	880_43_40	NTC	2.44187	0.631441
CATATAGCATAGACAC-0	Neutrophil	Neutrophil	880_38_22	NTC	4.03891	1.04119
CATATAGCATTCCTGA-0	Mono/Mac	Kupffer+MonoMac+Endothelial	880_40_13	unassigned	0.900012	-0.694976
CATATCCTCACACCAA-0	Endothelial	Kupffer+MonoMac+Endothelial	880_35_19	NTC	1.84285	-0.663063
CATATCCTCCTCACGC-0	CD8 T	CD8 T	880_76_66	unassigned	0.163576	-0.5258
CATATGGTCAATCAGT-0	Mono/Mac	Kupffer+MonoMac+Endothelial	880_52_16	NTC	1.48569	-0.191138
CATATTCCACTAGGCA-0	Kupffer	Kupffer+MonoMac+Endothelial	880_79_5	unassigned	6.2355	1.67485
CATATTCCAGCTAGGC-0	NK	NK	880_35_59	NTC	0.49756	-0.580048
CATATTGGTTGGATGA-0	Kupffer	Kupffer+MonoMac+Endothelial	880_25_24	NTC	2.27073	-0.778626
CATCAATAGGGTATGG-0	Kupffer	Kupffer+MonoMac+Endothelial	880_48_37	NTC	4.16602	0.394217
CATCACAAGCGCAACT-0	Mono/Mac	Kupffer+MonoMac+Endothelial	880_0_67	unassigned	1.92673	0.188279
CATCACTTCTGTAACG-0	Mono/Mac	Kupffer+MonoMac+Endothelial	880_33_19	unassigned	2.88461	1.01232
CATCAGGCACCTACCG-0	Endothelial	Kupffer+MonoMac+Endothelial	880_59_24	unassigned	2.51266	-0.16087
CATCATTCACATGACG-0	Kupffer	Kupffer+MonoMac+Endothelial	880_54_48	NTC	2.53537	-0.61486
CATCATTCATGAGCCA-0	Kupffer	Kupffer+MonoMac+Endothelial	880_31_19	unassigned	1.54444	-1.22807
CATCCACCAACTAGAC-0	pDC	pDC	880_19_56	unassigned	0.347211	-0.158423
CATCCACCAACTTAGA-0	Mono/Mac	Kupffer+MonoMac+Endothelial	880_32_27	unassigned	0.721228	-0.848778
CATCCACCAAGCTTAA-0	Endothelial	Kupffer+MonoMac+Endothelial	880_30_21	NTC	0.919811	-1.35511
CATCCAGGTCATCAGT-0	Kupffer	Kupffer+MonoMac+Endothelial	880_29_61	unassigned	3.70797	0.110763
CATCCCATCAAGTCCA-0	Endothelial	Kupffer+MonoMac+Endothelial	880_16_62	unassigned	0.365039	-1.77105
CATCCCATCAGGAACG-0	CD8 T	CD8 T	880_35_58	NTC	2.95788	2.63691
CATCCCATCTGTAAGT-0	CD8 T	CD8 T	880_61_30	unassigned	0.477576	-0.170401
CATCCCGCAATATGTG-0	Treg	Treg	880_55_54	NTC	2.71348	1.77891
CATCCCGCAGCTCATC-0	Mono/Mac	Kupffer+MonoMac+Endothelial	880_40_40	unassigned	1.03153	-0.581835
CATCCCGCATCCATGC-0	DC	DC	880_45_52	unassigned	0.705931	-0.780102
CATCCCGCATGACCAG-0	Mono/Mac	Kupffer+MonoMac+Endothelial	880_20_23	NTC	1.86782	0.137599
CATCCCTGTTAAGGTG-0	Kupffer	Kupffer+MonoMac+Endothelial	880_63_45	NTC	2.41032	-0.692244
CATCCGCTCAATTCCC-0	DC	DC	880_71_17	NTC	2.81288	1.18479
CATCCGGAGCTTACTC-0	Mono/Mac	Kupffer+MonoMac+Endothelial	880_44_25	unassigned	2.18364	0.409293
CATCCGGAGTACCATG-0	CD8 T	CD8 T	880_48_51	NTC	0.437696	-0.215539
CATCGCCTCCTCATCG-0	Endothelial	Kupffer+MonoMac+Endothelial	880_55_60	NTC	4.06484	1.00289
CATCGCCTCTAGTCCT-0	CD8 T	CD8 T	880_33_21	unassigned	0.319964	-0.348793
CATCGCCTCTAGTCTC-0	pDC	pDC	880_33_60	unassigned	0.310738	-0.203702
CATCGTCCAATTACAG-0	Endothelial	Kupffer+MonoMac+Endothelial	880_47_30	NTC	2.80194	0.0560209
CATCGTCCAGGAAGTA-0	Mono/Mac	Kupffer+MonoMac+Endothelial	880_70_42	Ifng	0.776597	-0.801146
CATCGTCCATCGCTGT-0	Kupffer	Kupffer+MonoMac+Endothelial	880_33_22	unassigned	3.42624	-0.0635755
CATCGTTTCCTCACCA-0	Kupffer	Kupffer+MonoMac+Endothelial	880_50_17	NTC	2.98967	-0.333735
CATCGTTTCCTGCGGA-0	Kupffer	Kupffer+MonoMac+Endothelial	880_54_28	unassigned	0.699646	-1.75085
CATCTAAGTTTCACTT-0	Kupffer	Kupffer+MonoMac+Endothelial	880_6_71	unassigned	5.27264	1.07901
CATCTGTTCCCTCTGA-0	NKT	NKT	880_16_51	NTC	0.549685	0.184208
CATCTGTTCTATCTGC-0	DC	DC	880_75_25	unassigned	1.83133	0.269417
CATGAACCAACCGCAA-0	DC	DC	880_68_51	Ifng	0.16187	-1.28748
CATGAAGGTATGGATG-0	Endothelial	Kupffer+MonoMac+Endothelial	880_3_78	NTC	2.31406	-0.309767
CATGAAGGTTGTGCCA-0	Endothelial	Kupffer+MonoMac+Endothelial	880_62_37	unassigned	1.56212	-0.873536
CATGATTAGGCTTGGT-0	Mono/Mac	Kupffer+MonoMac+Endothelial	880_23_73	unassigned	0.922154	-0.675928
CATGCCAGTAGCCAGG-0	Mono/Mac	Kupffer+MonoMac+Endothelial	880_2_71	NTC	0.0314051	-1.44221
CATGCCAGTCAAGTGA-0	Mono/Mac	Kupffer+MonoMac+Endothelial	880_18_24	NTC	1.18606	-0.448893
CATGCCAGTCTAGTCG-0	Kupffer	Kupffer+MonoMac+Endothelial	880_61_52	unassigned	3.95008	0.260591
CATGCCTCATAGGTGT-0	CD8 T	CD8 T	880_60_47	unassigned	0.399505	-0.258766
CATGCCTCATTACACT-0	Mono/Mac	Kupffer+MonoMac+Endothelial	880_41_19	unassigned	1.11298	-0.511768
CATGCGCGTCAACCGC-0	Mono/Mac	Kupffer+MonoMac+Endothelial	880_9_53	unassigned	2.26589	0.480047
CATGCGCGTGCAGGCA-0	pDC	pDC	880_49_49	NTC	-0.121825	-0.740696
CATGCGCGTTCAATCA-0	B cell	B cell	880_41_55	NTC	0.968849	0.260624
CATGCTGGTAACCACT-0	Mono/Mac	Kupffer+MonoMac+Endothelial	880_79_28	NTC	2.32575	0.531542
CATGGGTTCATGTCTC-0	NK	NK	880_30_33	unassigned	1.26105	0.47193
CATGGGTTCCAGATAT-0	Endothelial	Kupffer+MonoMac+Endothelial	880_12_48	unassigned	2.34093	-0.289624
CATGGTCAGCATAGCC-0	CD8 T	CD8 T	880_42_42	NTC	0.502285	-0.142434
CATGGTTGTTAATCCA-0	Endothelial	Kupffer+MonoMac+Endothelial	880_51_12	unassigned	2.20972	-0.387997
CATGGTTGTTCGTTCC-0	Mono/Mac	Kupffer+MonoMac+Endothelial	880_32_16	unassigned	2.12221	0.356444
CATGGTTGTTTGGCGC-0	Kupffer	Kupffer+MonoMac+Endothelial	880_75_17	unassigned	5.41113	1.16472
CATGTTAGTTTCCTAT-0	Neutrophil	Neutrophil	880_40_16	unassigned	3.14297	0.431471
CATGTTGAGCCTGGTG-0	Kupffer	Kupffer+MonoMac+Endothelial	880_46_49	NTC	3.81859	0.179218
CATTAACAGCTATGCA-0	Endothelial	Kupffer+MonoMac+Endothelial	880_44_12	NTC	4.1366	1.05669
CATTACCTCCACCTGC-0	Mono/Mac	Kupffer+MonoMac+Endothelial	880_60_54	Ifng	6.9959	4.54913
CATTAGGTCTGGATCA-0	DC	DC	880_13_79	NTC	0.655465	-0.827165
CATTAGTAGCAACTGC-0	Endothelial	Kupffer+MonoMac+Endothelial	880_79_38	unassigned	4.83656	1.58148
CATTAGTAGTAATGCT-0	CD8 T	CD8 T	880_46_17	Ifng	1.13745	0.576477
CATTCATCAACCAGAT-0	DC	DC	880_25_47	NTC	2.51851	0.910262
CATTCATCACAATCCC-0	DC	DC	880_49_16	NTC	0.895658	-0.603167
CATTCGAAGGCATGGA-0	CD4 T	CD4 T	880_20_72	NTC	0.400557	-0.278615
CATTCGAAGGTGGATG-0	Endothelial	Kupffer+MonoMac+Endothelial	880_60_16	NTC	5.62226	2.17057
CATTCGCCAATCAGGT-0	Treg	Treg	880_65_50	unassigned	1.07561	0.175557
CATTCGCCATAACGGT-0	Endothelial	Kupffer+MonoMac+Endothelial	880_36_76	unassigned	4.45471	1.29519
CATTCGTTCCAACCTT-0	Endothelial	Kupffer+MonoMac+Endothelial	880_22_68	NTC	3.88287	0.866449
CATTCGTTCCCAATGA-0	Mono/Mac	Kupffer+MonoMac+Endothelial	880_7_58	unassigned	1.50771	-0.172192
CATTCGTTCCTGCCTA-0	Endothelial	Kupffer+MonoMac+Endothelial	880_42_63	NTC	-0.818225	-2.65821
CATTCTATCCGTCAGG-0	DC	DC	880_70_24	NTC	0.608597	-0.870874
CATTGGATCAATCAAC-0	Endothelial	Kupffer+MonoMac+Endothelial	880_54_25	NTC	2.96328	0.176987
CATTGGATCGTACCGG-0	Mono/Mac	Kupffer+MonoMac+Endothelial	880_49_20	NTC	2.09853	0.336072
CATTGGGCAAGCCTCT-0	Mono/Mac	Kupffer+MonoMac+Endothelial	880_52_16	NTC	2.37477	0.573717
CATTGGGCAAGGGTCC-0	CD8 T	CD8 T	880_77_30	unassigned	0.539646	-0.100148
CATTGGGCACTCGCAT-0	DC	DC	880_7_34	unassigned	1.36935	-0.161413
CATTGTGAGAAGCTCC-0	Kupffer	Kupffer+MonoMac+Endothelial	880_50_60	NTC	2.61668	-0.564549
CATTGTGAGGCTACAC-0	Endothelial	Kupffer+MonoMac+Endothelial	880_52_24	Ifng	3.90119	0.880183
CATTGTGAGGCTCCGA-0	Endothelial	Kupffer+MonoMac+Endothelial	880_7_76	unassigned	1.73524	-0.743739
CATTTAGGTGCACCAC-0	Neutrophil	Neutrophil	880_65_42	NTC	2.81586	0.208862
CATTTCATCAGGCATC-0	Mono/Mac	Kupffer+MonoMac+Endothelial	880_29_50	NTC	3.53402	1.57098
CATTTCATCGATATAC-0	Endothelial	Kupffer+MonoMac+Endothelial	880_13_73	NTC	2.54778	-0.134535
CATTTGAGTGACGAAC-0	CD8 T	CD8 T	880_48_54	unassigned	0.341695	-0.324198
CATTTGAGTTAACTGC-0	NKT	NKT	880_71_8	NTC	0.100918	-0.60097
CATTTGGAGCTGGTCG-0	DC	DC	880_49_47	unassigned	0.294938	-1.16338
CATTTGGAGGCAACTC-0	DC	DC	880_56_41	unassigned	2.11637	0.535239
CATTTGGAGGTCATAT-0	Hepatocyte	Hepatocyte	880_15_73	Ifng	3.50541	1.1069
CCAAAGCTCCGTAGCG-0	Mono/Mac	Kupffer+MonoMac+Endothelial	880_7_72	NTC	2.40685	0.601314
CCAAATGTCCCGCGTT-0	Endothelial	Kupffer+MonoMac+Endothelial	880_25_24	NTC	1.37533	-1.01358
CCAAATGTCCGTAGAC-0	Endothelial	Kupffer+MonoMac+Endothelial	880_69_44	unassigned	3.17034	0.332227
CCAAATGTCCGTGAAC-0	Treg	Treg	880_56_37	NTC	1.30028	0.395496
CCAAATGTCCTTCGTG-0	CD8 T	CD8 T	880_17_21	NTC	1.54311	1.03562
CCAAATGTCGTTCGTT-0	Mono/Mac	Kupffer+MonoMac+Endothelial	880_23_52	unassigned	1.52234	-0.159606
CCAAATTAGGAGGTCA-0	Mono/Mac	Kupffer+MonoMac+Endothelial	880_65_47	unassigned	0.86344	-0.726437
CCAACCCTCCCGCAAG-0	B cell	B cell	880_66_48	NTC	-1.16298	-2.04311
CCAACTAAGGTCACGT-0	Mono/Mac	Kupffer+MonoMac+Endothelial	880_67_22	unassigned	2.86699	0.997152
CCAACTGGTTCCCGAA-0	Endothelial	Kupffer+MonoMac+Endothelial	880_23_18	NTC	2.69909	-0.0210898
CCAATAGTCAGGGCTT-0	CD8 T	CD8 T	880_44_25	unassigned	0.325302	-0.342751
CCAATAGTCATGCTGA-0	DC	DC	880_26_20	NTC	1.43775	-0.0976218
CCAATAGTCCGGTACG-0	Mono/Mac	Kupffer+MonoMac+Endothelial	880_33_52	NTC	1.49547	-0.182722
CCAATATAGTAGTGCC-0	Endothelial	Kupffer+MonoMac+Endothelial	880_17_51	NTC	2.26951	-0.343173
CCAATCAAGGTACGCT-0	Mono/Mac	Kupffer+MonoMac+Endothelial	880_57_13	NTC	1.95751	0.214762
CCAATCAAGGTTCGAC-0	Mono/Mac	Kupffer+MonoMac+Endothelial	880_36_53	NTC	2.56409	0.736582
CCAATTAGTGATGCTT-0	Treg	Treg	880_70_39	unassigned	-0.229693	-1.10222
CCAATTTCAGCTACGA-0	Mono/Mac	Kupffer+MonoMac+Endothelial	880_54_40	NTC	1.413	-0.253664
CCACAACAGCCAACCG-0	Kupffer	Kupffer+MonoMac+Endothelial	880_23_29	unassigned	0.0196246	-2.17166
CCACAACAGGATAGAC-0	Kupffer	Kupffer+MonoMac+Endothelial	880_6_73	unassigned	2.22663	-0.805917
CCACAACAGGATGACG-0	DC	DC	880_51_72	unassigned	3.33365	1.67045
CCACAACAGGGTGACA-0	Mono/Mac	Kupffer+MonoMac+Endothelial	880_67_22	unassigned	2.45641	0.643945
CCACAACAGGTATAGA-0	CD8 T	CD8 T	880_27_16	NTC	-1.25468	-2.13104
CCACAGACATAATCCT-0	Treg	Treg	880_54_8	unassigned	0.973016	0.0751302
CCACATCCAAGGTACT-0	HPC	HPC	880_49_53	unassigned	0.0282391
CCACATCCATTCGCAC-0	CD4 T	CD4 T	880_44_72	Ifng	1.10131	0.513564
CCACCGTTCCTGGTAA-0	NKT	NKT	880_54_27	unassigned	-0.00786491	-0.7913
CCACCTCAGCCTACCC-0	Kupffer	Kupffer+MonoMac+Endothelial	880_50_62	NTC	1.41066	-1.31085
CCACCTGCATAGAGAG-0	Mono/Mac	Kupffer+MonoMac+Endothelial	880_69_2	unassigned	2.0204	0.268863
CCACCTTGTGACTTCG-0	Mono/Mac	Kupffer+MonoMac+Endothelial	880_16_72	Ifng	5.49081	3.25434
CCACGAACAATCGTCC-0	Endothelial	Kupffer+MonoMac+Endothelial	880_31_77	NTC	1.61086	-0.836998
CCACGATAGCATATCG-0	Kupffer	Kupffer+MonoMac+Endothelial	880_30_56	NTC	3.49348	-0.0219645
CCACGATAGCTGGTCG-0	CD8 T	CD8 T	880_67_20	NTC	0.31459	-0.354876
CCACGATAGGAGGTAT-0	Neutrophil	Neutrophil	880_12_73	NTC	-0.114804	-1.78556
CCACGATAGTCATCAG-0	NK	NK	880_13_50	unassigned	0.728452	-0.261913
CCACGCAAGATTCACG-0	NK	NK	880_13_51	unassigned	0.380626	-0.741167
CCACGCAAGGCGCTCA-0	Mono/Mac	Kupffer+MonoMac+Endothelial	880_56_25	unassigned	1.66943	-0.0330648
CCACGGATCGTGCGTG-0	Endothelial	Kupffer+MonoMac+Endothelial	880_23_18	NTC	0.19544	-1.89821
CCACGTAGTAGCAGAC-0	Treg	Treg	880_45_14	NTC	0.0184953	-0.859269
CCACGTTCAAGTAGCT-0	Treg	Treg	880_37_46	unassigned	1.71286	0.799373
CCACTAAAGAAGCAAC-0	Erythrocytes	Erythrocytes	880_57_23	unassigned	-0.740079	-0.32408
CCACTAAAGGTCAACC-0	Kupffer	Kupffer+MonoMac+Endothelial	880_32_49	unassigned	4.12902	0.371319
CCACTAGGTAACCCTG-0	Mono/Mac	Kupffer+MonoMac+Endothelial	880_59_36	unassigned	1.14206	-0.486749
CCACTATTCAGCATAT-0	Kupffer	Kupffer+MonoMac+Endothelial	880_44_59	unassigned	2.74095	-0.487644
CCACTCGCATCCGCAT-0	CD8 T	CD8 T	880_22_36	unassigned	0.968382	0.385115
CCAGAATCAAACCTAA-0	Endothelial	Kupffer+MonoMac+Endothelial	880_73_26	NTC	2.7561	0.0216502
CCAGAATCAGCTCATC-0	Kupffer	Kupffer+MonoMac+Endothelial	880_38_51	NTC	1.6847	-1.14128
CCAGACTAGCTGGTAC-0	pDC	pDC	880_69_42	unassigned	1.49873	1.27111
CCAGACTAGCTTAGGC-0	Mono/Mac	Kupffer+MonoMac+Endothelial	880_60_56	Ifng	4.1268	2.08093
CCAGAGAAGTATGATC-0	Kupffer	Kupffer+MonoMac+Endothelial	880_37_62	NTC	2.87991	-0.401657
CCAGAGAAGTTAGATC-0	Endothelial	Kupffer+MonoMac+Endothelial	880_43_17	NTC	2.5079	-0.164435
CCAGAGGGTAGCGCCT-0	Kupffer	Kupffer+MonoMac+Endothelial	880_71_8	NTC	4.48945	0.59436
CCAGAGGGTAGGTAGC-0	NKT	NKT	880_7_61	unassigned	0.347045	-0.170338
CCAGAGGGTTTCGATA-0	DC	DC	880_1_50	unassigned	1.52971	-0.0118613
CCAGATTGTTGGCTAT-0	DC	DC	880_16_66	unassigned	1.07961	-0.431616
CCAGCAACAATATCTC-0	Kupffer	Kupffer+MonoMac+Endothelial	880_50_17	NTC	2.56163	-0.59861
CCAGCAACAGTTGCCT-0	Endothelial	Kupffer+MonoMac+Endothelial	880_47_29	unassigned	5.13749	1.80711
CCAGCCAAGGTAACGG-0	Mono/Mac	Kupffer+MonoMac+Endothelial	880_50_39	unassigned	3.9578	1.93555
CCAGCCTTCAATTAGC-0	Mono/Mac	Kupffer+MonoMac+Endothelial	880_60_40	NTC	4.19696	2.14129
CCAGCCTTCACCTTCG-0	DC	DC	880_31_12	NTC	1.89968	0.333164
CCAGCCTTCGTAATCG-0	pDC	pDC	880_79_35	unassigned	0.429274	-0.0565473
CCAGCTAGTTCACGAT-0	Mono/Mac	Kupffer+MonoMac+Endothelial	880_73_41	unassigned	0.986023	-0.620983
CCAGCTAGTTTCGTAA-0	Kupffer	Kupffer+MonoMac+Endothelial	880_69_34	NTC	3.51937	-0.00594135
CCAGGCATCACTTGCT-0	Endothelial	Kupffer+MonoMac+Endothelial	880_50_55	unassigned	0.903091	-1.36765
CCAGGCATCCTGCTCA-0	B cell	B cell	880_34_48	NTC	-0.00895654	-0.796033
CCAGGCATCGTTGCGG-0	DC	DC	880_21_2	unassigned	2.69291	1.0729
CCAGGTTAGGGTTGAG-0	Mono/Mac	Kupffer+MonoMac+Endothelial	880_21_75	unassigned	3.44527	1.49464
CCAGTAATCGATCGGT-0	CD8 T	CD8 T	880_36_12	NTC	-0.413631	-1.17911
CCAGTCCTCTGTCATC-0	Mono/Mac	Kupffer+MonoMac+Endothelial	880_67_16	unassigned	2.49521	0.677323
CCAGTTGGTTATCCTT-0	Mono/Mac	Kupffer+MonoMac+Endothelial	880_34_21	unassigned	1.40179	-0.26331
CCAGTTGGTTGTAAGG-0	DC	DC	880_34_76	NTC	2.05243	0.475607
CCATAACGTATGGATG-0	CD8 T	CD8 T	880_33_58	unassigned	0.968539	0.385292
CCATAAGTCCATTAGG-0	Mono/Mac	Kupffer+MonoMac+Endothelial	880_66_37	unassigned	0.39544	-1.12904
CCATAATAGTACCAGC-0	B cell	B cell	880_15_46	unassigned	1.25661	0.571588
CCATACTTCGAGTCTA-0	Mono/Mac	Kupffer+MonoMac+Endothelial	880_71_8	NTC	0.0235017	-1.44901
CCATATAGTATGGTGA-0	CD8 T	CD8 T	880_15_18	NTC	1.22703	0.677861
CCATCACCAATATACG-0	Kupffer	Kupffer+MonoMac+Endothelial	880_72_32	NTC	2.82506	-0.435595
CCATCAGGTTCTGTGG-0	Endothelial	Kupffer+MonoMac+Endothelial	880_58_53	unassigned	-0.200254	-2.19488
CCATCATTCGCATTGA-0	DC	DC	880_3_52	unassigned	-0.762734	-2.14974
CCATCCGCACTCAAGG-0	DC	DC	880_8_63	unassigned	1.72301	0.1684
CCATCCTGTCTTGAGT-0	CD8 T	CD8 T	880_44_12	NTC	-0.205723	-0.943788
CCATCCTGTTGGCTAT-0	Endothelial	Kupffer+MonoMac+Endothelial	880_58_39	NTC	0.499018	-1.6706
CCATCGCTCAGTTGCA-0	Neutrophil	Neutrophil	880_21_57	unassigned	1.52043	-0.672726
CCATCTTAGGGTATCC-0	CD8 T	CD8 T	880_60_55	Ifng	-0.0110144	-0.723409
CCATGGGTCACCACTT-0	CD8 T	CD8 T	880_57_47	NTC	4.49667	4.37859
CCATGTCCAAAGGCAA-0	Mono/Mac	Kupffer+MonoMac+Endothelial	880_75_35	NTC	1.32787	-0.326902
CCATGTCCAATCCCGT-0	Mono/Mac	Kupffer+MonoMac+Endothelial	880_13_39	unassigned	1.7122	0.00372332
CCATGTCCATTCGTGC-0	DC	DC	880_35_23	NTC	0.738569	-0.749665
CCATTAGAGCCAGCCA-0	CD8 T	CD8 T	880_49_68	unassigned	0.928471	0.339942
CCATTAGAGCCAGTAC-0	Mono/Mac	Kupffer+MonoMac+Endothelial	880_24_35	unassigned	3.39582	1.45209
CCATTAGAGGATTAAG-0	DC	DC	880_17_79	NTC	0.868313	-0.628668
CCATTTCAGAAGGTTA-0	B cell	B cell	880_29_19	unassigned	1.05897	0.358008
CCATTTCAGTAGTAGA-0	Neutrophil	Neutrophil	880_44_23	unassigned	1.33909	-0.796134
CCATTTGCAAGCCTCT-0	CD8 T	CD8 T	880_17_21	NTC	0.525639	-0.116001
CCATTTGCATCACGCT-0	Kupffer	Kupffer+MonoMac+Endothelial	880_28_77	NTC	1.07221	-1.5203
CCCAATCCATTACTCG-0	Mono/Mac	Kupffer+MonoMac+Endothelial	880_58_32	unassigned	1.06898	-0.549619
CCCACTATCGCTTCGC-0	Mono/Mac	Kupffer+MonoMac+Endothelial	880_61_44	NTC	1.76188	0.0464675
CCCACTTGTTGGATTC-0	DC	DC	880_37_48	NTC	0.952529	-0.550131
CCCAGCAAGATTCCAG-0	CD4 T	CD4 T	880_0_73	unassigned	-0.704845	-1.52823
CCCAGCAAGCGATGAG-0	DC	DC	880_53_64	NTC	0.394218	-1.0708
CCCAGCAAGGGGCAAC-0	Endothelial	Kupffer+MonoMac+Endothelial	880_64_7	unassigned	2.81545	0.0661473
CCCAGCAAGTGCCGTG-0	pDC	pDC	880_50_40	NTC	1.92139	1.7958
CCCAGCAAGTTAGCCA-0	DC	DC	880_36_77	unassigned	0.964336	-0.539119
CCCAGCAAGTTAGCTG-0	Mono/Mac	Kupffer+MonoMac+Endothelial	880_35_21	NTC	0.986206	-0.620825
CCCAGTGAGAATCGAA-0	Mono/Mac	Kupffer+MonoMac+Endothelial	880_39_61	NTC	2.17815	0.404564
CCCATAGGTAGCGACG-0	Mono/Mac	Kupffer+MonoMac+Endothelial	880_51_45	unassigned	0.841844	-0.745015
CCCATATTCACATACG-0	CD8 T	CD8 T	880_63_40	unassigned	0.813423	0.209725
CCCATATTCACTCATC-0	Mono/Mac	Kupffer+MonoMac+Endothelial	880_35_78	NTC	1.87156	0.140818
CCCATATTCATCGAAT-0	CD8 T	CD8 T	880_79_13	NTC	1.64099	1.14641
CCCATATTCCGTGGAT-0	CD8 T	CD8 T	880_21_56	unassigned	-0.657155	-1.45474
CCCATCATCGAACGAG-0	CD8 T	CD8 T	880_54_55	NTC	0.542835	-0.0965376
CCCATCATCTATCTCA-0	Mono/Mac	Kupffer+MonoMac+Endothelial	880_3_76	NTC	-0.353028	-1.77293
CCCATCGCACTAGCTC-0	Endothelial	Kupffer+MonoMac+Endothelial	880_73_26	NTC	1.17954	-1.16038
CCCATCTGTTCAAGTC-0	DC	DC	880_76_67	unassigned	3.88664	2.18615
CCCATGAGTATTGCGT-0	Mono/Mac	Kupffer+MonoMac+Endothelial	880_7_79	NTC	1.57791	-0.111797
CCCATGAGTTAGCGTT-0	Endothelial	Kupffer+MonoMac+Endothelial	880_47_31	NTC	3.69497	0.72557
CCCATTGTCCCGCGAA-0	Hepatocyte	Hepatocyte	880_23_20	unassigned	1.78211	-0.500662
CCCATTGTCTATCAGG-0	CD8 T	CD8 T	880_74_30	unassigned	0.883311	0.288828
CCCATTTAGTAGGCAG-0	Mono/Mac	Kupffer+MonoMac+Endothelial	880_27_17	NTC	2.78851	0.929642
CCCGAACGTTAAGGAT-0	B cell	B cell	880_35_49	NTC	0.378487	-0.377346
CCCGACAAGAATCCGC-0	Kupffer	Kupffer+MonoMac+Endothelial	880_18_54	unassigned	2.65041	-0.543675
CCCGACAAGTGAACCC-0	Endothelial	Kupffer+MonoMac+Endothelial	880_47_31	NTC	3.07774	0.262803
CCCGATGAGTAATCGT-0	Mono/Mac	Kupffer+MonoMac+Endothelial	880_57_13	NTC	1.85194	0.123936
CCCGATTCACCATCCG-0	DC	DC	880_69_30	unassigned	1.25623	-0.266908
CCCGCTTAGAAGCCAG-0	CD4 T	CD4 T	880_30_18	unassigned	0.0308522	-0.696552
CCCGCTTAGATTCAGT-0	Mono/Mac	Kupffer+MonoMac+Endothelial	880_39_73	unassigned	1.49306	-0.184797
CCCGCTTAGCAGGCAA-0	Endothelial	Kupffer+MonoMac+Endothelial	880_50_57	unassigned	0.588396	-1.60359
CCCGGTTTCCATGCTT-0	Mono/Mac	Kupffer+MonoMac+Endothelial	880_66_22	unassigned	0.689132	-0.876389
CCCGGTTTCTCATCGT-0	DC	DC	880_70_9	NTC	2.74168	1.11839
CCCGGTTTCTGGTAGC-0	Mono/Mac	Kupffer+MonoMac+Endothelial	880_47_62	NTC	0.352573	-1.16592
CCCGTAAGTTTACCTT-0	DC	DC	880_60_20	unassigned	2.98885	1.34889
CCCGTTATCCCGCACT-0	Endothelial	Kupffer+MonoMac+Endothelial	880_11_58	unassigned	3.93018	0.90192
CCCGTTGCAAAGGAAT-0	CD8 T	CD8 T	880_50_66	unassigned	2.68136	2.32394
CCCTAACCAATCGAGT-0	NKT	NKT	880_68_1	unassigned	0.448825	0.00773889
CCCTAACCATAGGTTA-0	CD8 T	CD8 T	880_4_72	unassigned	1.12699	0.564631
CCCTACGCACCTCATA-0	DC	DC	880_17_21	NTC	1.68299	0.13108
CCCTACGCAGGGACCT-0	DC	DC	880_26_50	unassigned	0.591662	-0.886666
CCCTACGCATTGCCAC-0	Kupffer	Kupffer+MonoMac+Endothelial	880_22_44	unassigned	4.68204	0.713542
CCCTAGTCAGTTAATG-0	Endothelial	Kupffer+MonoMac+Endothelial	880_68_9	unassigned	2.31227	-0.311113
CCCTATGTCACTCGGG-0	Kupffer	Kupffer+MonoMac+Endothelial	880_31_19	unassigned	3.05697	-0.292087
CCCTATGTCTGTGCTT-0	Kupffer	Kupffer+MonoMac+Endothelial	880_23_24	NTC	3.94924	0.260068
CCCTCAGCAAATCGCG-0	CD8 T	CD8 T	880_36_73	Ifng	-0.751179	-1.56116
CCCTGAGAGCGAATGG-0	Mono/Mac	Kupffer+MonoMac+Endothelial	880_34_30	NTC	3.06635	1.16866
CCCTGGTTCACATTGG-0	Kupffer	Kupffer+MonoMac+Endothelial	880_48_56	NTC	6.86412	2.06385
CCCTGGTTCAGGGACA-0	Mono/Mac	Kupffer+MonoMac+Endothelial	880_7_70	NTC	3.22556	1.30562
CCCTGGTTCTGTGAAT-0	Mono/Mac	Kupffer+MonoMac+Endothelial	880_19_21	NTC	2.02234	0.270529
CCCTGTTGTAGCCAGG-0	Mono/Mac	Kupffer+MonoMac+Endothelial	880_53_57	NTC	1.56285	-0.124755
CCCTGTTGTCAGCGGA-0	Kupffer	Kupffer+MonoMac+Endothelial	880_57_28	unassigned	4.87597	0.833551
[truncated: 7,447 more rows]

## Sheet: zscore_per_cell_cytokines
cell_barcode	BAFF	CD27L	CD30L	Decorin	FLT3L	GITRL	HGF	IFNγ	IFNε	IFNκ	IFNλ2	IL11	IL15	IL17B	IL17C	IL17E	IL17F	IL19	IL1Ra	IL1β	IL2	IL20	IL21	IL22	IL24	IL30	IL31	IL34	IL5	IL6	ILY	LIGHT	Leptin	MCSF	Noggin	OX40L	PBS	PSPN (Persephin)	SCF	TNFα	TPO	TRAIL	TWEAK	VEGF
AAACCAAAGGGTAGTG-0	-0.567285	-0.350122	-0.310727	-0.02217	0.155299	-0.0456418	-1.0811	-0.204804	-1.47652	1.23035	-1.05921	1.1478	1.14692	1.00199	0.978702	0.410081	-0.14913	-0.384182	-0.44966	0.28332	-0.236779	-0.897683	-1.5125	0.75638	1.87392	0.45028	-0.230655	-0.831408	0.937471	0.0567174	0.277391	0.514927	0.354116	-0.361115	0.654627	-0.937241	-0.667927	0.197965	-0.0691973	-0.965683	-0.129351	-0.0817204	1.10782	-1.74403
AAACCAAAGTTGCTTC-0	-0.624378	-1.46095	-0.13014	1.02103	-0.593827	0.371236	0.995091	-0.381712	0.952841	0.0902976	-0.365062	2.52699	-0.529483	-0.193313	0.303924	-0.306256	0.499276	-0.0978454	-0.0324185	1.34579	0.146276	-1.58178	-0.438183	-2.35077	-0.771507	0.0426283	0.0483509	-1.40089	-0.436954	1.08064	0.682253	0.150698	0.622022	1.72418	1.43568	-0.229523	-0.761446	-1.24683	0.56238	-0.000333787	-0.155385	-0.621904	1.15194	1.57473
AAACCATTCCTCAGCC-0	-0.926749	0.146871	-1.50029	-1.6381	-1.273	1.20093	-1.1277	1.33842	0.61671	-1.20161	-0.407454	0.284186	2.19111	-0.42482	-0.942708	-1.79158	-1.10748	-0.733102	-0.649738	2.23543	-1.84081	2.21598	1.14767	0.54379	-1.72802	1.25218	-1.33844	1.21365	-0.806602	-0.888217	3.35512	1.49291	1.55322	0.763819	0.643229	0.347431	0.026296	0.385398	1.78823	-2.83035	-1.61749	0.0812808	-0.665537	-0.966474
AAACCATTCGTGAACC-0	0.915418	0.987086	0.078289	-0.521622	0.964747	0.397638	-0.366456	0.19639	-1.06058	-0.0147962	0.51756	-0.762838	-0.052924	0.31476	-0.304959	1.25626	-0.719519	1.22725	-0.20718	-0.00341019	0.0370058	-0.0195892	-0.52267	1.03721	-1.39312	-1.87351	-0.137007	-1.10021	0.280881	1.6402	0.574849	1.09795	0.391527	-0.115576	-1.26329	0.288032	0.46192	-0.976459	-0.0372899	-0.349215	0.91519	-0.353258	0.180904	-0.883793
AAACCCGCATGACTCC-0	0.325701	0.687936	0.889185	-1.07779	0.129238	0.574189	-1.32691	0.41194	0.135419	-1.67616	0.650161	-0.816479	-1.39426	-0.119923	0.114382	-0.376994	-0.366954	0.415294	0.1416	0.103705	0.661823	-1.42441	2.34332	1.20166	1.46621	1.55267	-1.88926	0.0953696	-1.28215	-0.315647	-0.462778	-1.25214	2.24035	-0.0162732	0.641498	-0.842602	-1.10049	0.448237	-0.401086	-1.30329	-2.18907	0.721105	0.0236984	0.116081
AAACCCTGTGACTCGC-0	-2.08975	0.0347588	0.406489	-0.308752	-0.221586	-0.188861	0.350662	0.909154	-0.0153555	0.130617	-0.3935	0.758738	-0.652838	1.33092	-0.0901409	-0.681631	-0.719864	-0.804218	0.128336	-0.187227	-0.107304	-0.746439	0.0601155	1.09895	-0.370999	0.0332653	-0.619706	-0.236474	0.0388329	0.374032	-0.716315	0.0640268	0.900425	-0.768464	0.257539	-0.416702	-0.0765796	-0.965453	-0.450461	0.0921856	0.197458	-0.477969	0.433726	1.16714
AAACCCTGTTTACTAG-0	-0.545981	0.69625	-0.574741	-0.422064	1.55962	0.162362	-0.432021	0.174966	-0.601536	-0.215476	0.752722	0.539212	0.188754	-0.197122	-1.31964	0.61907	0.267262	-0.762607	-2.11818	-0.64148	-0.0970607	-0.644558	-0.0746569	0.128021	1.13781	-0.115405	-0.572764	-0.30978	1.19565	-0.785904	1.22519	0.968018	0.163983	-0.697584	0.82001	-1.54523	-0.823963	-0.188799	0.167329	0.236114	0.257863	0.465001	0.477744	-0.106942
AAACCCTGTTTGGCAT-0	-0.121899	-0.430661	0.411103	1.61947	-0.41759	-0.766194	-0.0585719	0.228563	1.2145	0.152639	-1.84598	-0.0324894	-2.28685	-0.330566	1.14583	-1.24851	1.06929	1.18177	-0.235053	2.29908	2.25319	-0.197626	0.105935	0.340462	-1.11323	-1.59122	-0.82696	-0.73543	0.251621	0.563912	0.499604	0.185137	0.00570055	-0.211554	0.804347	-0.968165	-0.248642	0.740191	0.390566	0.243132	-0.837165	-1.23277	0.99737	-0.20111
AAACCGCTCACCCTGC-0	-1.00082	-0.074411	2.16914	0.901284	-0.0802749	-0.0134698	-0.13155	-1.52676	0.865705	0.110865	1.76164	-0.382677	-0.150634	0.0313971	-1.21787	0.43034	1.05437	-0.140427	0.444034	-0.174105	-0.519237	0.791023	-0.385906	-0.46236	0.646664	-0.383632	-0.0316465	0.210893	0.104581	-0.308693	0.284176	1.74474	0.0881211	0.114951	-0.713259	-0.55462	-0.41004	-1.25425	0.0743101	-0.0913314	0.04032	1.02902	0.23616	0.0180495
AAACCGCTCCCTGTGC-0	-1.1129	1.19074	-0.475295	1.13323	0.598446	0.147802	-0.508093	0.513033	-0.665688	-0.149247	0.734744	1.29455	-0.28107	-2.11234	0.563592	0.680214	-0.123248	-0.714504	0.447961	1.06644	0.463501	0.168962	0.891207	0.426318	0.456113	-0.475304	-1.35875	0.455438	-0.470845	-0.674871	-0.0997341	-1.31027	0.0532574	-0.172004	0.676857	0.283902	0.322978	-0.0750468	-0.148273	-1.78516	-1.70599	0.540433	0.401372	-1.69508
AAACGACAGCCAGAGA-0	1.14992	0.302573	1.53049	-0.547043	0.0251524	-0.710335	-0.323131	-0.457493	0.804909	-1.06768	0.390814	-1.40408	0.983916	0.163135	1.49954	1.05413	-0.317001	-1.1217	-1.02666	-1.86992	-2.22967	1.32151	-1.36446	-1.19063	-0.0989893	-0.11072	1.08112	0.238888	1.51209	-0.838207	0.213236	-0.418609	-1.40985	-1.54037	0.200997	-0.669125	0.60785	0.643138	-0.541145	1.10597	1.33673	-1.24631	-1.29316	2.06025
AAACGATGTAACGGGT-0	0.705508	0.206655	-0.775443	0.424328	-0.142969	-0.791894	0.420815	0.33544	-0.0570893	0.0528207	0.832808	-0.258541	0.350897	-0.014676	1.26355	-0.445301	-0.009268	-0.286737	-0.833545	-0.939937	0.425957	-0.539307	0.448893	1.37471	-0.79517	0.662538	0.048214	-0.241288	0.0207054	0.781704	-0.340331	-0.608643	0.0544677	1.26469	-0.617314	-1.36068	0.373056	-1.26348	0.182201	0.245017	0.851513	0.313005	0.592437	-0.171855
AAACGATGTTTGATTG-0	1.27112	0.457362	-1.4699	-0.562059	-0.48101	0.70054	1.01545	-0.909526	0.662462	0.241158	-0.336312	-0.278007	-0.0846931	-1.06789	-1.86492	0.172671	0.131035	-1.35896	0.934703	-1.44005	-0.666011	1.38781	-0.713117	-0.950885	-1.31668	0.710338	-0.107697	0.247097	-1.07345	1.52294	1.1463	1.22916	-0.198014	-1.16609	-0.317892	0.874459	-1.04053	0.591777	-0.00823693	0.490153	-0.42553	0.132663	-0.901397	0.117489
AAACGCCTCCCGCATC-0	0.341115	0.307701	0.112526	0.0867177	-1.15802	-1.08177	0.536162	0.797181	-0.378833	0.375485	-0.226266	-0.016836	-0.0115284	-0.108315	1.73945	-0.15966	-0.239906	-0.101792	-0.673382	0.538796	0.488642	-0.72367	0.746671	0.842789	-0.391311	-1.39357	0.097045	1.49253	0.280397	-0.227068	-0.83067	0.339787	-0.577854	-0.947159	0.621548	1.27213	1.43182	-1.11976	0.436872	0.0692083	-0.145613	0.215189	-0.00902964	0.182382
AAACGTCCAACCCTAC-0	-0.226386	1.49692	0.465201	-0.561648	-0.0884935	0.469069	0.189772	-1.36285	0.353206	-0.912557	0.879036	0.174902	0.0747671	-0.215227	-0.736939	1.03995	-1.22166	0.667305	-0.215178	0.141045	-0.345249	-0.114535	0.64692	-0.15463	0.330854	-0.35478	0.793472	1.19931	-0.0424319	-0.537869	-0.390876	0.205836	-0.767537	-1.04276	-1.73346	0.515213	0.173617	-0.349989	0.630027	1.19686	1.07373	1.62855	-2.32728	1.56816
AAACGTCCATCGGTAG-0	-1.36461	0.736107	0.981435	-0.0687933	-1.20438	0.34442	0.519183	0.580912	0.730194	-0.439384	-0.422435	0.78432	-0.683188	0.643347	-0.819375	0.155461	1.76619	0.00216531	0.317879	0.631874	-1.26773	0.182108	-0.037655	1.74505	-0.412846	0.0191012	0.951288	0.0173265	0.394023	0.119238	-1.50716	0.467862	0.990298	0.569685	-0.967831	-0.962413	-0.401936	-0.498006	-0.902182	-1.33775	0.074152	-0.365366	-0.572371	-0.194987
AAACGTCCATGAGCCA-0	-1.00651	0.637044	0.192726	0.244736	-0.334998	0.384368	0.743419	-0.972258	0.902606	-0.12746	1.36346	-1.16255	0.321956	-1.48962	-1.88852	0.727949	0.679771	0.480084	0.993206	-0.13385	-0.638351	1.03198	-0.977475	0.388079	-0.945022	0.0375291	1.29377	0.591966	-0.737992	-0.870761	-0.0935551	0.0182098	0.0253348	-0.909332	-0.537166	-0.187113	-0.124045	-0.540968	-1.502	-0.313811	0.37229	-0.206969	-0.105894	0.831401
AAACTCACACATAGGT-0	-0.824538	-0.815649	0.412562	0.946066	0.273976	-0.412337	-0.0383013	-0.0563538	-0.212843	1.44481	0.600256	0.435512	0.512071	0.600635	0.0436726	-0.0369712	0.843804	0.254384	0.336577	0.388653	0.617878	0.520964	-0.55491	0.0285232	0.694553	0.32171	-0.375501	-1.1904	0.184848	-0.508972	0.324407	0.140564	0.625217	0.191001	0.962901	-1.00828	0.239316	-0.0853558	-0.8968	-0.168387	-1.14765	-0.391637	1.2265	-0.580453
AAACTCACAGGTTCAG-0	1.23308	-0.857224	1.58174	0.562067	-0.215804	-1.48899	-0.456366	-1.59883	-0.156447	0.460789	1.12843	-0.588899	-1.20661	-1.15717	-0.25863	-2.51312	2.10754	2.05782	0.907575	0.050585	2.64083	-1.47555	-1.50543	-1.429	-1.29245	1.98077	1.48161	-0.00530273	1.05632	0.825713	0.664675	-0.702297	1.47711	3.45747	1.35412	-0.193144	0.328944	-0.663992	-1.17206	0.128299	-0.657073	-0.298783	-0.0127899	-1.62715
AAACTCCGTATGGGAC-0	-0.23887	-0.792724	-0.170412	1.29131	-0.623473	1.15257	1.84109	-1.29225	-0.0368804	0.231395	-0.378564	2.27029	-0.237918	-0.833056	1.21802	0.309762	0.358799	0.817967	0.0610375	0.452366	1.17694	-1.06676	-0.497079	-1.6742	0.294794	0.299808	-0.788958	-2.05359	-0.926612	0.960279	0.079426	0.204308	0.859591	0.53374	0.62846	-0.424946	-1.36347	-0.421463	-0.117307	0.386045	-0.384296	-0.796607	1.78951	-0.130249
AAACTCCGTGGCCTAC-0	0.267598	0.0367496	0.376336	-0.538746	1.03631	-0.000206059	-0.502608	-0.56074	0.696082	-0.367134	-0.00556544	-0.616037	-0.858205	0.11454	0.384495	0.327229	0.102453	-0.789235	-1.72489	-0.288867	-0.454596	-0.137834	-0.540962	-0.344463	0.747578	0.0497059	-0.845155	0.517111	0.923637	-0.937058	-0.124793	1.3603	0.340901	-0.656732	-0.313442	-1.1368	-0.967513	0.857434	0.122347	0.240854	-0.0264643	-1.23057	1.03009	1.8723
AAACTTGCATCCATGC-0	-0.29164	1.34571	-0.180469	2.30399	-0.257489	-0.816739	0.820399	1.13001	0.617627	0.552035	-0.0492112	1.0561	2.2294	-0.0782982	0.406445	0.147735	-0.240815	0.362536	-0.554332	0.303474	-0.754172	-1.58109	-0.929006	1.95834	-0.347909	-0.458826	0.773211	-0.924918	-0.0119407	-0.598369	-0.888096	-0.610586	-1.18436	-0.645308	-0.72979	-0.760389	-1.66121	-1.1546	-0.211599	0.0531966	0.00954243	0.0377403	1.09268	0.43187
AAAGCATGTGATGAAT-0	-1.891	1.31291	-0.103273	-0.506823	1.62445	-0.895687	1.72054	-1.08243	1.69869	-0.503895	0.557103	-1.60683	0.240087	-1.02979	-1.05148	1.16412	-0.444083	-1.31967	-0.361369	0.745811	0.560856	1.82217	1.87048	0.343241	0.586098	0.631653	0.3964	0.0236324	0.897214	-0.413642	-0.384684	-0.700102	-1.30667	-0.2496	-0.191495	0.0815511	0.427396	0.111803	-0.387621	-0.820853	-0.0566409	0.110981	0.489042	0.582084
AAAGCATGTTAGCCAT-0	-0.00665665	-0.636539	-0.680215	0.241574	0.371908	-0.43979	1.2772	-0.219659	-0.144466	0.00433513	-0.928913	-0.0781507	-0.169423	-0.336604	-0.400234	-0.332283	0.0634252	0.642735	-0.406039	0.440684	0.508829	0.21153	0.717275	-0.554517	-0.745925	-0.619634	0.900403	-0.826597	0.467119	-0.0963484	1.13622	-0.0918952	-0.128634	0.925202	1.13204	0.554824	0.737295	0.597078	-1.38338	-0.157293	-0.190666	1.01026	-0.42192	0.108541
AAAGCCAGTAATCGGA-0	-0.933599	0.0340726	-0.403339	-0.446221	-0.124857	-0.267147	-0.344235	-0.0380939	0.649948	-0.550544	0.691541	-1.13693	-0.101375	0.44881	0.33714	1.36824	0.403482	0.0557988	-0.0184321	0.951136	0.0685664	-0.267776	1.07908	-1.81811	0.126351	-1.28736	0.393599	-0.255604	0.228222	0.51836	-0.103492	-0.327608	0.461503	-0.795549	-0.560212	0.66425	0.000896585	1.31259	-0.157577	0.149023	0.670301	-0.101087	-0.795173	1.46139
AAAGCCAGTAGGCTGG-0	0.356862	-1.06706	-2.26257	0.19849	-0.855707	0.285916	0.376461	-0.561723	0.717854	-0.738445	-1.00473	0.512639	0.568174	-0.523578	-0.282817	3.07538	0.252687	0.462792	-2.36457	-0.544893	-1.87319	-0.3721	0.055745	0.0962087	0.939186	-1.33654	1.61447	-1.9127	-0.33179	0.130306	-0.347212	0.856063	-2.74965	0.534185	-0.606136	1.3778	0.89378	1.10844	-0.0801882	-0.0688857	2.23987	-0.165304	0.233894	1.30294
AAAGCTAAGGGTGACA-0	1.12522	1.14946	0.18809	-1.16027	0.132767	-0.360697	0.032411	0.977079	-0.477305	-1.29878	0.377724	0.0192028	0.129277	0.700135	0.27796	0.390084	-0.495859	1.11563	-1.20003	-1.62485	-0.798688	-0.450233	1.69668	1.89071	-1.73626	0.0226636	0.177964	0.204798	0.0394044	-0.85101	-1.15145	-0.790365	-0.747572	-1.24127	-0.59226	1.51464	0.246882	-0.391507	-0.599781	1.61636	1.08033	0.971973	0.422554	-0.136067
AAAGGTCAGGTACAGG-0	0.354273	-1.1016	-2.01218	-0.258386	0.783107	-0.28085	-0.856113	-0.667096	-0.361632	-0.790296	0.281172	0.05112	-0.0178863	-0.0133643	1.79273	1.19543	0.654692	1.11363	-1.40976	1.04054	0.385398	0.30354	0.260071	-0.0725796	0.553878	-0.96675	-0.625592	-0.0554626	1.32586	1.33622	-0.292064	-0.157208	-1.33991	0.16509	0.419194	-0.601603	-1.01942	0.112632	1.31328	-0.464306	0.767603	-0.0184036	-0.984207	-0.194416
AAAGGTCAGTCATCCT-0	0.0231014	-0.545734	0.542225	-0.331245	-0.665901	0.550937	-0.0139715	-0.445333	0.391216	0.530804	0.148192	-0.422793	0.751493	0.181856	-0.0140233	0.487644	2.58638	0.542715	1.31622	-1.76754	0.307058	-1.12967	-2.15267	-0.808657	-0.38499	-0.148288	-1.1482	-0.357426	0.15106	0.104637	-0.482893	1.19472	1.76637	-0.431927	0.587849	-0.317352	-0.325825	-0.357052	-1.03339	0.453044	0.847449	-1.65972	0.181626	-0.375433
AAAGGTTGTGAGTCGG-0	0.660168	-0.627487	-2.16962	-1.03381	0.00797635	0.270292	-1.27692	-0.416911	0.346678	-1.55827	0.757353	1.5753	-1.50327	-0.280945	-0.819485	1.48319	0.16258	0.458524	0.597985	0.12726	-1.8632	1.83704	0.778219	1.26421	0.973331	-2.0178	-0.237856	0.435662	0.578466	-0.512915	-1.42772	1.26727	-1.30237	-0.697047	-1.85071	-0.158014	-0.175721	3.45464	1.10989	-0.0290125	0.0656062	-1.23406	0.262738	-0.330037
AAAGTAGTCTCATCGT-0	-0.439299	-0.547504	0.383352	-1.9144	1.18851	0.284429	0.549629	-0.3114	-2.33643	0.77832	0.0225384	-0.525475	-1.28595	1.71895	1.29694	-0.92172	-0.472579	-0.0993625	0.440832	-0.158394	0.165263	-1.68645	0.753683	-1.14816	0.243023	0.796573	-1.34973	-0.870839	2.38006	1.59577	0.246294	-0.146093	1.69151	0.405071	1.16919	1.13749	-0.0275547	1.74453	-1.39429	-0.853586	-0.798932	-0.0792426	-1.15355	-1.21798
AAAGTGATCGACTCAA-0	0.971724	0.220071	0.380956	0.545444	0.547162	-0.413319	0.477761	0.169176	-1.07657	2.11533	0.39917	-1.01423	0.0628751	-0.608269	-0.332904	-0.00156916	1.05414	0.16324	0.123144	-1.05115	0.461085	-0.248506	-0.613976	-0.109958	-1.15665	-0.31987	1.29215	-0.549388	0.339269	-0.276015	-0.0282275	-1.06859	-0.463664	0.330128	-0.143696	-0.151058	0.846102	-0.349453	-0.529927	-0.524005	0.64165	0.870306	0.777049	-1.57098
AAAGTTGAGCATCACA-0	0.659004	-0.472799	-1.2027	0.675989	-0.0636812	0.733359	-1.65417	-2.17238	-0.875123	0.89951	3.07239	-1.25999	-1.1019	-1.22611	-1.04001	0.944334	0.906323	1.47585	1.00804	-1.05014	0.530537	1.52278	0.0980607	-0.299773	0.461021	-1.0497	0.0459004	-1.25379	-2.4101	1.43183	-0.282899	2.12713	-1.31574	0.550679	-2.081	0.283067	-2.56643	0.807769	3.25091	0.89985	2.63027	0.573448	0.790487	-2.19092
AAAGTTGAGGCACTGT-0	-2.48424	-0.297884	-0.261227	1.25237	1.05081	-0.126938	0.415739	0.852617	-1.76674	0.253431	0.112193	0.424319	-1.3098	0.539987	-1.09979	-0.957313	-0.0144467	0.714179	0.0783785	-0.596393	-0.83736	1.97342	-0.614938	0.85393	1.14997	-2.09757	-0.593581	-0.40768	0.159498	0.70117	-0.111452	-1.39856	0.938465	3.05959	1.19655	-0.201811	1.79394	-1.13959	-1.83554	0.309714	2.09656	-0.229586	-0.340933	0.542907
AAATGAGTCATGGCAC-0	-0.648089	0.659343	-0.923176	-0.442126	1.52438	1.52236	-2.13242	-1.03332	0.220289	-1.00481	1.44163	-1.15205	-0.440286	-0.81659	0.166107	-0.0514172	-0.477128	0.0943984	-0.678668	-1.22782	-1.96771	0.207726	-0.968903	-1.52369	0.640135	1.05148	0.760468	-0.00400143	0.56961	1.70292	0.993364	-0.190271	1.29082	-0.0235279	0.703004	-0.691567	-2.54983	0.501608	0.149678	-0.320305	0.364681	-1.06778	-0.262125	0.459568
AAATGCAAGGCATGTC-0	-0.915751	-0.156438	-1.78834	-1.58861	1.48012	-0.35151	-1.52129	0.0316059	0.208772	-0.866608	0.557833	-1.51001	-1.37151	0.0297073	-0.149983	0.166614	-0.281015	-0.260629	0.343026	-0.794993	0.211845	0.883203	-0.122799	1.55737	1.3931	1.59165	-1.25157	0.542304	0.488223	0.981044	0.468863	-1.54121	2.06295	-0.063188	0.356937	-1.72786	-0.717527	0.574747	-1.31273	0.669358	-0.869046	-0.278006	0.290478	1.88997
AAATGCTTCGCTCAGG-0	-1.71983	-0.0660855	-1.8218	0.818108	-1.0346	-1.69268	1.29885	0.270945	1.32775	-0.159053	-1.3248	-0.886633	0.987612	-2.87675	0.132831	-1.62968	0.0258983	0.596279	0.0489902	-1.76495	2.50347	1.32361	1.93899	0.260654	-2.40826	0.794748	0.723228	1.7384	0.250802	-0.0136555	-0.543467	-2.18819	1.73193	1.26123	1.12857	3.07932	2.92681	-0.927936	-2.08463	0.352477	-1.54862	-0.273228	0.875856	-0.868262
AAATGGATCCGGGTCA-0	-1.86142	2.3415	-0.0891016	-0.193952	-1.66004	1.11208	0.0653308	-1.84217	-0.633613	-1.13839	0.667044	0.348084	-1.70938	-2.03775	-1.7648	0.608625	-0.963001	0.333589	1.80875	-0.204818	2.25395	1.36122	0.0354286	-0.39981	1.87563	0.980585	-0.841892	-0.224846	-0.380541	-0.0868239	-0.463973	-0.749853	0.145969	-0.177226	-1.04339	-1.3943	-1.69788	-0.33981	2.25481	-0.105411	1.039	2.9015	-1.62709	0.975924
AAATGGGCAGCCTAGA-0	-0.339294	1.2923	-0.862455	0.973093	1.41625	-1.57215	-0.508936	0.00860387	0.377238	-0.470075	0.411242	0.736956	-1.0375	-0.176396	0.469651	-0.761765	1.14612	0.639226	-1.87932	0.707822	-0.100726	0.587788	-0.132365	-1.43781	-1.21354	-1.04437	0.0331924	0.507587	0.404607	3.23797	0.468459	-0.0449419	0.134754	-0.60056	0.40046	-0.496759	-1.25486	-0.764024	0.00832986	0.650259	-0.642515	0.259659	1.8935	-1.16123
AAATGTGAGCCATCGG-0	0.0483191	0.0544794	-1.41509	0.778547	0.0875879	1.18958	0.1893	0.630965	0.246992	0.404093	-1.09442	1.35451	0.73553	0.835955	0.949764	-0.0463286	-0.25915	-0.105529	0.120195	0.513599	-0.0856013	-2.01499	-0.522082	-0.40807	-0.153214	-0.649984	-1.59542	-0.0116435	-0.770295	-0.214977	0.00556134	-0.743553	0.241267	0.120132	0.721404	1.38227	-0.197102	0.533585	-0.358785	-1.86892	-1.28199	-1.08102	1.08955	-0.205417
AAATTCGCAAGTCGCA-0	-2.21155	-0.366883	-0.246027	0.937001	-0.0739504	0.44064	1.45589	-0.87506	0.513724	1.31025	-0.331542	-0.373439	0.607108	-0.642752	0.265257	1.98769	1.70047	0.712823	0.444137	1.33253	-1.19464	-0.410653	-0.976277	-0.613832	0.577086	-1.46156	0.212652	-1.38642	-1.84859	0.601217	1.71137	-0.355681	-0.26335	0.0382275	-0.778412	-1.28183	-0.0908974	0.0122884	-0.314603	-0.467791	1.06983	-0.408374	-0.171572	0.0463032
AAATTCGCAATGGAAG-0	0.133034	-0.528245	-0.810199	0.176119	0.166376	-0.267448	-0.191819	1.0994	-0.0839174	1.26039	-0.293944	0.945657	-0.698232	0.524116	-0.0302043	-0.492112	0.853529	-0.429018	0.665071	0.658324	0.869717	-1.14219	-0.760725	0.809526	0.130706	0.415512	-0.33853	-1.28755	-0.00373496	-0.575929	-0.200257	-0.373627	0.664497	0.924615	0.7458	-0.504269	0.133332	-0.0423992	-0.511398	-0.959499	-1.10042	-0.391346	1.16881	0.114806
AAATTGCTCATGACTG-0	-0.945267	-0.0689034	-0.415596	0.903588	-0.118841	1.50711	0.929157	-0.994506	-0.35386	-1.0362	-0.765021	2.83694	-1.0585	-1.53134	0.479356	0.536899	-0.681289	0.887629	-0.626627	-0.351736	-0.248193	-0.124177	0.768478	-0.772069	-1.38612	-0.507997	1.31952	1.26971	-0.203205	-0.0450336	-0.77651	0.311154	0.0676424	-0.0138483	-1.02281	-0.235906	-1.91054	-0.607405	0.393951	1.10645	1.76097	-0.146243	0.272408	0.00789379
AACACCGCAGGACTAT-0	-0.131704	0.60563	-0.161582	-0.183879	-2.1343	0.26357	0.690392	-0.446737	0.0917864	1.06904	0.0881702	0.840306	-0.0553827	-1.06672	1.10147	1.26385	0.928721	0.183943	0.122409	1.29108	0.239273	-1.25228	-2.41322	0.395975	0.102654	0.16623	1.3689	-1.22161	-0.28364	0.723115	-1.23779	0.410349	-0.501277	0.11927	-0.169177	-0.742393	-0.0388249	-1.47006	0.357173	0.264257	-0.448505	1.03134	-0.0351252	0.887722
AACACCTGTGAGCGCA-0	0.33869	-0.543847	-1.15748	-0.678345	0.461939	-0.120363	0.76995	0.83183	-0.290396	1.01889	-0.269734	0.352674	0.158317	-0.0860781	0.874317	-1.25395	1.03832	-0.49668	0.616627	-0.32177	0.718824	0.183682	0.339803	0.0123293	-1.68265	1.11098	-0.612454	0.872272	0.425651	0.517187	-0.58098	0.0672936	0.969093	0.802421	0.311149	-0.628785	1.25896	-0.0647623	-1.25735	0.275551	0.0712276	-0.0979663	0.00497625	-1.90919
AACACGAGTTGAGCGG-0	-0.0158152	0.201206	0.767167	0.836786	1.41642	-0.106815	1.95467	-0.394431	-0.677164	1.76207	-0.95006	0.978779	-0.138844	0.956376	-0.49521	-1.15837	0.990619	0.577239	0.626058	-0.802726	0.541185	-0.479471	2.30688	0.768609	0.568449	1.26273	0.934486	-0.0807442	-0.572524	-1.23174	-0.540009	-1.26733	-1.13011	0.218254	-0.758257	-1.10406	0.0588711	0.55652	-0.618746	0.269434	-0.580816	-1.27972	0.334955	-0.997037
AACACTTAGCTATGCA-0	0.971473	-0.169126	0.673369	-1.15755	0.401144	-0.4418	0.199654	-1.9045	1.04738	-1.85154	-0.0197389	-0.1327	0.733849	0.783087	0.393777	-0.586495	0.457893	-0.123903	-0.499619	-1.12375	-1.36384	1.47086	0.283114	-1.36683	-0.772436	0.925973	-0.755148	-0.227491	-0.0795012	1.14187	0.0304789	0.0163109	-0.160026	-0.428818	-0.288338	-1.10299	-0.803918	1.08628	-1.04105	2.02612	0.242867	0.243826	0.737771	1.26178
AACACTTAGGCGTCTG-0	0.516033	0.699225	-1.44116	1.24864	0.818427	0.337669	-0.199349	-1.3262	0.658542	-0.0695384	-0.658345	0.159385	2.38833	-0.258019	-1.40141	0.695397	0.93664	-1.3582	-2.45796	-0.395548	-0.706877	0.830929	0.136597	-0.406707	0.0016447	-0.872317	-0.16312	0.526402	0.893074	0.280699	0.921282	2.25566	-1.80684	-0.161672	-0.347872	-1.31812	-2.30707	-0.0272058	2.38728	-0.17901	1.44191	0.0482356	0.0427208	-0.196575
AACAGCTCAAGCGGAG-0	-2.29129	0.155072	-0.706734	0.773863	0.551944	0.958292	-2.24719	-0.244675	-0.588629	1.3318	0.0695519	0.31538	-0.561022	-1.73633	-2.51808	-0.016002	3.26388	-0.269703	1.82854	-0.261134	-0.266897	-0.314232	-0.343641	-0.0125884	1.17934	0.133473	1.47282	2.41529	1.71118	0.81723	-1.26757	-0.966917	-1.17524	-1.22644	0.609347	-0.152926	-0.244494	-0.879505	-0.233134	0.748516	0.118514	0.0669587	1.19374	-2.24731
AACAGCTCATAATTCC-0	-0.427829	0.997363	-0.372695	1.10098	1.09936	-1.34588	0.0603627	-0.0467429	0.206912	1.15087	-0.25856	1.29699	-0.0805596	0.643552	-0.190697	-2.06454	-1.32635	-1.27504	-0.446895	-0.162819	-1.38771	-0.26662	0.876495	0.897	1.34282	0.401997	-2.03959	-0.468147	-1.20321	-0.117066	0.354381	1.54276	-0.0213685	-0.1387	-1.25554	-0.579361	-1.71563	-0.317907	0.0860427	-0.0975355	0.818685	0.716458	1.30566	-0.633771
AACAGCTCATGCTTGC-0	-0.56112	-0.641088	1.28151	-0.0387362	0.817325	-0.133755	-0.796812	0.275488	-0.973378	1.02049	0.723604	0.0219701	-1.06061	0.970596	-0.376237	1.00403	0.383483	-0.195797	-0.224996	-0.898416	-1.0625	0.149691	0.208891	1.71887	-0.550559	-1.56602	-0.213554	0.85219	0.356455	1.69162	-0.359229	2.00677	-1.87145	0.0579632	-1.90231	-0.442334	0.23496	-0.920837	1.51794	1.13127	1.18898	1.21409	-0.343032	-0.77466
AACAGTAAGTGGGTAG-0	0.631155	0.500656	-0.823828	1.29256	-0.114805	-1.2927	0.637814	-0.110676	-0.0757651	0.0341405	0.0240174	-0.842788	-0.200013	-1.41109	0.640719	-0.326686	0.901181	0.260578	-0.217969	-0.582385	1.30205	-0.16614	0.0848673	0.796897	-0.895721	-0.823694	-0.523066	-0.0767936	0.0925136	1.71595	0.256542	-0.522788	0.396902	0.188062	0.0539427	-0.349122	0.809715	-0.724807	-0.242166	-0.0101153	-2.5567	-0.277174	1.2189	-0.064256
AACATAGAGTAAGTAG-0	0.105688	-1.72515	-0.690548	-0.275057	0.67934	0.774008	0.587922	0.46464	-0.458259	0.382491	0.255964	-0.393644	-0.941737	-0.280985	-0.106957	-0.419895	1.67287	0.326648	0.725921	0.527829	0.684522	-1.05644	-0.849133	-0.817759	-0.171261	0.198386	0.264003	0.477493	0.48232	-0.595779	-0.173691	-0.824671	0.734511	-0.125366	1.36139	-0.350637	0.858486	0.657534	-0.116551	-0.676134	-0.805896	-1.27392	0.714672	-0.0749301
AACATCACATTCCTCT-0	1.18513	0.647633	0.693826	-0.248623	-0.750833	-1.90723	2.09981	1.16887	0.747017	-0.768211	-2.02304	1.43358	-0.242645	1.92511	-0.845475	-2.04459	0.392001	2.84106	-2.00468	2.77531	1.40574	-0.139823	1.34697	-1.24526	3.90452	1.29201	0.676674	-0.28273	1.70889	-0.41659	-0.730234	2.79244	-0.455376	0.928824	0.367687	-2.0477	-1.88544	0.535042	0.258803	-1.18272	-1.0593	-1.96145	-1.73111	0.56282
AACATTCAGGCAAGCA-0
AACATTGCACCTGTAC-0	-0.108885	-0.0354131	-0.232744	-0.0522146	0.686746	1.33352	-1.51611	0.533063	1.71353	0.278925	0.951985	0.544782	0.481182	0.360059	-1.40255	-0.0528515	0.601625	-0.400187	-0.156823	0.544602	0.0450299	-0.74062	-0.703835	0.146421	-1.57565	0.334463	-0.246879	-0.372098	-1.42169	-0.786919	0.416479	1.61325	1.05473	-0.756496	0.827445	-1.07492	-1.95536	0.165652	0.294312	-0.154566	-0.25941	-0.577498	1.48865	-1.09763
AACCAACCATCGCTAC-0	-0.755228	1.18666	-0.566877	-1.01377	0.162862	0.763919	-0.628752	0.120884	-1.88734	-0.121138	-0.518146	0.538301	0.644516	0.577146	-0.968748	-0.12348	0.493726	-0.412176	-0.573254	-0.644631	0.234969	0.838328	-0.701079	-1.04275	1.07526	-0.0458687	0.0258109	1.73113	1.71897	-0.634968	1.87575	-0.0324988	0.679628	0.551615	0.589056	0.0807285	1.01102	0.0880008	-1.64596	-0.485696	-1.17828	1.19317	-0.414565	-0.679935
AACCAAGGTCCATTAA-0	0.445674	1.2986	0.740638	-0.198935	0.949758	-1.94345	0.922602	-0.147659	2.2979	-0.935303	-1.39849	-0.265136	0.303935	0.496595	-0.604182	-0.657046	-0.667096	-0.769252	-0.55297	0.797708	1.29788	-1.17553	0.588282	-1.33363	0.959245	1.41713	0.780301	-0.498232	1.09313	0.301751	-0.636425	0.195511	0.445577	0.682917	0.903993	-1.00038	0.459138	-0.074178	-0.717264	-0.195847	-1.12151	-1.06507	0.48421	0.219736
AACCAGCTCGACCTAA-0	2.2941	0.747439	1.1871	0.724736	0.57976	-0.790697	-0.926046	2.1813	0.598702	0.160859	-1.35081	1.80027	-1.15336	1.3832	-0.318619	-2.38931	0.664826	0.740409	-0.389554	0.310948	1.02221	-1.60845	1.47784	-1.50979	0.699981	-0.534293	0.000443494	0.86977	-0.340797	-0.593406	-0.260918	-0.0638189	-0.745967	-0.850684	-0.859318	-0.0295539	0.693565	1.10206	1.15691	-0.452701	0.666644	0.544009	-0.409999	-1.64079
AACCATTAGGTACGTC-0	0.611857	-0.744254	1.05677	1.96489	-0.258034	1.57334	0.678459	-0.435477	0.107337	1.3716	0.959214	0.892988	1.35312	-0.767117	1.12772	1.07777	1.3209	-0.377335	-0.744291	-1.00814	1.18537	-1.33599	-2.02063	-0.888305	-0.656639	-1.37706	-1.32907	-1.19658	-1.00654	1.7962	2.09086	2.10979	-0.511714	-2.58499	-0.112672	-1.03431	-0.505556	-1.95757	0.539495	1.55573	-0.0979626	-0.83407	0.815937	1.13555
AACCCAATCCCTGTAT-0	-0.56038	2.90529	-0.324227	-0.922652	1.55841	-0.0701291	1.48866	-0.864095	-1.16066	0.599321	-0.505034	0.715665	2.23507	-0.914717	1.02056	0.574983	-0.581864	-0.374501	-2.34811	1.20043	-0.518542	-2.31447	-0.92826	0.749702	3.3377	0.989499	-1.15339	0.593456	0.475464	-1.63373	1.55258	0.844761	0.00336211	-0.519982	-0.0300185	-2.33095	-1.30274	-1.2122	-0.834108	-0.604697	-1.01899	-0.133465	0.989412	0.0547834
AACCCAATCTATCACC-0	-1.03954	-0.430982	0.570523	0.413195	-0.544413	-0.568543	-0.110733	-0.493328	1.65433	1.09448	-0.508806	-0.529427	0.880649	-1.38415	-1.43378	1.46845	0.995898	0.465294	1.0973	-0.705741	0.274595	0.606717	0.244315	-0.988235	-0.585912	0.126938	0.747675	-0.802379	-1.09762	-1.15905	-0.0255885	1.02166	0.273926	-0.086466	0.105387	0.840419	0.216272	1.79569	-0.929821	-0.146354	0.501863	-0.4026	-0.000853247	-0.31591
AACCCACAGGATCTCA-0	1.24031	-0.832526	1.40486	-3.81886	-1.97915	1.74666	1.3961	-1.40307	-0.762599	-0.429813	0.316859	0.645493	-0.394441	1.33252	-1.4302	1.71954	0.0426704	-0.295559	1.45038	-0.221851	-0.686977	-0.688857	0.174821	-0.68375	1.22264	-0.841822	0.338914	-0.9926	0.266742	-0.924575	-1.72072	2.67086	-1.75592	-0.115366	-0.91241	-0.20775	0.506677	2.79976	0.885609	-1.22152	2.32454	1.81788	-4.24477	0.669799
AACCCAGCATGAGTTA-0	0.197307	1.36984	-1.14736	-0.627147	-0.410005	-0.14634	0.234094	-1.03536	-0.513597	-0.927729	0.664236	-1.33582	0.954422	-0.705151	-0.711188	1.45626	-0.650894	0.214255	-0.386534	-0.383859	-1.09716	0.855846	0.468371	0.825895	-0.890211	-0.621179	0.179848	-0.0624048	-0.347622	1.01887	0.0246726	0.379501	0.0941759	0.181896	-0.639792	0.413952	-0.952027	-0.69034	-0.321337	0.181852	1.63672	1.32658	0.0270005	-0.291638
AACCCTAAGCCTAGAC-0	-0.0646691	0.061597	0.0743622	1.28599	0.805111	0.185381	-0.949183	0.438391	0.119051	2.51995	0.764163	0.172179	0.272106	0.437446	-0.919314	0.297228	0.184025	-0.899926	0.72098	0.736985	-0.690176	0.241582	-1.1841	-0.0856938	0.787084	0.321963	-0.317199	0.116361	-0.999892	-0.667121	1.17568	-0.517744	-0.104707	-0.798453	1.22392	-1.12896	-0.551539	0.00840337	-0.554182	-0.923383	0.0125697	0.307673	-0.050924	-0.104423
AACCCTAAGGTCCCGA-0	-0.0542908	-0.0273368	1.41847	0.205249	0.157751	1.35155	-0.0973355	-0.20523	0.445561	-0.451759	1.04264	-0.437289	-0.688912	0.249825	-2.48107	0.949134	-0.743371	0.901573	1.53759	-0.55622	-0.456813	1.0715	-0.509167	-1.74582	-0.459751	-0.0761	-0.458258	-0.603309	-1.86912	0.880591	0.736461	0.626062	-0.101316	0.052622	-0.633792	0.986276	-0.477531	-0.147026	-0.738891	1.13648	0.268773	-0.356722	-0.50837	1.86988
AACCGATCATAGGTTA-0	0.881811	-0.0571734	-1.10746	-0.358747	0.996041	0.209757	1.62089	1.98963	0.489245	2.4414	-1.88205	-1.12402	2.49327	0.0708256	1.66228	-0.326437	-1.48317	1.10067	-0.417083	0.769894	1.81627	-1.69152	-1.72141	-3.93895	1.78311	0.870833	1.6005	0.390857	1.39008	-0.445898	-0.409551	-0.794551	-1.19701	-1.57408	1.01801	2.42702	0.166608	-0.719794	0.5629	0.16869	-0.480671	-0.415411	-1.12521	1.11818
AACCGGGGTCAACCAT-0	-1.61888	0.312473	-0.0271927	-0.595592	2.1404	-1.57129	-0.398594	0.556402	-1.34552	0.830323	0.85036	-0.46586	-1.08928	1.21275	-0.71088	0.733982	-0.172676	-1.21342	0.238783	-0.754066	-0.146401	-0.159319	-0.364681	-0.183008	0.0998846	-0.550841	1.17069	0.825317	1.88371	-1.35165	-0.323866	0.668428	1.63621	-0.737349	0.889824	0.260601	0.111625	0.0245152	-0.138571	1.92286	-2.25546	-1.35953	0.488254	0.409422
AACCTGATCAGCACGT-0	0.783135	-0.832978	-0.254272	-3.54125	-0.777807	0.796069	0.799075	0.925151	-2.31826	0.862018	0.0559191	0.330667	0.584706	2.39856	-1.63633	0.609147	-0.970367	-1.21106	0.652594	0.324412	-1.45935	-0.602048	0.419669	-1.18094	1.56619	2.1692	-0.0598958	1.21898	0.175664	-1.0563	0.939095	2.56684	1.96828	0.718336	0.758775	-1.39621	-0.554846	1.57737	1.20536	-2.53699	-0.52111	-1.06584	-0.180978	-0.00825597
AACCTGATCCGCCAAG-0	1.96437	-0.978684	-0.33882	0.973042	0.137147	-0.883731	-0.0399724	0.202004	0.613018	1.80127	0.123057	-0.238892	2.09382	0.517069	0.937566	-0.730093	1.60091	1.15488	0.283577	-0.530907	0.438286	-2.52818	-1.3102	-0.200147	-0.353805	0.0465228	-1.5192	-0.824691	-1.33384	2.23046	1.13145	-0.432085	1.79976	0.577189	0.716139	-1.69108	2.38632	-0.105171	-0.559236	-0.711416	-0.92111	-0.74463	0.549511	0.171254
AACCTTGAGCCAGCAT-0	0.540269	0.339392	-0.172671	-3.10495	1.56478	-0.907939	0.144679	-0.0291912	-0.994116	0.545838	-0.874347	-1.06747	-1.98176	1.26411	-0.413154	-3.16145	1.01641	0.219087	-0.407624	-0.777503	2.6659	-0.94741	-0.130379	-0.789539	0.326973	4.39051	-0.905855	0.240224	0.392397	-0.460404	1.25578	0.438162	2.20324	-0.161313	1.9097	-1.65792	0.968524	-1.59437	-1.60508	1.91709	-1.96158	-0.458842	2.8401	-0.888303
AACCTTGAGGCATGTC-0	-0.71328	0.657606	-0.173371	-0.0573052	-0.94713	0.0462135	0.794246	0.728664	0.60904	0.982661	-0.96277	1.3729	0.687713	-0.111159	0.189997	0.637621	0.0374243	-0.110719	0.764195	0.000567827	-0.0277755	-0.538727	-1.23059	0.50442	0.120182	0.26033	-0.424858	-0.823231	-0.637197	-1.15618	-0.167421	-0.258555	-0.961528	-0.518421	-0.566797	0.0232135	0.0697801	0.0270967	0.316589	-0.382507	-0.274928	0.460419	0.254302	-0.191468
AACGAACAGATAGGTA-0	1.81555	-0.0230364	0.107539	0.313916	0.907238	-0.143839	-0.532063	-0.264589	-0.110711	1.6868	0.508159	0.742497	0.587621	-0.44812	-0.743454	-0.303997	-0.0903415	-2.18502	-0.953958	-0.656544	-0.451749	0.180216	-0.594456	-1.72391	0.166656	1.0349	-1.08686	0.896791	-0.36745	-0.417215	0.757976	2.82418	-1.07062	-0.280598	-0.568916	-1.46775	-2.66717	0.0848061	3.05569	0.723927	0.159946	1.7881	-1.4848	-0.120537
AACGAATGTAATCGTC-0	-1.56458	-1.24338	-0.928812	-0.232904	-2.39851	1.15855	-0.407681	0.666273	0.744594	-1.98275	2.62606	-2.26295	-0.0438139	-2.35097	0.14271	-0.457454	0.169313	-0.313992	1.22331	-2.02607	-0.4588	-0.253761	0.48973	2.75723	-0.153361	-2.74376	1.14893	2.70768	-1.77126	-0.409613	-0.0711488	0.0855091	3.385	-1.84841	-1.26018	-1.67731	0.881563	-0.320724	0.239983	1.0516	1.98448	1.51751	0.296832	-0.567602
AACGAATGTGATCCGC-0	-0.672476	-0.848811	0.0125778	1.35687	-0.97403	-0.654657	0.621997	0.208578	1.43601	-0.746138	-0.071946	0.833681	0.886829	0.125153	1.46178	0.256264	0.665571	0.625369	-0.730872	-0.0239466	-0.613971	-0.132382	-0.0772473	0.863228	-0.0263292	0.0547466	0.200407	-1.05157	-0.416027	-1.11188	-1.37238	-0.77403	-0.186772	-0.138113	-0.325461	0.00909263	-1.03217	-0.296492	-0.202301	1.28457	-0.186625	-0.617282	1.83042	0.210408
AACGAATGTGATGCAA-0	0.706738	0.375161	1.52655	0.862307	-0.377066	0.0345313	-0.0476324	-1.75392	0.380493	-0.503685	0.126067	-1.06158	0.774775	0.624314	-0.711621	-0.169549	0.0908323	0.967824	-0.224259	-0.075236	1.21105	0.158834	1.10855	0.311266	-0.276485	0.104849	-0.664784	-0.534839	-0.783125	-0.568262	0.879406	-0.49469	0.945735	0.823064	-1.13631	-0.290663	0.660931	-0.320249	-1.27096	-0.413487	0.838233	-0.178207	0.223442	-0.129913
AACGAATGTTGCGATT-0	1.38076	-0.722154	-0.600389	-0.82783	-0.299499	-1.29525	0.281068	-0.822359	-1.25531	0.391228	-0.08586	-0.538714	0.368603	-0.67398	0.0435799	0.0756165	0.716084	0.570625	1.31035	0.128755	0.922207	-0.479084	0.740961	-0.508957	-1.32696	0.332798	-0.277057	-0.0907968	-1.29616	1.57686	0.40288	-0.337471	0.277965	-0.177334	0.361863	1.09037	1.43211	0.483657	0.0189315	0.622691	-0.931268	0.229741	0.142105	-1.06522
AACGACTCACCTTCAA-0	0.326123	0.147096	1.69888	-0.592631	0.519834	-0.651577	-0.500724	-1.97822	-0.231936	-0.293737	0.277244	-0.720117	0.0659572	1.65822	-0.0296723	-0.506604	-0.253628	-0.707099	-0.535083	-0.882665	-0.688705	0.31394	0.907207	-2.20119	1.18495	0.930287	-2.16291	-0.976692	-0.416011	0.0934682	1.50222	0.443435	0.745035	1.02767	-0.664049	-0.358709	-0.534591	1.43168	0.338935	1.04451	-0.62929	-0.326426	0.0128157	0.744497
AACGATCCAGCTACGA-0	-0.121016	0.149572	1.41498	-0.269251	-1.73328	1.15502	1.41875	-2.15793	0.173876	0.478826	1.89029	1.27493	1.38353	-1.41472	-0.51626	1.91439	0.618203	0.867283	0.99251	0.90776	0.654897	-1.88562	-1.44098	-0.734534	0.470929	-0.133474	0.86225	-1.34335	-1.96686	0.234861	0.255536	0.860601	-0.470506	0.56297	-0.384919	0.954078	-1.622	-1.16495	1.30044	-0.974416	0.378161	3.00702	-0.961993	-1.11778
AACGATCCAGGAACGG-0	-0.25094	3.35767	1.99147	-2.26497	-0.479587	0.551401	-0.0795213	-0.653973	2.89487	-0.0956281	-1.94279	0.47127	-0.994013	-0.621562	-0.240299	0.540046	-1.44922	-0.33793	0.509538	0.771564	0.390607	0.411289	0.0971619	-0.721139	0.641534	1.02427	5.88768	0.86945	-1.16584	-2.92113	-0.68522	0.821898	0.395174	0.453231	-2.14673	0.291998	-0.1052	0.836371	0.345947	-1.70573	-2.36782	3.18269	-1.5021	-0.814896
AACGATGGTAAGCGAC-0	-0.233475	0.232967	-0.949369	-0.757714	0.871575	1.00233	-0.226391	-0.221815	-1.28142	1.04077	0.825085	-0.731983	0.122352	-0.292223	-0.34662	0.778069	0.428714	-0.405033	-0.128395	-0.313479	-0.135211	-0.758103	-0.291597	-0.785495	0.503628	0.506578	0.068691	-0.560003	0.124427	1.7713	1.12249	0.409866	-0.286367	-0.193423	-0.316794	-0.46578	-0.0124834	-0.633019	0.186363	0.0533687	-0.524039	0.796931	0.353043	-0.0558257
AACGATGGTTAATTCG-0
AACGCAAGTTAGCAGA-0	1.52229	-2.37661	0.392938	-2.39345	-1.11894	1.47648	0.701216	-0.330229	-0.432574	-1.00122	-0.14127	0.830729	-1.20736	-0.203262	1.17814	0.573989	-1.74801	1.31848	1.91643	0.0042424	1.25577	0.512435	0.524142	-2.16002	-0.554092	1.90009	0.588038	-0.749339	-1.77825	0.305541	-0.0523222	-1.25425	-1.78112	-0.221024	1.37965	2.23292	0.606118	2.45327	0.2941	0.831204	0.0899301	-1.38771	-2.15762	2.14611
AACGCCACAACCTGAG-0	-0.114424	-0.0149791	-1.7585	-0.89479	1.36792	1.43777	0.307635	1.33968	-0.462853	-1.06339	0.598204	0.345314	0.579642	-0.724624	0.811353	0.236528	-0.851846	1.25717	-0.845015	-0.191188	-0.918426	1.73862	-0.155095	1.77015	-1.1332	0.314347	0.616211	2.00563	0.524059	-1.48136	-1.69034	-0.716712	-0.333525	-0.56528	0.077805	2.83727	0.24141	0.280026	-1.74182	3.44916	0.741304	-2.26898	0.0454816	-0.0881668
AACGCCACACATGCCT-0	-0.00892733	1.37897	0.810258	1.34319	-0.693242	0.738576	-0.639281	-1.67499	-2.06683	-0.496895	0.50978	0.176943	2.61571	0.442172	0.664407	1.04672	-0.177816	-0.894701	-1.63676	0.575832	-1.68319	-0.0629556	-0.535746	-0.43655	1.18187	-1.10134	-0.0835498	0.459085	-0.343478	-1.24026	1.64424	-0.542916	0.692477	0.0552287	-1.0295	-1.01163	-0.499976	0.740075	-0.600271	-1.23391	-1.41552	1.10732	1.15414	0.302969
AACGCCACACTAATCT-0	-0.38482	-0.786878	-0.0260497	-0.519097	0.0141333	-0.352602	0.948977	-0.257937	0.963253	0.0474408	-0.0994911	0.00744065	0.219819	0.0811514	-0.0769657	-0.289819	1.05212	-0.0607508	-0.235957	0.36938	0.10256	-0.0171651	0.723008	-0.426142	-0.377152	0.263865	-0.237907	-0.0135561	-0.0429064	-0.549196	0.421519	-0.22201	0.0138886	-0.0933992	1.05803	-0.0715385	0.467458	0.629213	-0.345395	-1.31237	-0.21129	-1.13818	0.167903	0.0346091
AACGCCACATCGGCTT-0	0.0066201	-0.381935	-0.415079	-0.873129	0.639952	-0.711809	-0.00688473	0.54569	0.278699	-0.910644	-0.350343	-0.74434	-1.18951	0.144641	0.942525	-0.0804511	-1.81749	0.981671	-0.394782	0.836556	-0.0347296	0.852308	0.568692	0.37888	-0.444683	-1.56917	0.669262	0.920602	0.670714	-2.06118	-0.577507	-0.121171	-0.530121	-0.56791	-0.231017	0.0290252	2.34603	0.0741549	1.00715	0.586064	0.977296	-0.50914	-1.48492	-0.0305357
AACGCCCGTTGCAGTT-0	-0.107789	0.748898	-0.0464088	-0.41037	1.49808	0.0559611	-1.71092	-0.733722	0.0221277	-0.254209	0.577489	0.641373	-0.00382269	0.862995	-0.450632	-0.38021	-3.08235	-0.868123	-0.211164	1.15043	-0.877734	0.0311009	0.856713	-1.68837	0.546531	1.23423	0.657697	1.19268	-0.65847	-1.37709	0.420976	-1.06492	0.558779	1.99574	-0.345271	1.01456	0.000295059	0.475146	1.30255	-0.256096	-0.641601	0.443307	0.0469029	0.315529
AACGCGAAGATAGTAG-0	0.419423	0.259261	-1.35864	0.64945	0.435167	0.51499	0.000615779	0.86937	-1.58848	0.0844065	0.485586	0.30558	0.0750257	0.122869	0.83004	1.39436	-0.306762	-0.153575	0.0214198	-0.209207	-0.380004	0.978182	0.281942	0.866928	-1.49779	-2.20567	0.709857	0.123482	-0.272057	1.59144	-1.32315	-0.289902	-1.34251	-0.29907	-1.40788	0.351721	0.996111	-0.490629	0.864671	0.411427	1.98756	-0.790853	0.673855	0.0990684
AACGCGCCACTCATCA-0	1.06736	-0.118087	1.36871	-0.659791	0.856597	0.790502	-0.023078	-0.291289	0.708464	-1.31678	0.874212	-0.720419	-0.662724	-0.573135	0.98779	-0.199329	-0.482635	1.29532	0.635312	0.165606	0.634187	-0.826256	-0.423028	0.566343	-0.865862	0.864892	1.2695	-0.56164	-0.50851	0.963917	-1.52852	-2.01256	-0.587703	-0.464948	0.823982	0.398341	-0.417084	-1.00685	-0.585666	0.931612	0.780068	1.40375	-0.959109	-0.249146
AACGCTATCCTCACCA-0	0.496411	-2.21347	-0.115396	0.900629	-0.394033	1.31329	-0.232612	-0.538281	-0.866165	0.894283	0.266614	-0.786793	-0.711608	0.122956	2.09633	-0.071388	1.41775	-0.155809	1.2091	-1.09066	1.38769	-0.501601	-1.99885	-1.33023	-1.20047	-0.506454	-1.10718	-1.17801	-0.60844	2.05324	0.262752	-0.913016	1.41292	-0.347193	2.1056	0.398879	-0.0182245	-0.784226	-0.211875	0.558942	-0.0340231	-1.89831	1.13764	0.728808
AACGCTCAGAAGCAAC-0	-1.01783	0.0525746	-0.178414	-0.00791343	0.92505	-0.00980027	-0.95786	-0.19523	0.0864398	-0.39952	1.10066	0.209306	0.711173	0.548334	-1.05703	-0.671175	-0.99087	-1.3229	0.528143	0.502412	0.194849	0.184959	-0.165114	0.83389	-0.7664	0.500031	-0.721091	1.84289	0.122603	-0.105788	-0.505064	-0.208872	1.64955	-1.28827	1.74393	-0.508695	0.610284	-1.29676	-0.810617	0.402465	-1.60253	0.0604295	0.880414	1.3515
AACGCTCAGCCTAGAC-0	-1.03687	0.112463	1.08851	2.32955	1.98618	0.294267	-0.295844	2.77561	1.18337	1.24186	0.900879	1.75846	-0.487811	-1.12227	-1.57778	-0.0265353	1.55809	-0.65997	-0.0528291	0.686964	0.67842	0.279548	-0.249844	0.224912	-0.670617	-1.65999	-0.0452301	1.54755	0.0927114	-0.632248	0.610495	-0.268013	0.659032	0.644833	0.955246	-1.26424	0.712576	-3.29726	-0.237197	-1.11489	-0.963079	0.379533	0.773187	-1.49404
AACGCTTGTCTGGTCA-0	-1.19433	-1.30987	1.76446	-0.0628853	-0.562954	-0.675343	0.462974	0.290229	-0.804439	-1.24169	0.571246	-0.937156	0.56106	-0.0298021	1.11143	0.168657	-0.826972	-2.56074	0.618245	-0.566303	-0.145234	1.18518	1.70052	2.16558	-0.130142	-0.138154	0.226611	1.56303	0.544648	-2.87578	-1.42152	-1.32008	0.290063	-1.67916	-0.370146	0.134567	1.77632	0.281104	1.26562	1.2379	-1.90294	1.04428	-1.35937	-1.44713
AACGCTTGTGAGGCCA-0	-0.590867	0.0246083	0.512115	0.495599	1.15993	-0.854825	-0.141326	0.689108	-0.140459	-0.246868	0.89688	-1.62123	-0.23175	1.19086	-0.3757	-0.516358	0.0980989	0.820698	0.579428	0.494079	0.801024	0.726181	0.135529	-0.0488411	0.757561	-0.363834	-0.892684	-2.04536	0.403485	-0.260734	-1.02287	-0.00892268	0.399173	-0.0972022	-1.08128	-0.122929	-1.23616	-0.0669283	2.62846	0.576435	2.07915	-0.385466	1.06532	-1.5446
AACGGATAGCGAACTC-0	-0.773531	-1.00272	1.22049	0.222348	0.83069	-0.116946	-0.674938	1.44229	-1.64346	-0.150374	0.113275	-1.02601	-1.36154	1.60297	-0.107532	0.288128	1.47349	1.1722	-0.724109	-0.0141238	2.38836	0.807304	-0.252578	0.32284	-1.0641	-1.07347	0.898836	-0.636265	1.07484	-0.158808	0.461886	-0.676743	-0.0940865	2.35452	1.62322	0.654636	-0.242401	-2.10181	-0.76377	-0.844855	0.599211	0.776124	0.822393	-1.33258
AACGGATAGGAGGATT-0	-1.05651	-0.0281894	0.479587	-0.335953	0.0844118	0.228618	0.709799	-0.369199	0.574554	-1.16295	-0.204325	0.680484	-0.867193	0.0144139	-0.364877	0.271012	0.463948	-0.427469	-0.664332	-0.912651	-0.150728	0.262144	-0.114928	-0.000592021	-0.10859	0.18644	0.592741	-0.472939	0.254987	0.95082	-0.464097	0.397616	0.912507	0.0731457	-0.388165	0.0552339	-0.141351	-0.295252	-0.783707	0.520547	0.238977	-0.138582	-0.602319	0.755463
AACGGATAGTAAGTTC-0	0.668971	-0.821421	0.931981	-0.477799	1.13099	1.45808	0.169564	-0.927185	-1.2229	0.711672	0.611635	0.231812	1.22054	-0.869948	-0.670963	0.661938	0.114996	-0.233441	-1.24143	0.168081	-0.60515	-0.647263	-0.590937	-1.01155	0.541339	0.448637	0.298731	-0.0805704	0.00568004	-0.189789	1.13622	0.330409	-0.364337	-0.939971	1.20167	0.0992203	-0.190311	-0.958212	-0.648432	-0.255361	0.256861	1.06289	-0.0166974	0.0342287
AACGGCGGTGGCTAGG-0	-1.45454	0.0741367	0.231856	0.293371	0.146775	0.934948	0.075012	0.555343	1.76786	-0.658388	0.187752	-0.274615	-1.90738	-1.14037	-0.976885	-1.97204	1.74778	-0.128367	0.382775	-0.328472	1.69046	1.47521	-0.0393532	-0.227657	-0.434214	0.70678	-0.289232	1.06771	0.922285	-0.586386	-0.0992122	0.814657	0.048468	-0.379478	1.08948	-1.4197	-1.47127	0.565065	-0.015429	0.548949	-0.0494283	0.197621	0.338849	-1.36744
AACGGTAGTCTCAGCA-0	-0.0372374	1.73893	0.942916	0.193187	-1.06062	-0.00345818	-0.869983	-1.06415	-0.93756	-0.00178841	-0.0399126	-0.991459	-0.290665	-0.783828	0.602505	0.829523	-0.183796	0.109252	-0.200539	-0.702365	-0.642562	-0.737024	-1.38366	-0.16012	0.871252	-0.605398	0.881353	-0.226367	0.296691	0.452316	-0.375616	0.0553115	0.595827	-0.0438349	-0.845549	-0.240292	0.0783708	0.095285	-0.515006	0.141103	0.523895	0.564922	0.317531	0.219532
AACGGTAGTTAGTGAG-0	2.80489	1.10811	0.251029	1.05617	0.634512	-1.89702	1.35545	-0.181491	0.474751	-0.538602	-1.0328	-0.313099	1.3819	-0.0403739	-2.13565	0.0878894	0.211097	0.269597	-0.581288	1.46818	-0.866892	0.635594	0.0475624	0.63532	0.143412	-1.40833	-0.280984	0.952752	0.0939456	0.931597	0.553764	-0.330298	-0.352982	-1.78257	-0.385085	-0.047228	0.670832	-0.687298	1.15028	-1.17454	-0.974532	0.592187	-0.297501	0.252864
AACGGTAGTTTGGTGT-0	-0.368572	1.26137	0.400017	-0.116086	-0.264741	0.401565	-0.118933	0.145823	-0.198967	-0.592077	-0.0775505	-0.186343	-0.76128	-1.05492	0.581097	1.61688	0.0140603	0.780682	-0.959507	-0.671768	-0.42131	-1.02947	-0.0707971	-0.461244	-0.179899	-1.67024	-0.242709	0.0359207	1.48423	0.633645	-0.408548	0.602575	-0.0469249	0.968609	-1.52795	1.31633	0.244373	-1.33225	-0.142106	0.0851312	1.0187	-0.525377	-0.384068	-0.218933
AACGGTGAGGAATGTA-0	-0.411297	-0.589951	1.82952	0.561046	-1.43948	-1.02624	1.03272	-2.12316	-0.189244	-0.555781	-0.653289	-1.12892	-0.11526	0.22881	1.59404	1.04368	-0.158453	0.324461	-0.56392	-2.02059	1.33145	0.27592	-0.072614	-0.471492	0.715398	-0.426317	-0.589532	-0.254081	0.206708	0.401209	1.41584	-0.0598925	2.27271	-0.762083	-0.805528	-0.738131	0.937294	-0.690502	-1.49258	0.358908	-0.307461	1.00527	-0.433548	1.018
AACGGTGAGGATGATA-0	1.40248	-0.441613	-0.642735	-0.421121	0.281496	0.503363	0.774728	-1.30803	-0.85043	0.841807	0.0391794	-1.09028	-0.142741	-0.0705719	0.204032	-0.456365	0.529675	-0.132993	-0.0234245	-1.68873	0.76751	-0.251782	-1.84861	-0.869569	0.229088	-1.14525	-1.41959	1.21847	0.100906	1.11156	0.861555	1.58273	1.93242	-2.62915	1.23486	-0.123404	0.596717	-1.36465	-1.72038	2.15858	-0.370474	-0.661915	-0.979095	1.57108
AACGGTGAGTGACCTA-0	-0.413835	-0.263872	-0.432913	-0.425081	0.429313	0.0987533	0.433791	-0.062493	-0.222936	-0.813575	0.352817	0.0339682	0.0252724	-0.338656	0.663963	1.2985	0.0456235	-0.613621	-0.259326	0.241905	-0.670052	-0.879106	-0.380603	-0.265831	0.0223207	-0.876038	-0.16088	-1.00375	1.15223	1.31849	0.438943	0.222478	-1.3369	0.122988	-0.324891	0.393457	1.32228	-0.0992544	0.858657	-0.709799	0.682757	-0.4653	-0.63226	-0.419358
AACGTAAAGCGAGACA-0	-1.399	-1.25407	0.344825	1.08434	0.379784	-0.24597	0.724384	-0.559403	-1.71063	0.514771	0.0541841	-0.492106	1.57003	-1.08856	1.95613	1.60485	-1.47585	0.592476	-1.42306	-1.59595	-0.477333	0.287125	0.551532	0.725742	0.581145	-2.2631	-0.256424	1.35048	-0.831814	-0.320196	1.51825	0.0997222	-1.17373	-0.938455	-1.7447	0.622925	0.959243	-0.166492	0.821214	0.438434	0.499928	0.229865	0.499693	-0.340247
AACGTAGGTTAGTCCG-0	-1.61802	0.435253	0.841427	0.933146	-2.9032	-0.580202	0.215792	0.241488	-1.1556	-0.511246	-0.124359	0.332675	-0.107964	1.42424	0.318519	0.000585701	-2.36009	-1.2254	-0.871359	-0.600496	-0.574752	3.21703	2.06778	0.984931	1.6496	-0.294712	-0.141057	-1.87725	-0.496847	-2.40813	1.59809	-0.808603	-0.837449	-1.51683	0.735971	1.77388	-0.924072	0.786815	-0.722069	-1.45059	-0.0289819	1.66795	-0.192222	2.54013
AACGTAGGTTCGCGTA-0	-0.284618	-0.47108	-0.878754	-0.211256	-0.738743	0.354728	0.787255	0.23695	-1.0632	0.999864	0.42163	-0.633397	1.85073	-0.470361	0.911612	-0.649975	0.145042	-0.483101	1.03324	1.2244	-1.30241	1.30983	-0.996215	1.34096	0.335365	1.18513	0.62523	-0.199757	-1.23076	-0.908265	-1.56647	0.197871	-0.663518	-0.489421	1.51348	-0.750003	-1.55154	0.272908	0.0189328	-1.89843	0.380832	-0.816415	0.266949	-0.290859
AACTCAACATCCGTCG-0	-1.02692	0.880824	0.364035	0.770715	0.0436328	-1.64442	-0.29311	-0.996701	-0.758839	0.100633	0.281854	-1.00518	1.8307	-0.299521	1.34009	1.77974	-0.429751	-1.53002	-0.815741	-0.289804	-1.59265	1.13826	0.413663	0.517246	-0.464383	-1.62331	-0.244226	1.14011	1.02561	-0.301722	0.623554	-0.515215	-1.36914	0.281367	-1.50062	1.99259	0.52733	0.571279	1.23586	0.341795	0.137704	0.606278	-0.736161	-1.96674
AACTCGATCGTGACTA-0	-0.558041	0.638909	-0.365453	-0.387243	-0.138774	0.324662	0.10894	-0.877711	0.230954	-0.828502	1.50801	0.404496	0.123457	0.228202	-0.737655	0.596956	-1.09326	0.41474	0.00770192	-0.572872	-0.408634	-0.423908	0.634823	0.530968	0.862829	-0.649914	0.171268	-0.57201	0.877961	-0.485795	-1.52375	1.04646	-0.657615	0.270425	-1.38384	0.335091	-0.386731	-0.188141	0.749724	0.218958	1.86557	0.862869	-0.00238242	0.621301
AACTCGATCGTTCCGC-0	0.439476	0.75424	-1.05543	-2.48679	1.02321	1.63792	1.22745	-0.955963	-1.53339	0.209268	-2.97948	-0.595645	0.358551	1.78435	0.10973	0.98862	-2.94863	-3.29554	-0.47409	-1.47255	-2.56251	0.585833	1.7122	-0.628003	0.663357	0.53546	0.317287	0.507456	0.45571	-1.59253	1.1903	1.60699	-0.700728	1.39273	-2.1505	1.26847	0.111632	3.70502	-0.433752	-0.784916	0.717556	1.58136	-2.45045	-0.678848
AACTGAAAGCGACTTA-0	0.518511	0.632064	-0.69909	-0.191769	1.6428	0.712425	0.64079	-0.323879	1.04099	-0.174276	0.660304	-0.176979	0.161254	-0.725521	-0.102365	0.0392548	2.27378	0.570768	-1.16265	0.335701	-0.51237	-0.318013	0.489328	-0.788517	-0.427708	1.82704	-0.369019	-0.846887	-0.552525	-0.597501	1.09761	-0.25917	-1.14222	-0.171589	0.287061	-1.81599	-1.08559	1.52786	-0.767387	-0.146165	0.256833	-0.27555	-0.742626	-0.960825
AACTGACCAAGGGATA-0	-0.886217	-0.512921	-0.178455	1.38116	0.257956	-0.693143	-0.104452	-0.999756	0.112068	0.205807	0.172481	0.801706	0.167977	-0.88781	-0.309666	-0.420957	1.71152	0.469707	0.445535	0.169365	0.832812	-1.00171	-1.31508	-0.197811	1.26133	0.183808	-1.02754	-1.30947	1.12137	0.794983	0.43628	-0.331086	1.0445	0.318242	1.77783	-1.73165	-0.765817	-0.466736	0.272994	-0.0881985	-1.70406	-1.35084	1.11204	-0.388452
AACTGACCACATGCCT-0	0.730638	-0.625473	-1.10675	0.99842	-0.0510818	-0.150382	-0.117322	0.121964	0.137286	0.443086	-0.0966454	-0.59555	0.7428	-2.53244	-0.305445	0.634828	0.264498	-1.23911	-0.925028	-1.1712	0.0477553	-0.258432	-2.24515	-0.710189	-0.276814	-0.0203921	-0.591522	1.07717	-0.130264	0.979051	2.1498	1.84225	-0.35981	1.01084	-0.0991506	-0.339116	-0.946472	-1.75992	0.835799	0.357886	-0.0503635	0.410478	0.352897	-0.264514
AACTGAGGTAGCGGAT-0	-0.335527	1.66797	0.382125	-0.743356	-0.499673	0.198983	-0.534391	-1.27457	0.792537	-0.246448	-0.45399	0.120742	0.289592	-1.74922	-1.3939	0.20255	-0.766483	2.86248	2.06808	3.11915	1.31583	1.32133	-0.140948	-1.79894	0.229578	-1.59598	0.534751	1.64423	-0.785006	0.370207	-0.943063	0.0285978	-0.631512	-2.90108	1.01304	0.41498	0.522565	0.151672	0.841879	1.95575	0.418808	0.727797	-1.47912	1.75562
AACTGAGGTTAGGCTT-0	-0.252992	-1.94007	1.44673	-1.25148	1.24711	-0.610587	-0.563768	-0.0819924	-0.970386	-0.136235	1.50255	-0.454211	-1.40747	1.42191	-0.674556	-0.254564	-0.100854	0.915647	1.48975	0.286019	2.1199	-0.434407	-1.02839	-0.405039	0.878682	-0.874427	0.142157	-3.01051	1.05209	1.17	0.216563	0.698959	2.07661	-0.398007	1.1162	-0.507152	0.841306	-0.357046	1.70317	0.207779	0.784738	-0.167269	0.837656	-2.10411
AACTGCATCATGACGC-0	-0.141669	0.473461	-1.71697	-1.09474	0.969966	0.174741	-1.09955	-0.778293	0.883401	-0.936314	-0.45359	-0.52604	-0.17457	0.328342	-0.336809	0.111625	-1.18836	0.107101	-0.869846	0.461309	0.212223	-0.0661032	1.64223	0.221943	1.19708	0.22277	-0.853924	1.69697	1.70181	1.61895	-0.159664	-0.0783485	-0.00214014	-0.0228965	-0.533878	0.977311	0.354122	-0.456672	-0.561461	1.07932	-0.19033	-0.743127	-0.350603	1.12223
AACTGCATCTGGTGTA-0	0.958822	-2.18728	0.490745	0.0586779	1.01132	-0.93393	0.638549	-1.36964	0.252042	-0.585292	-0.441079	-0.934297	-1.51799	0.979529	0.518148	-3.62737	1.19219	1.14152	0.908053	0.153326	2.47429	-0.417321	0.867237	-1.11913	-0.476259	1.78876	-0.92127	0.845787	0.231945	1.03174	0.0710668	-1.11226	1.96691	4.97003	0.625834	0.296209	1.64259	-0.975667	-2.09601	0.749602	-1.23418	0.141147	0.947721	-1.06922
AACTGGTCAAGTCCCT-0	-1.09775	-0.143095	0.826424	-2.39454	0.281913	-0.177766	-1.75819	-0.12093	-1.3943	0.374052	1.32857	-1.58857	-1.85324	-0.0339614	-1.89513	-3.10459	3.23069	3.72665	2.28651	-0.906932	3.52645	-0.408499	-0.490051	1.67747	-0.820882	3.42011	0.78951	-0.571377	0.789449	-0.618739	-0.053336	-1.26523	2.31951	2.77106	1.03934	-2.98583	-0.0173487	1.17139	-2.398	4.38356	-0.740406	-0.49135	-1.40783	-1.44866
AACTGGTCACTCAGGA-0	-1.05108	0.0803131	0.296364	0.313678	-0.331748	0.739821	0.177814	-0.608849	0.344509	-0.0233167	0.476103	-0.392926	-0.0152174	-0.61529	-0.628677	0.942815	1.26299	0.453576	0.117529	-0.767574	0.412692	0.130278	-0.356754	0.368201	0.0357738	-0.380475	-0.202954	-0.647846	0.965654	-0.336273	-0.286189	0.331494	-0.769498	-0.975451	-0.383711	0.360899	-0.365773	-0.263252	-0.35902	-0.294529	0.286783	-0.51786	-0.948965	0.660902
AACTGGTCATCATCAT-0	-0.885902	0.63061	1.12831	0.250034	-0.309074	1.77974	0.56128	-1.68859	-0.649928	0.0959975	2.62723	-1.08425	0.674315	-1.05113	1.18242	2.96295	-0.208584	-0.878752	-0.297408	-1.45708	-0.233899	1.35986	-1.24894	-0.8023	1.36388	-0.249974	-0.495035	-1.88474	-1.75287	1.23806	1.35466	0.58095	0.450834	-0.618862	-0.356093	-1.41422	-1.23196	-1.77675	-0.45032	1.45436	1.1312	0.389436	-0.239484	0.762999
AACTTCCTCGCGCATG-0	1.29403	-0.413131	-1.97788	2.15596	-0.791702	-0.213443	1.78751	0.357277	1.50087	2.82713	-0.912293	-0.0448331	1.20936	-1.05811	0.0770787	0.123136	1.91067	1.01308	1.35907	0.7647	-0.0957942	-2.36967	0.0205833	-0.866819	-0.609721	-0.192766	1.49177	0.576636	-1.84291	0.488192	-1.11676	0.546827	-1.86484	-1.63146	0.091324	-0.179378	-0.866301	-0.10884	-0.421467	-0.389152	0.00185602	-0.435117	0.253856	0.117295
AACTTCTCAAATGCAC-0	0.441532	-2.8578	-0.732968	-1.15287	-1.14423	1.64044	-0.342805	0.302986	0.980757	-1.13415	-0.156865	1.33788	-1.25563	0.398822	2.76959	-1.10981	0.37156	2.20784	0.569927	-1.11364	-0.462329	-0.465849	0.348967	0.787839	-0.193961	-2.15769	-1.02082	1.20429	0.525019	-0.00512128	-3.40958	0.728215	-1.86428	-0.0671109	0.293159	1.17827	-0.415129	-0.127301	0.577426	0.989591	2.21638	-0.844031	-0.0845465	1.27642
AACTTCTCATGTCGGA-0	0.360118	1.4138	-1.53994	-0.356783	0.427592	-0.83712	-1.48528	-0.294645	-1.54678	1.58307	0.642601	0.69966	2.06644	-0.317634	0.0465339	0.126289	0.912177	-2.23895	-0.993641	-0.7203	0.00793542	0.180502	0.0965517	-0.363575	0.955504	1.11644	-0.605608	1.39219	-1.59516	-0.854632	0.372255	0.901264	-1.70537	-0.00137789	0.198914	-1.55193	0.818013	1.58969	1.33446	-0.933268	-0.069976	0.54394	-1.9849	-0.887794
AACTTCTCATTACATC-0	-0.399815	-0.0208978	0.635303	-0.980575	0.996309	-0.904282	-1.11833	0.588956	-1.32938	0.111478	0.371182	0.658844	-0.165893	0.776716	0.660638	-0.425844	-0.197063	0.183029	0.886192	0.512849	-0.847473	-0.296148	-0.797102	0.939716	0.598979	1.39843	-0.424501	0.0902533	-0.522129	-0.752468	-0.525666	-1.27786	1.12206	-0.531698	0.201356	-0.47038	1.32089	0.853089	-1.12521	-0.54053	-0.532036	-1.03799	-0.208592	-0.840037
AACTTGGTCACGCAGT-0	0.355884	0.196096	0.77212	-0.439189	-1.21981	1.3893	2.05238	-1.43637	0.371752	-1.16868	-0.782847	-1.43942	-0.22552	0.720252	0.0644214	-0.261422	0.743169	1.86911	-0.0447363	1.96752	1.96601	0.694247	-0.149164	-1.50067	0.922659	-1.20082	-1.75613	-0.26058	-0.321855	-0.684751	0.854696	1.9859	-0.767304	-1.99543	-0.699391	1.90644	1.29475	-0.448141	2.30432	-0.22477	2.01517	-1.23392	-1.29902	-1.71252
AACTTGGTCAGCTCGG-0	-0.253809	0.866044	1.17619	-0.449062	1.46279	-1.46274	-0.468874	0.633034	-0.545806	0.520638	-2.06451	-0.143004	-0.405181	1.71683	-0.8164	-0.33584	0.694419	-0.874923	-2.36066	1.8254	0.0523635	0.0749485	1.71324	0.124488	1.70024	0.928587	5.32192	-0.411479	2.92451	-2.20146	0.719933	0.583301	-2.04439	1.45707	-0.150867	-0.953307	0.207692	0.936934	0.0207604	-1.3682	-0.0875665	1.21878	-0.360959	-1.77519
AAGCAACAGGATGGTG-0	0.292629	0.545105	-1.76981	-1.06317	0.954497	0.220539	1.26594	-0.303124	-0.85146	-0.0910669	0.201729	-0.713358	0.922333	-1.03736	0.0186898	0.326488	-0.0396392	-0.127807	-0.477806	-0.263641	-1.37011	1.36602	0.725266	0.602554	-1.44195	0.129924	-0.236811	1.28674	-0.880844	0.700679	1.75702	0.0334344	-0.449876	-1.1348	0.571367	-0.785382	0.107684	0.0774458	-0.135912	0.0412216	0.102474	0.10797	-0.310562	-0.737607
AAGCAATGTCTGTGTG-0	0.287276	0.247785	-1.52944	-1.04674	1.51184	0.00974981	-1.65505	-1.25222	-1.87305	0.178308	0.297132	-0.834762	0.718033	0.837194	0.446139	-0.40826	-0.0740983	0.0178745	-0.331768	-0.883971	-0.756942	0.541471	0.667606	0.408021	0.0031373	0.790749	-0.687605	-0.0108829	-0.0714379	-1.11666	-0.12215	-0.701636	-0.169812	0.340726	0.893039	-0.0165291	0.372079	0.250577	-1.27368	0.425873	-0.294194	1.58284	0.118239	-0.0885061
AAGCAATGTGCGCAAG-0	0.859542	0.974656	-0.877057	0.922573	1.23836	-0.0996786	-0.325792	-1.11316	-0.440499	-0.368244	-0.138329	-0.0871831	0.172016	0.700844	-0.028328	-0.609578	0.552864	0.391711	-0.654222	0.347218	0.465266	-0.549104	-0.184268	0.282049	0.848497	0.493134	-0.474406	-0.0314743	-0.484713	-0.905319	0.915973	-0.164034	0.18771	-1.56917	1.02981	-0.597535	-1.57427	0.909252	-1.57008	-0.76315	-1.54251	0.636839	-0.0371427	-1.94227
AAGCAATGTGGGTATA-0	0.78066	0.275856	-0.32432	0.861535	0.0115561	-0.97425	0.211747	-0.153749	1.40344	-2.37944	1.89897	-1.04855	0.869676	-0.944128	-1.85197	-0.0549297	-0.412884	1.22678	-0.634427	-0.608928	0.610705	0.78564	0.457216	0.643454	1.73368	1.38212	0.86671	0.738938	0.20309	-0.839703	-1.13768	0.664498	-0.773438	-0.0230377	-1.16902	-0.620789	-1.15548	1.46663	0.295072	0.932928	-0.14711	-0.244397	-2.35228	0.97855
AAGCAATGTTTACCAA-0	2.43175	-0.745256	-1.16141	0.924501	-0.306666	0.930729	-1.29266	-1.52568	-0.517912	0.463608	0.291608	-1.57526	0.387744	0.0814368	-1.33914	0.552005	0.755925	0.753561	0.789746	1.48022	0.773366	1.69903	-0.0987783	-1.40119	0.189125	-1.61285	0.0981812	1.29287	-0.885239	0.857834	0.154676	0.652397	-0.185804	0.218679	0.00336701	0.607093	1.04653	0.110112	0.836703	0.547382	2.4151	1.42345	-0.884344	-1.07249
AAGCACCTCACTGGTA-0	2.11849	-1.4734	-0.298802	-0.898683	0.77959	0.26628	0.677992	-1.1864	-0.323233	-0.577361	0.299298	-0.364502	0.290552	-0.946565	0.699281	-0.432793	-0.973491	1.33278	-0.532056	-0.247454	1.06822	1.2888	-0.977576	0.289438	1.26075	0.771295	-1.47348	1.74653	-0.0998754	0.442747	0.401598	-0.576915	0.502631	-1.79771	0.716828	0.48946	0.855085	-0.636544	-3.70001	2.06955	1.1547	-2.14647	1.1488	1.77178
AAGCACCTCTCATCTA-0	1.42267	-0.317135	-0.71313	-0.824039	-0.262785	1.35859	0.274216	0.768045	-0.923929	0.427498	1.66447	-1.03209	-0.73771	-0.983654	0.196423	0.222601	1.58557	0.770741	0.757433	-2.30806	0.866205	1.03308	-1.17303	0.216368	-0.291897	-0.725669	-1.34642	1.13807	-0.291897	1.39942	-0.779374	1.14766	0.0715064	-2.0981	1.38606	0.416798	-0.159183	-1.47248	-1.52498	2.13752	1.34201	-0.264057	-0.394685	-0.395466
AAGCATCCAAGGTCGC-0	0.31613	-0.131	-0.618331	-1.01189	0.430972	-0.442443	1.77068	-0.905102	-0.906581	-0.478665	-0.124212	-0.257487	0.866174	0.218986	0.839516	-0.864769	-1.49026	-1.47808	1.49142	-0.738415	-1.6241	0.955076	-0.080004	-0.254279	-0.0731399	1.30435	-0.371435	0.645912	0.241712	0.551787	-0.166099	-2.72754	1.03037	0.554512	0.32911	0.14836	1.54599	0.931046	-0.812238	-0.00777081	0.138115	-0.780486	-0.277665	0.455921
AAGCATCCATAAGGTC-0	2.17846	1.13822	0.600999	-0.870149	2.04478	-0.678208	1.16806	-1.30556	0.475396	-0.166951	-0.176765	-1.17083	0.518053	0.109922	-0.847361	0.506463	0.311778	-0.269433	-0.426526	1.45335	-0.910301	-0.0732174	-0.197921	1.06978	-0.157075	0.11693	0.277972	-0.514431	0.201376	-0.281552	-0.411004	-0.393699	-0.76385	-0.449725	-0.729093	-0.665705	0.762716	0.543646	1.05274	-0.777182	-1.37292	0.168502	-0.590131	-1.50311
AAGCCAAGTGATCAAG-0	0.26146	-0.839955	-1.03008	0.0707681	-1.33167	1.23647	-0.169362	0.338865	-1.04184	-0.330356	0.154629	0.0407187	0.488008	-1.8109	0.257956	0.638213	0.408143	0.412008	0.733525	-0.0609638	0.384995	-0.688451	0.215689	-0.261927	0.828088	0.0929489	-0.209632	0.349586	0.122104	0.302511	-0.0595698	-1.07754	-0.169438	-0.0130564	1.14143	-0.0843883	2.70146	0.62964	0.395079	0.378327	0.205194	-0.258728	-0.72169	-0.908834
AAGCCAAGTTCGATAC-0	0.893861	2.22415	1.9383	0.0924373	-0.325614	0.444572	-0.0741263	-1.04627	2.48158	-2.05558	0.277309	0.0846038	-0.20938	-1.85055	-0.562594	0.474543	-0.455465	2.3705	-0.385732	-0.363084	0.32535	-0.0240179	-0.368347	-0.791019	-1.44308	-0.795257	-0.0078822	-0.905449	-0.693779	-0.643324	-0.710857	0.820776	-0.521349	-0.387871	-1.66652	1.39269	-0.0286474	-0.421396	1.3915	1.183	1.24479	-0.567214	-0.87112	-0.859226
AAGCCAAGTTGCGCTA-0	0.442151	0.191475	-0.255458	0.235657	0.316654	-0.642294	-0.673357	-0.722227	-0.721923	-0.19309	0.92899	1.6008	-0.121349	0.608888	-0.169332	0.629757	-1.66891	-0.952908	0.354106	1.68992	-0.292732	0.892296	0.482028	1.09329	-0.647824	-1.27703	0.423698	-0.0803694	-0.316508	-0.366921	0.105623	-0.898587	-0.77946	-0.714656	-1.87236	0.125848	0.830909	0.458807	2.04552	-0.731612	0.0493802	0.242764	0.144892	0.721046
AAGCCATCAAGGGAAC-0
AAGCCATCAAGTGAAG-0	-0.537928	-0.360959	-0.365103	-0.61518	-0.211094	0.513166	-0.307866	-0.36165	-0.900542	-0.447139	0.413696	0.777274	1.109	1.63243	-0.668089	0.288334	0.221697	-0.342187	-0.296442	-0.0438854	-0.692504	-0.911572	-0.522275	0.631347	0.570145	-0.815935	-0.48222	0.763737	1.30677	-0.24524	-0.427739	1.2201	0.315369	-0.24729	0.0612386	0.394452	-0.0773717	-0.758616	1.39616	0.456267	1.0205	-0.284395	-0.352485	-1.4716
AAGCCCCGTTCGCTAG-0	-1.63215	-1.8661	1.03182	0.418318	-1.05378	-0.480869	2.54091	-0.869618	-0.294266	-0.72493	-0.268822	-0.865765	0.754103	0.580433	0.0352464	-0.678092	-0.0425175	-0.522742	1.85249	1.1383	0.149818	0.373146	1.1348	-0.685759	-0.309862	0.517454	-1.10725	-0.806702	-0.0319888	0.514735	0.380908	-1.58841	0.950418	-0.0815178	0.748988	0.864848	0.725306	-1.04975	-1.03296	-0.987279	1.37649	-0.465401	0.468159	1.23248
AAGCCGCCAACGTTAA-0	1.12578	-0.653778	-0.136194	-1.43654	0.474455	0.255984	0.690924	1.3538	-0.444935	0.371001	-0.462894	-0.486823	-1.1877	0.283264	0.805976	-0.773175	-0.670301	0.821569	1.35654	-0.560873	-0.0291635	-1.28298	0.0311958	-0.563572	2.33726	1.07811	-1.10989	0.293448	-1.30573	1.92719	0.123029	-0.469257	1.23148	-0.125577	-0.417873	0.576295	2.51539	0.655831	-1.34046	0.708587	-1.46741	0.744416	-0.38555	0.195495
AAGCCGGGTTATCCAA-0
AAGCGATAGATTAGCT-0	-0.0566922	1.77489	-0.168306	-0.738472	-0.967362	1.6107	-0.587715	-0.308326	1.29535	-2.13246	0.508951	0.282706	1.02592	-1.75642	-0.93109	0.367808	-1.5432	-1.25247	-0.869101	-0.155455	-1.47017	1.28593	2.31865	-0.240515	-1.89916	-0.824294	-0.153473	1.40249	-0.491925	-0.452305	0.314279	0.757281	-0.440101	0.245784	-1.37706	1.43139	-0.228254	0.869784	2.47409	0.0539514	1.19573	1.79497	-2.55087	-0.155591
AAGCGCAAGCCAGCAT-0	-0.654519	-0.159136	-0.411697	0.408535	-0.670358	0.252693	0.191534	0.557759	-0.000137974	-1.27491	0.0652921	1.65213	0.382191	-0.423322	-0.536495	0.643358	-0.739072	-0.891746	-1.28785	-1.38293	-0.171129	-0.114582	-0.0445938	-0.122646	-0.523678	-2.1274	-1.04254	2.00561	-1.07093	0.858307	0.509893	1.79982	0.850587	0.326703	0.346193	2.24402	1.60564	-1.21863	0.784827	-0.359686	-1.34512	-0.881734	-0.207111	-0.157409
AAGCGCAAGGATCTCA-0	-0.808462	0.597534	-1.54643	-0.0129743	1.57345	-0.106739	-0.68407	1.77385	1.16692	0.459124	-1.25809	0.523196	0.177912	0.47155	-0.807733	-0.568285	-1.20486	-0.420493	0.0556338	0.429889	0.192842	0.93889	0.670801	0.739666	0.162652	0.654485	-0.669913	0.625027	1.02912	0.0641238	-0.860389	-0.192193	0.410513	-0.0259173	1.33017	-0.123501	0.24985	-0.747548	-1.49565	-0.379564	-0.312052	-1.79328	1.00332	1.76563
AAGCGGATCGATGCTA-0	-1.14009	1.11504	1.21905	0.470234	0.0492306	-1.97177	0.248324	-1.39689	0.030901	1.24662	0.989953	-1.24275	1.99967	0.0335007	-1.2053	-0.197224	1.22725	-0.351415	1.15183	1.34031	1.75349	-0.0137408	-0.642318	0.425266	-0.449513	0.879462	1.5261	0.492559	0.891412	0.0757859	-0.502494	-1.16799	1.89451	-1.51789	0.617991	-0.481953	0.154311	-1.1113	-1.66535	-0.674118	-1.21557	1.0166	1.74343	-1.15569
AAGCGGATCTAACTCC-0	-0.156362	0.226696	0.776554	-0.0843678	1.61518	0.20147	-0.0236078	-0.200182	-1.47178	0.922481	0.477566	-0.763048	-0.283005	-0.485146	-0.193396	0.15356	0.0875979	0.0635838	0.903346	0.868581	-0.244822	0.581651	0.478918	-0.644552	1.59397	-0.0217812	-1.18955	0.129407	-0.411075	0.454465	0.0618459	-0.60969	0.874465	0.161687	0.816788	-0.0510285	-0.368611	1.1468	0.303585	0.032634	-0.142725	-0.587843	-0.0974381	-1.54403
AAGCGGGCATCGCGTT-0	0.697096	1.11836	-1.11745	-2.75087	0.765778	-0.154141	-0.214019	1.94432	-0.0156951	-1.13427	-0.203685	-1.02307	-1.76353	-0.421976	0.532624	0.137984	1.58559	-0.0562063	-0.310758	-1.83189	0.463347	-0.379942	0.891303	0.432147	-1.52833	1.24444	0.191484	-0.0669075	-0.156389	-0.0412348	-0.124714	-0.971082	-0.0188657	-1.31192	0.0756801	0.816464	0.56783	1.80958	-1.39475	0.294743	0.185116	-0.329276	-0.366737	-1.3702
AAGCTAAAGATAGACA-0	-0.614122	1.40173	0.578479	-0.757279	-0.422221	-0.164419	-0.177283	0.694286	2.13696	-1.49017	-0.872744	0.229878	-0.741054	1.30924	-0.473949	-0.829174	-0.0820863	0.715131	0.599937	0.95797	-0.123603	1.02508	2.04555	1.6251	-1.46564	0.316861	0.439896	0.591492	-0.945245	-1.33777	-1.79813	-0.163568	-0.718722	-0.592674	-3.29782	0.175191	0.346596	1.24478	1.79334	0.867975	0.310424	0.802573	-0.0123882	-0.332304
AAGCTAAAGGAGCCTT-0	2.58204	-0.669321	-0.557248	-0.500506	-0.678498	0.507459	0.485498	-0.35626	0.215735	-0.918006	2.17587	-1.53274	0.198732	-1.5889	-1.31431	0.685825	-0.708873	1.69465	0.67782	2.17845	0.335165	1.43225	-1.0343	-0.125263	-0.825757	-1.06525	1.04539	1.51726	-0.173535	1.48054	0.450473	2.00776	0.439501	-0.602327	-0.231435	0.689712	-0.673302	1.26805	-2.91272	-1.52363	0.745611	0.573734	-1.36011	1.99698
AAGCTCGCAATTGAGC-0	-0.37757	0.55682	0.31494	-0.288456	0.981482	0.250714	-0.270363	-0.2784	-0.727631	-0.695111	1.28582	0.22332	1.5412	-2.00921	1.6606	0.640304	-1.44893	1.90842	-0.585876	2.23562	-2.00854	-0.639637	-0.445244	0.19487	0.302753	2.10314	1.29645	1.2909	-1.61725	-0.137387	0.176381	-2.24604	-0.113492	-0.26609	-0.333771	-1.05447	-1.70197	-0.700776	1.30281	0.82726	0.219232	-0.317922	0.663921	-0.646922
AAGCTCTGTTCCTCTA-0	0.184251	0.255602	0.947559	-0.165437	-0.58239	1.6865	-1.07256	0.17019	-0.656553	-1.26582	0.786459	-0.364168	-1.02537	1.09053	-0.998655	0.27443	-2.73082	0.766519	0.882033	0.333694	-0.647824	1.32171	1.48243	-0.796653	0.563785	-1.11972	2.08087	2.04615	-1.01325	0.892631	-0.941748	0.369819	-0.276386	-0.156577	-1.56323	1.43733	-1.10438	-0.660525	2.23952	1.70428	1.14708	0.121094	-0.10307	0.586083
AAGCTCTGTTCGTTCC-0	0.0420972	-0.661726	-0.138778	-0.894428	-0.460277	0.728562	-0.633126	-0.384716	-1.43068	-0.561454	0.83389	-0.790861	0.454365	1.5911	1.01865	0.592984	-1.87777	-0.732342	0.815354	-0.237201	-0.845415	-0.663684	-0.298067	0.0855802	0.98105	-1.13936	-0.508667	-0.528013	1.12327	2.84988	-0.210813	0.469948	0.326219	-0.0604449	-0.350627	0.806644	0.682915	-1.55848	1.69911	-0.879989	0.61503	0.725486	-1.26098	0.199504
AAGCTTGTCCTCATAC-0	-0.496761	0.344163	-0.670231	0.902497	-0.114867	0.569062	0.463945	-0.777708	0.448287	0.194287	0.229856	0.976783	0.499118	0.540211	-0.830006	-1.76428	-0.619281	-0.785385	0.104191	-0.124322	-0.0989165	1.67418	0.846349	-2.34175	1.62035	0.000307196	1.91819	0.658383	2.22827	-0.671404	-0.548939	-1.39193	-0.411386	-0.397961	0.103676	0.406812	2.32772	0.818342	-0.111464	-0.723376	2.35084	-0.567467	-1.13682	-1.26926
AAGGAAAGTATAGACG-0	0.365766	1.20857	-0.754261	0.301688	0.122133	-1.07584	-3.906	0.260092	1.39022	-1.77323	1.24065	-1.44338	1.88591	-1.59866	-0.879231	1.7391	2.4449	2.96295	-2.38186	0.82282	-0.0207526	2.46572	0.633373	0.19997	-1.29599	0.196165	0.963463	1.19426	0.676225	-0.221784	2.26055	0.571044	0.13991	-0.12891	-0.658541	0.132719	-2.26976	2.87011	-1.05936	0.441894	1.19828	-0.528067	-0.764783	-3.03867
AAGGAAAGTCAGCTCA-0	-0.944445	-0.114119	0.51951	0.690324	1.41377	0.387261	0.0381478	1.11476	1.30243	-0.44635	-0.617006	-0.492209	-1.26311	-0.39566	-0.786648	-0.675824	0.0960627	0.0432441	1.35131	1.66394	0.637352	0.883869	1.09921	1.90094	-1.24972	0.0138641	-0.677467	-0.770627	0.973266	0.157536	-1.7341	-0.673061	-0.91173	2.09763	-0.162192	-1.63628	-1.02288	-0.893278	0.537274	-0.781827	1.06127	0.656353	0.00734615	-1.21968
AAGGAAAGTCCATATA-0	-1.40187	-1.08631	1.46237	-0.820643	-0.359313	-0.999228	1.9976	0.383416	0.0930292	-0.880963	-0.907632	-1.82435	-1.30174	0.688604	0.847871	-0.514435	0.714409	0.212821	0.12924	-1.18761	1.76234	-1.32405	1.32806	-0.908635	-1.85507	1.3304	-1.4805	-1.70283	0.74524	0.0632164	-1.33279	-0.324828	1.64805	2.36539	0.460561	0.66469	0.318383	-0.00891819	-1.97726	0.684764	0.793154	-1.82323	1.86654	1.36699
AAGGAAAGTCTCCAAG-0	1.02682	-1.67323	0.806696	1.15331	0.0573303	-1.86549	0.398299	-0.808449	0.922811	0.429302	-0.709025	-0.0376664	0.388397	1.4558	0.559749	-1.93607	1.74551	-0.591533	-0.490951	-1.62455	2.66603	-0.386569	0.0507108	0.858061	0.650105	0.87977	-1.66032	-1.14605	0.350376	0.517507	-0.725175	-0.300134	0.486061	3.40296	1.44817	-0.18955	1.17036	-0.751263	-1.43881	0.8113	-1.43185	-0.0624699	0.797827	-0.992112
AAGGAAAGTGAGTGAC-0	0.363487	0.162609	-0.0587154	-0.0848825	0.111814	-0.427645	1.12223	1.29187	-0.364285	0.264114	0.506867	-0.825557	0.267687	-0.375737	-0.778232	-0.536976	0.726556	0.281957	1.74397	-0.62085	0.848918	-0.222504	0.345597	2.45234	-1.8915	0.0332324	-0.573236	1.72285	0.299387	1.29817	-1.64219	-1.06254	-0.134514	1.2718	-0.258369	0.0790715	1.42243	-0.954683	0.311027	-0.773082	0.159568	-1.11512	-0.699916	-0.407893
AAGGAAAGTTCAAGTC-0	-2.38249	0.477848	0.97926	1.73968	-0.534628	-0.644393	1.09374	-0.164258	0.70954	-0.412656	-0.512934	-0.534249	1.39154	-0.437808	-1.26446	-0.503056	1.94853	-0.273319	0.459456	0.372787	1.06654	2.35404	-0.797972	1.18629	-0.263928	1.29018	0.398065	0.16365	1.41459	-1.79144	-0.0287795	-2.24962	0.10323	-0.341964	0.308914	-1.57521	-0.537252	-1.45426	-1.27874	-0.579028	-0.274386	-0.162743	1.43966	1.03063
AAGGAAAGTTCGCTGA-0	0.425466	0.417139	-1.23297	1.01279	0.253156	-0.0187321	-0.602259	-1.15414	0.493921	0.39175	0.64333	-0.0529596	0.628574	-1.10838	-0.874675	0.401128	1.37453	0.313314	-0.624111	-0.447288	-0.452138	0.490046	-0.938899	0.369825	0.878653	1.01242	0.446403	-0.281196	0.314882	-0.852645	-0.306721	0.133501	-1.18029	-0.811188	-0.0228155	-1.94139	-1.30557	0.355144	0.145292	0.372665	0.689874	0.457038	0.455486	0.291366
AAGGAAAGTTTAGTGC-0	-0.880269	-1.2397	0.350147	-0.383239	1.77889	-0.856474	0.253088	-0.40336	-2.53214	0.649917	0.105162	0.20121	0.485129	0.628454	-0.872642	-0.851756	1.9997	0.802375	-1.09495	-0.343765	1.53693	-1.26339	-1.29602	0.746245	1.05517	2.07007	0.254336	-1.89916	-0.711072	-0.219051	0.94095	-1.13041	-0.428874	0.490664	1.652	-0.815993	-0.564409	0.78506	-2.02612	-0.0716523	0.371333	1.52273	0.0274677	-2.61516
AAGGACTAGGTAGCTC-0	-0.441676	0.196037	0.0725272	-0.444673	2.0726	0.982172	-0.0529776	-0.986194	1.15011	-1.12423	0.0416717	-0.305704	-1.64579	0.044225	1.69275	-0.457122	-1.64893	1.7532	-1.63824	1.51816	1.21648	0.566982	1.05704	-0.408776	-0.0242277	-0.650173	0.153589	0.123927	-0.645475	0.389395	0.102288	-0.265925	0.36299	-0.493175	0.0611969	1.19396	-0.529377	-0.338741	-1.63812	-0.756679	-0.397666	0.684218	-0.418419	1.29523
AAGGACTAGGTGAACG-0	0.138666	1.83808	-0.887635	-1.27905	1.83386	0.0480206	-0.665858	-1.4984	0.230234	0.591291	0.494021	-0.204415	0.573116	0.207171	-0.793841	-0.0189693	-0.219022	0.043073	-1.66078	-0.527192	-0.456212	-1.68923	0.42927	0.777627	0.453369	1.76093	-1.11948	0.983906	-0.272708	-1.56488	1.08385	0.473879	1.33176	-1.10441	-1.04393	-0.334185	-0.635386	-0.535236	-1.81703	0.0550656	-1.21258	0.35336	0.96857	-0.414171
AAGGACTAGTCGATGC-0	-1.01541	0.640608	1.33586	-0.310194	0.381774	0.453923	-0.381318	-0.716865	-0.776892	-0.74585	0.275433	-0.720086	1.03376	-0.0786369	0.104018	0.673173	0.286528	0.891208	-0.666661	0.573009	-0.579473	-0.236114	-0.816948	-0.447043	0.340169	-0.221982	0.422188	-0.518565	1.06412	-1.19555	-0.0531861	-0.626791	0.771023	-0.737017	0.228418	-0.396298	-0.165549	-0.717394	-0.699978	-0.0267411	0.96791	0.13114	-0.0732783	1.01551
AAGGACTAGTTAGCGC-0	-0.621874	0.832914	-1.20778	1.06717	0.799904	-0.0908771	-0.184616	-0.706331	-0.31511	0.516261	0.158838	-0.357264	0.608219	-0.0914389	-1.2937	-0.313911	1.24563	0.31831	-0.380209	-0.0940992	-0.667327	-0.448786	0.00561299	0.603428	-0.364442	-0.35381	0.0951109	1.7037	0.481637	0.295395	0.0725841	1.00865	-0.0282218	-0.631457	0.278786	-2.08268	-1.7928	-0.767488	0.653036	0.212575	0.774861	0.300726	-0.993607	-0.163848
AAGGATGCATAAGTTG-0	-0.114774	0.338596	-1.25073	0.340872	-0.0814973	0.907011	-0.924421	-0.356567	-1.25288	-0.22344	0.0645797	0.0355078	1.49217	0.531092	-1.52661	-0.353685	-0.850662	-0.917948	-0.0395512	-0.0288022	-0.0105163	0.770503	0.32617	-0.387558	0.953277	0.352707	-0.845422	0.652352	-0.225791	-0.0717204	0.834287	0.85407	0.464989	-0.734404	0.476926	-0.275937	-0.624635	-0.0757108	0.183599	-0.860736	0.730497	-0.208051	1.5416	0.587512
AAGGATGCATTAAGTG-0	1.21721	1.38146	-0.23715	-0.873432	0.444939	1.09102	-0.354786	0.970637	0.915665	-1.97203	0.115617	-0.922945	-0.965175	-1.13203	-0.588514	-2.14125	-1.00208	-1.10492	1.33643	1.15884	0.702907	-0.591478	-0.49575	3.08332	-0.406624	2.56392	-0.194501	1.27604	-0.676384	-1.93918	-1.11788	-0.705376	1.82738	-0.118578	-0.369076	-0.958675	-1.54893	0.269763	1.20843	-2.57964	-3.09305	0.657154	-0.630772	-1.07379
AAGGATGCATTAGTGA-0	0.102581	0.529154	0.592339	-0.604745	0.403787	-0.387976	0.0254817	-0.47492	-0.521623	-0.709745	1.19424	-0.584752	-0.109657	0.944932	-0.551892	1.00894	0.340494	-0.33668	-0.877316	-0.243945	-0.358527	-0.717511	-0.22331	-0.339743	0.652904	-1.29127	0.578675	-0.131403	1.64875	0.644584	-0.360283	1.16749	-0.607867	-0.533419	-0.245578	-0.153841	0.154151	-0.145361	0.813981	-0.390434	0.792087	0.780434	-1.21467	-0.125233
AAGGCAACACAGGCTA-0	0.692748	0.021128	-0.15034	-0.116155	0.428681	-1.18282	0.148584	0.0168375	0.369857	-0.801073	-0.0361279	-0.535596	0.443806	-0.680216	0.482253	-0.627922	0.233486	-0.537867	-0.43741	-0.232126	0.558087	-1.76038	0.802631	-0.543073	1.75169	0.370314	-0.432623	0.830332	0.648791	-0.00226127	-0.961013	-0.505535	-1.0792	0.18813	0.0858762	0.409437	0.114507	-1.47781	1.45254	-0.744033	0.615768	0.307884	1.6666	-1.35423
AAGGCCAAGGATTCGC-0	-0.0169157	-0.429966	0.167654	0.157386	0.754003	-0.888872	-0.00149571	1.30923	-0.39762	0.34348	-0.70465	0.195022	0.291011	0.811866	-0.227855	0.0392717	0.555774	0.0432166	-0.0147529	-0.0113619	0.213878	-0.538036	0.251453	0.996015	-0.437257	0.302339	-0.339982	-0.528835	0.0553375	0.766114	0.249736	-1.3055	0.940746	-0.247528	0.991339	-0.423346	0.452721	-0.932707	-0.49701	0.217742	-0.43836	-0.429193	0.0966235	0.0116304
AAGGCCAAGGTAAGTA-0	1.25421	0.95532	-2.42737	-2.79266	0.162634	0.337209	1.36807	0.632859	-0.67215	-1.86602	0.154574	-1.3256	-1.5896	-0.328175	0.23851	0.174096	0.241896	0.435697	1.31525	-0.768464	-0.399843	0.0288249	0.0596199	0.462468	-0.827085	0.255937	-0.166998	0.405488	-1.26475	2.49351	0.821771	-0.744457	1.00181	-0.547574	-0.188585	-1.41603	2.25537	0.659686	-0.708028	1.55441	-1.82386	0.16578	-0.189819	-0.549429
AAGGCCAAGTCATCCT-0	-0.277403	0.126174	0.610207	0.518178	0.228755	-1.23501	-1.16538	0.514494	-0.897306	0.311083	-1.79449	-0.196041	0.475407	0.493956	0.482967	0.033955	-0.119065	0.876777	-0.198656	0.229905	-1.28753	-0.392673	0.775183	-0.0744757	-0.541701	0.386997	1.66008	0.675666	0.450867	0.306891	-0.766332	-1.10391	-0.2957	-0.324964	0.0295296	0.0593267	-1.37076	-0.714751	-1.13977	-0.227337	0.570674	-0.00233484	0.922373	0.445468
AAGGCCCCAAGCTTAA-0	2.17684	-0.83418	1.15543	0.572101	0.243077	-3.91053	0.209605	-1.34308	0.612036	-0.195785	-1.43442	-0.537403	-0.992612	1.4055	0.437957	-2.81769	0.25773	0.46704	-0.959158	2.62486	2.5322	-0.974637	0.600518	-0.587031	2.76547	1.14262	1.82449	-0.122496	1.29868	-0.814221	-0.788719	0.110065	0.512866	2.16598	0.0623498	0.0439485	1.20016	-0.64806	1.12907	-0.488477	-2.09485	1.3559	0.976168	-1.53812
AAGGCCCCACTAACCC-0	-0.299818	-0.0292672	-0.13774	-1.66759	0.782442	1.83208	0.798383	1.5933	-0.422122	0.0134867	0.414933	-0.249733	-0.234698	-0.206583	-0.40549	-0.024589	0.668724	-0.971098	0.633618	-0.495604	-0.393416	-0.00977974	-0.315151	-0.030617	-0.659643	1.07521	-0.180314	-1.16498	-0.134561	-1.11084	-0.445228	0.62492	1.22173	-0.0248246	1.14564	-0.272111	0.210711	0.727589	-0.906316	-0.675702	-0.797547	-0.762595	0.407288	-0.862603
AAGGCCCCATAATCTC-0	1.25738	0.205697	-1.57104	0.921243	-0.243515	0.590044	-1.00799	-0.73707	1.24347	-2.11962	-0.207205	-1.08883	0.234195	0.237999	1.13044	-0.921686	0.764894	-1.89632	-0.297633	-2.98214	1.32312	2.79689	0.558543	3.27395	0.00078497	-1.18701	-1.23442	-0.0485043	1.12354	0.730038	-3.04075	-0.625398	0.0936125	0.0445098	-0.630806	-1.36934	-0.843724	-1.05201	1.13261	0.68303	-0.138271	1.60295	1.79347	-1.05368
AAGGCTAGTATGGGAC-0	-0.157773	-0.486665	0.873927	0.482347	-0.569877	-0.842895	-1.05148	0.729944	1.15505	-1.47917	-0.295464	0.0424309	-1.99317	1.92133	-0.259587	-1.63417	-0.749787	0.481372	1.27667	1.28368	0.792937	-0.30827	1.08228	0.80793	0.254435	-0.0606951	1.13659	1.14472	0.615116	-0.315929	-2.00185	-2.46925	0.239774	0.0878974	0.233549	1.0034	0.605202	0.120049	-0.919053	-0.67269	-1.24236	1.37411	0.600572	0.932011
AAGGCTAGTGGAAGTC-0	0.649752	0.374276	-1.54842	-0.954259	0.722995	-0.598143	-1.16674	-0.382345	-0.770756	-1.21816	0.540209	-0.903263	-0.029462	1.84734	0.856657	-0.325158	-1.26724	2.22078	1.19813	-0.133731	0.102284	0.560264	2.01522	0.228111	-1.11707	0.323326	-1.05036	0.877409	-1.64524	1.64759	1.36066	-1.63756	1.15088	1.74095	-1.87972	-0.920371	0.996271	0.58109	1.13318	1.14864	-0.0590921	0.427219	-0.536592	-0.662054
AAGGCTAGTTATAGCC-0	-0.731046	-0.0817133	-0.0635938	-0.652995	0.702412	-1.18483	-1.12581	1.22267	-0.215312	-0.0162914	-0.805587	-0.153816	-0.460078	0.652458	-1.68104	0.48583	0.52799	-0.527386	-0.434269	0.735583	-0.366233	0.748434	1.24495	0.270235	-0.266483	-1.39822	1.38338	0.737022	0.936386	-1.42914	-0.423591	0.131547	-0.672459	-0.208632	0.888081	0.730841	1.28772	0.994403	0.323416	-0.45934	-0.513963	-0.851926	-0.240006	-0.620754
AAGGCTAGTTCGGTGC-0	-0.726667	-0.771572	0.54281	-0.252132	1.61683	-0.368689	0.0367628	2.78867	-1.28169	0.801843	-0.752975	1.03174	-0.800703	1.24683	0.411554	-0.0559654	-0.438637	0.312823	-2.28793	-1.50639	0.5454	-1.39378	-1.00463	0.897615	4.3597	0.41778	-0.404083	0.33537	1.9712	-1.92168	-0.533457	1.26224	-0.272993	-0.571745	1.20405	0.312859	-1.63004	-1.91233	-0.742848	0.216074	-0.960249	0.565636	1.45611	-1.60168
AAGGGCCAGCCTGACG-0	-0.147164	0.612222	0.146219	-0.727057	2.1293	-1.34078	-0.276562	-0.614661	1.07791	0.663112	-0.189962	-0.18213	0.992939	2.00697	-0.203838	0.575146	-0.298211	-0.406372	-0.553619	-0.326982	-1.13051	0.687332	0.176035	-1.14019	0.425887	-0.423449	-0.27714	-1.2088	0.877525	-1.78228	-0.0572814	1.48159	-0.417426	-0.0682648	-1.83915	1.47068	0.558532	2.14406	-1.99481	0.864941	0.731408	-0.72243	0.628831	0.438213
AAGGGCCAGCGCATCG-0	1.29936	0.0371851	-1.50188	-0.163164	0.639178	0.646841	0.636287	-0.234431	0.652419	0.586439	-0.404596	0.0698844	0.395148	-0.715306	-0.170077	0.438289	-1.33137	-0.525572	0.751329	-0.963879	-0.387533	1.46371	0.398795	-2.15236	-0.0680253	0.0206642	-1.14904	0.770269	-1.66288	3.22733	1.39947	0.373502	-0.366696	-1.03466	-1.13638	-0.0841941	1.19897	1.05222	0.231859	1.46763	-0.192623	-0.319034	-0.648419	1.38523
AAGGGTTAGCGGTCAT-0	-1.00819	-0.654262	0.971552	-0.392153	-0.671435	-0.30268	0.165686	0.137238	0.862031	-1.39788	0.931292	-0.216165	-1.34903	0.112118	0.951482	0.522637	-1.11549	0.815297	-0.66578	-0.225605	-0.917697	1.65337	1.34392	0.179149	-0.516326	-2.45549	-0.776525	1.34518	0.209758	-0.654411	0.0263351	1.18673	-0.196556	0.146999	-1.9852	2.66517	1.12616	-0.560493	0.945041	1.24765	1.7011	-0.731906	-1.98266	-0.789795
AAGGTATGTTTGAGCT-0	0.563287	0.712642	0.531621	0.95361	-2.06709	0.5465	-0.562838	-1.16235	-0.816927	-1.08988	1.03217	0.336084	1.80605	0.780888	0.923607	0.595871	-0.27458	-1.12256	1.25116	0.252579	-0.673324	1.89244	0.823491	-0.0493726	-0.325926	0.182709	-0.187959	-0.388426	-2.26511	0.311595	1.60194	-1.24286	-1.89994	-1.77094	-2.16499	-2.54004	-0.705636	2.60552	0.726863	-0.92188	-0.112125	2.10045	-1.71543	1.47136
AAGGTCAGTCAAGGTA-0	1.68819	-1.42516	1.26718	0.968779	-0.620099	-0.66546	0.516774	-1.56362	-0.232995	-0.686317	-0.432737	-2.13628	1.19934	0.718053	-0.930518	1.06135	0.807234	1.9185	1.54421	-1.34436	0.817956	0.998108	-0.0338971	1.3528	0.223052	0.330328	-0.449243	-0.0551224	-1.60149	1.68849	-1.34609	0.565726	0.2649	-1.81265	-1.00061	0.796539	-3.33778	-0.228062	-3.1686	0.944809	0.273997	0.766372	-0.893551	0.619335
AAGGTCAGTTGAGTAG-0	-0.720427	-0.283741	0.992456	-0.668911	1.33866	-0.494371	-1.11819	-1.39549	-1.29157	-0.234651	0.829094	-0.398165	1.32126	1.26468	0.518179	0.584771	0.050872	-1.10686	-1.64415	-0.0192495	-0.596997	-0.256477	0.227888	0.0882477	0.662466	0.0878739	-0.739352	0.29128	1.3574	-0.632696	1.36587	-0.00831977	-0.400462	-0.237936	1.31093	-0.0879582	0.366028	-0.667157	-0.0727654	-0.863105	-0.748425	1.18346	0.127714	-0.932392
AAGGTTAAGTATGGTT-0	-0.287724	0.510515	0.647985	2.0753	0.245915	-0.818977	0.159655	0.308956	0.233938	-0.576168	-0.125936	0.069382	-0.0243434	-0.331238	-0.923604	-1.54337	0.603577	-0.022531	-0.586078	0.304556	1.59835	-0.250669	0.0377433	1.05798	-0.748747	-1.70018	-1.06227	-0.45493	0.230815	0.609835	-0.0475687	0.220513	1.04334	0.436268	0.405437	0.31784	0.772933	-0.754973	-0.291931	-0.58832	-1.7698	-0.311693	0.840873	-0.259342
AAGGTTGGTGAGGACT-0	0.393517	-0.357129	-0.272004	0.548995	0.450944	1.13593	0.395594	-0.32128	0.0303551	0.742355	0.404146	-0.0591051	1.42654	-0.474246	-0.0434429	0.218291	0.412471	-1.41025	0.383911	0.2989	-0.083474	1.13183	0.37372	-0.687561	-0.61251	0.316889	-0.137571	-0.641458	-0.932672	0.0414145	-0.0155983	0.0276925	-2.04325	-0.137444	0.0948425	0.189617	-0.238992	0.442535	0.863901	-1.02525	0.167771	-0.645936	0.579755	-0.621891
AAGGTTGGTGCAAGGT-0	0.230186	0.903865	-0.570136	0.674672	-1.57579	1.24424	-1.27054	0.0761164	-0.434534	-0.141631	-0.923016	-0.277854	-0.287077	1.05553	-0.204232	0.735495	0.201219	0.710749	0.346933	-0.277412	-0.450686	1.54453	0.304266	-0.0320112	0.732971	-1.96585	-0.085513	1.7179	-0.351893	1.57562	-1.25287	1.71309	-1.29259	0.373273	-1.58391	0.119936	-2.0501	-0.317361	2.22902	1.56628	2.43159	-2.24414	-0.111207	-0.370179
AAGGTTGGTTAGACCT-0	-0.161692	-0.0811327	0.16505	0.131779	0.512675	0.0793143	-1.35537	-1.15263	-1.2296	-0.0449765	0.983518	-0.767027	-0.47388	1.32415	-0.0278217	0.454902	-0.763343	-0.210236	-0.413146	0.421858	-0.598484	0.0876243	0.826771	0.188716	0.488927	0.20897	-0.744298	-0.833524	-0.442634	0.995569	1.25518	-0.54112	0.402839	0.148892	0.186596	0.633843	-1.21554	0.330905	-1.28149	-0.785657	-0.813311	0.641983	0.586199	1.42882
AAGTAACGTCAATTCA-0	-1.38652	-0.151748	-1.28959	2.5549	-0.471203	-1.58198	0.35291	-0.830255	2.73948	-0.0990751	-0.462901	-0.412068	1.32751	-0.719748	0.395576	-1.18131	0.755302	-1.30638	0.298383	0.66091	0.569564	0.654899	0.951687	0.520227	0.0847715	0.0137636	-0.714193	1.59636	1.30199	0.0993874	-1.06947	-0.0473694	0.878187	-1.57316	-0.0259496	-0.90547	0.20267	-0.462281	-0.758586	-1.81604	0.0883154	-1.66029	1.13533	0.756638
AAGTAAGTCGATGTGC-0	-1.5685	-1.45508	-1.34225	0.619091	-1.20401	0.775008	0.704895	-0.892921	1.73777	-0.470545	-0.726999	0.702548	-0.0915168	-0.214374	0.262159	0.704769	1.26231	0.941633	-0.6795	-1.85262	-0.474968	0.436251	0.893792	-2.36156	-0.930575	-1.16723	0.736151	0.0144532	0.321833	0.370477	0.980121	1.83307	-0.41608	1.04552	0.108325	0.859108	1.27576	1.23271	-1.19359	-0.20682	1.6308	-1.95614	-0.147488	0.689722
AAGTACCCAAACCTGG-0	0.118248	0.875075	0.876256	0.392787	0.799099	0.543243	-0.104327	0.461498	3.08793	0.39574	0.432113	0.366154	-0.383171	-0.942748	-1.81895	-0.375856	1.5577	-0.0867219	0.676162	-1.25013	0.0819924	1.12393	0.199431	-1.11857	-1.05097	-0.354673	-0.216269	1.01317	-0.793899	-0.489227	-0.79196	0.700335	-1.55026	-0.179872	-0.630119	0.0740435	0.656958	-0.355394	-1.02179	0.316559	1.36533	1.36441	0.0930169	-1.3354
AAGTATGAGCCTATCT-0	-1.45516	-1.66221	0.0519875	-0.811574	0.354648	0.217525	-1.57581	0.532584	0.0750988	-0.0678587	0.351561	-0.436535	-1.65816	0.433343	-0.122539	-0.497599	0.327843	0.797419	0.478609	0.718183	0.536078	0.787582	0.16063	0.141171	0.538815	1.2916	-0.808811	0.541555	-0.199598	0.989462	1.20129	-0.277055	0.964155	0.564665	2.41667	-0.809976	-2.21474	-0.334038	0.583825	-0.465542	-1.03308	0.303868	-0.247297	0.241788
AAGTATGAGTAATGAG-0	0.0949159	0.553636	-1.25695	-0.843136	-0.744334	0.632103	-0.370157	-1.62293	0.970078	-0.849502	-0.203419	-0.751713	1.19977	-0.723187	-0.322884	0.274573	-0.545112	0.989305	-2.30483	0.152743	0.0807786	2.97104	0.0936785	0.105066	0.0892934	0.99752	-1.24904	-1.15524	1.18343	-0.344518	1.11183	1.16238	0.0631386	-0.962562	-1.0048	0.300055	0.535913	-1.40741	-1.23971	-0.971039	1.59533	0.904885	0.0972563	1.19575
AAGTCACCAAGCTCAG-0	0.0926561	-0.440915	-0.756725	-2.47303	-2.12319	-0.209282	-1.00525	-0.753457	-1.09832	-0.719926	0.518789	1.26967	-0.634641	-0.478155	-0.192104	-0.809137	-0.0727656	0.0987343	2.80109	1.36322	0.349376	0.427858	-0.83504	-2.00697	-0.38724	1.59519	0.3516	-0.00140973	-1.16663	1.11459	0.778646	-2.21428	-0.696859	-0.252722	2.1262	1.32504	0.535302	0.835825	0.126864	0.911556	-0.777624	1.78761	-0.0762114	0.768916
AAGTCACCACTACCCG-0	-1.75621	-0.311128	-2.13676	0.0790277	-2.80991	0.945153	1.26428	0.391636	0.43879	-0.12476	-0.772042	0.247042	2.36616	-0.450086	-0.0619984	-0.595763	-0.310424	1.39503	0.959001	0.267219	-0.017378	0.954299	1.04612	0.357325	0.278947	-0.689364	0.35984	0.638112	-0.99531	-1.9976	-2.37666	0.063508	-1.05795	-1.10869	0.255945	3.3534	1.04729	-0.162301	1.95804	0.229031	2.37701	-0.470518	1.19601	-1.50188
AAGTCATTCACTTGGA-0	-0.0411541	0.39709	-1.4995	-2.81191	3.55367	0.628762	-0.485148	2.18388	-1.49675	2.11849	0.490686	0.61373	-0.140145	-0.493444	-1.88113	2.54736	-1.74581	-0.820908	-0.788201	-1.15745	-0.896509	0.9847	-1.79432	1.12092	-0.393627	1.70526	4.33194	0.711369	0.0569509	-3.08194	-2.13151	1.09921	-2.77694	-2.8593	-0.782478	1.75405	0.239477	1.87804	-1.33859	-0.312616	0.170187	1.44466	-1.31576	-0.516651
AAGTCCATCAATCGCA-0	-1.64275	-1.09681	0.90653	0.763165	-1.37323	0.10197	0.541066	-1.39628	-0.43839	1.19773	0.20951	-0.390613	2.16375	-0.518631	-0.106891	-2.39124	1.45803	1.26209	1.09065	-2.28575	3.30586	-2.12259	-1.3875	0.639459	2.33341	2.7191	-0.429181	-1.32392	1.25682	-2.03139	-1.2341	0.695577	0.73373	3.7049	-0.12729	0.369177	1.27984	-1.13846	0.281516	0.326214	-1.15124	-0.146384	2.10444	-1.75502
AAGTCGCTCACCTACT-0	-2.18997	1.23574	0.637692	-1.31314	-2.509	-1.20675	1.72	1.24814	1.78383	-1.29948	-1.42237	2.22644	-2.21785	0.69257	-1.77566	-2.17185	-0.0976191	0.223601	0.459566	-0.279188	2.62789	1.4114	1.34512	1.08607	0.470995	-0.191335	1.34622	0.479661	1.76205	-1.2412	-1.44504	0.436089	-0.409329	0.134783	-0.198386	0.723964	2.44305	-0.396369	-1.03602	2.35851	0.229832	-1.07356	-1.16512	-0.670084
AAGTGATGTAGCCTGC-0	1.83103	2.48905	0.339302	-0.00432662	1.82613	-0.721219	-1.90645	-0.656633	1.53302	-0.993585	0.448261	-1.01532	0.147581	1.13319	-1.23217	0.109847	-0.0462565	1.08147	-1.62975	0.349028	0.416086	-0.460334	-0.607303	-0.487834	0.774717	-0.46061	2.53222	2.00327	-0.337865	-0.695076	-1.50124	-0.802297	-0.728243	-0.836923	-2.54138	1.34224	-0.700404	1.75698	-0.14209	-0.541748	0.0024549	0.754364	-2.08476	1.21116
AAGTGATGTTTCCGAG-0	-0.314771	-0.599101	-0.684765	-1.02247	-0.62219	0.273291	1.18067	-0.66812	0.751847	-1.61792	0.867355	-0.784383	-0.36196	-0.461271	0.97431	0.678472	-1.16007	-0.116603	-0.377758	0.0482753	-0.0336503	1.57197	1.66147	-0.826997	0.279729	-0.0788991	-0.507072	0.799436	0.521869	0.687656	-0.919135	0.462983	-1.52813	-0.617313	0.0701302	1.61795	-0.3478	-0.36903	1.20594	-0.147269	0.798527	0.370909	-2.0045	1.81619
AAGTGATGTTTCCGTC-0	-1.37455	0.972757	-0.287176	0.891673	1.22383	-0.473898	1.40517	-0.117377	-0.669244	-0.159078	-0.324078	0.234864	0.58607	-0.520896	-0.31543	-0.569634	0.645718	-2.30458	-0.264998	0.443886	-0.334726	0.246417	-0.226051	1.08428	1.05618	0.438839	-1.41006	0.13287	1.86288	0.255985	-0.0923337	-0.842156	-0.820394	-0.680847	-0.0826284	0.157353	-0.884744	-0.977349	-1.05024	-0.415591	0.178277	-0.0207972	0.318649	-0.693781
AAGTGCCTCCCCAGCT-0	-0.877592	-1.65806	0.343797	-0.875949	0.0861091	1.02159	0.0166678	0.0824763	-0.924784	0.779849	0.0403722	-0.105428	-0.0759057	1.06202	0.835053	0.140173	-1.0451	-0.827101	0.0453016	-0.246752	-0.388368	0.0699205	-0.163367	-0.601804	0.299087	-0.0930656	-0.325128	-1.67979	1.13237	-1.06701	-0.273628	0.68356	-0.330175	0.0815396	0.779497	1.35159	0.417883	0.274274	1.01787	-0.737916	0.625	0.248547	-0.171921	0.541935
AAGTGCCTCCTGTAAG-0	-0.448931	-0.43434	-0.200352	-1.35353	0.412435	0.708824	-0.755165	0.268553	-0.499276	0.0417387	0.324031	-0.088888	-0.491184	0.464114	-0.314216	0.916147	-0.0517159	-0.381721	-0.304858	-0.398914	-0.0290826	-1.40736	-0.453223	0.0942992	0.663023	-0.20811	0.437086	-0.650141	0.897807	0.144231	0.0964218	1.0516	0.130354	-0.292297	0.204869	-0.0628759	0.348516	-0.0743287	0.76825	0.607412	0.530565	0.77633	-0.815217	-0.35824
AAGTGGGTCCCCAATT-0	-1.2883	1.13027	-0.840658	1.31481	0.257379	1.49252	-2.19715	-0.509791	-0.317691	-0.489696	0.48806	2.04801	1.04654	1.59548	-2.20359	-1.50977	-0.821766	0.0202362	1.21818	0.101777	-0.924412	0.118443	0.790728	0.841169	-0.796092	-0.32147	-0.786034	0.161719	-0.108462	-0.4177	-0.201881	-0.4318	0.134182	0.74845	-1.01297	0.151216	0.0196912	1.10489	2.07635	0.564282	2.01982	0.414766	0.158649	-2.85897
AAGTGGGTCCGTTACT-0	-0.131062	0.907649	-0.41222	0.0420495	1.02811	-1.04719	-0.957402	-1.06321	-0.404371	-0.973581	0.756124	-0.837037	0.1558	0.456308	0.241938	0.669125	0.0569882	0.516698	-1.40203	0.620306	-0.991666	0.769454	0.857963	0.476705	0.030362	-0.437077	-0.233332	0.771425	1.87677	0.818086	0.188831	-0.552297	-0.86483	-0.674717	-0.335102	-0.470836	-0.418933	-0.434964	0.389232	-0.170395	0.957244	1.30918	-1.11339	-0.204528
AAGTGGGTCGAACGAG-0	-0.35326	0.0200772	-0.228348	0.511195	-1.15602	-1.35079	-0.422573	-0.480592	1.30629	-1.01222	0.0784314	-0.150428	-0.609768	-0.568859	-0.666537	-0.590735	0.897948	0.193074	0.894056	0.617377	0.0151029	1.49027	0.0126099	-1.40383	-0.0148507	0.505044	1.10043	-0.535564	-0.418083	0.579479	0.241119	-0.475976	1.14591	-0.122256	1.12169	-0.44002	-0.87571	0.992384	-0.903159	-0.350454	-0.320964	-1.47828	1.18869	-0.263477
AAGTGGGTCTGGTCCC-0	0.798271	-2.10535	-1.27363	-0.196049	0.273058	1.6088	-2.26435	1.49301	-0.832117	0.88093	0.0479208	1.20055	-0.311229	1.28255	2.0338	-1.25754	-1.30598	-1.02691	-1.21202	1.44449	-1.94531	-1.94222	-0.180546	1.15522	-0.295668	-0.703957	-1.06157	2.68787	1.08003	-0.540049	1.37554	0.343581	-0.992506	1.59629	-0.0854298	2.37906	1.301	0.115007	2.5821	-2.47581	-1.02457	-2.74767	-0.271856	-0.548886
AAGTGTCCACCTATCA-0	-1.42278	-0.601612	-1.14523	-1.69901	0.0897726	0.755631	-1.14207	-1.30951	0.465371	0.353068	1.40928	-2.12286	1.07722	-1.68193	2.06377	3.08457	0.0191411	-0.102585	-0.500555	-0.865547	-0.233434	0.445686	-2.36934	0.580561	0.17675	0.705938	-0.74868	0.738926	0.726908	1.47747	0.794632	-0.00938715	-0.556987	-1.29499	-0.0230396	0.524667	-0.705058	0.588855	-1.15889	3.30831	-0.577291	1.51878	-0.953771	0.627924
AAGTGTCCATTGCCGT-0	-0.658574	-0.380766	-0.00281035	0.346251	-0.730805	1.34565	1.58226	-0.181016	0.930185	1.60968	-1.00339	1.42194	0.923301	-0.162234	-0.45157	0.288334	0.0289719	-1.21493	0.739807	0.0266453	-0.643475	-0.138361	-0.951862	0.343716	0.233988	0.324677	-1.54436	-0.139346	-1.2687	-1.52979	-0.255146	0.530706	-0.844897	-0.00605276	-0.24869	0.695958	0.625498	-0.210627	1.62967	-1.00387	-1.12087	-0.533957	-0.0762603	-0.533792
AAGTTGAAGTAGCCGT-0	1.03501	-1.5905	-1.46348	-1.76643	0.981551	0.527006	0.428705	0.635533	-0.648207	-0.212579	0.354976	0.178238	-0.10063	-1.02124	1.00356	1.25289	-0.388201	1.74171	-0.699612	1.76323	0.273495	0.489735	0.121738	-0.048547	0.201077	1.56168	0.134314	-0.729583	-0.694179	0.214892	1.08086	-0.835943	-0.18869	0.279378	1.48908	0.28896	0.494484	0.637451	-1.77567	-0.284904	-0.701597	-1.5167	0.036396	0.357226
AAGTTGGGTTTAGTCA-0	-0.465688	0.620619	0.216732	-0.917765	1.46952	-1.10447	-0.748917	0.560282	-0.447224	0.348903	0.476662	-0.433571	-0.733549	1.13977	-0.40145	0.175969	0.249864	-0.231974	-0.235658	0.561735	-0.0376738	0.920936	-0.405033	-0.452274	0.526395	0.154495	-0.197178	0.26516	1.67414	1.83017	0.40471	0.288563	-0.553089	-0.31311	0.025942	-1.86831	1.1565	-0.215257	0.876306	-0.899887	0.015034	-0.374511	-0.436006	0.365205
AAGTTGGGTTTGCATA-0	-0.0755078	-0.500841	0.915697	2.2517	-2.29424	-1.03214	0.335654	1.58127	-0.316044	1.07802	0.689372	-0.195197	1.49396	0.0850326	0.0379122	0.646572	-0.666447	0.891166	0.771872	0.554593	-0.756246	0.795652	-0.426477	0.777737	-0.74544	-0.168896	0.330757	-0.688521	-1.53354	-0.838342	0.348403	-0.540471	0.308577	-1.19949	-0.140415	-0.463017	0.302537	-1.85206	0.0685978	-0.0648839	0.297483	0.64027	-0.510175	0.881549
AAGTTTGCAAGGTTAC-0	-0.0399111	-2.11102	-0.451637	-0.630476	1.25949	0.393873	-1.78947	0.877128	0.940154	-1.40807	-0.130309	0.0885124	-1.21722	1.58053	0.238846	-0.525619	-0.0861082	-0.483531	0.482148	-0.0444583	1.55864	1.19371	0.741755	0.804721	-0.496072	-0.833998	-0.168086	1.41813	0.416699	-0.717746	-1.62351	-1.21365	-0.554743	-0.2883	2.19944	-2.44814	0.931306	-1.01913	-1.39005	-1.16716	-0.0116779	-0.55559	1.22424	1.4592
AAGTTTGCAATCTGCC-0	-1.72096	0.520397	-0.223101	0.907519	-0.1782	0.176607	-0.373602	-1.06188	-1.02474	-0.0229634	-0.360028	0.0841461	1.72225	-0.449843	0.715374	0.0175721	0.128694	0.445992	0.804543	-1.32272	-0.230359	1.27278	-1.54395	1.2286	0.49675	0.300762	0.197843	-0.597977	1.2192	-0.459831	-0.182357	-2.20551	1.04267	0.274506	-0.443484	-1.13644	-0.528026	-0.107375	-1.05836	1.9787	-1.42989	0.400572	1.30634	0.528157
AATACGAAGCTACCGG-0	-1.66401	1.37036	-0.0307298	-1.65624	-1.567	-0.0977474	-2.32645	-1.71525	-0.541271	-1.425	0.661767	-0.825841	-0.278835	0.637948	-0.678967	0.424329	-0.408492	0.320488	0.264339	-0.130208	-0.0192311	0.0136459	-0.669364	0.84444	-0.368492	-0.767918	0.542876	0.772058	0.770193	-0.49463	-0.284373	0.166797	2.05437	-0.132226	-0.514544	0.739116	-0.614932	-1.48482	0.579311	0.0766762	1.13083	1.87715	0.480154	0.114859
AATACGAAGGCGCATT-0	0.173954	-0.201027	1.04251	-0.138621	0.496297	-0.241412	0.135207	0.584007	-1.25232	0.657971	0.272287	0.0869486	-1.5336	0.631459	0.673706	-0.884931	-0.147572	-0.493961	-1.71759	0.575576	0.298018	-0.888827	0.665902	1.04573	1.31342	0.863918	-0.196147	-0.391201	1.22544	-0.982566	0.344393	-0.939775	-0.60803	0.850742	-0.834497	0.735506	-0.361806	-0.314189	0.651588	0.235347	-0.34182	-0.175371	0.721487	-0.707844
AATACGAAGTCAGGGA-0	0.756954	1.15424	-1.01709	0.12735	0.00641651	0.169872	-0.414375	0.941109	-1.70281	0.159812	0.402991	0.627886	-0.668776	-0.10179	0.743114	0.459172	-0.47353	0.532368	-1.37538	0.589801	-0.448506	0.76347	0.153671	1.44708	-0.360805	-0.629664	0.903954	0.690554	0.2434	-0.365349	-1.06639	-0.0150402	-1.29474	-0.221344	-1.97916	-0.826738	0.939435	-1.98738	1.75304	0.0281192	0.343619	-0.980624	2.27149	1.2147
AATACGCCACCTTGAC-0	1.04796	0.65447	0.0626214	0.0463494	0.364242	0.578675	-0.753653	-0.211732	-1.12907	-0.4018	0.783818	-0.487689	0.892237	0.80341	-1.32504	-0.148942	0.0833628	0.409802	0.21766	-0.522138	-0.153199	-0.292795	-0.272546	0.361516	-1.37418	-1.68267	1.57898	1.67227	-0.327724	-0.521106	-0.109862	1.2472	1.00322	0.174308	-0.866874	-0.431158	-0.230723	-0.392403	0.503977	-0.749307	0.560138	0.620382	0.872023	-0.66223
AATACGCCATCAAGCG-0	-0.767573	0.361515	-0.138601	-0.0803302	-0.579131	-0.256374	-0.264538	-1.54552	-1.28318	0.555408	0.425453	-0.387463	0.516486	0.751546	0.259898	-0.0566781	1.11371	-0.317575	0.813327	-0.496826	-0.360783	0.851743	-0.972499	0.0846887	0.0961056	0.518005	-0.248431	-0.591683	0.966413	0.842731	-0.323561	-0.00698511	0.209109	-0.127581	0.333369	-0.782325	-1.71565	0.0377163	-0.235667	-0.627596	0.782683	-0.0421501	0.147235	-0.0642103
AATACGGGTTCACCTC-0	-0.943477	0.365894	0.326713	-0.109171	-1.25973	0.971303	1.0421	-0.30967	0.839029	-0.0360705	-0.58943	1.54672	-0.0686876	-0.270976	0.431198	0.469707	0.844595	0.196454	-0.378052	0.00826399	-1.07892	-0.811313	-0.945505	0.283866	-0.939561	0.0155935	0.0946848	-1.17456	0.867473	-0.274383	-0.271423	0.414143	0.144193	-0.10014	-0.664689	0.0326735	-0.872914	-0.360843	0.175615	0.643831	-0.223933	0.0207615	0.105019	1.11894
AATACGTTCTAAGCTG-0	0.132022	-1.20979	0.886764	-0.581984	-0.994633	0.445463	-0.449942	1.72623	0.854332	0.722309	0.357981	1.10564	-1.75344	0.905169	-0.693847	-0.907692	1.23962	-0.318284	1.0628	-0.652131	0.630609	1.29445	-1.72749	-1.49301	-0.144189	-1.53558	0.795874	1.44794	1.52717	-1.20506	-2.36449	1.20656	-0.821773	-0.504871	0.568309	0.29435	0.979058	-1.20546	1.0665	-0.0765839	1.07822	1.32635	-0.695551	0.421546
AATATGCTCACGTAGC-0	-0.239434	2.52731	-0.789069	-0.0833592	-0.0216458	1.89978	-1.21773	1.51462	-0.255727	-0.0380643	-0.36583	-0.52352	1.02873	-2.04742	0.568857	1.99706	0.404078	-1.22149	-1.20033	-0.662253	-1.23685	0.455361	-1.38408	-0.803799	-0.445374	-1.65738	-0.173658	-0.0507143	-0.471265	0.572544	1.21913	2.26423	0.082422	-0.0627779	-0.404172	-0.509628	-1.55718	-1.34513	0.836706	-0.552155	0.493287	0.251971	-0.264579	-1.89082
AATATGCTCCCGCACT-0	0.0677015	-0.309952	0.181666	-0.751475	0.692911	-0.178615	-0.356163	0.0624697	-1.01047	-0.0705687	0.226138	0.422814	-0.343993	1.08384	0.774623	0.390981	-1.11644	-0.875349	-0.872966	-1.24209	-0.127925	-0.545431	-0.216357	0.985708	1.62961	0.251911	-0.740286	-0.728451	0.469731	-0.0509932	0.529782	0.144997	0.729674	-0.490889	-0.0582054	-0.717429	0.705481	0.246761	-0.243429	0.929838	-0.337671	0.481042	0.14534	0.31434
AATATGCTCGAATCTG-0	-0.686336	1.62768	-1.69903	0.745523	-0.187216	-0.262605	1.66513	0.815723	0.39929	-0.887378	-0.951548	-0.201553	0.0102275	0.571049	-0.526005	-0.952908	0.793862	0.653939	-0.902904	0.918962	-0.186383	1.80529	1.92135	0.913051	0.304848	-0.615843	1.19187	-0.337898	-0.0907251	-1.42023	-1.88838	0.333177	-0.446355	-0.818005	-2.58421	1.20955	-2.55962	-0.0443445	-0.104493	0.1815	0.147652	0.245954	0.1851	-0.429332
AATATGCTCGCGCAAT-0	1.14798	0.21846	-1.54095	-0.527957	1.12522	-0.074202	-0.379605	0.206816	0.67686	0.255084	-0.409485	0.113191	0.173558	-0.366117	1.7697	-1.28533	0.638856	-0.157595	-0.417308	0.188421	-0.469163	0.0150165	-0.4661	-0.519762	1.27781	0.949447	-0.896737	1.59442	1.28309	0.599706	-1.52693	-0.910823	-0.310868	-1.30589	1.2151	0.193138	0.876461	0.385601	-0.429524	3.66857	-0.201614	-2.61757	2.00109	-0.379517
AATATGCTCGTGATTG-0	0.298879	-0.0438705	0.364041	0.0791323	0.575934	-0.0196914	-1.1553	-0.597319	-0.0732151	-0.129299	0.553693	-0.305117	-1.12619	0.226861	-0.344036	0.0562949	1.15893	0.880708	-0.0487664	0.421267	0.125676	-0.32244	0.125894	0.614949	0.284132	0.726986	-1.29125	0.639262	-0.610556	0.642719	0.425183	-0.464617	0.300147	-0.849234	0.0621379	-0.272321	-1.41746	0.704493	-0.381747	0.634721	-0.595003	-0.579037	-0.172079	-0.71828
AATATGGAGCCAGACT-0	-1.03041	-0.244786	-0.259668	0.202562	0.595951	-0.0987019	-0.998683	-0.00789883	-0.205666	-1.7739	0.249225	0.381144	-0.864981	0.526848	-0.790254	-0.758016	-0.514813	-0.650689	1.08476	0.490112	-1.1019	-0.353124	1.25911	0.584768	-0.130689	-0.214285	-1.53437	0.27295	-0.969469	1.2513	1.29122	-1.10234	0.0194299	0.0296148	-0.172897	-0.194426	-0.0413107	0.988665	1.62244	0.741826	-0.823784	0.520221	-0.55071	0.196601
AATCACTAGCCTGTCC-0	0.227438	0.0370022	-1.13347	2.17989	0.670524	0.377628	0.747379	0.112111	-1.09786	0.724286	0.531825	0.0414024	-0.345283	0.00514932	0.0125123	-0.427276	1.19005	-0.0467908	0.317295	-0.0305931	0.32371	-1.48255	-1.41567	-0.535936	-0.00244559	-1.37607	-0.411888	0.266276	0.403193	-0.894746	0.280553	-0.790774	-0.440933	-0.246885	0.69905	0.569576	0.00939971	0.680001	0.240714	-0.247144	-0.548516	-0.847738	-0.237689	-1.77375
AATCACTAGGGCCATT-0	0.402666	-0.526899	0.55889	0.184497	-0.064858	0.103016	0.300873	0.223263	-0.0440918	-0.961194	-0.139401	0.890078	0.236724	0.668771	0.0474932	-0.0550696	-0.336972	-0.0514518	0.194497	0.156538	-0.343021	0.0693548	-0.147766	0.357213	-0.852949	-0.0245346	-0.648426	-0.623545	-0.217147	-0.0587361	0.330088	-0.151437	-0.284293	-0.99135	0.195296	0.470117	-0.285598	0.398416	-0.576448	-0.123549	0.34468	-1.79847	-0.283331	0.764413
AATCACTAGTGGCTTA-0	-0.142166	-0.241672	0.432084	-0.0746327	0.887202	-0.410644	-0.04861	0.966699	-0.052636	0.309506	0.339638	-0.203305	-1.23274	1.59917	-0.0321961	-0.429403	0.611171	1.36407	-0.609078	-0.624517	0.609434	-0.176128	1.13054	0.498767	-0.192157	-1.00228	-0.564223	-0.541934	1.57476	-0.101348	-1.10973	0.872794	-0.882752	0.905698	-0.791424	0.75565	-0.313877	0.473895	-0.164628	0.198618	1.2079	-0.749969	-0.698516	0.198927
AATCAGCCAAAGGACA-0	-1.51516	0.782897	2.32105	0.701575	-0.250687	-1.20518	0.482485	0.387108	0.271852	0.207729	-3.32725	0.944604	-0.00945945	1.58342	-0.485229	-0.82848	0.493194	0.626126	0.236389	1.22367	1.63888	-0.0251541	2.07797	-0.349976	0.146387	0.20057	3.25274	-0.559197	0.889906	-1.05836	-0.152722	-0.242519	-0.183994	2.93087	-1.65524	-0.176655	0.57271	-0.782791	0.802428	-1.35169	-1.43059	2.17802	0.362087	-1.40431
AATCAGCCAGCTAGAT-0	-0.20782	1.25848	1.12058	0.105475	2.51074	0.0671637	-0.546721	-0.468696	0.147594	2.35569	-1.04097	1.21012	0.138415	-1.16326	0.08263	1.00928	-0.695567	-0.854199	-1.19601	1.91195	0.228144	-1.40025	-1.586	-1.50854	-0.0719865	0.844093	-0.947251	-1.26193	-0.621729	-0.610589	2.91246	1.56509	1.56612	-0.731838	2.75353	-1.74186	-1.31557	0.69485	-0.336245	-1.80907	-2.68858	-0.231988	0.364509	-0.741455
AATCCAACATAGAGTC-0	-1.33995	-1.76505	-0.0629117	-0.381805	0.752312	0.654077	0.511682	-1.07317	0.684723	0.0331436	0.504193	-1.84031	0.60851	-1.96769	0.706613	0.379931	-0.124611	1.27162	0.490309	-1.59923	-0.658786	0.621584	-1.13056	-1.07442	0.150127	-0.251129	-1.95795	0.832178	-0.048568	1.16047	1.13865	1.81305	-0.165154	-1.26376	0.883416	-0.166163	-0.612767	-0.120785	1.61585	0.738355	0.892136	-1.39506	-0.160032	0.468431
AATCCATAGGGTCTCG-0	1.68979	-1.68688	0.398286	0.995193	1.89396	0.977834	0.472289	0.262449	1.02346	1.17152	-0.495816	0.184407	-0.128206	-0.0436944	-0.151934	-1.06323	1.75867	0.241173	0.314888	0.630658	1.00935	-1.18078	-0.507788	-1.92424	-0.000594564	1.33381	0.20477	-0.659524	-1.02573	-1.46854	0.315955	-0.593664	-0.637909	-1.02678	2.13191	-1.41956	0.504857	1.88882	-0.355262	-0.914934	-0.719554	-0.391549	-0.610921	-1.15843
AATCCCAAGCGGTTCG-0	0.859233	0.0774981	-0.0205374	0.444408	-0.525429	-0.258382	0.641022	0.237875	-0.694815	0.0758727	-0.808844	0.0836652	-0.063599	0.213451	1.55139	-0.985942	-0.446976	0.137796	0.125578	0.451948	1.13926	-0.0512173	0.236795	0.135209	-0.727083	-1.31516	-0.842311	0.772008	0.284668	0.389943	0.3712	-0.272695	0.421654	0.32326	0.0511775	0.270088	1.69757	-0.0887475	0.0657188	0.689404	-0.704098	-0.527132	0.110931	-0.154495
AATCGCATCGAAGCTC-0	0.316851	-1.44079	-2.1645	1.35103	0.176607	-0.378793	0.0755372	-0.180097	0.145331	3.15715	-1.47053	-0.885973	2.29048	-1.69299	-0.497066	1.97924	0.621966	1.31884	0.684705	-1.00554	-0.780487	-0.570906	-2.04867	-2.07084	-0.342709	-1.05558	-0.291207	-1.58237	-1.17875	2.37382	1.62565	1.8287	-0.187947	-2.12903	0.453507	0.672537	-2.81983	1.40378	-0.138311	0.158588	-0.151243	-0.773038	-0.558841	1.13099
AATCGGCTCTAGCCAA-0	0.758867	-0.580837	1.44964	-0.352842	-1.48757	0.112018	1.97273	1.72186	1.51266	-1.80551	-0.134247	1.20734	0.204191	0.00851769	-1.24969	-0.392617	-0.194746	0.770179	1.92015	0.400189	-0.0950974	1.52124	-0.296641	0.376771	-2.20319	0.195383	-1.10217	1.99287	-1.67555	-0.100263	0.769327	-0.617896	-0.0251557	1.22777	0.0962179	0.171052	2.94556	-1.3515	0.247176	1.27542	-1.84547	-1.06489	-0.883998	0.55949
AATCGTTAGGAGTCAG-0	2.07319	-1.52357	-0.817867	-0.122565	2.19852	-0.600223	-0.062677	0.806661	-1.45142	0.902714	0.731601	-2.01337	0.77141	0.385377	-1.80088	-2.64967	0.920474	0.683011	0.581785	1.03469	-0.873086	0.758767	1.5698	-2.05934	0.069264	2.03596	0.91643	2.31731	0.288873	1.26802	0.448378	-0.728206	0.361915	0.531848	2.12559	-2.20965	1.17277	0.522778	0.421833	-0.185197	-0.374976	-1.69641	0.688926	-0.702514
AATCGTTAGGATCTAT-0	-0.488891	-1.64075	0.0421733	0.226362	-0.400865	0.687471	-1.2643	-0.791291	1.79917	-0.849206	0.809937	-1.03396	-1.47556	0.393721	-0.226785	-0.779954	0.515999	0.765187	0.889838	-0.21197	0.0186973	0.186101	0.276645	-0.872018	-0.404192	-0.340919	-0.0711336	0.198559	-0.0449339	0.625076	-0.886573	0.485206	1.18988	0.518457	0.393283	0.785714	-0.504564	0.224091	-0.966864	-0.834786	0.783758	-1.73048	0.584829	1.37185
AATCGTTAGTTACGTG-0	-0.640677	0.539842	-0.740069	-0.362173	1.23333	-0.136981	0.702996	0.634009	-0.119359	-0.675233	0.285829	-0.949993	-0.693419	0.44918	-0.336842	0.649168	-0.345992	-0.580365	-1.00456	-1.03104	0.0871468	-0.99252	0.0588961	1.08568	1.45917	-0.371235	0.0138588	-0.47494	0.64054	0.0380257	0.123391	0.441551	-0.878852	-0.494083	-0.37666	0.300643	-0.0712914	-1.93033	0.533966	0.730975	-0.202607	1.09275	-0.318631	-0.98659
AATCTAGCAAACCGTG-0	0.0180146	-0.481585	-0.100763	-0.221035	1.06772	1.32181	0.501921	0.574473	-0.486753	-0.547628	0.625713	-0.374398	-0.115406	-1.25765	-1.29338	-0.0134832	0.0520187	0.484111	-0.401041	0.152815	0.394544	0.592359	-0.478564	0.63481	0.331386	0.527022	0.362507	-0.157239	0.454419	-1.34468	-1.83024	-0.426748	-0.59211	0.057889	1.24975	-0.325994	1.48897	-0.750037	-0.686995	-0.492127	1.33584	0.0785332	-1.37794	-0.0428254
AATCTAGCATCGTACC-0	-0.422999	-0.446145	-0.160601	0.904681	1.26252	0.94866	-0.75243	1.14418	0.634137	1.5949	0.300036	0.286108	0.180844	-0.104201	-1.3603	0.592373	0.93595	-0.10195	0.568891	-0.0415842	-0.836517	-0.131638	-0.82544	0.386485	-1.1785	0.740723	0.260445	-0.717861	-0.851227	0.770076	0.245513	0.0136075	-0.767005	-0.489771	0.152377	-0.567812	-2.57907	0.639588	-0.126051	-0.376517	0.293978	0.127137	-1.14033	1.03189
AATCTCCTCGACATTG-0	0.532789	-2.79192	0.068539	2.11308	-1.5914	-0.840642	-0.986405	-1.21027	1.70072	-0.149397	-0.33052	0.366531	-0.355445	-0.396302	3.14542	-1.18867	0.469032	-0.132062	-0.781755	0.104739	1.38646	-0.885949	0.379682	-0.418579	0.185718	-0.16789	-2.79401	0.626241	-0.78304	0.580401	0.697246	-0.689555	1.26963	1.83238	0.801669	0.845831	1.33712	0.0613781	-0.0966242	-1.90724	-1.56423	-1.8017	1.55253	-0.547323
AATCTGGTCGCGAACT-0	-0.0407083	-0.249652	0.331378	0.216094	-0.540491	0.360956	0.285295	-0.937059	1.59398	-1.92263	0.48063	0.364549	1.53642	-0.391839	0.56899	0.213153	-0.153682	0.0612072	-0.765147	-0.222525	-0.905414	0.908844	0.83671	-0.442633	-0.256814	0.377554	-1.10014	-1.21824	-0.0539247	-0.559533	0.630723	-0.40975	-1.14468	0.0596659	0.136324	0.549679	0.783509	-0.0617257	0.0629125	-0.348716	0.210232	0.468583	-0.665907	-0.110343
AATGAACGTAACCGGG-0	0.117429	-0.0421834	1.09033	0.102536	0.941451	-1.62089	0.930016	1.22516	0.285215	-0.755627	-0.489518	0.443284	-0.763864	0.206463	-0.61148	-1.60058	0.831977	1.68357	-0.1428	0.344502	2.95718	-1.82548	0.240188	0.333989	-0.288649	0.355466	0.87724	-0.608792	0.610307	-0.0414438	0.473827	-0.431323	1.44588	2.6717	1.33895	-1.33723	1.24471	-1.00395	-0.927251	0.535714	-1.53391	-0.578456	0.174819	-0.452427
AATGAACGTAGTAACG-0	-0.805413	-0.936582	1.13645	0.558854	-0.654261	-2.5182	0.110243	-1.11223	1.54105	-1.25835	0.308052	-0.70313	1.69703	1.22982	0.455743	-0.313708	2.01294	-1.26596	-0.86965	1.81146	-0.490464	0.105467	0.975024	-0.202987	-0.528626	0.876609	-0.656033	-0.410989	0.359664	-0.996748	0.268257	-0.482247	-0.389009	-0.253335	1.18819	-0.299642	-0.353908	0.101538	0.273025	-1.29975	0.09259	-0.49621	1.84152	-1.5318
AATGAACGTAGTGACA-0	0.947072	1.05438	1.12596	1.47054	-0.00218025	-0.834345	0.608834	-0.0274157	0.82804	-0.736451	-0.139567	-1.50625	1.05833	-0.812063	0.0688795	-0.105626	1.46508	-0.143802	-0.493818	0.562221	-0.580993	-0.272045	0.789507	1.43122	0.8269	-0.213455	-0.810572	1.02046	0.446871	-0.00403999	-0.881991	-1.24781	-0.345599	0.461972	-0.14157	-1.48321	0.874568	-0.513187	-2.20825	-0.356069	-0.819606	-0.103533	0.0518978	1.0799
AATGACAAGCAACCGT-0	0.392843	0.979186	0.253223	1.05436	0.944564	-0.602824	-0.98986	-0.783178	1.93182	0.114875	0.960983	-0.941804	-0.376693	-0.62205	-1.01179	0.22965	1.12814	0.385509	-0.277351	1.36254	-0.378454	1.12797	-0.546387	0.147655	-0.172211	-0.415722	-0.0358052	0.0979194	-0.205139	-0.0652718	-0.373024	-0.00826284	0.357948	-0.512492	0.257042	-1.28602	-0.940518	0.243112	-0.79583	-1.19206	-0.0436382	-0.765124	0.901509	-0.186652
AATGACAAGGCGTCTG-0	1.10254	0.703524	-1.40958	0.295233	-0.226496	-1.62211	-0.994249	-1.19059	0.252007	-2.33192	0.592166	-1.81884	0.488952	1.45524	-0.398558	-1.19984	-1.04553	0.783806	0.236937	1.08776	-0.613362	0.272989	2.03561	0.702204	-0.280026	0.359598	1.50704	0.767845	-1.53023	0.591226	-0.0261107	-0.142505	1.13015	2.05471	0.273703	-0.85951	-1.47455	0.342334	0.649258	-0.754994	-1.56698	1.50685	0.492778	0.0461861
AATGACAAGTGAGCAG-0	0.62264	-0.267457	1.45512	-0.486603	-0.783695	-0.034282	-0.614658	0.252437	-0.395987	-0.4564	0.0739037	-0.680913	-0.824779	1.13464	1.04557	-0.0182292	-1.91554	-1.57527	0.631473	1.30612	-0.533335	1.31383	0.810413	1.38109	0.366762	0.828087	-1.1979	0.682218	-0.566491	0.887468	-0.404288	-1.95835	1.29192	0.174435	0.754171	-0.499283	-0.00938473	-1.74742	-0.957617	-2.14425	-0.0905724	1.84178	-0.546706	2.26569
AATGACCCAGGCTATG-0	-0.54517	0.340103	0.0644531	-0.929887	-1.19182	-0.153603	-0.519823	-0.949359	0.222302	-1.73857	0.569916	-0.716042	-0.150606	-0.210833	-0.549124	0.977767	-0.195504	1.36293	1.49821	0.950228	0.199755	0.645305	0.381348	0.146807	0.773779	0.148737	0.159921	-0.384976	-1.08439	-0.151676	0.498405	-0.173722	0.841316	-0.470528	-0.4393	-0.174958	0.219396	1.07543	0.509274	0.421913	0.799079	-0.864417	-2.00735	-0.672535
AATGACTTCAGTTCGA-0	-1.9104	0.173032	0.19823	0.198639	-0.881662	-0.225549	-0.20735	0.162881	-0.0692272	-0.516779	-0.273798	1.40765	0.109621	-0.195038	1.08161	0.849689	-1.00925	-0.183405	-0.38919	-0.0339027	-0.970404	0.379897	-0.390039	0.66069	-0.149544	-0.880112	0.00689064	-0.454012	0.499086	-0.134516	0.209467	-0.44557	0.152769	-0.213892	0.370213	0.399262	0.698398	-0.53979	-0.538889	-0.393124	0.158862	0.118476	-0.305159	0.988684
AATGAGGCACAAGCCA-0	1.36895	-0.173501	0.554213	0.213963	2.04431	-0.455547	1.43017	0.434419	-0.759651	0.404126	0.479789	-0.473572	0.624727	0.29885	-0.230175	0.943648	-0.796293	0.472163	-0.278953	-0.037478	0.528822	-0.673517	0.393851	-0.234413	-2.75075	-0.0754606	-0.0303881	-2.99203	-1.3488	-0.282501	0.611117	-0.100391	0.596932	-0.163356	0.0777463	-0.0627282	0.854575	-0.177549	-0.794736	0.0633006	-0.166533	0.116291	0.656885	-0.340638
AATGAGGCACCAACTC-0	0.900978	-0.705475	0.213387	-2.72583	0.0262244	1.37351	-0.413497	0.945594	-2.27348	0.505896	1.46543	0.736811	-0.110571	0.235428	1.82872	1.35181	-0.71655	-0.428695	0.183483	-0.139573	-0.830689	-0.996268	-1.12319	-0.345142	-0.0199598	-0.382218	0.688495	0.64627	-1.30044	2.34794	0.0296415	-0.300905	0.132009	0.348881	-0.0534842	0.376519	1.48641	0.968377	-0.0368983	-0.507235	-0.67664	0.56931	-0.898894	1.12013
AATGATGAGCGCCTTC-0	-0.718445	0.15243	-0.280176	1.4798	0.594312	-0.696835	-0.593749	0.97389	-0.751361	-0.401784	1.51594	-0.393114	-2.11282	-0.653617	-0.447063	0.214118	-0.775526	-1.27014	-1.6321	0.255639	0.719659	-0.0595695	0.131505	2.18029	1.20109	-1.47864	0.167579	0.136829	1.36801	-0.784151	0.60852	0.159905	0.567315	0.570315	-0.21069	-0.292594	0.515422	0.474704	1.50526	1.1235	-1.81084	0.946716	0.212375	-1.64277
AATGATGAGGTATGAA-0	-0.00663747	1.22961	0.405844	0.342385	-1.92111	-0.440278	-0.0680702	-0.747813	-0.118536	-0.735769	0.211026	-0.276271	0.0305524	0.0870385	1.30559	0.25682	-0.537311	-0.348154	-0.49568	-0.432146	-1.35939	0.239705	-0.43439	0.735763	-0.362294	-1.06286	0.404549	0.785089	0.478343	0.484103	-0.18721	0.266463	-0.321369	-0.395725	-1.72243	0.183195	-0.891603	-0.801238	1.35215	0.403638	0.592044	1.12648	-0.257847	0.839313
AATGCAAAGAAGGTGT-0	-2.01274	1.34162	-1.25004	-1.05331	1.12945	0.396123	-1.2792	1.02462	0.234552	4.42583	-3.7068	3.64081	-0.963072	-2.16464	-0.560165	1.42883	-0.321908	0.603294	-0.422004	0.175133	-0.794597	1.47977	-3.70091	-1.09332	5.5069	-1.5244	0.770394	-2.08777	1.11531	-2.38069	0.0708002	3.30726	-1.97251	-3.45382	-0.344977	1.88273	-3.91238	1.88136	0.121926	-0.636046	-0.4378	0.318042	-1.27331	-2.62725
AATGCACCAAGGTATC-0	-0.367364	0.875074	-0.335123	-1.69827	2.62762	0.064646	0.0858607	-0.561302	1.19952	0.212817	-1.0659	-0.0375817	-0.412866	-0.220453	-0.728559	-0.127107	0.0666336	-0.721663	-0.0752231	-0.392814	0.309822	-1.79143	0.373577	-1.03396	0.351305	1.92095	-0.678396	0.34078	-0.437662	1.52317	0.955034	-0.63263	-0.260952	-0.790716	0.303455	-1.13806	0.186491	0.735075	-0.694463	-1.06961	-0.299101	0.11226	0.0371575	0.758845
AATGCACCATGCAGGC-0	-1.66157	-0.0721667	-0.326987	0.0888619	0.519861	0.948458	-0.860503	0.977619	0.184594	-0.188317	-3.08429	2.34356	-1.15128	0.761244	1.47082	-0.255138	-0.641516	-1.04638	-1.25331	-0.488145	-0.401473	-0.890014	0.973164	-0.793318	-0.844151	-0.555872	-1.37432	-1.50541	0.163836	1.51381	1.54413	-1.26108	1.4777	-0.563032	1.04944	0.204621	1.20061	-0.265014	0.131444	-0.25746	-1.136	-0.865011	0.530043	0.178631
AATGCAGGTAGCCCGT-0	0.259993	1.43197	-0.32378	-1.15483	1.09327	0.735264	-1.35521	-1.39366	0.441016	-0.893646	-0.174075	-0.953054	1.56552	-0.212215	-0.238207	-0.5765	-1.08812	0.0645164	-0.148342	0.718198	-0.297234	0.254199	-1.01598	-1.25356	0.661087	0.958688	1.8872	2.28433	1.79634	0.203925	-0.604744	-0.27631	1.59002	-0.284331	0.0055976	1.61246	-1.03269	-0.127227	-0.505606	-0.00841876	0.0623173	-1.12426	0.481046	-0.127612
AATGCGAGTTGTCCAG-0	-0.596417	-3.25055	3.1978	-0.765961	-0.79734	0.119249	2.23357	0.9708	-0.795207	0.00475689	0.267317	0.905735	-1.0784	1.63429	0.858989	-0.821462	1.11976	-0.463588	1.62503	-0.72459	0.054103	1.71569	0.509285	-0.0532909	-0.421534	0.944512	-1.19833	0.620543	0.0858269	-1.62086	-0.242988	-1.13608	-1.27328	-0.114099	0.436498	1.51965	2.37846	1.47797	-0.541431	0.0843057	-0.859826	-2.29446	-0.600543	-0.322461
AATGCGGAGCCTAGCG-0	0.984779	-0.888066	-2.21126	-2.36501	-0.0442587	2.24878	1.49103	0.972509	0.111421	-0.51807	1.05206	1.70977	-0.917985	-2.20886	-1.91187	0.636705	-0.0467334	-0.662043	-1.40097	1.22295	-0.927327	1.99079	-0.202856	-0.488176	0.122753	1.74518	-0.97807	-0.547272	0.790933	-0.722063	0.325899	2.58867	-0.458814	-0.993423	0.372215	0.345887	-0.836906	2.6524	-0.839373	-1.31535	1.37165	-1.4637	0.43972	0.0258407
AATGCGGAGGTTGCTA-0	0.117081	-0.5583	1.228	-0.953504	0.829487	-0.192325	-1.14207	-0.691971	-0.721925	-0.513237	0.779251	-1.43927	0.988877	2.06548	0.330932	-0.0594826	-2.09309	-1.4786	0.0269316	0.656164	-1.18748	-0.516415	-1.0417	-0.989995	0.737408	0.00646161	0.0931019	0.781667	1.816	-0.909312	-0.575543	0.34803	1.66954	0.0966464	0.653835	0.800334	-0.618933	-0.612731	-1.00034	-2.13655	-0.0281386	0.525157	0.583682	1.86615
AATGCGGAGGTTGGTC-0	-1.28261	2.12269	-2.16871	2.52671	-0.448582	-0.562015	0.768307	0.160465	1.76748	-2.22223	0.359813	-1.20437	0.0931394	1.07888	-2.62956	-1.58146	2.00666	0.451711	-0.63742	4.12756	1.82725	-0.738105	-0.87287	2.20194	-1.48614	-3.3977	1.27714	-0.176393	1.81907	0.327571	1.41387	1.0303	-1.10679	1.6304	-1.80047	-1.43677	0.279133	-0.671843	-1.58881	0.455678	0.287415	-0.486048	0.250266	-1.17794
AATGGATGTCTAAGCT-0	-1.52213	0.710281	0.0372267	-0.391578	-0.752409	-0.601186	-2.23002	0.111565	-1.86223	-0.645394	-0.51572	0.609894	0.496647	1.07813	0.105095	-0.0213091	0.0618305	0.892192	0.236047	0.145013	-0.838821	-0.192642	0.563777	1.21339	0.0781506	-1.39415	0.736876	0.326894	0.920395	-0.56013	-0.551133	-0.627015	1.09921	-0.34409	0.307626	1.01336	0.539995	0.965853	0.102504	-0.722834	-0.124942	0.235934	-1.13374	-1.40133
AATGGATGTTGGGCCT-0	0.531258	-1.70199	0.254339	2.30837	0.784382	0.0147068	-0.410656	0.763397	-0.182571	1.20464	-0.123624	-0.0155214	-0.0801204	-1.65489	-0.602599	0.738532	0.286683	-0.62767	-0.211453	-0.494582	0.527492	1.04601	-0.694151	-0.027138	-0.376661	-1.12983	0.299589	0.635043	-0.814803	-0.734422	0.471194	0.407485	-1.13757	-0.716654	0.824369	-0.319412	-0.449788	-0.434182	0.876599	0.0819475	-0.0188535	0.262086	0.987956	-0.812362
AATGGCAGTAAGGTAT-0	0.0399352	-1.19392	0.812437	1.22193	-0.24581	-0.817525	0.344864	0.500596	1.03948	-0.421468	-0.796958	1.74804	0.159304	0.702474	0.825133	-0.403627	0.00625882	0.821155	0.0913747	0.899829	-0.475682	0.154491	-0.00991877	-0.34942	-1.74603	-0.67783	-0.756238	0.0774551	-0.625519	-0.570519	0.905582	-0.438505	-0.561451	0.0209683	0.526792	0.00984421	0.603313	0.162698	0.374954	-1.35504	-0.201052	-0.736555	0.579951	0.265392
AATGGCTCACCATTCA-0	0.297814	0.449085	0.530461	0.127246	-0.719346	-1.00923	0.589625	1.94129	-0.281055	-1.00185	0.33829	0.586265	-0.72332	1.22112	0.022062	0.259436	-0.0620603	0.109003	0.0371401	0.836095	-0.426232	0.851278	0.196388	1.01677	0.267334	-1.88188	-0.757119	-0.262844	0.349287	1.31398	0.0703424	-0.225784	-0.460348	0.361594	-1.29529	0.151301	0.940167	-1.57683	0.0594908	-0.261241	0.813192	1.32119	0.474902	0.207663
AATGGGCGTAGTGAGC-0	-0.0465369	-1.27691	-0.530545	-0.167882	-0.206421	0.481689	0.909104	-0.0997456	-0.136172	-0.654779	0.0308536	-0.453794	-0.737761	-0.900967	-0.595915	0.94835	-0.281343	-0.525582	0.722989	-0.273336	0.778829	1.1079	-1.66548	-0.67144	-0.157933	-0.254048	0.353785	-0.923294	-0.140661	1.99061	0.0736035	-0.809747	0.655999	0.103508	1.8947	0.468551	0.417682	-1.76396	-0.675959	0.312036	0.229886	-1.28569	0.987391	1.5594
AATGGGGTCGAACCCG-0	-0.28386	0.522843	-0.688435	2.6328	-0.578175	0.258636	0.242083	-0.20683	0.426481	-0.576102	-1.37467	1.66945	-0.963661	-1.9444	-1.98832	0.147315	-0.54645	1.37068	0.369146	0.829533	-0.373395	1.59306	0.109949	-1.01642	-1.52956	-2.54807	0.79302	0.216124	-1.14223	-0.708411	1.36759	0.541189	-0.748746	-1.78147	-1.34754	0.434716	-0.338817	1.22458	0.675256	0.712013	0.39543	1.1249	-0.780537	1.04283
AATGGGTAGATAGTTC-0	-0.300023	0.376668	0.229368	0.537329	0.555149	-0.769786	-0.168071	0.15175	0.0381638	0.40238	-1.50777	0.0342797	-1.66665	-0.496379	-0.169558	-0.0316548	-0.784691	-0.841836	-1.88371	0.553234	-0.473815	-1.72396	-1.6582	0.0221917	1.41181	-0.0764422	-0.164356	-0.0969122	0.684513	-0.55734	0.940541	1.14584	0.84297	-0.85272	0.404556	-0.389246	-0.720486	-0.241628	0.315689	-0.0198072	-1.99901	-0.0221797	0.000969439	1.2056
AATGGGTAGCAATTCG-0	0.0201721	0.747442	-0.572719	-0.56557	0.345094	0.545096	-0.0998839	-0.668972	-0.550982	-0.385782	1.45463	-0.0548897	0.823073	-1.44664	-0.65534	0.519353	0.100063	0.0164779	-1.99715	-0.499642	-0.146886	-0.256157	-0.885855	-0.650197	0.849964	0.106647	0.826909	-0.42366	1.73196	-1.59363	-0.157172	0.728459	-1.25344	-1.12607	0.0782735	0.66979	0.013444	0.652064	0.411379	0.524371	1.22077	0.318671	-0.412605	-0.114967
AATGGTAAGGCACTCG-0	0.221346	0.877492	0.592338	-0.941031	1.40615	-0.340505	0.180032	-0.465361	-1.01942	-0.415816	-0.160298	-0.527238	1.52856	0.548873	1.03378	0.259333	-0.154699	1.20472	-0.29219	0.601099	-0.260269	0.155492	0.312629	-0.763307	0.184556	1.91985	0.080305	-1.72698	-0.888242	-0.106929	1.90292	-1.67758	-0.410841	0.0494519	-0.149423	-1.25614	0.0647466	0.679128	-2.98593	0.302011	-1.41656	-0.31027	0.0006368	1.03242
AATGTCCGTGAAGCAC-0	0.984978	-1.22741	-0.594132	0.980902	-0.888854	0.495929	-1.70007	0.197983	0.533787	-0.634115	1.16718	0.612229	0.338977	-0.00384493	2.70023	-1.19509	0.160189	-0.473048	-0.693045	-1.45218	-0.385478	-0.950544	0.664672	0.244848	-0.742311	-1.0073	-1.50115	1.6909	-0.716551	1.52024	0.037101	-0.207554	-0.801992	0.0632215	0.242221	0.449269	1.09103	0.333845	0.639042	-0.119287	-0.222239	0.561618	-0.890111	0.0905808
AATGTCCGTTCGTGAT-0	-1.27112	-0.573274	1.2266	-0.846247	-1.41182	0.259626	1.39573	-0.3029	0.935761	-1.12839	-0.365059	-0.846072	-1.07466	0.536562	0.733406	-0.0713044	-0.315822	0.66954	-0.547907	-0.735657	0.297578	1.13362	-0.34823	-1.29045	0.237559	0.0892001	0.827326	-1.21144	-0.245299	-1.75707	0.279312	-0.250223	0.737209	-0.0539386	-0.173935	0.584784	0.42211	-0.190933	-0.623191	-0.462076	-0.58198	0.381813	0.328009	2.56154
AATGTGAAGATTCAGT-0	1.47132	0.205101	-1.80479	0.450741	-0.699893	0.222753	2.33693	-0.0973425	0.408741	-0.89889	-2.43726	-0.3215	1.12337	0.38072	1.37686	0.321827	-0.35459	-0.263528	-0.901458	-1.8575	-1.09284	-0.0938532	1.08341	-1.75395	1.70928	-1.03714	-0.346282	-1.46518	-1.76281	0.722283	-0.34	0.00576686	-1.17063	0.551671	-0.935342	1.7406	1.17927	1.11498	-1.78611	-0.249418	2.12073	-2.75362	1.28849	0.491124
AATGTGTTCAGTGCCG-0	-0.377541	-0.934912	-0.823167	0.670931	-0.959003	-0.911263	0.751538	1.38932	1.28821	0.00132584	-0.411979	0.318903	0.0708844	-0.864585	-0.697307	1.40934	-0.110771	0.467311	-0.45117	-0.267359	0.255641	0.0273771	-2.44208	-1.6538	0.39514	-0.220849	0.198016	-0.434357	-0.99838	1.3477	0.235204	1.19399	-1.1415	-0.11863	-1.0431	0.749829	0.0122364	0.736587	1.38416	-0.100724	0.962499	0.60884	-2.96498	1.09594
AATGTGTTCCGGACAT-0	0.226471	1.64488	-0.172815	0.071895	0.227509	-0.616026	0.79009	-1.82276	0.386746	-0.939655	0.217814	-0.938766	1.16619	0.130464	-0.464812	0.573144	-0.495865	0.594482	-0.73974	-0.835413	-0.699764	1.05854	0.00117625	-0.56579	-0.00985092	-1.02017	0.169251	-0.126527	0.109106	0.637756	0.0461423	0.370807	-0.0918411	-0.260834	-1.02175	0.705622	-0.148375	-1.1046	-0.474168	0.349803	0.644273	0.695512	1.27935	0.434163
AATGTGTTCTAGCTCT-0	-0.954739	0.381689	1.06955	-0.729789	-1.06363	3.20102	0.770807	-1.25145	-1.76465	0.381563	1.91123	0.713167	2.39988	0.00915987	-1.52692	1.46392	-0.210967	1.04808	-0.0446017	0.059481	-0.718979	-0.353781	-0.358919	-2.11222	0.879115	-1.07196	0.473618	-0.642507	-1.24696	-1.46391	-0.579667	3.26012	-2.65853	-1.71995	0.00561065	0.396145	-0.133072	0.859246	2.8131	0.502787	2.66709	1.29844	-0.774714	-0.341393
AATGTGTTCTCACTTA-0	0.740209	-0.119887	0.874915	-0.092454	1.55213	-1.48944	-0.748755	-0.0232699	-0.758997	-1.57599	-0.391915	-0.448032	-0.697868	0.236648	0.503267	0.191499	-2.20669	1.51297	-2.50515	0.840702	0.358121	1.77611	0.409829	-0.776723	0.348237	-0.695986	1.7849	0.232528	0.535004	-0.029982	1.10062	-0.606545	-0.285259	0.01738	0.366739	0.0909558	-0.136371	-1.1054	0.150624	0.271395	1.37407	-0.413057	1.61893	0.0150465
AATGTTGCAAGCACGC-0	0.264287	0.841644	-0.753253	-0.00742678	0.641925	0.547459	1.21727	-0.335533	-0.525397	-0.0829415	0.113526	0.0668507	-0.0385034	-0.38794	-0.858827	-0.0231543	-0.603192	1.00925	-0.217673	0.908506	0.423943	0.628683	-0.469985	0.204542	0.243345	-0.678081	-0.56107	-0.732108	0.957555	0.272485	0.111868	0.7304	-0.533651	-0.30811	-0.103941	1.11782	-0.572505	-0.417675	-0.0492232	-0.327343	0.243869	-0.623463	-1.03211	-0.30357
AATTACGCAAGTTCGG-0	1.37212	-0.916593	-0.466448	2.57983	-0.618852	-1.89735	-1.49768	1.79906	-0.240688	-1.08523	-0.708803	1.29253	-0.49521	1.42923	1.24849	-2.9353	0.473994	-0.148424	-1.06655	-0.0714743	1.4293	-0.0365241	0.296959	0.359422	-3.44732	-2.69954	-0.450317	2.49962	1.83443	-0.376474	1.33186	-1.40756	1.50128	1.26348	1.70801	0.869555	3.35615	-0.117684	0.390694	3.60782	-2.7089	-1.71888	1.1024	-0.462143
AATTCCTCAACTCGCT-0	0.711805	0.278884	-0.758742	-1.3603	-0.111342	0.299602	2.00736	-1.26871	-0.429661	-0.374224	-0.0482637	-1.10572	-0.2855	0.408337	-0.0876953	-0.0329427	-0.910908	1.02526	0.406383	-0.0897744	-0.894705	0.498933	1.53555	-0.441945	-0.299398	-0.309368	-0.576295	0.713373	-0.804463	1.90192	0.194913	-0.101311	-0.937512	1.38291	-0.763361	0.875859	0.97052	-0.707336	-0.882673	0.589622	0.353502	-0.642814	-0.530731	2.06713
AATTGGGGTAACGAGC-0	0.374383	-0.173461	0.624656	-0.306293	-0.569761	-0.739922	-0.409517	-1.538	-0.712901	-0.280592	0.117798	-0.971216	1.79122	-0.750284	-0.537587	1.27601	0.130143	2.04051	0.999819	0.868537	0.777393	-0.338584	-0.643704	-2.06602	1.91358	-0.877275	-0.750413	0.819731	-1.05397	1.48076	0.40975	1.46322	-0.791906	-1.93864	0.776523	0.199164	-1.35079	-0.242439	1.18683	0.189084	2.12131	-1.23828	-0.289244	0.057497
AATTGGGGTCTGTGGC-0	0.155007	-0.83952	-2.56315	2.56237	-0.685826	2.19064	-1.44979	0.985667	-0.032516	3.81986	0.177447	-0.331718	0.126471	-2.67806	-1.01436	0.707935	-1.07194	-2.63548	0.878753	-1.04237	0.17338	0.636963	-2.32652	-0.31984	0.29494	-2.02183	0.12245	0.57132	-2.34919	-1.26948	0.914514	1.90436	0.265326	-1.40395	1.14278	-0.0786448	0.884022	-0.72752	0.203318	0.0209668	0.0681339	-0.745293	1.77449	-1.24466
AATTGGGGTGGGTATA-0	1.0386	1.29388	0.355713	-0.240839	0.387889	1.14774	-0.618292	-0.327816	0.355649	-0.270351	0.549498	1.3744	-0.346636	-0.41046	-0.282041	-0.545066	0.804375	0.612791	-0.258372	-0.268337	0.775333	-1.40086	0.104361	-0.254281	0.201772	1.01497	0.00689034	-0.120631	-0.911709	-0.232905	-0.247972	0.291976	-1.5256	-0.370585	-0.0525976	-1.35069	-1.21787	1.6455	0.398191	0.706682	0.436118	-0.507718	-1.41247	-0.7807
AATTGGGGTTGTGCTG-0	1.77195	1.50448	-0.694091	0.122696	-2.88732	-1.26778	-1.55872	1.77659	1.50741	-3.13351	-1.32335	1.74912	-0.477475	1.16061	0.240415	-6.0194	1.43993	0.0981342	-0.904967	-2.54426	1.93755	1.23448	3.37783	3.45059	-2.02921	3.37518	-0.505195	2.77559	1.62655	-1.36622	-2.37416	-3.3101	-0.739838	4.07509	-1.62887	0.883543	2.03508	-0.179402	-1.68766	4.20814	-1.4935	1.53125	0.556988	-0.316385
AATTGGTTCGCTGATA-0	-1.06518	-0.199429	-0.474072	1.05596	0.365604	-2.25921	0.675419	-0.429598	1.02367	1.43343	0.985432	0.234407	-1.07451	-0.777383	-0.0135113	-1.68177	1.02657	0.634923	-1.94622	-0.491517	1.30738	1.33453	0.650327	0.6191	-0.801164	0.479763	-0.670462	0.570854	0.510942	-1.60185	1.24036	-0.93206	1.14491	0.532589	1.44302	0.342467	0.33636	-0.795147	-1.25389	-1.88591	-1.64039	-0.563127	2.08606	-1.06738
AATTGTCAGCATCCAA-0	0.808702	-0.373977	0.115676	-0.252007	-0.136188	0.108321	0.168119	1.10198	0.227765	1.12532	0.164685	0.513843	0.733106	-0.59882	0.489698	0.989483	1.12474	0.476368	-0.583679	0.476864	-0.49524	-1.10358	-1.11541	-1.08065	-0.0660283	0.556405	-0.278539	-0.46962	-0.946765	0.580806	1.57582	1.4592	-1.66432	0.330938	-0.797986	-0.280231	-0.569279	-0.55108	-0.182605	1.14229	-0.236769	-0.56755	-0.241428	0.784058
AATTGTCAGCGAAGCA-0	-0.125234	-0.482645	0.485695	-0.226734	1.20779	0.465463	-1.07592	-0.895641	-0.289204	-0.402217	0.762004	-0.434138	-1.00453	0.752297	-0.0943379	0.297754	0.714828	-0.184146	-0.0407263	-0.24803	-0.0819882	-1.25047	0.661171	-0.621822	0.357855	0.399897	-0.111294	-0.644746	-0.123877	1.56191	0.121433	0.00582479	0.247455	-0.818168	0.00781064	-0.139906	-0.573497	-0.221136	-0.240844	1.22844	0.223174	0.18633	0.0562832	-0.594886
AATTGTCAGCGATGCT-0	-0.487017	0.782664	-0.603938	-1.42343	0.967745	0.254903	-0.419883	-0.342397	-0.454944	-0.0954417	-0.265514	-0.960961	-0.198001	-0.181531	-0.623904	0.937748	-0.406507	-0.0552205	-0.189744	-1.17948	0.309761	-1.27734	-1.0235	-0.247914	0.830529	0.624929	-0.198593	-1.09096	0.247326	-0.00240461	0.724609	0.603375	0.57749	-0.150689	-0.0665503	-0.834911	0.0429376	0.157246	-0.340041	0.28652	-0.00694761	0.89688	-0.245291	0.399482
AATTGTCAGGCGCTAT-0	0.053023	0.967079	0.700772	-0.351093	0.427581	0.625216	1.19534	-1.15484	-0.853655	0.113711	-0.531405	0.646324	0.691871	-0.517836	-0.423289	0.230942	0.440828	0.21954	-0.583006	0.190747	-0.444336	0.150479	1.4411	-1.03617	1.1076	1.81127	-1.40255	0.543699	-0.281896	0.347841	1.8077	-1.72327	-0.843153	0.526978	0.206967	-0.133295	1.44302	0.999087	-2.04055	-1.32816	-1.90634	-0.614276	-0.571481	-0.305269
AATTGTCAGTCATCTC-0	0.231212	-1.619	1.37138	0.632778	-1.22718	0.981279	0.0707501	0.0595501	0.288632	0.688534	-0.22881	-0.872206	0.146787	-0.247093	-0.569438	0.48894	-0.237305	-0.605569	1.54454	-0.948408	-0.295231	0.339826	-1.11362	-0.516467	0.401348	0.130652	0.445192	-0.823617	-0.604364	-0.863077	0.105607	0.228413	0.17433	0.249439	-0.0313499	0.528296	1.28214	0.925532	-0.335504	-0.742346	-0.0602841	-0.23667	-1.05952	0.711991
ACAACAGGTATTAGCC-0	-0.260378	0.85841	-0.142772	0.934008	0.393886	1.73092	-0.7051	-0.538418	-0.766383	-1.38341	1.6274	1.36347	0.745469	0.668034	-0.667209	1.36541	-2.83847	-0.399744	-0.30703	-0.124874	-0.583433	0.242631	0.426732	-0.0983559	0.18913	-0.958915	-0.3941	-1.38768	-2.05154	-0.0233704	1.18316	0.116054	0.0276845	-0.19846	-1.52773	0.229943	-1.97894	0.716934	0.725348	-0.76796	0.111042	1.36507	-0.271937	1.60888
ACAACAGGTTGGCATT-0	0.41406	0.801796	1.30644	-0.965053	0.708277	0.565149	0.054154	-0.502293	0.9816	0.144587	0.400609	0.104498	0.0970072	-0.0251126	-1.72478	0.647368	0.379551	-1.03358	1.62936	-0.402749	-0.645986	0.404507	-0.508254	-0.965336	0.167246	0.314677	0.361379	-0.950067	-1.17511	-0.949067	-0.545001	-0.00361329	-0.947645	-0.320636	-1.42001	-0.213366	0.414468	1.96318	-0.114925	1.12589	1.1902	0.710703	-1.56954	0.0827287
ACAACATTCCCCAGGA-0	0.591705	1.21145	0.0426818	-1.55485	0.0814879	0.752267	-0.0179363	-1.18213	-0.103335	-0.449932	1.27169	-0.963316	0.77351	0.934961	-0.273475	1.45085	-0.167879	-0.747194	-0.0599048	-0.726637	-0.901614	0.615474	-0.362772	-0.863041	1.1682	0.183001	0.481127	0.741919	-0.585857	-1.48047	0.0771276	1.48748	0.0605786	-2.43513	-0.305728	0.0764454	-0.514158	1.56019	-0.731204	-1.38115	0.240415	1.73462	-1.30958	0.628494
ACAACATTCCCGTGAG-0	1.6666	-3.2886	0.0454471	1.02375	-1.69547	1.08119	0.2123	1.68195	1.01092	-0.560183	-1.69516	0.760289	0.703773	-0.674573	-0.861559	1.26253	0.482142	1.40257	0.804505	-0.396305	0.340866	-0.83691	-0.204895	-2.20187	1.24681	-1.72643	0.738932	1.40727	-0.494916	1.37906	-1.3905	2.70979	-2.69543	-0.611887	-0.484503	0.825154	-0.767252	1.84492	1.43015	2.71527	1.95761	-0.829851	-2.66464	0.681556
ACAACATTCCTGAGAC-0	0.707916	0.318093	-2.0496	-2.14068	0.927406	0.521757	-1.20236	0.323449	-0.625362	-0.146637	1.30261	-1.56121	-1.76806	-0.461907	-0.485835	-0.314558	-0.752194	0.471309	1.42446	-0.948015	1.59506	0.273635	0.522204	0.677501	0.1854	1.40782	0.130591	1.13069	-1.40861	0.814951	-0.275095	0.318498	1.98015	0.197044	0.924318	-0.231044	-1.74365	1.09485	0.454094	-0.529344	-1.05155	-0.802065	0.242539	-0.538058
ACAACCATCACACCAA-0	1.40792	-1.49375	1.72489	0.816523	-0.818436	0.380944	-1.65105	-0.148548	1.96402	-0.586363	0.603223	0.0869281	0.403789	-0.0635923	-0.49304	0.101425	-0.479785	0.144068	-1.41459	-1.04439	1.21876	0.11061	0.0033519	-0.351044	0.576693	0.325795	0.130693	-0.330041	-0.0297851	-0.67974	-0.501438	1.49176	-2.94111	-0.0954111	-0.735537	0.584774	-0.746002	0.256901	1.48215	1.51384	1.42164	0.801876	-1.35173	1.47543
ACAACCATCATGCCGG-0	2.13143	0.273502	-0.870245	0.892418	-0.98476	1.25257	0.790371	-0.881017	2.51149	-2.50872	-0.378485	-0.991215	0.465033	-0.760451	1.58591	-0.165912	-0.0189053	0.934242	-1.49264	-0.797535	-0.330994	-0.391794	0.825225	-0.0511244	-0.660475	-1.18949	0.39994	1.60603	-1.42876	1.23869	-0.235264	0.473401	-0.300832	-1.885	-1.39374	0.0381833	-0.391238	0.578201	1.98054	2.76356	2.05698	-1.24626	-1.84528	-0.137929
ACAACCGCACCTAATT-0	-0.96737	-0.230631	0.256978	-0.470443	-0.123541	-0.616419	-0.903436	-0.753725	0.42022	-0.746179	1.00626	-0.522763	-0.14389	0.344787	-0.237468	0.387029	1.09087	0.250764	0.505742	-0.244341	-0.178213	-0.178143	0.379633	-0.270831	-0.441399	-0.37483	-0.0568641	-0.185385	-0.090778	-0.0137583	0.688304	0.496829	1.80311	-0.408651	0.131813	-1.07758	0.826279	0.957325	-0.274025	0.731647	-0.316246	-0.713716	0.359819	-0.868156
ACAAGCCTCAATCAGT-0	-0.436108	1.97591	1.29393	0.867809	-0.222697	0.470045	-0.039182	-0.883453	0.606859	0.192754	1.59297	0.841767	-2.55948	-3.50116	-2.3984	-0.330569	0.307722	-1.19328	0.383887	3.11044	2.49609	0.125427	0.00144434	0.550892	-1.01917	-1.80951	-1.00908	0.849189	0.0526251	0.918321	1.28275	2.17403	-0.403781	0.862676	-1.36879	-0.780341	1.31588	-1.42953	2.45886	4.34614	-0.990248	1.0311	-0.477448	-0.747887
ACAAGCCTCATCACAG-0	1.64591	-0.803206	0.213672	-0.137128	-1.23234	-0.448228	0.593352	-0.0862036	0.568027	-0.666892	0.0229069	-0.946097	0.9134	0.0537159	0.568244	-0.374985	0.797041	0.986473	-0.173574	-0.287742	0.353049	-1.44938	0.212863	-0.512839	-0.975397	-0.286631	-0.0452588	0.817011	0.0316325	0.0834189	-0.316718	0.625361	0.21796	0.869183	-0.0958555	1.20177	1.5435	-0.369329	-0.579885	-0.836858	-0.249825	-0.240118	0.162474	0.272999
ACAAGCCTCGCTCCTA-0	-0.117661	-1.55733	0.100264	-0.555865	1.41377	-0.605148	-0.784171	-0.604802	-0.372823	0.0866243	0.534233	-0.630685	-0.5301	0.116441	-0.0410046	0.549987	0.468153	-0.708839	-0.633738	0.269785	-0.498152	-2.35526	0.357825	-1.20352	-0.117488	0.968629	-1.00481	-0.39532	0.26398	0.134558	0.83246	1.04489	1.47292	-0.226231	1.09382	-1.00421	-1.63946	1.58442	0.431289	-0.00189368	0.104916	-0.796386	0.701452	0.171593
ACAAGCCTCTCATCCG-0	1.37358	-1.9277	-0.121723	-0.50026	0.680927	0.130359	0.0164922	-0.394039	-1.06021	0.856659	-0.0893689	0.399067	0.89127	0.920273	0.438457	0.723888	0.377061	-1.0024	-0.164594	-0.35661	-1.15839	-1.08732	-0.600481	-1.39398	0.20253	-0.512331	-0.669941	-0.306104	-0.0683345	0.513414	1.47423	0.20026	-0.768866	0.148222	0.477232	0.522392	1.50957	1.1134	0.694845	0.327703	-0.139188	-0.0161098	-0.584666	-0.535576
ACAAGCTCACTAACGG-0	-0.199617	-0.465932	-0.0118914	-1.03012	0.965989	0.379524	-0.593819	-0.673191	-0.683632	-0.00562129	1.04528	-0.440736	-1.22326	0.526068	0.648119	0.193849	-0.203505	-0.1057	0.321515	-0.174327	0.269658	-0.255518	0.233205	-0.247702	0.252367	0.927868	0.179571	-0.763175	-0.80211	0.655599	-0.641238	0.0379983	0.0394733	-0.843258	0.694399	0.22981	-0.664234	-0.279369	-0.493461	0.743112	-0.649881	0.976791	0.418331	-0.227661
ACAAGCTCACTTCAGC-0	-1.4327	0.873286	-0.558036	-0.0280608	1.06587	-1.96106	-0.590199	1.66687	0.357761	-0.318554	-1.37905	1.81632	-0.785004	0.0920258	-0.517799	1.52761	-0.376184	-0.477773	-0.371036	1.19784	0.622075	-0.735343	-0.771046	1.31104	1.34053	0.118983	2.56257	-0.762324	2.13563	0.23115	-0.396777	-1.11132	1.53698	-0.0707532	0.938424	-1.36332	-0.997487	0.121746	-0.615527	0.3706	-1.28805	-0.674539	0.208953	-0.302892
ACAAGGCGTGAAGCAC-0	-0.748944	0.353186	0.503168	0.0850461	0.262598	-0.532832	1.04061	-0.26459	-0.137185	0.946495	-0.404193	0.301514	0.658011	0.0355758	0.860018	0.967542	0.119837	-0.912642	0.332068	0.203999	-0.0288581	-0.763965	-0.292291	0.451731	0.0674447	0.316943	-0.245856	-1.49608	-0.219942	0.440049	-0.343113	-0.453208	-0.160045	-0.16132	0.329257	-0.802218	0.559755	0.050535	-0.515605	-0.46181	-1.06726	-0.319584	0.578439	0.0192873
ACAAGGGTCGACATCA-0	2.55027	-2.11886	0.818131	-0.329483	-0.110272	-1.86818	1.46058	-1.06666	0.608688	0.847344	1.05289	-1.06352	-1.6689	1.71617	-1.04454	-2.76806	2.88068	0.350804	1.12753	-1.35919	6.34857	-0.2618	0.811565	0.283337	-1.63308	-0.498383	0.128229	0.643271	1.23015	-0.543995	-0.383035	0.283708	1.18633	2.37744	0.533517	-0.322454	4.68647	-0.197032	-2.44959	-0.289878	-0.388066	-0.536874	1.03574	-1.50925
ACAAGGTAGAATCGTT-0	-1.60417	0.413259	-0.365915	2.37433	-1.42396	-1.53447	0.819065	-0.821596	0.319026	-0.223846	-0.577113	-1.28088	1.55453	0.427724	-0.699362	-2.23767	1.94397	0.384234	0.278879	-1.42767	2.82184	1.63767	2.29261	1.13426	-1.63407	0.905628	0.241255	0.649586	0.0673786	-0.392715	-0.0194765	-3.16325	0.993813	3.0697	-0.0499622	0.901984	1.65078	-1.83378	-2.41551	-0.477466	-0.563398	-0.212921	1.86484	-0.746485
ACAAGGTAGCGATGCT-0	-0.268364	1.06446	0.640581	-1.01827	-0.402275	0.904022	-0.278873	-1.35769	-0.502318	-0.952271	0.790209	-0.775753	-0.292282	-0.529769	-0.315557	0.813897	0.374983	0.302053	0.108134	0.135246	-0.0591906	-0.333454	-0.565186	-0.125448	0.572859	-0.156705	0.0768607	-1.2236	-0.469998	-0.754031	0.272324	-0.1936	0.804166	-0.813596	0.197	0.495253	-0.19627	0.361221	-1.17226	-0.547305	-0.32107	0.858865	0.178772	0.0566142
ACAAGGTAGCTTAGTG-0	0.313186	-0.345787	-0.793361	1.19312	0.161986	-0.0755467	0.166083	0.368124	0.0603313	0.172233	-0.344432	-0.483591	-0.578918	0.0147207	-0.264539	0.178923	0.511594	0.707155	0.0191729	0.308149	-0.700239	1.14548	0.828534	1.25279	-0.0223444	-0.844881	-0.93224	0.220378	0.608047	-0.213041	0.15608	-0.469147	-0.257918	-0.514927	-0.366691	0.0708928	0.850829	0.782651	-0.245949	-0.541874	1.26953	-0.875344	-2.5029	-1.19182
ACAAGGTAGGTTACAT-0	1.07256	-1.52674	-2.42803	-1.95845	0.0394737	-0.269711	1.61966	0.57362	-1.37971	0.197361	-0.44448	0.00945823	-1.47406	-0.00667042	0.818425	0.492797	-0.770807	1.79105	1.98293	-1.38174	1.31353	-0.689593	0.535993	-0.965283	0.736468	0.704549	-1.03324	0.108002	-0.547267	2.74889	-0.182888	-1.41811	-0.119345	1.23718	-0.85725	2.5834	3.67457	1.70786	-1.48539	2.38899	-1.4575	-0.897284	-0.0476688	-0.211376
ACAAGGTAGGTTCGTA-0	0.613395	0.216022	0.0287865	0.559189	0.892566	-0.172359	0.368471	0.422749	-1.35599	1.8263	0.260016	-0.169449	0.953142	0.282353	0.373784	-0.293229	0.639706	0.790733	-1.09938	0.988248	0.150035	-1.40624	-1.97701	0.584211	-0.52629	-0.0775909	0.513901	1.06146	1.38484	0.181774	-0.776138	-0.719302	-0.933566	-0.319067	-0.354848	-0.719062	0.470318	-2.45735	-0.621916	-1.04479	-0.108528	0.0418883	1.40355	-0.0218431
ACAAGTAAGGCAATGG-0	-0.460123	-0.493608	-0.375429	-1.31585	-0.705132	0.581467	0.307978	-0.526353	0.622224	-1.43862	0.161441	-0.437906	-0.560121	-0.0565758	-0.181358	0.549009	0.217625	0.750573	1.14534	0.295034	-0.194508	0.450837	0.228158	-0.0260134	-0.412177	0.131931	-0.362699	0.0834671	-0.0157913	1.18895	0.0903077	-0.546273	0.380391	0.652752	-0.0043868	0.447143	0.480163	1.32008	-0.514637	0.0351268	0.175237	-0.132827	-1.52361	0.116619
ACAAGTTTCCCGTTGC-0	-0.951442	0.026522	-0.613804	-0.434956	0.601082	-1.37819	1.81724	-0.823137	-0.107961	0.0723688	-1.84456	0.681203	0.573595	0.331401	-0.0146141	-0.0884969	-0.949555	-0.0634059	-0.515092	0.139991	0.485285	-0.568545	0.637401	-0.160376	2.91692	0.179279	1.04511	-0.54871	1.41726	0.44278	0.284153	-1.09314	-0.29881	0.268207	-0.143808	-0.908197	2.48912	-0.260449	-0.896273	-1.41071	-1.25103	0.0765342	-0.367296	0.836639
ACAAGTTTCGATTAGT-0	0.398874	-0.263279	-0.307512	0.385415	-0.316426	-0.3701	-0.417511	-0.486921	-0.620086	0.550542	0.0751658	-0.699877	0.476455	0.375961	0.607257	0.0944665	-0.273406	-0.472853	0.444392	0.16369	-0.861342	1.51805	0.553043	1.02653	-0.346438	-0.0445754	-1.18211	-0.528253	-0.879835	0.202797	0.480616	-0.337514	-0.305546	-0.35081	-0.243171	-0.0187362	0.266071	0.506371	-1.01845	-0.378152	-0.656211	0.46522	0.359975	0.412641
ACAATAGAGGAGTAGT-0	-0.244063	-0.365137	-0.880826	1.22084	-0.840688	0.424514	1.66675	0.756745	-1.22489	0.0467898	-1.34277	-0.355958	-0.0685294	0.420124	-0.475217	0.128844	1.62087	-0.164161	-0.340523	0.436554	-2.21308	0.749084	-0.519102	0.895409	2.0035	-2.13255	0.622453	-0.773453	2.27386	-0.193537	-1.07109	-0.198943	-0.475726	-1.71224	-0.158065	-0.385006	0.962784	1.36139	-1.64959	0.420073	0.42956	-2.19785	0.180019	0.569253
ACAATCACATCGGCTT-0	-0.575255	0.158316	0.884781	-0.493894	0.978001	0.442312	0.0177135	-1.2271	-0.709909	0.396665	0.277089	-0.166452	0.893734	-0.144532	-1.09439	0.539644	0.387231	0.0610457	-1.21933	-0.809938	-0.474405	-0.308979	-1.61114	-0.848407	0.702653	-0.0854027	0.918245	-1.01936	1.39801	-1.37322	0.609462	0.73394	-0.755275	-0.342185	0.569754	-0.0186693	0.188024	-1.04789	-0.122995	0.0482487	0.795527	0.452188	0.189941	0.487083
ACAATCACATGAAGCT-0
ACAATCCGTAACTCCG-0	-0.155555	0.404373	-0.89759	-0.278023	0.288388	0.283177	-0.336229	-0.696536	-0.542345	-0.427008	0.745575	-0.815923	-0.205676	-0.157552	0.150425	-0.145305	-0.556412	0.0348771	-0.268544	-0.433736	-0.388083	-0.135946	0.264367	0.9444	-0.0137068	1.15539	0.213863	0.305515	0.364351	0.359762	0.158335	-1.08337	0.213645	-0.791738	0.556195	0.23918	-0.42912	-0.476816	-0.899401	0.17192	-0.316632	1.34376	-0.0609257	0.13842
ACAATCCGTATGTGGA-0	-0.691703	0.328574	0.42158	-0.887182	1.42704	-1.11921	1.05648	-0.120739	-0.223158	0.113891	0.00131666	0.546161	-1.83191	-0.806812	0.708434	0.204899	-0.130006	0.810036	0.174449	-0.402896	-0.506506	-0.393541	0.392502	-0.515146	0.155618	0.531079	0.526092	-2.46276	0.0378198	0.295654	-1.08088	-0.554944	-0.013283	-2.1522	1.92158	0.317969	-0.340468	0.344903	-0.979589	0.393793	0.309924	-0.986231	0.710306	-1.23091
ACAATCCGTCAGCTAT-0	-0.956893	-0.311167	-0.586917	2.45221	0.794259	0.416807	1.70674	-0.346962	-0.317429	-0.236262	-1.00526	-0.452836	1.43708	0.444452	-0.696526	-0.217426	0.201136	-2.95488	0.253035	1.48361	-1.20532	1.66162	0.97407	1.07828	0.525379	-0.43289	-0.623124	0.621226	1.36612	0.0989907	-0.644339	-1.76697	-0.930576	-1.38383	0.333906	-0.574224	0.182109	-1.3363	-0.768633	0.571455	0.258195	-0.327629	0.679299	1.22132
ACAATGAAGGAATGCG-0	-0.992286	-0.14879	0.940205	1.29619	-0.0614784	-0.850304	-0.793546	-0.000929486	-1.12214	0.197682	0.215976	-0.40698	0.641595	1.53824	-0.108096	0.403686	-0.354421	-0.5059	0.8024	-0.144323	-0.885696	-0.384229	-0.481669	0.947835	-0.736436	-0.669688	0.336801	0.941995	-0.144586	0.289739	0.500626	-0.304236	0.798147	0.388147	-1.14641	-0.00520149	0.167705	-0.20297	-0.444451	-0.53774	0.558792	-0.292949	0.909342	0.250161
ACAATTCAGAAGCTCC-0	-0.264655	-0.446876	-0.249723	0.197816	-0.925281	0.0695216	0.41129	-0.291464	-0.223819	0.439939	0.44426	-0.000632591	0.471035	-0.03214	-0.380691	0.374659	0.744238	0.330388	0.529495	-0.191754	0.225984	0.84755	-0.387256	1.21132	-0.480642	-0.0258347	0.312241	0.189842	-0.987244	-1.46981	-1.0489	-0.0416755	-1.16899	-0.654087	-0.00128369	0.59276	0.686129	-0.196985	-0.2065	0.397069	0.376157	0.280011	0.683127	-0.0997701
ACAATTCAGGGTTAGG-0	-1.40087	0.353567	-1.7223	-0.921079	-0.373625	-0.0619274	-1.15718	-0.053877	-1.62084	-0.556458	0.875978	-0.780286	0.429391	0.665686	-1.00726	0.148874	-0.440394	0.981348	1.23996	0.298709	0.882023	0.347342	0.375677	1.26511	-0.40774	-0.0587774	0.406637	-0.488237	0.578488	-0.188224	-0.73355	-0.7667	0.749675	-0.778409	0.62105	1.04269	0.0999201	0.0664046	-0.0348092	0.138653	0.503888	0.494608	0.0182576	-0.368421
ACACAACCAAGGTCAT-0	-2.46533	0.770704	1.02017	-1.02963	-0.910978	1.48867	0.432523	-0.640308	1.20831	0.0109896	-0.581163	0.58838	-0.167336	0.979302	0.631818	-1.10615	-1.54649	-1.21912	-0.710414	-0.148986	0.895516	1.42885	1.00011	-0.947683	-1.00275	0.877884	0.647603	0.382589	0.780955	-1.89732	0.666767	1.80096	-1.2677	1.49386	-0.948255	1.35549	-0.245781	0.54798	-0.691893	-0.523312	0.0787305	1.55339	-1.78923	-0.016027
ACACAAGGTCAGCTCA-0	-0.225195	-1.50351	-1.08306	-0.690807	-0.700423	1.45259	2.29508	1.42911	0.624673	-0.848733	-0.544421	0.255133	1.11146	-1.68672	-0.475851	0.616881	0.290443	0.240481	0.077026	-0.345031	-0.205435	0.749435	0.683828	0.461172	-0.138009	-0.959335	0.179179	-0.524784	0.0133174	0.226268	0.223612	-0.115283	-1.60109	-0.221506	0.191147	1.75791	1.38714	0.53454	1.84106	0.500251	0.0413267	-0.387741	-2.01668	-0.495643
ACACACGCAATCGCTC-0	3.52838	1.69381	-1.10808	-1.0226	-0.0749189	0.112055	-1.93044	-0.17173	-0.160556	-0.962528	2.22486	-1.27033	1.22036	-3.06152	-0.879376	2.21058	0.486181	-1.28986	0.640998	0.37493	2.24621	-0.934372	0.287054	2.81338	-0.782673	1.73349	1.13447	-0.956435	-0.635646	-0.436476	-1.1584	0.526406	-1.14798	-0.00616419	0.973575	-0.0996139	-1.45502	3.98276	0.805798	-2.00761	-3.10924	0.39189	-2.43775	-3.10028
ACACACGCATCGACTC-0	0.0352146	-0.0414654	1.07074	-0.765676	0.152441	0.0697765	0.946477	0.237135	-0.21276	1.06206	0.576236	-0.495122	-0.654545	0.397383	-0.382726	-0.185395	-0.201071	0.724506	1.10963	-0.510575	0.265676	0.864759	-0.600537	-0.904474	-0.114835	0.548407	-0.421567	-1.33854	-0.306461	1.32541	0.936254	0.732761	-0.846637	-0.227792	-0.870144	1.27891	0.606323	-0.196735	-0.777582	1.09781	-0.901064	0.263437	0.0480129	-0.393265
ACACACGCATGAGCGC-0	2.41228	0.0878127	1.09484	-0.53793	0.692252	-2.12251	-1.0554	-0.510843	-0.692046	-0.767561	0.838836	-1.23931	-0.308305	-0.687852	0.770128	-0.757537	-2.04686	1.87516	0.000408439	0.371091	-0.107054	0.780972	-0.0425296	-0.911718	0.389124	0.665258	-0.0383497	1.3835	-0.6934	0.887624	-0.0752699	-0.736561	1.60759	-0.927826	0.349376	0.807125	0.554069	-0.707913	-1.25767	1.05973	0.618409	-0.934652	0.278401	0.790382
ACACAGTCATCCTCGG-0	0.643762	-1.01026	-0.278945	-1.35057	-0.0767887	-0.42123	0.562917	-0.783313	0.569814	0.421726	-1.77742	-1.02019	-0.987467	0.059596	1.18362	-1.66665	2.1885	1.11294	-0.281641	0.0313952	2.29909	-0.502	-0.0583624	-0.384511	0.300337	2.50225	-0.172831	-0.499565	-0.227345	0.240353	-0.0127095	-0.0685009	0.524651	0.0471092	1.419	-1.89334	-0.925326	0.173461	-0.571239	0.824837	-0.317041	-0.632238	0.563428	-1.41607
ACACATTAGTGTCATG-0	-0.645341	-0.0409168	-0.561091	-1.64478	1.15984	-0.879	0.121322	0.118179	0.465165	-0.0148853	-1.27839	2.26162	-2.08341	1.00148	0.290066	-1.9108	-1.53123	1.32116	-0.979411	-0.819563	2.60797	-2.82777	1.84101	0.565835	1.08227	-1.08371	1.66819	0.702046	0.519854	-0.941406	-0.850818	0.189993	1.06456	0.128436	1.70737	1.41938	-0.56147	0.211884	1.43929	1.49089	-1.73834	0.975106	0.225398	-0.677396
ACACCAATCCTCTATA-0	0.0499576	0.783866	1.67822	1.77594	-0.420938	-0.798036	1.66169	-1.45756	0.909166	-0.318994	0.652374	-0.291147	1.19498	-0.670097	-0.48563	-1.13321	0.364743	0.882442	-0.748941	0.376531	0.345198	1.06724	0.00453016	-0.533374	-0.589566	-0.0147879	-0.102259	-1.29859	0.335551	-1.91532	0.705091	-0.49214	-0.524353	-0.426777	-0.966711	1.0574	-0.539456	-0.129713	-1.16673	-0.902102	0.207344	0.793197	0.903237	0.470148
ACACCAGCACAATCCC-0	-0.728795	-0.00389437	1.16435	-0.644484	-0.295721	1.08502	1.79335	-1.14466	0.229769	-0.00153869	0.0744125	1.09077	0.709837	-0.628247	0.118926	0.6166	-0.0143293	-0.101736	0.693365	-0.200783	0.224426	-0.414058	-1.28049	0.418228	1.04841	0.105332	-0.372922	-1.1726	1.00949	-0.778289	-0.972177	-0.442167	-0.474358	0.0529393	0.569811	-0.582041	0.908901	-0.973893	-0.82692	-1.71491	0.600597	-2.84191	0.386636	2.17944
ACACCCAGTATTGCCG-0	3.08522	0.436266	-0.986543	1.50604	-2.49744	1.51696	-0.6395	3.12834	-0.587928	0.560477	0.990224	2.64109	0.524299	-1.15809	1.88911	0.820941	0.944669	1.16535	-1.80587	0.709335	-1.62515	-2.0121	-1.34767	-0.656652	-0.263747	-0.647102	0.819815	-1.17096	-2.02199	1.47065	0.853687	1.06824	-1.4897	-0.537242	0.528869	-0.403279	-1.59244	-1.23706	-0.136438	-1.77073	-0.077874	0.100362	1.363	-2.47846
ACACCCAGTATTGCGT-0	-1.34485	0.923071	0.58721	-1.21505	0.605344	-0.0480909	-0.447991	-0.472955	-1.15679	-0.845046	0.215188	-1.24383	-0.70603	0.242528	0.245039	-0.256119	-2.53797	0.026453	0.14708	-0.536646	-1.65754	0.585503	1.61415	-0.0640123	1.14007	1.01682	-0.659602	0.781301	0.431427	2.12126	1.8882	-0.658031	1.2104	0.939743	-0.603341	-0.372153	-0.751227	-0.302343	-0.266036	0.572624	-0.445099	2.12952	-0.977629	1.38458
ACACCCAGTGGACAGT-0	-0.991017	-3.04509	0.609653	-1.54375	-1.35431	-0.248083	0.574721	-0.383971	-0.129065	-1.24426	0.0900439	1.44895	-0.36855	-1.14007	2.09216	0.173325	0.395679	-0.443354	-0.672626	-0.270356	-0.555606	0.744576	1.49047	-1.24991	-0.591632	1.42237	-2.07542	0.580922	0.560607	0.806984	1.02888	0.618486	-0.893972	0.242584	1.45416	-0.319817	-0.571444	2.08524	1.4415	0.645686	-1.07055	-0.525607	-1.15378	0.278723
ACACCCAGTTGCAGGG-0	0.959862	0.0476674	-1.61458	-0.245891	0.832487	1.49743	1.92177	-0.357548	1.30481	-0.236229	-0.359186	-0.0650028	1.83923	-1.23317	0.310018	0.404819	-0.213069	-1.82842	-0.0140016	-0.47967	0.312845	2.62333	-0.482444	-2.77674	-1.92251	0.614774	-0.291957	-1.2819	-2.52653	-0.319009	0.0657793	-1.36514	-2.13959	-1.08904	0.119418	2.04043	-0.110083	-0.663533	0.246787	0.270501	1.0208	-0.347489	1.44822	0.364738
ACACCCTCACTCAAGG-0	0.287827	0.375425	0.624588	0.243886	-0.379507	-0.747028	-0.842361	0.241983	0.358567	-1.45048	1.34654	-0.116385	-0.339763	-0.18008	0.536861	0.288799	0.250236	-0.0893303	-1.24555	-0.98107	-0.659665	0.107012	-0.5324	-0.275467	-0.534742	-1.32851	-0.23139	1.25889	-0.692728	1.42811	0.118538	0.903176	1.11447	0.951648	-0.758979	-0.444194	1.11517	-0.25273	-0.403288	0.0789436	-0.553225	0.171569	-0.436685	0.728046
ACACCCTCATCGACAG-0	-0.0146062	0.345656	-0.0775782	-0.0223295	0.268933	-0.4618	0.891855	-0.351628	-0.321823	0.317153	0.726794	-0.613202	0.180969	0.257737	-0.968108	-0.874867	1.45724	0.591473	-0.537425	-0.32354	-0.0666832	0.158998	-0.497604	-0.141268	0.550403	1.24786	-0.460225	-0.676101	-0.689099	-0.368606	0.0149094	0.816247	-0.0232489	-0.380467	0.468553	-0.637229	-0.957025	1.17947	-0.524166	0.718071	0.645007	-0.574242	-0.478917	-1.25963
ACACGAAGTAACGTGA-0	3.62866	0.147922	1.28438	1.54103	-0.888615	-1.06676	1.65014	-0.25893	0.987338	-1.33482	0.320825	-0.0761518	-0.57122	-0.578091	0.328203	-2.03873	0.616599	-0.175447	1.22033	-1.09318	1.28217	-0.281673	0.679754	0.951549	-2.15521	0.349163	-0.277991	1.8863	-1.00987	-0.683918	-1.41526	-2.36716	-0.591821	1.46563	-1.48608	1.2992	0.965243	-0.917662	-0.153517	-0.288886	0.267578	0.201292	0.631124	-1.31319
ACACGAAGTGCACGCT-0	0.288057	-0.563359	-1.24748	0.654772	0.417038	-0.19445	0.43723	-0.0831011	2.35156	-0.668305	0.0725151	0.554342	-0.445286	-0.747517	-0.582881	-0.0450907	0.364955	1.87646	-0.81088	1.71194	1.73744	1.34357	0.594692	-0.436018	0.298579	-0.293154	0.0151182	-0.593694	-0.646207	2.19907	-1.82994	0.914917	-1.27232	0.0278773	0.367634	-1.20085	-0.648485	-0.61174	1.45825	0.24026	1.62187	-0.72761	0.72357	0.352097
ACACGAAGTGCATTAC-0	1.63302	-1.90214	-1.73008	0.92103	1.3361	2.15116	0.918738	-0.456099	-0.218034	1.71606	-0.0759278	0.614541	-0.361463	-0.945661	0.978537	-1.56712	1.66126	0.163498	-1.03158	1.16069	0.893946	0.476416	-0.848778	-2.45143	0.436973	1.0382	-0.0696092	-0.680536	-0.089566	0.598646	1.33828	-0.0956552	-1.35582	-0.310642	3.56391	-0.628272	-0.774836	1.25842	-2.49682	-0.120274	-1.48222	-0.93476	-0.236378	0.209654
ACACGAAGTTAGTTCA-0	1.27651	-0.923517	-0.276478	0.553287	-0.0879244	1.33722	1.47628	-0.675169	2.04004	-1.52898e-05	-0.0900562	-0.347466	-0.736182	-0.702583	-0.00873828	-0.0908107	-0.529638	0.11118	-1.30859	-0.301516	-0.512412	0.107677	-0.00252495	-0.860916	-0.145605	0.425446	0.528428	0.215671	-0.747346	1.90057	-0.0999641	0.859395	-1.54928	0.380487	0.265231	-0.470693	-1.40164	-2.18145	0.156704	-0.165413	0.434738	-0.385958	0.139366	3.43856
ACACGAAGTTCACCGA-0	0.767755	-1.00439	-0.455788	0.614259	-1.3207	-1.16139	-0.169083	1.83093	0.794649	-0.521988	-0.0909295	0.919659	-0.492409	-0.258452	-0.264825	0.201291	-0.338371	-0.144106	-0.844782	-0.987875	-0.148288	1.0144	0.624183	0.426534	-0.411842	-0.628154	-1.64045	0.3034	-1.30331	-2.90795	-0.0367469	1.6225	-0.372977	0.634555	-2.0432	0.547219	-0.0382313	2.6049	3.30504	0.571673	0.93324	-1.89098	0.495111	-0.191037
ACACGATCAACTTCAT-0	0.700392	0.850858	0.509182	-3.99509	0.483616	0.899829	-0.214351	0.96244	-1.02551	0.4001	-0.129497	-1.67746	-0.745372	1.00058	-0.671333	-3.35981	0.923721	1.74578	1.16318	1.17415	2.3753	-1.22522	0.693736	-1.40823	-1.63739	3.06952	-0.586357	0.532017	-0.116421	0.23116	0.0762226	0.687243	1.1379	1.86935	1.4298	1.60436	-0.292572	-0.801514	0.099509	0.541811	-0.942637	1.78602	-0.468091	-1.84535
ACACGATCAAGCGGTC-0	-0.667813	1.44227	0.640334	0.22903	0.33426	1.24218	-0.628114	1.00465	-0.5012	2.85251	0.492299	0.694385	0.243697	-0.408345	0.166173	0.437003	0.015039	-0.753526	-0.352677	-1.90417	0.10279	0.139508	-1.35425	-0.271733	-0.71594	-0.168029	-0.510764	-0.913176	-0.446456	-1.05305	0.831976	0.782678	1.14662	0.4574	-0.926196	0.174853	-0.169369	-0.837637	-0.774757	-0.285262	-0.257139	0.472119	0.198249	0.0587958
ACACGATCAGCAGTAT-0	0.164036	0.10997	0.232481	0.260038	-0.527651	-0.267608	1.93936	-1.09003	0.703261	-0.0102068	0.153414	0.0139904	0.772943	-0.224039	0.418364	-0.27889	0.619505	-0.994247	-0.0829535	-0.801697	0.342963	-0.72758	1.21248	0.32362	-1.092	0.610302	-0.371176	0.368946	1.24489	-1.32339	-1.48655	0.129212	-1.11158	-0.180973	-0.46255	0.253849	1.44935	-0.27183	-1.32226	0.306403	0.735503	-0.526713	-0.768568	1.57885
ACACGGGGTTTGGAGA-0	0.34344	0.524645	0.344088	0.352856	0.989291	0.620799	-0.00390659	0.459707	-0.875196	0.389925	0.0819247	1.14297	0.382691	-0.312768	1.13983	0.738662	-1.61071	-0.813112	-0.599581	-0.447016	-1.53119	-0.732059	-0.766634	-1.26525	-0.208306	0.0447606	0.723448	-0.85095	-0.307854	2.53199	1.58047	-0.522207	-1.41631	-0.491645	-1.12044	0.582588	-0.209008	-0.399761	-0.983466	-0.432628	0.54251	0.497182	-0.208007	0.445887
ACACGGTTCCCGCACT-0	-0.547102	-0.268436	1.4216	-0.740662	-0.103216	-0.0850817	-1.04241	-0.119219	0.290447	0.0407856	0.9976	-0.558446	0.461126	1.60158	-0.240441	1.17073	-1.06383	0.495624	0.143331	-1.41645	-1.2417	0.128847	-0.255477	-0.462424	-0.0447141	0.440363	0.276578	-0.822307	-0.692365	0.541711	0.577578	1.31832	-0.287877	2.21865	-1.35921	0.502008	0.00462875	0.137554	0.595521	-0.282999	0.446179	0.308143	-0.535283	0.215049
ACACGTTGTTTCGTAA-0	0.0652921	1.02572	1.81584	-2.86004	-1.62597	2.44811	0.0481124	-2.55696	-0.387113	-0.211352	-0.445185	-0.671168	-0.839529	1.29731	-0.990597	-0.948604	0.34142	1.4844	1.49432	4.54068	-0.0542539	-1.00435	0.0768941	-0.991591	2.03298	0.920192	-1.01624	-0.385479	-0.900671	0.370121	1.5137	-1.10771	2.00589	2.10141	0.958615	1.51538	1.78081	-2.14617	0.626057	-1.27025	-1.35189	2.11823	-4.24619	-0.52527
ACACTAGTCCGTATGA-0	-0.355237	1.50161	-0.408847	0.708231	1.67852	-4.32317	2.34637	1.80113	2.5923	0.11661	-4.54751	3.13554	-2.60011	1.62292	0.564804	-3.26216	-1.86865	-1.77618	-3.57454	3.50084	1.91599	-1.31406	1.37874	0.460599	4.49684	2.93352	2.27482	-1.6554	1.83759	-1.61967	-0.982564	0.186059	0.546392	1.21336	0.245984	-1.8519	-1.82335	-0.243658	0.151446	-1.67227	-3.42508	0.104	1.99626	0.153819
ACACTAGTCGCTTCCA-0	0.368485	1.27149	0.733387	-0.600065	0.860464	0.162771	1.05562	-0.425449	0.134946	-0.597352	0.175964	0.245054	0.242274	0.0900211	0.513903	0.374994	-0.364796	1.06772	-0.427263	0.253116	0.959021	-2.34531	0.226172	-0.377045	0.058751	-1.15354	2.21899	-0.57158	0.148042	-1.05595	-1.87095	0.299697	1.12952	-0.767089	-0.78909	0.119433	-0.232084	-0.640789	0.673325	1.28041	0.96384	-0.746956	1.43223	-1.10739
ACACTCCCAGTAATCA-0	0.320742	-1.01223	-2.17236	0.23412	0.980376	-0.108152	-0.00252112	-1.09025	0.954755	-0.291946	-0.585024	0.248152	0.0114773	-2.69682	2.95301	0.631641	1.06278	0.351734	-2.73702	-0.262424	0.189797	-0.255822	0.499774	-1.14336	1.8094	1.80741	-0.272116	-0.678297	2.22166	0.145305	-1.17662	0.00873237	-1.00481	-1.61016	-0.221191	-0.55572	-0.647851	1.80461	-0.0782066	1.21198	-0.0446599	-2.88814	0.418785	-0.419251
ACACTCCCATCCTTAG-0	-0.746309	0.26828	0.389677	1.85236	-1.7889	-0.238487	-0.120127	0.268483	-1.24121	2.09138	0.168809	0.150477	-0.534425	-0.989118	0.649076	0.750053	-0.0198822	-1.45908	0.42959	1.84257	0.585386	-0.255167	-0.0426758	1.06025	0.241214	-1.35143	-0.607426	-0.632955	-0.399219	0.540767	1.11499	-0.16906	-1.07293	2.24542	-0.487099	-0.847421	0.417445	-0.512105	1.82721	-0.258264	-0.828743	-0.179386	-0.174827	0.259167
ACACTGATCCGTATGA-0	-0.503061	0.369361	-0.127211	-1.25716	0.684538	0.695753	-0.603806	0.557973	-0.645372	-0.676967	0.469499	0.0845715	-0.825975	-0.180902	-0.653986	0.165912	0.0380892	-0.394046	-0.134144	-0.466584	-0.38198	0.681717	-1.35199	-1.19813	-0.698883	-0.122035	0.172099	1.57103	1.25816	0.96668	1.12227	0.0369	0.194073	0.0393953	0.563466	0.743908	-0.0672275	-1.16916	-0.670959	-0.729909	-0.497907	1.27449	-0.178031	0.436306
ACACTGATCTTGACTC-0	1.44478	-1.15662	-1.25046	0.427741	0.61374	0.662819	1.05444	-0.867241	-0.248332	1.54573	-0.621701	-0.309979	0.606967	-0.265591	-0.164522	-0.535686	0.971705	-0.642077	0.289071	-0.655348	-1.59334	1.79366	-0.194028	-2.70009	0.553751	-0.304614	-0.71399	-0.0221138	-1.95954	0.616341	2.32681	0.579416	-0.462709	-0.153961	1.00265	-1.96768	0.745752	2.2052	-0.518302	0.623683	0.478616	-2.04902	0.3416	1.22484
ACAGAACAGAACGGAT-0	-1.34175	1.41464	1.03466	0.660546	0.515095	-0.982325	0.714908	-1.21239	-0.10491	0.00923603	-0.130462	-0.60697	1.11125	0.895612	-1.44928	-0.450187	1.39425	0.372698	0.131047	-0.0471739	0.564655	-0.517432	-0.950726	0.682187	0.159801	0.488533	0.626317	0.451487	1.45834	-1.81331	-0.497154	-0.665793	0.918891	-0.279493	-0.289276	-1.30581	-0.538894	-0.846958	-0.273993	-0.768206	-0.401558	0.567593	1.17735	0.251527
ACAGAACAGGATGACG-0	0.563631	0.0987647	-1.35388	-1.23141	-0.172307	-0.477279	-0.833496	-0.0644136	-0.127963	0.522905	1.89244	-0.428982	0.129515	-0.993484	-1.47673	0.127834	0.489673	-0.332501	-1.01718	0.505874	-0.263421	1.00964	0.155397	0.384795	0.429792	0.51176	1.27123	0.462316	0.877251	-1.72045	-2.18057	0.606366	-0.856011	-0.471565	0.903662	0.528292	0.442649	-0.0814039	1.02429	0.0608892	0.756308	1.33484	0.4979	-0.0579648
ACAGAACAGGTTCCAA-0	-1.83282	-0.665047	1.37919	-0.395256	0.353676	-2.94922	-1.13714	-0.810913	-0.753308	1.02313	0.863218	0.418114	0.516726	0.780322	-0.355158	-0.827519	0.488366	0.0507299	0.613003	-1.76759	3.54528	-1.78747	-2.00517	0.968909	-0.434782	1.25379	2.03676	0.791175	1.63159	-0.121585	1.1001	-2.1436	1.35155	1.91727	0.535366	0.0369517	1.87697	-0.869321	-0.383463	0.381073	-0.649913	0.89518	-0.119204	-1.19817
ACAGACAGTAGCTATC-0	-1.21607	-0.715172	0.00597076	0.513502	0.839918	-0.390454	0.873292	-0.491952	0.302141	-0.581854	-0.373777	-0.423613	1.14629	-0.0667476	-0.357629	-0.516632	0.408322	-2.65821	0.488991	0.431874	0.00282339	-1.05943	1.16664	-0.00381352	1.00454	0.350121	-1.29379	1.32117	1.2443	0.554216	0.2334	-1.5699	0.648522	0.753173	0.142119	0.128918	1.7115	-0.0894715	-0.621905	0.0208644	-0.387384	0.626955	0.546566	-0.187577
ACAGACAGTTGGAAGC-0	-0.827312	0.116133	0.942336	0.259437	-0.788029	0.0358303	1.35228	-0.151051	0.928136	-0.370269	0.263129	-0.752586	0.370392	-0.0430052	-0.105015	-0.497185	0.582382	-0.0233218	-0.0706602	-0.789055	1.03902	-0.327914	0.887359	0.00275222	-1.28696	-0.431685	1.21747	-0.288734	0.847693	-0.538504	-1.36497	-0.85546	-1.03821	-0.804227	-0.28406	2.18964	1.24165	-0.697384	0.442662	0.0609557	1.14384	-0.324618	-0.417895	0.700756
ACAGACAGTTTAGCAC-0	1.74872	-0.333345	0.0700683	0.894153	0.468554	0.585967	-0.185267	0.348797	-1.26263	1.45257	0.448148	-0.381049	0.58186	-0.872955	-0.889591	0.307882	-0.259335	-0.908134	-0.3966	-0.711041	-1.03127	0.933524	-0.217448	0.607185	-0.808163	-1.2504	-0.347193	1.75468	-1.64058	0.286293	1.67368	1.25498	-0.820497	0.59102	-0.162844	0.191167	-0.242028	-0.385847	1.36892	0.121476	-0.177231	-0.115894	0.674437	-0.665194
ACAGACTCAACCTCGT-0	-1.47948	-0.893712	0.106939	-0.763876	-1.06898	0.160517	1.10639	-0.320885	0.696866	-1.98207	-0.145142	-1.04188	-1.96291	0.858214	0.25036	0.295749	0.194834	-0.404676	1.21151	-0.305897	0.610465	-1.37295	1.26886	-0.126143	0.458455	-0.662678	-1.68331	-1.66328	0.516102	2.32723	-1.0905	-0.501426	2.04731	-0.543411	0.495242	0.923328	0.175652	-0.489929	-0.3652	1.72028	0.661305	-1.59812	0.0925388	0.969032
ACAGATGGTAAGCTGA-0	0.505753	-0.771157	-0.660778	0.971941	-0.0711597	-0.00834054	-0.735488	0.784735	-0.00243208	0.2834	0.241734	-0.516615	-0.130117	0.457222	0.457995	-0.921164	0.98239	-1.02522	-1.38172	0.0674371	0.331727	-1.20468	-0.392446	1.07274	-0.834296	-1.03419	0.304879	0.462892	0.832771	0.78379	-0.785312	0.457487	0.898513	1.03954	1.69734	0.405997	-0.637465	-2.09728	0.308042	0.62345	-0.495668	-0.958802	1.06952	-0.355101
ACAGATGGTCAAGTCT-0	-0.201433	-1.21856	0.218419	0.698097	-0.806339	-0.79713	0.830377	0.539941	-0.143026	1.9519	0.156333	-0.661946	1.31059	0.189249	-0.229044	0.9894	0.817736	0.0644074	0.0931732	0.297597	0.76701	-0.497284	0.426262	0.263339	-0.213562	-1.32573	-1.00235	-0.0226456	-0.0887954	-0.267147	-0.0279205	1.51796	-0.649735	-0.0756351	-0.424952	-0.343477	2.02003	-0.401927	0.00607597	0.0599327	0.885599	-1.31054	0.341416	-0.570579
ACAGCAAGTGCAACTT-0	2.06282	-0.102457	-2.75491	-0.476991	0.316223	1.00959	0.0573582	0.513968	-1.95194	1.21957	0.261821	-0.223807	2.32729	-0.678241	-1.81764	-0.0190542	-0.573249	-0.122771	-0.365985	-0.15493	-1.1577	2.60768	0.290389	0.634394	-0.209521	-1.41043	-0.445098	0.461907	-1.34763	0.108411	1.37724	1.48878	0.35406	-1.38918	-0.730852	1.86807	0.716491	1.84671	-1.6126	0.977289	2.41202	-1.85096	-0.211884	-2.65896
ACAGCAAGTGGCTTCA-0	-0.588535	-0.0610831	0.627066	-0.601884	0.941726	-0.0379783	-0.795575	-0.31651	-0.816773	-0.393299	-0.914903	1.76986	0.524189	1.00258	1.04264	0.265491	-2.20003	-1.21444	-0.143683	0.600478	-1.10017	0.0889672	0.412471	-0.662064	-0.284593	-0.353452	-1.15033	-1.1421	-0.127897	-0.638448	0.490015	-0.274935	0.0124308	-0.135056	-0.228459	0.938775	-0.774722	0.410755	1.48594	-1.2576	1.33921	0.00844878	-0.462791	0.302112
ACAGCCACAAAGGTGA-0	1.10906	0.103369	-0.757422	1.49856	1.95053	-0.12317	-1.66969	-0.199114	0.757812	0.280351	1.00182	0.503143	0.0115533	0.311925	-0.100344	-1.63698	0.469861	-0.0530057	-1.17811	-0.375711	-0.796884	-1.84766	-0.836111	-0.36931	0.90422	2.38856	-0.931763	-0.287901	0.204705	0.0821457	0.949421	0.284048	-0.488664	-0.0226026	-0.2185	-2.95986	-1.95992	0.881274	0.288926	1.55152	0.0929129	-0.532633	0.751761	0.31141
ACAGCCACATCGGCTT-0	-0.450685	-1.31719	1.76492	1.87446	0.575992	-2.87127	-0.46025	-0.390773	-0.222535	1.02582	0.459675	-1.5034	-0.7372	-0.783058	-1.95029	-0.933379	1.73153	-0.493683	0.749268	2.44707	2.41814	-0.900373	-0.75403	-0.330852	-0.717132	0.437497	1.18856	0.938615	1.36303	-0.941233	0.938611	0.331185	1.49567	3.4214	1.05302	0.463185	1.48814	-0.425405	0.158019	2.51485	-1.97132	-0.21207	-0.862148	-1.17197
ACAGCTATCAATCCAG-0	-0.711044	0.779162	-0.0868657	-0.168059	0.115885	0.293961	-0.092498	-0.646962	0.791103	-1.82531	0.936613	-1.2288	-0.0445606	-1.16503	0.167331	0.370374	-0.0592142	0.141634	0.115459	1.29596	-0.392264	1.38644	0.41635	-0.00412089	-0.472232	-0.27844	-0.305332	-0.132469	-0.541684	0.364214	0.628334	-0.116102	1.42729	-1.04064	0.192929	-0.368437	-0.319865	1.14744	-0.947015	-1.49457	0.157133	-0.656019	0.204534	-0.470742
ACAGCTCAGCAAGCCT-0	0.767066	-0.458592	-0.729135	2.19653	0.0515461	0.458479	-0.678298	-0.575596	-1.99849	-0.451473	1.43688	0.0422538	0.140017	-0.733607	0.0559699	0.205146	0.457423	0.73927	-0.818237	-0.535001	-0.0101585	-0.784166	-0.314897	0.645404	-0.230705	-3.40456	-0.0440005	1.59561	-0.733541	-0.0334088	0.822053	0.373402	-0.700219	1.24943	1.77623	0.399323	-0.631388	0.161214	0.957657	0.385516	-1.31748	0.685122	-0.328693	-1.31952
ACAGCTTGTGACTCCA-0	0.337825	-0.679743	0.143675	-0.0426017	1.19369	-0.476593	0.0664826	0.0852689	-0.825871	0.210347	0.498182	-0.933783	-0.0204504	0.593886	0.455105	-0.167104	0.517554	0.716724	0.123704	-0.736243	-0.115775	-0.250375	0.131623	0.928753	-1.2018	-0.341913	-0.0675031	0.0720188	0.193079	0.300545	0.295071	-0.819217	0.0856648	1.0163	-0.156794	0.0948823	0.151943	-0.705076	-1.13693	0.520432	0.447456	-0.668662	0.741975	-0.875973
ACAGCTTGTGCAGCTC-0	-1.53159	0.0704424	2.15035	-0.0212572	-2.27097	-0.24806	-0.383126	0.297078	-0.218727	-0.449437	0.738346	-0.657942	0.569825	0.539332	0.975665	-0.12392	1.96529	1.47933	0.380611	-0.11868	0.123022	-1.16667	0.586949	0.0100217	1.0597	0.331473	-0.324807	-0.321464	-0.44906	-0.718106	0.268696	0.135484	0.938065	1.09413	-0.804681	-1.00951	-0.277035	-0.343927	0.587438	0.115281	0.629649	0.62921	1.29744	-0.969747
ACAGCTTGTGGAGCCA-0	0.788061	-0.851781	0.4267	0.834654	1.0802	-1.50187	-0.262529	-0.668011	-0.11331	1.0206	-0.242324	-1.37119	0.691378	1.03625	-0.47451	-0.714137	0.708262	-0.922329	0.50788	0.559953	-0.0699784	-1.06905	0.921686	-0.849267	0.656535	-0.344973	-1.31401	1.43423	0.559712	0.797636	0.279031	0.0627409	1.36083	0.617076	-0.362935	0.330931	2.02236	-0.338649	-1.58446	-0.998038	-0.0759003	-1.04907	0.659106	-0.565873
ACAGGAACAATTCATC-0	0.588047	-0.504811	0.569351	0.865856	-0.347401	-0.0696852	0.664195	-1.20632	-0.417366	0.88957	0.305246	0.747017	1.06189	0.484342	0.72646	-0.227496	-0.442547	-0.496831	0.284456	-0.455872	-0.820061	0.393247	-0.316361	0.207855	0.299962	0.0698943	-0.891578	0.733864	-1.28731	1.17132	-0.511773	-0.326708	-0.787989	-0.254572	-0.272781	0.128951	-1.12568	-1.20187	0.655951	1.23732	0.564269	0.808069	0.743178	0.782146
ACAGGAACAGGGACTC-0	1.31809	-1.352	0.137546	-0.721485	-1.26171	-0.683323	1.35486	0.301101	0.72029	-0.736907	0.248913	-0.213442	-0.111829	0.878699	0.952751	0.596714	-0.0481941	0.260461	0.226836	-0.416854	0.652769	0.303536	-0.911204	-1.86963	-0.998826	-0.373427	0.111115	-0.559849	-0.216113	1.01391	0.442354	0.955256	1.51127	0.0274832	0.701694	0.873032	1.35427	-0.0533225	0.472719	-0.260683	-1.04353	-2.53071	0.479656	0.128823
ACAGGATAGTGAAGCG-0	-0.472222	0.295258	0.685633	0.589466	0.303834	-1.13568	0.525933	0.429304	1.81899	0.54475	-0.311721	0.421564	-1.68623	-1.65762	0.0184038	-0.162171	0.253663	0.841423	-2.0054	2.1735	1.31811	-0.820532	-0.751001	-0.622467	0.803044	1.07797	-1.04295	-1.16914	1.17958	0.384189	1.15559	0.536995	0.976026	-0.710692	2.14124	-0.948895	-0.957107	-0.854255	-0.763997	-1.90547	-1.02721	-0.136485	0.77481	-0.00781366
ACAGGATAGTTAGATC-0	2.45598	1.28189	-0.315572	-1.11492	0.620381	2.04324	-0.0326331	-1.40998	-0.437643	-0.0999849	1.37414	2.81659	0.1129	-0.0307088	-1.43508	0.499009	-1.62882	-0.517238	2.39793	-0.368381	-0.991843	-1.09794	-1.41514	-2.42772	-0.394891	-0.214647	4.14296	-0.36444	-2.07897	-0.430445	-1.58135	-0.728742	-3.37424	0.370358	-0.907733	1.4762	-0.805112	1.43298	0.936606	0.804907	2.48301	1.0565	-1.61662	0.694877
ACAGGCAAGCAACCCG-0	0.613369	-0.367875	-1.04671	0.075625	-0.0847528	0.271756	-0.441148	1.51534	-2.00534	0.419521	1.07057	0.161474	0.552121	-0.00740874	0.545217	-0.38775	0.854947	-0.0584944	-0.89312	-0.197272	0.360406	-0.849365	-0.606791	1.24424	-0.350016	0.394603	-0.355553	1.58577	0.806836	0.1166	-0.98482	-0.0334095	0.614585	-1.11349	1.59762	-0.508891	0.551136	-1.52453	0.520526	0.744999	-1.33828	-1.08698	2.09669	-0.594934
ACAGGCAAGCATAGTT-0	-0.066517	-0.187009	-1.67958	0.935222	0.926615	0.77691	0.0235522	0.397036	-0.668937	-0.509065	-2.26714	2.88355	-0.60659	1.90406	2.088	-0.996628	-2.14186	-1.16957	1.007	0.74146	-1.27796	-1.32403	-0.98611	-0.0696785	-0.637178	-0.602368	-0.941121	-2.7874	-0.11393	4.07027	0.502993	-2.30868	1.13718	-0.952174	1.39751	-0.072937	-1.08095	-0.667324	-1.93041	0.429752	0.554955	-1.62753	0.923917	2.19364
ACAGGCAAGGGGTTGA-0	1.86902	0.122477	-0.157618	-1.28056	0.652534	0.217096	1.72423	0.0209616	-0.641379	-0.897105	-2.50571	0.85468	-0.909532	1.62416	0.854526	-0.577548	-1.12847	0.918931	0.032521	-0.997671	1.09441	1.2901	0.496666	0.983713	-0.794967	0.284434	-0.226503	-0.258783	-0.349723	1.24987	-0.382779	-1.05799	-0.0689535	-0.44346	-0.25486	0.967038	-0.0924829	-0.735102	-1.19137	1.56283	-0.151418	0.528916	-0.415077	-0.560898
ACAGGCAAGTAACCTG-0	-1.78532	-1.75518	1.90685	-0.543669	0.992993	1.37938	-0.570123	-0.012424	-1.94865	0.312277	-0.36393	1.04606	-0.103178	2.37621	1.43144	1.63795	-0.602224	-0.784427	-0.26056	-1.40585	-1.30621	1.12625	0.848058	0.343578	1.06283	-0.925065	-0.698907	-1.32005	-0.524547	-1.27611	0.28631	-0.683682	-0.151093	1.11696	-0.584533	-1.63282	0.183562	0.704442	0.524302	0.4434	1.03829	0.291413	-2.31202	1.91458
ACAGGCGGTGCGTAGG-0	-1.12351	1.27027	-0.336999	1.04069	-0.0148211	-0.138985	-1.7278	-0.215236	-0.805525	0.449733	-0.566909	1.11887	0.383216	0.715358	-0.00803505	-0.324484	0.699815	-0.339767	0.942753	0.304028	-1.71481	1.84022	0.0779225	0.767153	-0.769726	-0.630122	-0.300282	0.571528	0.951354	-0.547492	-0.230026	-1.55556	-0.262551	-0.341781	-0.571112	-0.419664	0.584904	1.21227	-0.0648815	-0.83886	-0.775883	-1.07244	0.139076	-0.433667
ACAGGCTTCCCTGTCA-0	-0.52394	-0.460969	0.560238	0.77589	2.08407	0.219837	0.666315	-0.579825	-1.84817	2.06687	-0.522918	-0.44914	0.0345513	-0.135399	-1.09183	-0.514454	0.846941	-0.301881	1.19308	0.209581	1.17949	1.02484	-1.12635	-0.270296	-0.72291	-0.874915	1.07884	0.73951	1.45018	0.423219	-0.326815	-0.667336	0.207327	-0.23649	1.33931	-1.62906	1.44052	-1.00614	0.00403927	1.34285	-0.255653	-0.215347	-0.53807	-1.65499
[truncated: 9,056 more rows]
